# Supplementary material for: Epigenetic regulation of innate immune memory in microglia
Source: J Neuroinflammation. 2022 May 14;19:111. doi: 10.1186/s12974-022-02463-5 (PMC9107649; doi:10.1186/s12974-022-02463-5)
Supplement: Supplementary file 6 — Additional file 6: Count table and differentially expressed genes for all comparisons in the primed mouse model (related to Figs. 1 and 4). [file 12974_2022_2463_MOESM6_ESM.csv]

ensembl_gene_id	external_gene_name	entrezgene_id	description	KO_PBS_642	KO_PBS_641	KO_PBS_638	KO_LPS_600	KO_LPS_194	KO_LPS_193	Control_PBS_175	Control_PBS_171	Control_PBS_170	Control_LPS_185	Control_LPS_184	Control_LPS_149	WT_LPS-WT_PBS_logFC	P.Value	adj.P.Val	KO_LPS-KO_PBS_logFC	P.Value	adj.P.Val	KO_PBS-WT_PBS_logFC	P.Value	adj.P.Val	KO_LPS-WT_LPS_logFC	P.Value	adj.P.Val	KO_LPS-WT_PBS_logFC	P.Value	adj.P.Val	KO_PBS-WT_LBS_logFC	P.Value	adj.P.Val
ENSMUSG00000098104	Gm6085		predicted gene 6085 [Source:MGI Symbol;Acc:MGI:3646770]	1.492298403	1.000889906	1.098953145	1.394601543	1.384137466	1.864449835	1.145467586	1.545582191	0.541296005	1.244235138	0.937506697	1.088292252	-0.004430147	0.987767343	0.992769782	0.385747837	0.264421375	0.355015148	0.125405216	0.682305952	0.801233667	0.5155832	0.144908923	0.25308961	0.511153053	0.190431729	0.267354985	0.129835363	0.623527095	0.703201689
ENSMUSG00000103922	Gm6123		predicted gene 6123 [Source:MGI Symbol;Acc:MGI:3647047]	0.784299267	1.510248296	0.530755872	0.598920788	1.262102807	1.026092135	1.537722926	1.715007624	1.036498137	1.687183725	1.44903853	0.974691957	-0.019463901	0.95318803	0.969639687	0.111531996	0.772406719	0.825024923	-0.514906403	0.160703027	0.312498104	-0.383910506	0.330180331	0.468678438	-0.403374406	0.357698172	0.446945764	-0.495442502	0.121178942	0.1834388
ENSMUSG00000033845	Mrpl15	27395	mitochondrial ribosomal protein L15 [Source:MGI Symbol;Acc:MGI:1351639]	4.052628249	3.948836992	4.082225762	4.355608925	4.319973796	4.088815953	4.187487788	4.283058622	4.058748711	3.829641891	3.962920879	3.867117612	-0.282353354	0.030875772	0.078128638	0.211603119	0.129778279	0.200275478	-0.150890631	0.236122799	0.403421217	0.343065842	0.022517331	0.059424536	0.060712488	0.685705901	0.752019135	0.131462723	0.224311756	0.306048149
ENSMUSG00000102275	Gm37144		predicted gene, 37144 [Source:MGI Symbol;Acc:MGI:5610372]	0.594936623	0.544842813	0.612426531	1.428543342	1.308684379	0.903514385	0.219858788	-0.074627968	0.628025797	0.339402215	1.007847499	0.54459352	0.42024942	0.185913251	0.303134611	0.575288641	0.125012577	0.19423719	0.331538129	0.3139022	0.488597128	0.48657735	0.18891376	0.310174914	0.90682677	0.038781443	0.071616608	-0.088711291	0.749913207	0.811291509
ENSMUSG00000025903	Lypla1	18777	lysophospholipase 1 [Source:MGI Symbol;Acc:MGI:1344588]	4.881515755	4.745428254	4.949697085	4.947965057	4.987949965	4.859701145	4.870158122	4.775493919	5.059427307	4.688116832	4.882721884	4.879382711	-0.08545808	0.476479315	0.604387386	0.077120807	0.56548745	0.648538897	-0.05101392	0.68462223	0.803274664	0.111564967	0.410096498	0.549061348	0.026106887	0.863031309	0.897935212	0.03444416	0.744554771	0.806813953
ENSMUSG00000104217	Gm37988		predicted gene, 37988 [Source:MGI Symbol;Acc:MGI:5611216]	3.299112282	3.341894949	3.205887887	3.613604665	3.514270086	3.621210924	3.44585028	3.494660117	3.325076254	3.626695162	3.466299557	3.452058617	0.094446011	0.438819451	0.569035734	0.29557969	0.048976747	0.089831657	-0.137313481	0.291866831	0.465726398	0.063820198	0.642667909	0.753111677	0.158266209	0.316351381	0.404785243	-0.231759492	0.050277475	0.088356063
ENSMUSG00000033813	Tcea1	21399	transcription elongation factor A (SII) 1 [Source:MGI Symbol;Acc:MGI:1196624]	4.979365117	4.771268522	4.728526038	5.180505622	5.15061828	5.349326814	5.10841131	5.17979237	4.940600998	5.227346735	5.113110937	5.102192474	0.074399605	0.519163381	0.641999082	0.412254742	0.007157559	0.018718406	-0.252979469	0.055006646	0.151527329	0.084875667	0.511995184	0.642863079	0.159275272	0.286910208	0.373933447	-0.327379074	0.007066132	0.017337108
ENSMUSG00000033793	Atp6v1h	108664	ATPase, H+ transporting, lysosomal V1 subunit H [Source:MGI Symbol;Acc:MGI:1914864]	4.996629977	4.997004608	5.163238037	5.445036698	5.262649311	5.208293525	5.021561816	5.047896294	5.069659175	5.061596366	5.134358853	5.211341451	0.080434963	0.427261494	0.558006644	0.230490233	0.058483542	0.104441877	-0.000114514	0.999132356	0.999452931	0.149940756	0.197319426	0.320042203	0.23037572	0.090656584	0.145377037	-0.080549477	0.372008726	0.462580131
ENSMUSG00000025907	Rb1cc1	12421	RB1-inducible coiled-coil 1 [Source:MGI Symbol;Acc:MGI:1341850]	5.388799987	5.576405505	5.490902506	4.762887533	5.013852742	5.116097454	6.009695997	5.991841177	6.070115188	5.658735587	5.578247958	5.711477642	-0.385619293	0.002898407	0.012831316	-0.497815754	0.00100732	0.003892979	-0.530903595	0.000420529	0.004459532	-0.643100056	0.000133804	0.001087019	-1.028719349	6.43963E-06	6.4313E-05	-0.145284302	0.131753139	0.19672341
ENSMUSG00000090031	4732440D04Rik	654788	RIKEN cDNA 4732440D04 gene [Source:MGI Symbol;Acc:MGI:3604103]	0.797405427	0.735577102	0.646644285	1.317241843	0.13843492	0.364626056	1.603382566	1.279210247	2.101687771	-0.48726612	0.491385373	-0.178810845	-1.653697064	0.000967013	0.005559683	-0.233313998	0.599356497	0.678586835	-0.936149089	0.035682138	0.111417456	0.484233977	0.286827413	0.422590563	-1.169463087	0.033447296	0.063407455	0.717547975	0.057281311	0.098667324
ENSMUSG00000103845	Gm19026		predicted gene, 19026 [Source:MGI Symbol;Acc:MGI:5011211]	2.292805312	2.282022676	2.429552874	1.039510659	1.347200694	0.882931783	2.073837636	2.157548994	1.915006853	2.238854067	2.010612393	2.089039283	0.056847123	0.742954286	0.82377851	-1.246516122	4.98122E-05	0.000356513	0.290316039	0.13256673	0.274295057	-1.013047206	0.00028909	0.001962875	-0.956200084	0.001089201	0.003714084	0.233468916	0.15487611	0.225840015
ENSMUSG00000051285	Pcmtd1	319263	protein-L-isoaspartate (D-aspartate) O-methyltransferase domain containing 1 [Source:MGI Symbol;Acc:MGI:2441773]	5.85295478	5.794682831	6.000935095	5.298051049	5.513286864	5.401880081	6.04297395	6.013759337	6.179808369	5.658594566	5.827078177	5.910927656	-0.289418582	0.024397905	0.065406348	-0.448334312	0.003760775	0.01116841	-0.209228626	0.101273856	0.228244063	-0.368144356	0.012043741	0.036159855	-0.657562938	0.000669681	0.002486824	0.080189956	0.428199	0.52043224
ENSMUSG00000103509	Gm38372		predicted gene, 38372 [Source:MGI Symbol;Acc:MGI:5611600]	3.53105761	3.548893218	4.101076725	3.222057744	3.438439767	2.952199085	3.670111704	3.545179152	4.082140079	3.292532624	3.702566573	3.911002729	-0.150549731	0.536270913	0.656415861	-0.52987951	0.073392609	0.125749025	-0.046207494	0.85603261	0.91728848	-0.425537272	0.140831577	0.247305306	-0.576087003	0.083172999	0.135411338	0.104342238	0.631274739	0.71012556
ENSMUSG00000048538	Gm9826		predicted gene 9826 [Source:MGI Symbol;Acc:MGI:3642725]	0.9545967	0.926157584	0.988165204	0.901033161	1.398950944	1.775873136	0.360605418	0.1336206	0.661985546	0.942257201	0.163167787	0.825287986	0.199428025	0.531993472	0.652809232	0.492712954	0.197808314	0.281293183	0.575626472	0.105237244	0.234295875	0.8689114	0.03456307	0.08329845	1.068339426	0.022061521	0.044635953	0.376198446	0.208615293	0.28865375
ENSMUSG00000076135	Gm24276		predicted gene, 24276 [Source:MGI Symbol;Acc:MGI:5454053]	0.962337503	0.533012179	1.057417043	1.052625964	1.513786029	0.932132973	0.241234874	0.355282231	0.124084735	0.181883121	0.443918848	0.427810259	0.113776809	0.676143034	0.773833101	0.293936728	0.360947497	0.456009696	0.629030549	0.045955838	0.133718811	0.809190468	0.023976245	0.062479458	0.922967277	0.021329957	0.043435322	0.51525374	0.056334626	0.097302079
ENSMUSG00000061024	Rrs1	59014	ribosome biogenesis regulator 1 [Source:MGI Symbol;Acc:MGI:1929721]	3.296495818	3.700062031	3.529358829	5.537588374	5.1521047	5.376246004	3.649027199	3.586770685	3.826595364	4.742612357	4.723799245	4.814903848	1.062202936	7.85227E-06	0.000149225	1.803798269	1.40006E-07	4.43856E-06	-0.173653286	0.24950398	0.41886517	0.567942047	0.003448095	0.013558148	1.630144984	1.34906E-06	2.01166E-05	-1.235856222	5.97878E-07	1.17478E-05
ENSMUSG00000025911	Adhfe1	76187	alcohol dehydrogenase, iron containing, 1 [Source:MGI Symbol;Acc:MGI:1923437]	-2.209470615	-1.372924844	0.314864091	1.486491903	0.222046793	0.462891279	-4.113771279	-2.01480366	-5.886614816	-1.554313773	-2.253596321	0.236144212	2.564289589	0.037297588	0.090236519	1.645337659	0.214624055	0.30034828	2.894446342	0.027765655	0.09330442	1.975494412	0.143048138	0.250406343	4.539784001	0.007821364	0.018968993	0.330156753	0.742939933	0.805441045
ENSMUSG00000079671	2610203C22Rik	72481	RIKEN cDNA 2610203C22 gene [Source:MGI Symbol;Acc:MGI:1919731]	4.227366967	3.832971383	3.858592359	1.852972733	2.045119025	2.070755786	3.60715603	3.552459431	3.62441919	2.964001337	3.395924478	3.062712187	-0.422627176	0.030360824	0.077177047	-1.951999684	6.73827E-07	1.40764E-05	0.374098935	0.061239075	0.162975715	-1.155273573	9.3835E-05	0.000837223	-1.577900749	1.68652E-05	0.000133728	0.796726111	0.000285706	0.001278271
ENSMUSG00000025912	Mybl1	17864	myeloblastosis oncogene-like 1 [Source:MGI Symbol;Acc:MGI:99925]	1.627442296	0.660009883	0.315615642	-0.368692047	-0.496065189	1.4061769	1.028919272	1.512441485	0.274101214	0.215288939	0.494587227	0.27685642	-0.590244195	0.259445978	0.38845482	-0.522684656	0.384583669	0.479762602	-0.074463636	0.889459073	0.938006941	-0.006904097	0.990697519	0.994923006	-0.597148292	0.373789721	0.463467226	0.515780559	0.27834706	0.36530915
ENSMUSG00000045210	Vcpip1	70675	valosin containing protein (p97)/p47 complex interacting protein 1 [Source:MGI Symbol;Acc:MGI:1917925]	6.638733262	6.647146655	6.636720934	6.978487613	6.981448341	7.06826996	6.872909112	6.986245856	6.742319664	6.751033725	6.809402866	6.817976448	-0.07591547	0.430088218	0.560591623	0.369040179	0.003771574	0.011190669	-0.226933556	0.039827339	0.120656609	0.218022093	0.054246192	0.118656606	0.142106623	0.248100268	0.331500329	-0.151018086	0.087608562	0.140571353
ENSMUSG00000025915	Sgk3	170755	serum/glucocorticoid regulated kinase 3 [Source:MGI Symbol;Acc:MGI:2182368]	5.957074177	6.006039915	6.000131799	5.168205472	5.573405069	5.485289254	5.972722165	6.088933121	5.8279567	5.746668869	5.866259128	5.857124732	-0.139143088	0.222486378	0.347278737	-0.53532495	0.000888033	0.003517695	0.026153026	0.821832335	0.89769769	-0.370028835	0.009858468	0.030836382	-0.509171924	0.003260926	0.00919813	0.165296115	0.107941797	0.166466191
ENSMUSG00000098234	Snhg6		small nucleolar RNA host gene 6 [Source:MGI Symbol;Acc:MGI:1921074]	2.269805762	2.072239268	2.543905063	3.134541184	2.353709936	2.684756874	0.957949381	1.680205534	0.188446334	1.749556056	1.669839423	2.089503897	0.84866322	0.026648861	0.069876943	0.354568988	0.373500269	0.468563321	1.348513763	0.002734583	0.017684841	0.854419532	0.047143411	0.106196898	1.703082752	0.002180819	0.006587504	0.499850544	0.124407013	0.187345498
ENSMUSG00000099032	Tcf24	100039596	transcription factor 24 [Source:MGI Symbol;Acc:MGI:3780500]	-0.298548897	1.021503827	0.848360613	-3.171601474	-0.057745361	-1.10316039	0.459485197	0.508194019	0.626770249	0.267547849	0.133747864	0.955300626	-0.151054072	0.784295074	0.853606014	-1.685738962	0.020889325	0.04492175	-0.032281339	0.955678268	0.976331965	-1.566966229	0.029703305	0.073817231	-1.718020301	0.031718105	0.060600731	0.118772733	0.813097207	0.861860705
ENSMUSG00000025917	Cops5	26754	COP9 signalosome subunit 5 [Source:MGI Symbol;Acc:MGI:1349415]	4.829035618	4.689203483	4.93820111	5.128782805	5.04040966	5.046725853	4.78194353	4.935705624	4.619409039	4.857367748	4.633701345	4.895806415	-0.006128749	0.962561744	0.975055254	0.248479371	0.110970352	0.176203009	0.031254544	0.820709285	0.897103894	0.285862664	0.071783223	0.147463592	0.279733915	0.113703922	0.175391393	0.037383293	0.74812146	0.80966838
ENSMUSG00000056763	Cspp1	211660	centrosome and spindle pole associated protein 1 [Source:MGI Symbol;Acc:MGI:2681832]	4.538333756	4.394471362	4.618329937	4.373979874	4.229923067	3.926350166	4.401987856	4.223506539	4.616871777	4.317505733	4.144456822	4.198952707	-0.197237722	0.181626458	0.297682251	-0.369824288	0.037389495	0.071941118	0.101851861	0.499831526	0.660047602	-0.070734705	0.659893391	0.766235288	-0.267972427	0.158008001	0.229718532	0.299089583	0.033973264	0.063589762
ENSMUSG00000067851	Arfgef1	211673	ADP-ribosylation factor guanine nucleotide-exchange factor 1(brefeldin A-inhibited) [Source:MGI Symbol;Acc:MGI:2442988]	6.197002049	6.376308849	6.371844447	6.66742288	6.461352732	6.533053637	6.403149558	6.450433217	6.417706802	6.295667488	6.314208989	6.381701337	-0.102106659	0.295547783	0.428409906	0.204418961	0.069498552	0.120112003	-0.102959934	0.315058095	0.489905891	0.203565686	0.071016467	0.146308876	0.101459027	0.404792346	0.493494978	-0.000853275	0.991791263	0.994003491
ENSMUSG00000005886	Ncoa2	17978	nuclear receptor coactivator 2 [Source:MGI Symbol;Acc:MGI:1276533]	6.526124278	6.815526231	6.681281659	6.427624909	6.399292284	6.3936105	6.895324828	6.909608687	6.898007351	6.627814605	6.609679997	6.608554082	-0.2871376	0.013912229	0.042495313	-0.293815297	0.019145255	0.041811962	-0.20525734	0.072421735	0.181767433	-0.211935037	0.074181041	0.151215895	-0.499072637	0.001961521	0.006054088	0.08188026	0.358858615	0.449082414
ENSMUSG00000103085	Gm38120		predicted gene, 38120 [Source:MGI Symbol;Acc:MGI:5611348]	-1.237755819	0.328637549	-0.372343695	1.225425718	0.22351537	0.152906972	0.116674839	0.260128443	0.080003741	0.867137445	0.678167128	0.781550707	0.605666159	0.165976513	0.278842148	0.871267105	0.093316722	0.152797566	-0.619749911	0.177719285	0.334581421	-0.354148965	0.472172704	0.607410242	0.251517194	0.644027146	0.715803273	-1.22541607	0.007124897	0.017456625
ENSMUSG00000101171	Gm7593		predicted gene 7593 [Source:MGI Symbol;Acc:MGI:3647262]	-0.092019831	0.541425533	-0.248342549	0.216548975	0.295525843	0.318070825	-0.948233741	0.746946339	-3.370231738	0.970696356	0.602682659	0.329172119	1.827322287	0.038107571	0.091776573	0.248231339	0.787866826	0.837481517	1.21832417	0.164382018	0.317386379	-0.360766779	0.69717569	0.795561416	1.466555508	0.172662563	0.24669632	-0.608998118	0.406732157	0.4980658
ENSMUSG00000025935	Tram1	72265	translocating chain-associating membrane protein 1 [Source:MGI Symbol;Acc:MGI:1919515]	8.082697406	8.220087826	8.201989971	7.67635335	8.021289079	7.879899114	8.209414894	8.249123008	8.151550533	7.939711942	7.896161475	7.94628991	-0.27899987	0.020733212	0.057662818	-0.278067487	0.03054184	0.061074888	-0.024733833	0.823843751	0.898832573	-0.02380145	0.836386884	0.894081197	-0.30280132	0.03963294	0.072930567	0.254266037	0.016133982	0.034171867
ENSMUSG00000025937	Lactb2	212442	lactamase, beta 2 [Source:MGI Symbol;Acc:MGI:2442551]	5.680887137	5.790063329	5.624850642	4.386577184	4.542075549	4.511732674	5.771187013	5.70736636	5.782224228	5.595293151	5.45466061	5.419202647	-0.258464327	0.021490319	0.059328997	-1.208149786	2.23196E-07	6.26392E-06	-0.043329089	0.678600528	0.798657901	-0.993014548	1.60062E-06	4.6831E-05	-1.251478875	5.97895E-07	1.12243E-05	0.215135238	0.02820002	0.054300817
ENSMUSG00000081201	Smt3h2-ps4		SMT3 suppressor of mif two 3 homolog 2, pseudogene 4 (S. cerevisiae) [Source:MGI Symbol;Acc:MGI:2149598]	1.57364878	1.698299287	1.565082369	2.009096605	1.831694078	1.848555668	1.531116389	1.51656242	1.518338083	1.677159357	1.588696092	1.536671135	0.082807719	0.613792319	0.722978031	0.26873206	0.172561188	0.251861738	0.088177811	0.61126792	0.748302251	0.274102152	0.165072468	0.280203657	0.356909871	0.111373992	0.172237281	0.005370092	0.9710549	0.979231611
ENSMUSG00000082193	Rpl5-ps1		ribosomal protein L5, pseudogene 1 [Source:MGI Symbol;Acc:MGI:3647110]	5.141591921	5.040803733	5.231923218	5.593052666	5.660706352	5.515518503	4.368450504	4.449334502	4.309423077	4.572993721	4.696964296	4.725545363	0.285895296	0.016416536	0.048337964	0.457184931	0.001982849	0.006729961	0.755149145	2.04417E-05	0.000510748	0.926438781	5.43457E-06	0.000104278	1.212334077	1.36085E-06	2.02409E-05	0.469253849	0.000284776	0.001274932
ENSMUSG00000025925	Terf1	21749	telomeric repeat binding factor 1 [Source:MGI Symbol;Acc:MGI:109634]	3.73137317	3.200181809	3.146376544	2.79155456	3.020325244	3.098631189	3.547313432	3.334585426	3.703670276	3.144280684	3.589428269	3.123842382	-0.197754641	0.372303362	0.507958977	-0.347357154	0.178488647	0.258746142	-0.171811157	0.459833243	0.624645915	-0.32141367	0.211140884	0.335871884	-0.519168311	0.083435312	0.135708155	0.025943484	0.894286516	0.924431005
ENSMUSG00000043716	Rpl7		ribosomal protein L7 [Source:MGI Symbol;Acc:MGI:98073]	7.567530054	7.473764237	7.555309212	7.777669252	7.851595553	7.788739957	6.794393839	6.868156493	6.709667102	6.942171303	7.06993346	7.033453615	0.226619357	0.035184404	0.086255308	0.291533826	0.015973839	0.036212235	0.731085172	1.40352E-05	0.000391519	0.795999642	8.99097E-06	0.000145744	1.022618998	3.18126E-06	3.70134E-05	0.504465816	7.11223E-05	0.000432778
ENSMUSG00000025921	Rdh10	98711	retinol dehydrogenase 10 (all-trans) [Source:MGI Symbol;Acc:MGI:1924238]	3.760347241	3.397918628	3.518363666	2.8585678	2.665636204	2.887375709	4.128502926	4.211776626	4.037591516	3.398861942	3.72713576	3.579297252	-0.544933488	0.003707473	0.015489991	-0.758074769	0.000911812	0.003585737	-0.575056013	0.003700586	0.021930281	-0.788197294	0.000688852	0.003824752	-1.333130782	2.27949E-05	0.000168082	-0.030122525	0.825216311	0.870786555
ENSMUSG00000025920	Stau2	29819	staufen double-stranded RNA binding protein 2 [Source:MGI Symbol;Acc:MGI:1352508]	3.81261422	4.024226894	3.989314716	3.911993003	3.96920806	4.077384629	3.912287616	4.103016073	3.669747788	4.291330317	3.834289265	4.173688162	0.174569295	0.317818717	0.451907637	0.052282644	0.787129888	0.837018402	0.049858213	0.782267267	0.872311516	-0.072428438	0.709094414	0.804798987	0.102140857	0.641890506	0.714114111	-0.124711082	0.421263358	0.513080008
ENSMUSG00000025939	Ube2w	66799	ubiquitin-conjugating enzyme E2W (putative) [Source:MGI Symbol;Acc:MGI:1914049]	4.879058682	4.618948247	4.670481731	4.746315334	4.970376752	5.179513884	4.875610737	4.865190322	4.83967338	5.263715554	5.027783495	5.187022493	0.289189251	0.038112514	0.091776573	0.287168604	0.061037561	0.108168619	-0.143409968	0.291782475	0.465694202	-0.145430614	0.313770207	0.451138037	0.143758636	0.377820189	0.467296836	-0.432599218	0.002210741	0.006695359
ENSMUSG00000079658	Eloc	67923	elongin C [Source:MGI Symbol;Acc:MGI:1915173]	4.322337445	4.536888585	4.483275248	4.754171684	4.992054136	4.928485955	4.675074895	4.6873156	4.691417799	5.237017214	5.20508266	5.288216049	0.551218045	0.000153497	0.001426092	0.462133863	0.001474938	0.005295901	-0.231871098	0.046288442	0.134414514	-0.32095528	0.014006275	0.040587228	0.230262765	0.092172077	0.147297192	-0.783089143	2.11239E-06	3.05362E-05
ENSMUSG00000025940	Tmem70	70397	transmembrane protein 70 [Source:MGI Symbol;Acc:MGI:1915068]	3.951175967	3.985812019	3.845747347	3.517866477	4.008782461	3.905697742	4.483609222	4.6847881	4.158922956	4.091886526	4.237436281	4.088374941	-0.289867067	0.078165542	0.158614623	-0.065312824	0.706413174	0.770823498	-0.512924255	0.007653642	0.037438169	-0.288370011	0.116201481	0.21307695	-0.578237078	0.011523619	0.026047205	-0.223057188	0.122938631	0.185556657
ENSMUSG00000025779	Ly96	17087	lymphocyte antigen 96 [Source:MGI Symbol;Acc:MGI:1341909]	3.070840047	3.434653725	3.258304172	2.576635452	2.820328071	2.756630119	3.503829533	3.447086669	3.617710116	2.76699497	2.819930889	2.833958632	-0.717618984	0.000263364	0.002119249	-0.517004267	0.006616452	0.017517773	-0.264828804	0.092269278	0.214312793	-0.064214088	0.686755756	0.787162621	-0.781833072	0.000937535	0.003278187	0.452790179	0.003472865	0.009726824
ENSMUSG00000091020	Gm5828		predicted gene 5828 [Source:MGI Symbol;Acc:MGI:3644176]	2.461383053	2.582362288	2.896836895	2.93429786	3.214655131	3.164389839	2.432835406	2.383865931	2.636644806	3.101176827	2.695743496	3.292642776	0.49305716	0.034021837	0.084128046	0.482035724	0.062122106	0.109754584	0.161311383	0.468975886	0.632586951	0.150289947	0.531201446	0.659940126	0.643347107	0.031754648	0.060653867	-0.331745777	0.097461251	0.15293479
ENSMUSG00000041859	Mcm3	17215	minichromosome maintenance complex component 3 [Source:MGI Symbol;Acc:MGI:101845]	5.680936548	5.8786802	5.514029156	5.110381915	5.315501605	5.442975499	5.377241279	5.445371923	5.150724653	5.383362934	5.134843759	5.075818292	-0.117638645	0.430502115	0.560920595	-0.385780296	0.034540104	0.067477307	0.387313433	0.026806202	0.091138463	0.119171782	0.472169857	0.607410242	0.001533137	0.993449035	0.994898055	0.504952078	0.002176798	0.00661419
ENSMUSG00000025931	Paqr8	74229	progestin and adipoQ receptor family member VIII [Source:MGI Symbol;Acc:MGI:1921479]	1.086223652	1.347616681	1.008229679	3.540057259	3.732732672	4.393932137	1.804561599	1.76130398	1.873287181	3.677541527	3.311862466	3.622476379	1.697849862	4.3183E-06	9.85055E-05	2.808758343	1.07065E-07	3.69831E-06	-0.666891906	0.009956221	0.045273917	0.444016575	0.082338243	0.163499553	2.141866437	5.17906E-06	5.39337E-05	-2.364741768	5.42498E-08	1.85625E-06
ENSMUSG00000041809	Efhc1	71877	EF-hand domain (C-terminal) containing 1 [Source:MGI Symbol;Acc:MGI:1919127]	0.729481754	0.809100275	0.570810505	-1.03234001	-0.880391683	-0.135845743	0.947789568	0.73462236	1.140963302	0.978657525	-0.186657182	0.495175339	-0.575254938	0.153199	0.263038007	-1.291004943	0.012950471	0.030496105	-0.240764277	0.554894578	0.704367277	-0.956514282	0.051197875	0.1133271	-1.53176922	0.009273564	0.021798368	0.334490661	0.348509157	0.438500969
ENSMUSG00000041779	Tram2		translocating chain-associating membrane protein 2 [Source:MGI Symbol;Acc:MGI:1924817]	4.956516224	5.29301257	5.213237816	6.959069205	6.288555434	6.462985783	5.162646844	5.182359655	5.206051753	5.518300876	5.27352872	5.434696929	0.208352747	0.176272371	0.291006472	1.327759994	4.7365E-06	5.9013E-05	-0.018611665	0.904804387	0.947863497	1.100795582	2.74084E-05	0.000330232	1.309148329	1.86997E-05	0.00014416	-0.226964411	0.10234213	0.159226887
ENSMUSG00000082935	Gm7658		predicted gene 7658 [Source:MGI Symbol;Acc:MGI:3648029]	1.686685281	2.340140777	1.858634148	2.146994375	2.343298683	2.493971928	1.891256259	1.66104266	2.181859975	2.314204993	1.976828125	2.11653315	0.212654246	0.361861009	0.497572319	0.404790432	0.143156283	0.217181073	0.048124916	0.842333097	0.910575995	0.240261102	0.369594536	0.507603292	0.452915348	0.144326451	0.21363698	-0.16452933	0.432717658	0.524639004
ENSMUSG00000026158	Ogfrl1	70155	opioid growth factor receptor-like 1 [Source:MGI Symbol;Acc:MGI:1917405]	7.271942589	7.205189816	7.40197166	7.061577735	7.309230896	7.091234294	8.008927159	7.994151708	8.045001387	8.404941952	8.283946761	8.435984953	0.348089056	0.008223384	0.028605402	-0.0981061	0.421018786	0.516221798	-0.736475102	4.54528E-05	0.000894909	-1.182670259	7.15208E-07	2.7371E-05	-0.834581202	7.29269E-05	0.00042603	-1.084564158	1.71047E-07	4.48336E-06
ENSMUSG00000026155	Smap1	98366	small ArfGAP 1 [Source:MGI Symbol;Acc:MGI:2138261]	5.416694513	5.502084354	5.374791859	5.09785659	5.197158697	5.283244277	5.589391072	5.613559886	5.51008187	5.633358682	5.447286868	5.502650161	-0.045911119	0.645031281	0.748102735	-0.229209931	0.056843441	0.101879639	-0.131710073	0.224169905	0.390295566	-0.315008885	0.013888192	0.040320745	-0.360920004	0.013600558	0.029862329	-0.085798954	0.337588918	0.4270818
ENSMUSG00000026154	Sdhaf4	68002	succinate dehydrogenase complex assembly factor 4 [Source:MGI Symbol;Acc:MGI:1915252]	1.81679986	1.238472775	1.245972683	0.976404065	0.743486523	1.519877633	1.176401639	1.257741911	1.156701469	0.693167687	1.867104544	1.341460022	0.155333297	0.668083787	0.767153245	-0.31563089	0.456654063	0.550774366	0.236242127	0.53898349	0.691371989	-0.234722059	0.57815201	0.698589868	-0.079388763	0.865250949	0.899638214	0.08090883	0.805530806	0.8556686
ENSMUSG00000026153	Fam135a	68187	family with sequence similarity 135, member A [Source:MGI Symbol;Acc:MGI:1915437]	5.129209929	5.317746334	5.243253889	4.791480392	4.961915234	4.89434132	5.428043618	5.381039273	5.479044637	5.372767184	5.185405323	5.285418228	-0.155683602	0.149275244	0.257991003	-0.337898251	0.011786486	0.028264778	-0.190559186	0.099523711	0.225617393	-0.372773835	0.006794954	0.022872668	-0.528457437	0.001650439	0.005237136	-0.034875584	0.702377416	0.771460078
ENSMUSG00000099997	Tubb4b-ps2		tubulin, beta 4B class IVB, pseudogene 2 [Source:MGI Symbol;Acc:MGI:3723458]	0.882354174	0.488373847	0.579569102	0.552443204	0.879279654	0.352421311	0.311047757	0.039871412	0.441107475	0.764897864	0.362178666	0.18073571	0.190390091	0.51735879	0.640565803	-0.072616358	0.830353848	0.870754558	0.403735048	0.205665534	0.368866297	0.140728599	0.679788431	0.782056831	0.33111869	0.38920854	0.478316086	0.213344957	0.428162347	0.52043224
ENSMUSG00000100131	Gm28439		predicted gene 28439 [Source:MGI Symbol;Acc:MGI:5579145]	10.30683321	10.60370732	10.55107083	10.91552334	10.99539578	11.03311872	9.876515269	9.907477132	9.93842629	10.04112119	10.15554806	10.21440086	0.2204174	0.100845503	0.193020905	0.482914168	0.00410875	0.01194366	0.594491404	0.000764176	0.006852761	0.856988172	5.23576E-05	0.000533589	1.077405572	2.37801E-05	0.000173323	0.374074004	0.004967939	0.013026539
ENSMUSG00000067736	Gm10222		predicted gene 10222 [Source:MGI Symbol;Acc:MGI:3642643]	8.061659663	8.146454591	8.12292586	8.594651756	8.569197975	8.673913712	7.543737453	7.567143529	7.525408963	7.880569794	7.708788032	7.843602305	0.255450452	0.02509079	0.066876679	0.493239455	0.000746691	0.003053586	0.570788414	0.000181622	0.002440134	0.808577417	1.15129E-05	0.000172659	1.064027869	3.27231E-06	3.79141E-05	0.315337962	0.003551619	0.009899497
ENSMUSG00000101939	Gm28438		predicted gene 28438 [Source:MGI Symbol;Acc:MGI:5579144]	7.275740986	7.108235372	7.105533009	7.797301971	7.706544313	7.563210733	6.440450542	6.429903524	6.34782763	6.760295578	6.708807541	6.573813858	0.289238762	0.016715684	0.049026023	0.523904139	0.000657014	0.002754144	0.753208935	2.30973E-05	0.000557063	0.987874312	2.5578E-06	6.53178E-05	1.277113074	8.18405E-07	1.42857E-05	0.463970173	0.000292256	0.001301291
ENSMUSG00000101111	Gm28437		predicted gene 28437 [Source:MGI Symbol;Acc:MGI:5579143]	10.4900057	10.56754466	10.60499942	11.04681431	11.10727009	11.03135262	9.865591662	9.939814606	9.811641667	9.891046179	10.01101925	10.00196228	0.094173154	0.401477973	0.535869716	0.51049954	0.00115458	0.00433615	0.682455342	8.63545E-05	0.001418011	1.098781728	1.47853E-06	4.44583E-05	1.192954882	2.62739E-06	3.21867E-05	0.588282188	6.02643E-05	0.000380024
ENSMUSG00000100862	Gm10925		predicted gene 10925 [Source:MGI Symbol;Acc:MGI:3809095]	10.90514129	11.06653546	11.0463668	11.41930724	11.51597632	11.49061463	10.29954249	10.32110588	10.32557366	10.44015564	10.53463145	10.54757195	0.188543857	0.114900448	0.212429735	0.469473729	0.002389235	0.007807869	0.698405392	8.4273E-05	0.001393715	0.979335264	5.49904E-06	0.000104935	1.167879121	3.92706E-06	4.36438E-05	0.509861535	0.000240436	0.001121606
ENSMUSG00000102070	Gm28661		predicted gene 28661 [Source:MGI Symbol;Acc:MGI:5579367]	10.29294607	10.3998649	10.40232586	10.83173339	10.84651014	10.80904431	9.6245763	9.649995286	9.641865428	9.683358649	9.820194102	9.793539489	0.126287084	0.255755529	0.384339803	0.458533257	0.002075727	0.00698885	0.729806174	3.87296E-05	0.000797593	1.062052347	1.62992E-06	4.72863E-05	1.188339431	2.1565E-06	2.77133E-05	0.60351909	3.88032E-05	0.000272387
ENSMUSG00000101249	Gm29216		predicted gene 29216 [Source:MGI Symbol;Acc:MGI:5579922]	10.89532898	11.03048582	11.03808153	11.33638568	11.48796861	11.37368638	10.1971177	10.25454831	10.15614947	10.24279608	10.33104269	10.32915242	0.09685285	0.399989116	0.53444456	0.420057399	0.005036009	0.014110576	0.791529921	2.89714E-05	0.000652302	1.11473447	1.63633E-06	4.73291E-05	1.21158732	2.87453E-06	3.44517E-05	0.694677071	1.68427E-05	0.000146365
ENSMUSG00000073725	Lmbrd1	68421	LMBR1 domain containing 1 [Source:MGI Symbol;Acc:MGI:1915671]	6.724570434	6.750855016	6.738470486	6.749194354	7.040661522	7.008552797	7.058622561	7.071810159	6.9988225	7.258109196	7.029600996	7.162401225	0.099926573	0.359274547	0.495013651	0.227864783	0.070050986	0.120872972	-0.300268863	0.01932745	0.072605986	-0.172330653	0.158683057	0.271495979	-0.07240408	0.59221738	0.670354543	-0.400195436	0.001042968	0.003613195
ENSMUSG00000099492	Gm5525		predicted gene 5525 [Source:MGI Symbol;Acc:MGI:3646042]	2.961758109	2.859469152	2.926135796	3.588266069	3.389851779	3.550320873	2.41346077	2.498778673	2.275718023	2.832786997	2.470963452	2.678278239	0.246348854	0.128753614	0.23156981	0.581610063	0.005905108	0.016031613	0.519413177	0.00732889	0.03621056	0.854674385	0.000406919	0.002543726	1.101023239	0.000135213	0.000686001	0.273064322	0.067809636	0.113577461
ENSMUSG00000100261	Gm6473		predicted gene 6473 [Source:MGI Symbol;Acc:MGI:3645176]	1.876827438	1.850094038	1.888254124	1.174724263	1.154887288	1.064043002	1.638323862	1.598171478	1.757948283	0.974411157	1.561377542	1.287717899	-0.364240841	0.106490266	0.200676167	-0.751594547	0.009499299	0.023666474	0.205680784	0.367772531	0.542539663	-0.181672922	0.464882218	0.600478268	-0.545913763	0.066609981	0.112792035	0.569921625	0.011475707	0.02577118
ENSMUSG00000048874	Phf3	213109	PHD finger protein 3 [Source:MGI Symbol;Acc:MGI:2446126]	5.974076642	5.851171769	5.862760713	5.631456044	5.63765701	5.696616065	6.239531747	6.22586613	6.241287766	5.756263745	5.795023717	5.760533314	-0.461433748	0.000160455	0.001473034	-0.232073167	0.026813826	0.055046204	-0.344965285	0.002185836	0.014929022	-0.115604704	0.229974982	0.358444122	-0.577038452	0.000176158	0.000845899	0.116468463	0.135547336	0.201500652
ENSMUSG00000026064	Ptp4a1	19243	protein tyrosine phosphatase 4a1 [Source:MGI Symbol;Acc:MGI:1277096]	3.834655172	3.976992659	3.689658615	4.400592537	4.331219991	4.669479553	3.852800488	3.792331039	3.897461565	4.396272953	4.315936928	4.284774911	0.488112503	0.001979072	0.009556228	0.641444891	0.000671646	0.002797753	-0.009175049	0.944047738	0.970943703	0.144157339	0.31584848	0.453422247	0.632269842	0.001823069	0.005687418	-0.497287552	0.000776012	0.002851349
ENSMUSG00000117310	Ptp4a1	19243	protein tyrosine phosphatase 4a1 [Source:MGI Symbol;Acc:MGI:1277096]	3.78075638	3.909342381	3.660771565	4.216819651	4.279596677	4.5925971	3.823175541	3.730716841	3.897183615	4.349657534	4.085291192	4.177477525	0.38076933	0.015894607	0.047147613	0.602378712	0.002174079	0.007258426	-0.028434367	0.844017382	0.911607019	0.193175015	0.229021819	0.357386921	0.573944345	0.006467527	0.016203226	-0.409203697	0.005738212	0.014577861
ENSMUSG00000070960	Gm19680		predicted gene, 19680 [Source:MGI Symbol;Acc:MGI:5011865]	3.292097815	2.885922965	3.181181059	2.125887009	2.805595614	2.478497384	2.904402054	2.945807178	2.789260552	3.120839292	3.042803904	3.118464666	0.210593309	0.224943205	0.350202155	-0.586929165	0.009313209	0.023286375	0.238607667	0.194951893	0.355930043	-0.558914807	0.012255198	0.036660036	-0.348321498	0.12588257	0.190954429	0.028014358	0.852498532	0.891986865
ENSMUSG00000100481	Gm7114		predicted gene 7114 [Source:MGI Symbol;Acc:MGI:3643085]	0.946189068	0.235323533	1.110188859	-0.826488049	0.337601038	0.371064606	0.591168115	0.593616264	0.672236224	0.283943384	-0.600602404	0.508039794	-0.654115022	0.146172658	0.254169747	-0.697762973	0.179016135	0.259246221	0.174879546	0.699288032	0.814019553	0.131231594	0.792818503	0.865860305	-0.522883427	0.35595745	0.445211209	0.828994568	0.052244101	0.09136141
ENSMUSG00000026134	Prim2	19076	DNA primase, p58 subunit [Source:MGI Symbol;Acc:MGI:97758]	2.801682827	2.9002603	2.949361017	2.199104872	2.56321169	2.524237808	3.000027273	2.951906461	3.076532675	3.255502246	2.920421321	3.219391905	0.097370922	0.529023976	0.65002663	-0.416872626	0.032576517	0.064383693	-0.123852536	0.449952008	0.616686395	-0.638096084	0.003287043	0.013069148	-0.540725162	0.016909566	0.035765483	-0.221223458	0.128426323	0.192521688
ENSMUSG00000004768	Rab23	19335	RAB23, member RAS oncogene family [Source:MGI Symbol;Acc:MGI:99833]	3.456925325	3.475744016	3.426943616	3.170187595	2.968166214	2.986728483	3.442976991	3.324802261	3.509277757	3.268794285	2.716785439	2.887221391	-0.481422339	0.015896877	0.047147613	-0.434002279	0.045379859	0.084461014	0.032689642	0.857982221	0.918524497	0.080109702	0.685464521	0.786201547	-0.401312637	0.091396321	0.146326805	0.514111981	0.006074679	0.015304577
ENSMUSG00000042215	Bag2	213539	BCL2-associated athanogene 2 [Source:MGI Symbol;Acc:MGI:1891254]	-0.081571341	0.566055005	0.296299316	0.214359391	0.938198559	-0.113446999	0.489494925	1.021587911	-0.257907805	0.236151208	0.47680723	0.125720476	-0.112723769	0.77289702	0.84552575	0.087286358	0.847365248	0.883643366	-0.1754717	0.670762738	0.794242613	0.024538427	0.956944586	0.973482292	-0.088185342	0.861672376	0.897058801	-0.06274793	0.859835919	0.897973281
ENSMUSG00000042197	Zfp451	98403	zinc finger protein 451 [Source:MGI Symbol;Acc:MGI:2137896]	5.747462725	5.829251999	6.017787942	6.493628963	6.607736928	6.635656775	6.220371103	6.317139523	6.246475609	6.518533445	6.624607923	6.82854183	0.374647587	0.008266701	0.028710253	0.72939713	0.000134827	0.000774935	-0.407499656	0.006815606	0.034330096	-0.052750113	0.687764131	0.787976054	0.321897474	0.050875748	0.089850736	-0.782147243	9.54313E-06	9.63468E-05
ENSMUSG00000081402	Gm15455		predicted gene 15455 [Source:MGI Symbol;Acc:MGI:3705563]	0.944214059	1.200434154	0.701127736	0.63343746	0.449363808	0.605444696	0.931409811	0.407251927	1.520996025	0.803705203	0.945313395	0.552623393	-0.145137324	0.641305794	0.74515056	-0.373984138	0.311358033	0.405188364	-0.013776394	0.966399561	0.982021995	-0.242623209	0.506483172	0.63872666	-0.387760533	0.345319461	0.434566351	0.13136093	0.643530292	0.72107782
ENSMUSG00000042182	Bend6	320705	BEN domain containing 6 [Source:MGI Symbol;Acc:MGI:2444572]	4.049151174	4.46244882	4.301698017	3.660922277	3.762385697	3.756179632	4.040104908	3.966127382	4.204127752	4.467528771	4.467535917	4.541755106	0.414280323	0.007550054	0.026827001	-0.543553981	0.00298507	0.009327168	0.208566376	0.147741799	0.295441065	-0.749267928	0.000284859	0.001938886	-0.334987605	0.063414311	0.108025948	-0.205713947	0.096868122	0.152210378
ENSMUSG00000026131	Dst	13518	dystonin [Source:MGI Symbol;Acc:MGI:104627]	8.092922263	7.858593448	8.326904296	10.61272035	9.26829309	9.191402864	8.299604019	8.163711243	8.66880772	8.926911627	9.072060079	9.106014925	0.645071602	0.026339543	0.06928781	1.466908768	0.000226084	0.001162384	-0.33086819	0.236008761	0.40338242	0.490968976	0.100855097	0.191456546	1.136040578	0.004198452	0.011327421	-0.975939792	0.000941122	0.003325889
ENSMUSG00000103364	Gm38157		predicted gene, 38157 [Source:MGI Symbol;Acc:MGI:5611385]	-0.150280782	0.076556734	0.098408041	3.491686197	3.103064561	2.219080274	1.785277314	1.662535062	1.883580114	3.208232817	3.389175611	2.969604536	1.447929952	9.3869E-05	0.000979735	2.816640083	6.80891E-07	1.41813E-05	-1.763537752	2.68784E-05	0.000620257	-0.394827622	0.185169088	0.305180801	1.05310233	0.006334644	0.015933529	-3.211467705	1.49961E-08	7.63096E-07
ENSMUSG00000101462	Gm3052		predicted gene 3052 [Source:MGI Symbol;Acc:MGI:3781230]	1.132161116	-0.268539198	0.08572406	-0.536580806	-0.51054994	-1.361429007	0.603746538	-0.170314158	1.129021479	0.592218341	0.330701592	-0.491524679	-0.293685009	0.570937667	0.686350474	-1.214272189	0.061777919	0.109243744	-0.156991987	0.772615579	0.865748408	-1.077579167	0.09296999	0.179380431	-1.371264176	0.059295344	0.102291903	0.136693022	0.770810305	0.827616173
ENSMUSG00000102336	Gm37233		predicted gene, 37233 [Source:MGI Symbol;Acc:MGI:5610461]	3.817210049	4.113228879	3.686146101	3.330749331	2.876867652	3.315163629	3.864778084	3.64205886	4.125599235	4.297783153	4.210123381	4.102242622	0.335325441	0.075098575	0.153783815	-0.731251362	0.003029745	0.00943592	0.002751234	0.988080068	0.994307012	-1.063825569	0.000187087	0.001402598	-0.728500128	0.006660821	0.016621543	-0.332574207	0.052025536	0.091047965
ENSMUSG00000042111	Ccdc115	69668	coiled-coil domain containing 115 [Source:MGI Symbol;Acc:MGI:1916918]	4.769924309	4.749551058	4.64675529	4.58894782	4.500681178	4.747523957	4.699919144	4.594311526	4.811129212	4.853373673	4.682764723	4.745012238	0.054720742	0.621685669	0.728602424	-0.108050657	0.391808814	0.486939349	0.02213724	0.849185976	0.91435423	-0.140634159	0.271009212	0.405433984	-0.085913417	0.544944411	0.627413207	-0.032583502	0.740599936	0.803092211
ENSMUSG00000026127	Imp4		IMP4, U3 small nucleolar ribonucleoprotein [Source:MGI Symbol;Acc:MGI:106572]	5.527562974	5.69667301	5.573522795	6.03620888	6.001862172	6.129287338	5.664025843	5.729021655	5.561119	6.240756878	6.021350986	6.130843197	0.471628536	0.00088822	0.005244011	0.444253918	0.002691021	0.00858605	-0.039973948	0.723680767	0.832383248	-0.067348566	0.571384242	0.693329927	0.40427997	0.010914717	0.024934591	-0.511602484	0.00016679	0.000840728
ENSMUSG00000026126	Ptpn18	19253	protein tyrosine phosphatase, non-receptor type 18 [Source:MGI Symbol;Acc:MGI:108410]	4.925213538	4.716656367	4.52888353	3.630635057	3.646074794	3.765002597	4.526346739	4.493466673	4.439346675	3.747220048	3.831628509	3.55012808	-0.750022762	0.000152657	0.001422337	-1.029268943	2.82111E-05	0.000230806	0.238578143	0.117554112	0.252366207	-0.040668038	0.79225936	0.86539291	-0.7906908	0.000715098	0.002624609	0.988600905	4.57331E-06	5.51496E-05
ENSMUSG00000100280	Gm28417		predicted gene 28417 [Source:MGI Symbol;Acc:MGI:5579123]	2.7156788	2.928894766	2.788443313	-0.416558437	-0.006764397	-1.071459708	2.201694861	1.998622179	2.290876354	1.016760467	1.041734895	0.576000322	-1.242120795	0.000387306	0.002819942	-3.34662982	1.50348E-07	4.61066E-06	0.6524062	0.029658382	0.097610578	-1.452102825	0.000357303	0.002308679	-2.69422362	3.99272E-06	4.42672E-05	1.894526995	3.91383E-06	4.86323E-05
ENSMUSG00000037509	Arhgef4	226970	Rho guanine nucleotide exchange factor (GEF) 4 [Source:MGI Symbol;Acc:MGI:2442507]	3.111093325	3.45977657	3.65902018	1.79568845	1.627562136	1.881567611	3.411396148	3.477618449	3.676924299	1.98497929	2.619120117	2.842572742	-1.064262111	0.001228082	0.006685157	-1.652799769	0.000106372	0.000642015	-0.121772956	0.649177092	0.777579597	-0.710310613	0.028278731	0.071129483	-1.774572724	0.000160192	0.000785248	0.942489155	0.001365578	0.004506888
ENSMUSG00000104002	Gm38336		predicted gene, 38336 [Source:MGI Symbol;Acc:MGI:5611564]	0.769757419	-2.974715304	-0.298014737	-0.374039017	-0.17158025	-0.704208749	0.162213473	-0.091859385	0.390425541	0.176981409	0.318492341	0.539899899	0.184186638	0.817319188	0.876907489	0.301026319	0.74501306	0.803086544	-0.887700776	0.302603804	0.476996714	-0.770861095	0.412638777	0.55150608	-0.586674457	0.572512725	0.652394945	-1.071887414	0.158234611	0.229898693
ENSMUSG00000037503	Fam168b	214469	family with sequence similarity 168, member B [Source:MGI Symbol;Acc:MGI:2448487]	7.477671477	7.493805889	7.450395503	7.332288433	7.471476461	7.45036789	7.739718606	7.769584697	7.65702626	7.781464617	7.67941439	7.70227655	-0.000504664	0.995693397	0.997344629	-0.041895556	0.680791582	0.749647801	-0.242620762	0.028049248	0.093961937	-0.284011653	0.015699196	0.044508823	-0.284516317	0.030604281	0.058804243	-0.242116098	0.010935379	0.024798284
ENSMUSG00000026123	Plekhb2	226971	pleckstrin homology domain containing, family B (evectins) member 2 [Source:MGI Symbol;Acc:MGI:2385825]	6.334083195	6.35166394	6.269102762	6.275720228	6.500482499	6.60677446	6.099980948	6.061869897	6.144123431	6.191069716	6.20449545	6.21372007	0.101187863	0.286386616	0.4180396	0.168258309	0.116995833	0.183878959	0.220253394	0.040768362	0.122880034	0.28732384	0.014466154	0.041581588	0.388511703	0.005802381	0.014801079	0.119065531	0.159234741	0.231003449
ENSMUSG00000045216	Hs6st1	50785	heparan sulfate 6-O-sulfotransferase 1 [Source:MGI Symbol;Acc:MGI:1354958]	7.204879737	7.246931879	7.369452077	8.181447935	7.940539347	8.108093161	7.457418817	7.546080646	7.43947821	7.373832573	7.257730344	7.484473549	-0.129791524	0.259463884	0.38845482	0.777090487	4.09473E-05	0.000305828	-0.215882061	0.086285964	0.2045886	0.69099995	0.000117558	0.000984395	0.561208426	0.001777651	0.005571548	-0.086090537	0.382516419	0.473611238
ENSMUSG00000037470	Uggt1	320011	UDP-glucose glycoprotein glucosyltransferase 1 [Source:MGI Symbol;Acc:MGI:2443162]	7.805559024	7.773042833	7.850081485	7.63663586	8.074698053	7.941179046	7.696384546	7.712423036	7.661181765	7.755815522	7.668322823	7.775162944	0.037056972	0.733800027	0.818134027	0.132435985	0.274639146	0.366044998	0.115114608	0.324022966	0.49938995	0.21049362	0.09599723	0.184020081	0.247550592	0.090322703	0.144891799	0.078057635	0.414509766	0.50587452
ENSMUSG00000047180	Neurl3	214854	neuralized E3 ubiquitin protein ligase 3 [Source:MGI Symbol;Acc:MGI:2429944]	6.451389461	6.493949526	6.338850135	7.163005286	7.185570774	7.247127561	5.511828775	5.527018714	5.446983326	6.375797142	6.457611401	6.323193413	0.901734435	8.48706E-07	2.91402E-05	0.766806558	9.69674E-06	9.92683E-05	0.942992815	9.00321E-07	5.60864E-05	0.808064939	6.02607E-06	0.00011147	1.709799374	1.27208E-08	6.71928E-07	0.04125838	0.614858352	0.695571029
ENSMUSG00000037447	Arid5a	214855	AT rich interactive domain 5A (MRF1-like) [Source:MGI Symbol;Acc:MGI:2443039]	5.20239717	4.965250187	5.191278066	8.476705142	8.552367113	8.592077412	4.980932091	4.884338557	5.175133989	9.093890726	9.112279212	9.249976363	4.126677932	1.22422E-12	1.38824E-09	3.454455155	2.09489E-11	2.24345E-08	0.078132297	0.539847604	0.692224748	-0.594090481	0.000727578	0.003993328	3.532587452	7.89198E-11	3.06807E-08	-4.048545636	3.2193E-13	6.38893E-10
ENSMUSG00000010453	Kansl3	226976	KAT8 regulatory NSL complex subunit 3 [Source:MGI Symbol;Acc:MGI:1918055]	5.721552987	5.764496725	5.976420117	6.73769253	6.621944655	6.478042495	5.923656126	6.019058688	5.913418945	6.550356486	6.704903563	6.77439727	0.714149974	5.24068E-05	0.000620132	0.778914997	5.44838E-05	0.000384133	-0.142560374	0.251642121	0.420675536	-0.077795351	0.539542591	0.667140692	0.636354623	0.000889417	0.003141568	-0.856710348	2.72944E-06	3.71375E-05
ENSMUSG00000037432	Fer1l5	100534273	fer-1-like 5 (C. elegans) [Source:MGI Symbol;Acc:MGI:3616091]	1.46601236	1.3217096	1.660266242	2.943647436	1.527268636	2.554494097	0.899945812	0.823726506	1.345440173	2.542432844	2.989053381	3.296997528	1.889400449	5.62202E-05	0.00065061	0.766553675	0.04734726	0.087524701	0.451391964	0.180486949	0.33791438	-0.671454809	0.076512363	0.154605055	1.217945639	0.00905026	0.021385646	-1.438008484	0.000243934	0.001132599
ENSMUSG00000001143	Lman2l	214895	lectin, mannose-binding 2-like [Source:MGI Symbol;Acc:MGI:2443010]	6.427924136	6.438373443	6.343833395	5.690684216	5.95481159	5.945502206	6.352056866	6.277009016	6.369120267	6.187671396	5.948677864	6.006792072	-0.28523507	0.020309727	0.056814888	-0.511429571	0.001007553	0.003892979	0.079370096	0.488708134	0.65036243	-0.146824405	0.230123849	0.358545884	-0.432059475	0.007670966	0.018643291	0.364605166	0.002216847	0.006710927
ENSMUSG00000037408	Cnnm4	94220	cyclin M4 [Source:MGI Symbol;Acc:MGI:2151060]	5.486106172	5.725706336	5.592303366	5.976645775	6.269317273	6.502774273	5.542147005	5.568660863	5.53484066	6.495562222	6.231867062	6.487803217	0.836783755	5.14505E-05	0.000611943	0.67263035	0.000683222	0.002838315	0.066971841	0.636689322	0.768786446	-0.097181564	0.514284623	0.645038099	0.739602191	0.000943416	0.003293777	-0.769811914	3.33054E-05	0.000243452
ENSMUSG00000104316	Gm37909		predicted gene, 37909 [Source:MGI Symbol;Acc:MGI:5611137]	0.458045625	0.877856435	0.7416394	-0.709211865	-0.030214577	0.545744441	0.41678693	1.196092175	-0.278623354	-0.34760867	0.764718242	0.832788489	-0.036567995	0.939003762	0.960223795	-0.616879252	0.280175802	0.372080096	0.219014201	0.665180751	0.790545897	-0.361297055	0.520828138	0.650601968	-0.39786505	0.525050101	0.608848331	0.255582197	0.560278771	0.644780114
ENSMUSG00000001138	Cnnm3	94218	cyclin M3 [Source:MGI Symbol;Acc:MGI:2151055]	5.995549595	6.040609633	5.888384165	4.794677104	5.211320705	5.118317574	6.258060424	6.193895729	6.24219988	5.802694886	5.677328561	5.631418425	-0.519561764	0.000460927	0.003218826	-0.891643199	1.00964E-05	0.000102528	-0.244689578	0.050386974	0.142503226	-0.616771013	0.000260358	0.001812072	-1.136332778	3.67455E-06	4.16029E-05	0.274872186	0.01295968	0.028437193
ENSMUSG00000067653	Ankrd23	78321	ankyrin repeat domain 23 [Source:MGI Symbol;Acc:MGI:1925571]	2.345577222	2.188495179	2.394140968	1.81087961	1.600987116	1.823758849	1.953566992	1.796249251	2.321040708	1.872811598	2.408373038	2.369886657	0.197280091	0.373259447	0.508703728	-0.575047177	0.037905019	0.072741611	0.2822596	0.235011343	0.402313934	-0.490067667	0.069693789	0.143989607	-0.292787576	0.307864425	0.395382508	0.08497951	0.666560321	0.740729221
ENSMUSG00000109510	Gm42417		predicted gene, 42417 [Source:MGI Symbol;Acc:MGI:5649003]	2.224521637	1.912857291	2.349469337	1.748858765	1.477643903	1.333988023	1.721092869	1.414655456	2.218710651	1.953624178	2.088984153	2.182230552	0.283895176	0.232455248	0.358409356	-0.691825705	0.021506654	0.046053787	0.383618822	0.134591367	0.277319978	-0.592102059	0.042715048	0.098423858	-0.308206883	0.310376612	0.398130368	0.099723646	0.633307142	0.711689275
ENSMUSG00000079610	Ankrd39		ankyrin repeat domain 39 [Source:MGI Symbol;Acc:MGI:1914816]	3.364320043	2.908964336	3.048804492	2.199848599	2.161525025	2.324812351	2.71428681	2.559708838	2.823472068	3.143538616	2.832430913	2.924658274	0.263143972	0.147451845	0.25553905	-0.867013762	0.000893782	0.003535427	0.408186826	0.042788479	0.127284273	-0.721970908	0.003226438	0.012883495	-0.458826936	0.057990652	0.100412083	0.145042854	0.359812649	0.449952049
ENSMUSG00000026121	Sema4c	20353	sema domain, immunoglobulin domain (Ig), transmembrane domain (TM) and short cytoplasmic domain, (semaphorin) 4C [Source:MGI Symbol;Acc:MGI:109252]	7.024115089	7.166971436	7.239378979	9.238792151	8.195776552	8.451292971	6.777627102	6.790511362	6.911084774	9.206854803	9.217770729	9.295956319	2.399582536	1.80083E-08	1.43776E-06	1.352496989	1.24669E-05	0.000122137	0.314134491	0.100495602	0.22696877	-0.732951055	0.001974998	0.008764043	1.666631481	6.92882E-06	6.7509E-05	-2.085448045	1.7413E-08	8.48776E-07
ENSMUSG00000087589	D430040D24Rik		RIKEN cDNA D430040D24 gene [Source:MGI Symbol;Acc:MGI:2442526]	2.178148402	2.773446191	2.335440484	2.032100055	1.351242073	2.185929694	2.347274332	2.337796423	2.512068217	3.388013086	3.430569551	3.576005836	1.049262809	0.000437153	0.003100016	-0.602457285	0.029952706	0.060107502	0.026875168	0.90659044	0.948727261	-1.624844925	3.3297E-05	0.000380396	-0.575582117	0.058269145	0.100756157	-1.022387641	0.000229948	0.001085807
ENSMUSG00000061518	Cox5b		cytochrome c oxidase subunit 5B [Source:MGI Symbol;Acc:MGI:88475]	4.404962248	4.005422467	4.215811841	4.476997725	4.297690134	4.356884808	3.958518824	4.149988022	3.659332866	4.027796488	3.917490286	3.95753922	0.042001108	0.784060869	0.853484845	0.159260516	0.367057721	0.462425488	0.27860055	0.105286757	0.23435749	0.395859957	0.039472451	0.092486303	0.437861065	0.043012951	0.078099345	0.236599442	0.104677588	0.162333228
ENSMUSG00000037351	Actr1b	226977	ARP1 actin-related protein 1B, centractin beta [Source:MGI Symbol;Acc:MGI:1917446]	5.949236162	5.900403562	6.01466514	6.590546626	6.446992688	6.371689023	5.958736198	5.960817296	5.996831598	6.522996444	6.610620259	6.601456674	0.604989959	2.70294E-05	0.000384333	0.502448427	0.000291683	0.001422774	-0.02607194	0.783724503	0.873095493	-0.128613472	0.210276513	0.334968991	0.476376487	0.001278474	0.004245978	-0.631061899	5.15289E-06	6.02052E-05
ENSMUSG00000026116	Tmem131	56030	transmembrane protein 131 [Source:MGI Symbol;Acc:MGI:1927110]	7.916136193	8.000797082	7.992786336	8.436784591	8.104124977	8.042334567	7.636941593	7.633072617	7.638771275	7.759348794	7.695173349	7.669880645	0.073033704	0.49008262	0.616702308	0.177134269	0.13849543	0.2112869	0.339960903	0.008969714	0.041927075	0.444061468	0.002128546	0.009281902	0.517095172	0.001989572	0.006129769	0.266927199	0.011828241	0.026383739
ENSMUSG00000103159	F830112A20Rik		RIKEN cDNA F830112A20 gene [Source:MGI Symbol;Acc:MGI:3641781]	-1.894389767	-1.636061316	-1.123978011	1.237677132	1.208405923	-1.016014702	-0.726163786	-2.240048896	1.184974909	0.361273354	0.284514556	-0.055816415	0.833511266	0.298985142	0.432116271	1.819809091	0.064446114	0.113081462	-0.9253384	0.275437996	0.446538061	0.060959425	0.946511271	0.966633981	0.894470691	0.385669629	0.474755577	-1.758849666	0.027935747	0.053908641
ENSMUSG00000026113	Inpp4a	269180	inositol polyphosphate-4-phosphatase, type I [Source:MGI Symbol;Acc:MGI:1931123]	5.090743527	5.143978401	5.206600397	5.783793052	5.1837875	5.178903903	5.259670094	5.166956093	5.428250496	4.934260182	4.928949155	4.914144448	-0.360372394	0.014220334	0.043293641	0.162691448	0.265264602	0.355837761	-0.138544271	0.311856991	0.486340068	0.384519571	0.01815956	0.050103796	0.024147177	0.881076711	0.911522019	0.221828123	0.06855766	0.114691912
ENSMUSG00000026112	Coa5	76178	cytochrome C oxidase assembly factor 5 [Source:MGI Symbol;Acc:MGI:1923428]	6.765793985	6.842082349	6.695962614	6.513331894	6.753688698	6.657415615	6.316368793	6.30602947	6.220141662	6.334079247	6.131696661	6.108169666	-0.082885994	0.449117205	0.578823288	-0.108227305	0.368231918	0.463568446	0.50349444	0.000854162	0.007420904	0.47815313	0.001657853	0.007556066	0.395267136	0.012688855	0.028190241	0.586380435	5.29112E-05	0.000345785
ENSMUSG00000026111	Unc50	67387	unc-50 homolog [Source:MGI Symbol;Acc:MGI:1914637]	5.096936113	5.091168053	4.823392612	3.890692405	4.292992148	4.280957405	5.09661663	5.070485728	4.974588165	4.628362609	4.487583598	4.340313551	-0.54526307	0.001566364	0.008077182	-0.802749579	0.000199336	0.001053721	-0.034307057	0.808215267	0.888972802	-0.291793566	0.073116441	0.149643872	-0.837056636	0.000393846	0.001618251	0.510956013	0.001087352	0.003746401
ENSMUSG00000026110	Mgat4a	269181	mannoside acetylglucosaminyltransferase 4, isoenzyme A [Source:MGI Symbol;Acc:MGI:2662992]	8.858948855	9.007278708	9.040780727	9.460744134	9.331676793	9.410314524	9.136487434	9.1768429	9.173347759	9.326255842	9.342118287	9.448125709	0.197997192	0.085696134	0.170459722	0.408470486	0.00429073	0.012374262	-0.190593625	0.111230582	0.242805663	0.019879669	0.865235023	0.91381106	0.217876861	0.126434503	0.191603373	-0.388590817	0.001323643	0.0043959
ENSMUSG00000103948	4930594C11Rik	77633	RIKEN cDNA 4930594C11 gene [Source:MGI Symbol;Acc:MGI:1924883]	0.770156064	-0.132080307	0.882124702	1.724737116	0.863603761	1.425414722	1.723595865	1.633778437	2.204363236	0.668261847	1.594307703	1.821476655	-0.508426804	0.223924578	0.349013827	0.744075757	0.132589583	0.203753815	-1.322058128	0.008875088	0.041610775	-0.069555567	0.882251734	0.924929522	-0.577982371	0.282588589	0.369103282	-0.813631323	0.044634676	0.079987735
ENSMUSG00000026090	2010300C02Rik	72097	RIKEN cDNA 2010300C02 gene [Source:MGI Symbol;Acc:MGI:1919347]	-0.207596001	-0.497929267	-1.061121432	1.172705621	-0.044830245	0.705534163	0.450206902	0.268298461	0.436577258	1.347722358	1.31570063	0.657668191	0.781459112	0.053661686	0.119122426	1.142739264	0.019995507	0.043314763	-0.978054455	0.026301611	0.090045871	-0.616774303	0.17153763	0.288219733	0.164684809	0.732235792	0.790873863	-1.759513566	0.000237549	0.001112619
ENSMUSG00000060771	Tsga10	211484	testis specific 10 [Source:MGI Symbol;Acc:MGI:2685063]	3.958320114	3.418796337	3.902131265	3.376827199	3.923113211	3.894588082	4.085701048	4.11803796	4.116881748	3.783642664	3.899128213	4.133304533	-0.186465866	0.320728673	0.455299686	0.043159458	0.8357826	0.874760181	-0.360029581	0.08356429	0.200185397	-0.130404257	0.534952407	0.663354355	-0.316870123	0.19521188	0.272907662	-0.173563715	0.302940252	0.392066888
ENSMUSG00000037216	Lipt1	623661	lipoyltransferase 1 [Source:MGI Symbol;Acc:MGI:3645211]	-0.138752354	0.794713358	0.287747084	0.469386866	0.874711569	-0.481768705	0.301001748	0.205627777	0.219683746	0.718672655	0.237365313	-0.090468193	0.071773911	0.856619689	0.905372742	-0.08112749	0.860492225	0.893687051	0.057911592	0.889990512	0.938061085	-0.094989809	0.837502385	0.89476145	-0.023215898	0.964039862	0.973146473	-0.013862319	0.969413817	0.977931649
ENSMUSG00000026088	Mitd1	69028	MIT, microtubule interacting and transport, domain containing 1 [Source:MGI Symbol;Acc:MGI:1916278]	3.049873227	3.09665407	3.020065736	2.886834544	3.203458451	2.969802525	2.657036229	2.915426513	2.316109845	2.403568078	2.920352975	2.589522947	0.035590004	0.861643553	0.908656321	-0.013298934	0.954404834	0.966286055	0.423888452	0.06924883	0.176126831	0.374999514	0.127734033	0.22935003	0.410589518	0.13732756	0.205228344	0.388298448	0.053229178	0.092792037
ENSMUSG00000026087	Mrpl30	107734	mitochondrial ribosomal protein L30 [Source:MGI Symbol;Acc:MGI:1333820]	3.676305828	3.831259461	3.648561749	3.748691611	3.625918702	4.043255549	3.364673071	3.579669778	3.131801621	3.242196857	3.323691284	3.364751406	-0.054363994	0.719125677	0.806498257	0.095940991	0.577919038	0.659475216	0.357702075	0.041916679	0.125416005	0.508007059	0.011431406	0.034681174	0.453643065	0.035141921	0.066070046	0.412066069	0.009767979	0.022593533
ENSMUSG00000058407	Txndc9	98258	thioredoxin domain containing 9 [Source:MGI Symbol;Acc:MGI:2138153]	5.124715821	5.127109904	4.978177663	5.247695374	5.302358473	5.323994188	5.104399966	4.820886956	5.416021726	5.644465827	5.603177489	5.495520212	0.478698135	0.005230129	0.020188096	0.220176693	0.180011167	0.260395744	-0.030336673	0.838655012	0.90828685	-0.288858116	0.087195776	0.170729206	0.189840019	0.301941466	0.389654466	-0.509034808	0.001559453	0.005031101
ENSMUSG00000026083	Eif5b	226982	eukaryotic translation initiation factor 5B [Source:MGI Symbol;Acc:MGI:2441772]	5.581482078	5.405785469	5.502747647	6.26742577	5.978442753	6.096116685	5.507077741	5.533168771	5.540513362	5.336136932	5.693411922	5.553615956	0.008933645	0.943433164	0.963193467	0.596135034	0.001122819	0.004238643	-0.043841982	0.741843745	0.845213918	0.543359407	0.002166964	0.009419758	0.552293052	0.004636849	0.0122789	-0.052775627	0.636091318	0.714067118
ENSMUSG00000026082	Rev1	56210	REV1, DNA directed polymerase [Source:MGI Symbol;Acc:MGI:1929074]	4.092111236	3.860543198	4.130875929	3.697217027	3.594077707	3.494388928	3.999199092	3.946531559	4.097643525	3.729795508	3.689316758	3.790207363	-0.286384028	0.033581301	0.083290739	-0.446991528	0.00659231	0.01745718	0.008866218	0.944501331	0.970952818	-0.151741282	0.28150919	0.41661081	-0.43812531	0.014500702	0.031477282	0.295250246	0.017472654	0.03649528
ENSMUSG00000026080	Chst10	98388	carbohydrate sulfotransferase 10 [Source:MGI Symbol;Acc:MGI:2138283]	4.213040981	4.199456635	3.809457889	2.623871917	3.001851788	3.103068881	4.126207525	4.121980655	3.942293379	3.981125755	3.866211759	3.624293689	-0.215286229	0.213957208	0.337249204	-1.111898339	8.8662E-05	0.000557261	0.017573388	0.920557007	0.957142275	-0.879038722	0.000608217	0.003487142	-1.094324951	0.000280523	0.001230898	0.232859617	0.139518469	0.206438291
ENSMUSG00000026078	Pdcl3		phosducin-like 3 [Source:MGI Symbol;Acc:MGI:1916083]	4.794946591	4.349939709	4.495647791	4.737734504	4.719192111	4.777781312	4.679040986	4.646484584	4.654774601	4.660946983	4.664186884	4.599847732	-0.010412748	0.933469944	0.955901847	0.211907156	0.150908529	0.22624879	-0.122672038	0.36077238	0.535475539	0.099647866	0.483421265	0.61770495	0.089235119	0.577983056	0.657388293	-0.11225929	0.323633796	0.41303819
ENSMUSG00000103046	Gm37309		predicted gene, 37309 [Source:MGI Symbol;Acc:MGI:5610537]	1.593346494	1.313627131	1.700921361	1.55657222	1.163025576	1.752687685	1.206042188	1.015462322	1.693510904	0.867375897	1.259682699	1.541973852	-0.104246007	0.704910956	0.796277688	-0.051996371	0.870287668	0.901367053	0.23664165	0.421482196	0.591518625	0.288891287	0.373530597	0.511946237	0.18464528	0.605822229	0.682292858	0.340887657	0.189836771	0.267570948
ENSMUSG00000073702	Rpl31	114641	ribosomal protein L31 [Source:MGI Symbol;Acc:MGI:2149632]	5.773509127	5.699866231	5.778205394	5.983680299	5.94229773	5.832599266	4.834521003	4.824397105	4.813501965	5.125167481	4.962703297	5.015582427	0.20734827	0.042844623	0.100557105	0.163982843	0.132560264	0.203731297	0.924558474	1.03362E-06	6.16468E-05	0.881193047	2.8442E-06	7.02722E-05	1.088541317	1.29284E-06	1.96072E-05	0.717210204	2.21361E-06	3.16698E-05
ENSMUSG00000003134	Tbc1d8	54610	TBC1 domain family, member 8 [Source:MGI Symbol;Acc:MGI:1927225]	6.324291279	6.203821671	6.475345207	7.27058962	6.986407181	6.914519356	5.359080178	5.532041097	5.224419354	4.786015481	4.91694676	4.985315837	-0.485050248	0.002562529	0.011683442	0.697487724	0.000377352	0.001758529	0.945623755	1.81289E-05	0.000469862	2.128161727	8.86465E-09	1.83803E-06	1.643111479	5.1158E-07	9.90755E-06	1.430674003	5.0901E-08	1.77722E-06
ENSMUSG00000003135	Cnot11	52846	CCR4-NOT transcription complex, subunit 11 [Source:MGI Symbol;Acc:MGI:106580]	4.793715571	4.854334014	4.813513743	4.614003035	4.823858247	4.808904178	5.090568141	5.123132493	5.023826052	5.171756691	5.022834183	5.10751441	0.015510864	0.871623237	0.9153167	-0.049803064	0.644899618	0.718728078	-0.255266163	0.025589155	0.088423012	-0.320580091	0.011105951	0.033908544	-0.305069227	0.026846938	0.052670197	-0.270777027	0.007722889	0.01864553
ENSMUSG00000085894	Gm15832		predicted gene 15832 [Source:MGI Symbol;Acc:MGI:3834078]	3.078866268	3.224211969	3.377320384	5.577467018	5.322020879	5.343706222	2.819076127	2.880411288	2.952060081	3.069389725	3.712590804	3.638419568	0.591821977	0.011041941	0.035796251	2.155086245	9.24575E-07	1.79138E-05	0.335912803	0.128986338	0.268929642	1.89917707	3.24792E-06	7.64641E-05	2.490999048	7.3145E-07	1.31283E-05	-0.255909175	0.169229711	0.243041368
ENSMUSG00000048234	Rnf149	67702	ring finger protein 149 [Source:MGI Symbol;Acc:MGI:2677438]	5.508121625	5.333862423	5.569605351	7.725885857	7.359835622	7.488915814	5.08206765	5.157923969	5.046332105	5.595031225	5.448382836	5.65906615	0.453414868	0.00231582	0.010795761	2.027139981	6.14568E-09	5.97034E-07	0.35836397	0.013135695	0.05521364	1.932089083	1.02843E-08	1.9843E-06	2.385503951	4.57629E-09	3.34996E-07	-0.095050898	0.368110092	0.458594333
ENSMUSG00000050967	Creg2	263764	cellular repressor of E1A-stimulated genes 2 [Source:MGI Symbol;Acc:MGI:1928333]	-0.495033244	-1.144070047	-1.113736952	1.599959569	1.626146123	1.762648669	-2.599404462	-1.043664589	-4.681977919	-1.848999655	-0.566685217	-1.418500758	1.562523459	0.078667849	0.159354588	2.594163341	0.017692162	0.039343606	1.843406086	0.05293128	0.147506788	2.875045969	0.010465264	0.032300255	4.437569427	0.001349086	0.004429568	0.280882628	0.708184685	0.775997922
ENSMUSG00000026074	Map4k4	26921	mitogen-activated protein kinase kinase kinase kinase 4 [Source:MGI Symbol;Acc:MGI:1349394]	7.435569626	7.480736818	7.514355316	7.410349969	7.29743409	7.43332159	7.60570775	7.588634902	7.733200941	7.440017552	7.642255554	7.649993951	-0.070626168	0.515366104	0.638439978	-0.110792228	0.352031064	0.446613291	-0.170666372	0.150094773	0.298257272	-0.210832433	0.092499349	0.178745438	-0.281458601	0.056235851	0.097836999	-0.100040205	0.29553968	0.384243073
ENSMUSG00000026072	Il1r1	16177	interleukin 1 receptor, type I [Source:MGI Symbol;Acc:MGI:96545]	3.759072189	3.477575703	3.587970673	1.703697283	2.594118795	2.916936941	2.841401979	2.677710584	2.995175079	1.694344327	0.921682172	1.526857094	-1.505088453	0.000199978	0.001735228	-1.076223267	0.005825904	0.015866195	0.772657215	0.022556558	0.081159207	1.2015224	0.00292548	0.011900665	-0.303566052	0.41071884	0.499624004	2.277745668	1.77204E-06	2.68746E-05
ENSMUSG00000070942	Il1rl2	107527	interleukin 1 receptor-like 2 [Source:MGI Symbol;Acc:MGI:1913107]	6.774896123	6.710382331	6.740423979	5.405113451	5.77374526	5.641723025	6.281257677	6.182420934	6.354601971	6.309685082	6.126978911	6.206693856	-0.06074424	0.574562791	0.689455497	-1.088163456	1.27588E-06	2.30189E-05	0.468390933	0.001391119	0.010695936	-0.559028283	0.000507201	0.002997041	-0.619772523	0.000667875	0.002480781	0.529135173	0.00012405	0.000677664
ENSMUSG00000103230	Gm17970		predicted gene, 17970 [Source:MGI Symbol;Acc:MGI:5010155]	2.235119888	2.112330177	2.300447766	0.39844967	0.319295071	-0.044075716	2.449813297	2.303350887	2.88655142	-0.734499996	1.379683836	0.413701947	-2.099400247	0.001770489	0.00884099	-2.038794491	0.005630229	0.015417927	-0.332478159	0.551703994	0.701920678	-0.271872403	0.656691605	0.76341086	-2.371272651	0.004396162	0.011776222	1.766922088	0.002994539	0.008591518
ENSMUSG00000026069	Il1rl1	17082	interleukin 1 receptor-like 1 [Source:MGI Symbol;Acc:MGI:98427]	4.234327044	4.533877949	4.00268417	2.580552758	3.05044823	3.448208754	3.846860431	3.913356695	3.670744655	3.456321917	3.351977705	3.292987318	-0.436674748	0.037217014	0.090109242	-1.155167941	0.000180248	0.000977363	0.453556539	0.039710378	0.120422739	-0.264936654	0.232056628	0.360959655	-0.701611402	0.012749493	0.028315901	0.890231287	0.000220355	0.001051951
ENSMUSG00000026068	Il18rap	16174	interleukin 18 receptor accessory protein [Source:MGI Symbol;Acc:MGI:1338888]	1.698128557	2.313026968	2.30146394	4.777189534	4.638038405	4.540414126	1.275533048	1.826705729	0.758494006	2.587418043	2.868524589	3.015634063	1.516137955	0.000178093	0.001597752	2.51733493	6.26037E-06	7.20284E-05	0.810648136	0.017265665	0.06696109	1.81184511	0.000123069	0.001020704	3.327983065	1.31302E-06	1.98051E-05	-0.705489819	0.015576289	0.033137183
ENSMUSG00000041945	Mfsd9	211798	major facilitator superfamily domain containing 9 [Source:MGI Symbol;Acc:MGI:2443548]	3.196352811	3.882512133	2.969847139	0.921097662	1.827022513	1.794576553	2.551505126	2.792517917	2.010617383	2.479763217	2.35881573	2.008182144	-0.138267497	0.653282961	0.755025532	-1.729406781	0.000368749	0.001727712	0.903925989	0.01556322	0.062252878	-0.687213294	0.069928366	0.144388356	-0.825480791	0.055214775	0.096338063	1.042193486	0.002628974	0.007700789
ENSMUSG00000060679	Mrps9	69527	mitochondrial ribosomal protein S9 [Source:MGI Symbol;Acc:MGI:1916777]	4.170911501	3.991034716	4.197476218	4.086593234	4.161766285	3.898796729	4.12308795	4.08794142	4.227640115	3.79923549	4.290091682	4.078168364	-0.072967395	0.648975085	0.751064347	-0.073035502	0.686999235	0.754629032	-0.032574473	0.846707828	0.913330385	-0.03264258	0.856797591	0.908112622	-0.105609975	0.607267081	0.683421442	0.040392923	0.777524726	0.832732519
ENSMUSG00000070939	Tgfbrap1	73122	transforming growth factor, beta receptor associated protein 1 [Source:MGI Symbol;Acc:MGI:2447427]	7.001603192	7.147908982	6.948101794	5.757315036	6.07740089	6.095192369	7.164142693	7.133744032	7.162397821	6.986316873	7.046012462	6.951215509	-0.150085149	0.177445465	0.292624929	-1.033564564	1.83953E-06	2.99939E-05	-0.101211621	0.374680101	0.548304642	-0.984691036	3.04894E-06	7.44393E-05	-1.134776185	3.02905E-06	3.56606E-05	0.048873528	0.599749938	0.681253159
ENSMUSG00000010290	AI597479	98404	expressed sequence AI597479 [Source:MGI Symbol;Acc:MGI:2138299]	3.804545431	3.673704302	3.922643895	3.568876844	3.593036262	3.424631503	3.88249568	3.819847758	3.98629837	3.542006506	3.355021535	3.543023522	-0.431846484	0.005457004	0.020895451	-0.277414975	0.077005315	0.130665425	-0.097613762	0.475588088	0.63797506	0.056817748	0.697547009	0.795789033	-0.375028736	0.039493013	0.07273458	0.334232723	0.012591602	0.027809434
ENSMUSG00000094497	Gm8210		predicted pseudogene 8210 [Source:MGI Symbol;Acc:MGI:3643593]	3.173844936	3.026401539	3.119260591	3.294181232	3.441255068	3.222135317	2.417409011	2.499370814	2.284292551	2.375447132	2.553434267	2.409955047	0.058604077	0.673725729	0.771781795	0.21714385	0.187412318	0.269293745	0.705411011	0.000449025	0.004692924	0.863950785	0.000163951	0.00127454	0.922554862	0.000252568	0.001133661	0.646806935	0.000249309	0.001153313
ENSMUSG00000057363	Uxs1	67883	UDP-glucuronate decarboxylase 1 [Source:MGI Symbol;Acc:MGI:1915133]	4.663754546	4.718755626	4.685825135	5.087935412	5.341810846	5.352828184	4.579341765	4.636892921	4.497011391	5.029634319	4.946096883	5.0276612	0.42379297	0.000934621	0.005434808	0.599926328	0.000149638	0.000842419	0.120272896	0.253534205	0.422263179	0.296406254	0.017668751	0.049032019	0.720199224	9.35132E-05	0.00051674	-0.303520074	0.004116918	0.011165994
ENSMUSG00000041763	Tpp2	22019	tripeptidyl peptidase II [Source:MGI Symbol;Acc:MGI:102724]	6.592713753	6.587165265	6.664596298	7.525686302	7.710155631	7.784559876	6.724786254	6.816283797	6.653603967	7.633757822	7.601274632	7.752302504	0.918334845	1.60397E-06	4.62447E-05	1.0852835	6.95722E-07	1.4361E-05	-0.123509307	0.26088373	0.431203493	0.043439348	0.695781492	0.794361973	0.961774193	9.24275E-06	8.38122E-05	-1.041844152	1.07612E-07	3.14064E-06
ENSMUSG00000026049	Tex30	75623	testis expressed 30 [Source:MGI Symbol;Acc:MGI:1922873]	0.866368151	2.07383375	1.217078204	1.566663118	1.015336415	1.340925129	1.28357545	0.903928447	1.914500963	0.607592475	1.134869337	0.818812167	-0.483260906	0.208981005	0.33129797	-0.075923931	0.860028772	0.893272501	-0.01892733	0.961412027	0.979318749	0.388409646	0.376358938	0.514654826	-0.094851261	0.843630645	0.882974227	0.464333577	0.186593679	0.263484329
ENSMUSG00000101104	Gm29247		predicted gene 29247 [Source:MGI Symbol;Acc:MGI:5579953]	0.320435489	1.027942727	0.615560339	0.676200063	0.521484428	0.427480589	0.604089207	0.504402161	0.857896977	-0.105552027	0.652533079	0.268581448	-0.346629773	0.296161806	0.429107198	-0.120151125	0.749840796	0.806690028	-0.023592213	0.944832908	0.970991065	0.202886435	0.593016749	0.710494927	-0.143743338	0.732582675	0.791125507	0.323037561	0.285807399	0.373336754
ENSMUSG00000026047	Poglut2	72050	protein O-glucosyltransferase 2 [Source:MGI Symbol;Acc:MGI:1919300]	3.63261754	3.617497421	3.285645584	2.708086436	2.974521837	3.272833522	3.098346972	3.247692279	2.814160476	2.979111941	3.139123405	2.91054546	-0.023199564	0.896218125	0.931557216	-0.474461114	0.035239823	0.068526263	0.458613797	0.02947866	0.097220626	0.007352247	0.971039417	0.982496692	-0.015847317	0.944617358	0.958275474	0.481813361	0.01032869	0.023638576
ENSMUSG00000041684	Bivm	246229	basic, immunoglobulin-like variable motif containing [Source:MGI Symbol;Acc:MGI:2179809]	4.341937414	4.076193335	4.359394721	2.419283772	2.711868106	3.001628678	4.212344141	4.289119124	4.211338538	3.577763694	3.488572765	3.863791976	-0.626202366	0.002077988	0.009939513	-1.493107989	4.0378E-06	5.22769E-05	0.011918947	0.943731614	0.970847125	-0.854986677	0.000543033	0.003172393	-1.481189042	1.38225E-05	0.000114846	0.638121313	0.000825593	0.003000779
ENSMUSG00000026048	Ercc5	22592	excision repair cross-complementing rodent repair deficiency, complementation group 5 [Source:MGI Symbol;Acc:MGI:103582]	4.807585151	5.157499454	5.050277938	3.779259375	4.101037883	3.687711171	5.27366524	5.134653072	5.509714173	4.55612416	4.990932088	4.736429984	-0.525321698	0.010645944	0.034790274	-1.141673727	9.72302E-05	0.00059899	-0.291478032	0.134576092	0.277319978	-0.907830061	0.000629809	0.003588721	-1.433151759	4.03946E-05	0.000265074	0.233843666	0.152562338	0.222789446
ENSMUSG00000025995	Wdr75	73674	WD repeat domain 75 [Source:MGI Symbol;Acc:MGI:1920924]	4.509029374	4.205599183	4.696404795	5.353423193	5.161921037	5.012369597	4.669583095	4.873678907	4.512216007	4.973411857	5.033620076	5.237978812	0.376598421	0.036972293	0.089668137	0.68751976	0.002674333	0.008548514	-0.23351813	0.190653829	0.349882227	0.077403208	0.672884553	0.776452547	0.454001629	0.046486787	0.083425197	-0.610116552	0.001213671	0.004087348
ENSMUSG00000084817	Gm5526		predicted pseudogene 5526 [Source:MGI Symbol;Acc:MGI:3643066]	3.279792924	3.113809722	3.319895297	3.523832677	3.547977896	3.622370624	2.766995035	2.742882079	2.834249473	3.436675141	3.247749127	3.489433342	0.589572404	0.000774542	0.004744679	0.335690792	0.042033051	0.079369735	0.453483244	0.006499349	0.033145726	0.199601632	0.19933748	0.322074468	0.789174036	0.000560594	0.002149538	-0.13608916	0.262365311	0.348149671
ENSMUSG00000025993	Slc40a1	53945	solute carrier family 40 (iron-regulated transporter), member 1 [Source:MGI Symbol;Acc:MGI:1315204]	7.579301416	7.747560856	7.291758579	4.608019159	5.721472047	5.739951615	8.539323607	8.550046574	8.345987776	7.514083065	7.569861265	7.367650317	-0.97079302	0.000668367	0.004263067	-2.075872989	1.64893E-06	2.78334E-05	-0.898313405	0.00167861	0.012286222	-2.003393375	2.41941E-06	6.30101E-05	-2.974186395	1.9298E-07	5.13579E-06	0.072479615	0.6944678	0.764586042
ENSMUSG00000101262	Gm8326		predicted gene 8326 [Source:MGI Symbol;Acc:MGI:3644839]	2.418432907	1.814741608	2.411769958	3.398819541	2.935035657	3.124772206	1.853716659	1.559555902	2.36503789	2.262970024	2.298327434	2.560233964	0.426810711	0.109581806	0.205024977	0.894600016	0.008627016	0.021833943	0.28801146	0.289846945	0.46351488	0.755800765	0.020957011	0.056171098	1.182611476	0.003220147	0.009103436	-0.13879925	0.542850499	0.628754305
ENSMUSG00000025986	Slc39a10	227059	solute carrier family 39 (zinc transporter), member 10 [Source:MGI Symbol;Acc:MGI:1914515]	5.848734194	5.935375142	5.989186463	5.97108685	5.803935801	5.581926058	5.889003118	5.935329095	5.838924412	5.915339706	5.973831236	5.908178881	0.048382112	0.630203089	0.735572283	-0.167251499	0.148391645	0.223246343	0.03905314	0.711593338	0.823787887	-0.17658047	0.129470441	0.231659372	-0.128198359	0.321431044	0.409775174	-0.009328972	0.915237753	0.939933679
ENSMUSG00000100213	Gm28151		predicted gene 28151 [Source:MGI Symbol;Acc:MGI:5578857]	-0.008166391	-1.161930779	1.022420462	-0.951695814	-2.400935383	-1.733605133	0.569086387	1.0685322	0.759210512	-3.277509965	-2.246984689	-1.014098906	-3.091051021	0.001524866	0.007913126	-1.814282245	0.057003292	0.102113441	-0.832098428	0.308258328	0.482896335	0.444670348	0.613603506	0.728686947	-2.646380673	0.018218655	0.03799633	2.258952594	0.006251571	0.015662185
ENSMUSG00000081185	Gm4852		predicted pseudogene 4852 [Source:MGI Symbol;Acc:MGI:3643039]	1.605204694	1.320158592	1.437443443	2.229613546	1.930757581	2.235663611	1.559534175	1.702577721	1.374085144	1.891220661	1.865560179	1.915461755	0.339922094	0.078568541	0.159223074	0.664914266	0.007274797	0.018978682	-0.089551234	0.638444323	0.770169202	0.235440937	0.26960942	0.403737185	0.575363031	0.027555624	0.053862774	-0.429473328	0.020614208	0.041910227
ENSMUSG00000100033	Gm8337		predicted gene 8337 [Source:MGI Symbol;Acc:MGI:3644012]	3.212166141	3.088221178	3.409403034	4.447435624	4.344287655	4.300929831	3.231110379	3.390687547	3.133123718	3.362419749	3.439922892	3.628914212	0.206902077	0.165372836	0.278130682	1.113187697	2.16342E-05	0.000187037	-0.021981692	0.883735982	0.935308568	0.884303927	0.000164836	0.001280704	1.091206005	7.62001E-05	0.000440338	-0.22888377	0.093952825	0.14843542
ENSMUSG00000026107	Nabp1	109019	nucleic acid binding protein 1 [Source:MGI Symbol;Acc:MGI:1923258]	4.038700785	3.810554321	3.830247307	4.422020529	5.365629959	5.467630483	4.056326101	4.083453916	3.99966662	5.859688616	5.951147778	6.027487105	1.896654333	2.07461E-07	9.70385E-06	1.314950381	2.26652E-05	0.000194338	-0.15955778	0.384958763	0.558392991	-0.741261732	0.002297977	0.009894632	1.155392601	0.000210726	0.000977759	-2.056212113	2.68998E-08	1.14982E-06
ENSMUSG00000018417	Myo1b	17912	myosin IB [Source:MGI Symbol;Acc:MGI:107752]	6.144700512	6.133436766	6.081180619	5.691566038	6.053393791	6.009235191	6.642699587	6.580124395	6.693273405	6.877919238	6.901788667	6.874514952	0.250092669	0.022839826	0.062201699	-0.159592493	0.150566025	0.225832781	-0.515664938	0.000302319	0.003473796	-0.925350099	2.25216E-06	5.95943E-05	-0.67525743	0.000144594	0.000727263	-0.765757607	1.53718E-06	2.43218E-05
ENSMUSG00000101628	Gm28177		predicted gene 28177 [Source:MGI Symbol;Acc:MGI:5578883]	6.566190516	6.23802181	6.364619544	6.617301201	6.695212199	6.799188094	4.552743479	4.563766126	4.487651964	4.994280077	4.824863639	4.92653435	0.375383843	0.006238524	0.023203634	0.343148288	0.018032413	0.039959528	1.841552117	7.18189E-09	1.60921E-06	1.809316562	1.49254E-08	2.47717E-06	2.184700405	8.29155E-09	5.00809E-07	1.466168274	1.20435E-08	6.56112E-07
ENSMUSG00000078291	Gm3940		predicted gene 3940 [Source:MGI Symbol;Acc:MGI:3782114]	1.87381774	1.708130356	1.574463867	1.93942271	1.762721268	1.823406791	0.789364851	0.777538774	0.675426808	1.030469824	0.892845007	0.697025052	0.143567489	0.477415031	0.60524271	0.111173332	0.633184348	0.708961335	0.973517772	0.000629165	0.005974268	0.941123615	0.001620527	0.007432782	1.084691104	0.001284679	0.004257536	0.829950283	0.000680526	0.002580202
ENSMUSG00000026104	Stat1	20846	signal transducer and activator of transcription 1 [Source:MGI Symbol;Acc:MGI:103063]	7.55038338	7.154111126	7.281138617	7.620915618	7.699008238	7.712580048	5.62372141	5.621251804	5.542557935	6.036502174	5.924319472	5.939862593	0.374554459	0.008275372	0.028726004	0.38728192	0.011168166	0.027076468	1.709411045	2.46765E-08	4.13019E-06	1.722138506	3.45165E-08	4.09832E-06	2.096692965	1.91091E-08	9.06018E-07	1.334856586	4.5485E-08	1.63927E-06
ENSMUSG00000026103	Gls	14660	glutaminase [Source:MGI Symbol;Acc:MGI:95752]	6.388741461	6.513106152	6.751896546	6.864583131	6.890656805	6.779078007	6.382853466	6.459933983	6.476644561	6.178228697	6.476423007	6.582336741	-0.043843952	0.758809382	0.835821435	0.295303809	0.078186728	0.132266199	0.098480943	0.515196868	0.671399145	0.437628703	0.015221915	0.043376994	0.393784751	0.046221427	0.083002593	0.142324894	0.265542739	0.351444666
ENSMUSG00000002881	Nab1	17936	Ngfi-A binding protein 1 [Source:MGI Symbol;Acc:MGI:107564]	4.535935705	4.493278815	4.927603438	6.64638524	6.702384438	6.643774456	4.044905715	4.245223186	3.962100709	5.528641167	5.456716786	5.881093128	1.498760406	1.68664E-06	4.7527E-05	2.021290544	2.58875E-07	7.03774E-06	0.551704443	0.00828804	0.039661542	1.074234581	0.000103767	0.000896478	2.572994987	8.22842E-08	2.75214E-06	-0.947055963	4.08278E-05	0.00028353
ENSMUSG00000043015	Nemp2	227094	nuclear envelope integral membrane protein 2 [Source:MGI Symbol;Acc:MGI:2444113]	4.936310172	5.004973138	4.888030414	4.070048843	4.697082535	4.667166477	4.746060591	4.749301316	4.705940962	5.265658289	5.254134467	5.273083794	0.531122735	0.000862414	0.00514191	-0.395422744	0.01193656	0.028560574	0.214263063	0.111324458	0.242896085	-0.712282415	0.000213189	0.001553027	-0.18115968	0.250911125	0.334335641	-0.316859672	0.011230749	0.025314798
ENSMUSG00000041439	Mfsd6	98682	major facilitator superfamily domain containing 6 [Source:MGI Symbol;Acc:MGI:1922925]	-2.695159309	-2.125283821	-4.412605478	-0.784567765	-1.351720757	-0.625253558	1.121400144	0.987183372	0.507778655	2.123016651	1.768447264	0.05724608	0.595067781	0.423982839	0.555290808	2.21735763	0.021733586	0.046394595	-3.982071193	0.000264839	0.003199254	-2.359781344	0.016226309	0.045630746	-1.764713563	0.083696875	0.136069864	-4.577138974	2.19471E-05	0.000179031
ENSMUSG00000026102	Inpp1	16329	inositol polyphosphate-1-phosphatase [Source:MGI Symbol;Acc:MGI:104848]	3.73630113	3.167033839	3.852349576	3.027495706	3.530912688	3.277737185	3.689335381	3.732449492	3.743111403	4.304252138	4.370049174	4.700823065	0.709421354	0.004728124	0.018707805	-0.253183998	0.290281558	0.382998519	-0.151060723	0.491227398	0.652839473	-1.113666075	0.00048716	0.002900825	-0.404244721	0.144780646	0.214126768	-0.860482077	0.000572342	0.002242237
ENSMUSG00000041426	Hibch	227095	3-hydroxyisobutyryl-Coenzyme A hydrolase [Source:MGI Symbol;Acc:MGI:1923792]	3.139294471	2.9056956	2.665414048	1.430547212	1.999371302	2.521125753	2.921885222	2.841938944	2.886219207	3.486562422	3.052111735	3.214348251	0.358326537	0.12902328	0.231968222	-0.814516446	0.00740519	0.019232175	0.021369484	0.927790361	0.961855499	-1.151473499	0.000736434	0.004028517	-0.793146962	0.016403041	0.034880002	-0.336957053	0.113885585	0.174067394
ENSMUSG00000026098	Pms1	227099	PMS1 homolog 1, mismatch repair system component [Source:MGI Symbol;Acc:MGI:1202302]	2.685075697	2.518667925	2.389746838	1.546243995	2.237898034	1.610792346	2.874563401	2.801127549	2.63537967	2.660370777	1.871952308	1.804377587	-0.647706051	0.033390069	0.082920064	-0.691802234	0.044448032	0.083027035	-0.226834102	0.437465257	0.606220765	-0.270930285	0.393719622	0.532162535	-0.918636336	0.021463622	0.043656315	0.420871948	0.107671301	0.166199501
ENSMUSG00000026097	Ormdl1	227102	ORM1-like 1 (S. cerevisiae) [Source:MGI Symbol;Acc:MGI:2181669]	4.531236464	4.53130955	4.250689717	3.868705879	4.204485485	4.022329305	4.706939453	4.655919894	4.616537464	4.443347381	4.567322845	4.201131707	-0.221622075	0.139338149	0.245682114	-0.375763366	0.035582103	0.069104791	-0.213571176	0.173547033	0.32926314	-0.367712468	0.039107751	0.091817622	-0.589334542	0.00688825	0.017086437	0.008050898	0.949448851	0.963810262
ENSMUSG00000100679	Gm28778		predicted gene 28778 [Source:MGI Symbol;Acc:MGI:5579484]	2.365340294	2.652132948	2.559049328	1.608018863	1.97965065	1.842407272	2.296455208	2.305364124	2.284929368	2.522340256	2.272161156	2.452229298	0.104115752	0.520670243	0.643576031	-0.683383854	0.002914865	0.009155168	0.2315434	0.190018668	0.3491553	-0.555956206	0.010217986	0.031699032	-0.451840454	0.046890973	0.084063673	0.127427648	0.387023743	0.47812662
ENSMUSG00000026096	Osgepl1	72085	O-sialoglycoprotein endopeptidase-like 1 [Source:MGI Symbol;Acc:MGI:1919335]	3.578542636	3.73397593	3.54622499	3.077010466	3.024690958	3.183528594	3.249234559	3.256232469	3.261851703	3.755869687	3.974786373	3.840416856	0.611991149	0.000330694	0.002502178	-0.523144188	0.002657806	0.008509105	0.364604633	0.014580286	0.059555815	-0.770530703	0.000143461	0.001148015	-0.158539555	0.322486254	0.410818802	-0.247386515	0.041180618	0.074820971
ENSMUSG00000099913	Gm28551		predicted gene 28551 [Source:MGI Symbol;Acc:MGI:5579257]	3.392809706	3.372034759	3.336096742	2.884975569	3.32837029	3.135095045	3.257582896	3.216818721	3.261675999	2.767500032	2.808418146	2.729873947	-0.468193027	0.002864664	0.01270623	-0.210172273	0.160441183	0.23764249	0.123650145	0.360115269	0.53510764	0.381670899	0.019589024	0.053202486	-0.086522128	0.593639943	0.671403247	0.591843172	0.000226653	0.001074627
ENSMUSG00000026095	Asnsd1	70396	asparagine synthetase domain containing 1 [Source:MGI Symbol;Acc:MGI:1917646]	4.00832741	3.925675432	3.965180836	3.46895881	3.932849291	3.593984288	3.901641306	3.81107516	3.961760742	3.375134258	3.437223353	3.326467545	-0.500024407	0.001653801	0.008403292	-0.265181266	0.079322345	0.133747545	0.077033033	0.558011305	0.707354052	0.311876174	0.044263382	0.10118593	-0.188148233	0.249940746	0.333350311	0.57705744	0.000242156	0.0011266
ENSMUSG00000117809	Gm50478	110599589	predicted gene, 50478 [Source:MGI Symbol;Acc:MGI:6324750]	0.683814342	0.526904004	0.643752265	-0.086176861	0.600586047	0.683557893	0.724486259	0.898442516	0.451262206	0.303595389	-0.308471905	0.15017629	-0.686782597	0.043999493	0.102557208	-0.136284998	0.705224485	0.770021107	-0.068632889	0.833288674	0.905099263	0.48186471	0.198426806	0.321163368	-0.204917887	0.611322741	0.686983944	0.618149708	0.046134939	0.082167522
ENSMUSG00000026094	Stk17b	98267	serine/threonine kinase 17b (apoptosis-inducing) [Source:MGI Symbol;Acc:MGI:2138162]	5.552708475	5.687818689	5.734819862	6.905038326	6.775962837	6.68058819	6.430334783	6.492290203	6.36590102	7.319670125	7.153155631	7.2661127	0.807395727	6.40964E-06	0.000128304	1.105006825	7.03914E-07	1.4485E-05	-0.765656371	1.68768E-05	0.000447842	-0.468045274	0.001371759	0.006537384	0.339350454	0.021505056	0.043721387	-1.573052098	1.7261E-09	1.6202E-07
ENSMUSG00000041303	Gtf3c3		general transcription factor IIIC, polypeptide 3 [Source:MGI Symbol;Acc:MGI:2138383]	4.967454529	4.959158835	4.917115818	4.63877725	4.684885005	4.613007299	4.763135109	4.7231605	4.742565371	4.875448824	4.633940086	4.665949865	-0.018474443	0.858425875	0.906779338	-0.300181467	0.022974989	0.048513231	0.209052439	0.076001186	0.187766047	-0.072654585	0.53620841	0.664200377	-0.091129028	0.494772669	0.580081182	0.227526882	0.028101732	0.054160551
ENSMUSG00000073678	Pgap1	241062	post-GPI attachment to proteins 1 [Source:MGI Symbol;Acc:MGI:2443342]	4.980116549	5.255097984	4.935451821	3.954125742	4.262976252	4.34361199	4.273856947	4.292363558	4.262977675	4.123632772	4.539575737	4.274699673	0.057686337	0.71239024	0.801475948	-0.837787116	0.00049059	0.002182986	0.787779769	0.000475129	0.00491474	-0.107693685	0.543954712	0.670578959	-0.050007347	0.802085759	0.849346396	0.730093431	0.00022724	0.001076213
ENSMUSG00000052331	Ankrd44	329154	ankyrin repeat domain 44 [Source:MGI Symbol;Acc:MGI:3045243]	7.47710533	7.69213067	7.63014359	7.502541769	7.645756187	7.6688913	8.121676944	8.090409959	8.221924161	8.251088318	8.297093459	8.343583081	0.146538437	0.182741092	0.29908568	0.006488763	0.954718595	0.96640562	-0.531407518	0.000461529	0.004806266	-0.671457192	9.11463E-05	0.000819705	-0.524918755	0.001887383	0.005857803	-0.677945955	1.07128E-05	0.000104071
ENSMUSG00000025982	Sf3b1	81898	splicing factor 3b, subunit 1 [Source:MGI Symbol;Acc:MGI:1932339]	8.6168952	8.614992687	8.756198182	9.002748518	8.846268886	8.955241888	8.531126205	8.491907885	8.692337021	8.712222073	8.708625378	8.871787656	0.175980426	0.142715321	0.249760802	0.259670759	0.055001439	0.09899001	0.078258855	0.517191596	0.673177706	0.161949188	0.209480871	0.334226284	0.337929614	0.034352771	0.06485848	-0.097721571	0.333707385	0.423173253
ENSMUSG00000025981	Coq10b	67876	coenzyme Q10B [Source:MGI Symbol;Acc:MGI:1915126]	4.155917711	4.263057977	3.885089915	4.693524968	4.982245089	5.205851061	4.168294673	4.115463584	4.102445476	5.5668276	5.341604996	5.271750707	1.274238007	2.47409E-06	6.38848E-05	0.899432591	0.000171528	0.000939987	-0.015433948	0.920875869	0.957330507	-0.390239364	0.034736064	0.083587978	0.883998644	0.000543122	0.00209818	-1.289671955	6.97664E-07	1.33131E-05
ENSMUSG00000101122	Gm17971		predicted gene, 17971 [Source:MGI Symbol;Acc:MGI:5010156]	-0.154979638	1.230813959	0.354908903	0.62667789	0.006682377	0.895867251	0.309645625	-0.325774175	1.380322678	1.607030573	1.740844853	1.952625807	1.296669695	0.015576195	0.046497083	0.083695451	0.876796713	0.906959042	-0.02025349	0.967021986	0.982249267	-1.233227734	0.03966936	0.092822427	0.063441961	0.916121439	0.937859913	-1.316923185	0.008664022	0.020472971
ENSMUSG00000025980	Hspd1	15510	heat shock protein 1 (chaperonin) [Source:MGI Symbol;Acc:MGI:96242]	5.573521359	5.302102718	5.481262767	5.647322591	5.757055826	5.779580716	5.52626272	5.520646242	5.502123875	5.410540835	5.162131317	5.343770996	-0.222963932	0.074836542	0.153405525	0.303094197	0.034983446	0.068123077	-0.075819941	0.53885779	0.691274579	0.450238188	0.004403028	0.016306815	0.227274256	0.142482326	0.211425388	0.147143991	0.169590818	0.243484461
ENSMUSG00000073676	Hspe1	15528	heat shock protein 1 (chaperonin 10) [Source:MGI Symbol;Acc:MGI:104680]	3.928626116	3.685257909	3.611107936	3.78121272	3.968042956	3.673833984	3.228836131	3.0479672	3.262333695	3.301033331	3.069063212	2.848532297	-0.083485341	0.614149599	0.723186014	0.075448526	0.687745169	0.75520954	0.568108324	0.00651786	0.033209732	0.727042191	0.002195814	0.009523651	0.64355685	0.009773627	0.022770646	0.651593664	0.000880497	0.003153975
ENSMUSG00000089670	Gm16581		predicted gene 16581 [Source:MGI Symbol;Acc:MGI:4415001]	2.91324465	2.881351965	3.294070741	3.421295638	3.034607012	3.137200305	2.74587349	2.592593326	3.159518134	2.92599228	2.92089249	3.311572878	0.18451527	0.377156932	0.512417027	0.126163558	0.591492682	0.671928722	0.191124423	0.385780645	0.55930544	0.132772711	0.572971885	0.694703949	0.317287981	0.24331444	0.326235325	0.006609153	0.97138288	0.979420161
ENSMUSG00000025979	Mob4	19070	MOB family member 4, phocein [Source:MGI Symbol;Acc:MGI:104899]	5.464988249	5.325042	5.354012558	5.632748662	5.823505034	5.875293438	5.788357016	5.818408502	5.724901845	5.944663463	5.931607218	5.955659608	0.166454841	0.088559391	0.174878048	0.427218394	0.001182804	0.004417074	-0.401786096	0.001303736	0.010146497	-0.141022542	0.180436645	0.299405861	0.025432298	0.82574753	0.869431915	-0.568240937	1.64161E-05	0.000143398
ENSMUSG00000046994	Mars2		methionine-tRNA synthetase 2 (mitochondrial) [Source:MGI Symbol;Acc:MGI:2444136]	3.344394186	3.434056727	3.632222342	3.118073867	3.360727544	2.946242422	3.527080074	3.332540085	3.76216077	3.684752709	3.124206249	3.465757188	-0.143452531	0.481569052	0.60875427	-0.328036205	0.170622588	0.249740701	-0.064759315	0.761077993	0.857911025	-0.249342989	0.289598723	0.425365348	-0.39279552	0.148139438	0.218280979	0.078693216	0.664593406	0.738957227
ENSMUSG00000100215	Gm8292		predicted gene 8292 [Source:MGI Symbol;Acc:MGI:3648460]	2.955438452	2.646078503	2.766596602	3.07627496	2.901854727	2.565515767	1.848027899	1.765847832	1.844551055	2.042812357	2.079121965	1.813934206	0.183874639	0.292686324	0.425402637	0.016703372	0.931666172	0.948948344	0.974251415	0.000174937	0.002382055	0.807080148	0.001400389	0.00665101	0.990954787	0.000731164	0.002675092	0.790376776	0.000265311	0.001208822
ENSMUSG00000038349	Plcl1	227120	phospholipase C-like 1 [Source:MGI Symbol;Acc:MGI:3036262]	5.448494246	5.735800311	5.539611032	5.380121885	5.549387613	5.561366991	5.126960008	4.92954616	5.418680476	5.953952069	6.059653022	5.993134122	0.847934364	5.62469E-05	0.00065061	-0.07458366	0.624711553	0.701405714	0.432565465	0.010810052	0.04793273	-0.489952559	0.007043019	0.02350267	0.357981804	0.058594836	0.101243714	-0.415368899	0.004763126	0.012600629
ENSMUSG00000102145	Gm38056		predicted gene, 38056 [Source:MGI Symbol;Acc:MGI:5611284]	1.515155097	0.630853759	1.119132351	0.685813186	-0.263075534	0.540902319	0.633892094	0.069947319	1.552978489	-0.081585609	0.992687819	0.702526508	-0.176242268	0.70676198	0.797639269	-0.826421125	0.147848189	0.222594962	0.360012349	0.470275214	0.633417033	-0.290166508	0.596596935	0.713553562	-0.466408776	0.447724148	0.53604963	0.536254617	0.223750674	0.305486916
ENSMUSG00000100309	Gm6644		predicted gene 6644 [Source:MGI Symbol;Acc:MGI:3644951]	2.946891972	2.44973227	2.591276081	2.467009754	2.436478617	2.640089516	2.295267265	2.33074223	2.197827708	2.293562928	2.393343284	2.302815142	0.064928903	0.699675876	0.792361398	-0.133881294	0.489820173	0.58166036	0.385916465	0.047637048	0.137126786	0.187106268	0.339946862	0.478716858	0.252035171	0.257099992	0.341195366	0.320987562	0.052485536	0.091668225
ENSMUSG00000038331	Satb2	212712	special AT-rich sequence binding protein 2 [Source:MGI Symbol;Acc:MGI:2679336]	0.994685241	1.227568851	1.191529224	-0.608902294	-1.110375161	-1.29723288	0.68080625	0.762334196	0.607236749	0.198059383	0.323509075	0.192808409	-0.435835506	0.111715469	0.20795274	-2.215823199	1.11547E-05	0.000110924	0.4491913	0.1191269	0.254606536	-1.330796393	0.000862121	0.004522879	-1.766631899	0.000216505	0.000998235	0.885026806	0.002682142	0.007831087
ENSMUSG00000038323	1700066M21Rik	73467	RIKEN cDNA 1700066M21 gene [Source:MGI Symbol;Acc:MGI:1920717]	3.575819048	3.402461816	3.539231438	3.034257575	3.054243031	2.816350977	3.686338018	3.694392814	3.584264855	3.375324687	3.004055691	3.096799066	-0.502939255	0.00520257	0.020118113	-0.547372638	0.006752036	0.017819012	-0.14702792	0.356333644	0.531734029	-0.191461303	0.269879043	0.404084479	-0.694400558	0.003267489	0.00921103	0.355911335	0.019224035	0.03950596
ENSMUSG00000048495	Tyw5	68736	tRNA-yW synthesizing protein 5 [Source:MGI Symbol;Acc:MGI:1915986]	2.416488347	1.757130271	1.950598275	2.152007905	1.775627166	1.989602169	2.021022909	1.963809311	2.052593366	1.379721277	1.823840555	1.470291073	-0.420788601	0.087811732	0.173772163	-0.098569243	0.71059784	0.774235934	0.03427994	0.88785424	0.937168232	0.356499298	0.195915469	0.318322537	-0.064289303	0.828671167	0.87171739	0.455068541	0.046978207	0.0834234
ENSMUSG00000025971	Maip1	68115	matrix AAA peptidase interacting protein 1 [Source:MGI Symbol;Acc:MGI:1915365]	3.586338044	3.555657031	3.744223472	4.244067201	3.962888245	4.163151239	3.616355367	3.497625823	3.867906501	3.958683439	3.743432856	4.059294671	0.232001806	0.138476949	0.244810611	0.472925926	0.015234815	0.034809547	-0.035337162	0.821856251	0.89769769	0.205586958	0.238589078	0.368526255	0.437588764	0.038414517	0.071059184	-0.267338968	0.064445846	0.108716659
ENSMUSG00000054770	Kctd18	51960	potassium channel tetramerisation domain containing 18 [Source:MGI Symbol;Acc:MGI:3603813]	4.299629648	4.594258828	4.509757334	3.855655038	4.153934262	3.72843077	4.529678007	4.518961407	4.565106408	3.86897387	4.191472556	3.974479653	-0.509026674	0.00453127	0.018085354	-0.550075928	0.005966515	0.016161802	-0.063922568	0.680617491	0.79999477	-0.104971822	0.530511818	0.659256401	-0.613998496	0.006477369	0.016222032	0.445104106	0.00518221	0.013478985
ENSMUSG00000026039	Sgo2a	68549	shugoshin 2A [Source:MGI Symbol;Acc:MGI:1098767]	2.656410494	1.872949189	2.134015282	-0.394610583	1.244992658	1.50123258	0.679727165	1.295979663	-0.273556348	0.212739102	-0.395423498	0.079616134	-0.647813326	0.179856884	0.295531148	-1.239190019	0.038054821	0.072998837	1.667763844	0.005023725	0.027487038	1.076387151	0.065880974	0.13793798	0.428573824	0.480483964	0.566484192	2.31557717	0.000156035	0.00080016
ENSMUSG00000051223	Bzw1	66882	basic leucine zipper and W2 domains 1 [Source:MGI Symbol;Acc:MGI:1914132]	7.013364846	7.120859631	7.116945421	7.856977382	7.77611291	7.915068279	7.233964077	7.295491722	7.20510262	7.788669737	7.708763398	7.838641539	0.522061156	0.000180394	0.001613669	0.749736803	1.53263E-05	0.000143352	-0.157327753	0.141219632	0.286523022	0.070347894	0.508612218	0.639945742	0.59240905	0.000408993	0.001667665	-0.679388909	4.6704E-06	5.59803E-05
ENSMUSG00000026034	Clk1	12747	CDC-like kinase 1 [Source:MGI Symbol;Acc:MGI:107403]	7.918819219	7.844847725	7.950347458	7.33817675	7.386037362	7.288853328	7.827942514	7.742600986	7.979553648	7.783394284	7.911988064	7.887183529	0.011028119	0.916609473	0.944983989	-0.552658874	0.000435225	0.001977805	0.043065534	0.697794074	0.813016377	-0.520621459	0.000709916	0.003924453	-0.50959334	0.002296396	0.006881262	0.032037416	0.726245456	0.790885594
ENSMUSG00000026035	Ppil3	70225	peptidylprolyl isomerase (cyclophilin)-like 3 [Source:MGI Symbol;Acc:MGI:1917475]	2.939551272	2.741356509	2.608025462	2.65138467	2.721531126	2.558691215	2.989970478	3.00304352	2.858845856	2.722619248	3.114210498	2.628559857	-0.085145777	0.641229303	0.745124005	-0.116826072	0.575728889	0.65746204	-0.186809719	0.340724722	0.51578379	-0.218490014	0.30440549	0.441073246	-0.303635791	0.210345053	0.289777219	-0.101663942	0.537584067	0.62442457
ENSMUSG00000026036	Nif3l1	65102	Ngg1 interacting factor 3-like 1 (S. pombe) [Source:MGI Symbol;Acc:MGI:1929485]	3.49450498	4.109289361	3.743868844	3.912529634	3.879857702	4.007441904	3.36045276	3.070994811	3.784082528	4.04065169	3.86277878	3.960719104	0.540765121	0.020839627	0.05792399	0.143378986	0.541552613	0.628141346	0.388336343	0.093773958	0.216720649	-0.009049791	0.969033747	0.981357931	0.53171533	0.06298516	0.107400251	-0.152428777	0.414432332	0.505824455
ENSMUSG00000026037	Orc2	18393	origin recognition complex, subunit 2 [Source:MGI Symbol;Acc:MGI:1328306]	4.371609765	4.419462789	4.39746867	4.385456065	4.429518581	4.49448369	4.686648967	4.809951553	4.526271253	4.384996056	4.295901769	4.376342779	-0.32917156	0.008369943	0.02896021	0.047536916	0.689437416	0.756171213	-0.277769269	0.026359206	0.090103861	0.098939207	0.411718799	0.550558409	-0.230232354	0.10712788	0.166747396	0.051402291	0.586089728	0.668414621
ENSMUSG00000038174	Fam126b	213056	family with sequence similarity 126, member B [Source:MGI Symbol;Acc:MGI:1098784]	5.143584864	5.513694875	5.229466781	4.72818688	4.94315136	4.705866394	5.451233519	5.475801938	5.343645602	5.114588527	5.089642363	4.928956594	-0.365030238	0.014318989	0.043527221	-0.503518066	0.004283437	0.012360928	-0.107739814	0.433688191	0.603082717	-0.246227641	0.107524138	0.200839676	-0.61125788	0.002831438	0.008175918	0.257290424	0.041266765	0.074938288
ENSMUSG00000026032	Ndufb3	66495	NADH:ubiquinone oxidoreductase subunit B3 [Source:MGI Symbol;Acc:MGI:1913745]	3.402048616	3.349683161	3.416726272	3.217951808	3.476502013	3.162857187	3.318332373	3.344410252	3.254740458	3.276159719	3.392884789	3.278081961	0.020366248	0.866913709	0.912153695	-0.091750891	0.510479142	0.600523011	0.084354201	0.514520334	0.671133296	-0.027762938	0.840955057	0.897690768	-0.00739669	0.962122101	0.971704851	0.063987953	0.560136466	0.644744037
ENSMUSG00000059647	Cbx3-ps7		chromobox 3, pseudogene 7 [Source:MGI Symbol;Acc:MGI:3704187]	2.067885255	2.119637734	2.127443056	0.878633178	1.200342051	1.554622033	2.117074753	2.382251758	1.864271242	1.650071608	1.68936834	1.943636621	-0.384304219	0.078659143	0.159354588	-0.829754392	0.003941426	0.011575961	-0.022538014	0.916322796	0.954124231	-0.467988187	0.065175297	0.136852361	-0.852292407	0.00672814	0.016768446	0.361766205	0.069026622	0.115309984
ENSMUSG00000102059	Gm20257		predicted gene, 20257 [Source:MGI Symbol;Acc:MGI:5012442]	1.405213725	1.700194277	1.283079893	0.969611609	0.932351205	1.405249127	1.469186007	1.132557648	1.799970478	1.712757013	0.852714294	1.183329846	-0.246823268	0.42428868	0.555481891	-0.309006829	0.389658416	0.484787275	-0.010683708	0.973493806	0.985977842	-0.072867268	0.8367886	0.894342763	-0.319690536	0.424584906	0.513077027	0.236139561	0.401434695	0.492383082
ENSMUSG00000026031	Cflar	12633	CASP8 and FADD-like apoptosis regulator [Source:MGI Symbol;Acc:MGI:1336166]	7.54096232	7.557961528	7.742082218	9.079520815	8.23617339	8.487666244	7.596972381	7.586001053	7.815363391	7.673338705	7.870972102	7.949910844	0.149171745	0.376644799	0.511971581	0.892517171	0.000353115	0.001669932	-0.071904092	0.680324084	0.79978524	0.671441334	0.00289466	0.011798451	0.820613078	0.001955317	0.00603628	-0.221075837	0.143352295	0.211361716
ENSMUSG00000026029	Casp8	12370	caspase 8 [Source:MGI Symbol;Acc:MGI:1261423]	6.806086253	6.804944357	6.894218859	6.590870322	6.665799222	6.602690895	6.94338969	6.919387707	7.017862549	6.822659924	6.855059338	6.909035408	-0.103520691	0.257783783	0.386583169	-0.203558318	0.053986137	0.097399405	-0.131145671	0.177871693	0.334822976	-0.231183298	0.032723778	0.079894327	-0.334703989	0.010661717	0.024489513	-0.02762498	0.72087192	0.787106242
ENSMUSG00000102719	Gm37760		predicted gene, 37760 [Source:MGI Symbol;Acc:MGI:5610988]	-0.317313562	0.716155758	0.28866896	1.783335706	0.465126764	0.27547725	1.467648198	1.845326161	1.340003296	-0.46148018	1.820942148	0.711871879	-0.760692946	0.239273891	0.365865906	0.465358042	0.52626586	0.614780666	-1.363032702	0.058268436	0.15742223	-0.136981714	0.85112498	0.904515623	-0.89767466	0.281973173	0.368466873	-0.602339755	0.302742836	0.391884409
ENSMUSG00000026028	Trak2	70827	trafficking protein, kinesin binding 2 [Source:MGI Symbol;Acc:MGI:1918077]	4.759626179	4.769677956	5.004908522	5.870435129	5.656354466	5.446554977	4.816567233	4.718570895	5.023851403	5.393204595	5.355187876	5.47473345	0.542757226	0.001098066	0.006143511	0.780944605	0.000151727	0.000851975	-0.013798986	0.917827786	0.955409475	0.224388393	0.13370933	0.237773939	0.767145619	0.000498704	0.001960385	-0.556556212	0.00036223	0.001541698
ENSMUSG00000026027	Stradb	227154	STE20-related kinase adaptor beta [Source:MGI Symbol;Acc:MGI:2144047]	4.489830391	4.651608698	4.672993907	3.828447628	3.798911072	3.90441794	5.226213091	5.381054481	5.099969011	4.807746606	4.769099608	4.937287424	-0.414287219	0.003200984	0.013835738	-0.764169158	7.18082E-05	0.000474802	-0.631251519	0.000210843	0.002719618	-0.981133458	7.44416E-06	0.000126733	-1.395420677	8.17843E-07	1.42857E-05	-0.2169643	0.049481113	0.087188182
ENSMUSG00000038079	Tmem237	381259	transmembrane protein 237 [Source:MGI Symbol;Acc:MGI:2138365]	3.538271439	3.548257677	3.766166047	3.079552176	3.363806539	2.957599902	2.95398284	2.87130683	3.077780933	3.24033573	3.081026834	3.236755916	0.205673652	0.170670286	0.284389062	-0.476922206	0.012293637	0.029248708	0.651607722	0.001060593	0.008733085	-0.030988136	0.849708116	0.903493697	0.174685516	0.352551824	0.442026168	0.44593407	0.004617573	0.012279349
ENSMUSG00000026024	Als2	74018	alsin Rho guanine nucleotide exchange factor [Source:MGI Symbol;Acc:MGI:1921268]	4.55939256	4.703717522	4.706631515	4.832104428	4.822624679	4.535521815	4.672491286	4.589994975	4.761610861	4.614652654	4.521926676	4.502627699	-0.126528304	0.264842591	0.394593873	0.054228781	0.663416662	0.735529471	-0.012406889	0.915022313	0.953457093	0.168350196	0.192924279	0.314750921	0.041821892	0.766688489	0.819799606	0.114121415	0.259457968	0.344917712
ENSMUSG00000041075	Fzd7	14369	frizzled class receptor 7 [Source:MGI Symbol;Acc:MGI:108570]	4.994384927	5.530681566	5.225288138	6.616001266	5.559409977	5.572601596	5.223923089	5.3423434	5.056062117	6.292835435	6.180864099	6.013818296	0.964522976	0.000729561	0.004541965	0.510408224	0.048987468	0.08983946	0.073136717	0.745409945	0.848303019	-0.380978034	0.127098981	0.228490872	0.583544941	0.049124726	0.087279791	-0.891386259	0.000502955	0.002019961
ENSMUSG00000026021	Sumo1	22218	small ubiquitin-like modifier 1 [Source:MGI Symbol;Acc:MGI:1197010]	3.976645575	4.055717958	3.950274262	5.23610442	4.963045904	5.139547405	4.441580237	4.315327358	4.594291332	4.313102548	4.132309075	4.182006202	-0.24515452	0.057219219	0.124708093	1.094074209	4.16518E-06	5.33969E-05	-0.452754708	0.003407957	0.020773731	0.886474021	2.99928E-05	0.000351316	0.641319501	0.001168785	0.003937141	-0.207600187	0.069228811	0.115599199
ENSMUSG00000103821	D430013B06Rik		RIKEN cDNA D430013B06 gene [Source:MGI Symbol;Acc:MGI:3026994]	-0.97902728	-1.263522518	-0.426912704	1.781503658	0.428552138	0.509782729	-1.101404371	-0.531765771	-1.486521395	-0.516335117	0.214445374	0.403670664	1.051097197	0.042724442	0.100325886	1.621514101	0.011058037	0.02687043	0.154537413	0.755370348	0.854110766	0.724954317	0.201211536	0.324148365	1.776051514	0.012334518	0.027607623	-0.896559784	0.05472808	0.094892971
ENSMUSG00000026020	Nop58	55989	NOP58 ribonucleoprotein [Source:MGI Symbol;Acc:MGI:1933184]	4.847770114	4.364922421	4.719575071	6.246136353	6.195618474	6.313169558	4.697501431	4.678426608	4.749582855	6.23889189	6.109834621	6.326393591	1.500120687	3.04947E-07	1.28373E-05	1.630583456	3.8483E-07	9.52951E-06	-0.09085626	0.543295512	0.694914028	0.03960651	0.800269525	0.870914511	1.539727197	2.52645E-06	3.12255E-05	-1.590976946	4.66006E-08	1.6642E-06
ENSMUSG00000067336	Bmpr2	12168	bone morphogenetic protein receptor, type II (serine/threonine kinase) [Source:MGI Symbol;Acc:MGI:1095407]	7.815388123	8.211616587	8.075989519	8.311844625	8.392278114	8.351857712	8.051569168	8.138282343	7.979918481	8.178705515	8.157172849	8.200350198	0.11646366	0.361137603	0.496921908	0.294592021	0.048097311	0.0885577	0.007332786	0.95542541	0.976331965	0.185461147	0.190879135	0.312236701	0.301924807	0.074748168	0.123899482	-0.109130874	0.32486017	0.414184791
ENSMUSG00000041040	Fam117b	72750	family with sequence similarity 117, member B [Source:MGI Symbol;Acc:MGI:1920000]	6.748005047	6.993290008	6.649924516	4.905603985	5.660734347	5.784254561	7.476613686	7.538896955	7.307506992	7.339326787	7.272015756	7.258029123	-0.145580574	0.392053337	0.526782567	-1.281994078	1.72793E-05	0.000157448	-0.609925637	0.004524558	0.025385765	-1.746339141	9.14696E-07	3.24157E-05	-1.891919715	1.67385E-06	2.31374E-05	-0.464345063	0.007445572	0.018089172
ENSMUSG00000026019	Wdr12	57750	WD repeat domain 12 [Source:MGI Symbol;Acc:MGI:1927241]	4.127540318	3.543396042	3.706421701	4.027182526	4.018775575	3.912140368	4.043984581	4.051361772	3.902349815	4.053963569	4.146367247	3.89893578	0.058181186	0.723342135	0.80964225	0.198401288	0.297866763	0.391222943	-0.212130596	0.235537543	0.402817622	-0.071910494	0.699969478	0.797459863	-0.013729308	0.947853356	0.960730868	-0.270311782	0.086156676	0.138850179
ENSMUSG00000026017	Carf	241066	calcium response factor [Source:MGI Symbol;Acc:MGI:2182269]	3.829014433	3.591809975	3.560048854	1.981580702	2.748320215	2.321654937	3.48966684	3.372197642	3.551574737	2.910169064	3.460543904	2.991600891	-0.30614025	0.163029302	0.274920661	-1.241164467	0.00024108	0.001222454	0.18995117	0.398077312	0.570102545	-0.745073047	0.008527318	0.027415298	-1.051213297	0.00208098	0.006352224	0.49609142	0.020676692	0.042000382
ENSMUSG00000082609	Gm15464		predicted gene 15464 [Source:MGI Symbol;Acc:MGI:3646025]	1.263372977	1.200452093	1.137618226	1.552574638	1.659633589	1.65756087	0.347174152	0.485347863	0.084131344	0.878439694	0.614847654	0.63668868	0.400269743	0.092626722	0.181337432	0.436471572	0.112044596	0.177685335	0.894936455	0.002470153	0.01638747	0.931138284	0.003652363	0.014172801	1.331408027	0.000629063	0.002357044	0.494666712	0.029606134	0.056550037
ENSMUSG00000073664	Nbeal1	269198	neurobeachin like 1 [Source:MGI Symbol;Acc:MGI:2444343]	5.211674209	5.545384044	5.629280757	6.011970092	5.821155833	5.619360538	5.717879781	5.876998412	5.657464715	5.185655692	5.47163537	5.462716965	-0.38354572	0.024639543	0.065926913	0.313058921	0.082197691	0.137840611	-0.285022793	0.094013224	0.217129129	0.411581849	0.028841506	0.072153107	0.028036128	0.88354451	0.913326909	0.098522927	0.464578102	0.555414715
ENSMUSG00000049439	Cyp20a1	77951	cytochrome P450, family 20, subfamily a, polypeptide 1 [Source:MGI Symbol;Acc:MGI:1925201]	4.701523933	4.719591341	4.81675867	4.670289251	4.828054386	4.677264123	4.837562561	4.970339182	4.683988639	4.662789932	4.671559603	4.730746946	-0.148010701	0.178820468	0.294331645	-0.009530069	0.935929987	0.95217425	-0.086412957	0.443586286	0.611495409	0.052067675	0.662231066	0.768050924	-0.095943026	0.480887211	0.566671061	0.061597745	0.515831585	0.603599425
ENSMUSG00000026782	Abi2	329165	abl-interactor 2 [Source:MGI Symbol;Acc:MGI:106913]	5.223671645	5.517282927	5.309356642	5.057079714	5.351006692	5.249850279	5.545628644	5.438215098	5.662745441	5.540631101	5.509725785	5.465103529	-0.039276496	0.734765541	0.818476578	-0.114595482	0.381485478	0.476539543	-0.181707291	0.155725774	0.305743614	-0.257026277	0.065693028	0.137648198	-0.296302773	0.063299572	0.107845721	-0.142430795	0.181382901	0.257277033
ENSMUSG00000026014	Raph1	77300	Ras association (RalGDS/AF-6) and pleckstrin homology domains 1 [Source:MGI Symbol;Acc:MGI:1924550]	2.877895781	3.359377455	3.068130139	4.577040367	3.199708054	3.045040321	3.415067402	3.575983697	3.207519423	2.919088238	3.235572302	2.742003406	-0.397815742	0.168116679	0.281314973	0.328533935	0.307059695	0.400607934	-0.293003124	0.325188753	0.500501014	0.433346552	0.185934544	0.306115512	0.03553081	0.920042077	0.940791702	0.104812617	0.673388938	0.746347466
ENSMUSG00000101188	Eif4a-ps4		eukaryotic translation initiation factor 4A, pseudogene 4 [Source:MGI Symbol;Acc:MGI:1195958]	6.009100094	6.013197527	6.097925253	7.208814374	7.159613265	7.179980447	5.947547746	6.107798866	5.770262712	6.925903095	6.886533026	6.988474116	0.982721693	1.14733E-06	3.62242E-05	1.139616072	6.28929E-07	1.34004E-05	0.092986154	0.407429991	0.578852264	0.249880533	0.048034588	0.107715335	1.232602226	1.18885E-06	1.84265E-05	-0.88973554	7.81434E-07	1.45324E-05
ENSMUSG00000081382	Rpl18-ps1		ribosomal protein L18, pseudogene 1 [Source:MGI Symbol;Acc:MGI:98018]	4.146232989	3.809458144	3.923163051	4.316058333	4.085176611	4.166303463	3.248265563	3.275800587	3.204484005	3.150736662	3.449262059	3.247164376	0.057150938	0.690372608	0.785349931	0.213292723	0.20583781	0.290599477	0.710916749	0.000534273	0.005331978	0.867058534	0.000198922	0.001472217	0.924209472	0.000314082	0.001345254	0.653765811	0.000285962	0.001279004
ENSMUSG00000026009	Icos	54167	inducible T cell co-stimulator [Source:MGI Symbol;Acc:MGI:1858745]	2.077024288	0.875512281	1.262291964	-1.499636193	-0.56039639	-1.609791161	0.93459511	0.624768564	0.963478661	1.040594731	1.195065071	0.436267057	0.125700792	0.747914161	0.82729704	-2.640697403	9.57944E-05	0.000591719	0.605044449	0.160872755	0.312740598	-2.161353746	0.000503729	0.002980586	-2.035652953	0.001725198	0.005439504	0.479343657	0.19523732	0.273424374
ENSMUSG00000052062	Pard3b	72823	par-3 family cell polarity regulator beta [Source:MGI Symbol;Acc:MGI:1919301]	2.674117859	2.653741889	2.617029064	3.007474531	2.511674136	2.642454067	3.515643995	3.487643414	3.538543026	3.610342963	3.55718884	3.503211713	0.04686517	0.715767674	0.803965438	0.022840209	0.875739526	0.906067886	-0.865418305	4.2129E-05	0.000839678	-0.889443267	6.50659E-05	0.000633424	-0.842578096	0.00027938	0.001226657	-0.912283475	5.82102E-06	6.63376E-05
ENSMUSG00000025969	Nrp2	18187	neuropilin 2 [Source:MGI Symbol;Acc:MGI:1100492]	6.700643477	6.762013973	6.974406977	9.145383186	8.75620054	9.010866814	6.355132203	6.463837376	6.378388962	7.225569364	7.051355381	7.415972199	0.798028352	0.000125813	0.001222235	2.117710096	2.22908E-08	1.41399E-06	0.398152256	0.019256277	0.072495448	1.717834	2.0122E-07	1.19972E-05	2.515862352	1.67702E-08	8.35022E-07	-0.399876096	0.006729045	0.016627517
ENSMUSG00000103032	Gm37121		predicted gene, 37121 [Source:MGI Symbol;Acc:MGI:5610349]	1.091577287	0.421416599	0.940197092	4.138664148	3.725254289	3.43924098	0.753180486	0.933548239	0.593204322	1.281452351	2.292092056	1.774966256	1.070192481	0.006581864	0.024209624	2.861456175	9.19955E-06	9.53204E-05	0.069580407	0.840914005	0.910025083	1.860844101	0.000393644	0.002481173	2.931036582	2.08138E-05	0.00015579	-1.000612074	0.005534399	0.014214063
ENSMUSG00000040865	Ino80d	227195	INO80 complex subunit D [Source:MGI Symbol;Acc:MGI:3027003]	6.680227839	6.829797824	6.910638801	7.456913087	7.140823645	7.141158888	7.062876649	7.035382894	7.2388658	6.774480709	7.015199752	7.001109221	-0.188126674	0.154460175	0.26477798	0.394150099	0.013305004	0.031132408	-0.307659057	0.036429501	0.112963978	0.274617716	0.065459851	0.137346058	0.086491043	0.587054684	0.665526658	-0.119532383	0.287044217	0.374705719
ENSMUSG00000084799	Ino80dos		INO80 complex subunit D, opposite strand [Source:MGI Symbol;Acc:MGI:3651861]	0.31918242	1.262842674	0.881236572	-0.65671757	0.589852865	-0.966022899	0.481296955	0.954929828	-0.260121246	0.709942927	0.599391121	0.324990425	0.17033457	0.692687342	0.786820324	-1.14443949	0.038862971	0.074302834	0.40736272	0.377195657	0.550664627	-0.907411341	0.090799114	0.176170572	-0.73707677	0.203170559	0.281496331	0.237028149	0.548057357	0.633570176
ENSMUSG00000101599	Gm20342		predicted gene, 20342 [Source:MGI Symbol;Acc:MGI:5012527]	2.656488676	2.725532242	2.637868001	2.18943829	1.634386206	1.673222039	2.691970031	2.499274895	2.990191608	2.387578395	2.840370041	2.511353612	-0.119251647	0.55540645	0.672803139	-0.902792531	0.001979581	0.006726333	-0.054553703	0.797047018	0.881937312	-0.838094588	0.003276732	0.013031882	-0.957346234	0.002957391	0.008474911	0.064697943	0.72093944	0.787118099
ENSMUSG00000025968	Ndufs1	227197	NADH:ubiquinone oxidoreductase core subunit S1 [Source:MGI Symbol;Acc:MGI:2443241]	5.218802376	5.240563885	5.372850933	4.968150873	5.323564999	5.26537082	5.277378484	5.288561205	5.335520112	5.318246361	5.336303223	5.504286873	0.071069383	0.512031032	0.636009934	-0.051336003	0.669200258	0.740110659	-0.027983929	0.805047995	0.887003827	-0.150389315	0.225076007	0.352946821	-0.079319932	0.56388566	0.644809668	-0.099053312	0.308662629	0.397952783
ENSMUSG00000025967	Eef1b2	55949	eukaryotic translation elongation factor 1 beta 2 [Source:MGI Symbol;Acc:MGI:1929520]	6.624354983	6.304030861	6.429088952	6.947408102	6.900143509	6.804838847	5.634632751	5.57341383	5.645532433	6.094597563	6.059368066	5.998163013	0.44079061	0.001478052	0.007748337	0.44583695	0.002571626	0.008281183	0.817531452	1.35268E-05	0.000382708	0.822577792	1.88882E-05	0.000249189	1.263368402	1.16929E-06	1.82309E-05	0.376740842	0.001725623	0.005459429
ENSMUSG00000098850	Gm27390		predicted gene, 27390 [Source:MGI Symbol;Acc:MGI:5530772]	0.105059233	-0.312893636	-0.266689846	0.500651694	-0.255505039	0.402940212	-1.243635579	-1.124051112	-1.448178185	0.62908698	0.39044622	0.448745549	1.753870865	0.000181372	0.001619297	0.340979059	0.37488786	0.469818868	1.11788759	0.006638215	0.033631684	-0.295004216	0.441912789	0.579919978	1.458866649	0.004619298	0.012241757	-0.635983275	0.050131606	0.088144319
ENSMUSG00000081643	Gm11605		predicted gene 11605 [Source:MGI Symbol;Acc:MGI:3651339]	2.910681302	2.754891802	2.669423357	2.324738262	2.961944272	2.82980164	2.496213244	2.449814154	2.447992226	2.436897232	2.439680991	2.313971964	-0.053619814	0.732958906	0.817655595	-0.004046295	0.981956466	0.986572592	0.316005272	0.076656124	0.188746345	0.365578792	0.060869126	0.129851644	0.311958977	0.141471725	0.21017273	0.369625086	0.021386877	0.043146456
ENSMUSG00000025964	Adam23	23792	a disintegrin and metallopeptidase domain 23 [Source:MGI Symbol;Acc:MGI:1345162]	-6.660262441	-1.541912315	-5.378475958	-1.414232177	0.473838188	0.399970327	-2.685791022	-1.718339665	-3.855883411	0.367239725	1.570144318	0.438226298	3.630020064	0.012006801	0.038116653	4.640746936	0.006729719	0.017770243	-1.867219363	0.170914422	0.325788029	-0.856492491	0.552457131	0.677262131	2.773527573	0.10336755	0.161922888	-5.497239427	0.000391672	0.001647321
ENSMUSG00000025962	Fastkd2	75619	FAST kinase domains 2 [Source:MGI Symbol;Acc:MGI:1922869]	4.572695124	4.44427994	4.286931093	4.629910285	4.636747057	4.743200791	4.319491282	4.198294997	4.349804565	4.597956994	4.377835939	4.297194998	0.145448742	0.267928836	0.39752936	0.245015054	0.109340981	0.174033559	0.149541277	0.279763164	0.451967656	0.249107589	0.10447712	0.196906275	0.394556331	0.030758324	0.059075713	0.004092535	0.971313046	0.979420161
ENSMUSG00000025959	Klf7	93691	Kruppel-like factor 7 (ubiquitous) [Source:MGI Symbol;Acc:MGI:1935151]	5.843035396	6.064367831	6.123078952	8.185899577	7.042116849	7.179493198	6.131715316	6.016379654	6.400097098	7.428493021	7.242563341	7.357538584	1.144729005	0.000110594	0.001113315	1.309668044	7.23313E-05	0.000477579	-0.167687499	0.431812256	0.601072444	-0.002748459	0.989964763	0.994629237	1.141980545	0.000713162	0.002620272	-1.312416504	9.19741E-06	9.34283E-05
ENSMUSG00000025958	Creb1	12912	cAMP responsive element binding protein 1 [Source:MGI Symbol;Acc:MGI:88494]	6.521644108	6.713945282	6.632497255	7.635112196	7.406733472	7.688609348	6.815383316	6.855385859	6.872265955	6.456046542	6.584495616	6.628449038	-0.299968692	0.016521357	0.048553986	0.914532754	7.2805E-06	8.0526E-05	-0.216897898	0.077869282	0.190850883	0.997603548	3.26095E-06	7.65221E-05	0.697634856	0.000283277	0.001241416	0.083070794	0.387325409	0.47828663
ENSMUSG00000025956	Mettl21a	67099	methyltransferase like 21A [Source:MGI Symbol;Acc:MGI:1914349]	4.598663933	4.731998029	4.489379639	2.229825102	2.853074275	2.952444819	4.893780554	4.999978811	4.667816926	4.306570416	4.05108397	4.145672441	-0.69171359	0.001072221	0.006015873	-1.852746704	4.93388E-07	1.12919E-05	-0.240626508	0.175294404	0.33163419	-1.401659621	7.62775E-06	0.000128911	-2.093373211	5.01498E-07	9.81034E-06	0.451087082	0.008341454	0.019855977
ENSMUSG00000070871	Ccnyl1	227210	cyclin Y-like 1 [Source:MGI Symbol;Acc:MGI:2138614]	3.313555192	3.61785535	3.748626722	4.00372908	3.733711408	3.942397662	3.549722247	3.489674438	3.855886064	3.338839793	3.449273385	3.758222863	-0.146483165	0.4162032	0.548462802	0.307136349	0.147030875	0.221631176	-0.075528777	0.687606002	0.80537795	0.378090737	0.081488834	0.162183794	0.231607572	0.319801738	0.408283637	0.070954389	0.656900891	0.732279504
ENSMUSG00000045005	Fzd5	14367	frizzled class receptor 5 [Source:MGI Symbol;Acc:MGI:108571]	3.273416332	3.671595083	3.376260775	3.791703457	3.285579573	3.748953009	3.477248315	3.649607113	3.315902721	2.517858959	2.475067798	2.543076916	-0.97860089	9.87269E-05	0.001022754	0.133290105	0.492592375	0.583981334	-0.040628972	0.819786591	0.896396048	1.071262023	0.000138981	0.001117962	0.092661133	0.670138239	0.738619519	0.937971918	5.60987E-05	0.000361132
ENSMUSG00000051344	Plekhm3	241075	pleckstrin homology domain containing, family M, member 3 [Source:MGI Symbol;Acc:MGI:2443627]	6.034085126	6.319041577	6.04909388	4.850602938	4.893590679	5.017301217	6.238057621	6.214938608	6.244070924	5.713789689	5.653453586	5.616179612	-0.567914006	0.000231542	0.001934207	-1.225008781	4.68694E-07	1.09064E-05	-0.076854093	0.505705112	0.664381086	-0.733948867	6.13268E-05	0.000603365	-1.301862873	9.97085E-07	1.63536E-05	0.491059913	0.000262896	0.001199785
ENSMUSG00000084416	Rpl10a-ps1		ribosomal protein L10A, pseudogene 1 [Source:MGI Symbol;Acc:MGI:3705885]	6.148942985	5.909214119	6.126836745	6.229558114	6.299828774	6.167431147	5.00961579	5.068907203	4.975197494	4.961031867	5.25169563	5.171451781	0.115242467	0.35163712	0.487567909	0.188719827	0.179047504	0.259258696	1.026896505	5.07364E-06	0.000189471	1.100373866	4.2885E-06	8.86545E-05	1.215616332	5.89385E-06	5.95471E-05	0.911654038	2.8432E-06	3.82729E-05
ENSMUSG00000025950	Idh1	15926	isocitrate dehydrogenase 1 (NADP+), soluble [Source:MGI Symbol;Acc:MGI:96413]	4.56652348	4.832857906	4.379918331	2.418834563	3.32694504	3.056296917	4.741377955	4.602898391	4.789750446	3.898474664	4.177323945	3.772651649	-0.723660162	0.003197576	0.013825311	-1.572510753	1.73631E-05	0.000157859	-0.105135192	0.615657475	0.751622607	-0.953985782	0.001119917	0.005590328	-1.677645945	2.96631E-05	0.000206867	0.618524971	0.004263677	0.011496701
ENSMUSG00000025949	Pikfyve	18711	phosphoinositide kinase, FYVE type zinc finger containing [Source:MGI Symbol;Acc:MGI:1335106]	6.002607191	6.089775197	6.080025383	6.064334975	5.916381157	5.976457353	6.111672137	6.077004776	6.224696183	5.821165316	5.979939822	5.944571485	-0.223019578	0.035837654	0.087542937	-0.092971125	0.3843782	0.479592416	-0.079483727	0.435754566	0.6051082	0.050564726	0.632322667	0.744173712	-0.172454852	0.171314552	0.245249562	0.143535851	0.10679824	0.165197767
ENSMUSG00000015222	Map2	17756	microtubule-associated protein 2 [Source:MGI Symbol;Acc:MGI:97175]	0.977976853	0.253864024	-0.619923255	2.075239012	1.057382522	2.543227585	0.714138117	1.126956452	-0.286238965	2.992412947	2.644207992	1.922086797	2.062892805	0.002243442	0.010567456	1.723333637	0.015786972	0.035858832	-0.32240382	0.570092933	0.716631834	-0.661962988	0.297465165	0.433618685	1.400929817	0.06235267	0.106517867	-2.385296625	0.00038362	0.001617864
ENSMUSG00000055567	Unc80	329178	unc-80, NALCN activator [Source:MGI Symbol;Acc:MGI:2652882]	0.013862975	-5.388445161	-1.472138205	0.338792933	0.36379345	0.71974663	-1.457247217	-2.450600177	0.01482104	1.153006946	2.087110902	2.666503758	3.242830177	0.019975033	0.056054107	2.66068103	0.080425714	0.135328732	-0.850437281	0.512820147	0.670124869	-1.432586428	0.323495857	0.461538918	1.810243749	0.265982618	0.350913656	-4.093267458	0.003075269	0.008788651
ENSMUSG00000026005	Rpe	66646	ribulose-5-phosphate-3-epimerase [Source:MGI Symbol;Acc:MGI:1913896]	3.907958489	4.072933634	3.964451719	3.942556844	4.126482505	4.015097354	3.964566571	4.029877548	3.877303763	4.074482247	4.207825494	4.108781017	0.180971738	0.120102736	0.219450998	0.058257942	0.641221847	0.715375353	0.027493693	0.812784363	0.891783074	-0.095220103	0.450570707	0.587742177	0.085751635	0.545524976	0.627977541	-0.153478045	0.138501784	0.205321394
ENSMUSG00000026004	Kansl1l	68691	KAT8 regulatory NSL complex subunit 1-like [Source:MGI Symbol;Acc:MGI:1915941]	5.075534365	5.212583383	5.263041502	5.174027585	4.974210987	4.7423993	5.29987227	5.328010433	5.262504822	4.981984668	4.85491676	4.885161104	-0.392909671	0.003696748	0.015454478	-0.257931136	0.054402565	0.098061558	-0.108763926	0.356352132	0.531734029	0.026214609	0.83094399	0.891250302	-0.366695062	0.021040359	0.042933706	0.284145745	0.01226856	0.02721297
ENSMUSG00000103756	Gm37285		predicted gene, 37285 [Source:MGI Symbol;Acc:MGI:5610513]	-0.254012329	-1.58044573	-0.50005399	1.043759933	-0.858629967	-0.185404998	-0.270482436	-0.495182272	0.222112018	-0.103148615	0.417040479	0.481339729	0.444469721	0.380464363	0.515851155	0.579479811	0.326078622	0.420817231	-0.56618527	0.293195373	0.46698809	-0.43117518	0.461757767	0.597832143	0.013294541	0.983544074	0.98730405	-1.010654991	0.04316192	0.077800102
ENSMUSG00000026003	Acadl	11363	acyl-Coenzyme A dehydrogenase, long-chain [Source:MGI Symbol;Acc:MGI:87866]	4.159651573	4.129234643	4.224953312	4.554839675	4.656069501	4.520563365	4.485404789	4.443754179	4.539732273	4.245630422	4.151132392	4.226448181	-0.287711125	0.01229977	0.038851389	0.411139026	0.003045462	0.009469823	-0.318630226	0.009453929	0.043647055	0.380219925	0.005032917	0.018099217	0.0925088	0.468033004	0.554581584	-0.030919101	0.725924377	0.790650291
ENSMUSG00000082769	Gm15793		predicted gene 15793 [Source:MGI Symbol;Acc:MGI:3783235]	0.716814677	0.501449619	0.431905718	0.753115713	0.164378077	0.801649949	-0.097327964	-0.071958685	-0.256749615	0.10585622	-0.906528096	-0.493753926	-0.331015379	0.385225678	0.519985257	0.012329645	0.977367822	0.983384789	0.695691824	0.098876254	0.224626151	1.039036847	0.032944641	0.080222229	0.708021469	0.163798937	0.236489105	1.026707203	0.010442361	0.023859421
ENSMUSG00000094191	Rpl31-ps14		ribosomal protein L31, pseudogene 14 [Source:MGI Symbol;Acc:MGI:3704189]	1.575943895	1.019044555	1.219931682	1.474762497	1.477808311	1.667843337	0.461363043	0.267866608	0.639364264	0.748037244	0.634831176	0.632771554	0.21908421	0.364340462	0.500092755	0.274946244	0.328983152	0.423797659	0.831904344	0.005886366	0.030756782	0.887766378	0.007201191	0.023921317	1.106850588	0.003601402	0.009958213	0.612820134	0.01431113	0.030895139
ENSMUSG00000026000	Lancl1	14768	LanC (bacterial lantibiotic synthetase component C)-like 1 [Source:MGI Symbol;Acc:MGI:1336997]	4.429291379	4.004739124	4.403776403	3.44477706	4.107699007	3.830420774	4.288859892	4.162899019	4.523392714	3.961429667	4.358776268	4.350470937	-0.098849981	0.614147091	0.723186014	-0.412609847	0.081789184	0.137240651	-0.057932144	0.778612169	0.869701717	-0.371692011	0.112698714	0.207806017	-0.470541991	0.07972478	0.13083717	0.040917836	0.814529123	0.862786014
ENSMUSG00000025997	Ikzf2	22779	IKAROS family zinc finger 2 [Source:MGI Symbol;Acc:MGI:1342541]	3.384379848	3.895019794	3.709138628	3.544779591	4.026299196	3.82131214	3.781196705	3.692110852	3.886761543	3.944038539	3.470487975	3.755531802	-0.087245731	0.649314353	0.75137651	0.16954768	0.440266166	0.534911455	-0.113010819	0.577627453	0.721813491	0.143782593	0.511716598	0.642687549	0.056536862	0.81749417	0.86276905	-0.025765087	0.88033268	0.913678116
ENSMUSG00000026196	Bard1	12021	BRCA1 associated RING domain 1 [Source:MGI Symbol;Acc:MGI:1328361]	2.531880014	1.673578491	1.916967542	0.654205155	1.165508003	1.879875497	1.295401986	1.145396004	1.468936057	1.266580743	1.353103533	1.486533249	0.059558802	0.836401335	0.892418383	-0.697586222	0.055445049	0.099720692	0.748555741	0.028773938	0.095605726	-0.008589283	0.979450194	0.987625905	0.050969519	0.891295465	0.918809483	0.688996939	0.020875848	0.042312121
ENSMUSG00000026192	Atic	108147	5-aminoimidazole-4-carboxamide ribonucleotide formyltransferase/IMP cyclohydrolase [Source:MGI Symbol;Acc:MGI:1351352]	5.214790416	5.447484839	5.352860285	5.263191167	5.701352539	5.568782655	5.396999469	5.46043107	5.274879104	5.67879437	5.408137946	5.559622118	0.161093363	0.228342686	0.35415168	0.20901658	0.164784904	0.24288508	-0.026102359	0.848220116	0.913846386	0.021820858	0.879404883	0.923216623	0.182914221	0.27807002	0.364188622	-0.187195722	0.121412752	0.183732674
ENSMUSG00000026193	Fn1	14268	fibronectin 1 [Source:MGI Symbol;Acc:MGI:95566]	4.333144885	5.507910428	4.51658126	5.872425154	6.172411026	6.683004263	-0.636369309	2.037989237	-4.363178719	2.24671723	1.060357437	1.508652854	2.533441934	0.082273876	0.164951463	1.522860752	0.33002313	0.424822213	5.763055588	0.00229856	0.01543335	4.752474406	0.01075876	0.033027882	7.285916339	0.001815558	0.005667805	3.229613654	0.021882919	0.043930276
ENSMUSG00000101496	Gm8885		predicted gene 8885 [Source:MGI Symbol;Acc:MGI:3649121]	0.568559162	-0.041752978	0.33991487	0.526569317	0.936489972	0.758524855	-0.137501887	-0.069390469	-0.272111618	-0.023005956	0.056487042	0.034581705	0.186068335	0.526071146	0.648118159	0.467186635	0.184615607	0.265825043	0.465436229	0.148575207	0.296460811	0.746554529	0.045508638	0.103369196	0.932622864	0.027945603	0.05446413	0.279367895	0.303363024	0.39246779
ENSMUSG00000026189	Pecr	111175	peroxisomal trans-2-enoyl-CoA reductase [Source:MGI Symbol;Acc:MGI:2148199]	3.746980369	3.893010826	3.998908586	2.554840322	3.467165782	3.015804857	3.442546709	3.427346456	3.514778357	3.576510099	3.754523438	3.816702903	0.249924413	0.155282114	0.265891671	-0.790233952	0.001366604	0.004964661	0.419215249	0.033652908	0.106762294	-0.620943116	0.006659118	0.022497194	-0.371018703	0.104915889	0.163873569	0.169290836	0.273258509	0.359752389
ENSMUSG00000026187	Xrcc5	22596	X-ray repair complementing defective repair in Chinese hamster cells 5 [Source:MGI Symbol;Acc:MGI:104517]	3.045833315	3.833660908	3.3103238	2.657726313	3.289692438	3.249379784	3.383692688	3.323851713	3.422339463	4.258503037	3.842668308	4.016919238	0.648112715	0.013711492	0.042126451	-0.271750883	0.302466284	0.395916481	0.034854809	0.883993782	0.93535222	-0.885008788	0.004819307	0.017498644	-0.236896073	0.421362613	0.509896055	-0.613257905	0.010248233	0.023504781
ENSMUSG00000039354	Smarcal1	54380	SWI/SNF related matrix associated, actin dependent regulator of chromatin, subfamily a-like 1 [Source:MGI Symbol;Acc:MGI:1859183]	5.567158519	5.373697072	5.250612328	4.64345881	4.738547806	4.794642682	5.355904958	5.392793101	5.177697702	5.287292585	5.244737476	5.086454027	-0.085783935	0.475269393	0.603348479	-0.652145928	0.000383821	0.0017821	0.089502495	0.480114459	0.642248442	-0.476859498	0.003647526	0.014157985	-0.562643433	0.002888834	0.008319171	0.175286431	0.116198504	0.177115385
ENSMUSG00000046330	Rpl37a	19981	ribosomal protein L37a [Source:MGI Symbol;Acc:MGI:98068]	6.006648937	5.720693855	5.654149017	6.089269374	5.846854897	6.013466515	4.791348647	4.800544287	4.65931507	5.12644902	5.022764885	4.897383259	0.278846398	0.043797002	0.102217464	0.177426687	0.22022881	0.306554973	1.039748503	6.21335E-06	0.000219633	0.938328792	2.69324E-05	0.000326194	1.21717519	8.12682E-06	7.60254E-05	0.760902105	2.20335E-05	0.000179595
ENSMUSG00000026185	Igfbp5	16011	insulin-like growth factor binding protein 5 [Source:MGI Symbol;Acc:MGI:96440]	0.406414333	0.359977361	-0.658319414	0.560751325	0.915782884	1.783274496	-1.399837777	-3.067621238	0.456990157	1.711066052	1.562425016	0.987832625	2.828629105	0.002240986	0.010560306	1.204071642	0.175156266	0.254926229	1.371901153	0.095925381	0.219972829	-0.25265631	0.767384395	0.847669056	2.575972795	0.017964886	0.03755729	-1.456727952	0.046890723	0.083299991
ENSMUSG00000055322	Tns1	21961	tensin 1 [Source:MGI Symbol;Acc:MGI:104552]	7.889670635	7.89949599	8.002536455	10.02178686	9.65605709	10.01120827	7.947049869	8.009725726	7.962089628	8.994077787	8.71263429	9.048310317	0.917047297	3.56218E-05	0.000470398	1.927641125	5.502E-08	2.45777E-06	-0.052331853	0.723925563	0.832514397	0.958261975	5.15958E-05	0.000527424	1.875309272	3.26033E-07	7.39707E-06	-0.96937915	5.65371E-06	6.49102E-05
ENSMUSG00000006304	Arpc2	76709	actin related protein 2/3 complex, subunit 2 [Source:MGI Symbol;Acc:MGI:1923959]	7.887031248	7.929153157	7.97642665	8.535040897	8.488424666	8.50929472	7.832547501	7.80138916	7.903921897	8.643324886	8.525511057	8.643816479	0.74856068	8.50438E-06	0.000157524	0.573557749	0.000186504	0.001001898	0.084005933	0.422806748	0.592817052	-0.090996997	0.403410616	0.542252567	0.657563682	0.00020194	0.000945519	-0.664554746	6.75257E-06	7.4273E-05
ENSMUSG00000006299	Aamp	227290	angio-associated migratory protein [Source:MGI Symbol;Acc:MGI:107809]	6.223821501	6.297542198	6.361948324	6.577973983	6.549836046	6.66487122	6.415293731	6.448087845	6.50185516	6.4235868	6.670595617	6.705684997	0.136567295	0.232700513	0.358707893	0.299039212	0.027802547	0.056657324	-0.166629507	0.17076403	0.325590709	-0.00415759	0.972598466	0.983501084	0.132409705	0.351516982	0.441047138	-0.303196802	0.008171672	0.019508656
ENSMUSG00000026179	Pnkd	56695	paroxysmal nonkinesiogenic dyskinesia [Source:MGI Symbol;Acc:MGI:1930773]	2.724089398	2.703879963	2.815566215	2.64603844	2.224239192	2.829019798	2.637097064	2.949113685	2.448274888	2.215994849	2.725026391	2.824156764	-0.103012439	0.647466024	0.749857631	-0.192360693	0.457784191	0.551680365	0.057694839	0.807644516	0.888485716	-0.031653415	0.901633255	0.938019044	-0.134665854	0.641796837	0.714067088	0.160707278	0.432210591	0.524252993
ENSMUSG00000006301	Tmbim1	69660	transmembrane BAX inhibitor motif containing 1 [Source:MGI Symbol;Acc:MGI:1916910]	6.009172214	5.825820302	6.043756184	7.265942866	7.077953557	7.272098328	5.677966872	5.588130529	5.897291234	6.596752399	6.534328527	6.750674866	0.886601498	1.53935E-05	0.000246935	1.243675277	1.43198E-06	2.52449E-05	0.215194376	0.120144391	0.255883306	0.572268155	0.001260765	0.006132545	1.458869653	1.19043E-06	1.84265E-05	-0.671407122	5.5556E-05	0.000358469
ENSMUSG00000073650	Catip	241112	ciliogenesis associated TTC17 interacting protein [Source:MGI Symbol;Acc:MGI:2685062]	0.984852247	0.47620875	0.51076804	-3.134618106	-0.813464381	-2.153381247	-0.248655173	0.175057517	-1.143028663	-0.274131682	-0.155478594	-0.703049307	0.07782181	0.875803067	0.917822486	-2.541720746	0.000892642	0.003531922	1.074105375	0.060214608	0.161486743	-1.54543718	0.019516498	0.053057376	-1.46761537	0.03997665	0.0734889	0.996283565	0.04574507	0.081546325
ENSMUSG00000026177	Slc11a1	18173	solute carrier family 11 (proton-coupled divalent metal ion transporters), member 1 [Source:MGI Symbol;Acc:MGI:1345275]	8.581328141	8.691323538	8.603439769	8.711365605	8.789002097	8.785958628	8.04857409	8.07449657	7.985215738	8.110519803	8.017384461	8.032319754	0.017477808	0.858625753	0.906842555	0.135189225	0.219941243	0.306277441	0.60212625	9.10149E-05	0.0014685	0.719837668	2.60595E-05	0.000317839	0.737315476	7.44232E-05	0.000433314	0.584648443	2.16214E-05	0.000177365
ENSMUSG00000026176	Ctdsp1	227292	CTD (carboxy-terminal domain, RNA polymerase II, polypeptide A) small phosphatase 1 [Source:MGI Symbol;Acc:MGI:2654470]	6.026798884	6.100241793	6.132614426	5.938574658	5.936073099	5.88822237	6.176250524	6.216097607	6.151857831	6.140468324	6.131356725	6.177368789	-0.036422021	0.663973878	0.764139269	-0.170053096	0.084171556	0.140435253	-0.093569776	0.299347708	0.473329902	-0.227200851	0.027856535	0.070328338	-0.263622872	0.026509116	0.052125215	-0.057147755	0.440223873	0.532160638
ENSMUSG00000033364	Usp37	319651	ubiquitin specific peptidase 37 [Source:MGI Symbol;Acc:MGI:2442483]	5.184297917	5.335577275	5.252701949	5.799066696	5.970892838	6.104301038	5.623708632	5.673627205	5.580694684	5.88395918	5.778467894	5.90821396	0.220201276	0.044834037	0.104118095	0.716652395	3.61851E-05	0.000277879	-0.361688862	0.004751198	0.026275723	0.134762257	0.23737676	0.367220262	0.354963533	0.014983642	0.03231412	-0.581890138	2.9936E-05	0.000225405
ENSMUSG00000026174	Cnot9	58184	CCR4-NOT transcription complex, subunit 9 [Source:MGI Symbol;Acc:MGI:1928902]	5.157167533	5.286402566	5.145909579	5.181907879	5.202049272	5.162337149	5.358224055	5.281373606	5.417338364	5.024410868	4.962969518	4.900012815	-0.383677156	0.00157603	0.008111969	-0.019524908	0.853077047	0.888177047	-0.147143325	0.15822352	0.308974014	0.217008923	0.058984685	0.126805207	-0.166668232	0.182803951	0.258579828	0.236533831	0.014529651	0.031280512
ENSMUSG00000026135	Zfp142	77264	zinc finger protein 142 [Source:MGI Symbol;Acc:MGI:1924514]	5.350223949	5.278549857	5.473330536	5.596274414	5.433324917	5.481420817	5.605168056	5.507668868	5.804521206	5.350996985	5.19597671	5.416080119	-0.337234243	0.013766474	0.042226508	0.124184969	0.353759984	0.448479075	-0.280830298	0.041274482	0.124055238	0.180588913	0.186981945	0.307511653	-0.15664533	0.307321107	0.394830743	0.056403944	0.590670999	0.672645423
ENSMUSG00000026172	Bcs1l	66821	BCS1-like (yeast) [Source:MGI Symbol;Acc:MGI:1914071]	3.115939773	3.623421489	3.128077755	2.253616373	2.575726437	2.947519515	3.262251133	3.422454698	3.082704289	2.772110569	2.952576128	2.886790442	-0.381305532	0.072037017	0.148786537	-0.640716722	0.013511522	0.031525372	0.035014838	0.865685521	0.923123455	-0.224396352	0.326233264	0.464537977	-0.605701884	0.03152608	0.060301957	0.41632037	0.034069693	0.063734832
ENSMUSG00000026171	Rnf25	57751	ring finger protein 25 [Source:MGI Symbol;Acc:MGI:1890215]	4.203525527	3.942263411	4.370081946	4.26763935	4.294526583	4.312748844	4.351746292	4.325584018	4.544747382	3.955553034	4.143674129	4.371097511	-0.271448788	0.105880403	0.199809609	0.129112314	0.47428854	0.567105492	-0.248632652	0.154539336	0.304260268	0.151928449	0.402399785	0.541312852	-0.119520339	0.556685142	0.637917181	0.022816136	0.871451584	0.907426858
ENSMUSG00000033276	Stk36	269209	serine/threonine kinase 36 [Source:MGI Symbol;Acc:MGI:1920831]	2.124479557	2.875544988	2.271360638	0.380742182	1.345622301	1.313664252	1.627359788	1.730855121	1.573394473	0.823044962	1.580987642	1.250579767	-0.395497369	0.21054166	0.332860446	-1.286096413	0.003247653	0.009945472	0.759517628	0.034308884	0.108199549	-0.131081416	0.710183844	0.805640533	-0.526578785	0.198260707	0.276058709	1.155014997	0.001298352	0.00432535
ENSMUSG00000033257	Ttll4	67534	tubulin tyrosine ligase-like family, member 4 [Source:MGI Symbol;Acc:MGI:1914784]	5.571045046	5.318862973	5.673353165	5.561977661	5.339867524	5.26094178	5.77036477	5.677866683	6.036848231	5.191796129	5.562794147	5.551649047	-0.396597893	0.030154082	0.076820191	-0.146318067	0.426230124	0.521231416	-0.331421463	0.07441433	0.185361999	-0.081141637	0.65589763	0.762743167	-0.477739531	0.037683109	0.069873699	0.06517643	0.652154652	0.728332858
ENSMUSG00000026170	Cyp27a1	104086	cytochrome P450, family 27, subfamily a, polypeptide 1 [Source:MGI Symbol;Acc:MGI:88594]	4.928016933	4.792792567	4.917606098	3.86242769	3.901474413	3.82413795	4.804237872	4.923547029	4.584627421	4.268002258	3.863996218	4.062867211	-0.721288854	0.00035573	0.00264692	-1.012625081	5.69155E-05	0.000397673	0.10756423	0.487823733	0.649496579	-0.183771996	0.276167705	0.4107625	-0.90506085	0.000411482	0.001674862	0.828853085	4.20469E-05	0.00029046
ENSMUSG00000033159	Cnppd1	69171	cyclin Pas1/PHO80 domain containing 1 [Source:MGI Symbol;Acc:MGI:1916421]	6.369739843	6.492080281	6.292139899	5.74117181	6.010338519	6.09435252	6.707241895	6.687763499	6.690987292	6.241951428	6.252596382	6.193334384	-0.459697729	0.000734868	0.00456565	-0.415337034	0.002849131	0.008997267	-0.294728296	0.016717447	0.065382536	-0.250367602	0.042216233	0.097517111	-0.710065331	0.000144711	0.000727589	0.164969433	0.083636092	0.135479546
ENSMUSG00000049339	Retreg2	227298	reticulophagy regulator family member 2 [Source:MGI Symbol;Acc:MGI:2388278]	6.48896292	6.649160836	6.416599705	5.974810805	6.2847861	6.335328971	6.657878051	6.611523613	6.66054401	6.268649937	6.244473292	6.176905474	-0.405657482	0.002735289	0.01226158	-0.298600124	0.025244656	0.052476246	-0.104303168	0.367742934	0.542539663	0.00275419	0.981424289	0.988683555	-0.402903291	0.011446927	0.025906735	0.301354314	0.007410814	0.018020484
ENSMUSG00000026197	Zfand2b	68818	zinc finger, AN1 type domain 2B [Source:MGI Symbol;Acc:MGI:1916068]	3.283243629	3.19342206	3.005415628	3.338679267	2.77412802	3.196981592	2.785577365	2.629835096	2.989534284	2.813905463	3.129115577	2.849309798	0.15353662	0.400025521	0.53444456	-0.093957947	0.647141646	0.720648637	0.357116549	0.079885806	0.194390193	0.109621981	0.594423502	0.711689329	0.263158601	0.267116494	0.352100042	0.203579928	0.222772205	0.304391804
ENSMUSG00000026198	Abcb6	74104	ATP-binding cassette, sub-family B (MDR/TAP), member 6 [Source:MGI Symbol;Acc:MGI:1921354]	3.437749566	3.860260173	3.620345809	3.038054326	3.334635227	3.182890516	3.530220431	3.654466307	3.333112685	3.521515344	3.298269804	3.363266142	-0.118162383	0.459083032	0.588717943	-0.435052712	0.030211813	0.060536927	0.140704209	0.4049334	0.576537539	-0.17618612	0.336263584	0.474733101	-0.294348503	0.164190264	0.236930628	0.258866592	0.087673373	0.140651724
ENSMUSG00000099519	Gm29253		predicted gene 29253 [Source:MGI Symbol;Acc:MGI:5579959]	4.587983653	4.725090517	4.601972727	4.848153351	4.371207054	4.578105604	4.756014018	4.842390396	4.63259204	4.497929476	4.308741484	4.352609493	-0.362394756	0.012060069	0.038250794	-0.088931753	0.52687632	0.615330934	-0.101423936	0.442855767	0.610817347	0.172039067	0.232743958	0.361866712	-0.190355689	0.242875265	0.325709352	0.26097082	0.033805544	0.063351762
ENSMUSG00000033124	Atg9a	245860	autophagy related 9A [Source:MGI Symbol;Acc:MGI:2138446]	5.253898001	5.310893429	5.377811904	6.123286998	5.232544229	5.665522684	5.542512156	5.710157207	5.467739843	4.931233249	5.024668903	5.129438898	-0.55995942	0.003304271	0.014145741	0.269567322	0.135505104	0.207385359	-0.267029578	0.119633963	0.255240621	0.562497164	0.006370217	0.021705123	0.002537744	0.989619044	0.991903879	0.292929842	0.049530456	0.087264057
ENSMUSG00000026199	Ankzf1	52231	ankyrin repeat and zinc finger domain containing 1 [Source:MGI Symbol;Acc:MGI:1098746]	5.064866551	4.731295535	4.535169874	3.279787352	3.489424795	3.532128644	4.896671399	4.789460156	4.884505268	3.710794801	4.041355737	3.576383921	-1.037205751	9.74895E-05	0.001013716	-1.307848567	3.73577E-05	0.000284213	-0.079782293	0.673422997	0.795651629	-0.350425109	0.103724643	0.195780264	-1.38763086	6.61113E-05	0.000394849	0.957423458	7.36596E-05	0.000445679
ENSMUSG00000026200	Glb1l	74577	galactosidase, beta 1-like [Source:MGI Symbol;Acc:MGI:1921827]	4.211133165	3.890956085	3.912922408	4.240890791	3.531785714	3.514879783	3.424336763	3.442677622	3.310300721	3.532563609	3.731701045	3.353154057	0.17908631	0.323229459	0.457711675	-0.320231899	0.131456189	0.202440702	0.610445383	0.006579536	0.033419712	0.111127173	0.583603839	0.703098129	0.290213484	0.217657749	0.297930973	0.431359072	0.017911259	0.037232263
ENSMUSG00000026201	Stk16	20872	serine/threonine kinase 16 [Source:MGI Symbol;Acc:MGI:1313271]	4.360604445	4.166470365	4.336292353	4.113933199	4.010560296	4.15862557	4.422909306	4.404130683	4.54241388	3.929562286	4.252066289	4.233237826	-0.31785859	0.031535655	0.079479919	-0.193167056	0.212377466	0.297804356	-0.177880313	0.218264764	0.383739282	-0.053188778	0.722603866	0.814013372	-0.371047368	0.046115499	0.082859179	0.139978278	0.250339002	0.33484589
ENSMUSG00000026202	Tuba4a	22145	tubulin, alpha 4A [Source:MGI Symbol;Acc:MGI:1095410]	2.54824235	2.381280919	2.645576186	2.702830819	2.50865605	1.999903749	2.078434345	2.029109709	2.16691584	1.627622998	2.045960978	1.761501332	-0.254827602	0.224839741	0.35012596	-0.184293718	0.435069008	0.529941136	0.436734515	0.061161915	0.162863967	0.507268399	0.047635126	0.107044188	0.252440797	0.344194967	0.433308245	0.691562117	0.002646804	0.007742556
ENSMUSG00000026203	Dnajb2	56812	DnaJ heat shock protein family (Hsp40) member B2 [Source:MGI Symbol;Acc:MGI:1928739]	3.723485707	3.717220035	3.858577689	4.578422429	4.096411227	4.213007033	4.067268776	4.080864325	4.175138829	3.88661971	4.176500811	4.16175566	-0.0347072	0.800446608	0.865287081	0.479112334	0.009143898	0.022958074	-0.347336136	0.03191983	0.102741027	0.166483399	0.296709844	0.432881028	0.131776198	0.458727014	0.546163496	-0.312628935	0.024407491	0.048053978
ENSMUSG00000026204	Ptprn	19275	protein tyrosine phosphatase, receptor type, N [Source:MGI Symbol;Acc:MGI:102765]	-0.620470301	-1.157020938	-1.997878609	1.276889627	0.445806301	1.694812559	0.171826195	0.236900266	-0.320877388	2.51936929	2.164979918	1.498381874	2.089606378	0.00072081	0.004508983	2.439334285	0.000699868	0.002895343	-1.296115806	0.019665827	0.07345998	-0.946387899	0.099192212	0.189049006	1.143218479	0.076461198	0.126286882	-3.385722184	4.90642E-06	5.82066E-05
ENSMUSG00000026209	Dnpep	13437	aspartyl aminopeptidase [Source:MGI Symbol;Acc:MGI:1278328]	4.651494091	4.360678646	4.348891556	4.303044051	4.454604325	4.465134411	4.405268286	4.208070293	4.602231624	4.214773474	4.440132428	4.207353139	-0.09510894	0.517842965	0.640889677	-0.020091913	0.902740266	0.927716214	0.045425693	0.768004137	0.862708294	0.12044272	0.469630368	0.604923975	0.02533378	0.891789106	0.919113752	0.140534633	0.292403939	0.380847443
ENSMUSG00000026207	Speg	11790	SPEG complex locus [Source:MGI Symbol;Acc:MGI:109282]	4.855681414	4.840681839	5.135315259	3.608738587	3.821698712	3.762661015	3.684551166	3.714451507	3.779691113	3.523860448	3.524113764	3.827643349	-0.128401537	0.363134237	0.49882931	-1.191938274	8.54957E-06	9.08032E-05	1.211411791	3.74416E-06	0.000159882	0.147875053	0.355772929	0.494190334	0.019473516	0.912534275	0.935301916	1.339813327	2.67981E-07	6.24151E-06
ENSMUSG00000033021	Gmppa	69080	GDP-mannose pyrophosphorylase A [Source:MGI Symbol;Acc:MGI:1916330]	4.972669727	5.046099991	5.006929598	4.559913932	4.558527058	4.598769322	4.886488629	4.765502688	5.074776071	4.570677576	4.628958507	4.622018057	-0.301401421	0.011890989	0.037861475	-0.436868158	0.002558737	0.008253069	0.101252452	0.358562316	0.533413168	-0.034214285	0.767020714	0.847486818	-0.335615706	0.023549089	0.047132106	0.402653873	0.000876126	0.003142562
ENSMUSG00000032997	Chpf	74241	chondroitin polymerizing factor [Source:MGI Symbol;Acc:MGI:106576]	1.358176288	0.679707203	1.163569514	1.611210392	2.321571721	2.292104748	1.0881547	1.12439654	0.905044934	2.567628566	1.479305923	2.154448353	0.968272758	0.014472671	0.043879169	1.071222294	0.01819474	0.040222999	0.049001873	0.892109801	0.939162576	0.151951408	0.701996896	0.798897426	1.120224167	0.025102292	0.049810175	-0.919270886	0.011446688	0.025710167
ENSMUSG00000026213	Stk11ip	71728	serine/threonine kinase 11 interacting protein [Source:MGI Symbol;Acc:MGI:1918978]	6.587070811	6.650098468	6.602407991	5.790479169	5.849580102	5.863771926	6.231161094	6.197836495	6.28458019	5.839791299	5.88097873	5.861934743	-0.375918474	0.000713199	0.004471849	-0.77602061	2.80742E-06	4.02069E-05	0.379684511	0.00097139	0.008188438	-0.020417625	0.822670862	0.886139693	-0.396336099	0.002560906	0.00752774	0.755602985	3.8509E-07	8.14892E-06
ENSMUSG00000006576	Slc4a3	20536	solute carrier family 4 (anion exchanger), member 3 [Source:MGI Symbol;Acc:MGI:109350]	2.275153049	1.384077095	2.044508952	2.057658212	1.146509789	1.659781488	0.19308389	0.173868609	0.232698888	1.942363364	1.422535422	1.861561471	1.502461727	0.000273602	0.002173171	-0.363054024	0.296786299	0.390098899	1.723150058	0.000139538	0.002012853	-0.142365693	0.67609648	0.778767691	1.360096034	0.003695561	0.010182841	0.220688331	0.414242026	0.505636608
ENSMUSG00000026235	Epha4	13838	Eph receptor A4 [Source:MGI Symbol;Acc:MGI:98277]	-6.236414847	-0.791175427	-3.497097676	2.835314158	1.78470602	1.866535498	-2.696786417	-3.330264036	-1.273122813	0.382605408	0.414528783	0.743370542	2.907049836	0.027814576	0.07215688	5.62615682	0.001385005	0.005019694	-1.162722076	0.357288647	0.532502294	1.556384908	0.266545823	0.400568996	4.463434744	0.011929403	0.026850822	-4.069771912	0.00244526	0.007252252
ENSMUSG00000026245	Farsb	23874	phenylalanyl-tRNA synthetase, beta subunit [Source:MGI Symbol;Acc:MGI:1346035]	4.954887257	4.92728618	4.895058208	4.935594099	5.003525038	4.966656098	4.927930869	4.92803066	4.8545752	4.934218649	4.665914356	4.729940152	-0.130050407	0.237073224	0.363432049	0.049902588	0.677294591	0.746436302	0.025485499	0.820571623	0.897024	0.205438494	0.106510435	0.199641348	0.075388087	0.581097196	0.660281551	0.155535906	0.120684293	0.182789599
ENSMUSG00000032883	Acsl3	74205	acyl-CoA synthetase long-chain family member 3 [Source:MGI Symbol;Acc:MGI:1921455]	1.867460979	2.881092117	2.264057323	2.08690772	2.053833515	2.130597731	2.526280518	2.404254171	2.707914662	3.268427946	2.933131711	3.04949581	0.525174665	0.056289753	0.123146023	-0.25270567	0.38768689	0.482766787	-0.201832592	0.453821572	0.620163283	-0.979712927	0.00512568	0.018350197	-0.454538262	0.178662755	0.254015248	-0.727007257	0.007315569	0.017838271
ENSMUSG00000079470	Utp14b	195434	UTP14B small subunit processome component [Source:MGI Symbol;Acc:MGI:2445092]	0.751828032	0.707641152	0.839832572	1.295642293	0.521329529	1.460025051	0.245628453	-0.542721487	1.497277525	1.410302289	1.512948142	1.895390653	1.179980118	0.018989659	0.053958751	0.318111884	0.537084036	0.624156886	0.371585124	0.429830615	0.599278091	-0.49028311	0.348242383	0.486793238	0.689697008	0.241660356	0.324455945	-0.808394994	0.063175758	0.107015929
ENSMUSG00000099377	Gm6159		predicted gene 6159 [Source:MGI Symbol;Acc:MGI:3644323]	1.485211379	1.728986126	1.747386973	2.032955647	1.716612524	1.996907208	1.695471279	1.761349744	1.732442538	1.925807495	1.802712324	2.098461445	0.183791695	0.313464299	0.44739546	0.246305706	0.245062925	0.334224834	-0.081001646	0.668266752	0.792315585	-0.018487634	0.928236659	0.954553532	0.165304061	0.477402244	0.563520433	-0.26479334	0.121174286	0.1834388
ENSMUSG00000072978	Gm5830		predicted pseudogene 5830 [Source:MGI Symbol;Acc:MGI:3647375]	1.745382058	1.563001941	1.649164462	2.103660785	1.977150484	2.22023194	1.443024114	1.562677463	1.287235135	1.607084144	1.471947877	1.601384346	0.116693567	0.508346182	0.632673103	0.450777833	0.043116552	0.080956064	0.222834906	0.242623114	0.410588416	0.556919172	0.016612753	0.046566659	0.673612739	0.011023729	0.025117539	0.106141339	0.50737014	0.596411067
ENSMUSG00000073643	Wdfy1	69368	WD repeat and FYVE domain containing 1 [Source:MGI Symbol;Acc:MGI:1916618]	6.62894619	6.712596586	6.815036933	5.587303374	5.936936346	6.053736707	6.705138357	6.840141528	6.671771665	5.942421155	6.155232767	6.309493241	-0.620194677	0.000665124	0.0042473	-0.817182824	0.000149449	0.000841907	-0.028004689	0.844233056	0.911769075	-0.224992836	0.148971605	0.258598177	-0.845187513	0.000360756	0.001509524	0.592189988	0.000327749	0.001424175
ENSMUSG00000026248	Mrpl44	69163	mitochondrial ribosomal protein L44 [Source:MGI Symbol;Acc:MGI:1916413]	3.720758043	3.45533408	3.549456481	3.331630401	3.151293797	3.151329228	3.631743957	3.611859866	3.587521604	3.212171665	3.048054586	3.034260434	-0.509802539	0.001865697	0.009164875	-0.380649428	0.02174082	0.046400903	-0.035923016	0.790957088	0.877530957	0.093230096	0.52698885	0.65587969	-0.416572443	0.025112052	0.049815715	0.473879523	0.00145508	0.004742836
ENSMUSG00000026249	Serpine2	20720	serine (or cysteine) peptidase inhibitor, clade E, member 2 [Source:MGI Symbol;Acc:MGI:101780]	8.853694715	8.977868334	8.657350439	8.652300263	9.01244146	9.064278887	8.307460366	8.336200972	8.163423232	8.428929889	8.54629117	8.320921472	0.183853885	0.206447425	0.32827797	0.103511656	0.500487988	0.591474192	0.588515844	0.001771814	0.012799815	0.508173616	0.005874937	0.020414914	0.6920275	0.00200014	0.006151416	0.404661959	0.005842398	0.014796666
ENSMUSG00000067106	Gm5529		predicted pseudogene 5529 [Source:MGI Symbol;Acc:MGI:3646377]	2.715994637	2.790143093	2.532944768	2.355906211	2.946659636	3.161557638	2.893750912	2.9368907	2.755905156	3.011220028	2.77243095	2.862981057	0.014255599	0.934747934	0.956928393	0.225861079	0.268831672	0.359754319	-0.180484166	0.336643003	0.511667899	0.031121315	0.875571594	0.921054111	0.045376913	0.839315016	0.879716629	-0.194739765	0.229291641	0.311644603
ENSMUSG00000004364	Cul3	26554	cullin 3 [Source:MGI Symbol;Acc:MGI:1347360]	5.937011139	5.997380252	5.987848444	6.447571981	6.413685664	6.403858506	6.075166052	6.063293496	6.088659193	6.536039365	6.433928968	6.486894544	0.406008099	0.000442892	0.003131126	0.439628067	0.000485082	0.002164715	-0.09771218	0.282611587	0.455615662	-0.064092212	0.492103915	0.62597817	0.341915886	0.007080551	0.017486759	-0.503720279	2.22057E-05	0.00018061
ENSMUSG00000103076	Gm37902		predicted gene, 37902 [Source:MGI Symbol;Acc:MGI:5611130]	0.973297164	0.975968135	1.398291544	1.290750803	1.641914499	1.318898624	0.82163129	1.173085841	0.55783501	1.508875884	1.946836507	2.123473062	0.990915634	0.002687795	0.012123002	0.300991335	0.334501163	0.429234265	0.266007766	0.348714463	0.524449639	-0.423916533	0.183347403	0.302897148	0.566999101	0.116921077	0.179298775	-0.724907868	0.010119985	0.023268261
ENSMUSG00000038608	Dock10	210293	dedicator of cytokinesis 10 [Source:MGI Symbol;Acc:MGI:2146320]	8.441373601	8.506139319	8.569115066	7.603265361	7.702019359	7.663079027	8.633059326	8.617957023	8.713846785	8.66565831	8.721633016	8.783366707	0.061604375	0.540902991	0.660357613	-0.83951943	7.14557E-06	7.94766E-05	-0.151423124	0.167336342	0.321215484	-1.052546929	8.23386E-07	3.01013E-05	-0.990942554	5.91965E-06	5.9721E-05	-0.213027499	0.028603129	0.054905992
ENSMUSG00000026142	Rhbdd1	76867	rhomboid domain containing 1 [Source:MGI Symbol;Acc:MGI:1924117]	5.645234424	5.798008585	5.615229076	5.830002744	5.813869227	5.812077928	5.639613067	5.831044397	5.294785371	6.07174775	5.876074294	5.851095134	0.349034607	0.028505689	0.07356512	0.119065475	0.452588955	0.546965269	0.113989409	0.451385673	0.617974626	-0.115979723	0.464536564	0.600143397	0.233054884	0.210467246	0.289916806	-0.235045198	0.079537219	0.129823881
ENSMUSG00000026150	Mff	75734	mitochondrial fission factor [Source:MGI Symbol;Acc:MGI:1922984]	5.475711112	5.468469934	5.575625003	5.431430977	5.540687849	5.469980038	5.767007351	5.753637681	5.849431949	5.445612766	5.593008708	5.615653414	-0.242325167	0.024149067	0.064893854	-0.013057092	0.901283264	0.926561615	-0.289304932	0.013028535	0.05492941	-0.060036857	0.571500401	0.693351485	-0.302362025	0.025995015	0.051288559	-0.046979765	0.577043724	0.659994354
ENSMUSG00000101450	Gm28941		predicted gene 28941 [Source:MGI Symbol;Acc:MGI:5579647]	-0.275352754	0.651542306	-0.15410976	0.735397607	0.837051682	0.311315917	-0.385102506	-1.799423196	1.337525162	0.719063742	0.778494195	0.245530969	0.924637386	0.170547647	0.2842188	0.549502469	0.468913108	0.561951424	0.345560132	0.613500924	0.749780508	-0.029574785	0.968615879	0.981116427	0.895062601	0.297146587	0.3849691	-0.579077254	0.334884548	0.42435612
ENSMUSG00000026159	Agfg1	15463	ArfGAP with FG repeats 1 [Source:MGI Symbol;Acc:MGI:1333754]	5.926823276	5.96303252	5.851726202	6.298127726	6.229176802	6.346551797	6.207904088	6.210982959	6.19024875	6.161473879	6.210754603	6.141285049	-0.026406511	0.759063203	0.835943886	0.366573943	0.002176812	0.007265804	-0.283362792	0.008388565	0.039922557	0.109617662	0.260221792	0.393401775	0.083211151	0.448938795	0.537272376	-0.256956281	0.004992195	0.013075334
ENSMUSG00000026163	Sphkap	77629	SPHK1 interactor, AKAP domain containing [Source:MGI Symbol;Acc:MGI:1924879]	-2.520786706	-2.024256666	-4.966159697	-2.738594497	-1.045910786	1.229696216	-2.088941371	-3.137646271	-1.389287266	0.784798378	1.30724617	-0.321734261	2.958533741	0.011445383	0.036796866	2.77698859	0.031583635	0.062760079	-0.999891243	0.352321599	0.527931362	-1.181436393	0.318620852	0.456458789	1.777097348	0.186895984	0.263322415	-3.958424983	0.000950656	0.003351576
ENSMUSG00000045658	Pid1	98496	phosphotyrosine interaction domain containing 1 [Source:MGI Symbol;Acc:MGI:2138391]	4.995265435	5.272979344	5.099227824	4.390419338	4.400266472	4.491147347	4.760113175	4.577864583	5.087637686	5.016267637	5.348278061	5.217821703	0.393844175	0.025415728	0.067470915	-0.700970962	0.001740162	0.00606481	0.320907639	0.071333993	0.179654066	-0.773907498	0.000857765	0.004506833	-0.380063323	0.076094514	0.125785933	-0.072936536	0.600452171	0.681827821
ENSMUSG00000026219	Trip12	14897	thyroid hormone receptor interactor 12 [Source:MGI Symbol;Acc:MGI:1309481]	7.59367836	7.753563476	7.785527999	8.387235455	8.285511342	8.293580808	7.778543605	7.873806536	7.715308025	7.884466684	7.849057738	7.951361299	0.095212685	0.365801936	0.501551569	0.589183045	0.000222388	0.001149336	-0.073001189	0.504999184	0.663713214	0.420969171	0.002788177	0.0114721	0.516181856	0.001838094	0.005729145	-0.168213874	0.080685663	0.131343477
ENSMUSG00000104503	Gm37738		predicted gene, 37738 [Source:MGI Symbol;Acc:MGI:5610966]	-1.274470273	-0.767939525	-0.44382476	0.191877488	-0.366015354	-1.156775275	-0.656377275	-0.666607609	-0.568167796	0.774607629	0.018193648	0.517289894	1.016479756	0.032801087	0.081808385	0.244289283	0.622750844	0.699769856	-0.194190218	0.666905563	0.791877504	-0.966380691	0.071261182	0.146728366	0.050099064	0.927677662	0.946418611	-1.210669974	0.008503369	0.02016194
ENSMUSG00000052477	C130026I21Rik	620078	RIKEN cDNA C130026I21 gene [Source:MGI Symbol;Acc:MGI:3612702]	1.453433788	1.35582642	2.042346508	1.923216583	0.898891578	1.74296774	2.029006238	2.20497472	2.386771329	0.003205008	1.314933781	1.640266568	-1.251302277	0.016081888	0.047625151	-0.161049463	0.758225919	0.813694435	-0.595245374	0.227458384	0.393898263	0.495007439	0.353335119	0.491590533	-0.756294837	0.211850512	0.291417696	0.656056902	0.129609272	0.194064669
ENSMUSG00000064281	Rpl19-ps1		ribosomal protein L19, pseudogene 1 [Source:MGI Symbol;Acc:MGI:3642668]	3.944140195	3.706780872	4.024196189	4.149684139	4.31246693	4.127358328	2.923724058	2.936777198	2.95148143	3.042425247	3.074815063	3.196374923	0.157078877	0.243036847	0.370164223	0.315234221	0.051926477	0.094345099	0.949689913	2.07644E-05	0.000515106	1.107845258	1.00396E-05	0.000156532	1.264924135	8.87895E-06	8.12023E-05	0.792611036	2.45744E-05	0.000194081
ENSMUSG00000098842	Gm27907		predicted gene, 27907 [Source:MGI Symbol;Acc:MGI:5531289]	2.807367799	2.861873736	3.048109978	2.961044463	3.16045977	3.140685701	1.827874142	2.047809349	1.626102915	2.06897712	1.94584773	2.25074202	0.225945339	0.203481675	0.324691871	0.200270767	0.316955447	0.410971165	1.069173854	8.2281E-05	0.001373543	1.043499282	0.000199023	0.001472217	1.269444621	0.000102378	0.000554479	0.843228515	0.000160425	0.000816059
ENSMUSG00000072109	A530040E14Rik	621875	RIKEN cDNA A530040E14 gene [Source:MGI Symbol;Acc:MGI:3612703]	0.932950444	-0.368105906	0.825576364	0.454459636	-0.431510616	0.64835571	-1.252315778	-1.066560785	-1.173702347	-0.794847938	-0.493239502	0.196666792	0.740322149	0.142447623	0.249533574	-0.287838554	0.6067389	0.68510256	1.65323668	0.006524678	0.033213935	0.625075978	0.275632474	0.410325509	1.365398126	0.04596723	0.082663941	0.912914532	0.055394483	0.095868961
ENSMUSG00000079455	Gm16026		predicted pseudogene 16026 [Source:MGI Symbol;Acc:MGI:3783243]	0.526352229	0.481298288	0.782182494	1.005846377	0.61154726	0.478120454	-0.281815127	-0.046211844	-0.544122059	0.269869825	-0.084533816	0.220293707	0.393535173	0.200087075	0.320239453	0.034235143	0.920533694	0.940159835	0.892549477	0.013636708	0.056532721	0.533249447	0.14127693	0.247961985	0.926784619	0.030846635	0.0592044	0.499014304	0.084220683	0.136267613
ENSMUSG00000101751	Gm2427		predicted gene 2427 [Source:MGI Symbol;Acc:MGI:3780593]	0.457822547	0.174707129	0.816700577	1.36003315	0.93836289	1.175512347	-0.152217992	-0.349073243	0.288321592	-0.014465925	-0.435410595	0.292746017	-0.046074387	0.894206058	0.929813664	0.625593312	0.140015068	0.213149746	0.571581903	0.137610624	0.281341473	1.243249601	0.009226498	0.029203581	1.197175214	0.019710163	0.04064325	0.61765629	0.070392506	0.117112898
ENSMUSG00000070034	Sp110	109032	Sp110 nuclear body protein [Source:MGI Symbol;Acc:MGI:1923364]	5.565646368	5.478574373	5.743039755	6.172050418	5.786031513	5.727887349	5.043592788	5.130264935	5.034132042	5.035957899	5.151965481	5.225427558	0.058525153	0.630396572	0.7357363	0.258729614	0.075285258	0.128280011	0.513107362	0.001724593	0.012556628	0.713311822	0.000212868	0.001553027	0.771836976	0.00032504	0.001382565	0.454582208	0.001159992	0.003937114
ENSMUSG00000070031	Sp140	434484	Sp140 nuclear body protein [Source:MGI Symbol;Acc:MGI:3702467]	4.364919741	4.147354594	4.331942108	5.063893821	4.314598535	4.685198387	3.879542542	3.744489388	4.1928483	3.611525688	3.949075739	3.916729686	-0.11284079	0.53580195	0.656265269	0.343593433	0.113536393	0.179620495	0.33213982	0.102244531	0.229463816	0.788574043	0.00230667	0.009920823	0.675733253	0.012301934	0.027559823	0.44498061	0.016742574	0.035277998
ENSMUSG00000026222	Sp100	20684	nuclear antigen Sp100 [Source:MGI Symbol;Acc:MGI:109561]	6.408537906	6.218481726	6.270945889	6.954537336	6.769812764	6.441693183	2.957295598	2.767830933	3.078863591	3.623216494	3.466281409	3.298009561	0.545074577	0.002623853	0.011896399	0.39089307	0.031459521	0.06254983	3.366959642	1.4219E-10	1.31687E-07	3.212778135	4.76289E-10	4.39022E-07	3.757852712	3.38879E-10	6.44891E-08	2.821885065	1.53894E-10	3.05414E-08
ENSMUSG00000052760	A630001G21Rik	319997	RIKEN cDNA A630001G21 gene [Source:MGI Symbol;Acc:MGI:2443131]	5.565932573	5.355720616	5.819623272	6.655006094	6.174633719	6.158293274	5.510333369	5.384489841	5.878118354	5.701637706	5.838352751	6.044570022	0.247424597	0.193935934	0.312910337	0.710863325	0.004188316	0.012124211	-0.041977323	0.82783429	0.901458287	0.421461405	0.056487155	0.122440249	0.668886002	0.013088207	0.028924812	-0.28940192	0.092671936	0.146862712
ENSMUSG00000036707	Cab39	12283	calcium binding protein 39 [Source:MGI Symbol;Acc:MGI:107438]	6.795550648	6.828067726	6.769557014	6.687402284	6.901795673	6.891954795	7.250823271	7.276817672	7.197020605	6.997199865	7.028176978	7.002303153	-0.229377244	0.023788501	0.064256604	0.0510794	0.602125471	0.681222171	-0.438368715	0.000581728	0.005655999	-0.157912071	0.126412849	0.227625055	-0.387289315	0.004787142	0.012604809	-0.208991471	0.018896895	0.038948912
ENSMUSG00000026223	Itm2c		integral membrane protein 2C [Source:MGI Symbol;Acc:MGI:1927594]	9.43981225	9.508836656	9.321392469	9.481715203	9.726717892	9.747268899	9.348408619	9.39293308	9.2051277	9.400617553	9.36608362	9.279382347	0.043245721	0.715125946	0.803634496	0.247082499	0.07473186	0.127571271	0.124779847	0.325271077	0.500516814	0.328616626	0.024365157	0.063221542	0.371862347	0.026380761	0.051909565	0.081534126	0.433220291	0.524938316
ENSMUSG00000099342	Gm18180		predicted gene, 18180 [Source:MGI Symbol;Acc:MGI:5010365]	1.690758215	2.039455781	2.021165667	2.036821662	2.006502996	1.603023662	1.871178771	1.929620574	1.85517971	1.770347299	1.984832412	1.88292224	0.001035968	0.995506376	0.997280112	-0.070135926	0.741215056	0.799825972	0.029352113	0.880108722	0.932815452	-0.041819781	0.843687059	0.899432171	-0.040783813	0.86374143	0.898337647	0.028316145	0.86507956	0.902431873
ENSMUSG00000026229	Psmd1	70247	proteasome (prosome, macropain) 26S subunit, non-ATPase, 1 [Source:MGI Symbol;Acc:MGI:1917497]	6.182919585	6.11906876	6.09264241	6.30553918	6.427711644	6.305535286	6.129793777	6.131623723	6.072408226	6.074969734	6.148089292	6.023910909	-0.017408585	0.844995971	0.897796101	0.229840214	0.034647783	0.067637597	0.020863164	0.823914376	0.898832573	0.268111963	0.017092432	0.047673267	0.250703378	0.043132667	0.078275507	0.038271749	0.624585364	0.704223673
ENSMUSG00000026228	Htr2b	15559	5-hydroxytryptamine (serotonin) receptor 2B [Source:MGI Symbol;Acc:MGI:109323]	-0.011745685	0.588498037	0.430577231	-0.882116336	0.14931764	1.16453385	-5.428170854	-5.261901404	-5.323916104	-5.329645791	-5.455239993	-4.527102115	0.151316877	0.840050925	0.894526096	-0.002256315	0.997901792	0.998189206	5.664893932	1.43158E-05	0.000398547	5.51132074	4.21569E-05	0.000456282	5.662637617	8.9697E-05	0.00050069	5.513577055	4.25035E-06	5.20687E-05
ENSMUSG00000094638	Gm21972		predicted gene 21972 [Source:MGI Symbol;Acc:MGI:5439441]	2.590681022	2.869965953	2.707764859	2.677597728	2.551531608	2.815995577	2.527442097	2.449162712	2.737793692	2.398604239	2.673248535	2.651845968	0.003730047	0.981701684	0.988891291	-0.040653283	0.826759095	0.868062683	0.148993119	0.393677694	0.566699513	0.10460979	0.576163575	0.697096706	0.108339837	0.606402896	0.682780761	0.145263073	0.331622517	0.421221542
ENSMUSG00000062590	Armc9	78795	armadillo repeat containing 9 [Source:MGI Symbol;Acc:MGI:1926045]	3.024347932	3.028762201	2.967670062	2.372816148	2.609759982	2.421341676	2.724852982	2.461300992	3.069134964	2.694143238	3.075815118	2.804297351	0.132039918	0.482218221	0.609274718	-0.522645855	0.028142596	0.057261607	0.256868828	0.207147396	0.370406954	-0.397816944	0.081022792	0.161394986	-0.265777027	0.278467149	0.364536905	0.12482891	0.460331473	0.551334151
ENSMUSG00000079445	B3gnt7	227327	UDP-GlcNAc:betaGal beta-1,3-N-acetylglucosaminyltransferase 7 [Source:MGI Symbol;Acc:MGI:2384394]	4.205059084	4.425572204	4.309612822	6.201808777	6.0282107	6.148834405	2.196303609	2.437153366	1.866032181	6.035341597	5.743934419	5.895129798	3.71093377	6.62784E-11	2.30185E-08	1.791125777	4.87282E-07	1.12305E-05	2.15312665	3.84451E-08	5.44979E-06	0.233318658	0.201919893	0.32491698	3.944252428	4.74492E-10	7.84719E-08	-1.557807119	1.87955E-07	4.82036E-06
ENSMUSG00000026234	Ncl	17975	nucleolin [Source:MGI Symbol;Acc:MGI:97286]	6.97728264	7.034339375	7.033815406	8.283490432	7.981513767	7.956653406	6.903564767	6.824664668	7.020031586	7.731713716	7.696301416	7.676062513	0.785581035	8.19183E-06	0.00015337	1.017764286	1.4846E-06	2.58161E-05	0.102311957	0.353194756	0.528735225	0.334495208	0.010976509	0.033557584	1.120076243	2.42003E-06	3.02602E-05	-0.683269078	7.96438E-06	8.41856E-05
ENSMUSG00000026238	Ptma		prothymosin alpha [Source:MGI Symbol;Acc:MGI:97803]	7.280218243	7.080329442	7.156832634	7.537795565	7.473202808	7.414563669	6.889744	6.904881534	6.827979667	7.132003096	7.149648357	7.090556221	0.256114578	0.019487082	0.055036207	0.310285444	0.011105589	0.026967111	0.284830903	0.014589804	0.059561069	0.339001769	0.006866385	0.023018297	0.595116347	0.000369765	0.001541649	0.028716325	0.730677321	0.794565115
ENSMUSG00000026239	Pde6d	18582	phosphodiesterase 6D, cGMP-specific, rod, delta [Source:MGI Symbol;Acc:MGI:1270843]	3.234068504	3.135620716	3.409452321	3.386879621	3.287602359	3.242771115	3.579136998	3.711101719	3.491607137	2.865364511	2.859829291	3.049787493	-0.68713355	0.000326661	0.002480141	0.031291666	0.840873405	0.878830375	-0.339021831	0.035198166	0.110253194	0.379403384	0.030093661	0.074680446	-0.307730165	0.100613332	0.158399865	0.348111719	0.014512965	0.031262849
ENSMUSG00000026240	Cops7b	26895	COP9 signalosome subunit 7B [Source:MGI Symbol;Acc:MGI:1349388]	4.116196749	3.768273578	3.537979384	3.752485186	3.597835315	3.451399651	4.159843544	3.925041015	4.203352984	3.732745033	3.707384935	3.190308629	-0.503113118	0.029393213	0.075337734	-0.225115024	0.344932722	0.439574844	-0.282183374	0.210387883	0.374514156	-0.004185281	0.985709747	0.991993611	-0.507298398	0.074694228	0.12388398	0.220929744	0.245631233	0.329437062
ENSMUSG00000053333	Dis3l2	208718	DIS3 like 3'-5' exoribonuclease 2 [Source:MGI Symbol;Acc:MGI:2442555]	4.463204818	4.577775449	4.875769912	4.111603054	4.331835617	4.455828176	4.445323368	4.394251288	4.750410747	4.343379012	4.418350655	4.848081989	-0.033040413	0.856102789	0.905056434	-0.309994553	0.150474996	0.225720618	0.099615763	0.606345358	0.744375196	-0.177338376	0.395953455	0.53435857	-0.21037879	0.374593903	0.464257159	0.132656177	0.42102026	0.512828886
ENSMUSG00000084106	Gm6136		predicted pseudogene 6136 [Source:MGI Symbol;Acc:MGI:3646897]	5.438333898	5.233748128	5.366860362	5.695845443	5.580916201	5.584376049	4.442538059	4.473373859	4.351213227	4.920983322	4.615462229	4.757898346	0.332409506	0.015724715	0.046770701	0.268392513	0.064387312	0.113023571	0.918847632	1.24311E-05	0.000359028	0.854830639	4.19686E-05	0.00045549	1.187240145	6.57644E-06	6.52105E-05	0.586438125	0.000145178	0.000758198
ENSMUSG00000103984	Gm37447		predicted gene, 37447 [Source:MGI Symbol;Acc:MGI:5610675]	1.245678446	2.000819981	1.997968615	0.928450001	1.009969486	0.286393382	0.973220678	0.442662473	1.875815437	0.740895771	1.309037874	1.211041645	0.002786949	0.994286229	0.996494594	-1.056609572	0.035637132	0.06918265	0.643575308	0.137676399	0.281341473	-0.415821214	0.367006928	0.505182829	-0.413034265	0.420081816	0.508786101	0.640788359	0.091158052	0.144959669
ENSMUSG00000026254	Eif4e2	26987	eukaryotic translation initiation factor 4E member 2 [Source:MGI Symbol;Acc:MGI:1914440]	6.353404434	6.156934604	6.350952704	6.116210588	6.050001329	6.154473011	6.430846151	6.382579598	6.575824256	6.259531755	6.337877824	6.440951702	-0.127392752	0.252568526	0.380964383	-0.168993938	0.171192597	0.250390351	-0.198369955	0.101487222	0.228502511	-0.23997114	0.062284539	0.132039802	-0.367363892	0.018445299	0.038434393	-0.070977202	0.456940127	0.548163127
ENSMUSG00000048000	Gigyf2	227331	GRB10 interacting GYF protein 2 [Source:MGI Symbol;Acc:MGI:2138584]	5.623023488	5.484252915	5.541328058	5.693748996	5.504788963	5.703569864	5.777249965	5.710638996	5.872441467	5.700338229	5.55207768	5.668467179	-0.155314453	0.144935606	0.252723162	0.075385173	0.505996218	0.596410951	-0.244719532	0.03884873	0.118508248	-0.014019906	0.900641303	0.937518622	-0.169334359	0.204086435	0.282446496	-0.089405079	0.327105547	0.416550579
ENSMUSG00000026288	Inpp5d	16331	inositol polyphosphate-5-phosphatase D [Source:MGI Symbol;Acc:MGI:107357]	9.971990552	10.03644213	9.953259628	9.422811793	9.71494518	9.625871569	10.39726074	10.35219741	10.41421062	10.45925957	10.44726042	10.40609135	0.054809455	0.619269195	0.726656614	-0.372026365	0.008585796	0.021737539	-0.390452255	0.00524737	0.028259913	-0.817288076	2.32108E-05	0.000289968	-0.76247862	0.000146916	0.000736806	-0.44526171	0.000568918	0.002234495
ENSMUSG00000026289	Atg16l1	77040	autophagy related 16-like 1 (S. cerevisiae) [Source:MGI Symbol;Acc:MGI:1924290]	5.456557729	5.405457195	5.568204887	5.813052609	5.605918296	5.657068732	5.43928333	5.440468564	5.529805093	5.535434241	5.616713375	5.705328328	0.139155368	0.176200556	0.290951875	0.197159807	0.092147132	0.151241488	-0.003339101	0.974354131	0.986393831	0.054665338	0.619310075	0.733707621	0.193820706	0.140754782	0.209376318	-0.142494469	0.121440535	0.18375208
ENSMUSG00000070738	Dgkd	227333	diacylglycerol kinase, delta [Source:MGI Symbol;Acc:MGI:2138334]	7.993421379	7.941327554	7.901712186	6.179572288	6.316931339	6.197555572	8.239142165	8.22718459	8.202483321	6.91566836	7.019302492	6.879033609	-1.272484406	3.00019E-08	2.08393E-06	-1.696578784	3.4434E-09	3.92096E-07	-0.275960005	0.01646649	0.064729053	-0.700054383	2.55727E-05	0.000313553	-1.972538788	3.2645E-09	2.60635E-07	0.996524401	8.63182E-08	2.6735E-06
ENSMUSG00000103591	Gm38365		predicted gene, 38365 [Source:MGI Symbol;Acc:MGI:5611593]	0.352932799	-0.825119582	0.054581126	-0.428465783	-1.564451679	-2.046023842	0.411538479	0.047676949	0.836018531	0.05453697	0.44834201	0.02358577	-0.213073521	0.639695618	0.743695727	-1.413351628	0.018791551	0.041162444	-0.53362318	0.277136644	0.448820501	-1.733901286	0.006285571	0.021470163	-1.946974807	0.005991442	0.01521073	-0.320549658	0.442821092	0.534695402
ENSMUSG00000005501	Usp40	227334	ubiquitin specific peptidase 40 [Source:MGI Symbol;Acc:MGI:2443184]	4.805776725	4.678275126	4.876589773	4.535754909	4.277897604	4.285106411	4.514210941	4.465255017	4.651215877	4.44397886	4.5510432	4.59579995	-0.018504032	0.868540511	0.913311996	-0.446727368	0.003954981	0.011607302	0.2359347	0.065292867	0.170093404	-0.192288637	0.14675826	0.255452418	-0.210792668	0.158909649	0.230700475	0.254438732	0.02413662	0.047581371
ENSMUSG00000090165	Ugt1a10		UDP glycosyltransferase 1 family, polypeptide A10 [Source:MGI Symbol;Acc:MGI:3580642]	3.110564534	3.214617888	3.082149705	2.871068035	3.026314935	3.017935576	3.250255751	3.31588611	3.114964418	3.2944433	3.161677302	3.16448086	-0.020209534	0.871143737	0.915081841	-0.147140026	0.31066291	0.404397409	-0.088621259	0.504508167	0.663256123	-0.215551751	0.148305281	0.257693179	-0.235761285	0.159310706	0.231210231	-0.068411724	0.54404533	0.629770663
ENSMUSG00000090175	Ugt1a9		UDP glucuronosyltransferase 1 family, polypeptide A9 [Source:MGI Symbol;Acc:MGI:3576092]	3.07510884	3.245098304	3.079372046	2.859600825	2.99888373	3.000892786	3.285431023	3.369448416	3.131122528	3.293921088	3.143403032	3.158600317	-0.064862285	0.619762253	0.726989549	-0.165358945	0.276790848	0.368453283	-0.125645979	0.3687654	0.54319679	-0.226142639	0.146416098	0.254984635	-0.291004924	0.101785975	0.159901703	-0.060783694	0.604673535	0.686060499
ENSMUSG00000089675	Ugt1a8		UDP glucuronosyltransferase 1 family, polypeptide A8 [Source:MGI Symbol;Acc:MGI:3576090]	3.104300003	3.288043005	3.152997142	2.989952532	3.0824288	3.132585987	3.347812533	3.431806785	3.225974062	3.353969235	3.228901415	3.287194762	-0.050844783	0.683562128	0.779898578	-0.101904257	0.476042919	0.568338624	-0.151217585	0.262912708	0.433208794	-0.202277059	0.171595467	0.288247186	-0.253121843	0.132556448	0.199193537	-0.100372802	0.376914938	0.467634395
ENSMUSG00000090124	Ugt1a7c	394432	UDP glucuronosyltransferase 1 family, polypeptide A7C [Source:MGI Symbol;Acc:MGI:3032636]	5.667970149	5.719078936	5.687086222	5.448180256	5.479848197	5.617148875	5.882992481	5.901435655	5.85100222	5.977969152	5.72399933	5.898447302	-0.024449822	0.813646777	0.874588442	-0.171965966	0.15247183	0.228173937	-0.183559698	0.113416746	0.245993041	-0.331075842	0.013056723	0.038412535	-0.355525664	0.018091864	0.037784568	-0.159109876	0.101318201	0.157863666
ENSMUSG00000090145	Ugt1a6b		UDP glucuronosyltransferase 1 family, polypeptide A6B [Source:MGI Symbol;Acc:MGI:3580629]	3.115197019	3.200139363	3.139814832	2.877768575	3.001953864	2.971720318	3.245351528	3.329017006	3.103853156	3.272210072	3.094444486	3.164221673	-0.055273069	0.661364397	0.76189354	-0.189565707	0.201951307	0.286013616	-0.072483102	0.587114873	0.728687556	-0.206775741	0.167404959	0.28288404	-0.26204881	0.1244721	0.189207398	-0.017210034	0.878776395	0.912622317
ENSMUSG00000054545	Ugt1a6a	94284	UDP glucuronosyltransferase 1 family, polypeptide A6A [Source:MGI Symbol;Acc:MGI:2137698]	3.35312844	3.332508181	3.447615453	3.047905325	3.123556107	2.944022643	3.449188184	3.419350338	3.497781085	3.294948294	3.247519596	3.302669324	-0.178291426	0.136629724	0.242130389	-0.341660356	0.020379921	0.043989723	-0.077450428	0.522062824	0.677170565	-0.240819358	0.083179063	0.164768793	-0.419110784	0.013373376	0.029428631	0.100840998	0.333114707	0.422575976
ENSMUSG00000089943	Ugt1a5		UDP glucuronosyltransferase 1 family, polypeptide A5 [Source:MGI Symbol;Acc:MGI:3032634]	3.053092344	3.207359306	3.064561905	2.870510046	2.986805112	2.957129959	3.276825153	3.33589553	3.164931994	3.208608107	3.128885285	3.109103395	-0.10884578	0.380698348	0.515966971	-0.159960254	0.263025207	0.353516465	-0.148135639	0.263736986	0.434206473	-0.199250113	0.170278632	0.286485498	-0.308095893	0.069066755	0.116088973	-0.03928986	0.720474565	0.786796058
ENSMUSG00000090171	Ugt1a2		UDP glucuronosyltransferase 1 family, polypeptide A2 [Source:MGI Symbol;Acc:MGI:3576049]	3.059594387	3.169538064	3.07426565	2.87727014	2.991336182	2.950946631	3.22906454	3.297028999	3.102689999	3.231216597	3.089086525	3.114784365	-0.066891888	0.590196554	0.702571596	-0.151557909	0.292926973	0.385865874	-0.106074812	0.422274818	0.592190771	-0.190740834	0.192539047	0.314284334	-0.257632722	0.124136645	0.188800174	-0.039182925	0.724309109	0.789851396
ENSMUSG00000089960	Ugt1a1	394436	UDP glucuronosyltransferase 1 family, polypeptide A1 [Source:MGI Symbol;Acc:MGI:98898]	3.0542411	3.164723326	3.098509846	2.871811969	3.00482643	2.961505568	3.228361771	3.303967338	3.108863574	3.215943247	3.094347837	3.143586905	-0.066978448	0.584944166	0.697933896	-0.148265001	0.297043597	0.390326301	-0.106137023	0.416158417	0.586764082	-0.187423576	0.1944163	0.316356632	-0.254402024	0.124014909	0.188656934	-0.039158575	0.721043031	0.787169334
ENSMUSG00000044783	Hjurp	212427	Holliday junction recognition protein [Source:MGI Symbol;Acc:MGI:2685821]	6.606295408	6.558004581	6.458943191	5.664344736	5.52330125	5.68266425	6.558313145	6.51186242	6.599637319	5.943367195	6.014026592	5.916715124	-0.590705417	4.24509E-05	0.000532245	-0.931733537	1.37018E-06	2.43919E-05	-0.014004316	0.885682329	0.93622728	-0.355032436	0.004349503	0.016191723	-0.945737853	4.6422E-06	4.9531E-05	0.576701101	1.54582E-05	0.000136955
ENSMUSG00000062310	Glrp1	14659	glutamine repeat protein 1 [Source:MGI Symbol;Acc:MGI:108038]	3.746223573	3.53170034	3.823203583	2.669753301	2.477572603	2.455519314	3.104214643	2.763082503	3.618787007	3.469053185	3.405447342	3.5697287	0.306909009	0.14136409	0.248173763	-1.187872457	0.00021758	0.001130234	0.53575124	0.023741672	0.084030398	-0.959030225	0.001153914	0.005712823	-0.652121217	0.02359415	0.047208689	0.228842232	0.214491046	0.29525948
ENSMUSG00000049866	Arl4c	320982	ADP-ribosylation factor-like 4C [Source:MGI Symbol;Acc:MGI:2445172]	8.29552448	8.432792084	8.217794667	7.026928734	7.340683619	7.198236179	8.250171805	8.270248475	8.142850118	7.575184896	7.751448965	7.509217868	-0.58847318	0.000522366	0.003529976	-1.107561686	4.12206E-06	5.3071E-05	0.117543727	0.376965883	0.550663518	-0.401544778	0.011404012	0.034613181	-0.990017959	4.53528E-05	0.000291551	0.706016907	3.39347E-05	0.000246044
ENSMUSG00000036206	Sh3bp4	98402	SH3-domain binding protein 4 [Source:MGI Symbol;Acc:MGI:2138297]	2.728993001	3.226128724	3.143413899	5.41452755	4.506125853	5.053552774	1.802805841	2.23728621	1.491705853	2.125399433	2.478367353	2.619947962	0.542920325	0.054381882	0.120259967	1.88044804	4.19067E-05	0.000312154	1.179870022	0.001009034	0.008439197	2.517397738	2.77763E-06	6.90284E-05	3.060318062	1.30451E-06	1.97195E-05	0.636949697	0.016991096	0.035725791
ENSMUSG00000055013	Agap1	347722	ArfGAP with GTPase domain, ankyrin repeat and PH domain 1 [Source:MGI Symbol;Acc:MGI:2653690]	4.255781208	4.538274454	4.506900089	4.542410076	4.466688006	4.496732584	4.686415832	4.801342448	4.623147917	4.54147406	4.574483875	4.679164127	-0.117168038	0.316917234	0.451226219	0.052964828	0.682202435	0.750784776	-0.267452831	0.044463127	0.130615723	-0.097319966	0.456423168	0.592748494	-0.214488004	0.161114846	0.233201538	-0.150284793	0.159737581	0.231467037
ENSMUSG00000044337	Ackr3	12778	atypical chemokine receptor 3 [Source:MGI Symbol;Acc:MGI:109562]	0.499942345	1.307561474	0.92248904	-0.714862603	-2.643679696	-1.508792733	-3.478099067	-1.16892895	-6.290799876	-0.439595172	-0.611517298	-0.269034397	3.145337299	0.008330417	0.028845091	-2.650260043	0.039359789	0.075107994	4.511478456	0.001129564	0.009134223	-1.284118885	0.282734772	0.418068276	1.861218414	0.170295106	0.243980242	1.366141157	0.153089588	0.223441958
ENSMUSG00000034432	Cops8	108679	COP9 signalosome subunit 8 [Source:MGI Symbol;Acc:MGI:1915363]	5.392751065	5.393264974	5.303270913	5.648987782	5.675223273	5.549955666	5.550258527	5.460600054	5.624768387	5.497213904	5.677515559	5.455785049	0.016947984	0.871016238	0.915081841	0.259240469	0.042856182	0.080591805	-0.177724051	0.126717154	0.265405563	0.064568435	0.58023952	0.700320366	0.081516418	0.541484151	0.624049927	-0.194672034	0.053346472	0.092942382
ENSMUSG00000048126	Col6a3	12835	collagen, type VI, alpha 3 [Source:MGI Symbol;Acc:MGI:88461]	5.949440436	6.080351852	6.477592906	5.79166087	5.080723272	5.431164916	5.483641764	5.601810817	5.657652196	5.716493872	5.680811095	6.190220427	0.229359098	0.274297302	0.404773542	-0.808458921	0.003629332	0.010849727	0.564870091	0.021057353	0.077265914	-0.472947928	0.054621329	0.11929236	-0.24358883	0.354519899	0.444052875	0.335510994	0.08132069	0.132222264
ENSMUSG00000026303	Mlph	171531	melanophilin [Source:MGI Symbol;Acc:MGI:2176380]	6.340724471	6.336380544	6.463412773	7.099132055	7.391829726	7.380874571	7.09877683	7.085370166	7.171660728	8.185881887	8.082931018	8.291287412	1.051561158	8.61234E-07	2.93242E-05	0.951268664	5.13526E-06	6.23592E-05	-0.747141131	3.53511E-05	0.000752064	-0.847433625	1.57682E-05	0.000217683	0.204127533	0.156025398	0.227392449	-1.798702289	7.35326E-10	8.65052E-08
ENSMUSG00000026305	Lrrfip1	16978	leucine rich repeat (in FLII) interacting protein 1 [Source:MGI Symbol;Acc:MGI:1342770]	6.194205887	6.10152201	6.427207098	7.709003483	7.598313741	7.441486132	6.132547186	6.071980331	6.341744286	6.768875058	6.844016269	6.992747337	0.670289006	0.000289009	0.00226831	1.343322238	1.13685E-06	2.10423E-05	0.033896981	0.806592938	0.887961732	0.706930213	0.000385358	0.002444474	1.377219219	3.61145E-06	4.10895E-05	-0.636392026	0.00014106	0.000743681
ENSMUSG00000034353	Ramp1	51801	receptor (calcitonin) activity modifying protein 1 [Source:MGI Symbol;Acc:MGI:1858418]	4.95144025	5.035455803	4.460115823	3.951891696	4.243157152	4.439363167	4.42975383	4.35858143	4.403218709	3.481997818	4.149504584	3.466524869	-0.637856553	0.021387584	0.059092346	-0.561372152	0.060752614	0.107732361	0.426777352	0.117286626	0.251986669	0.503261753	0.088174258	0.172111395	-0.1345948	0.666781697	0.735737199	1.064633905	0.000396736	0.001664086
ENSMUSG00000034343	Ube2f	67921	ubiquitin-conjugating enzyme E2F (putative) [Source:MGI Symbol;Acc:MGI:1915171]	5.758085193	5.535125453	5.845214193	7.200945071	6.960171929	7.023486044	5.699672128	5.714154332	5.774974733	6.337501735	6.267400051	6.487116008	0.614614637	0.000280775	0.002212433	1.34195327	4.9617E-07	1.13206E-05	-0.043639691	0.730857007	0.837919084	0.683698942	0.000254631	0.001781138	1.298313579	2.73879E-06	3.32001E-05	-0.658254328	5.03592E-05	0.000333615
ENSMUSG00000083064	Gm7785		predicted gene 7785 [Source:MGI Symbol;Acc:MGI:3645449]	-0.130246901	0.023122961	-0.929245422	0.952616031	-0.026036584	1.233426356	-0.201564837	-0.187036686	-0.321221858	0.576295103	1.247510872	0.453965945	1.068332125	0.02439122	0.065401047	1.09646178	0.041772004	0.078994919	-0.135617285	0.759454292	0.856802582	-0.107487629	0.826004423	0.888009089	0.960844495	0.097994565	0.154979564	-1.20394941	0.008066547	0.019300803
ENSMUSG00000026307	Scly	50880	selenocysteine lyase [Source:MGI Symbol;Acc:MGI:1355310]	4.092130747	3.754912401	3.788553563	3.592315411	3.665744546	3.729161797	3.554347468	3.622158037	3.366731442	3.550377171	3.480532409	3.401034602	-0.028297807	0.835610906	0.891780495	-0.197257518	0.218636206	0.3049186	0.361896095	0.025786756	0.088890725	0.192936384	0.228859127	0.357185822	0.164638577	0.355588708	0.444901154	0.390193902	0.007483983	0.018157088
ENSMUSG00000026309	Ilkap	67444	integrin-linked kinase-associated serine/threonine phosphatase 2C [Source:MGI Symbol;Acc:MGI:1914694]	4.764906517	4.52397642	4.573126618	4.507597912	3.978868476	4.202758511	4.596757897	4.617296634	4.601878699	4.17260957	4.544970745	4.317549121	-0.242690004	0.122223205	0.222474418	-0.435120188	0.022145876	0.047127835	0.00705541	0.964035983	0.980839892	-0.185374773	0.281415888	0.416561483	-0.428064777	0.041231094	0.07543558	0.249745414	0.079668444	0.129992251
ENSMUSG00000067071	Hes6	55927	hairy and enhancer of split 6 [Source:MGI Symbol;Acc:MGI:1859852]	3.346152333	3.707089949	3.276534306	1.936394687	2.151084697	1.575907343	3.527199855	3.513274953	3.296504261	2.752785564	2.394051337	2.068967723	-1.010782779	0.000759743	0.004684577	-1.568165745	6.09671E-05	0.00041887	0.011046293	0.962829548	0.980114903	-0.546336674	0.051686453	0.114244742	-1.557119452	0.000179835	0.000860284	1.021829072	0.000304323	0.001342537
ENSMUSG00000055866	Per2	18627	period circadian clock 2 [Source:MGI Symbol;Acc:MGI:1195265]	3.229738782	2.54936567	2.167022667	3.988798207	3.186120607	3.563181151	3.855930093	3.553493806	3.906976514	4.28874605	4.345599877	3.582143819	0.371805818	0.252977003	0.38137347	0.87471288	0.029565528	0.05948216	-1.119997143	0.005479977	0.029100858	-0.617090081	0.106125794	0.199103257	-0.245284263	0.547409231	0.629676993	-1.491802961	0.000217625	0.00104142
ENSMUSG00000034292	Traf3ip1	74019	TRAF3 interacting protein 1 [Source:MGI Symbol;Acc:MGI:1921269]	3.129174211	2.685967957	2.791288852	2.979119602	2.811231804	2.693192817	3.397463883	3.136445063	3.719803344	2.154229532	2.889914316	2.343123953	-0.905353336	0.003926158	0.016175026	-0.062383857	0.830106681	0.870656249	-0.551696286	0.059778622	0.160596523	0.291273193	0.327529008	0.46600092	-0.614080143	0.081222245	0.132808313	0.35365705	0.142578144	0.210398936
ENSMUSG00000026311	Asb1	65247	ankyrin repeat and SOCS box-containing 1 [Source:MGI Symbol;Acc:MGI:1929735]	4.321266669	4.601562512	4.4468202	4.355866025	4.760662984	4.613381421	4.888265762	5.093563901	4.615029192	5.258776697	5.363624846	5.308382239	0.448341659	0.008261784	0.028700352	0.151461184	0.354384353	0.44917661	-0.400565038	0.019889608	0.074026467	-0.697445513	0.000983373	0.005016899	-0.249103854	0.18905103	0.265831404	-0.848906697	2.7992E-05	0.000214323
ENSMUSG00000026313	Hdac4	208727	histone deacetylase 4 [Source:MGI Symbol;Acc:MGI:3036234]	4.664512822	4.687224273	4.917159725	5.849479658	5.666396273	5.493381824	5.199372016	5.015180437	5.574714024	5.149173586	5.369058877	5.400603581	0.037042777	0.815726392	0.875683455	0.885999684	0.000341233	0.001621762	-0.514435455	0.009387467	0.043455746	0.334521452	0.080216402	0.160225198	0.37156423	0.086649515	0.140051067	-0.551478232	0.002057089	0.006309799
ENSMUSG00000026260	Ndufa10		NADH:ubiquinone oxidoreductase subunit A10 [Source:MGI Symbol;Acc:MGI:1914523]	5.024530766	4.927868062	4.953016182	4.892185297	5.205181234	5.015010283	4.949859229	4.955454031	4.847463358	5.002719754	4.757869428	4.803845435	-0.06328557	0.577416943	0.691536534	0.100751887	0.432231364	0.527455913	0.052734558	0.659003294	0.785826073	0.216772015	0.107490395	0.200839361	0.153486445	0.297854593	0.385696902	0.116020129	0.261044774	0.346728559
ENSMUSG00000073616	Cops9	66915	COP9 signalosome subunit 9 [Source:MGI Symbol;Acc:MGI:1914165]	3.4682422	3.169004421	3.386716407	3.294693678	2.971370632	3.374721197	2.549842479	2.701821214	2.410412767	2.966351352	2.856653935	3.095095642	0.396904982	0.026881677	0.07031449	-0.137368241	0.454094078	0.548497951	0.780005208	0.000597935	0.005780453	0.245731985	0.193070616	0.314841765	0.642636968	0.008166074	0.019647229	0.383100226	0.019139186	0.039360707
ENSMUSG00000047067	Dusp28		dual specificity phosphatase 28 [Source:MGI Symbol;Acc:MGI:1914696]	1.079052648	0.236486009	0.858710044	-0.729150829	0.261226128	0.555934931	0.626996394	0.84275119	0.522184884	-0.008183426	0.873965051	0.966201821	-0.055380677	0.889006555	0.926474492	-0.580469272	0.224370759	0.311522695	0.079304117	0.849745439	0.91435423	-0.445784478	0.345417586	0.484340028	-0.501165155	0.340633493	0.429876497	0.134684794	0.710281959	0.777866533
ENSMUSG00000026269	Rnpepl1	108657	arginyl aminopeptidase (aminopeptidase B)-like 1 [Source:MGI Symbol;Acc:MGI:1914170]	7.117390291	7.003961677	7.002623203	6.403940259	6.679623898	6.549528049	7.281407912	7.228923348	7.3042517	6.822371725	6.948845073	6.825920752	-0.394416637	0.001996077	0.009621617	-0.457488509	0.001268325	0.004664963	-0.234387565	0.04366768	0.128796479	-0.297459436	0.017813738	0.04936534	-0.691876073	0.000155765	0.000769247	0.160029072	0.086661727	0.139502285
ENSMUSG00000026270	Capn10	23830	calpain 10 [Source:MGI Symbol;Acc:MGI:1344392]	3.30784966	3.273164962	3.267501584	2.053196855	2.690673056	2.787925061	3.332634581	3.306827692	3.414718657	2.081266307	2.308089067	2.349255508	-1.10717602	2.50088E-05	0.000362276	-0.690972338	0.002978615	0.009315329	-0.071226655	0.680988014	0.800277043	0.344977027	0.085144289	0.16758635	-0.762198993	0.003422119	0.00956156	1.035949365	1.7339E-05	0.000149611
ENSMUSG00000026271	Gpr35	64095	G protein-coupled receptor 35 [Source:MGI Symbol;Acc:MGI:1929509]	5.867022086	5.75815547	5.965991225	7.960079858	8.058368636	8.093756069	4.620813597	4.849466956	4.35266784	6.173977751	5.954719625	6.23522694	1.491729662	4.39028E-07	1.7132E-05	2.197155842	2.18476E-08	1.39223E-06	1.242252598	4.44917E-06	0.000176187	1.947678777	7.7502E-08	6.56498E-06	3.43940844	8.18756E-10	1.09367E-07	-0.249477065	0.069427312	0.115812226
ENSMUSG00000014602	Kif1a	16560	kinesin family member 1A [Source:MGI Symbol;Acc:MGI:108391]	1.989061699	3.194055477	2.669305491	5.928709061	4.486204665	4.827879069	1.264345289	1.452870553	1.181550317	3.159111616	2.933874667	3.07118123	1.733477435	0.000195137	0.001708153	2.302708994	5.25345E-05	0.000372732	1.322409144	0.002262012	0.015276554	1.891640703	0.000280351	0.001916884	3.625118138	2.32541E-06	2.93411E-05	-0.41106829	0.176807296	0.251841172
ENSMUSG00000047793	Sned1	208777	sushi, nidogen and EGF-like domains 1 [Source:MGI Symbol;Acc:MGI:3045960]	0.173030963	0.354242238	0.732119443	1.600912806	0.99243274	0.30090936	1.071069062	1.480617215	0.693796786	0.436629406	0.957296237	0.805942902	-0.339740256	0.330324756	0.465638915	0.399310791	0.32544006	0.420051409	-0.661828813	0.08672859	0.205252737	0.077222234	0.846255407	0.901063855	-0.262518022	0.556537922	0.637813278	-0.322088558	0.312031409	0.401290532
ENSMUSG00000026273	Mterf4	69821	mitochondrial transcription termination factor 4 [Source:MGI Symbol;Acc:MGI:1918355]	3.182125591	2.768012039	2.851065497	3.267679232	2.458980072	2.092834803	2.895494723	2.725928267	2.960268616	2.676706346	2.885747845	2.320382666	-0.182519234	0.456263423	0.585642749	-0.439783272	0.130986402	0.201848374	0.07671128	0.764244229	0.860315754	-0.180552758	0.517184999	0.64744832	-0.363071992	0.256925478	0.341028926	0.259230514	0.248078058	0.332141517
ENSMUSG00000100351	Gm7867		predicted gene 7867 [Source:MGI Symbol;Acc:MGI:3644627]	2.466091709	2.553483381	2.317355204	2.796675232	2.702042329	2.779033529	1.566195556	1.668226405	1.351669517	1.974884066	1.926620459	1.771506409	0.375276843	0.03721218	0.090109242	0.311803518	0.114209666	0.180386618	0.916059734	0.000194763	0.002564823	0.852586408	0.000662361	0.003720791	1.227863251	8.73692E-05	0.000490595	0.540782891	0.00305299	0.008739363
ENSMUSG00000026274	Pask	269224	PAS domain containing serine/threonine kinase [Source:MGI Symbol;Acc:MGI:2155936]	2.758127677	1.52536928	2.162808212	0.292021488	0.531882649	0.676040002	1.381126158	0.791505808	2.037995495	0.586040735	0.360358449	0.469265162	-0.932267457	0.026213169	0.069020725	-1.637318923	0.002558533	0.008253069	0.785280157	0.065309402	0.170093404	0.080228691	0.852858753	0.905319309	-0.852038766	0.097876403	0.154858374	1.717547614	0.000297271	0.001317395
ENSMUSG00000026275	Ppp1r7	66385	protein phosphatase 1, regulatory subunit 7 [Source:MGI Symbol;Acc:MGI:1913635]	5.252198421	5.267207807	5.154192763	5.036170737	5.069993442	5.086418427	5.267133282	5.34193196	5.101671057	5.529758065	5.457951439	5.398144273	0.231565041	0.034775417	0.085474185	-0.157640221	0.169555693	0.248440848	-0.007000656	0.94624577	0.971728185	-0.396205919	0.003544889	0.013852487	-0.164640877	0.205127631	0.283496551	-0.238565698	0.017165549	0.03599997
ENSMUSG00000034107	Ano7	404545	anoctamin 7 [Source:MGI Symbol;Acc:MGI:3052714]	3.388593941	2.84630641	3.21295557	-0.421280475	1.193673486	0.993250446	2.457935404	2.063004293	2.87057633	1.954133488	1.20899442	1.798319812	-0.852814314	0.030419039	0.077268475	-2.388841471	8.10637E-05	0.000519915	0.695033223	0.081854567	0.197451579	-0.840993933	0.056066946	0.121757389	-1.693808248	0.002799464	0.008098742	1.547847538	0.000407365	0.001701991
ENSMUSG00000034088	Hdlbp	110611	high density lipoprotein (HDL) binding protein [Source:MGI Symbol;Acc:MGI:99256]	7.830912601	7.786558602	7.959526971	8.357379712	8.231928222	8.189621401	7.752053717	7.753536731	7.839572385	7.826199616	7.931939431	7.992479416	0.126717745	0.244179923	0.37166073	0.394964014	0.004652445	0.013209027	0.06143287	0.581117798	0.72441569	0.329679139	0.013419583	0.03926156	0.456396884	0.004705052	0.012431074	-0.065284875	0.47961344	0.570431633
ENSMUSG00000026276	Sept2		septin 2 [Source:MGI Symbol;Acc:MGI:97298]	6.342826034	6.449369464	6.467855579	6.543287503	6.635291876	6.620386353	6.53011717	6.58062921	6.501755414	6.531117142	6.510391287	6.592608921	-0.000425447	0.996151111	0.997515406	0.18465222	0.075524349	0.12855117	-0.114164791	0.233980336	0.401389827	0.070912875	0.467991597	0.603395601	0.070487429	0.529303658	0.612757201	-0.113739344	0.158015508	0.229690011
ENSMUSG00000116048	Sept2	18000	septin 2 [Source:MGI Symbol;Acc:MGI:97298]	6.208847038	6.367609915	6.341178844	6.448069011	6.521354019	6.558034097	6.406016198	6.451124446	6.393321034	6.42577498	6.416737274	6.495259616	0.021256773	0.813752076	0.874633953	0.202378892	0.059401639	0.105700981	-0.103722346	0.28682931	0.46038507	0.077399772	0.439442177	0.577365665	0.098656546	0.392899345	0.481786363	-0.12497912	0.131919262	0.196865655
ENSMUSG00000034066	Farp2	227377	FERM, RhoGEF and pleckstrin domain protein 2 [Source:MGI Symbol;Acc:MGI:2385126]	2.989866609	2.520857096	2.886799708	3.004884856	2.90240821	2.817738799	3.150424467	2.980910078	3.438023089	2.850733617	3.28821651	3.154275079	-0.079037812	0.692294977	0.786567581	0.096378465	0.671905119	0.742571271	-0.396801847	0.079429823	0.193641247	-0.221385569	0.339648594	0.478393823	-0.300423381	0.254213236	0.338010171	-0.317764035	0.096337846	0.151514248
ENSMUSG00000026277	Stk25	59041	serine/threonine kinase 25 (yeast) [Source:MGI Symbol;Acc:MGI:1891699]	5.448663181	5.315948211	5.609492257	5.515013813	5.365600886	5.280664114	5.478344784	5.46839253	5.618017636	5.436928751	5.667124935	5.725144445	0.079433384	0.533623282	0.654173547	-0.081304818	0.565703174	0.648651635	-0.081073817	0.546729705	0.69814956	-0.24181202	0.106106809	0.199103257	-0.162378635	0.322683744	0.41099501	-0.160507202	0.169131625	0.242925614
ENSMUSG00000026279	Thap4	67026	THAP domain containing 4 [Source:MGI Symbol;Acc:MGI:1914276]	3.258739986	2.913857771	3.233750349	2.634986907	3.127327549	3.315427539	3.934225042	3.952353171	3.98944566	2.918020948	2.86724631	3.206742184	-0.989018903	0.000119128	0.001171487	-0.036708257	0.853251058	0.888291644	-0.830890059	0.000741671	0.006703509	0.121420587	0.544408058	0.670887673	-0.867598316	0.002207382	0.006659056	0.158128844	0.323542206	0.413035133
ENSMUSG00000026280	Atg4b	66615	autophagy related 4B, cysteine peptidase [Source:MGI Symbol;Acc:MGI:1913865]	5.376109261	5.433402007	5.550484953	5.653110893	5.599208823	5.421896928	5.669336386	5.63881723	5.756532641	5.549944682	5.568101699	5.610294271	-0.117204851	0.235147658	0.36167751	0.09206244	0.393047582	0.488129538	-0.236903862	0.034797927	0.109344673	-0.027636571	0.79463545	0.867141872	-0.144841422	0.24656704	0.329895919	-0.119699011	0.173665291	0.248180046
ENSMUSG00000026281	Dtymk	21915	deoxythymidylate kinase [Source:MGI Symbol;Acc:MGI:108396]	4.524991879	4.456722459	4.381773502	3.332819943	3.552286883	3.507604637	3.918477698	4.041529477	3.730615469	3.626626516	3.957107221	3.717706246	-0.10915742	0.442951419	0.573163293	-0.965241003	6.6262E-05	0.000445769	0.556201005	0.002735727	0.017684841	-0.299882579	0.0801375	0.160106118	-0.409039999	0.039976617	0.0734889	0.665358425	0.000210585	0.001014722
ENSMUSG00000026283	Ing5	66262	inhibitor of growth family, member 5 [Source:MGI Symbol;Acc:MGI:1922816]	4.590925828	4.67836712	4.498601256	5.00832934	5.074482671	5.146078268	4.77099579	4.690145589	4.86570213	5.573414902	5.777964819	5.599615369	0.889540713	4.44946E-06	9.97841E-05	0.493362124	0.00167566	0.005876868	-0.180761745	0.136878461	0.280252848	-0.576940333	0.000532081	0.003124119	0.31260038	0.042065955	0.076700387	-1.070302458	2.16223E-07	5.31446E-06
ENSMUSG00000073609	D2hgdh	98314	D-2-hydroxyglutarate dehydrogenase [Source:MGI Symbol;Acc:MGI:2138209]	4.135359518	3.81020397	3.934275071	2.483859438	2.879902714	2.547232502	3.682482607	3.651329773	3.657745831	3.181768826	3.514334735	3.229032724	-0.328489095	0.055982403	0.122589462	-1.290745624	1.37872E-05	0.000131474	0.293978358	0.097301456	0.221928355	-0.668278172	0.002841456	0.011616688	-0.996767267	0.000369175	0.001540265	0.622467453	0.00088067	0.003153975
ENSMUSG00000101660	Gm18666		predicted gene, 18666 [Source:MGI Symbol;Acc:MGI:5010851]	1.352307525	1.488756293	0.935132895	-0.400891157	-0.426188332	0.164546174	0.879471882	0.949505342	0.807715822	-0.121475253	0.904460236	0.241676326	-0.473660388	0.196609412	0.316012721	-1.408236811	0.004856258	0.013700879	0.358993176	0.344514105	0.520216299	-0.575583247	0.179910454	0.29871113	-1.049243635	0.038759994	0.071602904	0.832653564	0.0225213	0.045029634
ENSMUSG00000099624	Gm7889		predicted gene 7889 [Source:MGI Symbol;Acc:MGI:3648247]	1.152243251	1.649471483	0.57644399	-1.463706641	-0.079405596	-0.493373104	0.767692024	0.711156412	0.577784344	-0.300943605	0.555094649	-0.583831084	-0.687545262	0.139180276	0.245591032	-1.644005902	0.007349261	0.019129836	0.412419999	0.383869359	0.557407038	-0.544040641	0.302446172	0.439082686	-1.231585903	0.050004132	0.088604261	1.099965261	0.017285789	0.036186586
ENSMUSG00000026285	Pdcd1	18566	programmed cell death 1 [Source:MGI Symbol;Acc:MGI:104879]	5.693425281	6.034016245	5.437967484	4.050510506	4.454999144	5.224337963	2.653610167	2.62828695	2.699100044	2.213568954	2.39730221	2.337468539	-0.338325093	0.146799002	0.254828652	-1.057558536	0.00125097	0.004614571	3.065176789	3.72489E-08	5.35043E-06	2.345943347	1.19517E-06	3.87024E-05	2.007618254	1.69142E-05	0.000133887	3.403501883	2.199E-09	2.02446E-07
ENSMUSG00000100347	Gm7895		predicted gene 7895 [Source:MGI Symbol;Acc:MGI:3648340]	2.032277057	2.165361447	2.281387034	2.770789911	2.721182244	2.636702808	2.583560016	2.621719556	2.608085736	2.566921134	2.494668515	2.673147483	-0.043288657	0.761149009	0.83766791	0.535264762	0.006227794	0.016698805	-0.44536878	0.011330734	0.049436732	0.133184639	0.419690867	0.557939998	0.089895981	0.624675163	0.698992135	-0.402080123	0.008252383	0.019670917
ENSMUSG00000051185	Fam174a	67698	family with sequence similarity 174, member A [Source:MGI Symbol;Acc:MGI:1914948]	4.151282699	4.214365455	4.082177745	4.041817093	4.586595828	4.316999803	4.11408266	3.96160301	4.235168778	4.135798154	4.184167742	4.031674129	0.029518178	0.821640393	0.88052367	0.213902667	0.167282783	0.245706537	0.051920042	0.707726351	0.821090234	0.236304531	0.130969465	0.233889678	0.265822708	0.132543659	0.199193537	0.022401864	0.848214691	0.888374433
ENSMUSG00000103973	BC055308		cDNA sequence BC055308 [Source:MGI Symbol;Acc:MGI:3039612]	-0.088762821	0.566334832	0.411598086	1.606421284	1.596969221	0.851041307	-0.542533835	-1.296757574	0.583601983	0.413099835	1.357922296	0.852196692	1.348915322	0.016251994	0.048005378	0.995567176	0.099486715	0.160892835	0.707945068	0.185994278	0.344419155	0.354596922	0.53598839	0.664057369	1.703512244	0.01861753	0.038729369	-0.640970254	0.167400322	0.240962104
ENSMUSG00000081051	Gm15427		predicted pseudogene 15427 [Source:MGI Symbol;Acc:MGI:3642341]	5.732313515	5.498022984	5.63885258	5.927108871	5.947290355	5.819245819	4.889767375	4.944250956	4.776605042	5.03462091	5.030370576	4.997545571	0.154783494	0.1426414	0.249662887	0.283048853	0.025190574	0.052403034	0.744284111	1.7676E-05	0.000460705	0.872549469	6.73183E-06	0.000119436	1.027332963	4.91673E-06	5.18233E-05	0.589500616	2.97832E-05	0.00022444
ENSMUSG00000040710	St8sia4	20452	ST8 alpha-N-acetyl-neuraminide alpha-2,8-sialyltransferase 4 [Source:MGI Symbol;Acc:MGI:106018]	4.884854777	5.258142799	4.714685036	0.681169339	1.782038423	1.525851161	5.228104783	5.197973474	5.093617894	2.831090034	2.838988547	2.55956538	-2.402214453	1.75499E-07	8.55451E-06	-3.513286175	1.26206E-08	9.64339E-07	-0.207439958	0.365392906	0.54000407	-1.318511681	0.000167825	0.001299567	-3.720726133	2.47673E-08	1.12809E-06	2.194774495	1.43907E-07	3.91223E-06
ENSMUSG00000044757	Gm6430		predicted gene 6430 [Source:MGI Symbol;Acc:MGI:3648857]	4.752517082	4.711146945	4.750937102	5.080298931	5.127395459	5.106367	4.858796444	4.932717256	4.728422587	5.212075177	4.999857227	5.108682772	0.258832849	0.026501063	0.069580944	0.372669593	0.007242096	0.018907573	-0.10197642	0.359467789	0.534202667	0.011860324	0.918632601	0.948677489	0.270693173	0.059474859	0.102503408	-0.360809269	0.002027862	0.006232263
ENSMUSG00000044768	D1Ertd622e	52392	DNA segment, Chr 1, ERATO Doi 622, expressed [Source:MGI Symbol;Acc:MGI:1277184]	5.728507638	5.829461271	5.826313104	6.003225138	6.478966125	6.431321611	6.368848369	6.381041468	6.32726813	6.873608204	6.555850861	6.794401067	0.36678997	0.015258601	0.045713282	0.560341373	0.002065439	0.00696265	-0.556719735	0.001646733	0.012116746	-0.363168332	0.025083694	0.06468585	0.003621638	0.982461948	0.986653764	-0.923509705	4.71979E-06	5.64263E-05
ENSMUSG00000040648	Ppip5k2	227399	diphosphoinositol pentakisphosphate kinase 2 [Source:MGI Symbol;Acc:MGI:2142810]	5.842525227	5.924654765	5.937351818	5.876061085	5.883355134	5.877244766	5.918360257	6.027452308	5.84095966	5.473544243	5.720383291	5.661162909	-0.309054213	0.012336663	0.03895021	-0.025686604	0.826138597	0.867549529	-0.028126671	0.801109798	0.884630248	0.255240939	0.047284889	0.106463806	-0.053813274	0.688756451	0.754525143	0.280927542	0.010249978	0.023504902
ENSMUSG00000026333	Gin1	252876	gypsy retrotransposon integrase 1 [Source:MGI Symbol;Acc:MGI:2182036]	1.622283917	1.791018945	2.360447553	1.773853703	0.904818683	1.477950487	1.924879744	2.085440038	2.174918928	1.038165505	1.368245765	2.045309198	-0.642892023	0.065433834	0.138336147	-0.60703897	0.122569289	0.191253797	-0.143845151	0.673396454	0.795651629	-0.107992098	0.771687808	0.850748911	-0.750884121	0.09163962	0.146648727	0.499046872	0.10778169	0.166311589
ENSMUSG00000026335	Pam	18484	peptidylglycine alpha-amidating monooxygenase [Source:MGI Symbol;Acc:MGI:97475]	1.553007764	1.433316639	1.041032576	1.185306753	0.894132683	0.840417011	-0.336843622	0.29835337	-1.351084512	0.755540934	1.25120754	0.45071724	1.348839815	0.006621538	0.024328591	-0.39617212	0.417202869	0.512764953	1.793363172	0.001470907	0.01118437	0.048351236	0.920115226	0.94978754	1.397191052	0.022028883	0.044590594	0.444523356	0.252670684	0.337477275
ENSMUSG00000089782	Gm3531		predicted pseudogene 3531 [Source:MGI Symbol;Acc:MGI:3781708]	3.41716579	3.478849712	3.37091269	4.167320585	3.992516555	3.725607077	3.448869213	3.384391567	3.442611166	3.587863578	3.568169489	3.33906896	0.093316911	0.484597816	0.611587468	0.502574444	0.00562233	0.015399331	0.002464965	0.985874136	0.992878317	0.411722498	0.017100194	0.047673267	0.505039409	0.010986347	0.025057025	-0.090851946	0.448784883	0.5400658
ENSMUSG00000089791	Gm3555		predicted pseudogene 3555 [Source:MGI Symbol;Acc:MGI:3781732]	-0.012523465	-0.273973119	0.405670171	2.537690247	2.238805983	2.509302122	-1.3024764	0.056579271	-2.911757115	1.817698556	1.123818094	2.055284943	2.949668321	0.000469186	0.003265939	2.354911092	0.006299863	0.016846526	1.428235851	0.045789862	0.133427923	0.833478622	0.259837502	0.392952599	3.783146943	0.000514628	0.002011595	-1.52143247	0.018041865	0.037447719
ENSMUSG00000082431	Prdx2-ps1		peroxiredoxin 2, pseudogene 1 [Source:MGI Symbol;Acc:MGI:1321403]	1.201741531	0.787807936	1.315647754	0.50249078	0.996430388	0.425793855	0.735217114	0.356826299	1.265734533	0.79565228	0.962153512	1.013143298	0.1394447	0.631496082	0.736833829	-0.47664932	0.174868002	0.254586699	0.339597499	0.279192385	0.451307961	-0.276496521	0.41908972	0.557608887	-0.137051821	0.715760519	0.777248896	0.200152799	0.45340078	0.544676897
ENSMUSG00000067017	Gm3608		predicted gene 3608 [Source:MGI Symbol;Acc:MGI:3804932]	6.265442019	6.175452787	6.197590615	6.569246915	6.783615406	6.778479429	6.416309297	6.426179553	6.386098442	6.609445363	6.625225219	6.632210334	0.213549441	0.030026005	0.076606292	0.529680774	0.000147695	0.000834395	-0.201830818	0.04685948	0.135513996	0.114300514	0.248818115	0.380136506	0.327849955	0.011314526	0.02566646	-0.41538026	0.000170523	0.000857366
ENSMUSG00000056536	Pign	27392	phosphatidylinositol glycan anchor biosynthesis, class N [Source:MGI Symbol;Acc:MGI:1351629]	6.975369991	7.226046096	7.036887791	6.869692142	7.104868981	7.196197694	6.373804082	6.475058785	6.241623022	6.644619177	6.66280644	6.662868377	0.293024539	0.024332605	0.065269078	-0.015730527	0.899941164	0.925645161	0.73850304	6.20559E-05	0.001129264	0.429747975	0.004939355	0.017850553	0.722772514	0.000334888	0.001418807	0.445478501	0.000813159	0.002965714
ENSMUSG00000026319	Relch	227446	RAB11 binding and LisH domain, coiled-coil and HEAT repeat containing [Source:MGI Symbol;Acc:MGI:1922832]	5.962973039	5.745848751	6.295361027	6.30389625	6.446509575	6.071513839	5.991058711	6.058959097	6.067814556	5.696792252	5.89877416	6.090959796	-0.164127041	0.35131288	0.487312883	0.306398026	0.126823069	0.196478875	-0.073662382	0.686319448	0.804479123	0.396862685	0.055933136	0.121580837	0.232735644	0.297879503	0.385696902	0.090464659	0.552712401	0.638208019
ENSMUSG00000101330	Gm10193		predicted gene 10193 [Source:MGI Symbol;Acc:MGI:3708520]	1.361030526	1.194448436	1.318529804	0.524151413	1.198981966	1.400846538	1.161043837	1.099523887	1.258125521	1.235748299	0.943312837	1.324368154	-0.037522336	0.870302696	0.914528655	-0.159099327	0.553990355	0.638348533	0.123475382	0.612893089	0.749433218	0.001898391	0.994328153	0.996916883	-0.035623945	0.904806307	0.929633105	0.160997719	0.447407441	0.538795853
ENSMUSG00000026321	Tnfrsf11a	21934	tumor necrosis factor receptor superfamily, member 11a, NFKB activator [Source:MGI Symbol;Acc:MGI:1314891]	6.970547026	7.162456572	6.888361411	5.644208045	6.037481543	5.989460752	7.1904337	7.156432795	7.12208417	6.867872843	6.747437188	6.662144266	-0.385844915	0.008342829	0.028873588	-1.091556725	4.42871E-06	5.60211E-05	-0.119758558	0.363668806	0.538306113	-0.825470367	5.98345E-05	0.000593531	-1.211315282	6.47929E-06	6.46162E-05	0.266086358	0.027246971	0.052732644
ENSMUSG00000038866	Zcchc2	227449	zinc finger, CCHC domain containing 2 [Source:MGI Symbol;Acc:MGI:2444114]	6.424632569	6.530186929	6.591232965	6.025427666	6.006194682	5.964491089	6.690399334	6.68543585	6.752696088	6.113788195	6.073258154	6.174918636	-0.598768067	2.92076E-05	0.000409436	-0.524007354	0.000201464	0.001063755	-0.193331262	0.060632242	0.162106064	-0.11857055	0.244185687	0.374887249	-0.717338616	4.58405E-05	0.000294141	0.405436804	0.000258157	0.001184387
ENSMUSG00000044340	Phlpp1	98432	PH domain and leucine rich repeat protein phosphatase 1 [Source:MGI Symbol;Acc:MGI:2138327]	4.013065471	4.572725813	4.140408292	3.75755677	3.937430526	4.196682312	4.487025361	4.516368107	4.497175841	4.336118412	4.450261399	4.418874183	-0.097709758	0.54461376	0.663382	-0.257107951	0.173320671	0.25270474	-0.247201867	0.162119028	0.314459305	-0.40660006	0.041998761	0.097111649	-0.504309817	0.028332832	0.055087432	-0.149492109	0.307201203	0.396473347
ENSMUSG00000057329	Bcl2	12043	B cell leukemia/lymphoma 2 [Source:MGI Symbol;Acc:MGI:88138]	3.793322778	4.158728455	3.938328637	3.611110817	3.85608707	3.99679621	3.890626087	4.184274025	3.550893833	4.17677243	4.235254643	4.295455893	0.35274825	0.058867614	0.127401293	-0.112805106	0.563920986	0.647009443	0.091000116	0.616638069	0.752489112	-0.37455324	0.074147864	0.151190684	-0.02180499	0.920805414	0.941267756	-0.261748134	0.108414329	0.167150725
ENSMUSG00000009905	Kdsr	70750	3-ketodihydrosphingosine reductase [Source:MGI Symbol;Acc:MGI:1918000]	5.071738074	5.019564522	4.895217854	3.871597673	4.251888472	4.373308058	5.596545357	5.603515987	5.499415998	5.47639308	5.235428462	5.313540219	-0.227484771	0.086758364	0.17217817	-0.779034991	0.000127834	0.000743977	-0.567011685	0.000991259	0.008335697	-1.118561905	4.85418E-06	9.71421E-05	-1.346046676	2.80235E-06	3.38524E-05	-0.339526914	0.009020142	0.021181172
ENSMUSG00000009907	Vps4b	20479	vacuolar protein sorting 4B [Source:MGI Symbol;Acc:MGI:1100499]	6.507447289	6.675310117	6.569550826	6.479436262	6.653131104	6.620731714	6.901835064	7.009965555	6.75419818	6.866386086	6.932921918	6.887940786	0.010277579	0.921042996	0.947927789	0.006607294	0.953330442	0.965633722	-0.290127569	0.019773135	0.073722059	-0.293797854	0.022420647	0.059214379	-0.283520275	0.047949971	0.085564675	-0.300405148	0.00583204	0.014776346
ENSMUSG00000100025	Gm8141		predicted gene 8141 [Source:MGI Symbol;Acc:MGI:3647473]	-0.354929327	0.067200129	0.431282432	1.589715705	1.024779045	0.831975245	0.251224323	0.469122415	0.249968466	0.383824165	0.562274864	0.953132447	0.270620386	0.402540431	0.536587497	1.009495239	0.017495514	0.038986263	-0.280395564	0.410522231	0.581461545	0.45847929	0.232099828	0.360986433	0.729099676	0.098066237	0.155075261	-0.55101595	0.07768281	0.127410814
ENSMUSG00000038702	Dsel	319901	dermatan sulfate epimerase-like [Source:MGI Symbol;Acc:MGI:2442948]	3.290889134	3.304542146	3.180242419	3.187210635	2.927743629	3.251820269	3.542153362	3.338394145	3.828759587	3.271108258	3.325024934	3.290827035	-0.270388412	0.089419561	0.176229278	-0.146494824	0.393604225	0.488733455	-0.311158133	0.067045417	0.17283261	-0.187264545	0.281228668	0.416354022	-0.457652957	0.031793498	0.060711377	-0.040769721	0.760110455	0.819706136
ENSMUSG00000026374	Tsn		translin [Source:MGI Symbol;Acc:MGI:109263]	5.716062194	6.061729155	5.966165974	6.059939038	6.222799626	6.072507615	6.226054592	6.310908571	6.156160662	6.069580984	6.149121845	6.136053902	-0.114193666	0.329551312	0.464818033	0.198739151	0.134291734	0.205913993	-0.297894435	0.028112185	0.094104693	0.015038381	0.904992601	0.939833835	-0.099155284	0.497385611	0.582800347	-0.18370077	0.087484101	0.14041931
ENSMUSG00000026377	Nifk	67949	nucleolar protein interacting with the FHA domain of MKI67 [Source:MGI Symbol;Acc:MGI:1915199]	4.487815865	4.630944998	4.625646278	5.535047168	5.462838	5.401526198	4.689123767	4.768582842	4.58051435	5.486464579	5.265608876	5.387749433	0.689931158	4.34222E-05	0.000541492	0.868962792	1.49984E-05	0.000140878	-0.093302013	0.421351031	0.591492373	0.085729621	0.485315101	0.619409134	0.775660779	0.000128553	0.000659961	-0.783233171	4.44339E-06	5.39577E-05
ENSMUSG00000064302	Clasp1	76707	CLIP associating protein 1 [Source:MGI Symbol;Acc:MGI:1923957]	5.528728051	5.430098159	5.524014149	5.25560379	5.155943904	5.252007782	5.685036588	5.662603015	5.758822065	5.483288801	5.521536988	5.577697378	-0.180272402	0.060624716	0.130270465	-0.276083649	0.014935141	0.034243106	-0.21599639	0.036881047	0.113982537	-0.311807637	0.007702079	0.025187683	-0.492080039	0.000906837	0.003185278	-0.035723988	0.647942588	0.725027663
ENSMUSG00000004451	Ralb	64143	v-ral simian leukemia viral oncogene B [Source:MGI Symbol;Acc:MGI:1927244]	6.618624251	6.46228045	6.514140021	5.724661974	6.09617051	6.057604894	6.742433483	6.672360395	6.806825252	6.518582298	6.510995495	6.537900747	-0.217697375	0.05295265	0.118038866	-0.516473183	0.000637715	0.002686214	-0.218147082	0.063183263	0.166839364	-0.516922891	0.000645578	0.003659067	-0.734620266	0.000117289	0.000614166	-0.000449707	0.995988642	0.997065232
ENSMUSG00000098923	Tmem185b	226351	transmembrane protein 185B [Source:MGI Symbol;Acc:MGI:1917634]	6.025763275	6.172502718	6.063335605	6.152998144	6.520399003	6.575403216	6.292772665	6.416378671	6.135316102	6.721973196	6.768992751	6.793807789	0.478290627	0.001377913	0.007365127	0.36197881	0.013429797	0.031376849	-0.182672712	0.151423632	0.299949721	-0.298984529	0.033797347	0.081782397	0.179306098	0.232381052	0.314244872	-0.660963339	3.24285E-05	0.000238937
ENSMUSG00000026383	Epb41l5	226352	erythrocyte membrane protein band 4.1 like 5 [Source:MGI Symbol;Acc:MGI:103006]	1.972585434	2.231744273	1.95635139	2.031384864	2.087699144	2.477742472	2.158158529	2.273155081	2.016447197	2.390796945	2.231201005	2.363564704	0.166473932	0.34408658	0.479443408	0.18189111	0.366313456	0.461655314	-0.099633214	0.586791562	0.728478109	-0.084216035	0.671241876	0.775279514	0.082257897	0.711703838	0.773629869	-0.266107146	0.107825128	0.166341663
ENSMUSG00000026384	Ptpn4	19258	protein tyrosine phosphatase, non-receptor type 4 [Source:MGI Symbol;Acc:MGI:1099792]	4.905631153	5.318626695	4.985128773	4.435130022	4.663643952	4.747217179	5.093774112	5.091531922	5.086308165	4.993331067	4.96721926	4.936823971	-0.122478734	0.347729799	0.483259541	-0.439570268	0.009405817	0.023467244	-0.004442941	0.973698872	0.986049332	-0.321534475	0.042394955	0.097809929	-0.444013209	0.017568809	0.036908176	0.118035793	0.309990222	0.399182811
ENSMUSG00000036975	Tmem177	66343	transmembrane protein 177 [Source:MGI Symbol;Acc:MGI:1913593]	3.668630727	3.699191556	3.306238734	2.420710429	2.941138888	3.000363693	3.778102367	3.730858752	3.732154718	2.82753492	3.223241174	2.787175714	-0.76081765	0.001870201	0.009177262	-0.703641708	0.006997999	0.018373881	-0.185826152	0.366909024	0.541696918	-0.12865021	0.558305745	0.682384604	-0.88946786	0.003476031	0.009681039	0.574991498	0.005693074	0.014508931
ENSMUSG00000050777	Tmem37		transmembrane protein 37 [Source:MGI Symbol;Acc:MGI:2157899]	5.343492361	5.292380223	4.874419879	3.743490129	4.177891407	4.347077093	5.309930612	5.334622619	5.078468107	5.347840486	5.334038134	5.052070383	0.032680738	0.849602464	0.901105316	-1.023613506	0.000206172	0.001081626	-0.058553496	0.747817306	0.849381615	-1.11484774	0.000101289	0.000881712	-1.082167002	0.000373043	0.00155252	-0.091234235	0.553619492	0.638936777
ENSMUSG00000026385	Dbi	13167	diazepam binding inhibitor [Source:MGI Symbol;Acc:MGI:94865]	3.364829116	3.046995794	3.153590933	2.970329626	3.2480359	3.212236878	2.944178866	3.127975033	2.595470143	3.010619041	2.707989225	2.801802576	-0.055678305	0.755255966	0.833214868	-0.010246816	0.959722226	0.970127422	0.298459731	0.132837749	0.274773974	0.343891221	0.111248222	0.206033902	0.288212915	0.22389318	0.30496363	0.354138037	0.044865858	0.0803502
ENSMUSG00000026388	3110009E18Rik	73103	RIKEN cDNA 3110009E18 gene [Source:MGI Symbol;Acc:MGI:1920353]	0.851606982	0.195009299	0.277516539	-0.302711572	-0.269676031	0.045778702	0.408536901	0.752670414	-0.010915713	-1.462776711	-0.134362114	-0.870749009	-1.136653288	0.027470941	0.071492377	-0.591179151	0.279016031	0.370882279	0.059121231	0.902521457	0.946536923	0.604595368	0.270220634	0.404472045	-0.53205792	0.378585574	0.467951846	1.195774519	0.013523349	0.029469234
ENSMUSG00000026389	Steap3	68428	STEAP family member 3 [Source:MGI Symbol;Acc:MGI:1915678]	2.584379659	2.492004476	2.897888009	2.416911591	2.363564761	2.255968212	1.686497247	2.01981529	1.294700158	2.15405075	1.48932703	2.080116077	0.185687667	0.488832537	0.615392986	-0.332944363	0.286778606	0.379205063	0.992569232	0.004017588	0.023274536	0.473937202	0.139503914	0.24550144	0.659624869	0.07394633	0.122907684	0.806881565	0.00547327	0.014070071
ENSMUSG00000003721	Insig2	72999	insulin induced gene 2 [Source:MGI Symbol;Acc:MGI:1920249]	4.821587477	4.77020167	4.662947118	3.947257898	4.583420397	4.201900946	5.073022508	5.15592379	4.777784023	5.236627868	5.008844523	4.902376019	0.060974802	0.699538269	0.792270148	-0.448751326	0.024840343	0.051775251	-0.242206	0.163870647	0.316751222	-0.751932127	0.001162422	0.00574675	-0.690957326	0.004796056	0.012623494	-0.303180801	0.048765234	0.086135619
ENSMUSG00000026339	Ccdc93	70829	coiled-coil domain containing 93 [Source:MGI Symbol;Acc:MGI:1918079]	7.166889549	7.269861259	7.275492507	5.924673184	6.218984463	6.139435473	7.340818547	7.277091495	7.472991953	6.854339621	6.973719551	6.981949032	-0.429339738	0.001556462	0.008041047	-1.114519582	7.68763E-07	1.55002E-05	-0.122604563	0.280563961	0.452988982	-0.807784406	1.76306E-05	0.000235958	-1.237124144	1.14961E-06	1.79644E-05	0.306735176	0.00558566	0.014292868
ENSMUSG00000001674	Ddx18	66942	DEAD (Asp-Glu-Ala-Asp) box polypeptide 18 [Source:MGI Symbol;Acc:MGI:1914192]	4.918129403	4.947221342	5.063600244	5.422097869	5.260359729	5.065108045	5.195346239	5.076870425	5.32351973	5.485417896	5.08377421	5.268991754	0.066837369	0.639004837	0.743160753	0.245801757	0.140928512	0.21421788	-0.219987884	0.160595851	0.312425414	-0.041023496	0.796175813	0.868373588	0.025813873	0.886267046	0.915119801	-0.286825253	0.039523295	0.072234918
ENSMUSG00000100405	Gm28911		predicted gene 28911 [Source:MGI Symbol;Acc:MGI:5579617]	1.963999554	2.170250356	1.908049537	2.313487463	2.63779761	1.929773337	1.738658589	1.745928888	1.526692129	1.569760858	1.422723449	1.052826165	-0.288865967	0.207695296	0.329899732	0.266967919	0.306316793	0.399788885	0.346330039	0.157235601	0.307650278	0.902163926	0.004002273	0.015195291	0.613297959	0.050093517	0.088728692	0.635196006	0.007771686	0.018734039
ENSMUSG00000026341	Actr3	74117	ARP3 actin-related protein 3 [Source:MGI Symbol;Acc:MGI:1921367]	7.857113928	7.805758854	7.873762861	8.856442694	8.820913598	8.913462999	7.637863772	7.741460525	7.534039025	8.275427994	8.263186695	8.34925475	0.650659672	3.70627E-05	0.000484817	1.020756507	1.11618E-06	2.07855E-05	0.199060989	0.079244737	0.193270345	0.569157823	0.000241466	0.001712326	1.219817496	8.13918E-07	1.42585E-05	-0.451598683	0.00024754	0.001146657
ENSMUSG00000026342	Slc35f5	74150	solute carrier family 35, member F5 [Source:MGI Symbol;Acc:MGI:1921400]	5.008029932	4.952015786	4.755121695	6.014164101	6.575622913	6.58970617	5.218357815	5.071720922	5.284204341	6.790854729	6.667264279	6.60440653	1.507119568	1.94162E-07	9.215E-06	1.554069214	3.88134E-07	9.56339E-06	-0.276624566	0.072145366	0.181270288	-0.22967492	0.14358092	0.251117479	1.277444648	9.97923E-06	8.91965E-05	-1.783744135	8.76683E-09	5.437E-07
ENSMUSG00000036155	Mgat5	107895	mannoside acetylglucosaminyltransferase 5 [Source:MGI Symbol;Acc:MGI:894701]	7.387028387	7.571423748	7.397393827	7.593675848	7.603555192	7.674102349	7.420945243	7.450633497	7.358843333	7.80097889	7.774974231	7.733150623	0.363176366	0.003392232	0.014420102	0.154295271	0.173233893	0.252604728	0.06258381	0.553958198	0.703667523	-0.146297284	0.196248258	0.318714145	0.216879081	0.104581374	0.163406191	-0.300592556	0.004546949	0.012114498
ENSMUSG00000104378	Gm37510		predicted gene, 37510 [Source:MGI Symbol;Acc:MGI:5610738]	0.143297932	0.015311772	0.619936656	0.415075938	-0.265725191	-1.145055915	0.616568579	0.173372682	1.156850657	1.04024488	0.156070265	0.54189585	-0.105232049	0.804118507	0.868040586	-0.771834237	0.137183463	0.209769143	-0.362701483	0.423887341	0.594032375	-1.029303671	0.056429047	0.122371577	-1.13453572	0.05843922	0.101025093	-0.257469434	0.50907069	0.597954682
ENSMUSG00000099471	Gm8451		predicted gene 8451 [Source:MGI Symbol;Acc:MGI:3644810]	4.089578524	3.816108051	3.98229656	4.098836972	4.206573814	4.135845242	3.112889139	3.114882487	3.103820459	3.267753729	3.400558456	3.347793596	0.233716051	0.069994675	0.145539707	0.197270027	0.163855853	0.241772226	0.848029319	2.58776E-05	0.000606224	0.811583294	7.44951E-05	0.000695488	1.045299345	2.27311E-05	0.00016779	0.614313267	0.000105706	0.000596938
ENSMUSG00000026349	Ccnt2		cyclin T2 [Source:MGI Symbol;Acc:MGI:1920199]	6.975892824	6.998488091	7.091288296	7.101732521	6.961740225	6.985322872	7.140305361	7.133542551	7.225219326	6.953907397	7.009879813	7.072904174	-0.162201854	0.10200599	0.194473121	-0.02043856	0.839920933	0.878099157	-0.151344417	0.141218313	0.286523022	-0.009581124	0.924768351	0.952750069	-0.171782977	0.160780919	0.232905998	0.010857437	0.893065734	0.923375199
ENSMUSG00000051590	Map3k19	22625	mitogen-activated protein kinase kinase kinase 19 [Source:MGI Symbol;Acc:MGI:1203481]	2.627554544	2.373821065	2.154839233	0.208066867	0.357242858	1.518806615	0.920789792	0.989567101	0.9265231	1.057489141	1.583906287	1.563525155	0.460271416	0.139307743	0.245682114	-1.571800122	0.000640765	0.00269661	1.429573339	0.000669657	0.006268787	-0.602498199	0.098641129	0.188205269	-0.142226783	0.710605412	0.772722989	0.969301923	0.003515686	0.00981358
ENSMUSG00000036104	Rab3gap1	226407	RAB3 GTPase activating protein subunit 1 [Source:MGI Symbol;Acc:MGI:2445001]	6.003198304	6.181463524	6.161331884	5.892976078	6.214004538	6.192531909	6.258139871	6.271798654	6.326357102	6.051581137	6.273315006	6.279999446	-0.087671396	0.45031788	0.580101631	0.012027235	0.9237275	0.942728653	-0.16488554	0.189531058	0.34864479	-0.065186908	0.606631491	0.722569208	-0.152858304	0.30233097	0.39004289	-0.077214144	0.4467858	0.538126264
ENSMUSG00000036086	Zranb3	226409	zinc finger, RAN-binding domain containing 3 [Source:MGI Symbol;Acc:MGI:1918362]	2.183745812	1.099723488	1.766309739	0.722201837	1.295902384	1.498402957	1.328597414	1.425613378	1.190795272	1.261653473	1.273996638	1.506464665	0.015117161	0.958195454	0.972831342	-0.451328411	0.194295448	0.277091917	0.39122056	0.215941365	0.381176294	-0.075225012	0.822161577	0.885915612	-0.060107851	0.872198724	0.904222737	0.376103398	0.170100684	0.244065141
ENSMUSG00000058603	Rpl28-ps1		ribosomal protein L28, pseudogene 1 [Source:MGI Symbol;Acc:MGI:3705349]	4.523505158	4.14223024	4.324606214	4.54130272	4.635263342	4.553093309	3.609564389	3.544505622	3.622914229	3.732896989	3.604598445	3.615118067	0.06035662	0.63358684	0.738281193	0.260438748	0.088755657	0.146645289	0.734262323	0.000148742	0.002126658	0.934344451	3.42856E-05	0.000390087	0.994701071	5.78197E-05	0.000352759	0.673905703	7.58287E-05	0.000456418
ENSMUSG00000056211	R3hdm1	226412	R3H domain containing 1 [Source:MGI Symbol;Acc:MGI:2448514]	5.654888447	5.662263165	5.868157344	5.736770557	5.672324324	5.579374376	5.880833232	5.925675146	5.893149645	5.659907016	5.543750263	5.744990421	-0.268389915	0.024216696	0.06503351	-0.072261796	0.538014072	0.624871791	-0.179598398	0.125640931	0.263800644	0.016529721	0.88711983	0.928398151	-0.251860194	0.079107115	0.129946322	0.088791517	0.347109206	0.437254361
ENSMUSG00000026353	Ubxn4	67812	UBX domain protein 4 [Source:MGI Symbol;Acc:MGI:1915062]	5.981718567	5.745746671	5.939562969	6.532525882	6.43614374	6.468913461	6.007787257	5.922567751	6.146309964	6.229951064	6.159362231	6.270167213	0.185631095	0.104116342	0.197323906	0.597428953	0.000298452	0.001451207	-0.156001838	0.185026549	0.34340532	0.25579602	0.048388256	0.108420912	0.441427115	0.006619438	0.016529353	-0.341632933	0.003343238	0.009421006
ENSMUSG00000026355	Mcm6	17219	minichromosome maintenance complex component 6 [Source:MGI Symbol;Acc:MGI:1298227]	4.841688845	4.754264765	4.436904735	3.445252495	3.998624972	4.080849743	3.597432284	3.591518047	3.463903103	3.301042376	3.461643938	3.157572459	-0.214627612	0.215259908	0.338585897	-0.762954126	0.001695219	0.005932366	1.13025282	4.0733E-05	0.000821281	0.581926307	0.009408444	0.029692637	0.367298695	0.10676555	0.166313862	1.344880432	1.69571E-06	2.60584E-05
ENSMUSG00000026356	Dars	226414	aspartyl-tRNA synthetase [Source:MGI Symbol;Acc:MGI:2442544]	5.19504284	5.137695948	5.267595786	5.048793016	5.409312638	5.087558653	5.073370762	5.126652664	4.935555095	5.346862196	5.043960004	5.186058467	0.138270196	0.292958841	0.425665121	0.014491591	0.919387851	0.939473044	0.155207047	0.264850569	0.435266072	0.031428442	0.826510441	0.888415587	0.169698638	0.309619126	0.397342161	0.016936851	0.881438865	0.914552895
ENSMUSG00000100078	Gm6170		predicted gene 6170 [Source:MGI Symbol;Acc:MGI:3643368]	8.002356545	8.011685752	8.099803018	8.328179541	8.347572336	8.359131867	7.214128884	7.263842176	7.191107863	7.538092298	7.477399712	7.601414865	0.30535735	0.006889986	0.025014673	0.312396108	0.009616504	0.023902751	0.809116123	4.25329E-06	0.000171763	0.816154881	5.54977E-06	0.000105613	1.121512231	1.00371E-06	1.63849E-05	0.503758773	5.75302E-05	0.00036813
ENSMUSG00000045382	Cxcr4	12767	chemokine (C-X-C motif) receptor 4 [Source:MGI Symbol;Acc:MGI:109563]	2.899851098	3.080717796	2.504865486	4.408133634	4.772715313	4.885514443	-0.542066444	-0.702448993	-0.500106088	-0.720757864	-0.66816589	-1.070373029	-0.199538386	0.442360533	0.572536057	1.933442266	3.66489E-05	0.00028082	3.397606236	5.7328E-08	7.17478E-06	5.530586888	9.6002E-10	4.94832E-07	5.331048502	4.45101E-09	3.3066E-07	3.597144623	6.77884E-09	4.48173E-07
ENSMUSG00000089648	Gm15790		predicted pseudogene 15790 [Source:MGI Symbol;Acc:MGI:3783232]	1.184396551	0.299570506	0.434754131	1.779928708	1.431767905	1.595321073	1.047421609	0.849170551	1.147385374	1.178223886	1.640442052	1.031183057	0.328933309	0.293463095	0.426174924	0.926074513	0.021651362	0.046281076	-0.355381234	0.282925316	0.455909812	0.241759971	0.500458241	0.63324218	0.57069328	0.168027609	0.241240135	-0.684314543	0.028450182	0.054679559
ENSMUSG00000094122	Rpl31-ps9		ribosomal protein L31, pseudogene 9 [Source:MGI Symbol;Acc:MGI:3704195]	3.66031662	3.28604106	3.267992401	3.54863437	3.594681732	3.57322875	2.476285882	2.434327682	2.379241989	2.75783595	2.677459249	2.479636843	0.228459377	0.159559618	0.2706474	0.177867589	0.324480427	0.419124323	0.976011574	7.6832E-05	0.001309632	0.925419787	0.000230808	0.001652299	1.153879163	9.81673E-05	0.000536272	0.747552197	0.000188093	0.000928568
ENSMUSG00000101904	Gm29427		predicted gene 29427 [Source:MGI Symbol;Acc:MGI:5580133]	1.704373657	1.616470312	1.780836852	0.510740721	0.613999628	0.758042565	1.495525391	1.727941696	1.298583443	0.891614193	1.177887785	1.265965046	-0.40441766	0.075268966	0.154081007	-1.053901372	0.001043521	0.004000163	0.192040233	0.396238791	0.568710537	-0.457443479	0.082182566	0.163283782	-0.861861139	0.008024272	0.019369799	0.596457893	0.00869962	0.020546604
ENSMUSG00000026409	Pfkfb2	18640	6-phosphofructo-2-kinase/fructose-2,6-biphosphatase 2 [Source:MGI Symbol;Acc:MGI:107815]	3.440071689	3.663123004	3.654586723	2.799392332	3.083617635	2.877105307	3.638547209	3.646263858	3.598771556	3.316253838	2.837790173	3.112486455	-0.56238259	0.005249804	0.020235926	-0.649095106	0.004774669	0.013509106	-0.03648037	0.834971193	0.905780088	-0.123192886	0.518133933	0.648270842	-0.685575476	0.007111883	0.017532968	0.52590222	0.004057154	0.011057873
ENSMUSG00000046404	Yod1		YOD1 deubiquitinase [Source:MGI Symbol;Acc:MGI:2442596]	4.843599445	5.068285858	4.90684849	4.618448234	4.984417869	4.67850149	5.021211858	4.907905747	5.125964541	4.977383909	5.091244916	4.914283597	-0.008210799	0.946526328	0.965145607	-0.157932982	0.263900889	0.354556204	-0.067249922	0.604837381	0.743245668	-0.216972104	0.13436927	0.238672536	-0.225182904	0.167764935	0.240887905	-0.059039123	0.589679328	0.671736386
ENSMUSG00000042510	AA986860	212439	expressed sequence AA986860 [Source:MGI Symbol;Acc:MGI:2138143]	0.12977901	1.106588308	0.584163257	-0.39463364	-0.024111477	-0.490691909	0.951535306	0.976078747	0.954758007	0.850612388	1.000814273	0.850618635	-0.048183461	0.869753032	0.914171833	-0.884448555	0.022646024	0.047942482	-0.381499293	0.233790499	0.401211236	-1.217764388	0.003912895	0.014917108	-1.265947848	0.005958098	0.015141716	-0.333315832	0.228879551	0.311175839
ENSMUSG00000016528	Mapkapk2	17164	MAP kinase-activated protein kinase 2 [Source:MGI Symbol;Acc:MGI:109298]	7.125571256	7.161411843	7.401359507	9.459434998	9.078513499	9.226651947	6.991249498	7.16461217	6.928081637	7.882099858	7.853894312	8.119953535	0.897125913	3.80578E-05	0.000494163	1.987261444	3.43926E-08	1.80189E-06	0.183073991	0.224954197	0.391219792	1.273209522	3.19796E-06	7.63335E-05	2.170335434	6.28124E-08	2.25372E-06	-0.714051922	8.05118E-05	0.000479208
ENSMUSG00000102856	Gm37084		predicted gene, 37084 [Source:MGI Symbol;Acc:MGI:5610312]	1.654470798	1.310732768	1.304858108	4.598338878	3.014229153	3.584223924	0.877318612	0.53727584	1.342905974	2.739779304	3.125345676	2.73150892	1.981224386	3.35634E-05	0.000451121	2.16897298	5.09721E-05	0.00036396	0.503600935	0.135089281	0.278023746	0.691349529	0.06624045	0.138481917	2.672573915	2.21308E-05	0.000164231	-1.477623451	0.000176498	0.000881346
ENSMUSG00000026427	Eif2d	16865	eukaryotic translation initiation factor 2D [Source:MGI Symbol;Acc:MGI:109342]	4.152120774	3.951843805	3.807948194	3.262973298	3.589627627	3.764254848	3.948243922	3.776093422	4.071389444	4.003410968	3.936723761	3.851247868	0.009923553	0.945436655	0.964488163	-0.378441999	0.038105807	0.07304987	0.04015286	0.793305049	0.879189069	-0.348212692	0.053247667	0.116932751	-0.338289139	0.089311902	0.14356174	0.030229307	0.816088326	0.86363277
ENSMUSG00000026430	Rassf5	54354	Ras association (RalGDS/AF-6) domain family member 5 [Source:MGI Symbol;Acc:MGI:1926375]	7.014238448	7.053652848	6.929873481	6.269194243	6.736708484	6.709563538	7.375591023	7.438418825	7.241150855	7.609212152	7.692056958	7.615885257	0.295611838	0.024671991	0.065988313	-0.377985857	0.010819492	0.026378445	-0.341945675	0.015375156	0.061731697	-1.01554337	5.19832E-06	0.000101711	-0.719931532	0.00037691	0.001564865	-0.637557513	4.65167E-05	0.000314625
ENSMUSG00000042349	Ikbke	56489	inhibitor of kappaB kinase epsilon [Source:MGI Symbol;Acc:MGI:1929612]	1.99140647	2.042219806	2.03643682	7.182079611	4.782614873	5.427541292	-0.073806332	-0.850349224	1.118320824	2.541150468	2.927928761	2.654846054	2.666019917	0.000140362	0.0013319	3.538486594	3.86136E-05	0.000292486	1.957828733	0.002250559	0.015236243	2.830295409	0.000262033	0.001818789	5.496315326	1.85168E-06	2.48777E-05	-0.708191184	0.121691004	0.184014344
ENSMUSG00000026425	Srgap2	14270	SLIT-ROBO Rho GTPase activating protein 2 [Source:MGI Symbol;Acc:MGI:109605]	9.813251821	9.772280874	9.897157753	9.694627733	9.53020359	9.497521218	10.08187796	10.01473873	10.23954035	10.12269862	10.22149347	10.2388625	0.077917685	0.508433812	0.632673103	-0.266522534	0.054641655	0.09844143	-0.296079956	0.030899823	0.100552901	-0.640520174	0.000319916	0.002124411	-0.562602489	0.002365309	0.007037669	-0.37399764	0.003058129	0.008750468
ENSMUSG00000104060	Gm37954		predicted gene, 37954 [Source:MGI Symbol;Acc:MGI:5611182]	0.794801911	-0.815943612	0.445586711	1.269768517	-0.264096649	-0.453258666	0.549519176	-0.24252179	1.663043083	0.000251812	0.859270845	0.430900003	-0.175122596	0.768896511	0.84298874	-0.20553771	0.766687052	0.82087218	-0.456416711	0.472177431	0.634871165	-0.486831825	0.487618405	0.621923878	-0.661954421	0.398951484	0.487872712	-0.281294115	0.605880114	0.687261088
ENSMUSG00000101778	Gm29488		predicted gene 29488 [Source:MGI Symbol;Acc:MGI:5580194]	0.590455753	-0.051124249	-0.299280792	1.440968918	0.314926969	0.569797065	2.181533272	2.097534646	2.075450229	0.325579541	1.107552975	-0.007987822	-1.53935743	0.002306301	0.01076584	0.59064552	0.219996304	0.30632341	-2.031544277	0.000449294	0.004692924	0.098458672	0.83276695	0.892241128	-1.440898757	0.015993387	0.03411857	-0.492186847	0.194046474	0.27204497
ENSMUSG00000055184	Fam72a		family with sequence similarity 72, member A [Source:MGI Symbol;Acc:MGI:1919669]	3.873478882	3.166578517	3.498322962	2.83199027	2.838177892	2.503007836	3.837299008	3.797539424	3.713311227	2.496233432	2.28611806	2.160198157	-1.453881463	1.26081E-05	0.000212306	-0.799020107	0.004149553	0.012042111	-0.270503319	0.215078609	0.379846433	0.384358036	0.111352889	0.206117833	-1.069523426	0.001305967	0.004315888	1.183378143	3.11045E-05	0.000232437
ENSMUSG00000004552	Ctse	13034	cathepsin E [Source:MGI Symbol;Acc:MGI:107361]	4.493357639	4.806208214	4.35632982	4.198591399	4.499340785	5.037484936	1.461411364	1.455017118	1.536453592	0.529803436	1.018592991	0.837472414	-0.673151306	0.009821874	0.032705051	0.099519881	0.694512465	0.760656509	3.062546433	3.66378E-08	5.35043E-06	3.83521762	7.9976E-09	1.73598E-06	3.162066314	2.00625E-07	5.25865E-06	3.735697739	8.34196E-10	9.34569E-08
ENSMUSG00000052688	Rab7b	226421	RAB7B, member RAS oncogene family [Source:MGI Symbol;Acc:MGI:2442295]	3.725475525	3.711977693	2.975621471	2.549694547	2.913629201	3.278170507	0.390921173	1.137922338	-0.985144113	-0.195332077	-1.132824422	-1.293577767	-1.050537564	0.06394777	0.135876785	-0.458151097	0.455766846	0.549969187	3.273181834	8.00769E-05	0.001348397	3.8655683	4.38046E-05	0.000470175	2.815030737	0.001356789	0.004453806	4.323719398	1.51335E-06	2.39719E-05
ENSMUSG00000042251	Pm20d1	212933	peptidase M20 domain containing 1 [Source:MGI Symbol;Acc:MGI:2442939]	-0.231071456	-0.210518925	-0.462267045	-0.164579699	-0.829614963	0.382017904	1.201302708	1.436692843	1.0002782	0.841170928	0.979100192	1.123928392	-0.246550169	0.42763113	0.558315923	0.140461937	0.694273112	0.760454314	-1.528880021	0.000516751	0.005220875	-1.141867916	0.007458616	0.024588301	-1.388418084	0.004364977	0.011706228	-1.282329853	0.000648933	0.002487578
ENSMUSG00000013275	Slc41a1	98396	solute carrier family 41, member 1 [Source:MGI Symbol;Acc:MGI:2444823]	4.655044476	4.954266758	4.890495732	6.775527143	7.042074088	7.133373069	5.192443709	5.248679555	5.177400787	7.088748074	6.877405862	7.134184324	1.805912927	1.6818E-08	1.3515E-06	2.166934881	6.74607E-09	6.33219E-07	-0.359337857	0.019505256	0.07303693	0.001684098	0.990449472	0.994889665	1.807597024	1.87216E-07	5.02556E-06	-2.165250783	6.02153E-10	7.60464E-08
ENSMUSG00000026433	Rab29	226422	RAB29, member RAS oncogene family [Source:MGI Symbol;Acc:MGI:2385107]	3.077914695	3.129468917	3.097762308	2.779579725	3.227174837	3.254771105	3.442675294	3.503509617	3.388027555	3.022488485	3.10714607	3.161816431	-0.351942367	0.018871756	0.053733641	0.038900553	0.794168664	0.842568434	-0.344048535	0.027080992	0.09169616	0.046794385	0.754144031	0.839168395	-0.305147982	0.089976233	0.144386026	0.007893832	0.94643899	0.962020227
ENSMUSG00000026434	Nucks1	98415	nuclear casein kinase and cyclin-dependent kinase substrate 1 [Source:MGI Symbol;Acc:MGI:1934811]	6.046747318	6.134637766	5.950557716	6.322661004	6.289193293	6.344239162	6.160091458	6.216117465	6.056844417	6.338620749	6.547661563	6.337136214	0.279570592	0.023832779	0.064350819	0.261262878	0.047114466	0.087175567	-0.088286752	0.448369894	0.615793827	-0.106594466	0.382205052	0.520395234	0.172976126	0.224914444	0.306174567	-0.367857344	0.00228364	0.006872445
ENSMUSG00000100037	Gm29103		predicted gene 29103 [Source:MGI Symbol;Acc:MGI:5579809]	0.82214566	-0.640596427	0.049994334	1.227454665	0.996288903	1.147589622	0.173668599	0.106215605	0.146122935	0.287334605	0.62408729	0.310249682	0.298656437	0.438107706	0.568431143	1.000168839	0.040705191	0.077303693	-0.026404618	0.947418499	0.972125857	0.675107784	0.147049112	0.255830466	0.973764221	0.068175667	0.114910988	-0.325061055	0.356992516	0.446948453
ENSMUSG00000026435	Slc45a3	212980	solute carrier family 45, member 3 [Source:MGI Symbol;Acc:MGI:1922082]	1.818060041	1.627710164	1.085147705	2.177303217	0.956321503	2.26194434	-0.504788689	-0.519668233	-0.523155243	-0.840031771	-0.263681151	-0.820240903	-0.073741182	0.843599619	0.896723996	0.282307918	0.519562289	0.608888082	2.01215283	0.000282702	0.003331295	2.36820193	0.000169473	0.001309407	2.294460749	0.00051598	0.002014615	2.085894012	6.07948E-05	0.000383012
ENSMUSG00000026436	Elk4	13714	ELK4, member of ETS oncogene family [Source:MGI Symbol;Acc:MGI:102853]	6.260993973	6.486260183	6.607459618	6.896794352	6.703713075	6.716461812	6.448690432	6.484537885	6.530902171	6.935141096	6.821240303	7.06229843	0.427990136	0.004116437	0.016755212	0.28751905	0.048004281	0.088421569	-0.034921576	0.784589073	0.873420353	-0.175392661	0.203197339	0.326412746	0.252597475	0.118546212	0.181450416	-0.462911712	0.000923001	0.003276283
ENSMUSG00000026437	Cdk18	18557	cyclin-dependent kinase 18 [Source:MGI Symbol;Acc:MGI:97518]	3.668911599	3.622940359	3.346876193	2.899418838	2.972050602	2.98732403	1.811593748	1.201044463	2.375483468	2.560954612	1.748659669	1.807275995	0.244541665	0.450894502	0.580467721	-0.579684123	0.133048951	0.204256385	1.762290177	0.000239827	0.002985373	0.938064389	0.023730094	0.061954232	1.182606054	0.01344739	0.029563402	1.517748512	0.000220999	0.001053938
ENSMUSG00000009772	Nuak2	74137	NUAK family, SNF1-like kinase, 2 [Source:MGI Symbol;Acc:MGI:1921387]	5.09961987	5.141680213	5.142382799	6.524177905	7.102870092	6.923536416	5.239778898	5.256664935	5.209658095	6.980058805	7.073414642	7.064446129	1.805762267	3.99934E-09	4.80467E-07	1.785383461	1.22719E-08	9.55065E-07	-0.104809933	0.380638178	0.553989059	-0.12518874	0.319002257	0.456816757	1.680573527	9.74616E-08	3.1125E-06	-1.9105722	5.31354E-10	7.40711E-08
ENSMUSG00000042066	Tmcc2	68875	transmembrane and coiled-coil domains 2 [Source:MGI Symbol;Acc:MGI:1916125]	2.062440849	1.711486691	2.106011291	0.670756446	1.236685985	1.20496463	1.726618928	1.32544335	2.234842587	2.492003185	1.716174037	2.343103156	0.370649446	0.245050494	0.372618374	-0.86828637	0.029712527	0.05973191	0.210589813	0.522941321	0.677930275	-1.028346003	0.013083428	0.038482952	-0.657696557	0.119687802	0.182895496	-0.160059634	0.570070442	0.653741009
ENSMUSG00000042046	Dstyk	213452	dual serine/threonine and tyrosine protein kinase [Source:MGI Symbol;Acc:MGI:1925064]	5.388553394	5.307276079	5.342153695	4.695173642	4.523610584	4.593645222	5.542126598	5.541087373	5.565324162	5.108031448	5.2321119	5.175251673	-0.373973248	0.001341084	0.007218435	-0.755948146	9.28583E-06	9.59812E-05	-0.208112813	0.046103799	0.134036055	-0.590087711	8.74437E-05	0.00079293	-0.964060959	3.14924E-06	3.67332E-05	0.165860435	0.056242624	0.097179419
ENSMUSG00000026439	Rbbp5	213464	retinoblastoma binding protein 5, histone lysine methyltransferase complex subunit [Source:MGI Symbol;Acc:MGI:1918367]	5.585886506	5.576923272	5.683840691	5.469265754	5.598751293	5.612368729	5.968485581	6.086597804	5.846096778	5.482438304	5.363248464	5.54428776	-0.51866355	0.000335599	0.002533771	-0.037348031	0.745703254	0.803545579	-0.35628299	0.00667135	0.033787236	0.125032529	0.289632197	0.42536954	-0.393631021	0.010764888	0.024669388	0.16238056	0.096239174	0.151376201
ENSMUSG00000048174	Tmem81	74626	transmembrane protein 81 [Source:MGI Symbol;Acc:MGI:1921876]	3.110910162	2.621202804	2.593163297	2.289016486	2.624627264	2.66299204	2.996277032	2.906011912	2.990624545	2.4421192	2.760792147	2.395259253	-0.395726566	0.062069296	0.132738095	-0.200444363	0.376184108	0.470975994	-0.190078634	0.365037786	0.539594055	0.005203569	0.981349112	0.988679517	-0.390522997	0.139006849	0.207331238	0.205647932	0.255393651	0.340459514
ENSMUSG00000053024	Cntn2	21367	contactin 2 [Source:MGI Symbol;Acc:MGI:104518]	-1.105155648	-0.549792864	-1.65701248	0.896710729	1.306529902	2.74517932	-0.876887838	-1.479779622	-0.097123305	1.950358209	2.292044452	2.093292069	2.957189564	5.26801E-05	0.000621777	2.975048551	0.000182153	0.000985768	-0.319289901	0.527285741	0.681273578	-0.301430914	0.58853185	0.707072945	2.65575865	0.001042958	0.00358101	-3.276479465	8.81847E-06	9.04772E-05
ENSMUSG00000026442	Nfasc	269116	neurofascin [Source:MGI Symbol;Acc:MGI:104753]	-1.430092684	-1.524064988	-2.357847297	0.510245564	0.323262802	2.063989504	-0.90521916	-1.545974512	-0.152721423	1.861980153	2.000626294	1.795271033	2.781718015	0.000117035	0.001160496	2.8967724	0.000288625	0.001410331	-0.916713524	0.096451911	0.220779361	-0.801659138	0.17813997	0.296551283	1.980058877	0.008584052	0.020484352	-3.698431538	3.70217E-06	4.65945E-05
ENSMUSG00000026443	Lrrn2	16980	leucine rich repeat protein 2, neuronal [Source:MGI Symbol;Acc:MGI:106037]	-5.614186472	-0.552966254	-2.825139624	0.941272899	0.550730928	0.742587436	-2.626792618	-1.715453145	-3.361714215	0.318315985	-1.361935684	0.074955057	2.089387683	0.09665109	0.186883228	3.760584446	0.016300487	0.036790492	-0.50557069	0.684882311	0.803308432	1.165626072	0.399872818	0.538487126	3.255013756	0.051037082	0.090101301	-2.594958374	0.030150806	0.0574648
ENSMUSG00000054387	Mdm4	17248	transformed mouse 3T3 cell double minute 4 [Source:MGI Symbol;Acc:MGI:107934]	8.036931517	7.931000739	8.184794794	8.165916354	7.950302266	8.025944957	7.981785249	7.959298304	8.161160332	7.580301034	7.710283366	7.852181431	-0.336608586	0.020461979	0.057091346	-0.011795117	0.931881671	0.949028676	-0.010329109	0.938361007	0.967902518	0.314484359	0.040411996	0.094179407	-0.022124227	0.889875976	0.917754793	0.326279476	0.011515236	0.02584813
ENSMUSG00000100228	Gm29257		predicted gene 29257 [Source:MGI Symbol;Acc:MGI:5579963]	1.247526088	0.535063846	1.10639642	1.541358984	1.633017873	1.426429064	0.214380011	0.138226765	0.303193726	0.198883453	0.224519512	0.286965943	0.015226009	0.954444326	0.970583455	0.537113768	0.103948555	0.166749807	0.7705926	0.017148121	0.066616804	1.292480359	0.001359032	0.006492321	1.307706368	0.002620902	0.007677329	0.755366591	0.008737186	0.020626916
ENSMUSG00000026447	Pik3c2b	240752	phosphatidylinositol-4-phosphate 3-kinase catalytic subunit type 2 beta [Source:MGI Symbol;Acc:MGI:2685045]	3.407442819	3.367689864	3.097650902	2.576963361	2.344633749	2.655611113	3.035778634	3.093514271	2.922087719	2.913022585	3.301460269	2.939806179	0.065240779	0.706435002	0.797415702	-0.770274791	0.002052003	0.006927441	0.272164636	0.154736541	0.304562203	-0.563350934	0.013716406	0.039972375	-0.498110155	0.042059272	0.076700387	0.206923857	0.199441701	0.278299037
ENSMUSG00000046062	Ppp1r15b	108954	protein phosphatase 1, regulatory subunit 15B [Source:MGI Symbol;Acc:MGI:2444211]	7.376396683	7.532897098	7.530270145	9.439062362	9.197343234	9.28966821	7.488100513	7.551855602	7.43947679	9.053247979	8.8443219	9.005912321	1.461100702	5.36161E-08	3.32515E-06	1.789195462	1.50611E-08	1.11289E-06	-0.004981976	0.967200644	0.982261229	0.323112785	0.02347274	0.061397724	1.784213486	7.11888E-08	2.46622E-06	-1.466082678	1.15708E-08	6.42965E-07
ENSMUSG00000070643	Sox13	20668	SRY (sex determining region Y)-box 13 [Source:MGI Symbol;Acc:MGI:98361]	2.002356147	3.144341556	2.344030268	3.014994262	2.461270979	3.313345669	2.743571821	2.710199874	2.85429416	3.984262082	3.274578985	3.706786814	0.844435668	0.023762154	0.064222538	0.407602023	0.289909515	0.382580315	-0.262364272	0.456490229	0.622578853	-0.699197917	0.083273677	0.164885679	0.145237751	0.731967458	0.790829983	-1.10679994	0.002815224	0.008156223
ENSMUSG00000090553	Snrpe	20643	small nuclear ribonucleoprotein E [Source:MGI Symbol;Acc:MGI:98346]	2.837085832	3.050072256	2.862116512	2.652836651	3.144176777	2.974010522	1.999921535	2.570118409	1.201973971	2.367150255	2.456936871	2.352004924	0.473919478	0.113735707	0.210950127	0.052848532	0.869796246	0.90117519	0.990323375	0.005928852	0.030882495	0.569252429	0.098432809	0.187936859	1.043171908	0.013405577	0.029485478	0.516403897	0.061724239	0.104941026
ENSMUSG00000102976	Zc3h11a	70579	zinc finger CCCH type containing 11A [Source:MGI Symbol;Acc:MGI:1917829]	5.817169994	5.908957057	6.097027121	6.450279206	6.158842237	6.146258526	6.005590379	5.950105576	6.236256962	5.953139102	6.083738964	6.196954148	-0.001232704	0.992334426	0.995280456	0.275478733	0.071076039	0.122398454	-0.132401431	0.337771086	0.512933529	0.144310007	0.318359939	0.456194191	0.143077303	0.385696188	0.474755577	-0.131168727	0.257431243	0.342813922
ENSMUSG00000116275	Zc3h11a	70579	zinc finger CCCH type containing 11A [Source:MGI Symbol;Acc:MGI:1917829]	5.290892187	5.251440689	5.398964461	5.998977652	5.660408805	5.724870746	5.475754304	5.411823784	5.642670292	5.519808187	5.532579389	5.625902364	0.039069907	0.716264404	0.804263264	0.446925165	0.002749772	0.008741379	-0.204739976	0.090915826	0.212054186	0.203115282	0.108972248	0.203009584	0.242185189	0.095732169	0.15200943	-0.243809883	0.023116414	0.045987859
ENSMUSG00000094410	Gm38394		predicted gene, 38394 [Source:MGI Symbol;Acc:MGI:5614057]	6.150060631	6.208754624	6.39623144	6.813568973	6.495826445	6.4744193	6.445978709	6.427033713	6.606263814	6.300452682	6.390844747	6.496268307	-0.111206102	0.354047973	0.49007916	0.306614847	0.032826029	0.064733987	-0.252307083	0.060990357	0.162582843	0.165513866	0.215462572	0.341028375	0.054307763	0.714690587	0.776329786	-0.141100981	0.186796332	0.263682995
ENSMUSG00000026463	Atp2b4	381290	ATPase, Ca++ transporting, plasma membrane 4 [Source:MGI Symbol;Acc:MGI:88111]	-2.845611384	0.558429447	-1.352489891	0.728689554	-0.24595816	-0.161681861	-1.405878629	-1.145157391	-1.29981607	-0.521982449	0.995132698	0.303903119	1.596199658	0.06797397	0.142578046	1.278997651	0.189133167	0.271317426	-0.014396823	0.986497162	0.993289743	-0.33159883	0.724296963	0.815457769	1.264600827	0.241444382	0.324259992	-1.610596481	0.046173343	0.082214827
ENSMUSG00000020423	Btg2		BTG anti-proliferation factor 2 [Source:MGI Symbol;Acc:MGI:108384]	6.913434839	6.931060756	6.755217467	8.246399198	8.532811845	8.738806197	7.484767429	7.527208736	7.389272311	10.42861672	10.45203483	10.42219396	2.97154432	3.99164E-11	1.73287E-08	1.668196312	4.44402E-08	2.19702E-06	-0.589834821	0.000538394	0.005348463	-1.893182829	1.23775E-08	2.32363E-06	1.078361491	1.43181E-05	0.000118037	-3.561379141	1.17888E-12	1.0918E-09
ENSMUSG00000042451	Mybph	53311	myosin binding protein H [Source:MGI Symbol;Acc:MGI:1858196]	1.635690104	1.676002685	1.749689121	-0.143742202	-0.353131417	-0.285353671	0.733321719	0.3920564	1.30912696	-0.979253558	-0.38732848	-0.537563761	-1.426571644	0.000744158	0.004602956	-1.967925446	0.000192702	0.001027251	0.876910268	0.020966317	0.076972536	0.335556466	0.371643108	0.509761656	-1.091015178	0.019882292	0.040925293	2.303481912	5.27652E-06	6.13401E-05
ENSMUSG00000042429	Adora1	11539	adenosine A1 receptor [Source:MGI Symbol;Acc:MGI:99401]	3.766248104	3.710907359	3.846651635	1.713882169	2.527599788	2.820455521	0.54133726	0.966756905	0.010987712	1.890881527	1.290306945	1.948803161	1.144861149	0.002670812	0.012058147	-1.307442502	0.002719172	0.008659957	3.264884505	4.96304E-07	3.57236E-05	0.812580854	0.035948946	0.085852288	1.957442003	0.000332596	0.001410384	2.120023356	7.23674E-06	7.82356E-05
ENSMUSG00000026458	Ppfia4	68507	protein tyrosine phosphatase, receptor type, f polypeptide (PTPRF), interacting protein (liprin), alpha 4 [Source:MGI Symbol;Acc:MGI:1915757]	8.819991385	8.773058931	8.624324376	6.534553788	7.28270805	7.137196637	8.070700722	7.955199562	8.092205105	7.496718753	7.451469398	7.360828364	-0.589356326	0.001471595	0.007729827	-1.666615282	2.91652E-07	7.7916E-06	0.711388526	0.000520899	0.005243713	-0.365870429	0.035289482	0.08455355	-0.955226755	0.000206547	0.000961256	1.300744852	3.70733E-07	7.91126E-06
ENSMUSG00000042305	Tmem183a	57439	transmembrane protein 183A [Source:MGI Symbol;Acc:MGI:1914729]	4.929723292	5.193153217	5.298389397	5.357564525	5.213018928	5.020006936	5.050212372	4.982039877	5.28758678	5.063185902	5.322528563	5.330873592	0.12653324	0.394176755	0.528970583	0.02297013	0.888085456	0.915636274	0.034513828	0.822901472	0.898369135	-0.069049281	0.67357647	0.776977251	0.057483958	0.757483186	0.81164338	-0.092019412	0.481998505	0.572741701
ENSMUSG00000026456	Cyb5r1	72017	cytochrome b5 reductase 1 [Source:MGI Symbol;Acc:MGI:1919267]	5.316850111	5.255422315	5.075230165	4.289502361	4.633852816	4.290188467	4.831666805	4.871284041	4.571792512	4.391842879	4.239799155	3.987188612	-0.526391123	0.004566063	0.018185709	-0.7861585	0.000643707	0.00270653	0.466913567	0.01245514	0.053189917	0.207146189	0.241099415	0.371448716	-0.319244934	0.11999623	0.183306315	0.993304689	1.18263E-05	0.000111535
ENSMUSG00000026457	Adipor1	72674	adiponectin receptor 1 [Source:MGI Symbol;Acc:MGI:1919924]	7.497534357	7.544649979	7.459687971	6.712379324	7.191477801	7.032268653	7.381258921	7.349072322	7.355859937	6.948528122	6.933764649	6.881918715	-0.433290719	0.001595657	0.008197808	-0.471430638	0.00157785	0.005598847	0.149382046	0.199378114	0.361456396	0.111242127	0.348501071	0.487011053	-0.322048593	0.031654952	0.060530019	0.582672765	4.78761E-05	0.000321474
ENSMUSG00000026455	Klhl12	240756	kelch-like 12 [Source:MGI Symbol;Acc:MGI:2385619]	1.369410345	1.785666443	1.968989629	2.495558879	2.331722963	1.732117627	2.207161596	1.884300485	2.74966222	2.670390157	2.644357285	2.771798985	0.403329467	0.141302593	0.248142585	0.410628179	0.186843333	0.268587292	-0.568205087	0.058301636	0.157481299	-0.560906375	0.080903294	0.161249434	-0.157576908	0.640085262	0.712905032	-0.971534554	0.00141508	0.004637484
ENSMUSG00000042229	Rabif		RAB interacting factor [Source:MGI Symbol;Acc:MGI:2138605]	3.892709573	3.793577694	3.832232178	3.336066324	4.106014905	3.741948626	4.413000293	4.292665004	4.458512773	4.23544903	3.954537839	4.025551322	-0.317845499	0.056882431	0.12411037	-0.039514299	0.819664587	0.862177666	-0.54407983	0.005428855	0.028906728	-0.26574863	0.145064535	0.253218637	-0.58359413	0.011049216	0.025159107	-0.226234331	0.118764473	0.18029462
ENSMUSG00000096712	Gm15454		predicted gene 15454 [Source:MGI Symbol;Acc:MGI:3644262]	2.179828818	1.960587737	2.145415229	2.377321335	2.476776859	2.132472354	1.269504146	1.389887575	1.09995744	1.310511361	1.637965259	1.410423562	0.220100534	0.259408379	0.38845482	0.213378006	0.339076033	0.433742564	0.845823938	0.001211532	0.009617489	0.83910141	0.002361164	0.01006792	1.059201944	0.001014568	0.003499969	0.625723404	0.003330202	0.009393536
ENSMUSG00000042207	Kdm5b	75605	lysine (K)-specific demethylase 5B [Source:MGI Symbol;Acc:MGI:1922855]	4.811450823	5.083484646	4.908729085	4.2728738	4.068126211	4.147424976	5.664037455	5.757642644	5.522036437	5.07002416	4.84943674	4.911744053	-0.710170664	9.67677E-05	0.001007569	-0.802425727	9.0418E-05	0.000565295	-0.702808331	0.000166218	0.002293346	-0.795063395	9.85854E-05	0.000866281	-1.505234058	8.29522E-07	1.43687E-05	0.007362333	0.945920573	0.961633999
ENSMUSG00000026452	Syt2	20980	synaptotagmin II [Source:MGI Symbol;Acc:MGI:99666]	-1.094775061	-2.107893884	-2.208955604	-1.233986062	0.072065825	1.633248872	-1.824095492	-1.773145899	-1.929331468	1.497242849	1.856766483	1.964882754	3.613535901	2.39071E-05	0.000348496	2.248558594	0.003289686	0.010035203	0.041302678	0.941185269	0.969663731	-1.323674629	0.050720407	0.112593348	2.289861272	0.005878209	0.014967024	-3.572233223	1.10724E-05	0.000106448
ENSMUSG00000073557	Ppp1r12b	329251	protein phosphatase 1, regulatory subunit 12B [Source:MGI Symbol;Acc:MGI:1916417]	3.842330473	3.9705788	4.188840458	3.434347054	3.303168871	3.451768249	4.38560911	4.287067692	4.695381038	3.580902218	3.527987951	3.894345768	-0.821869808	0.000321494	0.002455299	-0.614828919	0.005990611	0.016222528	-0.459834659	0.019660461	0.07345998	-0.25279377	0.190862862	0.312236701	-1.074663578	0.00027262	0.001205361	0.362035149	0.027953369	0.053934473
ENSMUSG00000031506	Ptpn7	320139	protein tyrosine phosphatase, non-receptor type 7 [Source:MGI Symbol;Acc:MGI:2156893]	1.410345299	1.779467932	1.3750322	1.008520717	1.561413261	1.233115427	-1.714170883	-2.335866928	-1.025313148	-0.17604767	-0.361756894	-0.53483569	1.355844943	0.003161928	0.013709583	-0.204437586	0.635099002	0.710141286	3.210159934	3.91607E-06	0.000163369	1.649877404	0.002369036	0.010092195	3.005722348	4.91191E-05	0.000310872	1.854314991	0.000149811	0.000774618
ENSMUSG00000026426	Arl8a	68724	ADP-ribosylation factor-like 8A [Source:MGI Symbol;Acc:MGI:1915974]	6.328827144	6.324473735	6.409807118	6.02968162	6.420533191	6.25669066	6.625830055	6.633685372	6.617064616	6.114903634	6.067071536	6.156318293	-0.518646687	0.00021608	0.001834832	-0.071768148	0.508881381	0.599100012	-0.274068653	0.020184688	0.074814751	0.172809886	0.129085514	0.231208865	-0.345836801	0.01557292	0.0333702	0.244578034	0.013981966	0.030297531
ENSMUSG00000085311	Gm15445		predicted gene 15445 [Source:MGI Symbol;Acc:MGI:3707341]	0.830443795	0.954530072	0.357154707	0.240778501	-0.320160299	0.594341728	0.4988245	0.512662092	0.397742446	0.510345262	0.499882757	0.273770694	-0.02229073	0.940335412	0.961302491	-0.50273485	0.165556045	0.243735291	0.226978585	0.475109632	0.637517919	-0.253465535	0.470953382	0.606122325	-0.275756265	0.480637255	0.566560713	0.249269315	0.367440404	0.458006468
ENSMUSG00000026424	Gpr37l1	171469	G protein-coupled receptor 37-like 1 [Source:MGI Symbol;Acc:MGI:1928503]	-3.689901857	-0.412612916	-2.680375524	-0.364138629	0.920284991	1.406116714	0.494479568	-0.210929333	1.525665185	1.659215278	1.003774392	1.428768511	0.723570008	0.369721995	0.505479574	3.199030888	0.004467986	0.012795148	-2.950427517	0.004047906	0.023401375	-0.474966637	0.608600019	0.724462359	0.248603372	0.808833447	0.855211253	-3.673997525	0.000287465	0.001284074
ENSMUSG00000079139	Gm4204		predicted gene 4204 [Source:MGI Symbol;Acc:MGI:3782381]	3.042537471	2.907140996	2.777847357	3.305762801	3.309757376	3.535898399	2.18365679	2.34184476	1.899394892	2.76950179	2.72567434	2.642395911	0.578352033	0.003261349	0.014009481	0.493023602	0.017374064	0.038754095	0.766427016	0.000654635	0.006165552	0.681098585	0.002658302	0.011053316	1.259450618	5.51856E-05	0.000339822	0.188074983	0.20320878	0.282693408
ENSMUSG00000041926	Rnpep	215615	arginyl aminopeptidase (aminopeptidase B) [Source:MGI Symbol;Acc:MGI:2384902]	7.102339589	6.904130082	6.957719634	6.295452159	6.541282091	6.351003579	6.768115032	6.655482778	6.843159799	5.83582386	5.854357377	5.760892964	-0.927830571	1.97542E-06	5.44496E-05	-0.551794716	0.000450218	0.002035284	0.223884619	0.061905979	0.16437268	0.599920474	0.000234879	0.001674163	-0.327910097	0.027380111	0.053595112	1.15171519	5.54279E-08	1.87806E-06
ENSMUSG00000062580	Timm17a		translocase of inner mitochondrial membrane 17a [Source:MGI Symbol;Acc:MGI:1343131]	3.725059176	3.81239104	3.746155004	4.378060052	4.178172471	4.173012289	3.827433765	4.151770837	3.386106198	4.454234198	4.498623426	4.419543509	0.673276126	0.00175891	0.008798983	0.456375786	0.031928607	0.063319373	-0.027025034	0.878882452	0.931808751	-0.243925374	0.216510368	0.342196484	0.429350752	0.065779818	0.111549467	-0.70030116	0.000582963	0.002274864
ENSMUSG00000041879	Ipo9	226432	importin 9 [Source:MGI Symbol;Acc:MGI:1918944]	7.053940118	7.013433029	7.112962288	7.43216965	7.566047036	7.481712795	7.309295135	7.298395029	7.354264494	7.744140241	7.787642857	7.828831793	0.46223532	0.00030741	0.002369888	0.455339429	0.000656212	0.002752444	-0.269088251	0.015283612	0.061451812	-0.275984142	0.016219188	0.045619956	0.186251178	0.125109552	0.18996851	-0.731323571	1.31716E-06	2.1527E-05
ENSMUSG00000009418	Nav1	215690	neuron navigator 1 [Source:MGI Symbol;Acc:MGI:2183683]	4.700968275	5.429289672	5.078208493	4.568146549	3.873141528	3.700285757	4.410619744	4.349974169	4.518583711	4.706893275	4.702142736	4.526494025	0.22911129	0.279912284	0.41083375	-1.135361413	0.000398174	0.001837075	0.664990061	0.009639385	0.04423863	-0.699482642	0.010436476	0.032240054	-0.470371352	0.094709686	0.150693729	0.435878771	0.033509905	0.062933567
ENSMUSG00000026421	Csrp1	13007	cysteine and glycine-rich protein 1 [Source:MGI Symbol;Acc:MGI:88549]	3.003700188	3.214892836	2.95165399	4.118243082	4.27688653	4.49329178	2.218262163	2.24981004	2.18009679	3.127801508	3.236926759	3.170082623	0.967747192	1.53683E-05	0.000246816	1.269711845	4.00435E-06	5.19406E-05	0.841790838	8.67585E-05	0.001421561	1.143755492	1.09377E-05	0.000166081	2.111502684	8.20487E-08	2.75214E-06	-0.125956354	0.312362046	0.401641387
ENSMUSG00000041801	Phlda3	27280	pleckstrin homology like domain, family A, member 3 [Source:MGI Symbol;Acc:MGI:1351485]	1.598103267	1.761132876	1.63966786	1.286854124	0.943168823	1.886057586	-1.762899385	-1.366549236	-2.229273048	-1.180583033	-2.044104517	-1.310380996	0.201210699	0.629695126	0.735140545	-0.24688479	0.61015513	0.688344573	3.441855864	6.20378E-06	0.000219633	2.993760375	5.50256E-05	0.000554571	3.194971074	8.00472E-05	0.00045762	3.240645165	2.67466E-06	3.65352E-05
ENSMUSG00000026411	Tmem9		transmembrane protein 9 [Source:MGI Symbol;Acc:MGI:1913491]	4.419439488	4.400772656	3.945085859	3.314130766	3.588665328	3.606215679	4.599567774	4.54798391	4.394988029	4.535631481	4.226866485	3.943305352	-0.249333415	0.21261048	0.335596498	-0.717547341	0.006272979	0.016789788	-0.246153558	0.241567673	0.409051452	-0.714367483	0.006477657	0.021991106	-0.963700899	0.002095452	0.006383775	0.003179858	0.985273109	0.989937641
ENSMUSG00000026407	Cacna1s	12292	calcium channel, voltage-dependent, L type, alpha 1S subunit [Source:MGI Symbol;Acc:MGI:88294]	2.392849307	1.65674048	1.904138386	2.149614386	1.697649596	1.5483134	0.30929851	0.093820512	0.270865702	1.456187353	0.256554788	0.397443451	0.464730391	0.231414881	0.357479765	-0.264965495	0.546692696	0.632571625	1.788029724	0.000747701	0.006744847	1.058333838	0.030596646	0.075604519	1.523064229	0.008444045	0.020204042	1.323299333	0.002226019	0.00672843
ENSMUSG00000086264	Gm15850		predicted gene 15850 [Source:MGI Symbol;Acc:MGI:3801986]	1.799753336	0.062793129	0.796380483	-1.667639705	-1.533283629	-1.554904526	0.780277351	0.846107333	0.467178843	0.181606657	0.404831722	-0.007197415	-0.46334199	0.288361187	0.420259505	-2.495203592	0.000309416	0.001496661	0.233155976	0.604998814	0.74325676	-1.798705626	0.00341486	0.013461758	-2.262047616	0.001491338	0.004828169	0.696497966	0.092719897	0.146921958
ENSMUSG00000041642	Kif21b	16565	kinesin family member 21B [Source:MGI Symbol;Acc:MGI:109234]	8.966259079	9.040763421	9.012527566	6.61435964	6.605771971	6.431107353	8.946890898	8.854169676	9.069359947	7.974324862	8.131166709	7.983701314	-0.916953615	3.98623E-06	9.22946E-05	-2.464904208	3.37789E-10	9.63909E-08	0.056186018	0.632254518	0.764807123	-1.491764575	7.13646E-08	6.19199E-06	-2.40871819	2.06611E-09	1.92634E-07	0.973139633	5.41217E-07	1.08493E-05
ENSMUSG00000041570	Camsap2	67886	calmodulin regulated spectrin-associated protein family, member 2 [Source:MGI Symbol;Acc:MGI:1922434]	5.721234386	5.703980004	5.714073765	5.653531881	5.772152362	5.744084694	6.064022367	6.093674268	6.005045694	5.927624515	5.854281609	5.894870083	-0.164067086	0.070004054	0.145539707	0.024665031	0.789570901	0.838974942	-0.341141185	0.002238601	0.015177475	-0.152409068	0.119536632	0.217698333	-0.316476154	0.010847139	0.024812853	-0.177074099	0.031291317	0.059352673
ENSMUSG00000026404	Ddx59	67997	DEAD (Asp-Glu-Ala-Asp) box polypeptide 59 [Source:MGI Symbol;Acc:MGI:1915247]	2.881164181	3.337051271	3.100694904	2.701139944	2.163109984	2.407158916	2.845994415	2.839900447	2.926725676	2.778627523	2.716419475	2.776533196	-0.121998207	0.45833574	0.58803104	-0.734713947	0.001878611	0.006463018	0.236846557	0.185185728	0.343587319	-0.375869182	0.062175987	0.131829793	-0.49786739	0.032689533	0.062193491	0.358844765	0.028731417	0.055091351
ENSMUSG00000041498	Kif14	381293	kinesin family member 14 [Source:MGI Symbol;Acc:MGI:1098226]	1.997495981	2.034835291	1.154823825	0.176323687	0.530916609	1.207436231	-1.905086334	-2.586930888	-1.143277724	-1.530006363	-0.487003096	-1.456256813	0.820280879	0.135332075	0.24029054	-0.963952107	0.130786749	0.201607803	3.594456804	3.39094E-05	0.000729211	1.810223818	0.010915871	0.033408964	2.630504696	0.002130485	0.006466397	2.774175925	9.05638E-05	0.000528128
ENSMUSG00000041483	Zfp281	226442	zinc finger protein 281 [Source:MGI Symbol;Acc:MGI:3029290]	5.359985217	5.386932368	5.320728769	6.663469066	6.364185912	6.457801439	5.444605817	5.513418755	5.327519645	6.072405875	5.99060382	5.967819822	0.583685608	7.5875E-05	0.000824798	1.103537742	4.71773E-07	1.09414E-05	-0.068678717	0.50890277	0.666783279	0.451173417	0.001314315	0.006332428	1.034859025	3.40234E-06	3.90622E-05	-0.652364325	8.57294E-06	8.85467E-05
ENSMUSG00000104118	Gm37298		predicted gene, 37298 [Source:MGI Symbol;Acc:MGI:5610526]	1.295425422	-0.670534975	0.780849332	-3.182946714	-2.42739752	-1.673546514	1.020204122	1.219979585	1.591718017	-5.984548498	-0.579925499	-2.037162571	-3.994169014	0.012383404	0.039071144	-2.783589983	0.099214388	0.160583278	-0.805634428	0.579353143	0.723191362	0.404944603	0.798717151	0.869916007	-3.589224411	0.062274155	0.106422999	3.188534586	0.023550575	0.046677783
ENSMUSG00000103038	Gm37124		predicted gene, 37124 [Source:MGI Symbol;Acc:MGI:5610352]	-0.266655223	-3.538573356	0.17921794	-2.412757048	-1.407298351	-4.537233106	0.728291349	0.610757157	0.946034873	-2.23963521	-2.321346988	-1.670687894	-2.888259305	0.014041738	0.042834394	-1.794526802	0.144677839	0.219011065	-1.88992315	0.097793818	0.222859533	-0.796190647	0.501537381	0.634257886	-3.684449952	0.015021175	0.03237266	0.998336155	0.289912703	0.37802396
ENSMUSG00000102277	A130050O07Rik		RIKEN cDNA A130050O07 gene [Source:MGI Symbol;Acc:MGI:2443458]	-0.484130449	0.151185557	1.066409024	-6.419412415	-2.602026563	-3.009343203	0.929370253	1.202790622	1.403328129	-5.234302238	-3.742034831	-2.480427103	-5.102939823	0.000157092	0.001447592	-3.863553803	0.00358426	0.010747365	-0.948902765	0.343431597	0.518976585	0.290483255	0.787272845	0.861843528	-4.812456568	0.001764234	0.005538696	4.154037058	0.000375897	0.001589638
ENSMUSG00000103427	Gm37534		predicted gene, 37534 [Source:MGI Symbol;Acc:MGI:5610762]	-0.581296842	0.345344164	0.916619559	-1.081068523	-3.974934552	-4.295146707	1.174402477	1.60012792	1.076567769	-0.909957852	-0.885951299	-0.40757266	-2.074842788	0.00529149	0.020360949	-3.720966564	0.000229176	0.001173321	-1.066709743	0.119254686	0.254757203	-2.712833519	0.002480214	0.010479056	-4.787676307	6.98322E-05	0.000412988	1.008133045	0.091005784	0.14475067
ENSMUSG00000026395	Ptprc	19264	protein tyrosine phosphatase, receptor type, C [Source:MGI Symbol;Acc:MGI:97810]	9.08630718	8.947369591	9.055627761	9.387595632	9.324249011	9.271085351	8.59436121	8.533870605	8.685788475	8.62335108	8.672044647	8.659803799	0.047620898	0.646860011	0.749347838	0.303142692	0.01851681	0.04075341	0.410969138	0.002593146	0.016983308	0.666490931	8.37741E-05	0.000767671	0.71411183	0.000155003	0.00076664	0.363348239	0.001636604	0.005226597
ENSMUSG00000104291	A130071D04Rik		RIKEN cDNA A130071D04 gene [Source:MGI Symbol;Acc:MGI:2444749]	0.563956718	1.577611087	0.944972133	2.946523235	1.716033492	1.721548552	1.532782409	1.355836106	1.978942927	1.29107618	2.726948848	1.839486278	0.407009947	0.38372906	0.518758671	0.975757007	0.08645088	0.143434327	-0.618668029	0.218752456	0.384380107	-0.049920969	0.925039038	0.952948745	0.357088978	0.550735327	0.632874114	-1.025677976	0.028495731	0.054737652
ENSMUSG00000026393	Nek7	59125	NIMA (never in mitosis gene a)-related expressed kinase 7 [Source:MGI Symbol;Acc:MGI:1890645]	7.357446661	7.415514885	7.297768676	6.247660916	6.714070822	6.825468688	7.545553532	7.588720154	7.47038401	7.262273544	7.261852573	7.301260895	-0.261007899	0.043250647	0.101390143	-0.711456393	0.000131998	0.000763114	-0.168533169	0.187742836	0.346364339	-0.618981663	0.000423106	0.002611189	-0.879989562	7.42348E-05	0.00043258	0.09247473	0.370927752	0.461549337
ENSMUSG00000079283	2310009B15Rik	69549	RIKEN cDNA 2310009B15 gene [Source:MGI Symbol;Acc:MGI:1916799]	0.566900482	1.048884993	0.95348949	1.211511992	1.098348503	0.552040286	-0.249476396	-0.709963069	0.14474181	0.60575765	-1.313647431	-0.580604727	-0.228770848	0.675115292	0.772991151	0.041102434	0.948092986	0.96187703	1.134528243	0.067806905	0.173791656	1.404401526	0.044426727	0.101475845	1.175630678	0.116031812	0.178112036	1.363299091	0.016734196	0.035265693
ENSMUSG00000056268	Dennd1b	329260	DENN/MADD domain containing 1B [Source:MGI Symbol;Acc:MGI:2447812]	5.622728951	5.674020718	5.791453215	5.236809973	5.376316662	5.564616351	5.816525665	5.889126187	5.859315917	5.504866726	5.594401854	5.807472782	-0.24036283	0.057802848	0.125704002	-0.281543305	0.046679982	0.086509912	-0.167292599	0.189670851	0.348742934	-0.208473074	0.125609812	0.226517619	-0.448835904	0.009725478	0.022676458	0.073070231	0.479862398	0.570568118
ENSMUSG00000033964	Zbtb41	226470	zinc finger and BTB domain containing 41 [Source:MGI Symbol;Acc:MGI:2444487]	4.61023082	4.590124723	4.591333771	5.001630364	5.070397572	5.189614773	4.915264699	4.971059692	4.878260147	5.044209036	5.168751696	5.174284744	0.206252776	0.045505938	0.105326307	0.504103386	0.000461927	0.00207942	-0.327290727	0.006018536	0.03129098	-0.029440118	0.779656537	0.856814224	0.176812659	0.157523722	0.229214955	-0.533543503	4.06474E-05	0.000282619
ENSMUSG00000033952	Aspm	12316	abnormal spindle microtubule assembly [Source:MGI Symbol;Acc:MGI:1334448]	3.686269672	3.026005781	2.977206091	1.6490337	2.106477631	2.5756359	0.256091605	0.198287689	0.268142521	0.116154705	0.814540813	0.371739042	0.238472207	0.42839223	0.559010413	-1.027553562	0.010741065	0.026233277	2.991953631	9.47135E-07	5.83133E-05	1.725927862	0.000320637	0.002125135	1.964400069	0.000278501	0.001224735	2.753481424	4.72739E-07	9.62945E-06
ENSMUSG00000070594	Gm4788		predicted gene 4788 [Source:MGI Symbol;Acc:MGI:3646434]	3.8234693	4.229240925	3.946738266	3.562028629	4.051797843	4.142770525	3.889699972	3.923941999	3.831190872	4.255577156	3.981509882	4.164746068	0.237170713	0.154921262	0.265437367	-0.026787545	0.88164481	0.910939085	0.126951613	0.454865826	0.621153648	-0.137006645	0.452682275	0.589709505	0.100164068	0.624282493	0.698745569	-0.1102191	0.444317747	0.536010828
ENSMUSG00000033898	Cfhr2		complement factor H-related 2 [Source:MGI Symbol;Acc:MGI:3611575]	4.44767019	4.813018652	4.613967075	4.23446529	4.580383147	4.762849304	4.614326889	4.69069125	4.586184241	4.79683707	4.831941335	4.955650445	0.219017071	0.124347026	0.225218889	-0.061408141	0.686124276	0.753966022	0.001908858	0.989278766	0.994973182	-0.278516354	0.086805912	0.17018173	-0.059499283	0.729814354	0.788933235	-0.217108213	0.090892026	0.144602842
ENSMUSG00000089991	Gm16332		predicted gene 16332 [Source:MGI Symbol;Acc:MGI:3840155]	5.995319796	6.396227727	6.142087092	5.853814181	6.269594901	6.27688984	6.066115212	6.13880756	5.964682355	6.363778469	6.323109903	6.347940274	0.286664237	0.051173508	0.115078518	-0.024857626	0.865612391	0.897666391	0.152093867	0.293565247	0.467523606	-0.159427996	0.291104767	0.426987436	0.127236241	0.457316225	0.545063556	-0.134570369	0.264287615	0.350332399
ENSMUSG00000104496	Gm5837		predicted gene 5837 [Source:MGI Symbol;Acc:MGI:3648028]	2.088893823	1.905982426	1.875331772	2.135338408	2.210475069	2.143732784	2.119555668	2.105569653	2.052408047	1.978225886	2.0098495	1.837188229	-0.134241738	0.390670376	0.52548343	0.211832191	0.245524732	0.334591875	-0.133458441	0.418676609	0.588749413	0.212615488	0.24400198	0.374855357	0.07837375	0.693602278	0.758512343	0.000783297	0.995502632	0.996722347
ENSMUSG00000085867	Gm5834		predicted pseudogene 5834 [Source:MGI Symbol;Acc:MGI:3643955]	1.070919393	1.619122058	1.046774599	0.629094553	1.119206785	0.676888073	1.314421907	0.949282313	1.689010461	0.539032541	0.854553076	0.337442966	-0.689493031	0.033900914	0.083948573	-0.398019843	0.254232645	0.344364265	-0.087107887	0.777310863	0.868667244	0.204365301	0.550185243	0.675550062	-0.48512773	0.21575054	0.295961933	0.602385144	0.040350602	0.073495551
ENSMUSG00000026365	Cfh	12628	complement component factor h [Source:MGI Symbol;Acc:MGI:88385]	9.31913	9.580332461	9.395412077	9.154238151	9.528040195	9.602860166	9.41346543	9.444249507	9.367489937	9.720455772	9.643102662	9.708337147	0.277995316	0.049304153	0.111898921	0.019198586	0.890939799	0.917761804	0.047580756	0.725487454	0.833827393	-0.211215974	0.152367972	0.263336136	0.066779342	0.680933313	0.748239169	-0.230414559	0.058687299	0.100627494
ENSMUSG00000101795	Gm5835		predicted gene 5835 [Source:MGI Symbol;Acc:MGI:3643957]	3.380649375	3.325973698	3.693915324	3.755250873	4.048841394	3.923285198	2.890037571	3.035726892	2.859919323	2.959664054	3.123112928	3.39513969	0.205391779	0.235192748	0.361702376	0.467415177	0.028770222	0.058261796	0.531078596	0.010513476	0.047075277	0.793101994	0.001345322	0.006437895	0.998493773	0.000590939	0.002241146	0.325686817	0.048420603	0.085645406
ENSMUSG00000026361	Cdc73	214498	cell division cycle 73, Paf1/RNA polymerase II complex component [Source:MGI Symbol;Acc:MGI:2384876]	5.468514006	5.632853179	5.547636399	5.702065919	5.802168221	5.664229062	5.723146749	5.763762494	5.637654909	5.778599936	5.716867819	5.690658771	0.023280084	0.802916531	0.867282206	0.17177024	0.116304339	0.183061396	-0.147495049	0.152680837	0.301547265	0.000995107	0.992303161	0.995743681	0.024275191	0.837124115	0.87808277	-0.170775133	0.056435558	0.097452178
ENSMUSG00000018196	Glrx2	69367	glutaredoxin 2 (thioltransferase) [Source:MGI Symbol;Acc:MGI:1916617]	3.461428241	3.930694939	3.50023384	2.533063004	2.759561497	2.969210465	3.856294887	3.665581743	4.110093318	3.256095122	3.264565928	3.222075643	-0.625391817	0.003783901	0.015696015	-0.843671786	0.001173956	0.004391443	-0.239197122	0.211861159	0.376509559	-0.45747709	0.038481145	0.090637515	-1.082868908	0.000445657	0.001785255	0.386194696	0.028625689	0.054926529
ENSMUSG00000018199	Ro60	20822	Ro60, Y RNA binding protein [Source:MGI Symbol;Acc:MGI:106652]	4.826383748	5.213473671	4.883451373	3.884606294	4.254354268	4.133317369	5.255997122	5.30085881	5.147791194	4.628478105	4.689050223	4.539530146	-0.603044036	0.000788207	0.004802532	-0.8589771	0.000118033	0.000699534	-0.244898601	0.105463351	0.234528074	-0.500831665	0.00610865	0.021005288	-1.103875701	4.00276E-05	0.00026293	0.358145435	0.010886022	0.02470652
ENSMUSG00000018189	Uchl5	56207	ubiquitin carboxyl-terminal esterase L5 [Source:MGI Symbol;Acc:MGI:1914848]	3.278527911	3.250063955	3.024090979	2.772096615	2.356966816	2.994717106	3.008967158	3.026519275	3.006208066	2.476604151	2.63290661	2.54702799	-0.454939945	0.015698546	0.046730164	-0.481592958	0.02255098	0.047799544	0.166469802	0.343807646	0.519425064	0.139816789	0.458235378	0.594657251	-0.315123157	0.151998407	0.222480441	0.621409747	0.001183071	0.004002734
ENSMUSG00000100455	Gm29170		predicted gene 29170 [Source:MGI Symbol;Acc:MGI:5579876]	0.953094694	0.893581127	0.261158025	0.621363356	-0.998777379	-0.272095691	0.999451187	1.156609605	0.543717695	0.89421764	0.621442413	0.047804686	-0.333238914	0.403257482	0.537109582	-1.02036091	0.042853277	0.080591805	-0.209783487	0.614059577	0.750199247	-0.896905484	0.070071627	0.144641164	-1.230144397	0.030971284	0.059419014	0.123455426	0.730403028	0.794367228
ENSMUSG00000026360	Rgs2	19735	regulator of G-protein signaling 2 [Source:MGI Symbol;Acc:MGI:1098271]	8.053048664	8.107565217	7.562997794	3.068044906	3.793358135	3.708549521	8.253164682	8.182946337	8.057980676	6.020118007	6.091471606	5.637088407	-2.202554704	3.1457E-07	1.31231E-05	-4.32009398	6.66351E-10	1.39336E-07	-0.215610258	0.332119863	0.507234953	-2.333149534	4.30142E-07	1.92759E-05	-4.535704238	1.83535E-09	1.79554E-07	1.986944446	2.16909E-07	5.31446E-06
ENSMUSG00000026358	Rgs1	50778	regulator of G-protein signaling 1 [Source:MGI Symbol;Acc:MGI:1354694]	3.129272175	3.851649295	3.184687371	5.365796315	4.935085829	5.230462223	3.492891989	3.481337226	3.550018602	4.677324239	5.190113448	4.744599198	1.396575844	7.48347E-05	0.000816657	1.738986362	3.20665E-05	0.000253992	-0.10638551	0.666982608	0.791877504	0.236025008	0.380339398	0.518566584	1.632600852	0.000161944	0.00079188	-1.502961354	1.41383E-05	0.000128204
ENSMUSG00000080078	Gm15583		predicted gene 15583 [Source:MGI Symbol;Acc:MGI:3783031]	2.746945821	2.668499824	2.646665984	2.552775606	2.682154933	2.615639927	3.088441604	3.177814837	2.947444861	2.332256748	2.541661521	2.375289585	-0.640295924	0.000701851	0.004417816	-0.058372138	0.717054369	0.779445954	-0.384865542	0.022606897	0.081277176	0.197058244	0.235876686	0.365471673	-0.44323768	0.029141598	0.056360166	0.255430382	0.06348148	0.107407417
ENSMUSG00000056220	Pla2g4a	18783	phospholipase A2, group IVA (cytosolic, calcium-dependent) [Source:MGI Symbol;Acc:MGI:1195256]	5.721150438	5.725658434	5.948656586	5.655722719	5.937123681	5.647812855	5.925798057	6.037626679	5.817195647	5.701489087	5.626858935	5.790440427	-0.234188944	0.068144633	0.142796233	-0.021379321	0.870247867	0.901367053	-0.135629895	0.290104881	0.463820579	0.077179728	0.558752281	0.68275017	-0.157009216	0.306831909	0.394494112	0.098559049	0.353458891	0.443530493
ENSMUSG00000032487	Ptgs2	19225	prostaglandin-endoperoxide synthase 2 [Source:MGI Symbol;Acc:MGI:97798]	-1.608424611	-1.381021344	-1.216203564	7.972448936	6.346964706	6.915646198	-3.996779387	-3.78096013	-4.08465794	6.080675369	5.825861084	6.213280666	9.952231569	7.26163E-13	1.27939E-09	8.3339839	2.3737E-11	2.35539E-08	2.546027504	2.32963E-06	0.000114763	0.927779835	0.01268892	0.037585175	10.8800114	4.49404E-12	5.2026E-09	-7.406204065	6.24015E-12	3.46753E-09
ENSMUSG00000099875	Rbm3-ps		RNA binding motif (RNP1, RRM) protein 3 [Source:MGI Symbol;Acc:MGI:3642874]	3.022349777	3.150279152	3.055984116	3.69416787	3.329264761	3.383242483	2.260987834	2.310333526	2.193458358	3.291021824	3.268849867	3.212126006	1.005729791	6.15116E-06	0.000125113	0.352058616	0.030789893	0.06148242	0.822318865	6.37257E-05	0.001149239	0.16864769	0.2611151	0.394326663	1.17437748	1.49697E-05	0.000121472	-0.183410926	0.130329288	0.194932652
ENSMUSG00000006010	Odr4	226499	odr4 GPCR localization factor homolog [Source:MGI Symbol;Acc:MGI:2385108]	5.137210942	4.718090479	4.73980657	4.490645151	4.670952234	4.900220254	4.955534249	4.852645252	5.00031617	5.114734347	5.030527344	5.013380677	0.122469437	0.384908655	0.519695892	-0.132407476	0.401689306	0.496475642	-0.079358473	0.589444012	0.730599234	-0.334235385	0.050110212	0.111559466	-0.211765949	0.245172681	0.328346561	-0.201827909	0.121457727	0.18375208
ENSMUSG00000006005	Tpr	108989	translocated promoter region, nuclear basket protein [Source:MGI Symbol;Acc:MGI:1922066]	6.285486135	6.266827265	6.364812508	7.130298377	6.657910823	6.737683967	6.030881779	5.990540372	6.162661634	6.240650663	6.310861446	6.326145307	0.226070501	0.058615196	0.127035487	0.484683775	0.001663911	0.005845992	0.235454169	0.060821039	0.162430816	0.494067443	0.001474654	0.006916237	0.720137944	0.000240239	0.001086747	0.009383668	0.921868722	0.944300272
ENSMUSG00000100954	Gm10138		predicted gene 10138 [Source:MGI Symbol;Acc:MGI:3708522]	-0.653983369	0.53240088	0.81469773	-1.220620088	-0.543472545	-0.04217479	-0.160244101	-0.566120707	0.988454645	-0.190344297	-0.36434715	1.164990669	-0.017313047	0.977447363	0.985677901	-0.709208106	0.329592015	0.424385232	0.126132689	0.845249432	0.91237025	-0.565762369	0.43442351	0.572364511	-0.583075417	0.468369601	0.554885766	0.143445737	0.797264987	0.849540223
ENSMUSG00000023150	Ivns1abp	117198	influenza virus NS1A binding protein [Source:MGI Symbol;Acc:MGI:2152389]	9.645127539	9.588825754	9.586700123	7.97932001	8.323643155	8.24204152	9.738935164	9.649066768	9.846337779	9.221629797	9.342731334	9.280356941	-0.457535159	0.00191877	0.009342992	-1.380373035	2.28276E-07	6.3679E-06	-0.140529165	0.260910116	0.431203493	-1.063367042	3.18662E-06	7.61936E-05	-1.520902201	3.7141E-07	8.08425E-06	0.317005994	0.007984075	0.019162883
ENSMUSG00000052748	Swt1	66875	SWT1 RNA endoribonuclease homolog (S. cerevisiae) [Source:MGI Symbol;Acc:MGI:1914125]	4.182525561	4.149769201	4.048490437	4.164061124	3.886500862	4.203098019	4.202558881	4.122716222	4.283158433	3.94378192	3.756229827	3.817782465	-0.368178372	0.009827787	0.0327169	-0.055933335	0.684101171	0.752159356	-0.075221184	0.558572784	0.7077345	0.237023853	0.104656386	0.197190629	-0.131154519	0.404603696	0.493351579	0.292957188	0.018225821	0.037750664
ENSMUSG00000053286	Trmt1l	98685	tRNA methyltransferase 1 like [Source:MGI Symbol;Acc:MGI:1916185]	5.655702918	5.424315964	5.283825675	4.985375806	4.985166781	5.228257498	5.711667666	5.695566996	5.586830644	5.323298807	5.032583394	5.020529846	-0.53295611	0.002393528	0.011083631	-0.371883715	0.032044742	0.06351342	-0.209045028	0.172994522	0.328684528	-0.047972633	0.757622301	0.841607368	-0.580928743	0.006341963	0.015948547	0.323911082	0.020911179	0.042359011
ENSMUSG00000103928	Gm37893		predicted gene, 37893 [Source:MGI Symbol;Acc:MGI:5611121]	3.749232559	3.296170933	3.527628284	2.64035357	2.609304652	2.4588275	3.553745973	3.675685766	3.391648047	2.38607793	2.942356199	2.607620238	-0.866016888	0.00103634	0.00587626	-0.961987268	0.001237489	0.004574559	-0.022688081	0.914685409	0.953225071	-0.118658461	0.606033188	0.722104215	-0.984675349	0.002427605	0.007195283	0.843328807	0.0005649	0.002223115
ENSMUSG00000026484	Rnf2	19821	ring finger protein 2 [Source:MGI Symbol;Acc:MGI:1101759]	6.155023369	5.995406674	6.136287923	6.582420823	6.488090454	6.471850643	6.462022789	6.5878209	6.311689986	6.401473218	6.455497891	6.472555697	-0.012613159	0.902685649	0.935390935	0.420615169	0.002872845	0.009055949	-0.373402684	0.004796129	0.026471123	0.059825643	0.599001851	0.715998426	0.047212485	0.717140859	0.778321939	-0.360789525	0.001753517	0.005540108
ENSMUSG00000103238	Gm36527		predicted gene, 36527 [Source:MGI Symbol;Acc:MGI:5595686]	0.243342059	0.342647555	0.546613234	1.499758908	1.206117404	1.059299854	-0.265494845	-0.38780111	0.088479998	0.761703728	1.570842545	1.38639277	1.448627592	0.000572948	0.003801049	0.824108139	0.039358081	0.075107994	0.565882722	0.104408947	0.232854245	-0.058636731	0.87128241	0.918210836	1.389990861	0.004691929	0.012403479	-0.88274487	0.008520677	0.020185751
ENSMUSG00000026483	Fam129a	63913	family with sequence similarity 129, member A [Source:MGI Symbol;Acc:MGI:2137237]	6.300823832	6.442933027	6.382861878	6.861932701	6.431057156	6.357448257	5.602641009	5.709446685	5.465522483	5.370306054	5.477409502	5.330895617	-0.190360959	0.133111044	0.237526838	0.112794731	0.402071072	0.496760168	0.790919401	5.12813E-05	0.00097589	1.094075091	3.90457E-06	8.43582E-05	0.903714132	7.87473E-05	0.000452236	0.981280361	1.20118E-06	1.99365E-05
ENSMUSG00000100594	2810414N06Rik		RIKEN cDNA 2810414N06 gene [Source:MGI Symbol;Acc:MGI:1919065]	-0.039035915	1.5210395	0.391351149	-1.267705173	0.063807956	0.086623559	1.266812259	0.82429366	1.948535336	0.519418227	0.962629633	0.839803785	-0.55529747	0.242811233	0.369897045	-0.789316152	0.159642579	0.236661477	-0.77210747	0.132113499	0.273560997	-1.006126152	0.081460505	0.162171344	-1.561423622	0.021644674	0.043928095	-0.216810001	0.607403292	0.688539089
ENSMUSG00000043019	Edem3	66967	ER degradation enhancer, mannosidase alpha-like 3 [Source:MGI Symbol;Acc:MGI:1914217]	5.996525201	6.303831388	6.159217214	6.145601392	6.49156645	6.38949171	6.468838057	6.57320345	6.329874781	6.187790324	6.186638958	6.195040212	-0.268268102	0.041501417	0.097898482	0.20698254	0.132442091	0.203617257	-0.282545002	0.041378853	0.124288655	0.19270564	0.159177207	0.272259266	-0.075562462	0.616407815	0.691802987	-0.0142769	0.890716711	0.921838378
ENSMUSG00000032666	1700025G04Rik	69399	RIKEN cDNA 1700025G04 gene [Source:MGI Symbol;Acc:MGI:1916649]	0.900966117	1.620531472	0.914120638	0.241754073	0.219618613	0.370036341	1.157499768	1.315282047	0.980629923	1.143147176	1.847033535	1.318390201	0.331692975	0.275281191	0.405751332	-0.830100896	0.030847823	0.061580394	-0.035813214	0.908685182	0.949703171	-1.197607084	0.004435291	0.01639173	-0.865914109	0.041180549	0.075353027	-0.367506188	0.189760558	0.26749403
ENSMUSG00000014980	Tsen15	66637	tRNA splicing endonuclease subunit 15 [Source:MGI Symbol;Acc:MGI:1913887]	3.280391662	3.010248218	3.437822905	3.406931673	3.254498806	2.286623202	2.941464405	2.777591668	3.08597924	2.647827084	2.682406751	2.462339785	-0.31728337	0.184935606	0.301934743	-0.338348259	0.212347639	0.29779259	0.312221924	0.21411981	0.379067398	0.291157035	0.279300248	0.414224302	-0.026126335	0.929357757	0.947569758	0.629505294	0.009705165	0.022476607
ENSMUSG00000026482	Rgl1	19731	ral guanine nucleotide dissociation stimulator,-like 1 [Source:MGI Symbol;Acc:MGI:107484]	5.943153367	6.126742682	6.131471981	6.185899128	6.108222697	5.997058057	6.757066096	6.797279066	6.7545742	6.152534789	6.234680252	6.221045579	-0.568647376	7.64042E-05	0.000829224	0.008183882	0.937466954	0.953249226	-0.695473573	1.99747E-05	0.000500882	-0.118642315	0.270014052	0.40420638	-0.687289691	0.0001099	0.000583389	-0.126826197	0.146951802	0.21568466
ENSMUSG00000008475	Arpc5	67771	actin related protein 2/3 complex, subunit 5 [Source:MGI Symbol;Acc:MGI:1915021]	6.921038683	6.915825643	6.918888378	7.225298381	7.304838634	7.350562473	6.717508728	6.831342427	6.543526855	7.140417171	6.984072548	7.087818243	0.367104137	0.00442886	0.017802323	0.385656186	0.00547504	0.015079154	0.221858997	0.064736774	0.169555669	0.240411046	0.055565586	0.120952229	0.607515183	0.000654798	0.002442	-0.14524514	0.132475461	0.197547134
ENSMUSG00000026480	Ncf2	17970	neutrophil cytosolic factor 2 [Source:MGI Symbol;Acc:MGI:97284]	7.244846412	7.316316221	7.247149814	7.709065893	7.809006273	7.833164888	7.436320742	7.394744666	7.492430979	7.86819427	7.895892025	7.875510186	0.440145915	0.000425041	0.003035818	0.519173627	0.000216997	0.001128192	-0.164121764	0.105424772	0.234479815	-0.085094051	0.396712818	0.535165514	0.355051864	0.008589469	0.020491998	-0.604267679	7.68901E-06	8.2356E-05
ENSMUSG00000042772	Smg7	226517	Smg-7 homolog, nonsense mediated mRNA decay factor (C. elegans) [Source:MGI Symbol;Acc:MGI:2682334]	6.40449746	6.291538256	6.553766353	7.565217546	7.216254004	7.203862021	6.584926735	6.597439357	6.650029602	6.766091427	6.646122407	6.839725967	0.122194368	0.316406285	0.450624037	0.885604361	2.32969E-05	0.00019831	-0.215788257	0.1054936	0.23455054	0.547621736	0.001246772	0.006077249	0.669816104	0.000797994	0.002871951	-0.337982625	0.006620898	0.016433361
ENSMUSG00000026478	Lamc1	226519	laminin, gamma 1 [Source:MGI Symbol;Acc:MGI:99914]	4.865548988	5.228735799	4.709913062	4.54939148	4.748658025	4.7853118	4.612543838	4.649668147	4.388582961	4.718055898	4.416057505	4.26639743	-0.068045242	0.70310445	0.795142219	-0.226985981	0.270821932	0.361964429	0.405438791	0.049290607	0.140461809	0.246498052	0.234474487	0.36398699	0.17845281	0.438595951	0.526891642	0.473484033	0.010940704	0.024806309
ENSMUSG00000073538	E330020D12Rik		Riken cDNA E330020D12 gene [Source:MGI Symbol;Acc:MGI:3761270]	1.215746879	1.245569913	1.167599619	-1.428342308	0.512122186	-1.088354655	1.285169391	1.079527095	1.292782975	0.806301353	0.852659312	0.363902518	-0.495955596	0.179503577	0.295108129	-1.799030741	0.000947032	0.003700752	-0.000391543	0.99916334	0.999452931	-1.303466688	0.008005172	0.026001366	-1.799422284	0.002062028	0.00630407	0.495564053	0.144263236	0.212434267
ENSMUSG00000042699	Dhx9	13211	DEAH (Asp-Glu-Ala-His) box polypeptide 9 [Source:MGI Symbol;Acc:MGI:108177]	6.654986566	6.553244345	6.81617698	7.754412707	7.695922739	7.516861843	6.776564233	6.613937786	7.096014034	7.522337983	7.655329473	7.712981041	0.7928484	0.000147925	0.001384751	0.988613917	4.49415E-05	0.000329808	-0.177045969	0.254296085	0.423329085	0.018719549	0.904736319	0.939712075	0.811567949	0.000755454	0.002743729	-0.969894368	6.769E-06	7.43387E-05
ENSMUSG00000042684	Npl		N-acetylneuraminate pyruvate lyase [Source:MGI Symbol;Acc:MGI:1921341]	6.502609947	6.55385347	6.675023026	7.027880797	7.365121952	7.202132105	6.389779832	6.443527542	6.343436868	7.270791346	7.149480363	7.320613522	0.841929484	7.14452E-06	0.000138893	0.661583271	0.000133125	0.000768013	0.182027362	0.130987443	0.272080974	0.001681149	0.988687209	0.993929466	0.843610633	5.68705E-05	0.000348038	-0.659902121	1.86661E-05	0.000158212
ENSMUSG00000099858	Gm6652		predicted gene 6652 [Source:MGI Symbol;Acc:MGI:3647244]	2.387186986	2.745064437	2.379916676	1.907301581	1.853631118	2.14986667	2.264373946	1.990633182	2.654792824	1.914194394	2.060703488	1.961480166	-0.314617594	0.141397616	0.248173808	-0.516487654	0.044319963	0.082841347	0.198943921	0.363405695	0.538184752	-0.00292614	0.989975415	0.994629237	-0.317543734	0.240104055	0.322865699	0.513561514	0.015356339	0.032769625
ENSMUSG00000066800	Rnasel	24014	ribonuclease L (2', 5'-oligoisoadenylate synthetase-dependent) [Source:MGI Symbol;Acc:MGI:1098272]	3.684462604	3.722138955	3.75361754	4.178189082	4.426001634	4.330150333	4.101872912	4.085783883	4.169537133	4.908266887	5.137385207	5.089100112	0.929504356	3.2527E-06	7.87495E-05	0.614424051	0.000380864	0.001769552	-0.40028817	0.004871611	0.026794964	-0.715368475	0.000109824	0.000931427	0.214135881	0.149329335	0.219405936	-1.329792526	2.78068E-08	1.17772E-06
ENSMUSG00000099227	Mir8114		microRNA 8114 [Source:MGI Symbol;Acc:MGI:5530764]	1.813816107	1.531659456	1.503592144	1.152557284	1.394605897	1.753428326	2.398855934	2.328429922	2.347509784	2.85423521	2.031359732	2.405464864	0.041641302	0.87091967	0.915051887	-0.126262315	0.669374984	0.740244967	-0.736935505	0.017789128	0.068453782	-0.904839122	0.009363101	0.029575306	-0.86319782	0.021685526	0.043998149	-0.778576807	0.005542986	0.014225597
ENSMUSG00000026473	Glul	14645	glutamate-ammonia ligase (glutamine synthetase) [Source:MGI Symbol;Acc:MGI:95739]	10.02490472	10.03765558	9.829243245	9.601611128	9.933053404	9.934571848	10.68593879	10.65021529	10.6239319	10.7549897	10.74871158	10.61018027	0.066404981	0.600007143	0.710717874	-0.109050627	0.432071592	0.527307262	-0.673633348	0.000287021	0.003367652	-0.849088956	5.64565E-05	0.000566277	-0.782683975	0.000364346	0.001521798	-0.740038328	2.49334E-05	0.000196135
ENSMUSG00000101903	Gm29291		predicted gene 29291 [Source:MGI Symbol;Acc:MGI:5579997]	1.93358045	1.813851825	1.668479037	0.737905965	-0.114699038	0.49040905	1.39674095	1.885221521	0.746838318	1.985301105	2.105832629	1.954573084	0.680541877	0.032388444	0.08114342	-1.478310004	0.000765969	0.003117737	0.454231887	0.15049001	0.298712321	-1.704619995	0.000252787	0.001773597	-1.024078118	0.015871872	0.033900991	-0.22630999	0.389079408	0.479940609
ENSMUSG00000100502	Gm28286		predicted gene 28286 [Source:MGI Symbol;Acc:MGI:5578992]	2.439471095	2.711182861	2.968277336	1.765187708	1.315274453	1.446858828	1.767299997	1.597197979	2.35735579	1.678506904	2.604818124	2.614600819	0.388177259	0.244084771	0.371556612	-1.247230012	0.005384874	0.014886899	0.790421786	0.037009111	0.114251238	-0.844985485	0.039259408	0.092115229	-0.456808225	0.284353356	0.371158209	0.402244527	0.184981195	0.261632943
ENSMUSG00000100627	A830008E24Rik		RIKEN cDNA A830008E24 gene [Source:MGI Symbol;Acc:MGI:3041183]	3.555412937	3.428948802	2.991373873	1.016796992	2.130956042	1.565147527	2.904595196	2.781566479	2.719278452	3.149358649	3.184176257	2.575828439	0.227568234	0.384826902	0.519695892	-1.653216335	0.00012439	0.000727896	0.534771024	0.069016028	0.175792201	-1.346013545	0.000657051	0.003698442	-1.118445311	0.005293693	0.013716132	0.30720279	0.201117344	0.280261023
ENSMUSG00000004110	Cacna1e	12290	calcium channel, voltage-dependent, R type, alpha 1E subunit [Source:MGI Symbol;Acc:MGI:106217]	-1.260206723	-1.483042087	-2.207982402	0.500158691	0.541483231	2.229257561	-0.536452861	-1.197339881	0.234291424	2.096338572	2.16109582	2.038882624	2.61970552	0.000171106	0.001542505	2.921311617	0.000240485	0.001220167	-1.160403756	0.039528854	0.120003242	-0.858797659	0.146381474	0.254956298	1.760907861	0.014984708	0.03231412	-3.780109276	2.60642E-06	3.58498E-05
ENSMUSG00000056708	Ier5	15939	immediate early response 5 [Source:MGI Symbol;Acc:MGI:1337072]	7.006521767	7.018450056	6.817029258	8.626039108	8.413850645	8.774585495	7.00669096	7.0627985	6.906751804	8.964683437	8.965321336	8.91086373	1.959557434	2.90215E-09	3.83968E-07	1.625470116	4.83473E-08	2.30805E-06	-0.034229407	0.781404136	0.871644895	-0.368316726	0.013211763	0.03875376	1.591240709	2.70653E-07	6.4826E-06	-1.993786842	5.21286E-10	7.40711E-08
ENSMUSG00000026471	Mr1	15064	major histocompatibility complex, class I-related [Source:MGI Symbol;Acc:MGI:1195463]	5.131287076	5.339239364	5.306273092	3.632482468	4.624978515	4.528155721	5.154820097	5.15903197	5.240359413	4.837768284	5.111347428	5.194057773	-0.144390897	0.427041039	0.557871091	-0.891572731	0.00083659	0.003354087	0.07641116	0.687049106	0.80503426	-0.670770675	0.005752339	0.020093411	-0.815161571	0.003789585	0.010397968	0.220802057	0.183083733	0.259345286
ENSMUSG00000026470	Stx6	58244	syntaxin 6 [Source:MGI Symbol;Acc:MGI:1926235]	5.507678244	5.550542089	5.734217423	6.622446504	6.280351813	6.399473105	5.437648563	5.428143065	5.580163393	5.89144688	5.81426601	6.046574647	0.412578895	0.004259434	0.0172463	0.800748889	5.77724E-05	0.000403101	0.105834598	0.401082742	0.57282219	0.494004591	0.002529234	0.010634417	0.906583487	6.42774E-05	0.000386388	-0.306744297	0.011302214	0.025435017
ENSMUSG00000026469	Xpr1	19775	xenotropic and polytropic retrovirus receptor 1 [Source:MGI Symbol;Acc:MGI:97932]	6.903252128	6.867700098	6.839525748	6.636699588	7.063188312	7.056689906	6.914998919	6.964629169	6.789558849	7.292791542	7.119585578	7.21941116	0.317267307	0.016329942	0.04816887	0.101947477	0.420407809	0.515882456	-0.017131538	0.886863404	0.936549328	-0.232451368	0.083702623	0.165546248	0.084815938	0.559066747	0.640223828	-0.334398845	0.005551526	0.014239623
ENSMUSG00000033701	Acbd6	72482	acyl-Coenzyme A binding domain containing 6 [Source:MGI Symbol;Acc:MGI:1919732]	4.000068397	4.399579707	3.859626989	3.985214475	4.105963714	4.335159255	4.040316737	3.895366221	4.11270116	4.23237607	3.946062198	3.868083303	0.008176566	0.963265271	0.975389812	0.075025455	0.709779079	0.773656411	0.084796159	0.652402187	0.780500447	0.151645048	0.456832599	0.593169312	0.159821614	0.486864837	0.572065154	0.076619593	0.631302236	0.71012556
ENSMUSG00000033684	Qsox1	104009	quiescin Q6 sulfhydryl oxidase 1 [Source:MGI Symbol;Acc:MGI:1330818]	7.258987333	7.305109677	7.310970318	7.265473249	7.781180438	7.732728033	7.13346514	7.219415029	7.039716844	7.66874645	7.760767352	7.805819293	0.610876069	0.000271714	0.002161881	0.361147948	0.015473998	0.035250144	0.162174034	0.210938371	0.375113041	-0.087554087	0.503721042	0.635922638	0.523321982	0.004289975	0.011528467	-0.448702034	0.000978896	0.00343143
ENSMUSG00000033671	Cep350	74081	centrosomal protein 350 [Source:MGI Symbol;Acc:MGI:1921331]	6.666748436	6.669964219	6.8472021	7.48521757	7.110994314	7.248256169	6.749493387	6.792533746	6.832754598	6.181759053	6.244962278	6.392677788	-0.535683085	0.00051724	0.00350476	0.515845165	0.00130363	0.004764542	-0.078634501	0.512762593	0.670112694	0.972893749	6.20075E-06	0.000113609	0.437210664	0.009374776	0.021995338	0.457048584	0.000601214	0.00233755
ENSMUSG00000026466	Tor1aip1	208263	torsin A interacting protein 1 [Source:MGI Symbol;Acc:MGI:3582693]	8.197890009	8.335650435	8.300558905	8.611681663	8.735995011	8.797056853	8.054666557	8.120379598	7.99865212	8.32162951	8.266360794	8.364826179	0.251363861	0.028415405	0.073374531	0.441852288	0.001799102	0.006234255	0.228777347	0.051209135	0.144095058	0.419265774	0.002645722	0.011010894	0.670629635	0.000230785	0.001053588	-0.022586515	0.798557119	0.850341522
ENSMUSG00000102964	9430034N14Rik		RIKEN cDNA 9430034N14 gene [Source:MGI Symbol;Acc:MGI:2444791]	1.998700475	1.181644896	1.886612582	2.818624768	2.013769598	2.137223572	1.876209175	2.106614885	1.730653757	1.709464778	2.455256398	2.292166945	0.260369343	0.403336294	0.537163053	0.539649214	0.145613428	0.21997279	-0.213603959	0.513978561	0.670775822	0.065675911	0.852353381	0.905155397	0.326045255	0.416860689	0.505712504	-0.473973303	0.108168625	0.166797485
ENSMUSG00000050565	Tor1aip2	240832	torsin A interacting protein 2 [Source:MGI Symbol;Acc:MGI:3582695]	7.229100519	7.321388466	7.237123345	7.903682139	7.650049232	7.714633236	7.327243971	7.353779693	7.267230143	7.325520826	7.196492425	7.201619144	-0.074709356	0.460199634	0.589768756	0.453825715	0.001296451	0.004743778	-0.042593015	0.685698313	0.803994005	0.485942057	0.000806909	0.004313038	0.4112327	0.006432053	0.016134721	0.032116342	0.711657835	0.779079215
ENSMUSG00000078193	Gm2000		predicted gene 2000 [Source:MGI Symbol;Acc:MGI:3780170]	4.982186514	4.860390921	5.015149103	5.155080467	5.078663602	5.041345878	3.913876406	3.949314611	3.868459729	4.023585843	3.85213893	3.986783971	0.032389667	0.757941003	0.835129792	0.131396342	0.280157012	0.372080096	1.038550114	1.11455E-06	6.53306E-05	1.13755679	8.86325E-07	3.17341E-05	1.169946456	2.27292E-06	2.8836E-05	1.006160447	2.8556E-07	6.47144E-06
ENSMUSG00000026600	Soat1	20652	sterol O-acyltransferase 1 [Source:MGI Symbol;Acc:MGI:104665]	7.950151735	8.011368376	7.848735633	7.482718834	7.870976459	7.932824106	7.555218463	7.563580997	7.483988797	7.165886262	7.124880539	7.104556054	-0.397770143	0.003734669	0.015560051	-0.137087014	0.269180646	0.360151935	0.416914398	0.003772207	0.022252014	0.677597527	0.000132334	0.001079598	0.279827384	0.064665811	0.109874932	0.814684541	3.07755E-06	4.04478E-05
ENSMUSG00000101523	Csnk2a3		casein kinase 2 alpha 3 [Source:MGI Symbol;Acc:MGI:3704198]	4.846214093	4.879593985	4.915365901	5.133796344	5.150372921	5.185305585	5.196088701	5.196773591	5.205916808	5.300147826	5.111719744	5.266148688	0.013818356	0.884462495	0.923414473	0.278613978	0.021409214	0.045890573	-0.318901854	0.007696119	0.037592999	-0.054106233	0.613290479	0.728439751	-0.040287877	0.739808784	0.797020178	-0.332720211	0.00195922	0.006069913
ENSMUSG00000026596	Abl2	11352	v-abl Abelson murine leukemia viral oncogene 2 (arg, Abelson-related gene) [Source:MGI Symbol;Acc:MGI:87860]	6.034657135	6.280981045	6.39864492	8.636760443	8.85278317	8.842464882	6.414428755	6.566657719	6.343782635	8.968169245	8.899842439	9.178924537	2.548404655	9.45629E-10	1.72851E-07	2.553612492	2.20415E-09	2.94423E-07	-0.200428854	0.182799829	0.34100379	-0.195221017	0.208774357	0.333482047	2.353183638	2.43883E-08	1.11672E-06	-2.748833509	9.00857E-11	1.98646E-08
ENSMUSG00000104293	Gm38043		predicted gene, 38043 [Source:MGI Symbol;Acc:MGI:5611271]	-1.654176335	0.402750898	0.5730503	2.621040114	1.675816626	0.886023089	0.559182442	1.001378868	0.645575843	0.721799401	1.139579534	1.915975209	0.44323237	0.480444317	0.607826895	1.784353585	0.028091833	0.057174092	-1.004361574	0.145066408	0.291805059	0.33675964	0.643478856	0.753400784	0.779992011	0.34333856	0.432456745	-1.447593944	0.023936524	0.047274125
ENSMUSG00000060519	Tor3a	30935	torsin family 3, member A [Source:MGI Symbol;Acc:MGI:1353652]	7.868405568	7.75843046	7.760882403	8.223022611	8.136960613	7.97658537	6.605992134	6.657069919	6.465843688	5.915624469	5.983203996	5.818154577	-0.655895031	4.95756E-05	0.000599353	0.311129999	0.017297813	0.038615011	1.216914762	2.08761E-07	1.95953E-05	2.183939793	6.74741E-10	4.58043E-07	1.528044761	1.27488E-07	3.80875E-06	1.872809794	3.03128E-10	4.95418E-08
ENSMUSG00000033557	Fam20b	215015	family with sequence similarity 20, member B [Source:MGI Symbol;Acc:MGI:2443990]	6.222470314	6.232078448	6.207822254	6.228455818	6.336254849	6.456626997	6.077698242	6.116462851	6.002640721	6.250007598	5.995649694	6.162904945	0.05966237	0.576900481	0.691126378	0.133697069	0.264751566	0.355317688	0.157785393	0.176492925	0.333231882	0.231820092	0.06678147	0.139277612	0.291482462	0.047767076	0.085309288	0.098123023	0.302369667	0.391437835
ENSMUSG00000026594	Ralgps2	78255	Ral GEF with PH domain and SH3 binding motif 2 [Source:MGI Symbol;Acc:MGI:1925505]	5.520624313	5.662191552	5.544363308	4.205541901	4.288032222	4.24540759	5.84774559	5.80381521	5.908882366	5.401812366	5.545304152	5.429760711	-0.385802493	0.001607422	0.008243008	-1.328704065	5.68682E-08	2.47653E-06	-0.270117672	0.018658894	0.070881095	-1.213019244	1.4618E-07	9.71644E-06	-1.598821737	3.29199E-08	1.38583E-06	0.115684821	0.185978805	0.262856604
ENSMUSG00000070565	Rasal2	226525	RAS protein activator like 2 [Source:MGI Symbol;Acc:MGI:2443881]	5.150964776	5.195534068	5.204454851	4.213894129	4.465521231	4.163520926	5.037775963	4.93499639	5.18027472	4.785593825	5.083965182	4.886655603	-0.11597936	0.367750611	0.503247301	-0.887719811	4.99292E-05	0.000357166	0.134274876	0.324793035	0.500113594	-0.637465575	0.000762985	0.004135539	-0.753444935	0.000563878	0.002158556	0.250254237	0.043376262	0.078085141
ENSMUSG00000049881	2810025M15Rik	69953	RIKEN cDNA 2810025M15 gene [Source:MGI Symbol;Acc:MGI:1917203]	4.166303352	3.903675128	4.070981222	3.191396045	3.219180284	3.355325828	4.124760693	4.066645926	4.255914705	3.059905164	3.288031382	3.287045691	-0.936780588	1.68577E-05	0.00026432	-0.776072102	0.000260898	0.001298603	-0.108710777	0.443094549	0.611086019	0.051997709	0.730595475	0.820686694	-0.88478288	0.000241602	0.001092202	0.828069811	1.91232E-05	0.000160908
ENSMUSG00000033488	Cryzl2	226527	crystallin zeta like 2 [Source:MGI Symbol;Acc:MGI:2448516]	4.474303454	4.288346394	4.340720421	3.886991135	3.895009525	3.937324148	3.60105229	3.444018528	3.729106547	3.831640564	3.438314492	3.581817019	0.016468496	0.910102568	0.940710184	-0.454225062	0.016932555	0.037878754	0.777710397	0.000308871	0.003528643	0.307016839	0.084245944	0.16631301	0.323485335	0.104114261	0.162841175	0.761241901	9.41198E-05	0.000543438
ENSMUSG00000026589	Sec16b	89867	SEC16 homolog B (S. cerevisiae) [Source:MGI Symbol;Acc:MGI:2148802]	0.83843466	2.100790753	1.412000846	-1.670088464	-0.66603069	-1.372590324	2.711493792	2.619713845	2.844110365	2.267751268	2.377456786	2.228388155	-0.421255893	0.201430281	0.322010294	-2.610373139	1.56339E-05	0.000145642	-1.292047696	0.002307496	0.015485865	-3.481164942	9.85925E-07	3.42412E-05	-3.902420835	9.69794E-07	1.60004E-05	-0.870791803	0.010163131	0.023348142
ENSMUSG00000026587	Astn1	11899	astrotactin 1 [Source:MGI Symbol;Acc:MGI:1098567]	-6.158132139	-1.92547628	-4.345033964	0.360888583	0.205786131	0.163382004	-1.694319604	-0.987351933	-2.382800857	0.843007287	0.473664327	0.616074602	2.299872661	0.030343835	0.077155528	4.420128222	0.001658191	0.005833271	-2.527036177	0.025215874	0.087574731	-0.406780616	0.711456132	0.806268535	1.893092045	0.141992964	0.210811826	-4.826908838	0.000128759	0.000694649
ENSMUSG00000040782	Cop1	26374	COP1, E3 ubiquitin ligase [Source:MGI Symbol;Acc:MGI:1347046]	4.742726435	4.464536896	4.568559999	4.856063788	4.62191449	4.807884693	4.733560771	4.595561337	4.945142858	4.546812008	4.760214992	4.674067284	-0.090304424	0.501674467	0.626412123	0.159829408	0.298036839	0.391340899	-0.175247451	0.227677414	0.394081066	0.074886382	0.619240464	0.73368772	-0.015418043	0.927648937	0.946418611	-0.084943027	0.478615545	0.569555865
ENSMUSG00000090394	4930523C07Rik	67647	RIKEN cDNA 4930523C07 gene [Source:MGI Symbol;Acc:MGI:1914897]	2.366413524	1.633566939	2.260493526	4.238874351	3.725552166	3.765635973	-0.49182624	-0.093239571	-0.915167121	1.699373823	2.201459492	2.121363241	2.51204223	2.42931E-06	6.29626E-05	1.753872681	0.000226655	0.001164459	2.592220521	3.08039E-06	0.000142169	1.834050972	0.000156991	0.001234253	4.346093202	1.29814E-07	3.86163E-06	0.080178291	0.760560606	0.819941141
ENSMUSG00000058267	Mrps14		mitochondrial ribosomal protein S14 [Source:MGI Symbol;Acc:MGI:1928141]	3.118368913	2.800028885	2.7250466	2.821675661	2.715044883	2.336589012	2.765613019	2.607020739	2.844434411	2.412469994	3.08813539	2.335985862	-0.058924769	0.814352689	0.874922597	-0.287893078	0.324895409	0.419504324	0.143999754	0.588823304	0.730170373	-0.084968555	0.766955655	0.847486818	-0.143893324	0.656427278	0.727009214	0.202924523	0.37675855	0.467482116
ENSMUSG00000014226	Cacybp	12301	calcyclin binding protein [Source:MGI Symbol;Acc:MGI:1270839]	4.221104413	3.849850287	3.922937349	4.059742813	4.160747088	3.940634489	4.224456875	4.304450895	3.953561635	3.718360797	3.536009368	3.396736905	-0.595642239	0.002526571	0.01157681	0.062551266	0.725473025	0.786259265	-0.162797177	0.335436266	0.510727817	0.495396328	0.015813781	0.044751487	-0.100245911	0.619487973	0.694698654	0.432845062	0.009149911	0.021427943
ENSMUSG00000026721	Rabgap1l	29809	RAB GTPase activating protein 1-like [Source:MGI Symbol;Acc:MGI:1352507]	2.920437001	3.476536903	3.208898545	3.234735606	2.111375567	2.462324365	3.390517838	3.367110996	3.567520952	3.091592204	3.339738735	3.233224422	-0.216649002	0.327890341	0.463053026	-0.717323504	0.012508164	0.029672713	-0.238656388	0.308020309	0.482769713	-0.73933089	0.010706223	0.032905057	-0.955979892	0.004789002	0.012607318	-0.022007386	0.909846083	0.936057305
ENSMUSG00000040423	Rc3h1	381305	RING CCCH (C3H) domains 1 [Source:MGI Symbol;Acc:MGI:2685397]	6.498247406	6.712374868	6.768770854	7.39181704	7.099263749	7.081885124	6.817544242	6.876047582	6.857975511	6.717292671	6.841553373	6.879080522	-0.04673077	0.680818054	0.777661931	0.483666808	0.002026626	0.00686178	-0.186749667	0.136335257	0.279676519	0.343647911	0.015931915	0.044994138	0.296917141	0.056066116	0.097602818	-0.140018897	0.173171475	0.247550744
ENSMUSG00000103739	Gm37653		predicted gene, 37653 [Source:MGI Symbol;Acc:MGI:5610881]	-0.361381983	-0.893925382	0.267150194	0.952746819	0.545858257	-0.714960099	0.086446962	0.335002011	-0.022703048	-0.858943224	-0.050182068	-0.174855671	-0.483650045	0.321217386	0.455766489	0.396093684	0.47853428	0.570675441	-0.437311927	0.392071388	0.565475055	0.442431802	0.431292166	0.569264681	-0.041218242	0.94675427	0.960092731	0.046338118	0.914843421	0.939737119
ENSMUSG00000043467	Zbtb37	240869	zinc finger and BTB domain containing 37 [Source:MGI Symbol;Acc:MGI:2444467]	6.207522543	6.207113341	6.381489092	5.941261093	6.105790531	5.971352986	6.536621962	6.492047566	6.734954526	6.294372095	6.712532894	6.660328722	-0.034063335	0.815925146	0.875789236	-0.235903041	0.158995939	0.235904259	-0.336784994	0.046615744	0.135026254	-0.538624699	0.005506807	0.019420553	-0.572688034	0.008719505	0.020752333	-0.302721658	0.03336915	0.062703129
ENSMUSG00000053332	Gas5		growth arrest specific 5 [Source:MGI Symbol;Acc:MGI:95659]	5.841653622	5.602566914	5.914064729	6.387035932	5.950097565	5.849004224	4.787646336	4.757646218	4.932428212	5.59207171	5.899300389	5.833564822	0.950039914	4.17554E-05	0.000527436	0.237119232	0.168491894	0.247142793	0.937846744	7.45799E-05	0.001283846	0.224926062	0.189889886	0.311187711	1.174965976	5.18334E-05	0.000323918	-0.01219317	0.925743847	0.947162604
ENSMUSG00000064816	Gm22357	115487638	predicted gene, 22357 [Source:MGI Symbol;Acc:MGI:5452134]	1.578429965	1.688671688	2.111480501	2.621860612	2.032201539	2.052156761	1.088774818	1.170300147	1.221214005	2.089453984	2.143999886	2.528983879	1.056191983	0.000504029	0.003441508	0.366380602	0.171362794	0.250491686	0.631261946	0.019014071	0.07179763	-0.058549434	0.819446561	0.884243563	0.997642548	0.004519319	0.012048048	-0.424930037	0.053803904	0.093570835
ENSMUSG00000084667	Gm23212	115487644	predicted gene, 23212 [Source:MGI Symbol;Acc:MGI:5452989]	0.620825694	1.294006882	0.825704029	1.615638728	0.978108103	0.478550522	0.078396477	0.095279985	0.024698766	0.75520149	1.227408054	0.588001871	0.846455424	0.019308268	0.054640549	0.011873942	0.974249446	0.981171038	0.826853877	0.027739553	0.093261827	-0.007727605	0.983281799	0.990195778	0.838727819	0.060621843	0.104047274	-0.019601547	0.945776023	0.961557414
ENSMUSG00000077220	Snord78	115487677	small nucleolar RNA, C/D box 78 [Source:MGI Symbol;Acc:MGI:5453213]	0.95675367	-0.229129162	1.080787757	2.046550266	2.000538234	0.99694725	0.423098644	0.003316489	1.020648647	1.382099753	1.575135886	1.64325897	1.051927215	0.024024077	0.064689883	0.928558421	0.072469664	0.124428201	0.175809868	0.686731653	0.804798054	0.052441074	0.912879684	0.944986927	1.104368289	0.057928225	0.100316492	-0.876117347	0.035749651	0.066288595
ENSMUSG00000026709	Dars2	226539	aspartyl-tRNA synthetase 2 (mitochondrial) [Source:MGI Symbol;Acc:MGI:2442510]	3.632586197	3.360416518	3.52040203	1.717788799	2.961054729	2.558246981	3.265402751	3.293554268	3.183779489	2.619516231	2.845895343	2.79335908	-0.486293696	0.032421079	0.081210535	-0.968361729	0.001298345	0.004748976	0.25550723	0.248635878	0.418020647	-0.226560802	0.338658066	0.477385881	-0.712854499	0.017442121	0.036674126	0.741800927	0.001601781	0.005139015
ENSMUSG00000026708	Cenpl		centromere protein L [Source:MGI Symbol;Acc:MGI:1917704]	3.328724112	3.142847598	2.521572578	2.442837832	2.04405984	2.310170423	2.742249788	2.824283591	2.372738153	1.73082502	2.214398638	1.306590432	-0.815073064	0.019518822	0.055112901	-0.749516244	0.050383437	0.0919751	0.351756634	0.28811055	0.461694747	0.417313454	0.247247471	0.378648213	-0.39775961	0.322291362	0.410683507	1.166829698	0.001176468	0.003985246
ENSMUSG00000026705	Klhl20	226541	kelch-like 20 [Source:MGI Symbol;Acc:MGI:2444855]	5.038553245	5.076273892	4.915139143	4.006998083	4.292233046	4.262702723	5.036762097	4.994787798	4.961390689	4.907665527	4.495587129	4.56804781	-0.342647474	0.028732473	0.074062587	-0.792223803	0.000306913	0.001486106	0.021381323	0.884431556	0.93567373	-0.428195006	0.017466985	0.048569125	-0.77084248	0.001003713	0.003470277	0.364028797	0.012027406	0.026742113
ENSMUSG00000026701	Prdx6	11758	peroxiredoxin 6 [Source:MGI Symbol;Acc:MGI:894320]	3.973519144	4.273929874	4.293763215	4.89923009	5.037603518	5.119620942	4.077411802	3.916469493	4.427627201	4.547680627	4.514639519	4.774720118	0.448120303	0.014663407	0.044360637	0.850839709	0.000498268	0.002215729	0.041792357	0.803001722	0.885678896	0.444511763	0.027483601	0.069557695	0.892632066	0.000891668	0.003143763	-0.406327946	0.013501197	0.029439432
ENSMUSG00000066755	Tnfsf18	240873	tumor necrosis factor (ligand) superfamily, member 18 [Source:MGI Symbol;Acc:MGI:2673064]	-1.650838908	2.119530319	0.280380194	0.449641014	0.741916569	-0.029601273	-2.674383478	-4.047215182	-0.657382862	0.937090646	0.206925309	0.618937443	3.013260851	0.010165741	0.033577057	0.172542982	0.881177682	0.91067701	2.64811828	0.025537758	0.088295306	-0.192599589	0.867890779	0.915261421	2.820661262	0.046886792	0.084063673	-0.365142571	0.687753437	0.758576479
ENSMUSG00000040323	Gm15429		predicted pseudogene 15429 [Source:MGI Symbol;Acc:MGI:3642423]	4.877559193	5.133355921	4.899810117	4.784640918	5.033976486	4.982697985	4.610115081	4.674307506	4.436325125	4.975223159	4.653539457	4.710420183	0.203212247	0.159955475	0.271182249	-0.018528151	0.904824588	0.92939405	0.410166914	0.014884602	0.060471227	0.188426516	0.239677218	0.369708628	0.391638763	0.043734161	0.079191211	0.206954667	0.112338959	0.172139072
ENSMUSG00000040297	Suco	226551	SUN domain containing ossification factor [Source:MGI Symbol;Acc:MGI:2138346]	5.886491678	6.025984685	6.023517914	6.799641761	6.773300614	6.951137164	6.042931566	6.015870951	6.162053447	6.744162658	6.6717632	6.842960544	0.663362018	3.41311E-05	0.000455903	0.853959109	7.53388E-06	8.2689E-05	-0.091748162	0.397616415	0.569922331	0.098848929	0.382036246	0.52030773	0.762210947	7.68173E-05	0.000443535	-0.75511018	2.80102E-06	3.78519E-05
ENSMUSG00000026698	Pigc	67292	phosphatidylinositol glycan anchor biosynthesis, class C [Source:MGI Symbol;Acc:MGI:1914542]	4.61677976	4.49230651	4.48852569	3.634432135	3.867456033	3.845933404	4.538882057	4.344627612	4.747537089	4.293428425	4.229348644	4.218325076	-0.292917525	0.032485749	0.081284587	-0.720559181	0.000242836	0.001228954	-0.010550013	0.934973629	0.965914602	-0.438191669	0.007932866	0.025811201	-0.731109194	0.000577909	0.002202554	0.282367511	0.023005102	0.045818908
ENSMUSG00000026694	Eef1aknmt	71449	EEF1A lysine and N-terminal methyltransferase [Source:MGI Symbol;Acc:MGI:1918699]	3.798339734	4.095208003	3.893020257	3.778620649	3.862315685	3.911300474	4.312175888	4.407459637	4.201558441	4.023950576	4.061491915	4.039232807	-0.264987707	0.0428653	0.10058864	-0.0713884	0.597006597	0.676643195	-0.373807489	0.010859676	0.048122048	-0.180208183	0.197183476	0.319859043	-0.445195889	0.012016362	0.027016972	-0.108819782	0.316059031	0.405322342
ENSMUSG00000026696	Vamp4	53330	vesicle-associated membrane protein 4 [Source:MGI Symbol;Acc:MGI:1858730]	4.60710096	4.516887963	4.653450879	4.663522063	4.649723619	4.678816476	4.75187031	4.748025135	4.823185628	4.7022692	4.845463334	4.88551231	0.032224342	0.746344495	0.826079827	0.074397409	0.510046522	0.600115718	-0.188491726	0.093032163	0.215547084	-0.146318659	0.208014042	0.332535221	-0.114094317	0.377173304	0.466787665	-0.220716068	0.026931572	0.05218767
ENSMUSG00000040225	Prrc2c	226562	proline-rich coiled-coil 2C [Source:MGI Symbol;Acc:MGI:1913754]	7.399840618	7.439309573	7.722203263	8.685398661	7.846330985	7.899541171	7.476224481	7.453666417	7.677149442	7.563151089	7.476159082	7.69354382	0.017576826	0.918466022	0.946291546	0.529761497	0.014194526	0.032854109	-0.034831909	0.846862129	0.913330385	0.477352761	0.024156978	0.062856103	0.494929588	0.038537882	0.071239954	-0.052408736	0.725435133	0.790597385
ENSMUSG00000040124	Gorab	98376	golgin, RAB6-interacting [Source:MGI Symbol;Acc:MGI:2138271]	2.466805838	2.705586661	2.836071054	3.250063688	3.355261504	3.124499737	2.371193404	2.192794304	2.685998095	2.814645538	2.605582033	2.875897986	0.325099822	0.091778305	0.180107954	0.566268942	0.016631764	0.037350222	0.255471963	0.196487806	0.35787224	0.496641083	0.031040047	0.076577576	0.821740905	0.003929513	0.010697392	-0.069627859	0.66850454	0.742295985
ENSMUSG00000102117	Rpsa-ps1		ribosomal protein SA, pseudogene 1 [Source:MGI Symbol;Acc:MGI:3644886]	2.647275946	2.699436551	2.693132176	3.169908015	3.13199915	2.85990168	1.86690946	1.783572646	1.958111274	1.910984453	2.053276714	1.877605586	0.093387025	0.533267526	0.653852822	0.35047912	0.058645543	0.104677359	0.812432814	0.00025407	0.00310153	1.069524908	4.8725E-05	0.000508938	1.162911933	6.50532E-05	0.000390175	0.719045788	0.00018868	0.000931136
ENSMUSG00000026585	Kifap3	16579	kinesin-associated protein 3 [Source:MGI Symbol;Acc:MGI:107566]	4.445559535	5.059556634	4.488817715	4.108815746	4.297392201	4.550005121	4.477324133	4.485303366	4.425847366	4.892587585	4.757975516	4.717359733	0.329712202	0.083022176	0.166163963	-0.330738371	0.117394727	0.184359885	0.223159021	0.246877753	0.415661828	-0.437291551	0.046363624	0.104814233	-0.107579349	0.635619876	0.708904474	-0.10655318	0.503533144	0.593004182
ENSMUSG00000026584	Scyl3	240880	SCY1-like 3 (S. cerevisiae) [Source:MGI Symbol;Acc:MGI:1921385]	5.564572659	5.439372005	5.634998494	5.638013304	5.528705801	5.416616888	5.564172859	5.489038093	5.71373659	5.438230425	5.513387555	5.540742335	-0.095107019	0.371495198	0.507121425	-0.026748466	0.817810344	0.860683432	-0.053691619	0.627845478	0.76135033	0.014666934	0.899448741	0.936948254	-0.080440085	0.547149969	0.629430885	0.0414154	0.654548539	0.730419175
ENSMUSG00000041406	BC055324	381306	cDNA sequence BC055324 [Source:MGI Symbol;Acc:MGI:3590554]	2.196602944	1.59728031	1.742033663	1.017964649	1.070392616	0.852679916	1.571741276	2.251844451	0.502678511	1.117312746	1.201271531	0.840716783	-0.361463647	0.352007944	0.487945603	-0.886049996	0.06461021	0.113268233	0.41106676	0.318042269	0.492857806	-0.113519588	0.797588201	0.869231606	-0.474983235	0.345669789	0.434810278	0.772530408	0.043303269	0.077984056
ENSMUSG00000041396	Mettl18	69962	methyltransferase like 18 [Source:MGI Symbol;Acc:MGI:1917212]	2.211124182	2.220927522	1.559599058	0.906011529	1.490322812	1.623114548	2.814973833	2.778890998	2.564341346	2.321098263	2.185652998	1.732509085	-0.595895252	0.037855626	0.091300409	-0.568032064	0.075852342	0.129040012	-0.720535235	0.020694945	0.076259701	-0.692672048	0.035948522	0.085852288	-1.288567299	0.002238654	0.006738761	-0.124639983	0.595812434	0.677334397
ENSMUSG00000026579	F5	14067	coagulation factor V [Source:MGI Symbol;Acc:MGI:88382]	0.104467749	0.646594276	-0.297175189	0.699179804	0.008364808	0.961804062	-0.223312807	0.223183755	-1.037977968	0.699578142	-0.390218092	-0.271971514	0.3362951	0.494868266	0.620674036	0.44275828	0.440351208	0.534921161	0.468636269	0.370753542	0.544739102	0.575099449	0.322176603	0.460271223	0.911394549	0.168088731	0.24130295	0.132341169	0.765904744	0.823940599
ENSMUSG00000040918	Slc19a2	116914	solute carrier family 19 (thiamine transporter), member 2 [Source:MGI Symbol;Acc:MGI:1928761]	3.481099109	3.283552135	3.2041736	2.43460584	3.210975474	3.484386467	3.109041348	3.26147844	2.89101041	2.759312968	2.948481744	2.946965003	-0.200131154	0.319660167	0.454093495	-0.167909197	0.458528474	0.55236538	0.23128964	0.278005954	0.449875591	0.263511597	0.253820416	0.385869251	0.063380444	0.801792392	0.849229941	0.431420794	0.029432478	0.056272499
ENSMUSG00000026578	Ccdc181	74895	coiled-coil domain containing 181 [Source:MGI Symbol;Acc:MGI:1922145]	2.777618987	2.682317032	2.126361737	1.015416669	0.977488565	1.82400187	2.311611613	2.27936628	2.151804537	2.184199268	1.69703788	1.670392285	-0.392466602	0.163516618	0.275575986	-1.187654378	0.002342185	0.007688478	0.279189428	0.336621937	0.511667899	-0.515998348	0.115632688	0.212408168	-0.90846495	0.021397102	0.043533765	0.67165603	0.016474745	0.034829882
ENSMUSG00000026577	Blzf1	66352	basic leucine zipper nuclear factor 1 [Source:MGI Symbol;Acc:MGI:1201607]	3.442072288	3.481453811	3.78336422	4.527191633	4.207945899	3.930509256	3.734818184	3.850883391	3.643965404	4.322158677	4.060584223	4.313287122	0.464629022	0.013055301	0.040664629	0.597535985	0.006420666	0.017106998	-0.175979366	0.311328254	0.485842744	-0.043072402	0.813545847	0.880059537	0.42155662	0.060181327	0.103470173	-0.640608388	0.000826013	0.003000779
ENSMUSG00000026575	Nme7	171567	NME/NM23 family member 7 [Source:MGI Symbol;Acc:MGI:2449121]	2.383160264	2.602866229	2.271885217	1.083887344	1.862943834	1.809377425	2.628696401	2.760459524	2.416947821	2.064698289	2.412312231	2.16504778	-0.365576114	0.096425859	0.186670574	-0.744080042	0.007993739	0.020503881	-0.185054138	0.402374372	0.574135659	-0.563558066	0.032488856	0.079502347	-0.92913418	0.004249761	0.011440485	0.180521975	0.341027094	0.430647067
ENSMUSG00000026576	Atp1b1	11931	ATPase, Na+/K+ transporting, beta 1 polypeptide [Source:MGI Symbol;Acc:MGI:88108]	0.732547354	0.050293529	0.028868241	1.723417744	2.217301944	2.820918407	1.049419649	1.28547498	0.592149367	3.247859824	3.096074392	3.105425671	2.175347044	8.89093E-06	0.000162517	2.089362737	4.78697E-05	0.000345817	-0.701676948	0.037601803	0.115618469	-0.787661255	0.033509423	0.081245902	1.387685788	0.002832799	0.008176448	-2.877023992	2.1686E-07	5.31446E-06
ENSMUSG00000040848	Sft2d2	108735	SFT2 domain containing 2 [Source:MGI Symbol;Acc:MGI:1917362]	8.395775073	8.574777433	8.475190362	7.218905019	7.584553001	7.507223265	8.848897569	8.86792268	8.798789033	8.389233912	8.308884385	8.348282684	-0.491138488	0.000880902	0.005218176	-1.017046216	3.19964E-06	4.40967E-05	-0.338865241	0.012770443	0.054211503	-0.864772969	1.54916E-05	0.000215209	-1.355911457	7.9658E-07	1.40255E-05	0.152273247	0.134547947	0.200186363
ENSMUSG00000040843	Tiprl	226591	TIP41, TOR signalling pathway regulator-like (S. cerevisiae) [Source:MGI Symbol;Acc:MGI:1915087]	5.038160699	5.026801131	5.015655849	4.598484397	5.085742468	4.829148659	5.377630511	5.387311718	5.277084988	5.310858427	5.134393536	5.157315162	-0.144952702	0.215961912	0.339305913	-0.14188655	0.274805737	0.366196767	-0.315885306	0.020246408	0.074983497	-0.312819154	0.027858972	0.070328338	-0.457771856	0.007633775	0.018561986	-0.170932605	0.108580582	0.167339855
ENSMUSG00000102302	Gm38190		predicted gene, 38190 [Source:MGI Symbol;Acc:MGI:5611418]	3.695712885	3.645624426	3.516736108	3.061807477	3.236977836	3.164302651	4.182274394	3.930511939	4.470491018	3.217402716	3.522999006	3.22797805	-0.843748842	0.000291063	0.002277996	-0.446969599	0.033414692	0.065688074	-0.572825417	0.006458385	0.032997385	-0.176046174	0.359781444	0.498363129	-1.019795016	0.000464454	0.001846124	0.270923425	0.088979497	0.142178707
ENSMUSG00000026571	Dcaf6	74106	DDB1 and CUL4 associated factor 6 [Source:MGI Symbol;Acc:MGI:1921356]	3.991198747	3.896496083	4.1699568	3.679869451	3.427792559	3.545987569	3.902741603	3.760942876	4.231205342	3.530116847	3.61648741	3.819975776	-0.328046679	0.054190212	0.11998891	-0.490179316	0.016137135	0.036497702	0.047814626	0.771493733	0.864913494	-0.114318011	0.522174465	0.651814869	-0.44236469	0.044508022	0.080403829	0.375861305	0.018694207	0.038585488
ENSMUSG00000026568	Mpc2		mitochondrial pyruvate carrier 2 [Source:MGI Symbol;Acc:MGI:1917706]	3.740668503	3.557981965	3.544692765	2.977958713	3.316152803	3.324635599	3.154279095	3.24393855	2.958187735	3.099115717	3.005293358	2.994746989	-0.083177894	0.545160449	0.663806553	-0.364586399	0.034803477	0.067829673	0.495240908	0.00477508	0.026365428	0.213832403	0.186304087	0.306651229	0.130654509	0.460648528	0.547793986	0.578418803	0.000521393	0.002079585
ENSMUSG00000040723	Rcsd1	226594	RCSD domain containing 1 [Source:MGI Symbol;Acc:MGI:2676394]	6.931066814	6.919588853	6.896303806	7.707058395	7.12236963	7.237265538	7.676680755	7.647121323	7.724220452	7.605694487	7.600353965	7.534751353	-0.099096537	0.401884503	0.536103276	0.369471346	0.012208613	0.02909126	-0.767349674	4.87972E-05	0.000942824	-0.29878179	0.034460065	0.08309655	-0.397878327	0.017665856	0.037066014	-0.668253136	3.04294E-05	0.000228461
ENSMUSG00000040713	Creg1	433375	cellular repressor of E1A-stimulated genes 1 [Source:MGI Symbol;Acc:MGI:1344382]	8.55874149	8.627412486	8.518099785	8.178455774	8.42753316	8.526119833	8.438629439	8.493464197	8.350872528	8.27730019	8.279703618	8.288992515	-0.145345045	0.189889343	0.308211896	-0.168349442	0.163763902	0.24171357	0.150337946	0.195704595	0.356882152	0.127333549	0.284995633	0.42069486	-0.018011496	0.892774876	0.919788533	0.295682991	0.007338303	0.017878588
ENSMUSG00000026565	Pou2f1	18986	POU domain, class 2, transcription factor 1 [Source:MGI Symbol;Acc:MGI:101898]	6.115762822	6.330565351	6.260685389	6.01661836	5.71060607	5.583579007	6.214392406	6.218945019	6.219243754	5.817867928	5.864579507	5.764488066	-0.396089061	0.003095993	0.013482613	-0.518065055	0.000925061	0.003628163	0.030659233	0.786806956	0.87449439	-0.091316761	0.446489875	0.584327588	-0.487405822	0.003664076	0.010105489	0.426748293	0.000718731	0.00268837
ENSMUSG00000026564	Dusp27	240892	dual specificity phosphatase 27 (putative) [Source:MGI Symbol;Acc:MGI:2685055]	4.209241794	4.419414668	4.16794945	2.903220516	2.902874216	3.340182805	3.539509121	3.521209474	3.630401596	2.768854456	2.978939108	2.957242878	-0.661020864	0.000713333	0.004471849	-1.193197552	1.39707E-05	0.000132932	0.70118468	0.000683925	0.006363757	0.169007992	0.318973137	0.456816757	-0.492012872	0.020813929	0.042584256	1.362205544	3.86174E-07	8.15308E-06
ENSMUSG00000040612	Ildr2	100039795	immunoglobulin-like domain containing receptor 2 [Source:MGI Symbol;Acc:MGI:1196370]	5.992234984	6.137727023	6.174641911	5.382076586	5.493835869	5.716973862	4.644718663	4.796344509	4.522725086	5.28495578	5.039921927	5.379856484	0.551039461	0.001632281	0.008339702	-0.554813189	0.003228775	0.009899392	1.447075315	5.43626E-07	3.77747E-05	0.341222665	0.04177951	0.096717373	0.892262126	0.000259466	0.001159378	0.896035854	1.03154E-05	0.000101274
ENSMUSG00000103400	Gm15853		predicted gene 15853 [Source:MGI Symbol;Acc:MGI:3801970]	1.635270809	0.797587009	1.073505492	2.022235424	2.032012432	1.936051228	1.290616527	1.080356182	1.385381698	1.690461794	1.633158585	1.379275279	0.342686608	0.186414541	0.303585513	0.808992251	0.015214417	0.034774379	-0.061998944	0.813802367	0.892362656	0.404306699	0.17953422	0.29825867	0.746993307	0.037043422	0.069006924	-0.404685552	0.094376421	0.148969122
ENSMUSG00000026563	Tada1	27878	transcriptional adaptor 1 [Source:MGI Symbol;Acc:MGI:1196415]	4.780714417	4.50484378	4.711098815	4.994570544	5.236473788	5.258744331	4.85770155	4.897035388	4.86080957	4.578203354	4.838617058	4.842691048	-0.119192669	0.356164541	0.492224215	0.536600212	0.00265833	0.008509105	-0.218880629	0.121806232	0.258104358	0.436912251	0.00942308	0.029730964	0.317719583	0.069272111	0.116377817	-0.09968796	0.384633486	0.475427385
ENSMUSG00000040596	Pogk	71592	pogo transposable element with KRAB domain [Source:MGI Symbol;Acc:MGI:1918842]	5.581816822	5.719286657	5.70843082	7.180983298	6.522768951	6.704814593	5.760765769	5.787445732	5.785721406	6.262592151	6.151122532	6.228880917	0.426677199	0.004430077	0.017802323	1.050737727	6.68168E-06	7.54883E-05	-0.104363865	0.425237841	0.595264418	0.519696662	0.002299156	0.009894632	0.946373862	6.16923E-05	0.000373271	-0.531041064	0.000362939	0.001543768
ENSMUSG00000086925	Gm6286		predicted gene 6286 [Source:MGI Symbol;Acc:MGI:3646153]	2.190892495	1.79093303	2.202242749	2.439128784	2.661947852	2.296584697	1.221752968	1.239385389	1.219547046	1.361951451	1.579354845	1.540932441	0.271900409	0.17069214	0.284391365	0.391685044	0.094333152	0.154028697	0.842923417	0.001261719	0.009908312	0.962708052	0.000905456	0.004707248	1.234608461	0.00031797	0.001358733	0.571023008	0.005973554	0.015082626
ENSMUSG00000102870	Gm17868		predicted gene, 17868 [Source:MGI Symbol;Acc:MGI:5010053]	0.499933947	0.697418287	0.451282737	-0.168383454	-1.483902498	-0.877954333	-0.449349913	-0.113162299	-0.862992126	-0.532719234	-0.575857482	-0.656828102	-0.112777832	0.758701975	0.835769394	-1.48528498	0.004337582	0.012488642	1.012139386	0.021386452	0.07821682	-0.360367762	0.405230384	0.544066927	-0.473145595	0.329680838	0.418334509	1.124917218	0.005389705	0.013896395
ENSMUSG00000026558	Uck2	80914	uridine-cytidine kinase 2 [Source:MGI Symbol;Acc:MGI:1931744]	1.285019291	0.829945423	1.269344431	1.225964891	1.937815268	1.858053638	-0.008081638	-0.158335914	0.201004674	0.694972401	0.388468642	0.799979489	0.582256136	0.051832745	0.116026507	0.602437336	0.078467494	0.13266039	1.136345849	0.001971079	0.013838969	1.15652705	0.003418952	0.013470246	1.738783186	0.0003922	0.001614351	0.554089713	0.043767418	0.078687327
ENSMUSG00000052428	Tmco1		transmembrane and coiled-coil domains 1 [Source:MGI Symbol;Acc:MGI:1921173]	6.068706558	6.01057616	5.920766188	5.469515329	5.733701467	5.784351024	5.91748412	5.934565734	5.822070561	6.004129963	5.904732087	5.901893279	0.049223218	0.620652172	0.727726197	-0.30382055	0.015686761	0.035654529	0.112190511	0.29410285	0.46810755	-0.240853258	0.045113622	0.1026734	-0.19163004	0.145011235	0.214376511	0.062967292	0.47303924	0.564073917
ENSMUSG00000088246	Gm25911		predicted gene, 25911 [Source:MGI Symbol;Acc:MGI:5455688]	9.364171909	9.097627406	9.609689175	10.59929812	7.941688023	8.494669287	9.685314262	10.12946518	9.3603376	10.37505879	10.29047497	10.53320372	0.641574293	0.134633352	0.239539771	-0.626963683	0.17459769	0.25429976	-0.422655027	0.332585894	0.507729288	-1.691193003	0.002479258	0.010479025	-1.04961871	0.059359635	0.102361476	-1.06422932	0.010379619	0.023731678
ENSMUSG00000026687	Aldh9a1	56752	aldehyde dehydrogenase 9, subfamily A1 [Source:MGI Symbol;Acc:MGI:1861622]	5.15059991	5.350128486	5.182912706	4.39082807	4.769576068	4.550103487	5.305537163	5.320859807	5.164920664	5.324678893	4.936979388	5.001874309	-0.177626198	0.230994098	0.356988542	-0.630603024	0.002005759	0.006801179	-0.020854335	0.890340412	0.938081836	-0.473831161	0.011636947	0.035174165	-0.65145736	0.003803061	0.010418482	0.156771863	0.233132284	0.315875713
ENSMUSG00000026688	Mgst3	66447	microsomal glutathione S-transferase 3 [Source:MGI Symbol;Acc:MGI:1913697]	2.491230913	2.389607931	2.503970854	2.427756476	2.205303255	2.062892984	2.289255912	2.316145835	2.289306761	1.621152126	1.982665982	1.776521878	-0.487425084	0.012457933	0.039261706	-0.266592386	0.182520517	0.263272248	0.162676498	0.366438716	0.541319294	0.383509196	0.065443677	0.137332863	-0.103915888	0.631214622	0.705060186	0.650101582	0.001053222	0.003642359
ENSMUSG00000015843	Rxrg	20183	retinoid X receptor gamma [Source:MGI Symbol;Acc:MGI:98216]	3.093893602	2.155378505	2.495689491	1.417336935	-0.383864749	1.637434096	-3.648574269	-5.174155401	-1.170259514	-3.046336967	-0.648958832	-1.246868362	1.761902329	0.101354132	0.193674706	-1.739249443	0.155794355	0.231921901	5.923837151	0.000138293	0.002005415	2.422685379	0.057936014	0.124937459	4.184587708	0.007348223	0.018003795	4.161934822	0.000709798	0.002665003
ENSMUSG00000052534	Pbx1	18514	pre B cell leukemia homeobox 1 [Source:MGI Symbol;Acc:MGI:97495]	4.345963686	4.130650956	4.395403186	3.626298638	3.86966983	3.696313654	4.318763448	4.337010334	4.294251197	4.692562499	4.504988542	4.700319085	0.300696633	0.027953165	0.072435249	-0.534784657	0.002134216	0.007144222	-0.031604618	0.805655779	0.887422303	-0.867085908	4.69811E-05	0.000497613	-0.566389275	0.003332673	0.00935114	-0.332301251	0.009540478	0.022166972
ENSMUSG00000026683	Nuf2	66977	NUF2, NDC80 kinetochore complex component [Source:MGI Symbol;Acc:MGI:1914227]	2.125176053	2.149804404	1.559661176	0.401703084	1.804316506	2.07092667	0.57430438	-0.503707906	1.712449459	0.902485536	0.093139703	0.224015871	-0.18746807	0.722984123	0.809413815	-0.314263543	0.610094976	0.688332609	1.353824954	0.030195773	0.098863936	1.227029481	0.065479378	0.137366283	1.03956141	0.148249269	0.218396483	1.541293024	0.00728445	0.017781687
ENSMUSG00000026675	Hsd17b7	15490	hydroxysteroid (17-beta) dehydrogenase 7 [Source:MGI Symbol;Acc:MGI:1330808]	3.355669455	3.499956621	3.358358439	3.342062992	3.759882193	3.337335953	2.955798242	2.813499641	3.015777106	3.856435581	3.621254243	3.529628268	0.751264947	0.000343997	0.002578954	0.097018094	0.573697839	0.656059465	0.485354536	0.009683982	0.04438465	-0.168892317	0.335201927	0.473522998	0.58237263	0.010406551	0.023978736	-0.265910411	0.069233036	0.115599199
ENSMUSG00000026670	Uap1	107652	UDP-N-acetylglucosamine pyrophosphorylase 1 [Source:MGI Symbol;Acc:MGI:1334459]	4.42177127	4.191034199	4.525882034	5.225885047	4.95702006	4.99084945	4.704977838	4.735135421	4.769986801	4.689905119	4.765141917	4.918074355	0.039412447	0.753319926	0.831885565	0.656027605	0.000584961	0.002512763	-0.370589518	0.015201647	0.061283016	0.24602564	0.101714273	0.192876697	0.285438087	0.094746862	0.150735617	-0.410001965	0.003138653	0.008926896
ENSMUSG00000026667	Uhmk1	16589	U2AF homology motif (UHM) kinase 1 [Source:MGI Symbol;Acc:MGI:1341908]	6.733810374	6.957295358	6.880074921	7.153030365	7.335556132	7.390190071	6.936440835	6.987152417	6.90350366	7.096216607	7.017678551	7.13050961	0.129509037	0.227453571	0.353048604	0.441248331	0.002063954	0.006961021	-0.070130672	0.523308997	0.678217053	0.241608623	0.051305735	0.113529671	0.371117659	0.014054495	0.030669971	-0.199639709	0.044324604	0.079575782
ENSMUSG00000102418	Sh2d1b1	26904	SH2 domain containing 1B1 [Source:MGI Symbol;Acc:MGI:1349420]	3.937380579	3.430888242	2.985454276	-0.099144114	1.014911969	0.557427441	2.513641736	2.27771252	2.393505779	1.339978726	1.522066265	0.666362148	-1.134774387	0.004784114	0.018892409	-2.852802577	9.30144E-06	9.59853E-05	1.065936959	0.009588615	0.044063856	-0.652091231	0.105884264	0.198803108	-1.786865618	0.001253449	0.004174756	2.200711346	1.1217E-05	0.000107119
ENSMUSG00000102752	Gm7694	665574	predicted gene 7694 [Source:MGI Symbol;Acc:MGI:3649135]	4.562854785	4.94866796	4.793407712	4.068961	4.020715526	4.263475508	4.820413842	4.799724112	4.993266519	5.067568713	5.307812798	5.353761372	0.363697789	0.022703943	0.061965261	-0.65953879	0.00129285	0.004736359	-0.096854401	0.517773047	0.673618951	-1.120090981	1.6106E-05	0.000220874	-0.756393191	0.001213659	0.004065626	-0.46055219	0.003076092	0.008789196
ENSMUSG00000038473	Nos1ap	70729	nitric oxide synthase 1 (neuronal) adaptor protein [Source:MGI Symbol;Acc:MGI:1917979]	3.32393895	3.52129249	3.532200914	3.271814031	2.725868455	2.93506181	3.720328622	3.781467309	3.762742316	3.880246371	4.003201024	4.072456984	0.220782845	0.119750379	0.218948705	-0.537403291	0.004039768	0.011787537	-0.298105817	0.053823211	0.14921414	-1.056291952	1.99287E-05	0.000259708	-0.835509107	0.00041546	0.00168464	-0.518888661	0.001021972	0.003553752
ENSMUSG00000102193	Gm7299		predicted gene 7299 [Source:MGI Symbol;Acc:MGI:3648716]	0.374414462	0.624350176	0.487468279	0.743454712	0.795413555	0.623482087	-0.658985116	-0.511178604	-0.938340207	0.240076183	-0.393165453	-0.186946577	0.566009623	0.095615329	0.1854633	0.221672701	0.551134713	0.635999712	1.193942294	0.003843545	0.022548365	0.849605373	0.038536215	0.090738313	1.415614995	0.004834297	0.012709699	0.627932671	0.048240681	0.085392399
ENSMUSG00000038463	Olfml2b	320078	olfactomedin-like 2B [Source:MGI Symbol;Acc:MGI:2443310]	5.623550507	6.048599623	5.900540069	6.774171574	7.033206107	7.011756043	5.416890364	5.376144123	5.52776773	6.925810714	6.848512194	6.962583692	1.461106238	1.67284E-07	8.21171E-06	1.083127871	7.76828E-06	8.46407E-05	0.443757346	0.006531285	0.033235386	0.065778979	0.643240118	0.753384345	1.526885217	1.09825E-06	1.74318E-05	-1.017348892	1.60199E-06	2.50335E-05
ENSMUSG00000026663	Atf6	226641	activating transcription factor 6 [Source:MGI Symbol;Acc:MGI:1926157]	6.889662284	7.302411079	7.274348797	8.329461666	8.245550923	8.120449395	7.350921253	7.460793363	7.269981831	7.981376417	7.830696469	7.97596315	0.554653088	0.001716289	0.008638655	1.035961472	2.03621E-05	0.000178467	-0.180534705	0.228233263	0.394797222	0.300773679	0.065024413	0.136576828	0.855426767	0.000369211	0.001540265	-0.735187793	5.90517E-05	0.000374416
ENSMUSG00000053925	Gm9929		predicted gene 9929 [Source:MGI Symbol;Acc:MGI:3708526]	-1.295559545	-5.307289849	-2.333593338	2.407472627	1.361568772	0.85095934	-4.791895783	-6.396320205	-2.83403873	1.598262719	0.951246484	1.47224158	5.990224226	0.000182237	0.001624397	4.283294724	0.00577968	0.015783238	1.789551853	0.146475356	0.293688531	0.082622351	0.948795393	0.967383753	6.072846577	0.001206568	0.004043821	-4.200672373	0.001335936	0.004426146
ENSMUSG00000026659	Dusp12	80915	dual specificity phosphatase 12 [Source:MGI Symbol;Acc:MGI:1890614]	4.33768106	4.439894488	4.253742521	4.106193451	4.157081277	4.443299385	4.362755244	4.344092293	4.437999706	4.429744301	4.759517401	4.628594818	0.234335109	0.097826167	0.188828833	-0.090461648	0.548477047	0.63405535	-0.037601656	0.788354392	0.875445181	-0.362398413	0.030703231	0.07584091	-0.128063304	0.455449192	0.543452004	-0.271936764	0.038322512	0.070215819
ENSMUSG00000096968	Gm26620		predicted gene, 26620 [Source:MGI Symbol;Acc:MGI:5477114]	-0.991048923	-1.504098666	-0.698847881	0.932578595	0.307491895	-0.194246966	-1.228377945	-0.168065688	-2.488094331	0.192665383	0.559133227	0.576174548	1.725130929	0.008729143	0.02983889	1.272125353	0.067845485	0.117843146	0.23807712	0.685021145	0.80340344	-0.214928456	0.739440376	0.827766983	1.510202473	0.054577776	0.095370372	-1.487053809	0.011721745	0.026217755
ENSMUSG00000070524	Fcrlb	435653	Fc receptor-like B [Source:MGI Symbol;Acc:MGI:3576487]	0.028783959	-0.805849744	-0.644346152	2.09089688	0.680049964	0.926950312	-2.984580728	-4.617231447	-1.116353649	1.17941712	0.394265348	0.227511181	3.535095269	0.000602616	0.003952568	1.556275897	0.098470228	0.159620584	2.467423195	0.009365208	0.043381617	0.488603822	0.583321855	0.702819359	4.023699092	0.001553594	0.004994801	-1.067672074	0.142868532	0.210805061
ENSMUSG00000026656	Fcgr2b	14130	Fc receptor, IgG, low affinity IIb [Source:MGI Symbol;Acc:MGI:95499]	8.54801418	8.476168746	8.608350223	9.244877274	9.506245014	9.249565449	7.901253144	7.96258706	7.777463457	8.821249772	8.674684979	8.757648995	0.86727267	1.00409E-05	0.000177919	0.829161847	3.21811E-05	0.000254301	0.656176563	0.000182521	0.002447472	0.61806574	0.000402387	0.002524825	1.48533841	4.86297E-07	9.63439E-06	-0.211096107	0.054937564	0.095184914
ENSMUSG00000059089	Fcgr4	246256	Fc receptor, IgG, low affinity IV [Source:MGI Symbol;Acc:MGI:2179523]	5.42909768	5.181750576	5.291458138	6.339217787	6.460090244	6.463319531	2.533420744	2.739177642	2.167087116	4.052085837	3.641758695	3.820139718	1.34487234	6.83941E-06	0.000134579	1.140614205	9.21294E-05	0.000573186	2.818230792	6.57483E-09	1.52229E-06	2.613972657	2.98793E-08	3.6888E-06	3.958844997	1.36823E-09	1.46436E-07	1.473358452	9.37702E-07	1.6852E-05
ENSMUSG00000059498	Fcgr3	14131	Fc receptor, IgG, low affinity III [Source:MGI Symbol;Acc:MGI:95500]	9.430070544	9.487039308	9.619739302	10.54253698	10.74490522	10.61219129	9.62845626	9.669375547	9.625820237	10.62728901	10.56976401	10.71882731	0.984782288	2.79313E-06	7.004E-05	1.145426312	1.44401E-06	2.54248E-05	-0.133622469	0.282493377	0.45550531	0.027021554	0.830060881	0.890715724	1.011803843	1.87895E-05	0.000144451	-1.118404758	1.91675E-07	4.87683E-06
ENSMUSG00000026649	Cfap126	75472	cilia and flagella associated protein 126 [Source:MGI Symbol;Acc:MGI:1922722]	0.618463106	1.252206351	0.775608286	0.706183055	0.779102733	1.047510494	-0.181497926	-0.516082135	0.371994978	0.631283056	1.181052141	0.99133052	1.065283375	0.00580663	0.02192003	0.016968741	0.963562165	0.972876342	0.968874869	0.013407948	0.055901323	-0.079439765	0.831265467	0.891457455	0.985843609	0.033227848	0.063060281	-0.096408506	0.741076502	0.803546267
ENSMUSG00000058076	Sdhc	66052	succinate dehydrogenase complex, subunit C, integral membrane protein [Source:MGI Symbol;Acc:MGI:1913302]	5.286671242	5.04955985	5.261435142	5.288004564	5.426227045	5.314900818	5.060802689	4.943360055	5.226026108	5.121417566	5.109958357	5.177878574	0.05525333	0.623596753	0.730078393	0.16635418	0.201003474	0.284903608	0.111833019	0.353646294	0.529231317	0.22293387	0.095761178	0.183719692	0.2781872	0.071088971	0.11895543	0.05657969	0.571352046	0.654979354
ENSMUSG00000005674	Tomm40l	641376	translocase of outer mitochondrial membrane 40-like [Source:MGI Symbol;Acc:MGI:3589112]	3.976566739	3.516705061	4.062876152	4.097488429	3.850918478	4.086649847	3.435776831	3.489317251	3.599443031	3.689708374	4.234800319	4.37546768	0.576934587	0.021807151	0.060048552	0.151594588	0.54854377	0.634079718	0.324376381	0.18262153	0.340762699	-0.100963618	0.688433393	0.788335108	0.475970968	0.113484399	0.175130556	-0.252558206	0.21839605	0.299502263
ENSMUSG00000058715	Fcer1g	14127	Fc receptor, IgE, high affinity I, gamma polypeptide [Source:MGI Symbol;Acc:MGI:95496]	8.630803497	8.47464391	8.560886082	9.165028989	9.073537775	9.065626555	8.227565308	8.212788644	8.222923928	8.872557172	8.774931676	8.81534295	0.59827271	8.31449E-05	0.000887816	0.548614399	0.000337645	0.001608009	0.321988958	0.010034869	0.04549752	0.272330647	0.028107836	0.070763694	0.870603357	2.23698E-05	0.000165563	-0.276283752	0.008119228	0.01941348
ENSMUSG00000013593	Ndufs2	226646	NADH:ubiquinone oxidoreductase core subunit S2 [Source:MGI Symbol;Acc:MGI:2385112]	6.005628847	5.939384284	5.994688852	5.903895205	5.970968615	5.95743774	5.777409213	5.894009398	5.622859699	5.803617849	5.826428676	5.843750077	0.058590132	0.538828485	0.658462817	-0.023535536	0.821499909	0.863781164	0.210128896	0.053816299	0.14921414	0.128003228	0.235339845	0.364963287	0.18659336	0.138454114	0.206595547	0.151538763	0.088379411	0.141447786
ENSMUSG00000006403	Adamts4		a disintegrin-like and metallopeptidase (reprolysin type) with thrombospondin type 1 motif, 4 [Source:MGI Symbol;Acc:MGI:1339949]	-5.693168125	-0.316043414	-0.98698423	7.186427963	4.408394941	3.955022105	-4.265254501	-3.025245373	-4.572230455	2.279081116	1.869142785	4.043140904	6.455418527	0.000459157	0.00321179	7.21459514	0.000621014	0.002629802	1.496270705	0.302761383	0.477082706	2.255447317	0.168546448	0.284466925	8.710865845	0.000336437	0.001423605	-4.959147822	0.001623842	0.005195397
ENSMUSG00000052423	B4galt3	57370	UDP-Gal:betaGlcNAc beta 1,4-galactosyltransferase, polypeptide 3 [Source:MGI Symbol;Acc:MGI:1928767]	6.227451793	6.185800429	6.423522799	8.784548738	8.783484517	8.790316034	6.652972445	6.633565272	6.810009925	9.198375335	9.233521248	9.431814302	2.569392672	1.9045E-10	4.94279E-08	2.51955049	5.60515E-10	1.29222E-07	-0.44081356	0.004159435	0.023906858	-0.490655742	0.002629663	0.010967062	2.07873693	2.03429E-08	9.52065E-07	-3.010206232	7.27172E-12	3.65381E-09
ENSMUSG00000062729	Ppox	19044	protoporphyrinogen oxidase [Source:MGI Symbol;Acc:MGI:104968]	5.509512251	5.545702328	5.755658192	5.3011219	5.000236213	4.976217531	5.501952984	5.451743146	5.704274376	5.301277507	5.403094701	5.520800015	-0.158371801	0.215249165	0.338585897	-0.546127099	0.001825945	0.006305252	0.04181025	0.748245729	0.849512068	-0.345945048	0.025492275	0.065484223	-0.504316848	0.007089302	0.017497233	0.200182051	0.086487299	0.139269915
ENSMUSG00000053483	Usp21	30941	ubiquitin specific peptidase 21 [Source:MGI Symbol;Acc:MGI:1353665]	6.343994043	6.439312369	6.501108482	6.990804014	6.594171907	6.675755662	6.495945614	6.474312375	6.610626848	6.726678344	6.714623542	6.795366169	0.208309293	0.067937269	0.142522582	0.274570214	0.032409071	0.06409835	-0.100433739	0.373090181	0.547130666	-0.034172818	0.766977653	0.847486818	0.174136475	0.205682262	0.284199123	-0.308743032	0.005452	0.014025847
ENSMUSG00000062963	Ufc1	66155	ubiquitin-fold modifier conjugating enzyme 1 [Source:MGI Symbol;Acc:MGI:1913405]	3.878661824	3.576550726	3.728036503	3.66769197	3.956941522	4.003222511	3.681777399	3.566261305	3.82696117	3.771455076	3.796919716	3.849647758	0.112304433	0.399750805	0.534334473	0.190218578	0.217608097	0.303789738	0.031857542	0.818136315	0.895348172	0.109771687	0.466844477	0.602465281	0.22207612	0.203616119	0.281961237	-0.080446891	0.498200474	0.588020475
ENSMUSG00000079137	Rpl27-ps1		ribosomal protein L27, pseudogene 1 [Source:MGI Symbol;Acc:MGI:3645348]	2.403371992	1.77085445	1.908943056	2.257500998	2.316615853	2.409577199	1.603173563	1.66726122	1.38520682	1.852581112	1.869736407	1.681492948	0.268301522	0.20976529	0.331973047	0.313052457	0.204286412	0.288702628	0.482218432	0.044764815	0.131279884	0.526969366	0.044235114	0.101137954	0.795270888	0.010893707	0.024894782	0.21391691	0.265556771	0.351444666
ENSMUSG00000103983	Gm20045		predicted gene, 20045 [Source:MGI Symbol;Acc:MGI:5012230]	1.788158664	0.835121702	0.540378646	1.04639286	0.813755922	1.133780707	1.748169529	1.589118103	1.481051822	2.293850337	1.78462069	1.192962832	0.207479914	0.590943922	0.703039562	-0.05152139	0.907771344	0.931439509	-0.534639887	0.20418684	0.367355398	-0.793641191	0.095416772	0.18316012	-0.586161277	0.252777323	0.336422933	-0.742119802	0.05212978	0.091195934
ENSMUSG00000013973	Dedd	21945	death effector domain-containing [Source:MGI Symbol;Acc:MGI:1333874]	5.487570638	5.342039624	5.475136967	5.955788513	5.73777735	5.890880782	5.884563442	5.8739214	5.958347983	5.683922797	5.712456416	5.79622585	-0.183179645	0.075797697	0.154941378	0.414400944	0.002061951	0.006955954	-0.483565658	0.000466243	0.004837223	0.114014931	0.294110418	0.43017287	-0.069164714	0.570747294	0.650650042	-0.300386013	0.003801065	0.010458387
ENSMUSG00000013997	Nit1	27045	nitrilase 1 [Source:MGI Symbol;Acc:MGI:1350916]	4.534448575	4.302114712	4.235294134	3.54879685	3.5853482	3.405591138	4.182868912	4.153460948	4.059813204	4.340156656	4.270115272	4.026081624	0.104000964	0.441026134	0.571483423	-0.843753437	0.000132004	0.000763114	0.227958087	0.12511659	0.262992838	-0.719796314	0.000483444	0.002881171	-0.615795349	0.00351462	0.009770883	0.123957123	0.309461711	0.398650045
ENSMUSG00000006412	Pfdn2	18637	prefoldin 2 [Source:MGI Symbol;Acc:MGI:1276111]	3.645153365	3.746332941	3.818902241	4.109586089	4.207989971	4.221982635	3.974916389	3.904986506	4.146430535	4.292944117	4.290344839	4.445907751	0.320304029	0.01569894	0.046730164	0.452786088	0.004448919	0.012745801	-0.272917391	0.041744645	0.125089863	-0.140435332	0.293132588	0.429342493	0.179868697	0.236592477	0.318853578	-0.59322142	0.000102151	0.000581325
ENSMUSG00000102929	Gm37154		predicted gene, 37154 [Source:MGI Symbol;Acc:MGI:5610382]	0.103394344	0.950823145	1.056266177	1.941093324	1.739760249	1.469339724	0.889635567	1.186744005	0.883892606	1.268757235	2.069646869	2.209460532	0.845958331	0.03170352	0.079801649	0.968033247	0.033651978	0.066058114	-0.303442212	0.421515665	0.591518625	-0.181367295	0.658650825	0.765186023	0.664591036	0.164118331	0.236876037	-1.149400543	0.003669225	0.010178289
ENSMUSG00000006411	Nectin4	71740	nectin cell adhesion molecule 4 [Source:MGI Symbol;Acc:MGI:1918990]	5.983392484	6.109262217	5.718257204	5.26434001	5.250106755	5.231155572	5.586772862	5.60321536	5.35503803	5.461408977	5.226476112	4.994065244	-0.263256249	0.115836754	0.213620627	-0.702204561	0.001759492	0.00612296	0.445745332	0.019224743	0.072445307	0.00679702	0.969066233	0.981357931	-0.256459229	0.21657572	0.296888682	0.709001582	0.000289549	0.001290928
ENSMUSG00000048865	Arhgap30	226652	Rho GTPase activating protein 30 [Source:MGI Symbol;Acc:MGI:2684948]	6.798905304	6.765438497	6.900159851	7.418427423	7.229109584	7.296848696	6.956648969	6.915280221	7.099512791	7.592866881	7.614432845	7.721496931	0.640810302	4.88469E-05	0.000592648	0.478257694	0.001032182	0.003963258	-0.181931929	0.10993258	0.240728783	-0.344484538	0.008904516	0.028403919	0.296325764	0.037328522	0.069438649	-0.822742231	1.2158E-06	2.00831E-05
ENSMUSG00000026641	Usf1	22278	upstream transcription factor 1 [Source:MGI Symbol;Acc:MGI:99542]	6.13161436	6.093448249	5.913744563	4.83718633	4.725311469	4.787477339	6.515930975	6.478827308	6.471658577	5.462710752	5.485450302	5.291878659	-1.057512356	4.49725E-07	1.74027E-05	-1.276284206	1.84584E-07	5.43271E-06	-0.434997957	0.001753398	0.012706416	-0.653769808	0.000107338	0.000915218	-1.711282163	3.62735E-08	1.48646E-06	0.622514399	2.16294E-05	0.000177365
ENSMUSG00000103711	Tstd1	226654	thiosulfate sulfurtransferase (rhodanese)-like domain containing 1 [Source:MGI Symbol;Acc:MGI:3648482]	1.554740388	2.093414609	2.24897871	-0.033980679	0.645729781	0.642514284	2.272057467	2.306781055	2.651582818	-0.40075849	0.820025146	0.941677823	-1.964335667	0.000410215	0.002951168	-1.471250484	0.00815384	0.020841426	-0.460181039	0.292292324	0.466030639	0.032904144	0.943938525	0.96509	-1.931431523	0.003025544	0.008634113	1.504154628	0.001489375	0.00483986
ENSMUSG00000038235	F11r	16456	F11 receptor [Source:MGI Symbol;Acc:MGI:1321398]	8.94227675	8.938758324	8.883629579	8.046318443	8.469039338	8.468568868	8.971903008	8.942158427	8.979418708	8.770401001	8.740330218	8.767057437	-0.204922423	0.086453846	0.171647397	-0.543715755	0.000764838	0.00311496	-0.03888158	0.739920005	0.843926244	-0.377674912	0.008726362	0.027934494	-0.582597335	0.001339572	0.004407706	0.166040843	0.106357784	0.16460809
ENSMUSG00000060244	Alyref2	56009	Aly/REF export factor 2 [Source:MGI Symbol;Acc:MGI:1913144]	2.630365013	1.016302064	2.312431905	1.588996733	0.48859035	0.233535466	2.070962375	2.1850382	1.965666111	1.842659764	2.274415557	2.140378704	0.024465544	0.952252887	0.969348363	-1.388774343	0.011721146	0.028132371	-0.064113618	0.882090738	0.93443303	-1.477353505	0.008328938	0.026883272	-1.452887961	0.016778131	0.035541359	-0.088579161	0.811092007	0.860326041
ENSMUSG00000004709	Cd244a	18106	CD244 molecule A [Source:MGI Symbol;Acc:MGI:109294]	3.75134014	3.268026686	3.665884982	6.190957338	5.813354568	6.041682004	1.907793088	1.974011666	1.879547647	5.210943849	5.121691018	5.344739264	3.285858132	2.3148E-10	5.60684E-08	2.431768038	2.12194E-08	1.3668E-06	1.628045435	6.3465E-07	4.27988E-05	0.773955341	0.000905735	0.004707248	4.059813473	3.38758E-10	6.44891E-08	-1.657812697	9.83552E-08	2.93327E-06
ENSMUSG00000004707	Ly9	17085	lymphocyte antigen 9 [Source:MGI Symbol;Acc:MGI:96885]	6.921323415	6.723003311	6.737525339	6.353658406	6.575389404	6.606253347	4.33732873	4.505004991	4.004889187	4.28051428	3.964946741	4.070502994	-0.181509553	0.244848921	0.37240923	-0.247014581	0.162031869	0.23958986	2.509259524	5.44983E-09	1.30533E-06	2.443754496	1.3006E-08	2.40906E-06	2.262244943	1.12478E-07	3.44933E-06	2.690769077	3.96831E-10	5.99215E-08
ENSMUSG00000038179	Slamf7	75345	SLAM family member 7 [Source:MGI Symbol;Acc:MGI:1922595]	0.167999027	0.909110484	0.298275589	2.344190633	1.773507452	2.323907361	-4.876722835	-4.746063904	-4.884304624	-1.181657959	-0.302646837	-0.708935458	4.13926094	1.49304E-06	4.40366E-05	1.684587234	0.007326312	0.019095145	5.270068704	2.25778E-07	2.07716E-05	2.815394998	0.000195666	0.001457472	6.954655937	1.06962E-07	3.31677E-06	1.130807764	0.017129839	0.035946785
ENSMUSG00000015355	Cd48	12506	CD48 antigen [Source:MGI Symbol;Acc:MGI:88339]	6.452039287	6.231252959	6.14339489	5.3643717	5.7434903	5.75215176	5.705670978	5.817344497	5.433261003	5.285621554	5.308828745	5.174991308	-0.380071947	0.015571343	0.046497083	-0.601535381	0.001795957	0.006226462	0.621827569	0.001003462	0.008407776	0.400364135	0.019972715	0.054043816	0.020292188	0.906261006	0.930714711	1.001899516	3.4099E-06	4.37804E-05
ENSMUSG00000059058	Tma7-ps		translational machinery associated 7 homolog (S. cerevisiae), pseudogene [Source:MGI Symbol;Acc:MGI:3705453]	1.061256529	0.945460597	0.729454911	1.135076939	0.642425214	1.48799679	0.583485542	0.471298389	0.698942007	0.776593811	0.500048942	0.625414207	0.038280007	0.882113963	0.921724496	0.203952741	0.501351064	0.592292625	0.323929393	0.248992707	0.418461975	0.489602126	0.124183016	0.224395221	0.527882134	0.135150743	0.202514736	0.285649385	0.239767561	0.323414987
ENSMUSG00000015316	Slamf1	27218	signaling lymphocytic activation molecule family member 1 [Source:MGI Symbol;Acc:MGI:1351314]	2.279611083	2.363815561	2.573936676	8.433925852	6.393553129	6.956716038	2.115550401	2.105839071	2.371870411	5.87516704	6.019978876	6.121129763	3.79018955	2.94707E-08	2.06771E-06	4.643575855	1.26139E-08	9.64339E-07	0.197942245	0.511557996	0.669293999	1.051328551	0.00633842	0.021602879	4.8415181	2.98434E-08	1.30373E-06	-3.592247304	1.58587E-08	7.86818E-07
ENSMUSG00000038147	Cd84	12523	CD84 antigen [Source:MGI Symbol;Acc:MGI:1336885]	8.651968717	8.710205295	8.588048394	7.29502617	7.948313134	7.95581806	7.96885322	7.981000948	7.897979763	7.565390076	7.496520195	7.54308713	-0.41403238	0.008337086	0.028860902	-0.845790942	8.37681E-05	0.000533811	0.713257614	0.000265924	0.003202193	0.281499052	0.07031837	0.144999673	-0.132533328	0.430520536	0.518490792	1.127289994	6.83925E-07	1.30689E-05
ENSMUSG00000073492	Gm10521		predicted gene 10521 [Source:MGI Symbol;Acc:MGI:3642358]	3.958924512	3.361677941	3.543948721	1.775110914	1.762538356	1.507568032	2.962201524	2.877537396	2.978936377	1.872831952	2.406506776	1.898482736	-0.833238283	0.002916524	0.012895084	-1.951531882	8.20371E-06	8.80046E-05	0.680788746	0.01332294	0.055657749	-0.437504852	0.108029135	0.201498541	-1.270743135	0.000877393	0.003110961	1.51402703	9.56376E-06	9.64149E-05
ENSMUSG00000015314	Slamf6	30925	SLAM family member 6 [Source:MGI Symbol;Acc:MGI:1353620]	5.208874593	5.057351054	5.034333026	3.346188076	4.277141168	3.780623599	4.330276901	4.417139355	4.048465766	3.71651359	3.652568502	3.503328465	-0.623975453	0.003464064	0.01467158	-1.212366196	5.29385E-05	0.000375308	0.839091937	0.000627529	0.005962812	0.250701194	0.214794634	0.340281338	-0.373274259	0.110910342	0.171654018	1.463067391	9.79042E-07	1.726E-05
ENSMUSG00000026556	Vangl2	93840	VANGL planar cell polarity 2 [Source:MGI Symbol;Acc:MGI:2135272]	4.291206657	4.144969671	4.068034259	2.678141645	2.603648903	2.553346764	4.257411683	4.372150029	4.043288431	3.320431044	3.627007742	3.295900026	-0.781387815	0.000240133	0.001982291	-1.564613076	1.356E-06	2.4244E-05	-0.057410577	0.717360326	0.828186624	-0.840635838	0.000372926	0.002383675	-1.622023653	3.13543E-06	3.66028E-05	0.723977238	0.000182393	0.000905839
ENSMUSG00000003458	Ncstn	59287	nicastrin [Source:MGI Symbol;Acc:MGI:1891700]	8.133700082	8.362768237	8.290196447	8.046514927	8.304958788	8.294750124	8.039541523	8.133756497	7.947677683	7.934035859	7.940679018	8.002902616	-0.087036019	0.446982267	0.576767384	-0.033805469	0.782747856	0.833379308	0.238147289	0.064236772	0.168787068	0.29137784	0.033684164	0.081565349	0.204341821	0.168138016	0.241323827	0.325183308	0.005920528	0.014970442
ENSMUSG00000026553	Copa	12847	coatomer protein complex subunit alpha [Source:MGI Symbol;Acc:MGI:1334462]	8.033293704	8.077357414	8.101888076	8.246216597	8.326777228	8.319504524	7.910165844	7.874695763	7.99065104	8.090300102	8.101186802	8.148661065	0.183472268	0.069893648	0.145397208	0.234463581	0.03737481	0.071932492	0.14561194	0.157063362	0.307399863	0.196603252	0.073731893	0.150497129	0.38007552	0.00690717	0.017122485	-0.037860328	0.641859259	0.719553649
ENSMUSG00000003464	Pex19	19298	peroxisomal biogenesis factor 19 [Source:MGI Symbol;Acc:MGI:1334458]	5.164962076	5.091625908	5.151283795	5.157207314	5.20137684	5.168764322	5.160656928	5.198589702	5.107908945	5.254145224	5.258082448	5.270803694	0.104475206	0.229837095	0.355714898	0.046981697	0.619062132	0.696639217	-0.023061011	0.795201446	0.880655173	-0.080554521	0.39939604	0.538066767	0.023920686	0.823247769	0.86772106	-0.127536217	0.107673158	0.166199501
ENSMUSG00000089803	Gm10171		predicted gene 10171 [Source:MGI Symbol;Acc:MGI:3704203]	1.700747836	1.454643546	1.492563764	2.518598955	2.273448201	2.672650903	1.901926069	2.017188883	1.714200327	2.295228227	2.001488457	2.165793458	0.261335432	0.174836928	0.289356814	0.941050834	0.000845714	0.003384804	-0.328138621	0.112930997	0.245284147	0.351576782	0.11809559	0.21569602	0.612912214	0.023153529	0.046487763	-0.589474052	0.004063017	0.011069222
ENSMUSG00000026554	Dcaf8	98193	DDB1 and CUL4 associated factor 8 [Source:MGI Symbol;Acc:MGI:91860]	6.989182282	7.002318343	6.974050787	6.34625817	6.39322773	6.318095567	7.018834528	7.082931835	6.941859791	6.458405087	6.718147062	6.553957252	-0.426540575	0.00171779	0.008643077	-0.633054793	0.000158662	0.000884486	-0.02485784	0.823658561	0.898771875	-0.231372057	0.065707582	0.137657929	-0.657912633	0.000374051	0.001554851	0.401682735	0.000968166	0.003399901
ENSMUSG00000013698	Pea15a	18611	phosphoprotein enriched in astrocytes 15A [Source:MGI Symbol;Acc:MGI:104799]	7.578764863	7.636243595	7.606275865	8.034267241	8.13058287	8.181449914	6.88439157	6.894839059	6.879785792	7.433475133	7.391024186	7.445156029	0.532754862	7.19327E-05	0.000789726	0.515554211	0.000190357	0.001017241	0.7251677	6.72976E-06	0.000232817	0.707967049	1.19323E-05	0.000177477	1.240721911	1.95542E-07	5.17423E-06	0.192412839	0.026373514	0.051286546
ENSMUSG00000038034	Igsf8	140559	immunoglobulin superfamily, member 8 [Source:MGI Symbol;Acc:MGI:2154090]	6.426415824	6.360173266	6.218225868	5.91193739	5.891848059	5.93248284	5.775520235	5.873939525	5.57015484	5.431330533	5.587307149	5.364572039	-0.259492303	0.044365907	0.103238053	-0.424031537	0.006346022	0.016937357	0.599119058	0.000421409	0.004462057	0.434579824	0.005507989	0.019420553	0.175087521	0.251361168	0.334826862	0.858611361	3.44678E-06	4.41315E-05
ENSMUSG00000007097	Atp1a2	98660	ATPase, Na+/K+ transporting, alpha 2 polypeptide [Source:MGI Symbol;Acc:MGI:88106]	1.952744215	1.894948	2.002075121	3.57821446	3.12988007	3.434914061	3.218330464	3.18707586	3.306734835	4.326976772	4.025167703	4.299034108	0.955220499	3.93428E-05	0.000506066	1.397284929	3.77089E-06	4.97359E-05	-1.289705864	3.96818E-06	0.000165048	-0.847641434	0.000326756	0.002156556	0.107579065	0.57462672	0.654159993	-2.244926363	2.61249E-09	2.28256E-07
ENSMUSG00000038026	Kcnj9	16524	potassium inwardly-rectifying channel, subfamily J, member 9 [Source:MGI Symbol;Acc:MGI:108007]	1.183142727	1.474932215	1.304507994	0.192417634	-0.484496448	-0.210855706	-1.466085642	-1.592793152	-1.156836273	-0.605926785	0.111104458	-0.186601057	1.207152757	0.004183864	0.016974954	-1.536082413	0.002291582	0.007565271	2.715493333	9.66007E-06	0.000300323	-0.027741837	0.944639629	0.965489533	1.17941092	0.020213341	0.041539014	1.508340576	0.000442606	0.001827248
ENSMUSG00000044708	Kcnj10	16513	potassium inwardly-rectifying channel, subfamily J, member 10 [Source:MGI Symbol;Acc:MGI:1194504]	5.156819798	5.205154994	5.428558391	4.192636666	4.425066894	4.09770013	3.320840109	3.327202468	3.348144558	3.64880341	3.438706323	3.668832087	0.233586647	0.098125877	0.189223305	-1.017589837	2.40896E-05	0.000203808	1.931410099	2.10301E-08	3.71954E-06	0.680233615	0.000710992	0.003928836	0.913820262	0.00018007	0.000860816	1.697823452	1.43165E-08	7.47688E-07
ENSMUSG00000050229	Pigm	67556	phosphatidylinositol glycan anchor biosynthesis, class M [Source:MGI Symbol;Acc:MGI:1914806]	6.219164286	6.570474368	6.574188887	6.694544262	6.597820348	6.489619997	6.463539374	6.534696883	6.429625402	6.672906892	6.465507538	6.649927869	0.103454957	0.428572699	0.55919208	0.104661888	0.46211618	0.555435021	-0.003945259	0.976751884	0.987336669	-0.002738328	0.984490615	0.991197537	0.100716629	0.537922753	0.620924211	-0.107400217	0.348204911	0.438197538
ENSMUSG00000026548	Slamf9	98365	SLAM family member 9 [Source:MGI Symbol;Acc:MGI:1923692]	6.934710964	7.041557091	6.916241164	5.86561564	6.316120066	6.357080265	5.191319199	5.407915783	4.93501509	4.930643569	5.313973305	5.167504278	-0.030778239	0.850194516	0.901538442	-0.73801479	0.001476559	0.00529881	1.791654031	3.83008E-07	2.90751E-05	1.08441748	7.00962E-05	0.000665603	1.053639241	0.000279652	0.001227464	1.82243227	4.93349E-08	1.73509E-06
ENSMUSG00000037995	Igsf9	93842	immunoglobulin superfamily, member 9 [Source:MGI Symbol;Acc:MGI:2135283]	2.812929645	2.812051423	3.452522261	3.417952399	2.913094118	2.866526955	1.331962896	1.423658776	1.455779316	1.80211783	1.449874506	2.151303977	0.331737261	0.218911807	0.342777595	-0.032344597	0.913650711	0.935606345	1.620613128	8.59252E-05	0.001414304	1.256531271	0.0012415	0.006055802	1.588268532	0.000513143	0.002006921	1.288875867	0.000157355	0.000805369
ENSMUSG00000026547	Tagln2	21346	transgelin 2 [Source:MGI Symbol;Acc:MGI:1312985]	4.998233393	4.797840329	4.848928511	6.56506395	6.364869992	6.343830464	4.520545169	4.695424573	4.175988136	5.722752543	5.382076072	5.434644142	1.047651995	2.7842E-05	0.000394272	1.526325941	2.28439E-06	3.48351E-05	0.415385991	0.025938073	0.089261935	0.894059937	0.000283723	0.001932096	1.941711932	7.63584E-07	1.3513E-05	-0.632266004	0.000691478	0.002613171
ENSMUSG00000053318	Slamf8	74748	SLAM family member 8 [Source:MGI Symbol;Acc:MGI:1921998]	6.085672069	5.813981535	5.850133505	6.370673833	6.366242042	6.507005383	4.5766988	4.671414438	4.42087065	4.670198489	4.803907234	4.711753185	0.180822407	0.13625264	0.241554579	0.513835322	0.001769619	0.00615358	1.350488393	2.01795E-07	1.90703E-05	1.683501307	3.68358E-08	4.19079E-06	1.864323715	4.95731E-08	1.9183E-06	1.169665986	1.44701E-07	3.91849E-06
ENSMUSG00000026544	Dusp23	68440	dual specificity phosphatase 23 [Source:MGI Symbol;Acc:MGI:1915690]	1.453705151	1.350222044	1.010639998	0.434472359	0.955948265	0.684819685	0.844389434	0.33543166	1.343490373	0.724929144	1.191893175	0.530361539	0.042786686	0.893884091	0.929618041	-0.534378676	0.170519877	0.249616663	0.432296212	0.217992444	0.383481199	-0.14486915	0.699176366	0.797058762	-0.102082464	0.806444809	0.852987002	0.389509526	0.199751964	0.278665825
ENSMUSG00000037872	Ackr1	13349	atypical chemokine receptor 1 (Duffy blood group) [Source:MGI Symbol;Acc:MGI:1097689]	-0.882012732	-2.723569063	-4.228027572	-1.936250972	-1.23637886	0.822959746	-2.021997108	-2.863036048	-1.810301608	0.922648257	1.202510522	-0.532746201	2.936061163	0.009759028	0.032534566	2.114742074	0.077676185	0.131594824	-0.371519123	0.715273397	0.826500104	-1.192838212	0.297033178	0.433170786	1.743222951	0.179755188	0.255254939	-3.307580285	0.002589812	0.007609489
ENSMUSG00000005338	Cadm3	94332	cell adhesion molecule 3 [Source:MGI Symbol;Acc:MGI:2137858]	-1.482021073	0.999751583	-0.676939065	1.759792711	2.52342267	3.13293938	0.741861702	1.28748701	0.193347243	3.074481256	2.944668193	3.205778678	2.300947559	0.00160257	0.008224196	3.048479468	0.000589242	0.002525773	-1.190871952	0.066699948	0.172303785	-0.443340042	0.503307708	0.63556765	1.857607516	0.024999534	0.049634633	-3.491819511	2.44062E-05	0.000193081
ENSMUSG00000037860	Aim2	383619	absent in melanoma 2 [Source:MGI Symbol;Acc:MGI:2686159]	6.760919386	6.56306644	6.881470838	6.675624791	6.494924148	6.529860853	6.457359309	6.403271381	6.695803186	6.311295161	6.58424145	6.670362084	-0.010042932	0.945374697	0.964488163	-0.166653046	0.309058057	0.402798999	0.182740533	0.250448809	0.419754954	0.026130419	0.870565979	0.917595037	0.016087487	0.930496271	0.948312978	0.192783465	0.150397599	0.219998257
ENSMUSG00000037849	Ifi206	102639543	interferon activated gene 206 [Source:MGI Symbol;Acc:MGI:3646410]	3.414039436	3.191063802	4.166347345	5.094620824	4.717292104	5.65062569	-2.293638137	0.135205484	-4.863475514	-2.261200517	-1.430757526	-0.49121735	0.839256052	0.404516103	0.53833577	1.572880747	0.19002589	0.272485514	5.914894611	0.000120907	0.001823709	6.648519307	0.000105184	0.000905898	7.487775359	9.48789E-05	0.000522832	5.07563856	0.00012802	0.000692004
ENSMUSG00000070501	Ifi214		interferon activated gene 214 [Source:MGI Symbol;Acc:MGI:3584522]	3.168079487	3.198895289	3.11559575	4.589360053	4.162886994	3.765151238	0.373626736	0.246982653	0.34157738	0.74557498	0.070140692	0.014790549	-0.039929155	0.87523881	0.917577356	0.932562939	0.007728742	0.019919792	2.847750151	3.29942E-07	2.68044E-05	3.820242245	4.00758E-08	4.34948E-06	3.78031309	1.42877E-07	4.11794E-06	2.887679306	5.93885E-08	1.96903E-06
ENSMUSG00000073491	Ifi213	623121	interferon activated gene 213 [Source:MGI Symbol;Acc:MGI:3695276]	3.826774052	3.342188092	3.959497648	4.792990598	4.391882734	4.729399143	-4.80187048	-4.599130756	-4.778807376	-1.743368413	-0.752764216	-0.728538706	3.65251833	7.77657E-07	2.70757E-05	0.88979775	0.061004817	0.108124384	8.446429358	2.10166E-10	1.45114E-07	5.683708777	4.07962E-08	4.39334E-06	9.336227107	6.64542E-10	9.56526E-08	4.793911027	1.8347E-08	8.81925E-07
ENSMUSG00000043263	Ifi209	236312	interferon activated gene 209 [Source:MGI Symbol;Acc:MGI:2138243]	5.227859077	4.916281239	4.939669433	6.295301469	5.819565519	5.505404742	2.435419577	2.561767396	1.994852479	2.646606508	1.920356294	1.844536648	-0.1850825	0.492540299	0.618637167	0.776923295	0.023654263	0.049728363	2.703655008	8.80969E-07	5.53775E-05	3.665660804	8.61288E-08	6.9162E-06	3.480578304	4.94967E-07	9.72572E-06	2.888737509	8.64097E-08	2.6735E-06
ENSMUSG00000066677	Ifi208	100033459	interferon activated gene 208 [Source:MGI Symbol;Acc:MGI:2442822]	2.502757977	2.566826248	2.292468205	4.115629949	4.022068926	3.432597846	-2.771144205	-2.211165055	-3.874892868	-0.031633794	-1.31950664	-1.341745403	2.043392802	0.001761658	0.008809557	1.346832919	0.04021814	0.076567138	5.404258453	5.60887E-07	3.87654E-05	4.70769857	5.80867E-06	0.000108606	6.751091372	4.81715E-07	9.58736E-06	3.360865651	1.35812E-05	0.000124111
ENSMUSG00000073490	Ifi207	226691	interferon activated gene 207 [Source:MGI Symbol;Acc:MGI:2138302]	5.319537611	4.976576934	4.895263964	7.833299663	7.541440721	7.295986662	-0.489165727	1.313668183	-3.103158879	3.432293019	3.69512061	3.127371708	4.217454052	0.00092551	0.005399908	2.451501361	0.034880343	0.067950881	5.813895702	0.00013919	0.002010001	4.047943011	0.002737745	0.011323988	8.265397063	4.21393E-05	0.000274706	1.59644165	0.070852254	0.117680477
ENSMUSG00000073489	Ifi204	15951	interferon activated gene 204 [Source:MGI Symbol;Acc:MGI:96429]	6.091056856	5.61148913	5.835285438	7.415227933	7.057024562	7.000697302	1.593145259	1.820312315	1.2552744	2.933873632	3.238332209	2.98137129	1.516184226	5.26885E-06	0.000111577	1.277106101	7.84677E-05	0.000506775	4.279590278	2.04198E-10	1.45114E-07	4.040512152	8.10234E-10	4.68991E-07	5.556696378	9.78987E-11	3.31709E-08	2.763406052	3.73836E-09	3.01938E-07
ENSMUSG00000090272	Mndal	100040462	myeloid nuclear differentiation antigen like [Source:MGI Symbol;Acc:MGI:3780953]	1.164329564	1.263756352	1.872664992	3.09208584	2.328148023	2.649246318	-5.049420457	-4.792563441	-4.938192804	-2.507015088	-1.791373481	-1.369807887	2.997054322	5.53205E-05	0.000643646	1.178919989	0.053897982	0.097291411	6.355010155	6.26919E-08	7.67177E-06	4.536875822	4.70469E-06	9.51346E-05	7.533930144	8.90421E-08	2.92429E-06	3.357955834	8.05799E-06	8.49329E-05
ENSMUSG00000026536	Ifi211	381308	interferon activated gene 211 [Source:MGI Symbol;Acc:MGI:3041120]	3.711112345	3.258607112	3.551183749	5.683098757	4.977517198	4.727954736	-1.580222872	-1.930354525	-1.164563203	1.199576509	1.406226259	1.096956843	2.822700937	2.3031E-07	1.049E-05	1.51588309	0.000280533	0.001379038	5.076516977	8.822E-10	4.37697E-07	3.76969913	5.08619E-08	5.08326E-06	6.592400067	4.57797E-10	7.6623E-08	2.25381604	8.22972E-07	1.51427E-05
ENSMUSG00000039997	Ifi203	15950	interferon activated gene 203 [Source:MGI Symbol;Acc:MGI:96428]	-0.91290178	-0.071873925	1.542389509	3.096610179	2.014619929	2.170212085	-3.717644016	-2.402798057	-3.985028503	-2.978479766	0.519366178	1.174372073	2.875283055	0.026862396	0.070277288	2.087874751	0.137767604	0.210523325	3.525524875	0.012780414	0.054228927	2.738116572	0.060321332	0.128901329	5.613399626	0.00270579	0.007878607	0.650241821	0.53824439	0.624930303
ENSMUSG00000026535	Ifi202b	26388	interferon activated gene 202B [Source:MGI Symbol;Acc:MGI:1347083]	4.204519901	3.955769443	4.338105092	5.401049757	5.160060902	5.338122166	-0.01054653	-0.346602526	0.83101666	-0.410976935	1.54392787	1.000751327	0.60206635	0.263545549	0.393040769	1.11386168	0.083727952	0.139868772	3.997223366	1.36038E-05	0.000382708	4.509018696	9.47772E-06	0.000149682	5.111085046	8.67835E-06	7.99467E-05	3.395157016	1.43296E-05	0.000129433
ENSMUSG00000054203	Ifi205	226695	interferon activated gene 205 [Source:MGI Symbol;Acc:MGI:101847]	1.268622512	1.494658388	1.460256402	4.337645888	3.329303893	3.245244131	-2.778406206	-3.649948335	-1.571783919	-0.989540743	-0.712239418	-0.955388631	1.810725297	0.00260525	0.011827206	2.107090532	0.002564093	0.008263587	4.079618213	4.75945E-06	0.000183662	4.375983447	6.29717E-06	0.000114353	6.186708745	6.08131E-07	1.13554E-05	2.268892916	0.000241831	0.001125465
ENSMUSG00000026526	Fh1		fumarate hydratase 1 [Source:MGI Symbol;Acc:MGI:95530]	4.404024168	4.17001767	4.076096063	4.298693422	4.37733713	4.366559788	4.129891971	4.350765295	3.674710394	4.316261725	4.144526464	4.003589616	0.117179442	0.513040768	0.636581132	0.145293017	0.47431606	0.567105492	0.165913881	0.383933748	0.557442269	0.194027456	0.344234352	0.483161364	0.311206898	0.188288625	0.264944085	0.048734439	0.759092085	0.819034845
ENSMUSG00000026525	Opn3	13603	opsin 3 [Source:MGI Symbol;Acc:MGI:1338022]	1.541011383	1.286304845	1.240531147	0.677971026	1.376181247	1.010239125	1.221957301	0.960160964	1.276318138	1.889717947	0.835849837	1.028979734	0.082928497	0.799231355	0.864444253	-0.286925142	0.453593332	0.548083723	0.217530116	0.530862651	0.684558057	-0.152323523	0.688365663	0.788335108	-0.069395026	0.869462126	0.901789447	0.134601619	0.651155258	0.72756767
ENSMUSG00000078185	Chml		choroideremia-like [Source:MGI Symbol;Acc:MGI:101913]	4.657163711	4.858050009	4.500212543	4.126824004	4.214695918	4.195690352	4.508690437	4.475345402	4.426391846	4.392826195	4.310802436	4.096922792	-0.183313632	0.179888525	0.295531148	-0.488849724	0.006084685	0.016400358	0.213933817	0.141546911	0.287019368	-0.091602275	0.539131262	0.666750779	-0.274915907	0.120960154	0.184575841	0.397247449	0.005169748	0.013456649
ENSMUSG00000039748	Exo1	26909	exonuclease 1 [Source:MGI Symbol;Acc:MGI:1349427]	0.597650115	1.047482023	0.332113167	-1.069465648	0.489855216	0.394226353	-0.530123549	-0.507127566	-0.656778573	-0.039212711	0.489520829	0.03651712	0.771816861	0.058816043	0.127329355	-0.522826327	0.244683441	0.333805594	1.201696873	0.009882994	0.045014606	-0.092946315	0.831547977	0.891471974	0.678870547	0.180655754	0.256324148	0.429880012	0.223771585	0.305486916
ENSMUSG00000057335	Cep170	545389	centrosomal protein 170 [Source:MGI Symbol;Acc:MGI:1918348]	7.10218772	7.305394879	7.158695107	5.840594532	6.055813572	6.136026904	7.558443479	7.565463261	7.572692179	6.867747242	6.945286306	6.930619257	-0.6510016	4.49019E-05	0.000556447	-1.169582855	3.65942E-07	9.2137E-06	-0.359505115	0.005787859	0.030375873	-0.878086371	6.34507E-06	0.000114773	-1.529087971	1.0418E-07	3.2596E-06	0.291496485	0.006500539	0.01618668
ENSMUSG00000026504	Sdccag8	76816	serologically defined colon cancer antigen 8 [Source:MGI Symbol;Acc:MGI:1924066]	3.653815619	3.306910617	3.627449567	2.990010532	2.813691412	2.809015792	3.057811543	3.031067708	3.184808157	2.913755061	3.322433813	3.248701672	0.076390807	0.649785238	0.751733555	-0.675454289	0.00395656	0.011608137	0.42997343	0.030034989	0.098523275	-0.321871665	0.112047184	0.206977902	-0.245480859	0.266979548	0.351986322	0.353582623	0.034767371	0.064743743
ENSMUSG00000103251	Gm37519		predicted gene, 37519 [Source:MGI Symbol;Acc:MGI:5610747]	0.408800521	0.056733981	0.00254189	-1.498119844	-1.321134265	-2.461791192	0.524583876	0.443720557	0.401943921	-1.565632929	-0.599837963	-1.816791106	-1.671392496	0.00411268	0.016744826	-1.993551135	0.003404005	0.010312249	-0.29147425	0.562732282	0.711261656	-0.613632888	0.278192132	0.413021813	-2.285025384	0.002894541	0.008328701	1.379918246	0.007360752	0.017926316
ENSMUSG00000019699	Akt3	23797	thymoma viral proto-oncogene 3 [Source:MGI Symbol;Acc:MGI:1345147]	5.100970428	4.968553795	5.097999085	4.659550701	4.383787039	4.825428994	4.638725632	4.515425503	4.927406984	3.989988351	4.054350754	4.250524089	-0.613606054	0.00121733	0.006645398	-0.439638108	0.018980173	0.041516701	0.352160124	0.038535686	0.117708389	0.526128069	0.007274676	0.024102027	-0.087477985	0.63909219	0.711970224	0.965766177	1.02984E-05	0.000101178
ENSMUSG00000063659	Zbtb18	30928	zinc finger and BTB domain containing 18 [Source:MGI Symbol;Acc:MGI:1353609]	8.087674026	7.956481502	8.032172296	8.211245375	7.033450372	7.282338862	8.327328077	8.309949273	8.429654968	7.130948666	7.293124227	7.164435332	-1.155772719	5.24898E-05	0.000620531	-0.646538662	0.007207864	0.018832357	-0.347234962	0.095150614	0.218701576	0.161999095	0.428932787	0.566889448	-0.993773624	0.00111997	0.003798492	0.808537757	0.000319323	0.001393666
ENSMUSG00000015961	Adss	11566	adenylosuccinate synthetase, non muscle [Source:MGI Symbol;Acc:MGI:87948]	5.179212772	5.331855956	5.40454916	5.414803868	5.293549502	5.26573206	5.364455018	5.343480733	5.467220061	5.48892347	5.410419786	5.558039019	0.079683965	0.437815619	0.568158298	-0.0011003	0.992211743	0.994263091	-0.085502336	0.430261296	0.599697996	-0.166286601	0.159647479	0.272879543	-0.086602636	0.505146172	0.590399682	-0.165186301	0.08560363	0.138054983
ENSMUSG00000026502	Desi2	78825	desumoylating isopeptidase 2 [Source:MGI Symbol;Acc:MGI:1926075]	4.677128308	4.793063437	4.719082441	4.451725477	4.702121797	4.55516976	5.117087247	5.219334497	4.92935807	4.638807173	4.483495436	4.51071161	-0.545630118	0.000448061	0.003159625	-0.141288868	0.280211774	0.372080096	-0.352956294	0.011560245	0.050217298	0.051384956	0.687805761	0.787976054	-0.494245162	0.004959975	0.01297871	0.192673824	0.076290337	0.125399962
ENSMUSG00000026500	Cox20	66359	cytochrome c oxidase assembly protein 20 [Source:MGI Symbol;Acc:MGI:1913609]	3.292361588	2.947687801	3.191302227	2.241384158	2.388518369	2.168747312	2.634136925	2.607268155	2.60100603	2.51083643	2.302035181	2.368181138	-0.224271518	0.158493797	0.269311342	-0.872643585	0.000313853	0.001514432	0.53103562	0.006002735	0.031243908	-0.117336447	0.502673732	0.635119917	-0.341607965	0.10040582	0.15816279	0.755307138	0.000146102	0.000761594
ENSMUSG00000039630	Hnrnpu		heterogeneous nuclear ribonucleoprotein U [Source:MGI Symbol;Acc:MGI:1858195]	8.353054623	8.286724555	8.368755077	8.809726434	8.661209281	8.776600578	8.205206371	8.211721812	8.255669851	8.695041331	8.743449158	8.8026503	0.515990691	0.000234332	0.001951557	0.403631191	0.002665518	0.008527456	0.100371719	0.342543236	0.517859466	-0.011987781	0.911218279	0.944181721	0.504002909	0.00158377	0.005068357	-0.415618972	0.000421622	0.001753647
ENSMUSG00000026495	Efcab2	68226	EF-hand calcium binding domain 2 [Source:MGI Symbol;Acc:MGI:1915476]	1.312674946	0.111522525	1.086062184	-0.036631688	0.810557008	0.928952145	0.605436216	0.365493133	1.181257836	-0.502114039	1.000971536	0.866075128	-0.235670284	0.650732078	0.752640915	-0.202474601	0.73751611	0.796515106	0.155246106	0.776721287	0.868232207	0.188441789	0.755678356	0.840411444	-0.047228495	0.94400501	0.957864115	0.39091639	0.414972704	0.506350532
ENSMUSG00000055067	Smyd3	69726	SET and MYND domain containing 3 [Source:MGI Symbol;Acc:MGI:1916976]	3.476507645	3.236958058	3.620445386	3.262685362	3.201468395	3.346737976	3.829432642	3.910390475	3.827296604	3.60845861	3.38896297	3.804644078	-0.291689118	0.087944197	0.173935191	-0.170619913	0.355469764	0.450276826	-0.419029848	0.02700238	0.091603678	-0.297960642	0.120733609	0.219303255	-0.58964976	0.013152778	0.029021346	-0.12734073	0.381404873	0.472487649
ENSMUSG00000096474	Gm5561		predicted gene 5561 [Source:MGI Symbol;Acc:MGI:3804971]	2.133684252	2.172149686	2.17208569	2.237680022	2.329622412	2.390528095	1.45021838	1.497244375	1.440181946	1.314145814	1.512358212	1.497815067	-0.020024558	0.899296236	0.933569221	0.175235905	0.346651174	0.44135461	0.694135668	0.001378306	0.010631555	0.889396131	0.00041054	0.002562095	0.869371573	0.001151218	0.003884558	0.714160226	0.00034585	0.001486094
ENSMUSG00000026492	Tfb2m	15278	transcription factor B2, mitochondrial [Source:MGI Symbol;Acc:MGI:107937]	3.693902541	3.960800278	3.556011525	3.179570088	3.276307176	3.276975119	3.96283163	3.888205264	3.926497448	3.761679223	3.552915604	3.39210336	-0.341488932	0.041256487	0.097505125	-0.484216512	0.014800187	0.033989784	-0.178793605	0.275807999	0.446981418	-0.321521184	0.082006761	0.16302775	-0.663010116	0.004974091	0.013010746	0.162695328	0.244932968	0.328722712
ENSMUSG00000038949	Cnst	226744	consortin, connexin sorting protein [Source:MGI Symbol;Acc:MGI:2445141]	4.407495776	4.223751736	4.255474385	2.538904826	3.120917952	3.367125585	4.785424074	4.780521794	4.799998611	4.239734172	4.198247553	4.371845292	-0.531174385	0.0034409	0.014595719	-1.200681022	1.3365E-05	0.000128312	-0.497838218	0.007143017	0.035582281	-1.167344854	1.75054E-05	0.000235161	-1.69851924	1.56976E-06	2.22522E-05	0.033336168	0.799291883	0.850732673
ENSMUSG00000038936	Sccpdh	109232	saccharopine dehydrogenase (putative) [Source:MGI Symbol;Acc:MGI:1924486]	3.941408303	4.18823092	3.745840792	3.284468319	3.688191508	3.94314125	4.119302598	4.077566895	4.089560499	4.566306673	4.505558529	4.409437872	0.408591132	0.020451213	0.057072771	-0.263305816	0.151566013	0.227062984	-0.127756321	0.439742902	0.607972571	-0.799653269	0.000677367	0.003783668	-0.391062137	0.068021447	0.114678877	-0.536347453	0.002190277	0.006647875
ENSMUSG00000026491	Ahctf1	226747	AT hook containing transcription factor 1 [Source:MGI Symbol;Acc:MGI:1915033]	5.519016631	5.493201795	5.631039105	6.41308795	6.2870823	6.390691755	5.718728645	5.731164462	5.774755312	6.283545064	6.172680913	6.371356873	0.516672203	0.000214013	0.00182285	0.807875467	9.65673E-06	9.90639E-05	-0.202907357	0.06884289	0.175544315	0.088295908	0.419740204	0.557939998	0.604968111	0.000395993	0.001625152	-0.719579559	3.30594E-06	4.27219E-05
ENSMUSG00000026490	Cdc42bpa	226751	CDC42 binding protein kinase alpha [Source:MGI Symbol;Acc:MGI:2441841]	4.137742922	4.455575955	4.235348071	4.342323277	4.144666658	4.213694107	4.396236392	4.332802745	4.513815451	4.738224869	4.884884101	4.765241108	0.390079774	0.007193228	0.025861368	-0.071397624	0.603722826	0.682418022	-0.130472656	0.319225282	0.494004413	-0.591950054	0.001019495	0.005168913	-0.20187028	0.209417355	0.288699602	-0.52055243	0.000454483	0.001865745
ENSMUSG00000026489	Coq8a	67426	coenzyme Q8A [Source:MGI Symbol;Acc:MGI:1914676]	3.397745106	3.580374473	3.120314153	1.673526217	1.725298232	2.378416385	3.613273554	3.674717954	3.501053291	3.279272882	3.292970037	3.238634612	-0.321165442	0.098124875	0.189223305	-1.394046092	2.60886E-05	0.00021728	-0.22963949	0.246312429	0.415011797	-1.30252014	4.85839E-05	0.000508516	-1.623685582	1.94535E-05	0.000148081	0.091525952	0.577734329	0.660566692
ENSMUSG00000010609	Psen2	19165	presenilin 2 [Source:MGI Symbol;Acc:MGI:109284]	4.768825835	4.6773526	4.808682895	5.083199925	5.112379164	5.143816699	4.392601548	4.384070725	4.435914972	4.66205383	4.583317157	4.722366819	0.240037694	0.025895904	0.068444805	0.369444304	0.00481188	0.013595003	0.342793281	0.005123514	0.027901157	0.47219989	0.000912471	0.004731634	0.712237585	9.18895E-05	0.000508983	0.102755586	0.242006178	0.325707211
ENSMUSG00000038855	Itpkb	320404	inositol 1,4,5-trisphosphate 3-kinase B [Source:MGI Symbol;Acc:MGI:109235]	6.970796983	7.035272024	7.079328463	8.284404919	7.545985806	7.700492746	7.134854881	7.109042346	7.236244227	7.396183746	7.297851879	7.364893721	0.183926425	0.18770698	0.305342549	0.72397498	0.000349176	0.001653852	-0.133273643	0.353123299	0.528735225	0.406774913	0.015789207	0.044709266	0.590701338	0.004231483	0.011396619	-0.317200067	0.017503175	0.036537057
ENSMUSG00000104388	Gm37033		predicted gene, 37033 [Source:MGI Symbol;Acc:MGI:5610261]	0.142043527	0.453358632	0.996367483	3.022304833	1.682618915	0.512075151	0.657385128	1.238864935	0.234414224	-0.097201756	1.753001138	0.924193378	0.22092676	0.716805493	0.804545682	0.929750854	0.205130193	0.289777165	-0.183791404	0.774627827	0.8670882	0.52503269	0.46399662	0.599668903	0.74595945	0.353681025	0.443082046	-0.404718164	0.469953232	0.561020048
ENSMUSG00000026496	Parp1	11545	poly (ADP-ribose) polymerase family, member 1 [Source:MGI Symbol;Acc:MGI:1340806]	6.694591364	6.609942127	6.598741196	5.796706401	5.843159854	5.76979592	6.361718349	6.330966249	6.35246801	5.930720428	5.944021148	5.862208559	-0.427822969	0.000310894	0.002388794	-0.822523333	1.969E-06	3.14406E-05	0.284792615	0.00750795	0.036881342	-0.10990775	0.252102417	0.383845547	-0.537730718	0.000319187	0.001362673	0.712615583	8.64038E-07	1.57522E-05
ENSMUSG00000098926	Mir6904		microRNA 6904 [Source:MGI Symbol;Acc:MGI:5530808]	0.728346978	1.269337637	1.356325419	0.358002748	0.365596338	0.020827441	0.407332841	0.394073276	0.60290649	-0.067291666	0.060969778	0.287211624	-0.395568268	0.180130373	0.295858494	-0.899010306	0.017357209	0.038722716	0.641663505	0.049933802	0.141477994	0.138221467	0.676314981	0.778922874	-0.257346801	0.487966542	0.573117282	1.037231773	0.001704316	0.005404328
ENSMUSG00000058729	Lin9	72568	lin-9 homolog (C. elegans) [Source:MGI Symbol;Acc:MGI:1919818]	4.019983698	4.200109389	4.003485835	2.521392374	2.695629832	2.710524601	4.02884197	4.267717927	3.668890169	2.234259959	2.169275604	2.133410427	-1.807588021	1.89402E-07	9.07299E-06	-1.412326388	7.71742E-06	8.43338E-05	0.087966505	0.607995746	0.745676428	0.483228139	0.021158478	0.056614201	-1.324359882	4.21751E-05	0.000274811	1.895554527	3.81817E-08	1.44924E-06
ENSMUSG00000026499	Acbd3	170760	acyl-Coenzyme A binding domain containing 3 [Source:MGI Symbol;Acc:MGI:2181074]	5.92944419	6.017814999	6.014211477	6.343652375	6.274291215	6.381026231	6.044506657	6.064577224	6.09050208	6.060163412	6.175046495	6.199949552	0.073467757	0.418699287	0.55091594	0.334662838	0.005087922	0.014224474	-0.078974963	0.409280883	0.580176534	0.182220118	0.08457895	0.16673897	0.255687875	0.040770614	0.074691464	-0.15244272	0.071615526	0.118820362
ENSMUSG00000060743	H3f3a		H3.3 histone A [Source:MGI Symbol;Acc:MGI:1097686]	5.597653235	5.397599359	5.476956151	5.664312689	5.733844961	5.693229941	5.55658154	5.548532379	5.523148154	5.709386523	5.661893726	5.656841325	0.135793679	0.1520025	0.261565556	0.223798615	0.042871684	0.080591805	-0.059746009	0.533837751	0.686867188	0.028258927	0.77810469	0.855819334	0.164052606	0.170304953	0.243980242	-0.195539688	0.028687986	0.055030862
ENSMUSG00000038806	Sde2	208768	SDE2 telomere maintenance homolog (S. pombe) [Source:MGI Symbol;Acc:MGI:2384788]	4.682659074	4.64085505	4.561911208	6.003302954	5.637015463	5.844880005	4.800832059	4.652057228	4.983949144	6.152676519	6.103053614	6.061818967	1.297141256	1.65648E-07	8.16339E-06	1.164874423	1.44624E-06	2.54319E-05	-0.183013953	0.149161775	0.297155626	-0.315280786	0.027993966	0.070566536	0.98186047	2.55814E-05	0.000182996	-1.480155209	1.17114E-08	6.45612E-07
ENSMUSG00000026520	Pycr2	69051	pyrroline-5-carboxylate reductase family, member 2 [Source:MGI Symbol;Acc:MGI:1277956]	5.207679784	4.871567803	4.990536126	4.739667084	4.730986601	4.652178115	4.961087677	4.946603366	4.912547576	5.344842995	5.386051949	5.276628763	0.407131115	0.002899409	0.012831663	-0.307186829	0.026115975	0.053942079	0.07426099	0.523723103	0.678257726	-0.640056954	0.000234809	0.001674163	-0.232925839	0.114938748	0.176942496	-0.332870125	0.004876306	0.012834718
ENSMUSG00000038793	Lefty1	13590	left right determination factor 1 [Source:MGI Symbol;Acc:MGI:107405]	2.804798826	2.781715632	2.652473049	1.805205544	2.370629305	2.805192712	2.393048392	2.487886741	2.234191083	3.532574028	3.111020703	3.458766115	0.96744361	0.000519668	0.003516362	-0.324521816	0.181744594	0.262316457	0.373892647	0.104019989	0.232351425	-0.918072779	0.001990861	0.008821273	0.049370831	0.850937872	0.888747381	-0.593550964	0.007018583	0.017229574
ENSMUSG00000026519	Tmem63a	208795	transmembrane protein 63a [Source:MGI Symbol;Acc:MGI:2384789]	8.459393721	8.461261938	8.594481839	8.832611131	9.119871115	9.053725834	8.482145297	8.479284444	8.532446458	9.170237175	9.072118723	9.26051796	0.654879089	0.000103371	0.001058237	0.53669062	0.000974479	0.003786702	-0.00100746	0.993252761	0.996303394	-0.119195929	0.345819302	0.484579559	0.53568316	0.002734919	0.007946766	-0.655886549	2.91126E-05	0.000221001
ENSMUSG00000038776	Ephx1	13849	epoxide hydrolase 1, microsomal [Source:MGI Symbol;Acc:MGI:95405]	5.057350991	5.324701679	4.832114438	4.854014753	5.142437185	5.644726095	4.940646152	5.006108455	4.804823026	4.950166599	4.965107362	4.89191058	0.025796993	0.879811327	0.920218262	0.186175389	0.34037216	0.43479983	0.168626977	0.358235976	0.533113464	0.329005373	0.106195485	0.199198983	0.354802366	0.122975341	0.18726005	0.142829984	0.355290436	0.445340559
ENSMUSG00000026516	Nvl	67459	nuclear VCP-like [Source:MGI Symbol;Acc:MGI:1914709]	5.175496693	4.914979371	5.03799677	5.164075144	5.121325062	5.213567418	4.935926444	4.897595012	4.999874936	4.955310202	5.083543013	5.053902178	0.089273895	0.398747403	0.533557978	0.132115575	0.270696725	0.361866715	0.088154998	0.428684522	0.598521143	0.130996678	0.27491296	0.409553978	0.220270573	0.117112847	0.17951359	-0.001118898	0.990331514	0.99315422
ENSMUSG00000062169	Cnih4	98417	cornichon family AMPA receptor auxiliary protein 4 [Source:MGI Symbol;Acc:MGI:1925828]	5.341100747	5.264703915	5.028355776	5.059007024	5.270174526	5.386987714	5.463213746	5.428483322	5.367748105	5.349438524	5.224314131	5.098083223	-0.180860271	0.160534161	0.272001533	0.057161618	0.678162006	0.747166833	-0.200588311	0.142021528	0.287562027	0.037433577	0.785427369	0.860940467	-0.143426694	0.368084884	0.457660002	-0.019728041	0.856271496	0.894856211
ENSMUSG00000038733	Wdr26	226757	WD repeat domain 26 [Source:MGI Symbol;Acc:MGI:1923825]	7.899759971	7.983636505	8.112958418	8.845983352	9.001940963	8.936760119	8.209881277	8.196251713	8.312111528	9.23155839	9.196778382	9.368046607	1.010412405	1.62961E-06	4.65927E-05	0.947459293	6.68918E-06	7.54883E-05	-0.245502361	0.055667402	0.152802123	-0.308455473	0.025235785	0.064993608	0.701956932	0.000338334	0.001429048	-1.255914766	4.21766E-08	1.55416E-06
ENSMUSG00000054135	A430110L20Rik		RIKEN cDNA A430110L20 gene [Source:MGI Symbol;Acc:MGI:3036249]	-0.074361542	1.492487932	0.643916552	-0.733623379	-1.035688575	0.250935739	0.218279776	-0.423596562	1.3469865	0.73847849	0.06954767	1.025741118	0.146469611	0.796514039	0.862781522	-1.070146659	0.124994338	0.194236927	0.26399387	0.660323161	0.786724644	-0.952622399	0.16857215	0.284475742	-0.806152788	0.286243912	0.37316868	0.117524259	0.820255163	0.866934321
ENSMUSG00000081214	Rpl35a-ps2		ribosomal protein L35A, pseudogene 2 [Source:MGI Symbol;Acc:MGI:3705461]	3.630759784	3.215665992	3.357236489	3.786688417	3.748649064	3.642060079	2.670144654	2.74156855	2.484801904	2.753603888	2.806364055	2.637049264	0.116174094	0.450894557	0.580467721	0.319485464	0.085602408	0.142281485	0.766917499	0.000480561	0.004941493	0.970228869	0.000132875	0.001083273	1.086402963	0.000139437	0.000705154	0.650743405	0.000491463	0.001983556
ENSMUSG00000004880	Lbr	98386	lamin B receptor [Source:MGI Symbol;Acc:MGI:2138281]	5.376787548	5.274119114	5.323515931	5.377812571	5.663522838	5.55342502	5.803541641	5.795929824	5.747822952	6.179469259	5.964323822	6.054528427	0.279987407	0.017791693	0.051347376	0.243370271	0.051239512	0.093274442	-0.459405672	0.001190894	0.009491621	-0.496022808	0.000973565	0.004977829	-0.2160354	0.117965386	0.180700754	-0.739393079	4.32093E-06	5.26546E-05
ENSMUSG00000022995	Enah	13800	ENAH actin regulator [Source:MGI Symbol;Acc:MGI:108360]	-2.739767822	-1.96759385	-1.995290516	0.165740461	0.518033541	1.695766655	-0.969605297	-2.588321223	1.535175806	1.623145579	0.813927395	2.275065367	2.129377489	0.030939039	0.078274473	3.176901244	0.008728172	0.022049784	-1.560720303	0.113495177	0.246104703	-0.513196549	0.61840268	0.73319536	1.616180941	0.175263626	0.250033623	-3.690097792	0.000637914	0.002453463
ENSMUSG00000026511	Srp9	27058	signal recognition particle 9 [Source:MGI Symbol;Acc:MGI:1350930]	3.925846609	4.177004082	4.114060678	4.256662916	4.518728683	4.503231591	3.942162485	3.991356612	3.952554653	4.33277016	4.473147963	4.523594026	0.475243772	0.001619788	0.008288064	0.377700192	0.014005914	0.032498773	0.112176375	0.373322157	0.547266989	0.014632794	0.912123432	0.944555998	0.489876567	0.006554472	0.016394442	-0.363067398	0.004576565	0.012186629
ENSMUSG00000038633	Degs1	13244	delta(4)-desaturase, sphingolipid 1 [Source:MGI Symbol;Acc:MGI:1097711]	6.290241413	6.420927831	6.317609127	6.835748215	6.84232829	6.639735674	6.327332353	6.382127929	6.143079619	6.542975791	6.268301113	6.254084175	0.076288951	0.543460269	0.662607517	0.416164403	0.009608755	0.023892039	0.076674252	0.561295556	0.710091782	0.416549704	0.009673035	0.030361004	0.492838655	0.008226748	0.01977266	0.000385301	0.997167408	0.997957613
ENSMUSG00000047539	Fbxo28	67948	F-box protein 28 [Source:MGI Symbol;Acc:MGI:1261890]	5.31748316	5.229037754	5.193020789	5.715613287	5.764904515	5.815127193	5.673649491	5.709473027	5.569680938	5.731222991	5.633068555	5.629661141	0.016132291	0.859676937	0.907701756	0.529446614	0.000233472	0.00119111	-0.404525016	0.001251276	0.009882161	0.108789306	0.295217866	0.431383885	0.124921597	0.292726418	0.380194035	-0.420657307	0.000233413	0.00109769
ENSMUSG00000026510	Trp53bp2	209456	transformation related protein 53 binding protein 2 [Source:MGI Symbol;Acc:MGI:2138319]	5.241111706	5.505772178	5.451374396	5.59097969	5.700522937	5.781604394	5.412919701	5.40484218	5.509245587	6.765006772	6.758445878	6.887533932	1.34816842	4.90628E-08	3.09809E-06	0.291267144	0.026382792	0.054305785	-0.032860618	0.768241664	0.862835573	-1.089761894	1.1414E-06	3.74855E-05	0.258406526	0.073193595	0.121860668	-1.381029038	9.5709E-09	5.682E-07
ENSMUSG00000026509	Capn2	12334	calpain 2 [Source:MGI Symbol;Acc:MGI:88264]	2.655307787	2.834527726	2.865406493	3.112742853	3.260023913	2.577032003	3.019921343	3.159032849	2.764864784	3.406217594	3.340609282	3.19867138	0.345081158	0.072887405	0.150163404	0.169789061	0.409657902	0.504921264	-0.190529224	0.321810164	0.496897499	-0.365821321	0.092206932	0.178403718	-0.020740163	0.92768372	0.946418611	-0.535610382	0.005658518	0.014428806
ENSMUSG00000038576	Susd4	96935	sushi domain containing 4 [Source:MGI Symbol;Acc:MGI:2138351]	-1.923895491	-1.643333358	-0.882034102	-0.012687335	0.158635485	0.268128348	-0.883624631	-1.443715489	0.316725593	1.386502001	1.327493145	2.44829531	2.296836477	0.001111631	0.006184533	1.630327972	0.021560986	0.046151806	-0.803295924	0.174706954	0.330749507	-1.469804429	0.034906844	0.083897211	0.827032048	0.2497194	0.333119061	-3.100132401	4.50719E-05	0.00030663
ENSMUSG00000079164	Tlr5	53791	toll-like receptor 5 [Source:MGI Symbol;Acc:MGI:1858171]	4.601095437	4.985455413	4.687880375	4.114737248	4.163410938	4.248950192	5.527460026	5.469462094	5.569765646	5.722015483	5.482547963	5.533941252	0.053635674	0.683339599	0.779772771	-0.59017326	0.00168988	0.005922252	-0.74496001	0.000182734	0.00244797	-1.388768944	1.00557E-06	3.44922E-05	-1.33513327	5.21012E-06	5.41758E-05	-0.798595684	2.16408E-05	0.000177365
ENSMUSG00000104367	Gm38079		predicted gene, 38079 [Source:MGI Symbol;Acc:MGI:5611307]	0.354074183	1.304125031	1.121492627	-0.063167341	0.76141479	-0.294933173	1.918242097	1.848985283	1.991663535	2.02309702	1.357940266	1.69219092	-0.261463453	0.442029648	0.572290389	-0.779020583	0.065071733	0.113951407	-1.001921384	0.014661052	0.059762717	-1.519478514	0.002115342	0.009243891	-1.780941967	0.00150672	0.004866623	-0.740457931	0.030395423	0.057890488
ENSMUSG00000030768	Disp1	68897	dispatched RND transporter family member 1 [Source:MGI Symbol;Acc:MGI:1916147]	5.002447084	4.916326025	5.002777676	4.348334908	4.619594833	4.588769578	4.977867883	5.043293384	4.888177397	5.15763712	5.074677166	5.185886484	0.161307578	0.12475323	0.225748584	-0.42096336	0.002613913	0.008401777	0.000489442	0.996272078	0.998212168	-0.581781497	0.000236796	0.001684369	-0.420473919	0.005934586	0.015088445	-0.160818137	0.088989624	0.142178707
ENSMUSG00000102478	BC085271		cDNA sequence BC085271 [Source:MGI Symbol;Acc:MGI:3612444]	-0.031878145	-0.548086341	-0.164353212	0.880861232	0.955206716	0.887647146	0.00781339	0.04719931	-0.047522342	0.605839119	0.653748238	0.696724367	0.646852045	0.032542236	0.081356726	1.14257887	0.00340426	0.010312249	-0.235021553	0.41741051	0.58780809	0.260705271	0.415878434	0.554291779	0.907557316	0.022814169	0.045959171	-0.881873598	0.003757056	0.010355412
ENSMUSG00000046836	Brox	71678	BRO1 domain and CAAX motif containing [Source:MGI Symbol;Acc:MGI:1918928]	6.496449566	6.672136183	6.568490811	6.277284792	6.444925184	6.367446477	6.649073975	6.679760211	6.609612188	6.472754692	6.577213433	6.499902571	-0.124229499	0.209634831	0.331842191	-0.210904111	0.062425217	0.110150021	-0.052988787	0.599564502	0.738857996	-0.139663399	0.198152965	0.32086968	-0.263892898	0.04596169	0.082663941	0.071240712	0.398893072	0.489827858
ENSMUSG00000042901	Aida		axin interactor, dorsalization associated [Source:MGI Symbol;Acc:MGI:1919737]	4.873250168	4.68833161	4.900596941	4.634109933	4.780905758	4.642565085	4.730840665	4.640615532	4.878255395	4.162091569	4.213763089	4.268616419	-0.539016268	0.000436376	0.003096083	-0.118944705	0.353123367	0.447753725	0.064408435	0.586330633	0.728169601	0.484479998	0.002293997	0.009884678	-0.05453627	0.702436661	0.766013823	0.603424703	6.59009E-05	0.000407989
ENSMUSG00000056050	Mia3		melanoma inhibitory activity 3 [Source:MGI Symbol;Acc:MGI:2443183]	6.279942423	6.516719091	6.363653473	6.667441352	6.717070746	6.847277451	6.594600792	6.490962423	6.755811967	6.583459585	6.488620359	6.55745038	-0.076723154	0.495638094	0.62137031	0.345378205	0.014269733	0.032988239	-0.20858221	0.095718905	0.219716957	0.21351915	0.100538334	0.190985714	0.136795995	0.339559647	0.428907178	-0.131859055	0.191751545	0.269480269
ENSMUSG00000072258	Taf1a		TATA-box binding protein associated factor, RNA polymerase I, A [Source:MGI Symbol;Acc:MGI:109578]	2.49355222	2.163177565	2.492832211	3.079296804	2.598998381	2.905583822	2.790103966	2.771542644	2.934880532	2.518546619	2.662285902	2.812994124	-0.181567321	0.299294443	0.432203576	0.442671653	0.040099577	0.076375821	-0.455003183	0.025339039	0.087848748	0.16923579	0.39326101	0.531748292	-0.012331531	0.955126854	0.966526958	-0.273435863	0.095573358	0.1505676
ENSMUSG00000039384	Dusp10	63953	dual specificity phosphatase 10 [Source:MGI Symbol;Acc:MGI:1927070]	2.397449074	1.009018747	1.133288274	1.366025257	2.198413615	2.401052045	1.78423306	1.703111752	1.591315658	2.519770443	3.014354516	2.360582928	1.005522431	0.021833847	0.060090434	0.59167393	0.199061542	0.282785861	-0.170958696	0.676049998	0.797460013	-0.584807198	0.204049973	0.327403814	0.420715234	0.405025011	0.493691976	-1.176481127	0.005396571	0.013908937
ENSMUSG00000039377	Hlx	15284	H2.0-like homeobox [Source:MGI Symbol;Acc:MGI:96109]	5.483614541	5.263403287	5.245108395	6.513647156	6.732959842	6.9406896	5.254418658	5.26491092	5.194507905	6.086853064	6.033419207	6.069497408	0.825323859	9.3494E-06	0.000169117	1.440511917	1.01177E-07	3.59474E-06	0.085216619	0.466190979	0.630115303	0.700404678	0.000101589	0.000882047	1.525728536	2.25539E-07	5.70708E-06	-0.740107239	7.73552E-06	8.27266E-05
ENSMUSG00000073481	Marc2	67247	mitochondrial amidoxime reducing component 2 [Source:MGI Symbol;Acc:MGI:1914497]	5.668358796	5.45522341	5.375037588	5.069681889	5.211813699	5.100244724	5.856242263	5.673316572	5.99156941	5.4678204	5.63611117	5.351984022	-0.328552536	0.027322836	0.071240396	-0.351087308	0.032389494	0.064087004	-0.341741981	0.029091583	0.096287493	-0.364276754	0.027576366	0.069754347	-0.692829289	0.001418769	0.004626318	-0.013189445	0.909934123	0.936078558
ENSMUSG00000039318	Rab3gap2	98732	RAB3 GTPase activating protein subunit 2 [Source:MGI Symbol;Acc:MGI:1916043]	6.20229107	6.043870585	6.25574733	5.888725453	6.104260344	6.058087986	6.351507099	6.405235267	6.303955028	6.497207568	6.340376689	6.556782806	0.095254909	0.39827584	0.533120077	-0.109633464	0.375398433	0.470077072	-0.203394225	0.102126014	0.229383119	-0.408282599	0.005589875	0.019664358	-0.313027689	0.042685163	0.077635806	-0.298649135	0.009142416	0.021414003
ENSMUSG00000026618	Iars2	381314	isoleucine-tRNA synthetase 2, mitochondrial [Source:MGI Symbol;Acc:MGI:1919586]	5.806940402	5.769759461	5.740241616	5.687046715	5.843883671	5.688588689	5.567663207	5.640772453	5.376843365	5.667214602	5.508276579	5.483976312	0.030006933	0.777867741	0.849138665	-0.017347204	0.882793231	0.911465148	0.248033575	0.044583855	0.13085969	0.200679438	0.108971987	0.203009584	0.230686372	0.107171785	0.166797047	0.218026642	0.036164612	0.066941877
ENSMUSG00000026617	Bpnt1	23827	bisphosphate 3'-nucleotidase 1 [Source:MGI Symbol;Acc:MGI:1338800]	3.957831766	4.198423516	4.06918545	4.636607095	4.828967645	4.638678715	4.453226994	4.613310294	4.195818199	5.076976776	4.943588946	4.940538255	0.566323592	0.001058913	0.005969384	0.632523296	0.001127562	0.004253079	-0.337244921	0.03031028	0.099104933	-0.271045217	0.088501268	0.172555736	0.295278375	0.099705586	0.157255904	-0.903568513	7.56773E-06	8.11899E-05
ENSMUSG00000026615	Eprs	107508	glutamyl-prolyl-tRNA synthetase [Source:MGI Symbol;Acc:MGI:97838]	6.367374826	6.485523077	6.542160473	7.525480418	7.261584345	7.301641031	6.099967976	6.141302399	6.138479605	6.804065453	6.889761341	6.934268847	0.741492496	9.59859E-06	0.000172573	0.860874489	5.25782E-06	6.32943E-05	0.337819647	0.006704159	0.033903957	0.457201641	0.001184563	0.005839419	1.198694137	8.40789E-07	1.44557E-05	-0.403672848	0.000546072	0.002162495
ENSMUSG00000039246	Lyplal1	226791	lysophospholipase-like 1 [Source:MGI Symbol;Acc:MGI:2385115]	2.380235294	2.532889621	2.212591782	0.257700511	1.901780042	1.894947214	1.564145316	1.486066601	1.546428734	2.294235619	1.903531778	2.13332433	0.562758469	0.065904393	0.139098121	-0.829120232	0.023966882	0.050279058	0.843510541	0.014594173	0.059561069	-0.54836816	0.111488623	0.206286621	0.014390309	0.968435713	0.976346643	0.280752072	0.283979903	0.371473523
ENSMUSG00000039239	Tgfb2	21808	transforming growth factor, beta 2 [Source:MGI Symbol;Acc:MGI:98726]	0.662520705	0.296571796	0.196800846	0.42583327	-0.339893139	0.559740543	-3.144029297	-1.655819412	-5.241377361	-2.19529373	-3.013858398	-2.710064995	0.664249854	0.4224322	0.553991138	-0.184373513	0.844725258	0.881941835	3.720071056	0.001021595	0.008508388	2.87144769	0.009840064	0.030801752	3.535697543	0.005600568	0.014357462	3.055821202	0.001414929	0.004637484
ENSMUSG00000001305	Rrp15	67223	ribosomal RNA processing 15 homolog (S. cerevisiae) [Source:MGI Symbol;Acc:MGI:1914473]	2.641513044	2.41411391	2.736037517	3.790119096	3.433036966	3.367134531	2.765844998	3.188786984	2.228812067	3.305231079	3.099716337	3.29370621	0.48484214	0.051485708	0.115491596	0.887734108	0.004875203	0.013745956	-0.135623696	0.5743327	0.7196095	0.267268272	0.313667117	0.451095762	0.752110412	0.023036533	0.046346636	-0.620465836	0.009911978	0.022861274
ENSMUSG00000039210	Gpatch2	67769	G patch domain containing 2 [Source:MGI Symbol;Acc:MGI:1915019]	4.7545536	4.569766802	4.529325132	4.344505715	4.436627015	4.398391443	4.580316028	4.548298136	4.573543391	4.755877955	5.049317191	4.781756944	0.318685422	0.022876734	0.062290002	-0.210376894	0.149328296	0.22441245	0.047975499	0.713259047	0.825166112	-0.481086818	0.004620221	0.01691281	-0.162401396	0.313991634	0.402062106	-0.270709924	0.028456824	0.054679559
ENSMUSG00000104394	Gm37254		predicted gene, 37254 [Source:MGI Symbol;Acc:MGI:5610482]	0.935667373	1.478244353	1.52970086	2.449988057	1.819133711	1.756370508	1.652311146	2.042402962	1.372093516	1.611135973	2.012213885	2.077864391	0.198900154	0.468714512	0.597538956	0.615371249	0.069607106	0.120241471	-0.387139785	0.194525685	0.355338701	0.02933131	0.925435061	0.953154201	0.228231464	0.51917121	0.603845148	-0.586039939	0.032986961	0.062102569
ENSMUSG00000026608	Kctd3	226823	potassium channel tetramerisation domain containing 3 [Source:MGI Symbol;Acc:MGI:2444629]	4.303112277	4.237569582	4.269702044	4.312759034	4.185045954	4.455017949	4.482721795	4.596160919	4.41352257	4.154999271	4.40864207	4.402520173	-0.176921471	0.163283069	0.275226543	0.048215683	0.725253668	0.786144191	-0.2339249	0.088040258	0.207614201	-0.008787746	0.948831848	0.967383753	-0.185709217	0.245603003	0.328764398	-0.057003429	0.600578954	0.681916046
ENSMUSG00000026605	Cenpf	108000	centromere protein F [Source:MGI Symbol;Acc:MGI:1313302]	3.088216572	3.168445614	2.793359014	1.68830431	2.103241286	2.072453102	0.437571891	0.382292925	0.423828317	0.912839195	1.388280636	0.903135826	0.699467424	0.007697929	0.027176524	-1.007211355	0.001895037	0.006506638	2.596832995	1.9382E-07	1.87732E-05	0.890154215	0.004294405	0.016037064	1.589621639	0.000134805	0.00068472	1.897365571	9.75728E-07	1.72417E-05
ENSMUSG00000026603	Smyd2	226830	SET and MYND domain containing 2 [Source:MGI Symbol;Acc:MGI:1915889]	2.057948967	1.770743816	2.554129042	2.211451748	1.824882086	1.661296305	1.094037041	1.233045117	1.167445377	0.776340088	0.980847125	1.393297723	-0.153560052	0.568966235	0.684513634	-0.310604413	0.327212768	0.421938859	0.974627969	0.004755189	0.026276485	0.817583608	0.020790547	0.055821855	0.664023556	0.075744009	0.125277389	1.128188021	0.000604022	0.002344689
ENSMUSG00000010175	Prox1	19130	prospero homeobox 1 [Source:MGI Symbol;Acc:MGI:97772]	4.329406615	4.463691777	4.492324189	6.677918793	4.813737439	5.167860921	4.489373138	4.528425089	4.514213067	4.386199605	4.180948983	4.207835842	-0.26077964	0.321665081	0.456136805	0.919529799	0.007792592	0.020054591	-0.082758605	0.760798424	0.857735084	1.097550834	0.002606312	0.010889291	0.836771195	0.024413643	0.048659158	0.178021035	0.443814693	0.535615821
ENSMUSG00000089872	Rps6kc1	320119	ribosomal protein S6 kinase polypeptide 1 [Source:MGI Symbol;Acc:MGI:2443419]	5.249600244	5.368372325	5.22772765	5.058549664	4.867432893	5.152458803	5.471075109	5.537792979	5.373068864	5.505007542	5.273106538	5.396025676	-0.079205139	0.492088769	0.618371522	-0.273890529	0.049758036	0.090916565	-0.172256624	0.170999377	0.325905246	-0.366942014	0.013182152	0.038707769	-0.446147153	0.009256784	0.021766289	-0.093051484	0.365620917	0.456188771
ENSMUSG00000026634	Angel2	52477	angel homolog 2 [Source:MGI Symbol;Acc:MGI:1196310]	6.050414741	6.043890356	5.950468676	5.381890094	5.432826133	5.236324935	5.851432624	5.795040318	5.850384072	5.634725626	5.766052107	5.52992569	-0.16809494	0.122007175	0.222139407	-0.665491714	8.92301E-05	0.000560138	0.189000674	0.101442164	0.228475121	-0.3083961	0.017953542	0.049643831	-0.47649104	0.003200983	0.009060321	0.357095614	0.001920175	0.005970249
ENSMUSG00000066595	Flvcr1	226844	feline leukemia virus subgroup C cellular receptor 1 [Source:MGI Symbol;Acc:MGI:2444881]	4.650320837	4.836464462	4.690692365	5.161328556	5.222653543	5.38875196	4.745627496	4.993309473	4.470155474	4.868989203	5.116536157	5.048031648	0.277808131	0.077848192	0.15821363	0.539712091	0.006288814	0.016820217	-0.008022886	0.958499034	0.977978495	0.253881075	0.141889788	0.248817588	0.531689205	0.013953689	0.0305123	-0.285831016	0.045813437	0.08163677
ENSMUSG00000026632	Tatdn3	68972	TatD DNase domain containing 3 [Source:MGI Symbol;Acc:MGI:1916222]	2.965695791	2.753051547	2.654342843	1.584406199	1.121405897	0.733134186	2.765962444	2.605991212	2.801288253	2.341429232	2.556967276	1.964934614	-0.383316061	0.104385368	0.19770295	-1.721088357	2.43725E-05	0.000205466	0.072250244	0.758018326	0.85577559	-1.265522052	0.00034218	0.002234869	-1.648838113	0.000100684	0.000547008	0.455566305	0.039597368	0.072341745
ENSMUSG00000062510	Nsl1	381318	NSL1, MIS12 kinetochore complex component [Source:MGI Symbol;Acc:MGI:2685830]	3.041714593	2.576138726	2.773483748	0.148535143	0.737051894	1.454166157	1.638126201	1.619999008	1.784007894	-0.000885233	0.348139829	0.580200991	-1.388170583	0.000337408	0.002544289	-1.895334671	8.60934E-05	0.000544631	1.119351351	0.002473015	0.016398626	0.612187263	0.077821896	0.156522626	-0.775983319	0.049465541	0.087829153	2.507521934	6.32696E-07	1.22924E-05
ENSMUSG00000026630	Batf3		basic leucine zipper transcription factor, ATF-like 3 [Source:MGI Symbol;Acc:MGI:1925491]	2.830438272	2.473094423	2.609051696	3.497445703	1.873166568	2.096032581	2.735161522	2.525736666	2.99736164	1.793662189	1.98325535	1.641999923	-0.917872275	0.0058176	0.021949513	-0.320328163	0.320497945	0.414867448	-0.114627133	0.694484434	0.810452476	0.482916979	0.145369154	0.253606466	-0.434955296	0.235066776	0.3172899	0.803245142	0.006945678	0.017080785
ENSMUSG00000026628	Atf3	11910	activating transcription factor 3 [Source:MGI Symbol;Acc:MGI:109384]	4.643757003	4.873748954	4.647141776	4.708294527	4.265489625	4.739505643	3.33985262	3.480039263	3.254887564	3.459712883	3.799411163	3.694138511	0.298044383	0.079201384	0.160061918	-0.179899911	0.324791697	0.419429793	1.36145387	4.23756E-06	0.000171763	0.883509577	0.000369075	0.002364939	1.18155396	9.09583E-05	0.000505639	1.063409487	9.26904E-06	9.4051E-05
ENSMUSG00000073478	D730003I15Rik		RIKEN cDNA D730003I15 gene [Source:MGI Symbol;Acc:MGI:1925971]	0.573327069	-0.406749543	0.44286591	-0.983924541	-1.420819298	-2.300888102	1.188998478	1.502116637	0.827297198	-1.490078613	-0.191141731	-0.966367662	-1.984299001	0.002287196	0.010694625	-1.927382774	0.006985433	0.018344355	-0.947041293	0.101566838	0.228644711	-0.890125066	0.155949473	0.268191393	-2.874424067	0.001040354	0.003572953	1.037257707	0.044389594	0.079654709
ENSMUSG00000037499	Nenf	66208	neuron derived neurotrophic factor [Source:MGI Symbol;Acc:MGI:1913458]	3.664894396	3.375902871	3.305891658	3.146822322	3.14449993	3.614757554	3.239447625	3.194677032	3.305258751	2.856450375	3.18360659	3.034611817	-0.207274324	0.23558938	0.361916141	-0.112863082	0.56007999	0.643718972	0.196653793	0.283206822	0.456046037	0.291065036	0.150054935	0.260147654	0.083790712	0.700097779	0.763943001	0.403928117	0.019773848	0.040468222
ENSMUSG00000026627	Pacc1		proton activated chloride channel 1 [Source:MGI Symbol;Acc:MGI:1914200]	6.852487484	6.937000768	6.712997752	5.110545971	5.673974983	5.638994092	7.063502289	7.011650312	7.031724854	6.47516393	6.449791457	6.358150636	-0.596197861	0.000452452	0.003179291	-1.304670326	8.3541E-07	1.65793E-05	-0.182146884	0.180018864	0.337351423	-0.890619348	3.25487E-05	0.000373074	-1.486817209	9.42248E-07	1.57518E-05	0.414050978	0.002352437	0.007032506
ENSMUSG00000026626	Ppp2r5a	226849	protein phosphatase 2, regulatory subunit B', alpha [Source:MGI Symbol;Acc:MGI:2388479]	5.991705359	5.653267082	5.808587286	6.049160712	5.854199305	5.936545603	6.018944274	6.002853637	6.041800277	5.792341255	5.907135202	5.855970552	-0.165208996	0.156046083	0.266701335	0.128337886	0.306257246	0.399748723	-0.224175655	0.075703701	0.187431085	0.069371227	0.574015003	0.695708989	-0.095837769	0.499282513	0.584677794	-0.058966659	0.548215743	0.633700541
ENSMUSG00000037474	Dtl	76843	denticleless E3 ubiquitin protein ligase [Source:MGI Symbol;Acc:MGI:1924093]	2.734290073	2.110724472	2.988705973	-0.02148042	0.37752192	1.064300397	-1.312925315	-1.57953702	-0.418371454	-1.527666643	0.293419061	0.486425995	0.851205554	0.171872125	0.285843117	-2.062090482	0.01117048	0.027077353	3.732307534	8.04988E-05	0.001352223	0.819011498	0.253154447	0.385057904	1.670217052	0.049264682	0.087494881	2.88110198	0.000207904	0.00100564
ENSMUSG00000037461	Ints7	77065	integrator complex subunit 7 [Source:MGI Symbol;Acc:MGI:1924315]	5.197679465	5.118293415	5.128328488	5.085285809	5.212024109	5.303294243	4.887476614	4.83968445	4.936579656	5.161523378	5.053927558	5.136175694	0.22387093	0.03112228	0.078609222	0.073758711	0.482193087	0.574053164	0.258345347	0.020596703	0.076037577	0.108233129	0.30901988	0.445830738	0.332104059	0.015020501	0.03237266	0.034474418	0.676305678	0.74898266
ENSMUSG00000026623	Lpgat1	226856	lysophosphatidylglycerol acyltransferase 1 [Source:MGI Symbol;Acc:MGI:2446186]	6.43753745	6.510154677	6.551882692	5.355702408	5.888854114	5.875500015	6.38841108	6.377462809	6.455439337	5.915373255	5.91179447	6.068932213	-0.454450119	0.002255224	0.010602223	-0.732237026	0.000117513	0.00069675	0.092408691	0.460946063	0.625765925	-0.185378216	0.169882516	0.286009218	-0.639828335	0.001038272	0.003569387	0.54685881	0.000202508	0.000987009
ENSMUSG00000026622	Nek2	18005	NIMA (never in mitosis gene a)-related expressed kinase 2 [Source:MGI Symbol;Acc:MGI:109359]	2.243605884	2.340931983	1.738316183	0.012122119	2.004849382	1.356497946	-2.495689935	-5.25180758	0.76147837	1.323282683	0.84754929	0.539487334	3.292038261	0.011366103	0.036584314	-0.791845176	0.543149497	0.629678112	4.460305715	0.002488641	0.016447291	0.376422278	0.771658486	0.850748911	3.668460539	0.02447502	0.048767495	1.168267454	0.262239129	0.348048722
ENSMUSG00000037434	Slc30a1	22782	solute carrier family 30 (zinc transporter), member 1 [Source:MGI Symbol;Acc:MGI:1345281]	5.193344501	5.527430312	5.084617082	5.074202463	5.778378437	5.968228165	5.015491718	4.967169804	4.947134551	6.041555644	5.597507592	5.729416295	0.808166852	0.001556138	0.008041047	0.407665868	0.084795961	0.141228328	0.320406498	0.145083325	0.291805059	-0.080094486	0.716992456	0.809747827	0.728072367	0.012919656	0.028629742	-0.487760354	0.015710156	0.033406626
ENSMUSG00000026637	Traf5	22033	TNF receptor-associated factor 5 [Source:MGI Symbol;Acc:MGI:107548]	4.8703392	4.753330967	4.786124192	3.837891359	4.213194016	4.290380001	5.082525118	5.076906693	5.074867104	5.836355699	5.741457741	5.858450779	0.726342948	2.24059E-05	0.000330077	-0.637585704	0.000185258	0.000997132	-0.278456392	0.027116177	0.091718803	-1.642385044	2.08271E-08	3.04558E-06	-0.916042097	2.43452E-05	0.000176676	-1.00479934	3.00143E-07	6.72805E-06
ENSMUSG00000103653	Gstp-ps		glutathione S-transferase, pi, pseudogene [Source:MGI Symbol;Acc:MGI:3782108]	1.802583122	1.846270316	1.823828189	1.611216122	1.797808164	1.571943739	1.83775473	1.955457658	1.592087648	1.870109881	1.459496446	1.563223984	-0.17440222	0.372904123	0.508379202	-0.159783475	0.47593279	0.568304824	0.031520176	0.876726836	0.930371186	0.046138921	0.835196325	0.893350102	-0.128263299	0.607437204	0.683502158	0.205922396	0.251591587	0.336294653
ENSMUSG00000037395	Rcor3	214742	REST corepressor 3 [Source:MGI Symbol;Acc:MGI:2441920]	4.365904333	4.551956557	4.492320268	2.488872979	3.216720075	3.03374239	4.718837622	4.629463023	4.912981924	3.443272116	3.896909905	3.78576703	-1.035325623	0.00010028	0.001034984	-1.485824015	1.19995E-05	0.000117891	-0.282955194	0.153419516	0.30257012	-0.733453586	0.003508945	0.013734539	-1.768779209	7.38647E-06	7.04274E-05	0.752370429	0.000546809	0.002164178
ENSMUSG00000037375	Hhat	226861	hedgehog acyltransferase [Source:MGI Symbol;Acc:MGI:2444681]	3.138139535	3.629637067	3.18025009	3.778826891	3.909384954	4.720206065	3.285511076	3.33300651	3.325848624	3.632522029	3.552832891	3.81266556	0.327210926	0.139488234	0.24577179	0.876909985	0.003159918	0.009737707	0.002638862	0.990501649	0.995373908	0.552337921	0.037534856	0.088921252	0.879548847	0.006598437	0.016492532	-0.324572064	0.105724929	0.163719844
ENSMUSG00000016181	Utp25	215193	UTP25 small subunit processome component [Source:MGI Symbol;Acc:MGI:2138080]	4.70621058	4.830869479	4.736934452	4.339572539	4.815241982	4.593267107	5.075723225	5.074158895	5.051966573	4.811523409	4.950092889	4.838083978	-0.190429363	0.107656589	0.202322151	-0.133801309	0.296539743	0.389885493	-0.303525398	0.022742263	0.081658184	-0.246897344	0.068396772	0.141837282	-0.437326707	0.009178452	0.021629696	-0.113096035	0.266845376	0.352881101
ENSMUSG00000079144	A130010J15Rik	319266	RIKEN cDNA A130010J15 gene [Source:MGI Symbol;Acc:MGI:2441776]	2.838137592	3.576612285	3.273338423	2.287706945	2.575149539	1.768106295	3.758259243	3.789510902	3.699143812	3.134175318	3.404854299	3.052593699	-0.523768963	0.041037689	0.097103659	-1.045381214	0.001882381	0.006474385	-0.507969144	0.056920537	0.155229701	-1.029581395	0.00211077	0.009232625	-1.553350357	0.000234662	0.001066729	0.015799819	0.939413943	0.957190736
ENSMUSG00000037318	Traf3ip3	215243	TRAF3 interacting protein 3 [Source:MGI Symbol;Acc:MGI:2441706]	5.553209908	5.42894473	5.486647425	3.645600057	3.974987791	3.867430623	5.347421758	5.354299806	5.291127258	4.844640619	4.748588719	4.790769073	-0.537515008	0.000161754	0.001479316	-1.621644267	1.09883E-08	8.95949E-07	0.156694951	0.150367193	0.298627741	-0.927434308	3.2491E-06	7.64641E-05	-1.464949316	1.20138E-07	3.63608E-06	0.694209959	5.57E-06	6.4055E-05
ENSMUSG00000016494	Cd34	12490	CD34 antigen [Source:MGI Symbol;Acc:MGI:88329]	8.7742342	8.930274136	8.736307322	8.119839636	8.628903215	8.814472836	7.836475098	7.935031299	7.654060097	7.806551288	7.570365965	7.723835701	-0.116023128	0.454009729	0.583385103	-0.247071878	0.155576101	0.231696312	1.026742531	4.16399E-05	0.000831301	0.895693781	0.00018541	0.001393034	0.779670652	0.001601329	0.005110395	1.142765659	2.55182E-06	3.53439E-05
ENSMUSG00000096929	A330023F24Rik		RIKEN cDNA A330023F24 gene [Source:MGI Symbol;Acc:MGI:2443958]	0.93733698	1.149604129	1.158630514	2.775975351	2.796117805	2.682580628	1.845235255	1.758152755	2.093751597	2.904036295	3.470971542	3.311316237	1.343109721	3.26745E-05	0.000442843	1.662078607	1.62836E-05	0.000150207	-0.820594527	0.00252888	0.016649858	-0.501625642	0.050970158	0.112967044	0.84148408	0.007446515	0.018196992	-2.163704248	1.16723E-07	3.35717E-06
ENSMUSG00000104525	Gm37334		predicted gene, 37334 [Source:MGI Symbol;Acc:MGI:5610562]	-3.71650008	-1.504982763	-1.21941105	1.365701694	0.882734482	-0.134622699	-0.300695478	-0.471103947	0.634528996	0.71422395	0.899846745	1.959898426	1.137672008	0.134261255	0.239120902	2.708942165	0.006855343	0.018053918	-2.12949192	0.015243519	0.061352632	-0.558221762	0.509504199	0.640618009	0.579450246	0.538182621	0.621120958	-3.267163927	0.000343002	0.001475226
ENSMUSG00000103867	9630010A21Rik		RIKEN cDNA 9630010A21 gene [Source:MGI Symbol;Acc:MGI:2442787]	-0.876399792	-1.425228505	-1.77202271	0.08540594	-0.586957718	0.51520525	-0.562274827	-0.413974082	-0.869941919	0.63712367	1.040213698	0.553362457	1.403265103	0.005094879	0.01981954	1.387561063	0.012645265	0.029929838	-0.747186347	0.106042738	0.235202788	-0.762890387	0.131236948	0.234307118	0.640374716	0.244969366	0.32813754	-2.15045145	0.00010698	0.000602171
ENSMUSG00000016493	Cd46	17221	CD46 antigen, complement regulatory protein [Source:MGI Symbol;Acc:MGI:1203290]	1.114737326	0.834735247	1.638585282	1.425175588	1.02970326	-0.264555128	-0.024510222	-0.919531399	1.162568877	1.770088566	1.521115185	1.607456022	1.559194569	0.008519711	0.02933957	-0.659060938	0.269759861	0.360795187	1.161043978	0.045527121	0.132786638	-1.057211529	0.089783845	0.17457074	0.50198304	0.44453298	0.533101879	-0.398150591	0.389413063	0.480309533
ENSMUSG00000016481	Cr1l	12946	complement component (3b/4b) receptor 1-like [Source:MGI Symbol;Acc:MGI:88513]	6.449418781	6.606249317	6.517771238	6.674479077	6.817281776	6.796395206	6.669583838	6.726137005	6.598615181	6.557494911	6.59629359	6.576393094	-0.086953314	0.355915048	0.492026256	0.242469418	0.031431454	0.062502972	-0.127891285	0.204647189	0.367925295	0.201531447	0.065779033	0.137766067	0.114578133	0.334501015	0.42352243	-0.040937971	0.612435027	0.693281242
[truncated: 13,011 more rows]
