# Supplementary material for: Epigenetic regulation of innate immune memory in microglia
Source: J Neuroinflammation. 2022 May 14;19:111. doi: 10.1186/s12974-022-02463-5 (PMC9107649; doi:10.1186/s12974-022-02463-5)
Supplement: Supplementary file 8 — Additional file 8: Genes and associated gene ontology terms for each cluster identified in the priming mouse model (related to Figs. 2 and S3). [file 12974_2022_2463_MOESM8_ESM.xlsx]

## Sheet: cluster 1
ID	Description	GeneRatio	BgRatio	pvalue	p.adjust	qvalue	geneID	Count
GO:0006954	inflammatory response	54/479	411/11002	2.00307e-13	2.00307e-13	6.31917e-10	Socs3/Ptgs2/Zfp36/Ier3/C5ar1/Il1b/Kdm6b/Sbno2/Il4ra/Jun/Osm/Nfkbia/Sphk1/Icam1/Notch1/Map2k3/Myd88/Ticam1/Stat3/Tgm2/B4galt1/F3/Tnf/Nfkbiz/Casp4/Slamf1/Cebpb/Il17ra/Rbpj/Tirap/Rela/Il1a/Rabgef1/Zc3h12a/Cx3cl1/Serpine1/Per1/Ncf1/Siglece/Fcgr3/Trem1/Cxcl2/Cxcl1/Nlrx1/Nfkbid/Trpv4/Ccr7/Adora2a/Rel/Il6/Sema7a/Ctla2a/Metrnl/Tyro3	54
GO:0042107	cytokine metabolic process	23/479	85/11002	8.24523e-13	8.24523e-13	1.30058e-09	Zfp36/Il1b/Bcl3/Gadd45g/Egr1/Map2k3/Myd88/Ticam1/Stat3/Tnf/Klf4/Irf1/Cebpb/Tirap/Rela/Il1a/Fcgr3/Errfi1/Trem1/Traf6/Rel/Il6/S100b	23
GO:0001817	regulation of cytokine production	56/479	465/11002	2.66878e-12	2.66878e-12	2.80644e-09	Arid5a/Ptgs2/Zfp36/C5ar1/Il1b/Bcl3/Egr1/Cd83/Runx1/Il4ra/Cgas/Osm/Sphk1/Abl2/Map2k3/Myd88/Srgn/Ticam1/Stat3/Atf4/Tnf/Litaf/Klf4/Casp4/Irf1/Slamf1/Cebpb/Il17ra/Polr3d/Tirap/Jak3/Rela/Xbp1/Ddx21/Il1a/Ripk1/Rabgef1/Zc3h12a/Cx3cl1/Flot1/Serpine1/Per1/Fcgr3/Errfi1/Traf6/Nlrx1/Cd300ld/Trpv4/Ccr7/Rel/Il6/Sema7a/Prnp/Mapk11/Clec4n/S100b	56
GO:0042089	cytokine biosynthetic process	22/479	84/11002	5.36062e-12	5.36062e-12	4.19158e-09	Zfp36/Il1b/Bcl3/Gadd45g/Egr1/Map2k3/Myd88/Ticam1/Stat3/Tnf/Klf4/Irf1/Cebpb/Tirap/Rela/Il1a/Fcgr3/Errfi1/Traf6/Rel/Il6/S100b	22
GO:0042035	regulation of cytokine biosynthetic process	21/479	77/11002	6.999e-12	6.999e-12	4.19158e-09	Zfp36/Il1b/Bcl3/Egr1/Map2k3/Myd88/Ticam1/Stat3/Tnf/Klf4/Irf1/Cebpb/Tirap/Rela/Il1a/Fcgr3/Errfi1/Traf6/Rel/Il6/S100b	21
GO:0001819	positive regulation of cytokine production	43/479	307/11002	7.97197e-12	7.97197e-12	4.19158e-09	Arid5a/Ptgs2/C5ar1/Il1b/Bcl3/Egr1/Cd83/Runx1/Il4ra/Cgas/Osm/Sphk1/Abl2/Myd88/Ticam1/Stat3/Atf4/Tnf/Casp4/Irf1/Slamf1/Cebpb/Il17ra/Polr3d/Tirap/Rela/Xbp1/Ddx21/Il1a/Ripk1/Cx3cl1/Flot1/Serpine1/Fcgr3/Traf6/Nlrx1/Trpv4/Ccr7/Rel/Il6/Sema7a/Mapk11/Clec4n	43
GO:0043408	regulation of MAPK cascade	54/479	460/11002	1.85526e-11	1.85526e-11	8.36123e-09	Dusp1/C5ar1/Il1b/Gadd45g/Gcnt2/Dusp8/Jun/Osm/Dusp5/Sphk1/Icam1/Notch1/Abl2/Map2k3/Myd88/Tnf/Klf4/Slamf1/Fas/Ptpn1/Dusp16/Gadd45b/Tirap/Hmgcr/Xbp1/Trib1/Il1a/Sema4c/Ripk1/Zc3h12a/Cx3cl1/Gadd45a/Per1/Dusp2/Ncf1/Errfi1/P2ry6/Traf6/Paqr3/Grm4/Unc5cl/Id1/Trpv4/Ccr7/Grik2/Dnajc27/Il6/Sema7a/Map3k6/Wnk2/Dok2/Mapk8ip2/Lpar2/Spry4	54
GO:0050727	regulation of inflammatory response	33/479	220/11002	3.91242e-10	3.91242e-10	1.54283e-07	Socs3/Ptgs2/Zfp36/Ier3/Il1b/Sbno2/Osm/Nfkbia/Sphk1/Myd88/Ticam1/Tgm2/Tnf/Nfkbiz/Cebpb/Il17ra/Rela/Rabgef1/Zc3h12a/Cx3cl1/Serpine1/Per1/Siglece/Fcgr3/Nlrx1/Trpv4/Ccr7/Adora2a/Il6/Sema7a/Ctla2a/Metrnl/Tyro3	33
GO:0051403	stress-activated MAPK cascade	29/479	188/11002	2.40608e-09	2.40608e-09	8.40891e-07	Dusp1/Zfp36/Il1b/Gadd45g/Sphk1/Map2k3/Myd88/Tnf/Slamf1/Fas/Ptpn1/Gadd45b/Tirap/Hmgcr/Trib1/Il1a/Sema4c/Ripk1/Zc3h12a/Gadd45a/Per1/Ncf1/Traf6/Unc5cl/Trpv4/Ccr7/Grik2/Mapk11/Mapk8ip2	29
GO:0007249	I-kappaB kinase/NF-kappaB signaling	26/479	155/11002	2.66549e-09	2.66549e-09	8.40891e-07	Il1b/Bcl3/Nfkbia/Abl2/Myd88/Ticam1/Tgm2/Tnf/Irf1/Tirap/Rela/Ddx21/Il1a/Ripk1/Zc3h12a/Cx3cl1/Per1/Traf6/Unc5cl/Nlrx1/Nfkbid/Pim2/Rel/Clec4n/S100b/Erc1	26
GO:0031098	stress-activated protein kinase signaling cascade	31/479	215/11002	3.6151e-09	3.6151e-09	1.03679e-06	Dusp1/Zfp36/Il1b/Gadd45g/Map3k8/Sphk1/Map2k3/Myd88/Tnf/Slamf1/Fas/Ptpn1/Gadd45b/Tirap/Hmgcr/Trib1/Il1a/Sema4c/Ripk1/Zc3h12a/Gadd45a/Per1/Ncf1/Errfi1/Traf6/Unc5cl/Trpv4/Ccr7/Grik2/Mapk11/Mapk8ip2	31
GO:0042108	positive regulation of cytokine biosynthetic process	15/479	54/11002	5.56e-09	5.56e-09	1.46169e-06	Il1b/Bcl3/Egr1/Myd88/Ticam1/Stat3/Tnf/Irf1/Tirap/Rela/Il1a/Fcgr3/Traf6/Rel/Il6	15
GO:0032496	response to lipopolysaccharide	28/479	184/11002	6.22887e-09	6.22887e-09	1.51157e-06	Arid5a/Ptgs2/Zfp36/Junb/Il1b/Sbno2/Jun/Nfkbia/Myd88/Ticam1/Tnf/Litaf/Cebpb/Tirap/Rela/Xbp1/Trib1/Jund/Zc3h12a/Cx3cl1/Serpine1/Gch1/Traf6/Cxcl2/Cxcl1/Ccr7/Il6/Adm	28
GO:0002521	leukocyte differentiation	43/479	381/11002	8.07348e-09	8.07348e-09	1.70995e-06	Id2/Junb/Il1b/Bcl3/Gadd45g/Fos/Egr1/Cd83/Sbno2/Runx1/Il4ra/Jun/Abl2/Lfng/Klf10/Stat3/Tnf/Nfkbiz/Irf1/Slamf1/Fas/Cebpb/Rbpj/Myc/Irf2bp2/Cd300lf/Srf/Jak3/Xbp1/Trib1/Ripk1/Zc3h12a/Hsp90aa1/Traf6/Nfkbid/Ccr7/Tfrc/Il6/Ocstamp/Ctla2a/Lck/Tyro3/Dll4	43
GO:0002237	response to molecule of bacterial origin	29/479	198/11002	8.1304e-09	8.1304e-09	1.70995e-06	Arid5a/Ptgs2/Zfp36/Junb/C5ar1/Il1b/Sbno2/Jun/Nfkbia/Myd88/Ticam1/Tnf/Litaf/Cebpb/Tirap/Rela/Xbp1/Trib1/Jund/Zc3h12a/Cx3cl1/Serpine1/Gch1/Traf6/Cxcl2/Cxcl1/Ccr7/Il6/Adm	29
GO:0023061	signal release	48/479	457/11002	1.0997e-08	1.0997e-08	2.1683e-06	Arid5a/Il1b/Runx1/Il4ra/Osm/Midn/Sphk1/Notch1/Abl2/Srgn/Tnf/Casp4/Slamf1/Ildr1/Il17ra/Rbpj/Irs2/Hmgcr/Xbp1/Bcl2l1/Il1a/Tcf7l2/Rabgef1/Pim3/Ucp2/Zc3h12a/Cx3cl1/Fcgr3/Trem1/Grm4/Trpv4/Ccr7/Klf7/Adora2a/Syt2/Trim9/Syp/Il6/Rims2/Kalrn/Sptbn2/Adcy5/Mapk11/Syt1/Clec4n/Adm/Grik5/Erc1	48
GO:0033002	muscle cell proliferation	24/479	151/11002	3.25439e-08	3.25439e-08	6.03926e-06	Pim1/Id2/Ptgs2/Egr1/Jun/Notch1/Myd88/Stat3/Tgm2/Tnf/Klf4/Rbpj/Myc/Adamts1/Hmgcr/Trib1/Ripk1/Tcf7l2/Cx3cl1/P2ry6/Traf6/Il6/Kalrn/Mapk11	24
GO:1902107	positive regulation of leukocyte differentiation	21/479	120/11002	4.28995e-08	4.28995e-08	7.5187e-06	Id2/Il1b/Fos/Cd83/Runx1/Il4ra/Jun/Klf10/Tnf/Nfkbiz/Irf1/Xbp1/Trib1/Ripk1/Hsp90aa1/Traf6/Nfkbid/Ccr7/Il6/Ocstamp/Lck	21
GO:0043410	positive regulation of MAPK cascade	37/479	319/11002	4.58402e-08	4.58402e-08	7.61126e-06	C5ar1/Il1b/Gadd45g/Gcnt2/Jun/Osm/Sphk1/Icam1/Notch1/Abl2/Map2k3/Myd88/Tnf/Slamf1/Ptpn1/Gadd45b/Tirap/Hmgcr/Il1a/Sema4c/Ripk1/Zc3h12a/Cx3cl1/Gadd45a/Ncf1/P2ry6/Traf6/Grm4/Unc5cl/Trpv4/Ccr7/Dnajc27/Il6/Sema7a/Map3k6/Mapk8ip2/Lpar2	37
GO:0042326	negative regulation of phosphorylation	38/479	338/11002	6.90043e-08	6.90043e-08	1.08845e-05	Socs3/Dusp1/Ier3/Il1b/Gadd45g/Dusp8/Jun/Dusp5/Midn/Stat3/Pde12/Klf4/Irf1/Ppp1r15b/Ptpn1/Irs2/Dusp16/Gadd45b/Hmgcr/Xbp1/Trib1/Rabgef1/Zc3h12a/Gadd45a/Per1/Dusp2/Ppp1r15a/Errfi1/Cdkn2d/Paqr3/Adora2a/Inpp5j/Il6/Prnp/Wnk2/Dok2/Pkia/Spry4	38
GO:0032874	positive regulation of stress-activated MAPK cascade	21/479	124/11002	7.73953e-08	7.73953e-08	1.16267e-05	Il1b/Gadd45g/Sphk1/Myd88/Tnf/Slamf1/Ptpn1/Gadd45b/Tirap/Hmgcr/Il1a/Sema4c/Ripk1/Zc3h12a/Gadd45a/Ncf1/Traf6/Unc5cl/Trpv4/Ccr7/Mapk8ip2	21
GO:0031347	regulation of defense response	41/479	383/11002	8.15435e-08	8.15435e-08	1.16931e-05	Socs3/Ptgs2/Zfp36/Ier3/Il1b/Sbno2/Cgas/Osm/Nfkbia/Sphk1/Pvr/Myd88/Ticam1/Tgm2/Tnf/Nfkbiz/Irf1/Cebpb/Il17ra/Polr3d/Tirap/Rela/Rabgef1/Zc3h12a/Cx3cl1/Serpine1/Per1/Siglece/Fcgr3/Cxcl1/Nlrx1/Trpv4/Ccr7/Adora2a/H60b/Il6/Sema7a/Ctla2a/Metrnl/Lrp8/Tyro3	41
GO:0070304	positive regulation of stress-activated protein kinase signaling cascade	21/479	125/11002	8.93265e-08	8.93265e-08	1.20922e-05	Il1b/Gadd45g/Sphk1/Myd88/Tnf/Slamf1/Ptpn1/Gadd45b/Tirap/Hmgcr/Il1a/Sema4c/Ripk1/Zc3h12a/Gadd45a/Ncf1/Traf6/Unc5cl/Trpv4/Ccr7/Mapk8ip2	21
GO:0032872	regulation of stress-activated MAPK cascade	25/479	171/11002	9.19926e-08	9.19926e-08	1.20922e-05	Dusp1/Il1b/Gadd45g/Sphk1/Myd88/Tnf/Slamf1/Fas/Ptpn1/Gadd45b/Tirap/Hmgcr/Il1a/Sema4c/Ripk1/Zc3h12a/Gadd45a/Per1/Ncf1/Traf6/Unc5cl/Trpv4/Ccr7/Grik2/Mapk8ip2	25
GO:1903708	positive regulation of hemopoiesis	23/479	148/11002	9.67527e-08	9.67527e-08	1.22092e-05	Id2/Il1b/Fos/Cd83/Runx1/Il4ra/Jun/Klf10/Stat3/Tnf/Nfkbiz/Irf1/Xbp1/Trib1/Ripk1/Hsp90aa1/Traf6/Cxcl1/Nfkbid/Ccr7/Il6/Ocstamp/Lck	23
GO:0043123	positive regulation of I-kappaB kinase/NF-kappaB signaling	17/479	85/11002	1.12429e-07	1.12429e-07	1.35536e-05	Il1b/Abl2/Myd88/Ticam1/Tgm2/Tnf/Tirap/Rela/Ddx21/Il1a/Ripk1/Cx3cl1/Traf6/Unc5cl/Pim2/Clec4n/S100b	17
GO:0070302	regulation of stress-activated protein kinase signaling cascade	25/479	173/11002	1.15999e-07	1.15999e-07	1.35536e-05	Dusp1/Il1b/Gadd45g/Sphk1/Myd88/Tnf/Slamf1/Fas/Ptpn1/Gadd45b/Tirap/Hmgcr/Il1a/Sema4c/Ripk1/Zc3h12a/Gadd45a/Per1/Ncf1/Traf6/Unc5cl/Trpv4/Ccr7/Grik2/Mapk8ip2	25
GO:0071219	cellular response to molecule of bacterial origin	22/479	139/11002	1.32147e-07	1.32147e-07	1.44515e-05	Arid5a/Zfp36/Il1b/Sbno2/Nfkbia/Myd88/Ticam1/Tnf/Litaf/Cebpb/Tirap/Rela/Xbp1/Trib1/Zc3h12a/Cx3cl1/Serpine1/Gch1/Traf6/Cxcl2/Cxcl1/Il6	22
GO:0007268	chemical synaptic transmission	42/479	405/11002	1.37427e-07	1.37427e-07	1.44515e-05	Ptgs2/Il1b/Egr1/Sphk1/Srgn/Stat3/Tnf/Slc12a7/Srf/Xbp1/Bcl2l1/Homer1/Slc1a3/Cx3cl1/Sez6/Flot1/Grin2c/Grin1/Gabrd/Grm4/Nptx1/Syne1/Shank1/Adora2a/Grik2/Atp2b2/Syt2/Trim9/Syp/Rims2/Kalrn/Map1a/Prnp/Sptbn2/Nedd4/Syt1/Lrp8/Mapk8ip2/Ptprd/Grik5/S100b/Erc1	42
GO:0098916	anterograde trans-synaptic signaling	42/479	405/11002	1.37427e-07	1.37427e-07	1.44515e-05	Ptgs2/Il1b/Egr1/Sphk1/Srgn/Stat3/Tnf/Slc12a7/Srf/Xbp1/Bcl2l1/Homer1/Slc1a3/Cx3cl1/Sez6/Flot1/Grin2c/Grin1/Gabrd/Grm4/Nptx1/Syne1/Shank1/Adora2a/Grik2/Atp2b2/Syt2/Trim9/Syp/Rims2/Kalrn/Map1a/Prnp/Sptbn2/Nedd4/Syt1/Lrp8/Mapk8ip2/Ptprd/Grik5/S100b/Erc1	42
GO:1903706	regulation of hemopoiesis	33/479	278/11002	1.45033e-07	1.45033e-07	1.46856e-05	Pim1/Id2/Zfp36/Il1b/Fos/Cd83/Runx1/Il4ra/Jun/Nfkbia/Notch1/Klf10/Stat3/Tnf/Nfkbiz/Irf1/Fas/Cebpb/Myc/Jak3/Xbp1/Trib1/Ripk1/Zc3h12a/Hsp90aa1/Traf6/Cxcl1/Nfkbid/Ccr7/Il6/Ocstamp/Ctla2a/Lck	33
GO:0033993	response to lipid	43/479	421/11002	1.48963e-07	1.48963e-07	1.46856e-05	Pim1/Fosl2/Arid5a/Ptgs2/Zfp36/Junb/Il1b/Sbno2/Runx1/Jun/Nfkbia/Abl2/Myd88/Ticam1/Stat3/Tnf/Litaf/Klf4/Fas/Cebpb/Socs2/Insig1/Tirap/Rela/Xbp1/Trib1/Jund/Paqr8/Zc3h12a/Cx3cl1/Serpine1/Gch1/Per1/P2ry6/Cdkn2d/Traf6/Cxcl2/Cxcl1/Ccr7/Gramd1a/Il6/Adcy5/Adm	43
GO:0099536	synaptic signaling	43/479	423/11002	1.70252e-07	1.70252e-07	1.62758e-05	Ptgs2/Il1b/Egr1/Sphk1/Srgn/Stat3/Tnf/Slc12a7/Srf/Rela/Xbp1/Bcl2l1/Homer1/Slc1a3/Cx3cl1/Sez6/Flot1/Grin2c/Grin1/Gabrd/Grm4/Nptx1/Syne1/Shank1/Adora2a/Grik2/Atp2b2/Syt2/Trim9/Syp/Rims2/Kalrn/Map1a/Prnp/Sptbn2/Nedd4/Syt1/Lrp8/Mapk8ip2/Ptprd/Grik5/S100b/Erc1	43
GO:0009612	response to mechanical stimulus	16/479	78/11002	1.83946e-07	1.83946e-07	1.67619e-05	Junb/Fos/Jun/Nfkbia/Abl2/Tnf/Myc/Rela/Jund/Slc1a3/Atp2b2/Cnn2/Kalrn/Pkd1l3/Ryr2/Lck	16
GO:0050755	chemokine metabolic process	7/479	12/11002	1.85964e-07	1.85964e-07	1.67619e-05	Il1b/Egr1/Myd88/Ticam1/Tnf/Trem1/Il6	7
GO:0043122	regulation of I-kappaB kinase/NF-kappaB signaling	21/479	131/11002	2.04361e-07	2.04361e-07	1.75799e-05	Il1b/Abl2/Myd88/Ticam1/Tgm2/Tnf/Tirap/Rela/Ddx21/Il1a/Ripk1/Zc3h12a/Cx3cl1/Per1/Traf6/Unc5cl/Nlrx1/Nfkbid/Pim2/Clec4n/S100b	21
GO:1902105	regulation of leukocyte differentiation	27/479	203/11002	2.06184e-07	2.06184e-07	1.75799e-05	Id2/Il1b/Fos/Cd83/Runx1/Il4ra/Jun/Klf10/Tnf/Nfkbiz/Irf1/Fas/Cebpb/Myc/Jak3/Xbp1/Trib1/Ripk1/Zc3h12a/Hsp90aa1/Traf6/Nfkbid/Ccr7/Il6/Ocstamp/Ctla2a/Lck	27
GO:0099537	trans-synaptic signaling	42/479	412/11002	2.20891e-07	2.20891e-07	1.79275e-05	Ptgs2/Il1b/Egr1/Sphk1/Srgn/Stat3/Tnf/Slc12a7/Srf/Xbp1/Bcl2l1/Homer1/Slc1a3/Cx3cl1/Sez6/Flot1/Grin2c/Grin1/Gabrd/Grm4/Nptx1/Syne1/Shank1/Adora2a/Grik2/Atp2b2/Syt2/Trim9/Syp/Rims2/Kalrn/Map1a/Prnp/Sptbn2/Nedd4/Syt1/Lrp8/Mapk8ip2/Ptprd/Grik5/S100b/Erc1	42
GO:0009617	response to bacterium	39/479	368/11002	2.23289e-07	2.23289e-07	1.79275e-05	Arid5a/Ptgs2/Zfp36/Junb/C5ar1/Il1b/Bcl3/Sbno2/Mt2/Jun/Nfkbia/Myd88/Ticam1/Tnf/Litaf/Cebpb/Rbpj/Tirap/Rela/Xbp1/Trib1/Jund/Lrg1/Zc3h12a/Cx3cl1/Gbp7/Serpine1/Gch1/Ncf1/Trem1/Traf6/Cxcl2/Cxcl1/Ccr7/Snhg1/Rgs1/Il6/Adamts4/Adm	39
GO:0051480	regulation of cytosolic calcium ion concentration	25/479	179/11002	2.27309e-07	2.27309e-07	1.79275e-05	C5ar1/Il1b/Marcksl1/Abl2/Tgm2/Jak3/Cx3cl1/Gpr65/Gna13/Grin2c/P2ry6/Grin1/Cxcl2/Cxcl1/Trpv4/Ccr7/Atp2b2/Cxcr5/Plch2/Prnp/Cacna2d1/Adcy5/Ryr2/Adm/Lck	25
GO:0071222	cellular response to lipopolysaccharide	21/479	132/11002	2.33369e-07	2.33369e-07	1.79565e-05	Arid5a/Zfp36/Il1b/Sbno2/Nfkbia/Myd88/Ticam1/Tnf/Litaf/Cebpb/Rela/Xbp1/Trib1/Zc3h12a/Cx3cl1/Serpine1/Gch1/Traf6/Cxcl2/Cxcl1/Il6	21
GO:0007204	positive regulation of cytosolic calcium ion concentration	23/479	158/11002	3.27063e-07	3.27063e-07	2.39953e-05	C5ar1/Il1b/Abl2/Tgm2/Jak3/Cx3cl1/Gpr65/Gna13/Grin2c/P2ry6/Grin1/Cxcl2/Cxcl1/Trpv4/Ccr7/Cxcr5/Plch2/Prnp/Cacna2d1/Adcy5/Ryr2/Adm/Lck	23
GO:0050663	cytokine secretion	23/479	158/11002	3.27063e-07	3.27063e-07	2.39953e-05	Arid5a/Il1b/Il4ra/Osm/Notch1/Abl2/Srgn/Tnf/Casp4/Slamf1/Il17ra/Rbpj/Xbp1/Il1a/Rabgef1/Zc3h12a/Cx3cl1/Trem1/Trpv4/Ccr7/Il6/Mapk11/Clec4n	23
GO:0050877	nervous system process	47/479	495/11002	3.40487e-07	3.40487e-07	2.44124e-05	Ptgs2/C5ar1/Il1b/Egr1/Rcan1/Jun/Icam1/Abl2/Tnf/Myc/Srf/Hmgcr/Comp/Il1a/Homer1/Slc1a3/Kcnq2/Cx3cl1/Sez6/Gch1/Ccnd2/Grin2c/Grin1/Cdkn2d/Gabrd/Grm4/Nptx1/Syne1/Shank1/Adora2a/Grik2/Atp2b2/Atf6/Il6/Rims2/Kalrn/Map1a/Prnp/Adcy5/Pkd1l3/Cntnap1/Sptbn4/Mapk8ip2/Grik5/Aoc2/Dll4/S100b	47
GO:0071216	cellular response to biotic stimulus	23/479	159/11002	3.67166e-07	3.67166e-07	2.57403e-05	Arid5a/Zfp36/Il1b/Sbno2/Nfkbia/Myd88/Ticam1/Tnf/Litaf/Cebpb/Ppp1r15b/Tirap/Rela/Xbp1/Trib1/Zc3h12a/Cx3cl1/Serpine1/Gch1/Traf6/Cxcl2/Cxcl1/Il6	23
GO:0010035	response to inorganic substance	33/479	291/11002	4.23488e-07	4.23488e-07	2.89446e-05	Id2/Junb/Kdm6b/Fos/Mt1/Mt2/Jun/Sphk1/Slc41a1/Tnf/Nr4a1/Fas/Ppp1r15b/Rela/Il1a/Homer1/Ripk1/Jund/Ucp2/Zc3h12a/Slc1a3/Gch1/Ncf1/Nptx1/Ccr7/Tfrc/Syt2/Il6/Prnp/Ryr2/Rnf112/Syt1/Lck	33
GO:0043065	positive regulation of apoptotic process	45/479	468/11002	4.31223e-07	4.31223e-07	2.89446e-05	Dusp1/Ptgs2/Il1b/Gadd45g/Egr1/Plaur/Jun/Osm/Notch1/Mcl1/Tgm2/B4galt1/F3/Atf4/Tnf/Nr4a1/Casp4/Fas/Skil/Myc/Gadd45b/Hip1/Btg1/Jak3/Hmgcr/Xbp1/Bcl2l1/Adamtsl4/Ripk1/Tcf7l2/Zc3h12a/Gadd45a/Grin1/Eef1e1/Tnfrsf12a/Nfkbid/Adora2a/Grik2/Atf6/Il6/Prnp/Adm/Lck/Grik5/S100b	45
GO:0051051	negative regulation of transport	36/479	335/11002	4.73222e-07	4.73222e-07	3.11019e-05	Ptgs2/Ier3/Il1b/Rrad/Osm/Midn/Gem/Icam1/Notch1/Srgn/Atf4/Tnf/Slamf1/Myc/Insig1/Irs2/Cd300lf/Hmgcr/Rabgef1/Pim3/Ucp2/Zc3h12a/Cx3cl1/Sh2b2/Siglece/Yrdc/Snx12/Klf7/Cnn2/Trim9/Il6/Cyp51/Kalrn/Wnk2/Nedd4/Pkia	36
GO:0072503	cellular divalent inorganic cation homeostasis	31/479	265/11002	4.83553e-07	4.83553e-07	3.11323e-05	C5ar1/Il1b/Mt1/Mt2/Marcksl1/Abl2/Tgm2/Slc41a1/Atf4/Jak3/Cx3cl1/Gpr65/Gna13/Grin2c/P2ry6/Grin1/Cxcl2/Cxcl1/Trpv4/Ccr7/Grik2/Atp2b2/Cxcr5/Plch2/Prnp/Cacna2d1/Adcy5/Ryr2/Adm/Lck/S100b	31
GO:0043068	positive regulation of programmed cell death	45/479	471/11002	5.16426e-07	5.16426e-07	3.25837e-05	Dusp1/Ptgs2/Il1b/Gadd45g/Egr1/Plaur/Jun/Osm/Notch1/Mcl1/Tgm2/B4galt1/F3/Atf4/Tnf/Nr4a1/Casp4/Fas/Skil/Myc/Gadd45b/Hip1/Btg1/Jak3/Hmgcr/Xbp1/Bcl2l1/Adamtsl4/Ripk1/Tcf7l2/Zc3h12a/Gadd45a/Grin1/Eef1e1/Tnfrsf12a/Nfkbid/Adora2a/Grik2/Atf6/Il6/Prnp/Adm/Lck/Grik5/S100b	45
GO:0048659	smooth muscle cell proliferation	19/479	116/11002	5.52986e-07	5.52986e-07	3.42064e-05	Id2/Ptgs2/Egr1/Jun/Myd88/Tgm2/Tnf/Klf4/Rbpj/Myc/Adamts1/Hmgcr/Trib1/Tcf7l2/Cx3cl1/P2ry6/Traf6/Il6/Kalrn	19
GO:0032675	regulation of interleukin-6 production	18/479	107/11002	7.32242e-07	7.32242e-07	4.44237e-05	Arid5a/Il1b/Myd88/Ticam1/Stat3/Tnf/Slamf1/Cebpb/Tirap/Xbp1/Il1a/Rabgef1/Zc3h12a/Traf6/Nlrx1/Cd300ld/Trpv4/Il6	18
GO:0002526	acute inflammatory response	13/479	58/11002	8.98326e-07	8.98326e-07	5.25683e-05	Ptgs2/Il1b/Icam1/Stat3/B4galt1/F3/Tnf/Il1a/Fcgr3/Trem1/Cxcl1/Ccr7/Il6	13
GO:0038066	p38MAPK cascade	11/479	41/11002	9.16177e-07	9.16177e-07	5.25683e-05	Dusp1/Zfp36/Il1b/Gadd45g/Sphk1/Map2k3/Gadd45b/Zc3h12a/Gadd45a/Per1/Ncf1	11
GO:0022407	regulation of cell-cell adhesion	30/479	259/11002	9.16482e-07	9.16482e-07	5.25683e-05	Il1b/Gcnt2/Cd83/Runx1/Il4ra/Icam1/Abl2/Tnf/Nfkbiz/Klf4/Irf1/Slamf1/Cebpb/Jak3/Rela/Xbp1/Gtpbp4/Zc3h12a/Cx3cl1/Hsp90aa1/Flot1/Traf6/Nfkbid/Trpv4/Ccr7/Adora2a/Tfrc/Il6/Prnp/Lck	30
GO:0070372	regulation of ERK1 and ERK2 cascade	24/479	180/11002	9.41084e-07	9.41084e-07	5.28179e-05	Dusp1/C5ar1/Il1b/Gcnt2/Jun/Icam1/Notch1/Abl2/Klf4/Slamf1/Ptpn1/Tirap/Hmgcr/Xbp1/Il1a/Cx3cl1/Errfi1/P2ry6/Trpv4/Dnajc27/Il6/Sema7a/Wnk2/Spry4	24
GO:0070371	ERK1 and ERK2 cascade	25/479	193/11002	9.66454e-07	9.66454e-07	5.28179e-05	Dusp1/C5ar1/Il1b/Gcnt2/Jun/Icam1/Notch1/Abl2/Klf4/Slamf1/Ptpn1/Myc/Tirap/Hmgcr/Xbp1/Il1a/Cx3cl1/Errfi1/P2ry6/Trpv4/Dnajc27/Il6/Sema7a/Wnk2/Spry4	25
GO:0010563	negative regulation of phosphorus metabolic process	40/479	405/11002	9.87802e-07	9.87802e-07	5.28179e-05	Socs3/Dusp1/Ier3/Il1b/Gadd45g/Dusp8/Jun/Dusp5/Midn/Stat3/Tnf/Pde12/Klf4/Irf1/Ppp1r15b/Ptpn1/Irs2/Dusp16/Gadd45b/Hmgcr/Xbp1/Trib1/Rabgef1/Zc3h12a/Gadd45a/Per1/Dusp2/Ppp1r15a/Errfi1/Cdkn2d/Paqr3/Adora2a/Inpp5j/Il6/Prnp/Wnk2/Lmtk3/Dok2/Pkia/Spry4	40
GO:0045936	negative regulation of phosphate metabolic process	40/479	405/11002	9.87802e-07	9.87802e-07	5.28179e-05	Socs3/Dusp1/Ier3/Il1b/Gadd45g/Dusp8/Jun/Dusp5/Midn/Stat3/Tnf/Pde12/Klf4/Irf1/Ppp1r15b/Ptpn1/Irs2/Dusp16/Gadd45b/Hmgcr/Xbp1/Trib1/Rabgef1/Zc3h12a/Gadd45a/Per1/Dusp2/Ppp1r15a/Errfi1/Cdkn2d/Paqr3/Adora2a/Inpp5j/Il6/Prnp/Wnk2/Lmtk3/Dok2/Pkia/Spry4	40
GO:0001505	regulation of neurotransmitter levels	28/479	233/11002	1.01521e-06	1.01521e-06	5.33788e-05	Ptgs2/Il1b/Sphk1/Icam1/Ticam1/Tnf/Klf4/Xbp1/Bcl2l1/Zc3h12a/Slc1a3/Hsp90aa1/Flot1/Gch1/Tha1/Chka/Grm4/Adora2a/Atp2b2/Syt2/Trim9/Syp/Il6/Rims2/Sptbn2/Syt1/Grik5/Erc1	28
GO:0050804	modulation of chemical synaptic transmission	34/479	318/11002	1.11737e-06	1.11737e-06	5.77872e-05	Ptgs2/Il1b/Egr1/Sphk1/Srgn/Stat3/Tnf/Srf/Bcl2l1/Homer1/Slc1a3/Flot1/Grin2c/Grin1/Grm4/Nptx1/Syne1/Shank1/Adora2a/Grik2/Atp2b2/Syt2/Syp/Rims2/Kalrn/Map1a/Prnp/Nedd4/Syt1/Lrp8/Mapk8ip2/Ptprd/Grik5/S100b	34
GO:0099177	regulation of trans-synaptic signaling	34/479	319/11002	1.20084e-06	1.20084e-06	6.1102e-05	Ptgs2/Il1b/Egr1/Sphk1/Srgn/Stat3/Tnf/Srf/Bcl2l1/Homer1/Slc1a3/Flot1/Grin2c/Grin1/Grm4/Nptx1/Syne1/Shank1/Adora2a/Grik2/Atp2b2/Syt2/Syp/Rims2/Kalrn/Map1a/Prnp/Nedd4/Syt1/Lrp8/Mapk8ip2/Ptprd/Grik5/S100b	34
GO:0072507	divalent inorganic cation homeostasis	31/479	277/11002	1.27198e-06	1.27198e-06	6.36948e-05	C5ar1/Il1b/Mt1/Mt2/Marcksl1/Abl2/Tgm2/Slc41a1/Atf4/Jak3/Cx3cl1/Gpr65/Gna13/Grin2c/P2ry6/Grin1/Cxcl2/Cxcl1/Trpv4/Ccr7/Grik2/Atp2b2/Cxcr5/Plch2/Prnp/Cacna2d1/Adcy5/Ryr2/Adm/Lck/S100b	31
GO:0043367	CD4-positive, alpha-beta T cell differentiation	13/479	60/11002	1.35811e-06	1.35811e-06	6.64676e-05	Bcl3/Gadd45g/Cd83/Runx1/Il4ra/Stat3/Nfkbiz/Irf1/Jak3/Zc3h12a/Nfkbid/Ccr7/Il6	13
GO:0019221	cytokine-mediated signaling pathway	27/479	223/11002	1.3695e-06	1.3695e-06	6.64676e-05	Il1b/Egr1/Ugcg/Osm/Nfkbia/Sphk1/Myd88/Stat3/F3/Tnf/Casp4/Irf1/Cd300lf/Jak3/Rela/Il1a/Ripk1/Rabgef1/Cx3cl1/Sh2b2/Ifitm7/Traf6/Cxcl2/Cxcl1/Osmr/Jak1/Il6	27
GO:0050729	positive regulation of inflammatory response	16/479	90/11002	1.41652e-06	1.41652e-06	6.77085e-05	Ptgs2/Il1b/Osm/Nfkbia/Myd88/Ticam1/Tgm2/Tnf/Nfkbiz/Cebpb/Il17ra/Serpine1/Fcgr3/Trpv4/Ccr7/Il6	16
GO:0030855	epithelial cell differentiation	32/479	293/11002	1.46515e-06	1.46515e-06	6.89875e-05	Fosl2/Id2/Ptgs2/Zfp36/Il1b/Kdm6b/Ugcg/Tgm1/Plaur/Jun/Icam1/Notch1/Abl2/Myd88/B4galt1/Tnf/Klf4/Cebpb/Skil/Rbpj/Btg1/Xbp1/Il1a/Adamtsl4/Serpine1/Prkx/Errfi1/Id1/Maff/Jmjd1c/Klf7/Atp2b2	32
GO:0072358	cardiovascular system development	44/479	474/11002	1.52474e-06	1.52474e-06	6.90115e-05	Socs3/Ptgs2/Junb/C5ar1/Il1b/Zfand5/Egr1/Runx1/Jun/Sphk1/Notch1/Abl2/Stat3/B4galt1/F3/Klf4/Nr4a1/Rbpj/Adamts1/Btg1/Srf/Xbp1/Comp/Il1a/Tcf7l2/Lrg1/Zc3h12a/Tiparp/Cemip2/Cx3cl1/Serpine1/Gna13/Prkx/Ubp1/Errfi1/Apob/Jak1/Tnfrsf12a/Id1/Vash1/Nedd4/Kctd10/Adm/Dll4	44
GO:0042088	T-helper 1 type immune response	10/479	35/11002	1.53129e-06	1.53129e-06	6.90115e-05	Arid5a/Il1b/Bcl3/Gadd45g/Il4ra/Irf1/Slamf1/Jak3/Traf6/Ccr7	10
GO:0043370	regulation of CD4-positive, alpha-beta T cell differentiation	10/479	35/11002	1.53129e-06	1.53129e-06	6.90115e-05	Cd83/Runx1/Il4ra/Nfkbiz/Irf1/Jak3/Zc3h12a/Nfkbid/Ccr7/Il6	10
GO:0014070	response to organic cyclic compound	40/479	413/11002	1.62423e-06	1.62423e-06	7.1798e-05	Pim1/Fosl2/Zfp36/Junb/Il1b/Egr1/Cd83/Cgas/Jun/Nfkbia/Ticam1/Stat3/Atf4/Tnf/Pde12/Fas/Socs2/Insig1/Mat2a/Ddx21/Bcl2l1/Homer1/Jund/Paqr8/Zc3h12a/Tiparp/Crem/Flot1/Per1/Aplp1/P2ry6/Grin1/Cdkn2d/Gramd1a/Adora2a/Il6/Kalrn/Adcy5/Ryr2/Nsg2	40
GO:0030155	regulation of cell adhesion	42/479	444/11002	1.63863e-06	1.63863e-06	7.1798e-05	Dusp1/Il1b/Gcnt2/Cd83/Runx1/Il4ra/Icam1/Notch1/Abl2/Rnd1/Tgm2/Tnf/Nfkbiz/Klf4/Irf1/Slamf1/Cebpb/Rbpj/Srf/Jak3/Rela/Xbp1/Gtpbp4/Ninj1/Zc3h12a/Cx3cl1/Hsp90aa1/Flot1/Serpine1/Prkx/Epb41l4b/Traf6/Nfkbid/Trpv4/Ccr7/Plet1/Adora2a/Tfrc/Il6/Prnp/Coro2b/Lck	42
GO:0050707	regulation of cytokine secretion	20/479	137/11002	1.83737e-06	1.83737e-06	7.94031e-05	Arid5a/Il1b/Il4ra/Osm/Abl2/Srgn/Tnf/Casp4/Slamf1/Il17ra/Xbp1/Il1a/Rabgef1/Zc3h12a/Cx3cl1/Trpv4/Ccr7/Il6/Mapk11/Clec4n	20
GO:0032635	interleukin-6 production	18/479	114/11002	1.90558e-06	1.90558e-06	8.01546e-05	Arid5a/Il1b/Myd88/Ticam1/Stat3/Tnf/Slamf1/Cebpb/Tirap/Xbp1/Il1a/Rabgef1/Zc3h12a/Traf6/Nlrx1/Cd300ld/Trpv4/Il6	18
GO:0048660	regulation of smooth muscle cell proliferation	18/479	114/11002	1.90558e-06	1.90558e-06	8.01546e-05	Id2/Ptgs2/Egr1/Jun/Myd88/Tgm2/Tnf/Klf4/Rbpj/Myc/Adamts1/Hmgcr/Trib1/Tcf7l2/Cx3cl1/P2ry6/Traf6/Il6	18
GO:1904018	positive regulation of vasculature development	19/479	126/11002	2.02379e-06	2.02379e-06	8.40069e-05	Ptgs2/C5ar1/Il1b/Egr1/Runx1/Sphk1/Notch1/Stat3/F3/Klf4/Btg1/Xbp1/Il1a/Lrg1/Zc3h12a/Cx3cl1/Serpine1/Jak1/Adm	19
GO:0048514	blood vessel morphogenesis	38/479	387/11002	2.14542e-06	2.14542e-06	8.7899e-05	Ptgs2/Junb/C5ar1/Il1b/Runx1/Jun/Sphk1/Notch1/Stat3/B4galt1/F3/Klf4/Nr4a1/Rbpj/Adamts1/Btg1/Srf/Xbp1/Comp/Il1a/Lrg1/Zc3h12a/Tiparp/Cemip2/Cx3cl1/Serpine1/Gna13/Prkx/Ubp1/Apob/Jak1/Tnfrsf12a/Id1/Vash1/Nedd4/Kctd10/Adm/Dll4	38
GO:0022409	positive regulation of cell-cell adhesion	22/479	163/11002	2.17674e-06	2.17674e-06	8.80392e-05	Il1b/Gcnt2/Cd83/Runx1/Il4ra/Icam1/Tnf/Nfkbiz/Irf1/Slamf1/Jak3/Rela/Xbp1/Cx3cl1/Hsp90aa1/Flot1/Traf6/Nfkbid/Ccr7/Tfrc/Il6/Lck	22
GO:0001944	vasculature development	43/479	466/11002	2.35894e-06	2.35894e-06	9.42003e-05	Socs3/Ptgs2/Junb/C5ar1/Il1b/Zfand5/Egr1/Runx1/Jun/Sphk1/Notch1/Stat3/B4galt1/F3/Klf4/Nr4a1/Rbpj/Adamts1/Btg1/Srf/Xbp1/Comp/Il1a/Tcf7l2/Lrg1/Zc3h12a/Tiparp/Cemip2/Cx3cl1/Serpine1/Gna13/Prkx/Ubp1/Errfi1/Apob/Jak1/Tnfrsf12a/Id1/Vash1/Nedd4/Kctd10/Adm/Dll4	43
GO:0042033	chemokine biosynthetic process	6/479	11/11002	2.5311e-06	2.5311e-06	9.85796e-05	Il1b/Egr1/Myd88/Ticam1/Tnf/Il6	6
GO:0045073	regulation of chemokine biosynthetic process	6/479	11/11002	2.5311e-06	2.5311e-06	9.85796e-05	Il1b/Egr1/Myd88/Ticam1/Tnf/Il6	6
GO:0002791	regulation of peptide secretion	34/479	330/11002	2.58911e-06	2.58911e-06	9.96095e-05	Arid5a/Il1b/Il4ra/Osm/Midn/Abl2/Srgn/Tnf/Casp4/Slamf1/Ildr1/Il17ra/Irs2/Hmgcr/Xbp1/Il1a/Tcf7l2/Rabgef1/Pim3/Ucp2/Zc3h12a/Cx3cl1/Traf6/Trpv4/Ccr7/Klf7/Adora2a/Il6/Cyp51/Kalrn/Myom1/Adcy5/Mapk11/Clec4n	34
GO:0048661	positive regulation of smooth muscle cell proliferation	15/479	84/11002	2.85057e-06	2.85057e-06	0.000108347	Id2/Ptgs2/Egr1/Jun/Myd88/Tgm2/Tnf/Rbpj/Myc/Adamts1/Hmgcr/Cx3cl1/P2ry6/Traf6/Il6	15
GO:0035710	CD4-positive, alpha-beta T cell activation	14/479	74/11002	2.99904e-06	2.99904e-06	0.000112154	Bcl3/Gadd45g/Cd83/Runx1/Il4ra/Stat3/Nfkbiz/Irf1/Cebpb/Jak3/Zc3h12a/Nfkbid/Ccr7/Il6	14
GO:0030217	T cell differentiation	24/479	192/11002	3.02184e-06	3.02184e-06	0.000112154	Il1b/Bcl3/Gadd45g/Egr1/Cd83/Runx1/Il4ra/Abl2/Lfng/Stat3/Nfkbiz/Irf1/Fas/Srf/Jak3/Xbp1/Zc3h12a/Hsp90aa1/Nfkbid/Ccr7/Il6/Ctla2a/Lck/Dll4	24
GO:0006874	cellular calcium ion homeostasis	28/479	247/11002	3.25248e-06	3.25248e-06	0.000117993	C5ar1/Il1b/Marcksl1/Abl2/Tgm2/Atf4/Jak3/Cx3cl1/Gpr65/Gna13/Grin2c/P2ry6/Grin1/Cxcl2/Cxcl1/Trpv4/Ccr7/Grik2/Atp2b2/Cxcr5/Plch2/Prnp/Cacna2d1/Adcy5/Ryr2/Adm/Lck/S100b	28
GO:0001933	negative regulation of protein phosphorylation	32/479	304/11002	3.25397e-06	3.25397e-06	0.000117993	Socs3/Dusp1/Il1b/Gadd45g/Dusp8/Jun/Dusp5/Klf4/Irf1/Ppp1r15b/Ptpn1/Dusp16/Gadd45b/Hmgcr/Xbp1/Trib1/Rabgef1/Zc3h12a/Gadd45a/Per1/Dusp2/Ppp1r15a/Errfi1/Paqr3/Adora2a/Inpp5j/Il6/Prnp/Wnk2/Dok2/Pkia/Spry4	32
GO:0006875	cellular metal ion homeostasis	33/479	319/11002	3.33779e-06	3.33779e-06	0.000119657	C5ar1/Il1b/Mt1/Mt2/Marcksl1/Abl2/Tgm2/Slc41a1/Atf4/Myc/Jak3/Cx3cl1/Gpr65/Gna13/Grin2c/P2ry6/Grin1/Cxcl2/Cxcl1/Trpv4/Ccr7/Tfrc/Grik2/Atp2b2/Cxcr5/Plch2/Prnp/Cacna2d1/Adcy5/Ryr2/Adm/Lck/S100b	33
GO:0055065	metal ion homeostasis	36/479	364/11002	3.39544e-06	3.39544e-06	0.000120356	C5ar1/Il1b/Mt1/Mt2/Marcksl1/Abl2/Tgm2/Slc41a1/Atf4/Slc12a7/Myc/Jak3/Steap4/Cx3cl1/Gpr65/Gna13/Grin2c/P2ry6/Grin1/Cxcl2/Cxcl1/Trpv4/Ccr7/Adora2a/Tfrc/Grik2/Atp2b2/Cxcr5/Plch2/Prnp/Cacna2d1/Adcy5/Ryr2/Adm/Lck/S100b	36
GO:0030098	lymphocyte differentiation	29/479	262/11002	3.50968e-06	3.50968e-06	0.000123024	Id2/Il1b/Bcl3/Gadd45g/Egr1/Cd83/Runx1/Il4ra/Abl2/Lfng/Stat3/Nfkbiz/Irf1/Slamf1/Fas/Rbpj/Irf2bp2/Srf/Jak3/Xbp1/Zc3h12a/Hsp90aa1/Nfkbid/Ccr7/Il6/Ctla2a/Lck/Tyro3/Dll4	29
GO:0007254	JNK cascade	20/479	143/11002	3.62236e-06	3.62236e-06	0.000125578	Il1b/Gadd45g/Myd88/Tnf/Slamf1/Ptpn1/Gadd45b/Tirap/Trib1/Il1a/Ripk1/Gadd45a/Per1/Ncf1/Traf6/Unc5cl/Trpv4/Ccr7/Grik2/Mapk8ip2	20
GO:1903037	regulation of leukocyte cell-cell adhesion	24/479	195/11002	3.97613e-06	3.97613e-06	0.000132083	Il1b/Cd83/Runx1/Il4ra/Icam1/Tnf/Nfkbiz/Klf4/Irf1/Slamf1/Cebpb/Jak3/Rela/Xbp1/Zc3h12a/Hsp90aa1/Traf6/Nfkbid/Ccr7/Adora2a/Tfrc/Il6/Prnp/Lck	24
GO:0002293	alpha-beta T cell differentiation involved in immune response	11/479	47/11002	3.98455e-06	3.98455e-06	0.000132083	Bcl3/Gadd45g/Il4ra/Stat3/Nfkbiz/Irf1/Jak3/Zc3h12a/Nfkbid/Ccr7/Il6	11
GO:0002294	CD4-positive, alpha-beta T cell differentiation involved in immune response	11/479	47/11002	3.98455e-06	3.98455e-06	0.000132083	Bcl3/Gadd45g/Il4ra/Stat3/Nfkbiz/Irf1/Jak3/Zc3h12a/Nfkbid/Ccr7/Il6	11
GO:0042093	T-helper cell differentiation	11/479	47/11002	3.98455e-06	3.98455e-06	0.000132083	Bcl3/Gadd45g/Il4ra/Stat3/Nfkbiz/Irf1/Jak3/Zc3h12a/Nfkbid/Ccr7/Il6	11
GO:0001568	blood vessel development	41/479	444/11002	4.01934e-06	4.01934e-06	0.000132083	Socs3/Ptgs2/Junb/C5ar1/Il1b/Egr1/Runx1/Jun/Sphk1/Notch1/Stat3/B4galt1/F3/Klf4/Nr4a1/Rbpj/Adamts1/Btg1/Srf/Xbp1/Comp/Il1a/Tcf7l2/Lrg1/Zc3h12a/Tiparp/Cemip2/Cx3cl1/Serpine1/Gna13/Prkx/Ubp1/Apob/Jak1/Tnfrsf12a/Id1/Vash1/Nedd4/Kctd10/Adm/Dll4	41
GO:0001525	angiogenesis	33/479	322/11002	4.09076e-06	4.09076e-06	0.000133044	Ptgs2/C5ar1/Il1b/Runx1/Jun/Sphk1/Notch1/Stat3/B4galt1/F3/Klf4/Nr4a1/Rbpj/Adamts1/Btg1/Srf/Xbp1/Il1a/Lrg1/Zc3h12a/Cemip2/Cx3cl1/Serpine1/Gna13/Prkx/Ubp1/Jak1/Tnfrsf12a/Id1/Vash1/Kctd10/Adm/Dll4	33
GO:0046649	lymphocyte activation	43/479	477/11002	4.31553e-06	4.31553e-06	0.000138922	Id2/Il1b/Bcl3/Gadd45g/Egr1/Cd83/Runx1/Il4ra/Cgas/Icam1/Abl2/Myd88/Lfng/Ticam1/Stat3/Nfkbiz/Irf1/Slamf1/Fas/Cebpb/Rbpj/Irs2/Irf2bp2/Tirap/Srf/Jak3/Xbp1/Zc3h12a/Hsp90aa1/Traf6/Nfkbid/Ccr7/Adora2a/Tfrc/H60b/Il6/Cxcr5/Prnp/Nedd4/Ctla2a/Lck/Tyro3/Dll4	43
GO:0061061	muscle structure development	38/479	399/11002	4.45586e-06	4.45586e-06	0.000141713	Pim1/Kdm6b/Fos/Egr1/Rcan1/Il4ra/Notch1/Tnf/Nr4a1/Skil/Rbpj/Myc/Btg1/Srf/Hmgcr/Xbp1/Actg1/Comp/Sema4c/Homer1/Ripk1/Tcf7l2/Meg3/Egr2/Flot1/H3f3b/Lbx1/Maff/Syne1/Trim72/Il6/Myom1/Fer1l5/Mapk11/Ryr2/Adm/Dll4/S100b	38
GO:0071248	cellular response to metal ion	15/479	87/11002	4.49207e-06	4.49207e-06	0.000141713	Id2/Junb/Fos/Mt1/Mt2/Jun/Slc41a1/Fas/Jund/Ncf1/Nptx1/Tfrc/Syt2/Prnp/Syt1	15
GO:0008285	negative regulation of cell population proliferation	39/479	415/11002	4.5855e-06	4.5855e-06	0.000143228	Dusp1/Id2/Ptgs2/Il1b/Runx1/Jun/Notch1/Stat3/B4galt1/Tnf/Klf4/Irf1/Fas/Cebpb/Rbpj/Myc/Etv3/Btg1/Srf/Trib1/Gtpbp4/Il1a/Ripk1/Lbx1/Tes/Cdkn2d/Eef1e1/Btg3/Pim2/Vash1/Insl3/Adora2a/Rian/Il6/Prnp/Wnk2/Mapk11/Adm/Dll4	39
GO:0002790	peptide secretion	39/479	416/11002	4.85827e-06	4.85827e-06	0.00015026	Arid5a/Il1b/Il4ra/Osm/Midn/Notch1/Abl2/Srgn/Tnf/Casp4/Slamf1/Ildr1/Il17ra/Rbpj/Irs2/Hmgcr/Xbp1/Comp/Il1a/Tcf7l2/Rabgef1/Pim3/Ucp2/Zc3h12a/Cx3cl1/Trem1/Traf6/Trpv4/Ccr7/Klf7/Adora2a/Il6/Rims2/Cyp51/Kalrn/Myom1/Adcy5/Mapk11/Clec4n	39
GO:0002287	alpha-beta T cell activation involved in immune response	11/479	48/11002	4.96907e-06	4.96907e-06	0.000152195	Bcl3/Gadd45g/Il4ra/Stat3/Nfkbiz/Irf1/Jak3/Zc3h12a/Nfkbid/Ccr7/Il6	11
GO:0070555	response to interleukin-1	13/479	67/11002	5.04537e-06	5.04537e-06	0.000153046	Il1b/Egr1/Myd88/Irf1/Cebpb/Rela/Il1a/Zc3h12a/Cx3cl1/Serpine1/Traf6/Il6/Mapk11	13
GO:0055074	calcium ion homeostasis	28/479	253/11002	5.19015e-06	5.19015e-06	0.000155939	C5ar1/Il1b/Marcksl1/Abl2/Tgm2/Atf4/Jak3/Cx3cl1/Gpr65/Gna13/Grin2c/P2ry6/Grin1/Cxcl2/Cxcl1/Trpv4/Ccr7/Grik2/Atp2b2/Cxcr5/Plch2/Prnp/Cacna2d1/Adcy5/Ryr2/Adm/Lck/S100b	28
GO:0044057	regulation of system process	32/479	311/11002	5.27561e-06	5.27561e-06	0.000157011	Ptgs2/Il1b/Runx1/Dusp5/Sphk1/Icam1/Notch1/Tnf/Klf4/Srf/Il1a/Homer1/Zc3h12a/Cx3cl1/Gch1/Ncf1/Errfi1/Grin1/Nptx1/Syne1/Shank1/Adora2a/Scn2b/Il6/Rims2/Coro2b/Cacna2d1/Ryr2/Sptbn4/Adm/Lck/S100b	32
GO:0046328	regulation of JNK cascade	19/479	135/11002	5.76809e-06	5.76809e-06	0.000170064	Il1b/Gadd45g/Myd88/Tnf/Slamf1/Ptpn1/Gadd45b/Tirap/Il1a/Ripk1/Gadd45a/Per1/Ncf1/Traf6/Unc5cl/Trpv4/Ccr7/Grik2/Mapk8ip2	19
GO:0042110	T cell activation	33/479	328/11002	6.08658e-06	6.08658e-06	0.000177792	Il1b/Bcl3/Gadd45g/Egr1/Cd83/Runx1/Il4ra/Cgas/Icam1/Abl2/Lfng/Stat3/Nfkbiz/Irf1/Slamf1/Fas/Cebpb/Srf/Jak3/Xbp1/Zc3h12a/Hsp90aa1/Traf6/Nfkbid/Ccr7/Adora2a/Tfrc/Il6/Prnp/Nedd4/Ctla2a/Lck/Dll4	33
GO:0050708	regulation of protein secretion	32/479	314/11002	6.4535e-06	6.4535e-06	0.000186781	Arid5a/Il1b/Il4ra/Osm/Midn/Abl2/Srgn/Tnf/Casp4/Slamf1/Il17ra/Irs2/Hmgcr/Xbp1/Il1a/Tcf7l2/Rabgef1/Pim3/Ucp2/Zc3h12a/Cx3cl1/Traf6/Trpv4/Ccr7/Klf7/Adora2a/Il6/Cyp51/Myom1/Adcy5/Mapk11/Clec4n	32
GO:0007159	leukocyte cell-cell adhesion	25/479	215/11002	6.98901e-06	6.98901e-06	0.000200441	Il1b/Cd83/Runx1/Il4ra/Icam1/Tnf/Nfkbiz/Klf4/Irf1/Slamf1/Cebpb/Jak3/Rela/Xbp1/Zc3h12a/Hsp90aa1/Traf6/Itgb7/Nfkbid/Ccr7/Adora2a/Tfrc/Il6/Prnp/Lck	25
GO:0007169	transmembrane receptor protein tyrosine kinase signaling pathway	33/479	331/11002	7.3901e-06	7.3901e-06	0.000210034	Socs3/Il1b/Csrnp1/Zfand5/Plaur/Notch1/Abl2/Stat3/F3/Socs2/Rbpj/Ptpn1/Irs2/Hip1/Rela/Xbp1/Tcf7l2/Rabgef1/Cish/Tiparp/Myo1c/Sh2b2/Ptpn12/Ncf1/Ndel1/Errfi1/Trim72/Igfbp6/Nedd4/Dok2/Lck/Tyro3/Spry4	33
GO:0007517	muscle organ development	26/479	230/11002	7.68862e-06	7.68862e-06	0.000216568	Pim1/Fos/Egr1/Rcan1/Notch1/Nr4a1/Skil/Rbpj/Myc/Hmgcr/Xbp1/Homer1/Ripk1/Tcf7l2/Meg3/Egr2/Flot1/Lbx1/Maff/Trim72/Il6/Myom1/Mapk11/Ryr2/Dll4/S100b	26
GO:0046632	alpha-beta T cell differentiation	14/479	80/11002	7.80407e-06	7.80407e-06	0.000217874	Bcl3/Gadd45g/Cd83/Runx1/Il4ra/Abl2/Stat3/Nfkbiz/Irf1/Jak3/Zc3h12a/Nfkbid/Ccr7/Il6	14
GO:0045766	positive regulation of angiogenesis	17/479	114/11002	8.13349e-06	8.13349e-06	0.000225079	Ptgs2/C5ar1/Il1b/Runx1/Sphk1/Stat3/F3/Klf4/Btg1/Xbp1/Il1a/Lrg1/Zc3h12a/Cx3cl1/Serpine1/Jak1/Adm	17
GO:0046330	positive regulation of JNK cascade	16/479	103/11002	8.78826e-06	8.78826e-06	0.000241084	Il1b/Gadd45g/Myd88/Tnf/Slamf1/Ptpn1/Gadd45b/Tirap/Il1a/Ripk1/Gadd45a/Ncf1/Traf6/Unc5cl/Trpv4/Ccr7	16
GO:0055082	cellular chemical homeostasis	41/479	459/11002	9.09629e-06	9.09629e-06	0.000245706	C5ar1/Il1b/Mt1/Mt2/Marcksl1/Icam1/Abl2/Rab20/Tgm2/Slc41a1/Atf4/Myc/Jak3/Hmgcr/Xbp1/Tcf7l2/Pim3/Ucp2/Cx3cl1/Gpr65/Gna13/Grin2c/P2ry6/Grin1/Cxcl2/Cxcl1/Trpv4/Ccr7/Klf7/Tfrc/Grik2/Atp2b2/Cxcr5/Plch2/Prnp/Cacna2d1/Adcy5/Ryr2/Adm/Lck/S100b	41
GO:0045765	regulation of angiogenesis	23/479	191/11002	9.11251e-06	9.11251e-06	0.000245706	Ptgs2/C5ar1/Il1b/Runx1/Sphk1/Notch1/Stat3/F3/Klf4/Adamts1/Btg1/Xbp1/Il1a/Lrg1/Zc3h12a/Cx3cl1/Serpine1/Jak1/Tnfrsf12a/Id1/Vash1/Adm/Dll4	23
GO:0045622	regulation of T-helper cell differentiation	8/479	26/11002	9.5034e-06	9.5034e-06	0.000254074	Il4ra/Nfkbiz/Irf1/Jak3/Zc3h12a/Nfkbid/Ccr7/Il6	8
GO:0009306	protein secretion	37/479	397/11002	9.79259e-06	9.79259e-06	0.000257442	Arid5a/Il1b/Il4ra/Osm/Midn/Notch1/Abl2/Srgn/Tnf/Casp4/Slamf1/Il17ra/Rbpj/Irs2/Hmgcr/Xbp1/Comp/Il1a/Tcf7l2/Rabgef1/Pim3/Ucp2/Zc3h12a/Cx3cl1/Trem1/Traf6/Trpv4/Ccr7/Klf7/Adora2a/Il6/Rims2/Cyp51/Myom1/Adcy5/Mapk11/Clec4n	37
GO:0035592	establishment of protein localization to extracellular region	37/479	397/11002	9.79259e-06	9.79259e-06	0.000257442	Arid5a/Il1b/Il4ra/Osm/Midn/Notch1/Abl2/Srgn/Tnf/Casp4/Slamf1/Il17ra/Rbpj/Irs2/Hmgcr/Xbp1/Comp/Il1a/Tcf7l2/Rabgef1/Pim3/Ucp2/Zc3h12a/Cx3cl1/Trem1/Traf6/Trpv4/Ccr7/Klf7/Adora2a/Il6/Rims2/Cyp51/Myom1/Adcy5/Mapk11/Clec4n	37
GO:0051090	regulation of DNA-binding transcription factor activity	30/479	291/11002	1.00292e-05	1.00292e-05	0.000261484	Pim1/Id2/Il1b/Nfkbia/Sphk1/Icam1/Myd88/Ticam1/Stat3/Tnf/Klf4/Tirap/Srf/Rela/Trib1/Ripk1/Tcf7l2/Zc3h12a/Cx3cl1/Flot1/Rlim/Pprc1/Traf6/Nfkbid/Id1/Gtf2a2/Il6/Prnp/Lrp8/Hr	30
GO:0031349	positive regulation of defense response	22/479	179/11002	1.02571e-05	1.02571e-05	0.000265233	Ptgs2/Il1b/Cgas/Osm/Nfkbia/Pvr/Myd88/Ticam1/Tgm2/Tnf/Nfkbiz/Cebpb/Il17ra/Polr3d/Tirap/Serpine1/Fcgr3/Cxcl1/Trpv4/Ccr7/H60b/Il6	22
GO:0060537	muscle tissue development	27/479	248/11002	1.03732e-05	1.03732e-05	0.000266053	Pim1/Id2/Kdm6b/Zfand5/Fos/Egr1/Rcan1/Notch1/Nr4a1/Skil/Rbpj/Myc/Srf/Hmgcr/Homer1/Ripk1/Tcf7l2/Meg3/Tiparp/Egr2/Flot1/Maff/Myom1/Mapk11/Ryr2/Dll4/S100b	27
GO:0050801	ion homeostasis	40/479	446/11002	1.067e-05	1.067e-05	0.00027146	C5ar1/Il1b/Mt1/Mt2/Marcksl1/Abl2/Rab20/Tgm2/Slc41a1/Atf4/Slc12a7/Myc/Jak3/Xbp1/Steap4/Cx3cl1/Gpr65/Gna13/Grin2c/P2ry6/Grin1/Cxcl2/Cxcl1/Trpv4/Ccr7/Adora2a/Tfrc/Grik2/Atp2b2/Scn2b/Cxcr5/Plch2/Prnp/Wnk2/Cacna2d1/Adcy5/Ryr2/Adm/Lck/S100b	40
GO:1903039	positive regulation of leukocyte cell-cell adhesion	19/479	141/11002	1.09748e-05	1.09748e-05	0.00027698	Il1b/Cd83/Runx1/Il4ra/Icam1/Tnf/Nfkbiz/Irf1/Slamf1/Jak3/Rela/Xbp1/Hsp90aa1/Traf6/Nfkbid/Ccr7/Tfrc/Il6/Lck	19
GO:0071692	protein localization to extracellular region	37/479	400/11002	1.16063e-05	1.16063e-05	0.000290593	Arid5a/Il1b/Il4ra/Osm/Midn/Notch1/Abl2/Srgn/Tnf/Casp4/Slamf1/Il17ra/Rbpj/Irs2/Hmgcr/Xbp1/Comp/Il1a/Tcf7l2/Rabgef1/Pim3/Ucp2/Zc3h12a/Cx3cl1/Trem1/Traf6/Trpv4/Ccr7/Klf7/Adora2a/Il6/Rims2/Cyp51/Myom1/Adcy5/Mapk11/Clec4n	37
GO:0002792	negative regulation of peptide secretion	15/479	94/11002	1.19832e-05	1.19832e-05	0.000297667	Il1b/Midn/Srgn/Tnf/Slamf1/Hmgcr/Rabgef1/Pim3/Ucp2/Zc3h12a/Cx3cl1/Klf7/Il6/Cyp51/Kalrn	15
GO:1901342	regulation of vasculature development	24/479	209/11002	1.31874e-05	1.31874e-05	0.000325022	Ptgs2/C5ar1/Il1b/Egr1/Runx1/Sphk1/Notch1/Stat3/F3/Klf4/Adamts1/Btg1/Xbp1/Il1a/Lrg1/Zc3h12a/Cx3cl1/Serpine1/Jak1/Tnfrsf12a/Id1/Vash1/Adm/Dll4	24
GO:1900744	regulation of p38MAPK cascade	9/479	35/11002	1.33684e-05	1.33684e-05	0.000325657	Dusp1/Il1b/Gadd45g/Sphk1/Gadd45b/Zc3h12a/Gadd45a/Per1/Ncf1	9
GO:0048663	neuron fate commitment	7/479	20/11002	1.34196e-05	1.34196e-05	0.000325657	Id2/Runx1/Notch1/Rbpj/Epop/Lbx1/Dll4	7
GO:0055080	cation homeostasis	37/479	403/11002	1.37244e-05	1.37244e-05	0.000328753	C5ar1/Il1b/Mt1/Mt2/Marcksl1/Abl2/Rab20/Tgm2/Slc41a1/Atf4/Slc12a7/Myc/Jak3/Steap4/Cx3cl1/Gpr65/Gna13/Grin2c/P2ry6/Grin1/Cxcl2/Cxcl1/Trpv4/Ccr7/Adora2a/Tfrc/Grik2/Atp2b2/Cxcr5/Plch2/Prnp/Cacna2d1/Adcy5/Ryr2/Adm/Lck/S100b	37
GO:0002292	T cell differentiation involved in immune response	11/479	53/11002	1.37625e-05	1.37625e-05	0.000328753	Bcl3/Gadd45g/Il4ra/Stat3/Nfkbiz/Irf1/Jak3/Zc3h12a/Nfkbid/Ccr7/Il6	11
GO:0098609	cell-cell adhesion	38/479	419/11002	1.38598e-05	1.38598e-05	0.000328753	Il1b/Gcnt2/Cd83/Runx1/Il4ra/Pvr/Icam1/Abl2/Tnf/Nfkbiz/Klf4/Irf1/Slamf1/Cebpb/Srf/Jak3/Rela/Xbp1/Gtpbp4/Comp/Zc3h12a/Cx3cl1/Hsp90aa1/Flot1/Vmp1/Traf6/Itgb7/Nfkbid/Trpv4/Ccr7/Adora2a/Tfrc/Il6/Prnp/Lck/Ptprd/Tyro3/Pcdhgc3	38
GO:0030003	cellular cation homeostasis	34/479	357/11002	1.43611e-05	1.43611e-05	0.0003381	C5ar1/Il1b/Mt1/Mt2/Marcksl1/Abl2/Rab20/Tgm2/Slc41a1/Atf4/Myc/Jak3/Cx3cl1/Gpr65/Gna13/Grin2c/P2ry6/Grin1/Cxcl2/Cxcl1/Trpv4/Ccr7/Tfrc/Grik2/Atp2b2/Cxcr5/Plch2/Prnp/Cacna2d1/Adcy5/Ryr2/Adm/Lck/S100b	34
GO:0009611	response to wounding	29/479	282/11002	1.4791e-05	1.4791e-05	0.000345641	Zfp36/Jun/B4galt1/F3/Klf4/Srf/Hmgcr/Xbp1/Comp/Ninj1/Il1a/Slc1a3/Cx3cl1/Serpine1/Gna13/Ndel1/Epb41l4b/Grin2c/Tnfrsf12a/Vash1/Plet1/Srsf5/Insl3/Cnn2/Trim72/Il6/Mir22hg/Adm/Tyro3	29
GO:0071347	cellular response to interleukin-1	11/479	54/11002	1.66153e-05	1.66153e-05	0.000385418	Egr1/Irf1/Cebpb/Rela/Il1a/Zc3h12a/Cx3cl1/Serpine1/Traf6/Il6/Mapk11	11
GO:0002763	positive regulation of myeloid leukocyte differentiation	10/479	45/11002	1.79766e-05	1.79766e-05	0.000413951	Id2/Fos/Runx1/Jun/Klf10/Tnf/Trib1/Ripk1/Traf6/Ocstamp	10
GO:0032103	positive regulation of response to external stimulus	27/479	256/11002	1.85239e-05	1.85239e-05	0.000423465	Ptgs2/C5ar1/Il1b/Cgas/Osm/Nfkbia/Pvr/Myd88/Ticam1/Tgm2/Tnf/Nfkbiz/Slamf1/Cebpb/Il17ra/Polr3d/Tirap/Cx3cl1/Serpine1/Ndel1/Fcgr3/Traf6/Cxcl1/Trpv4/Ccr7/H60b/Il6	27
GO:0098771	inorganic ion homeostasis	37/479	409/11002	1.90619e-05	1.90619e-05	0.000432628	C5ar1/Il1b/Mt1/Mt2/Marcksl1/Abl2/Rab20/Tgm2/Slc41a1/Atf4/Slc12a7/Myc/Jak3/Steap4/Cx3cl1/Gpr65/Gna13/Grin2c/P2ry6/Grin1/Cxcl2/Cxcl1/Trpv4/Ccr7/Adora2a/Tfrc/Grik2/Atp2b2/Cxcr5/Plch2/Prnp/Cacna2d1/Adcy5/Ryr2/Adm/Lck/S100b	37
GO:0043372	positive regulation of CD4-positive, alpha-beta T cell differentiation	7/479	21/11002	1.93789e-05	1.93789e-05	0.000435929	Cd83/Il4ra/Nfkbiz/Irf1/Nfkbid/Ccr7/Il6	7
GO:1903531	negative regulation of secretion by cell	18/479	134/11002	1.94837e-05	1.94837e-05	0.000435929	Il1b/Osm/Midn/Notch1/Srgn/Tnf/Slamf1/Hmgcr/Rabgef1/Pim3/Ucp2/Zc3h12a/Cx3cl1/Klf7/Trim9/Il6/Cyp51/Kalrn	18
GO:0035249	synaptic transmission, glutamatergic	11/479	55/11002	1.99667e-05	1.99667e-05	0.00044359	Ptgs2/Homer1/Grin1/Grm4/Shank1/Adora2a/Grik2/Kalrn/Syt1/Mapk8ip2/Grik5	11
GO:0045444	fat cell differentiation	20/479	160/11002	2.011e-05	2.011e-05	0.000443649	Id2/Ptgs2/Zfp36/Cebpd/Tnf/Klf4/Nr4a1/Jdp2/Cebpb/Insig1/Xbp1/Mex3c/Steap4/Tcf7l2/Lrg1/Zc3h12a/Egr2/Sh2b2/Trpv4/Metrnl	20
GO:0006873	cellular ion homeostasis	34/479	363/11002	2.03854e-05	2.03854e-05	0.000446602	C5ar1/Il1b/Mt1/Mt2/Marcksl1/Abl2/Rab20/Tgm2/Slc41a1/Atf4/Myc/Jak3/Cx3cl1/Gpr65/Gna13/Grin2c/P2ry6/Grin1/Cxcl2/Cxcl1/Trpv4/Ccr7/Tfrc/Grik2/Atp2b2/Cxcr5/Plch2/Prnp/Cacna2d1/Adcy5/Ryr2/Adm/Lck/S100b	34
GO:0030856	regulation of epithelial cell differentiation	13/479	76/11002	2.12284e-05	2.12284e-05	0.000461863	Zfp36/Il1b/Notch1/Tnf/Cebpb/Btg1/Il1a/Serpine1/Prkx/Errfi1/Id1/Maff/Klf7	13
GO:2000514	regulation of CD4-positive, alpha-beta T cell activation	10/479	46/11002	2.20881e-05	2.20881e-05	0.000477276	Cd83/Runx1/Il4ra/Nfkbiz/Irf1/Jak3/Zc3h12a/Nfkbid/Ccr7/Il6	10
GO:0070374	positive regulation of ERK1 and ERK2 cascade	17/479	123/11002	2.26954e-05	2.26954e-05	0.000487062	C5ar1/Il1b/Gcnt2/Jun/Icam1/Notch1/Abl2/Slamf1/Tirap/Hmgcr/Il1a/Cx3cl1/P2ry6/Trpv4/Dnajc27/Il6/Sema7a	17
GO:0043269	regulation of ion transport	35/479	381/11002	2.32695e-05	2.32695e-05	0.000496008	Ptgs2/Il1b/Rrad/Gem/Icam1/Atf4/Tnf/Cebpb/Irs2/Jak3/Il1a/Homer1/Ripk1/Kcnq2/Cx3cl1/Serpine1/Per1/P2ry6/Grin1/Cxcl1/Kcnab3/Hspa2/Shank1/Adora2a/Atp2b2/Scn2b/Syt2/Prnp/Wnk2/Nedd4/Cacna2d1/Ryr2/Syt1/Sptbn4/Mapk8ip2	35
GO:0034114	regulation of heterotypic cell-cell adhesion	6/479	15/11002	2.36117e-05	2.36117e-05	0.000496592	Il1b/Gcnt2/Tnf/Klf4/Flot1/Lck	6
GO:0045624	positive regulation of T-helper cell differentiation	6/479	15/11002	2.36117e-05	2.36117e-05	0.000496592	Il4ra/Nfkbiz/Irf1/Nfkbid/Ccr7/Il6	6
GO:0001503	ossification	23/479	203/11002	2.47702e-05	2.47702e-05	0.000517507	Id2/Ptgs2/Junb/Cebpd/Sbno2/Nab2/Notch1/Srgn/Klf10/Chsy1/Tnf/Trp53inp2/Cebpb/Rbpj/Comp/Tcf7l2/Jund/Egr2/H3f3b/Traf6/Id1/Il6/Fbxl15	23
GO:0045582	positive regulation of T cell differentiation	12/479	67/11002	2.72667e-05	2.72667e-05	0.000565915	Il1b/Cd83/Runx1/Il4ra/Nfkbiz/Irf1/Xbp1/Hsp90aa1/Nfkbid/Ccr7/Il6/Lck	12
GO:0097530	granulocyte migration	14/479	89/11002	2.7577e-05	2.7577e-05	0.000568616	C5ar1/Il1b/Myd88/Slamf1/Il17ra/Tirap/Il1a/Cx3cl1/Fcgr3/Trem1/Cxcl2/Cxcl1/Trpv4/Ccr7	14
GO:1902532	negative regulation of intracellular signal transduction	35/479	385/11002	2.89977e-05	2.89977e-05	0.000594026	Dusp1/Ptgs2/Il1b/Rcan1/Dusp8/Plaur/Dusp5/Abl2/Mcl1/Litaf/Klf4/Ptpn1/Dusp16/Hmgcr/Rela/Xbp1/Bcl2l1/Ripk1/Rabgef1/Zc3h12a/Per1/Dusp2/Aplp1/Errfi1/Cdkn2d/Paqr3/Nlrx1/Tnfaip8l1/Nfkbid/Pde10a/Prnp/Wnk2/Kctd10/Dok2/Spry4	35
GO:0002694	regulation of leukocyte activation	33/479	354/11002	2.973e-05	2.973e-05	0.000605099	Id2/Il1b/Cd83/Runx1/Il4ra/Cgas/Sphk1/Myd88/Ticam1/Nfkbiz/Irf1/Slamf1/Fas/Cebpb/Irs2/Cd300lf/Tirap/Jak3/Xbp1/Rabgef1/Zc3h12a/Cx3cl1/Hsp90aa1/Traf6/Nfkbid/Ccr7/Adora2a/Tfrc/Il6/Prnp/Ctla2a/Lck/Tyro3	33
GO:0045619	regulation of lymphocyte differentiation	17/479	126/11002	3.11923e-05	3.11923e-05	0.000622622	Id2/Il1b/Cd83/Runx1/Il4ra/Nfkbiz/Irf1/Fas/Jak3/Xbp1/Zc3h12a/Hsp90aa1/Nfkbid/Ccr7/Il6/Ctla2a/Lck	17
GO:0050806	positive regulation of synaptic transmission	17/479	126/11002	3.11923e-05	3.11923e-05	0.000622622	Ptgs2/Sphk1/Tnf/Bcl2l1/Slc1a3/Flot1/Grin2c/Grin1/Shank1/Adora2a/Grik2/Syt2/Rims2/Kalrn/Prnp/Syt1/S100b	17
GO:0002460	adaptive immune response based on somatic recombination of immune receptors built from immunoglobulin superfamily domains	23/479	206/11002	3.13476e-05	3.13476e-05	0.000622622	Arid5a/Il1b/Bcl3/Gadd45g/Il4ra/Pvr/Icam1/Myd88/Stat3/Tnf/Nfkbiz/Irf1/Slamf1/Fas/Jak3/Zc3h12a/Fcgr3/Traf6/Nfkbid/Ccr7/Tfrc/H60b/Il6	23
GO:0050709	negative regulation of protein secretion	14/479	90/11002	3.13804e-05	3.13804e-05	0.000622622	Il1b/Midn/Srgn/Tnf/Slamf1/Hmgcr/Rabgef1/Pim3/Ucp2/Zc3h12a/Cx3cl1/Klf7/Il6/Cyp51	14
GO:0050715	positive regulation of cytokine secretion	15/479	102/11002	3.26523e-05	3.26523e-05	0.000634308	Arid5a/Il1b/Il4ra/Osm/Abl2/Tnf/Casp4/Slamf1/Il17ra/Xbp1/Il1a/Trpv4/Ccr7/Mapk11/Clec4n	15
GO:0032722	positive regulation of chemokine production	10/479	48/11002	3.27736e-05	3.27736e-05	0.000634308	Il1b/Egr1/Il4ra/Myd88/Ticam1/Tnf/Tirap/Il1a/Trpv4/Il6	10
GO:0043620	regulation of DNA-templated transcription in response to stress	10/479	48/11002	3.27736e-05	3.27736e-05	0.000634308	Egr1/Jun/Bach1/Notch1/Atf4/Cebpb/Rbpj/Rela/Ppp1r15a/Atf6	10
GO:0046637	regulation of alpha-beta T cell differentiation	10/479	48/11002	3.27736e-05	3.27736e-05	0.000634308	Cd83/Runx1/Il4ra/Nfkbiz/Irf1/Jak3/Zc3h12a/Nfkbid/Ccr7/Il6	10
GO:0051249	regulation of lymphocyte activation	29/479	295/11002	3.4487e-05	3.4487e-05	0.0006634	Id2/Il1b/Cd83/Runx1/Il4ra/Cgas/Myd88/Ticam1/Nfkbiz/Irf1/Slamf1/Fas/Cebpb/Irs2/Tirap/Jak3/Xbp1/Zc3h12a/Hsp90aa1/Traf6/Nfkbid/Ccr7/Adora2a/Tfrc/Il6/Prnp/Ctla2a/Lck/Tyro3	29
GO:0046631	alpha-beta T cell activation	16/479	115/11002	3.62258e-05	3.62258e-05	0.000691257	Bcl3/Gadd45g/Cd83/Runx1/Il4ra/Abl2/Stat3/Nfkbiz/Irf1/Cebpb/Jak3/Zc3h12a/Nfkbid/Ccr7/Adora2a/Il6	16
GO:0010575	positive regulation of vascular endothelial growth factor production	6/479	16/11002	3.63951e-05	3.63951e-05	0.000691257	Ptgs2/C5ar1/Il1b/Atf4/Il1a/Il6	6
GO:0030001	metal ion transport	39/479	454/11002	3.66962e-05	3.66962e-05	0.000691257	Ptgs2/Rrad/Marcksl1/Gem/Icam1/Slc41a1/Atf4/Slc12a7/Jak3/Steap4/Homer1/Slc10a6/Slc1a3/Kcnq2/Cx3cl1/Serpine1/Per1/Grin2c/P2ry6/Grin1/Slc25a25/Cxcl1/Kcnab3/Hspa2/Trpv4/Slc20a1/Adora2a/Tfrc/Atp2b2/Scn2b/Plch2/Prnp/Wnk2/Nedd4/Cacna2d1/Pkd1l3/Ryr2/Sptbn4/Lck	39
GO:0032755	positive regulation of interleukin-6 production	12/479	69/11002	3.70308e-05	3.70308e-05	0.000691257	Arid5a/Il1b/Myd88/Ticam1/Stat3/Tnf/Tirap/Xbp1/Il1a/Traf6/Trpv4/Il6	12
GO:0042136	neurotransmitter biosynthetic process	12/479	69/11002	3.70308e-05	3.70308e-05	0.000691257	Ptgs2/Il1b/Icam1/Ticam1/Tnf/Klf4/Zc3h12a/Slc1a3/Hsp90aa1/Gch1/Tha1/Il6	12
GO:1900745	positive regulation of p38MAPK cascade	7/479	23/11002	3.78698e-05	3.78698e-05	0.00070276	Il1b/Gadd45g/Sphk1/Gadd45b/Zc3h12a/Gadd45a/Ncf1	7
GO:1904950	negative regulation of establishment of protein localization	18/479	141/11002	3.91082e-05	3.91082e-05	0.000721497	Il1b/Midn/Srgn/Tnf/Slamf1/Insig1/Hmgcr/Rabgef1/Pim3/Ucp2/Zc3h12a/Cx3cl1/Snx12/Klf7/Il6/Cyp51/Coro2b/Pkia	18
GO:0043405	regulation of MAP kinase activity	23/479	209/11002	3.9456e-05	3.9456e-05	0.000723683	Dusp1/Il1b/Gadd45g/Dusp8/Dusp5/Map2k3/Tnf/Ptpn1/Dusp16/Gadd45b/Tirap/Hmgcr/Trib1/Ripk1/Gadd45a/Dusp2/Traf6/Paqr3/Grm4/Ccr7/Map3k6/Lpar2/Spry4	23
GO:0007519	skeletal muscle tissue development	15/479	104/11002	4.12273e-05	4.12273e-05	0.000751799	Fos/Egr1/Rcan1/Notch1/Nr4a1/Skil/Myc/Hmgcr/Homer1/Tcf7l2/Meg3/Egr2/Flot1/Maff/S100b	15
GO:0051966	regulation of synaptic transmission, glutamatergic	9/479	40/11002	4.26338e-05	4.26338e-05	0.00077003	Ptgs2/Homer1/Grm4/Shank1/Adora2a/Grik2/Kalrn/Syt1/Mapk8ip2	9
GO:0002286	T cell activation involved in immune response	12/479	70/11002	4.29593e-05	4.29593e-05	0.00077003	Bcl3/Gadd45g/Il4ra/Icam1/Stat3/Nfkbiz/Irf1/Jak3/Zc3h12a/Nfkbid/Ccr7/Il6	12
GO:2001237	negative regulation of extrinsic apoptotic signaling pathway	12/479	70/11002	4.29593e-05	4.29593e-05	0.00077003	Il1b/Icam1/Mcl1/Siah2/Tnf/Rela/Bcl2l1/Ripk1/Cx3cl1/Serpine1/Itprip/Tmbim1	12
GO:0014706	striated muscle tissue development	25/479	239/11002	4.32627e-05	4.32627e-05	0.000771087	Pim1/Id2/Kdm6b/Fos/Egr1/Rcan1/Notch1/Nr4a1/Skil/Rbpj/Myc/Srf/Hmgcr/Homer1/Ripk1/Tcf7l2/Meg3/Egr2/Flot1/Maff/Myom1/Mapk11/Ryr2/Dll4/S100b	25
GO:0002699	positive regulation of immune effector process	20/479	170/11002	4.87087e-05	4.87087e-05	0.000863276	Arid5a/Il1b/Il4ra/Pvr/Ticam1/Tnf/Nfkbiz/Irf1/Xbp1/Ddx21/Rabgef1/Fcgr3/Traf6/Cxcl1/Nfkbid/Ccr7/Tfrc/H60b/Il6/Sema7a	20
GO:0010038	response to metal ion	19/479	157/11002	5.07788e-05	5.07788e-05	0.000894936	Id2/Junb/Fos/Mt1/Mt2/Jun/Slc41a1/Fas/Il1a/Homer1/Jund/Ncf1/Nptx1/Tfrc/Syt2/Prnp/Ryr2/Syt1/Lck	19
GO:0045580	regulation of T cell differentiation	15/479	106/11002	5.17226e-05	5.17226e-05	0.000906506	Il1b/Cd83/Runx1/Il4ra/Nfkbiz/Irf1/Jak3/Xbp1/Zc3h12a/Hsp90aa1/Nfkbid/Ccr7/Il6/Ctla2a/Lck	15
GO:0033673	negative regulation of kinase activity	20/479	172/11002	5.75784e-05	5.75784e-05	0.00100188	Dusp1/Il1b/Gadd45g/Dusp8/Dusp5/Midn/Ptpn1/Irs2/Dusp16/Gadd45b/Hmgcr/Trib1/Gadd45a/Dusp2/Errfi1/Paqr3/Adora2a/Il6/Pkia/Spry4	20
GO:0071241	cellular response to inorganic substance	15/479	107/11002	5.77993e-05	5.77993e-05	0.00100188	Id2/Junb/Fos/Mt1/Mt2/Jun/Slc41a1/Fas/Jund/Ncf1/Nptx1/Tfrc/Syt2/Prnp/Syt1	15
GO:0042133	neurotransmitter metabolic process	14/479	95/11002	5.81429e-05	5.81429e-05	0.00100233	Ptgs2/Il1b/Icam1/Ticam1/Tnf/Klf4/Zc3h12a/Slc1a3/Hsp90aa1/Gch1/Tha1/Chka/Atp2b2/Il6	14
GO:0051048	negative regulation of secretion	18/479	146/11002	6.23585e-05	6.23585e-05	0.00106916	Il1b/Osm/Midn/Notch1/Srgn/Tnf/Slamf1/Hmgcr/Rabgef1/Pim3/Ucp2/Zc3h12a/Cx3cl1/Klf7/Trim9/Il6/Cyp51/Kalrn	18
GO:0009725	response to hormone	36/479	416/11002	6.30942e-05	6.30942e-05	0.00107592	Socs3/Fosl2/Zfp36/Junb/Il1b/Egr1/Ugcg/Jun/Notch1/Stat3/Tnf/Nr4a1/Irf1/Fas/Socs2/Ptpn1/Irs2/Srf/Mat2a/Rela/Xbp1/Jund/Paqr8/Cish/Egr2/Myo1c/Sh2b2/Cpeb2/Per1/Ndel1/P2ry6/Trpv4/Ccr7/Srsf5/Trim72/Il6	36
GO:0032655	regulation of interleukin-12 production	9/479	42/11002	6.43339e-05	6.43339e-05	0.00107707	Irf1/Slamf1/Tirap/Jak3/Rela/Traf6/Ccr7/Rel/Mapk11	9
GO:0099565	chemical synaptic transmission, postsynaptic	11/479	62/11002	6.43934e-05	6.43934e-05	0.00107707	Cx3cl1/Sez6/Grin2c/Grin1/Syne1/Shank1/Adora2a/Grik2/Rims2/Mapk8ip2/Grik5	11
GO:0060538	skeletal muscle organ development	15/479	108/11002	6.44931e-05	6.44931e-05	0.00107707	Fos/Egr1/Rcan1/Notch1/Nr4a1/Skil/Myc/Hmgcr/Homer1/Tcf7l2/Meg3/Egr2/Flot1/Maff/S100b	15
GO:0035924	cellular response to vascular endothelial growth factor stimulus	8/479	33/11002	6.45271e-05	6.45271e-05	0.00107707	Sphk1/Notch1/Map2k3/Nr4a1/Rela/Xbp1/Myo1c/Dll4	8
GO:0071621	granulocyte chemotaxis	12/479	73/11002	6.59383e-05	6.59383e-05	0.00109483	C5ar1/Il1b/Slamf1/Il17ra/Tirap/Cx3cl1/Fcgr3/Trem1/Cxcl2/Cxcl1/Trpv4/Ccr7	12
GO:0070848	response to growth factor	32/479	353/11002	6.74391e-05	6.74391e-05	0.00111389	Ier2/Zfp36/Fos/Egr1/Gcnt2/Zyx/Runx1/Jun/Sphk1/Notch1/Map2k3/Klf4/Nr4a1/Skil/Rbpj/Ptpn1/Rela/Xbp1/Comp/Ripk1/Tcf7l2/Lrg1/Myo1c/Serpine1/Ptpn12/Id1/Il6/Nedd4/Ryr2/Fbxl15/Dll4/Spry4	32
GO:0043407	negative regulation of MAP kinase activity	10/479	52/11002	6.77954e-05	6.77954e-05	0.00111394	Dusp1/Il1b/Dusp8/Dusp5/Ptpn1/Dusp16/Hmgcr/Dusp2/Paqr3/Spry4	10
GO:2000516	positive regulation of CD4-positive, alpha-beta T cell activation	7/479	25/11002	6.88318e-05	6.88318e-05	0.00112511	Cd83/Il4ra/Nfkbiz/Irf1/Nfkbid/Ccr7/Il6	7
GO:0030335	positive regulation of cell migration	33/479	370/11002	7.14344e-05	7.14344e-05	0.00116163	Sema6b/Ptgs2/C5ar1/Il1b/Egr1/Gcnt2/Jun/Sphk1/Icam1/Notch1/Map2k3/Stat3/F3/Slamf1/Myc/Irs2/Tirap/Adamts1/Xbp1/Il1a/Sema4c/Zc3h12a/Cx3cl1/Myo1c/Serpine1/Epb41l4b/P2ry6/Grin1/Trpv4/Ccr7/Plet1/Insl3/Sema7a	33
GO:0048871	multicellular organismal homeostasis	27/479	277/11002	7.41775e-05	7.41775e-05	0.00120005	Ptgs2/Il1b/Kdm6b/Gadd45g/Egr1/Gcnt2/Ugcg/Il4ra/Notch1/Stat3/Atf4/Tnf/Trp53inp2/Cebpb/Rbpj/Srf/Mex3c/Il1a/Homer1/Ucp2/Traf6/Id1/Trpv4/Tfrc/Il6/Map1a/Metrnl	27
GO:0043618	regulation of transcription from RNA polymerase II promoter in response to stress	9/479	43/11002	7.82704e-05	7.82704e-05	0.00124146	Egr1/Jun/Bach1/Notch1/Atf4/Cebpb/Rbpj/Ppp1r15a/Atf6	9
GO:0046888	negative regulation of hormone secretion	9/479	43/11002	7.82704e-05	7.82704e-05	0.00124146	Il1b/Osm/Midn/Hmgcr/Pim3/Ucp2/Klf7/Il6/Kalrn	9
GO:0042226	interleukin-6 biosynthetic process	6/479	18/11002	7.83107e-05	7.83107e-05	0.00124146	Il1b/Stat3/Tnf/Cebpb/Tirap/Traf6	6
GO:0045408	regulation of interleukin-6 biosynthetic process	6/479	18/11002	7.83107e-05	7.83107e-05	0.00124146	Il1b/Stat3/Tnf/Cebpb/Tirap/Traf6	6
GO:0009913	epidermal cell differentiation	13/479	86/11002	8.13297e-05	8.13297e-05	0.00128287	Fosl2/Ptgs2/Zfp36/Ugcg/Tgm1/Notch1/Klf4/Rbpj/Il1a/Errfi1/Maff/Klf7/Atp2b2	13
GO:0051272	positive regulation of cellular component movement	34/479	389/11002	8.30112e-05	8.30112e-05	0.00130259	Sema6b/Ptgs2/C5ar1/Il1b/Egr1/Gcnt2/Jun/Sphk1/Icam1/Notch1/Map2k3/Stat3/F3/Slamf1/Myc/Irs2/Tirap/Adamts1/Xbp1/Il1a/Sema4c/Zc3h12a/Cx3cl1/Myo1c/Serpine1/Epb41l4b/P2ry6/Grin1/Trpv4/Ccr7/Plet1/Insl3/Trim46/Sema7a	34
GO:0051224	negative regulation of protein transport	17/479	136/11002	8.3406e-05	8.3406e-05	0.00130259	Il1b/Midn/Srgn/Tnf/Slamf1/Insig1/Hmgcr/Rabgef1/Pim3/Ucp2/Zc3h12a/Cx3cl1/Snx12/Klf7/Il6/Cyp51/Pkia	17
GO:0071900	regulation of protein serine/threonine kinase activity	29/479	310/11002	8.48179e-05	8.48179e-05	0.00131812	Pim1/Dusp1/Il1b/Gadd45g/Dusp8/Dusp5/Map2k3/Tnf/Ptpn1/Dusp16/Gadd45b/Tirap/Hmgcr/Trib1/Gtpbp4/Ripk1/Gadd45a/Dusp2/Ccnd2/Cdkn2d/Traf6/Paqr3/Grm4/Ccr7/Ccnl1/Map3k6/Pkia/Lpar2/Spry4	29
GO:0032642	regulation of chemokine production	11/479	64/11002	8.70858e-05	8.70858e-05	0.00134673	Il1b/Egr1/Il4ra/Myd88/Ticam1/Tnf/Klf4/Tirap/Il1a/Trpv4/Il6	11
GO:0071363	cellular response to growth factor stimulus	31/479	342/11002	8.76979e-05	8.76979e-05	0.00134958	Zfp36/Fos/Egr1/Gcnt2/Zyx/Runx1/Jun/Sphk1/Notch1/Map2k3/Klf4/Nr4a1/Skil/Rbpj/Ptpn1/Rela/Xbp1/Comp/Ripk1/Tcf7l2/Lrg1/Myo1c/Serpine1/Ptpn12/Id1/Il6/Nedd4/Ryr2/Fbxl15/Dll4/Spry4	31
GO:0002573	myeloid leukocyte differentiation	18/479	150/11002	8.90266e-05	8.90266e-05	0.00136338	Id2/Junb/Fos/Sbno2/Runx1/Jun/Klf10/Tnf/Cebpb/Rbpj/Myc/Cd300lf/Trib1/Ripk1/Traf6/Ccr7/Tfrc/Ocstamp	18
GO:0032735	positive regulation of interleukin-12 production	7/479	26/11002	9.06896e-05	9.06896e-05	0.00138213	Irf1/Tirap/Rela/Traf6/Ccr7/Rel/Mapk11	7
GO:0043409	negative regulation of MAPK cascade	16/479	124/11002	9.16387e-05	9.16387e-05	0.00138593	Dusp1/Il1b/Dusp8/Dusp5/Klf4/Ptpn1/Dusp16/Hmgcr/Xbp1/Per1/Dusp2/Errfi1/Paqr3/Wnk2/Dok2/Spry4	16
GO:0007610	behavior	34/479	391/11002	9.18175e-05	9.18175e-05	0.00138593	Id2/Ptgs2/Il1b/Egr1/Rcan1/Runx1/Jun/Osm/Abl2/Stat3/Srf/Hmgcr/Homer1/Slc1a3/Egr2/Sez6/Ccnd2/Grin1/Grm4/Shank1/Adora2a/Grik2/Atp2b2/Il6/Kalrn/Map1a/Prnp/Sptbn2/Adcy5/Lgi4/Sez6l2/Sptbn4/Mapk8ip2/S100b	34
GO:0035994	response to muscle stretch	5/479	12/11002	9.40761e-05	9.40761e-05	0.00141051	Fos/Jun/Nfkbia/Rela/Ryr2	5
GO:0032615	interleukin-12 production	9/479	44/11002	9.46582e-05	9.46582e-05	0.00141051	Irf1/Slamf1/Tirap/Jak3/Rela/Traf6/Ccr7/Rel/Mapk11	9
GO:0045859	regulation of protein kinase activity	40/479	491/11002	9.47872e-05	9.47872e-05	0.00141051	Pim1/Dusp1/C5ar1/Il1b/Gadd45g/Egr1/Map3k8/Dusp8/Dusp5/Nab2/Map2k3/Tnf/Ptpn1/Dusp16/Gadd45b/Tirap/Hmgcr/Trib1/Gtpbp4/Ripk1/Gadd45a/Hsp90aa1/Dusp2/Ccnd2/Ncf1/Errfi1/Cdkn2d/Traf6/Paqr3/Grm4/Ccr7/Ccnl1/Adora2a/Il6/Map3k6/Prnp/Pkia/Lrp8/Lpar2/Spry4	40
GO:0050863	regulation of T cell activation	22/479	207/11002	9.76221e-05	9.76221e-05	0.00144588	Il1b/Cd83/Runx1/Il4ra/Cgas/Nfkbiz/Irf1/Slamf1/Cebpb/Jak3/Xbp1/Zc3h12a/Hsp90aa1/Traf6/Nfkbid/Ccr7/Adora2a/Tfrc/Il6/Prnp/Ctla2a/Lck	22
GO:0032602	chemokine production	11/479	65/11002	0.000100788	0.000100788	0.00148579	Il1b/Egr1/Il4ra/Myd88/Ticam1/Tnf/Klf4/Tirap/Il1a/Trpv4/Il6	11
GO:0046638	positive regulation of alpha-beta T cell differentiation	8/479	35/11002	0.000101305	0.000101305	0.00148646	Cd83/Runx1/Il4ra/Nfkbiz/Irf1/Nfkbid/Ccr7/Il6	8
GO:0007259	receptor signaling pathway via JAK-STAT	13/479	88/11002	0.000103636	0.000103636	0.00150666	Socs3/Bcl3/Osm/Notch1/Stat3/Tnf/Irf1/Socs2/Jak3/Jak1/Il6/Lck/Ptprd	13
GO:0045598	regulation of fat cell differentiation	13/479	88/11002	0.000103636	0.000103636	0.00150666	Id2/Ptgs2/Zfp36/Tnf/Jdp2/Cebpb/Insig1/Xbp1/Mex3c/Tcf7l2/Zc3h12a/Trpv4/Metrnl	13
GO:2000147	positive regulation of cell motility	33/479	378/11002	0.000107919	0.000107919	0.00156173	Sema6b/Ptgs2/C5ar1/Il1b/Egr1/Gcnt2/Jun/Sphk1/Icam1/Notch1/Map2k3/Stat3/F3/Slamf1/Myc/Irs2/Tirap/Adamts1/Xbp1/Il1a/Sema4c/Zc3h12a/Cx3cl1/Myo1c/Serpine1/Epb41l4b/P2ry6/Grin1/Trpv4/Ccr7/Plet1/Insl3/Sema7a	33
GO:0007162	negative regulation of cell adhesion	20/479	180/11002	0.000109155	0.000109155	0.0015724	Dusp1/Gcnt2/Runx1/Il4ra/Notch1/Abl2/Rnd1/Klf4/Irf1/Cebpb/Jak3/Gtpbp4/Zc3h12a/Serpine1/Nfkbid/Trpv4/Plet1/Adora2a/Prnp/Coro2b	20
GO:0050865	regulation of cell activation	33/479	380/11002	0.000119341	0.000119341	0.00171131	Id2/Il1b/Cd83/Runx1/Il4ra/Cgas/Sphk1/Myd88/Ticam1/Nfkbiz/Irf1/Slamf1/Fas/Cebpb/Irs2/Cd300lf/Tirap/Jak3/Xbp1/Rabgef1/Zc3h12a/Cx3cl1/Hsp90aa1/Traf6/Nfkbid/Ccr7/Adora2a/Tfrc/Il6/Prnp/Ctla2a/Lck/Tyro3	33
GO:0045429	positive regulation of nitric oxide biosynthetic process	8/479	36/11002	0.00012535	0.00012535	0.00178935	Ptgs2/Il1b/Icam1/Ticam1/Tnf/Klf4/Hsp90aa1/Il6	8
GO:0045621	positive regulation of lymphocyte differentiation	12/479	78/11002	0.000127855	0.000127855	0.00181689	Il1b/Cd83/Runx1/Il4ra/Nfkbiz/Irf1/Xbp1/Hsp90aa1/Nfkbid/Ccr7/Il6/Lck	12
GO:1901652	response to peptide	26/479	271/11002	0.000130377	0.000130377	0.00182922	Socs3/Il1b/Egr1/Nfkbia/Icam1/Notch1/Stat3/Nr4a1/Casp4/Irf1/Socs2/Ptpn1/Irs2/Rela/Xbp1/Cish/Egr2/Myo1c/Sh2b2/Cpeb2/Ndel1/Trpv4/Srsf5/Trim72/Prnp/Cacna2d1	26
GO:0060079	excitatory postsynaptic potential	10/479	56/11002	0.000130533	0.000130533	0.00182922	Sez6/Grin2c/Grin1/Syne1/Shank1/Adora2a/Grik2/Rims2/Mapk8ip2/Grik5	10
GO:1990823	response to leukemia inhibitory factor	13/479	90/11002	0.000131042	0.000131042	0.00182922	Socs3/Sbno2/Nfyb/Icam1/Klf4/Ildr1/Mat2a/Xbp1/Eed/Eef1e1/Tfrc/Pfkp/Spry4	13
GO:1990830	cellular response to leukemia inhibitory factor	13/479	90/11002	0.000131042	0.000131042	0.00182922	Socs3/Sbno2/Nfyb/Icam1/Klf4/Ildr1/Mat2a/Xbp1/Eed/Eef1e1/Tfrc/Pfkp/Spry4	13
GO:0001659	temperature homeostasis	15/479	115/11002	0.000133485	0.000133485	0.00184289	Ptgs2/Il1b/Kdm6b/Gadd45g/Egr1/Il4ra/Notch1/Stat3/Atf4/Tnf/Cebpb/Rbpj/Il1a/Ucp2/Id1	15
GO:0050679	positive regulation of epithelial cell proliferation	15/479	115/11002	0.000133485	0.000133485	0.00184289	C5ar1/Tgm1/Jun/Notch1/Stat3/B4galt1/F3/Nr4a1/Myc/Xbp1/Tcf7l2/Lrg1/Ccnd2/Id1/Il6	15
GO:0060078	regulation of postsynaptic membrane potential	11/479	67/11002	0.000133774	0.000133774	0.00184289	Cx3cl1/Sez6/Grin2c/Grin1/Syne1/Shank1/Adora2a/Grik2/Rims2/Mapk8ip2/Grik5	11
GO:1903428	positive regulation of reactive oxygen species biosynthetic process	9/479	46/11002	0.000136144	0.000136144	0.00185959	Ptgs2/Il1b/Icam1/Ticam1/Tnf/Klf4/Hsp90aa1/Grin1/Il6	9
GO:0006469	negative regulation of protein kinase activity	18/479	155/11002	0.000136165	0.000136165	0.00185959	Dusp1/Il1b/Gadd45g/Dusp8/Dusp5/Ptpn1/Dusp16/Gadd45b/Hmgcr/Trib1/Gadd45a/Dusp2/Errfi1/Paqr3/Adora2a/Il6/Pkia/Spry4	18
GO:0040017	positive regulation of locomotion	33/479	383/11002	0.000138521	0.000138521	0.00187807	Sema6b/Ptgs2/C5ar1/Il1b/Egr1/Gcnt2/Jun/Sphk1/Icam1/Notch1/Map2k3/Stat3/F3/Slamf1/Myc/Irs2/Tirap/Adamts1/Xbp1/Il1a/Sema4c/Zc3h12a/Cx3cl1/Myo1c/Serpine1/Epb41l4b/P2ry6/Grin1/Trpv4/Ccr7/Plet1/Insl3/Sema7a	33
GO:0019932	second-messenger-mediated signaling	22/479	212/11002	0.000138709	0.000138709	0.00187807	Rcan1/Mt1/Mt2/Cgas/Sphk1/Tnf/Gpr65/Gna13/Aplp1/P2ry6/Ccr7/Pde10a/Insl3/Rundc3a/Adora2a/Rasd1/Cxcr5/Rims2/Prnp/Adcy5/Ryr2/Adm	22
GO:0043086	negative regulation of catalytic activity	35/479	416/11002	0.000139584	0.000139584	0.00188185	Dusp1/Ptgs2/Zfp36/Il1b/Gadd45g/Dusp8/Plaur/Dusp5/Midn/Notch1/Siah2/Tnf/Klf4/Nr4a1/Ptpn1/Irs2/Dusp16/Gadd45b/Hmgcr/Trib1/Gadd45a/Serpine1/Dusp2/Ppp1r15a/Errfi1/Cdkn2d/Tmbim1/Paqr3/Adora2a/Il6/Prnp/Lmtk3/Pkia/Cnn3/Spry4	35
GO:0031214	biomineral tissue development	12/479	79/11002	0.000144922	0.000144922	0.0019218	Ptgs2/Sbno2/Notch1/Srgn/Klf10/Atf4/Cebpb/Comp/Tcf7l2/Slc20a1/Atp2b2/Fbxl15	12
GO:0110148	biomineralization	12/479	79/11002	0.000144922	0.000144922	0.0019218	Ptgs2/Sbno2/Notch1/Srgn/Klf10/Atf4/Cebpb/Comp/Tcf7l2/Slc20a1/Atp2b2/Fbxl15	12
GO:0097696	receptor signaling pathway via STAT	13/479	91/11002	0.000146943	0.000146943	0.0019218	Socs3/Bcl3/Osm/Notch1/Stat3/Tnf/Irf1/Socs2/Jak3/Jak1/Il6/Lck/Ptprd	13
GO:0002822	regulation of adaptive immune response based on somatic recombination of immune receptors built from immunoglobulin superfamily domains	16/479	129/11002	0.000147108	0.000147108	0.0019218	Arid5a/Il1b/Il4ra/Pvr/Tnf/Nfkbiz/Irf1/Slamf1/Jak3/Zc3h12a/Fcgr3/Traf6/Nfkbid/Ccr7/Tfrc/Il6	16
GO:0050870	positive regulation of T cell activation	16/479	129/11002	0.000147108	0.000147108	0.0019218	Il1b/Cd83/Runx1/Il4ra/Nfkbiz/Irf1/Slamf1/Jak3/Xbp1/Hsp90aa1/Traf6/Nfkbid/Ccr7/Tfrc/Il6/Lck	16
GO:0002695	negative regulation of leukocyte activation	15/479	116/11002	0.000147313	0.000147313	0.0019218	Id2/Runx1/Il4ra/Irf1/Fas/Cebpb/Cd300lf/Jak3/Rabgef1/Zc3h12a/Cx3cl1/Nfkbid/Adora2a/Prnp/Tyro3	15
GO:0000188	inactivation of MAPK activity	5/479	13/11002	0.000147422	0.000147422	0.0019218	Dusp1/Dusp8/Dusp5/Dusp16/Dusp2	5
GO:0032740	positive regulation of interleukin-17 production	5/479	13/11002	0.000147422	0.000147422	0.0019218	Arid5a/Osm/Sphk1/Myd88/Il6	5
GO:0002825	regulation of T-helper 1 type immune response	6/479	20/11002	0.00015178	0.00015178	0.00196046	Arid5a/Il1b/Il4ra/Irf1/Jak3/Ccr7	6
GO:0006953	acute-phase response	6/479	20/11002	0.00015178	0.00015178	0.00196046	Ptgs2/Il1b/Stat3/Tnf/Il1a/Il6	6
GO:0002718	regulation of cytokine production involved in immune response	10/479	57/11002	0.000152252	0.000152252	0.00196046	Arid5a/Il1b/Ticam1/Tnf/Slamf1/Jak3/Ddx21/Traf6/Il6/Sema7a	10
GO:1904407	positive regulation of nitric oxide metabolic process	8/479	37/11002	0.000153918	0.000153918	0.00197386	Ptgs2/Il1b/Icam1/Ticam1/Tnf/Klf4/Hsp90aa1/Il6	8
GO:0071396	cellular response to lipid	28/479	305/11002	0.00015465	0.00015465	0.00197522	Pim1/Arid5a/Zfp36/Il1b/Sbno2/Nfkbia/Abl2/Myd88/Ticam1/Tnf/Litaf/Cebpb/Insig1/Rela/Xbp1/Trib1/Zc3h12a/Cx3cl1/Serpine1/Gch1/Per1/P2ry6/Traf6/Cxcl2/Cxcl1/Gramd1a/Il6/Adcy5	28
GO:0008544	epidermis development	17/479	143/11002	0.000155927	0.000155927	0.00198351	Fosl2/Ptgs2/Zfp36/Ugcg/Tgm1/Runx1/Nab2/Notch1/Tnf/Klf4/Rbpj/Rela/Il1a/Errfi1/Maff/Klf7/Atp2b2	17
GO:0002700	regulation of production of molecular mediator of immune response	14/479	104/11002	0.000158095	0.000158095	0.00200301	Arid5a/Il1b/Il4ra/Cgas/Ticam1/Tnf/Slamf1/Jak3/Xbp1/Ddx21/Traf6/Tfrc/Il6/Sema7a	14
GO:0042391	regulation of membrane potential	23/479	229/11002	0.000160978	0.000160978	0.00203137	Jun/Tnf/Myc/Bcl2l1/Ucp2/Kcnq2/Cx3cl1/Sez6/Grin2c/Grin1/Gabrd/Syne1/Shank1/Adora2a/Grik2/Scn2b/Il6/Rims2/Cacna2d1/Ryr2/Cntnap1/Mapk8ip2/Grik5	23
GO:0051348	negative regulation of transferase activity	21/479	200/11002	0.000166041	0.000166041	0.00208692	Dusp1/Zfp36/Il1b/Gadd45g/Dusp8/Dusp5/Midn/Ptpn1/Irs2/Dusp16/Gadd45b/Hmgcr/Trib1/Gadd45a/Dusp2/Errfi1/Paqr3/Adora2a/Il6/Pkia/Spry4	21
GO:0010959	regulation of metal ion transport	23/479	230/11002	0.000171775	0.000171775	0.00215041	Ptgs2/Rrad/Gem/Icam1/Atf4/Jak3/Homer1/Cx3cl1/Serpine1/Per1/P2ry6/Grin1/Cxcl1/Hspa2/Adora2a/Atp2b2/Scn2b/Prnp/Wnk2/Nedd4/Cacna2d1/Ryr2/Sptbn4	23
GO:0045639	positive regulation of myeloid cell differentiation	11/479	69/11002	0.000175528	0.000175528	0.00218871	Id2/Fos/Runx1/Jun/Klf10/Stat3/Tnf/Trib1/Ripk1/Traf6/Ocstamp	11
GO:2001236	regulation of extrinsic apoptotic signaling pathway	15/479	118/11002	0.000178744	0.000178744	0.00222004	Il1b/Icam1/Mcl1/Siah2/Tnf/Skil/Jak3/Rela/Bcl2l1/Ripk1/Cx3cl1/Serpine1/Itprip/Tmbim1/Tnfrsf12a	15
GO:0097529	myeloid leukocyte migration	16/479	132/11002	0.00019287	0.00019287	0.00238609	Dusp1/C5ar1/Il1b/Myd88/Slamf1/Il17ra/Tirap/Il1a/Cx3cl1/Serpine1/Fcgr3/Trem1/Cxcl2/Cxcl1/Trpv4/Ccr7	16
GO:0030099	myeloid cell differentiation	26/479	278/11002	0.000196743	0.000196743	0.0024245	Id2/Zfp36/Junb/Fos/Sbno2/Runx1/Jun/Nfkbia/Klf10/Stat3/Tnf/Fas/Cebpb/Rbpj/Myc/Cd300lf/Tirap/Srf/Jak3/Trib1/Ripk1/Prkx/Traf6/Ccr7/Tfrc/Ocstamp	26
GO:1901699	cellular response to nitrogen compound	33/479	391/11002	0.00020393	0.00020393	0.00250329	Socs3/Il1b/Egr1/Cgas/Icam1/Stat3/Atf4/Tnf/Pde12/Nr4a1/Casp4/Irf1/Cebpb/Socs2/Ptpn1/Irs2/Rela/Xbp1/Bcl2l1/Cish/Myo1c/Flot1/Sh2b2/Cpeb2/Ndel1/Aplp1/P2ry6/Trim72/Prnp/Cacna2d1/Adcy5/Ryr2/Nsg2	33
GO:0002675	positive regulation of acute inflammatory response	6/479	21/11002	0.000204741	0.000204741	0.0025035	Ptgs2/Il1b/Tnf/Fcgr3/Ccr7/Il6	6
GO:2000379	positive regulation of reactive oxygen species metabolic process	12/479	82/11002	0.000208302	0.000208302	0.00253721	Ptgs2/Il1b/Icam1/Ticam1/Tnf/Klf4/Zc3h12a/Gadd45a/Hsp90aa1/Grin1/Cxcl1/Il6	12
GO:0042493	response to drug	39/479	493/11002	0.000214042	0.000214042	0.00259431	Junb/Il1b/Kdm6b/Fos/Egr1/Runx1/Jun/Nfkbia/Sphk1/Notch1/Atf4/Tnf/Ppp1r15b/Myc/Mat2a/Rela/Xbp1/Bcl2l1/Homer1/Ripk1/Jund/Zc3h12a/Slc1a3/Serpine1/Grin1/Ccr7/Adora2a/Tfrc/Syt2/Il6/Kalrn/Prnp/Adcy5/Ryr2/Rnf112/Syt1/Slc6a17/Lck/Nsg2	39
GO:0045165	cell fate commitment	14/479	107/11002	0.000214635	0.000214635	0.00259431	Id2/Kdm6b/Runx1/Ets2/Notch1/Stat3/Cebpb/Rbpj/Tcf7l2/Epop/Lbx1/Tead3/Il6/Dll4	14
GO:0043588	skin development	15/479	120/11002	0.000215828	0.000215828	0.00259878	Fosl2/Ptgs2/Zfp36/Ugcg/Tgm1/Runx1/Notch1/Tnf/Rbpj/Srf/Rela/Comp/Il1a/Tcf7l2/Errfi1	15
GO:0030216	keratinocyte differentiation	9/479	49/11002	0.000226069	0.000226069	0.00270832	Fosl2/Ptgs2/Zfp36/Ugcg/Tgm1/Notch1/Rbpj/Il1a/Errfi1	9
GO:0002367	cytokine production involved in immune response	11/479	71/11002	0.000227845	0.000227845	0.00270832	Arid5a/Il1b/Ticam1/Tnf/Slamf1/Jak3/Ddx21/Trem1/Traf6/Il6/Sema7a	11
GO:0032609	interferon-gamma production	11/479	71/11002	0.000227845	0.000227845	0.00270832	Arid5a/Il1b/Bcl3/Gadd45g/Runx1/Abl2/Tnf/Slamf1/Zc3h12a/Ccr7/Prnp	11
GO:0051251	positive regulation of lymphocyte activation	20/479	190/11002	0.000228359	0.000228359	0.00270832	Il1b/Cd83/Runx1/Il4ra/Myd88/Ticam1/Nfkbiz/Irf1/Slamf1/Irs2/Tirap/Jak3/Xbp1/Hsp90aa1/Traf6/Nfkbid/Ccr7/Tfrc/Il6/Lck	20
GO:0042063	gliogenesis	21/479	206/11002	0.00025057	0.00025057	0.00296061	Id2/C5ar1/Il1b/Nab2/Notch1/Abl2/Stat3/Tnf/Fas/Myc/Rela/Tcf7l2/Cx3cl1/Egr2/Grin1/Adora2a/Il6/Lgi4/Rnf112/Cntnap1/Lrp8	21
GO:0050900	leukocyte migration	22/479	221/11002	0.000252413	0.000252413	0.00297125	Dusp1/C5ar1/Il1b/Icam1/Myd88/B4galt1/Tnf/Slamf1/Il17ra/Tirap/Il1a/Rabgef1/Cx3cl1/Serpine1/Fcgr3/Trem1/Cxcl2/Cxcl1/Itgb7/Trpv4/Ccr7/Cxcr5	22
GO:1990266	neutrophil migration	11/479	72/11002	0.000258596	0.000258596	0.00303272	C5ar1/Il1b/Myd88/Tirap/Il1a/Cx3cl1/Fcgr3/Trem1/Cxcl2/Cxcl1/Ccr7	11
GO:0007215	glutamate receptor signaling pathway	9/479	50/11002	0.000265245	0.000265245	0.00309918	Homer1/Cx3cl1/Grin1/Grm4/Shank1/Kalrn/Prnp/Frrs1l/Mapk8ip2	9
GO:0010574	regulation of vascular endothelial growth factor production	6/479	22/11002	0.000271258	0.000271258	0.00315774	Ptgs2/C5ar1/Il1b/Atf4/Il1a/Il6	6
GO:0002761	regulation of myeloid leukocyte differentiation	12/479	85/11002	0.000293916	0.000293916	0.00340893	Id2/Fos/Runx1/Jun/Klf10/Tnf/Cebpb/Myc/Trib1/Ripk1/Traf6/Ocstamp	12
GO:0034113	heterotypic cell-cell adhesion	7/479	31/11002	0.000300091	0.000300091	0.0034678	Il1b/Gcnt2/Tnf/Klf4/Flot1/Itgb7/Lck	7
GO:0045596	negative regulation of cell differentiation	36/479	450/11002	0.000302029	0.000302029	0.00347746	Sema6b/Id2/Zfp36/Il1b/Runx1/Il4ra/Nfkbia/Notch1/Stat3/Tnf/Jdp2/Irf1/Fas/Skil/Rbpj/Myc/Insig1/Jak3/Xbp1/Trib1/Il1a/Sema4c/Tcf7l2/Zc3h12a/Sez6/Lbx1/Ddx6/Paqr3/Nfkbid/Id1/Trpv4/Trim46/Trim72/Inpp5j/Sema7a/S100b	36
GO:0002793	positive regulation of peptide secretion	21/479	209/11002	0.000305535	0.000305535	0.00350503	Arid5a/Il1b/Il4ra/Osm/Abl2/Tnf/Casp4/Slamf1/Ildr1/Il17ra/Irs2/Xbp1/Il1a/Tcf7l2/Trpv4/Ccr7/Adora2a/Il6/Myom1/Mapk11/Clec4n	21
GO:2001234	negative regulation of apoptotic signaling pathway	19/479	180/11002	0.000314078	0.000314078	0.00358998	Ptgs2/Ier3/Il1b/Plaur/Icam1/Mcl1/Siah2/Tnf/Ptpn1/Rela/Xbp1/Bcl2l1/Ripk1/Cx3cl1/Serpine1/Itprip/Cdkn2d/Tmbim1/Mapk8ip2	19
GO:0001956	positive regulation of neurotransmitter secretion	5/479	15/11002	0.000319923	0.000319923	0.00362364	Sphk1/Bcl2l1/Adora2a/Syt2/Syt1	5
GO:0045410	positive regulation of interleukin-6 biosynthetic process	5/479	15/11002	0.000319923	0.000319923	0.00362364	Il1b/Stat3/Tnf/Tirap/Traf6	5
GO:0006816	calcium ion transport	23/479	240/11002	0.000320469	0.000320469	0.00362364	Ptgs2/Rrad/Marcksl1/Gem/Icam1/Jak3/Homer1/Cx3cl1/Serpine1/Grin2c/P2ry6/Grin1/Slc25a25/Hspa2/Trpv4/Adora2a/Atp2b2/Plch2/Prnp/Cacna2d1/Pkd1l3/Ryr2/Lck	23
GO:0014009	glial cell proliferation	8/479	41/11002	0.000326862	0.000326862	0.00368272	Il1b/Notch1/Tnf/Fas/Myc/Cx3cl1/Il6/Lgi4	8
GO:0031400	negative regulation of protein modification process	35/479	436/11002	0.000343065	0.000343065	0.00385153	Socs3/Dusp1/Il1b/Gadd45g/Dusp8/Jun/Dusp5/Tnf/Klf4/Irf1/Ppp1r15b/Ptpn1/Dusp16/Gadd45b/Hmgcr/Rela/Xbp1/Trib1/Gtpbp4/Rabgef1/Zc3h12a/Gadd45a/Per1/Dusp2/Ppp1r15a/Errfi1/Paqr3/Adora2a/Inpp5j/Il6/Prnp/Wnk2/Dok2/Pkia/Spry4	35
GO:0010573	vascular endothelial growth factor production	6/479	23/11002	0.00035363	0.00035363	0.00391442	Ptgs2/C5ar1/Il1b/Atf4/Il1a/Il6	6
GO:0032660	regulation of interleukin-17 production	6/479	23/11002	0.00035363	0.00035363	0.00391442	Arid5a/Osm/Sphk1/Myd88/Il6/Prnp	6
GO:0072538	T-helper 17 type immune response	6/479	23/11002	0.00035363	0.00035363	0.00391442	Arid5a/Stat3/Nfkbiz/Zc3h12a/Nfkbid/Il6	6
GO:1902895	positive regulation of pri-miRNA transcription by RNA polymerase II	6/479	23/11002	0.00035363	0.00035363	0.00391442	Fos/Jun/Stat3/Srf/Rela/Gnl3	6
GO:0045785	positive regulation of cell adhesion	25/479	273/11002	0.000358501	0.000358501	0.00395446	Il1b/Gcnt2/Cd83/Runx1/Il4ra/Icam1/Tgm2/Tnf/Nfkbiz/Irf1/Slamf1/Jak3/Rela/Xbp1/Ninj1/Cx3cl1/Hsp90aa1/Flot1/Epb41l4b/Traf6/Nfkbid/Ccr7/Tfrc/Il6/Lck	25
GO:0045428	regulation of nitric oxide biosynthetic process	9/479	52/11002	0.000360552	0.000360552	0.00395472	Ptgs2/Il1b/Icam1/Ticam1/Tnf/Klf4/Zc3h12a/Hsp90aa1/Il6	9
GO:2001233	regulation of apoptotic signaling pathway	28/479	321/11002	0.000361101	0.000361101	0.00395472	Ptgs2/Ier3/Il1b/Plaur/Osm/Icam1/Mcl1/Siah2/Tnf/Fas/Skil/Ptpn1/Myc/Jak3/Rela/Xbp1/Bcl2l1/Ripk1/Cx3cl1/Serpine1/Itprip/Cdkn2d/Tmbim1/Eef1e1/Tnfrsf12a/Adora2a/Lck/Mapk8ip2	28
GO:1903532	positive regulation of secretion by cell	26/479	289/11002	0.000362285	0.000362285	0.00395472	Arid5a/Il1b/Runx1/Il4ra/Osm/Sphk1/Abl2/Tnf/Casp4/Slamf1/Ildr1/Il17ra/Irs2/Xbp1/Bcl2l1/Il1a/Tcf7l2/Trpv4/Ccr7/Adora2a/Syt2/Il6/Myom1/Mapk11/Syt1/Clec4n	26
GO:0071417	cellular response to organonitrogen compound	30/479	354/11002	0.000367978	0.000367978	0.00400301	Socs3/Il1b/Egr1/Icam1/Stat3/Atf4/Tnf/Nr4a1/Casp4/Irf1/Cebpb/Socs2/Ptpn1/Irs2/Rela/Xbp1/Bcl2l1/Cish/Myo1c/Sh2b2/Cpeb2/Ndel1/Aplp1/P2ry6/Trim72/Prnp/Cacna2d1/Adcy5/Ryr2/Nsg2	30
GO:0045620	negative regulation of lymphocyte differentiation	7/479	32/11002	0.000369893	0.000369893	0.00401002	Id2/Runx1/Il4ra/Irf1/Jak3/Zc3h12a/Nfkbid	7
GO:1904892	regulation of receptor signaling pathway via STAT	11/479	75/11002	0.000372644	0.000372644	0.00402601	Socs3/Bcl3/Osm/Notch1/Tnf/Irf1/Socs2/Jak1/Il6/Lck/Ptprd	11
GO:0035914	skeletal muscle cell differentiation	8/479	42/11002	0.000388633	0.000388633	0.00418442	Fos/Egr1/Notch1/Nr4a1/Myc/Egr2/Maff/S100b	8
GO:0050714	positive regulation of protein secretion	20/479	198/11002	0.000394268	0.000394268	0.00423065	Arid5a/Il1b/Il4ra/Osm/Abl2/Tnf/Casp4/Slamf1/Il17ra/Irs2/Xbp1/Il1a/Tcf7l2/Trpv4/Ccr7/Adora2a/Il6/Myom1/Mapk11/Clec4n	20
GO:0002250	adaptive immune response	25/479	275/11002	0.000400198	0.000400198	0.00427973	Arid5a/Il1b/Bcl3/Gadd45g/Il4ra/Pvr/Icam1/Myd88/Stat3/Tnf/Nfkbiz/Irf1/Slamf1/Fas/Jak3/Zc3h12a/Fcgr3/Traf6/Nfkbid/Ccr7/Tfrc/H60b/Il6/Nedd4/Clec4n	25
GO:0060627	regulation of vesicle-mediated transport	33/479	406/11002	0.000404635	0.000404635	0.00428718	Il1b/Il4ra/Sphk1/Notch1/Rab20/Tnf/Ston1/Slamf1/Ptpn1/Insig1/Cd300lf/Hip1/Bcl2l1/Rabgef1/Flot1/Serpine1/Siglece/Fcgr3/Gripap1/Grm4/Ccr7/Snx12/Syne1/Adora2a/Cnn2/Syt2/Trim9/Syp/Rims2/Lgi3/Nedd4/Syt1/Grik5	33
GO:0097190	apoptotic signaling pathway	36/479	457/11002	0.000405066	0.000405066	0.00428718	Ptgs2/Ier3/Il1b/Bcl3/Plaur/Jun/Osm/Icam1/Ticam1/Mcl1/Siah2/Atf4/Tnf/Casp4/Fas/Cebpb/Skil/Ptpn1/Myc/Hip1/Jak3/Rela/Xbp1/Bcl2l1/Il1a/Ripk1/Cx3cl1/Serpine1/Itprip/Cdkn2d/Tmbim1/Eef1e1/Tnfrsf12a/Adora2a/Lck/Mapk8ip2	36
GO:0032649	regulation of interferon-gamma production	10/479	64/11002	0.00040664	0.00040664	0.00428718	Arid5a/Il1b/Bcl3/Runx1/Abl2/Tnf/Slamf1/Zc3h12a/Ccr7/Prnp	10
GO:0043525	positive regulation of neuron apoptotic process	10/479	64/11002	0.00040664	0.00040664	0.00428718	Il1b/Egr1/Jun/Mcl1/Atf4/Tnf/Fas/Grik2/Prnp/Grik5	10
GO:1903409	reactive oxygen species biosynthetic process	12/479	88/11002	0.00040769	0.00040769	0.00428718	Ptgs2/Il1b/Icam1/Ticam1/Stat3/Tnf/Klf4/Zc3h12a/Hsp90aa1/Ncf1/Grin1/Il6	12
GO:0050673	epithelial cell proliferation	23/479	245/11002	0.000430507	0.000430507	0.00451208	Id2/Zfp36/C5ar1/Tgm1/Jun/Notch1/Stat3/B4galt1/F3/Tnf/Nr4a1/Cebpb/Myc/Xbp1/Tcf7l2/Lrg1/Ccnd2/Prkx/Errfi1/Id1/Vash1/Il6/Dll4	23
GO:0006836	neurotransmitter transport	18/479	170/11002	0.000432018	0.000432018	0.00451292	Sphk1/Tnf/Xbp1/Bcl2l1/Slc1a3/Flot1/Fcgr3/Grm4/Adora2a/Syt2/Trim9/Syp/Rims2/Sptbn2/Syt1/Slc6a17/Grik5/Erc1	18
GO:0002819	regulation of adaptive immune response	16/479	142/11002	0.000445989	0.000445989	0.00459689	Arid5a/Il1b/Il4ra/Pvr/Tnf/Nfkbiz/Irf1/Slamf1/Jak3/Zc3h12a/Fcgr3/Traf6/Nfkbid/Ccr7/Tfrc/Il6	16
GO:0045637	regulation of myeloid cell differentiation	16/479	142/11002	0.000445989	0.000445989	0.00459689	Id2/Zfp36/Fos/Runx1/Jun/Nfkbia/Klf10/Stat3/Tnf/Fas/Cebpb/Myc/Trib1/Ripk1/Traf6/Ocstamp	16
GO:0043371	negative regulation of CD4-positive, alpha-beta T cell differentiation	5/479	16/11002	0.000448799	0.000448799	0.00459689	Runx1/Il4ra/Irf1/Jak3/Zc3h12a	5
GO:0045063	T-helper 1 cell differentiation	5/479	16/11002	0.000448799	0.000448799	0.00459689	Gadd45g/Il4ra/Irf1/Jak3/Ccr7	5
GO:0071276	cellular response to cadmium ion	5/479	16/11002	0.000448799	0.000448799	0.00459689	Fos/Mt1/Mt2/Jun/Ncf1	5
GO:1904994	regulation of leukocyte adhesion to vascular endothelial cell	5/479	16/11002	0.000448799	0.000448799	0.00459689	Icam1/Tnf/Klf4/Rela/Traf6	5
GO:0061614	pri-miRNA transcription by RNA polymerase II	7/479	33/11002	0.000452107	0.000452107	0.0046009	Fos/Jun/Stat3/Klf4/Srf/Rela/Gnl3	7
GO:0071622	regulation of granulocyte chemotaxis	7/479	33/11002	0.000452107	0.000452107	0.0046009	C5ar1/Il1b/Slamf1/Tirap/Cx3cl1/Trpv4/Ccr7	7
GO:0032663	regulation of interleukin-2 production	8/479	43/11002	0.000459573	0.000459573	0.00466184	Zfp36/Il1b/Cd83/Runx1/Abl2/Il1a/Traf6/Prnp	8
GO:0014074	response to purine-containing compound	10/479	65/11002	0.00046225	0.00046225	0.00467396	Junb/Il1b/Jun/Mat2a/Jund/Crem/Per1/P2ry6/Adora2a/Ryr2	10
GO:0046634	regulation of alpha-beta T cell activation	11/479	77/11002	0.000470057	0.000470057	0.00473771	Cd83/Runx1/Il4ra/Nfkbiz/Irf1/Jak3/Zc3h12a/Nfkbid/Ccr7/Adora2a/Il6	11
GO:0050866	negative regulation of cell activation	15/479	129/11002	0.00047681	0.00047681	0.00479048	Id2/Runx1/Il4ra/Irf1/Fas/Cebpb/Cd300lf/Jak3/Rabgef1/Zc3h12a/Cx3cl1/Nfkbid/Adora2a/Prnp/Tyro3	15
GO:0002824	positive regulation of adaptive immune response based on somatic recombination of immune receptors built from immunoglobulin superfamily domains	12/479	90/11002	0.000502586	0.000502586	0.00503342	Arid5a/Il1b/Pvr/Tnf/Nfkbiz/Irf1/Fcgr3/Traf6/Nfkbid/Ccr7/Tfrc/Il6	12
GO:0040013	negative regulation of locomotion	19/479	187/11002	0.000508492	0.000508492	0.00507645	Dusp1/Sema6b/Notch1/Stat3/Klf4/Fas/Rbpj/Srf/Trib1/Gtpbp4/Sema4c/Rabgef1/Cx3cl1/Serpine1/Vash1/Adora2a/Cnn2/Sema7a/Dll4	19
GO:0031663	lipopolysaccharide-mediated signaling pathway	8/479	44/11002	0.000540665	0.000540665	0.0053637	Il1b/Nfkbia/Myd88/Ticam1/Tnf/Trib1/Cx3cl1/Traf6	8
GO:0032677	regulation of interleukin-8 production	8/479	44/11002	0.000540665	0.000540665	0.0053637	Il1b/Bcl3/Myd88/Tnf/Klf4/Tirap/Ripk1/Serpine1	8
GO:0002366	leukocyte activation involved in immune response	19/479	188/11002	0.000543396	0.000543396	0.00537389	Bcl3/Gadd45g/Sbno2/Il4ra/Icam1/Lfng/Ticam1/Stat3/Nfkbiz/Irf1/Slamf1/Jak3/Xbp1/Rabgef1/Zc3h12a/Nfkbid/Ccr7/Tfrc/Il6	19
GO:0051092	positive regulation of NF-kappaB transcription factor activity	13/479	104/11002	0.000560632	0.000560632	0.00552702	Il1b/Sphk1/Icam1/Myd88/Ticam1/Stat3/Tnf/Tirap/Rela/Ripk1/Cx3cl1/Flot1/Traf6	13
GO:0046686	response to cadmium ion	6/479	25/11002	0.000576091	0.000576091	0.00566173	Fos/Mt1/Mt2/Jun/Ncf1/Prnp	6
GO:0043523	regulation of neuron apoptotic process	19/479	189/11002	0.000580354	0.000580354	0.00568591	C5ar1/Il1b/Egr1/Mt1/Jun/Mcl1/Atf4/Tnf/Fas/Cebpb/Bcl2l1/Cx3cl1/Grin1/Adora2a/Grik2/Prnp/Nrbp2/Tyro3/Grik5	19
GO:1903426	regulation of reactive oxygen species biosynthetic process	11/479	79/11002	0.000587922	0.000587922	0.00574223	Ptgs2/Il1b/Icam1/Ticam1/Stat3/Tnf/Klf4/Zc3h12a/Hsp90aa1/Grin1/Il6	11
GO:0042090	interleukin-12 biosynthetic process	4/479	10/11002	0.00060418	0.00060418	0.00584671	Irf1/Rela/Traf6/Rel	4
GO:0045075	regulation of interleukin-12 biosynthetic process	4/479	10/11002	0.00060418	0.00060418	0.00584671	Irf1/Rela/Traf6/Rel	4
GO:0050832	defense response to fungus	4/479	10/11002	0.00060418	0.00060418	0.00584671	Il17ra/Ncf1/Cxcl1/Clec4n	4
GO:0051047	positive regulation of secretion	26/479	299/11002	0.000608995	0.000608995	0.00586216	Arid5a/Il1b/Runx1/Il4ra/Osm/Sphk1/Abl2/Tnf/Casp4/Slamf1/Ildr1/Il17ra/Irs2/Xbp1/Bcl2l1/Il1a/Tcf7l2/Trpv4/Ccr7/Adora2a/Syt2/Il6/Myom1/Mapk11/Syt1/Clec4n	26
GO:0002285	lymphocyte activation involved in immune response	15/479	132/11002	0.000609492	0.000609492	0.00586216	Bcl3/Gadd45g/Il4ra/Icam1/Lfng/Stat3/Nfkbiz/Irf1/Jak3/Xbp1/Zc3h12a/Nfkbid/Ccr7/Tfrc/Il6	15
GO:0046639	negative regulation of alpha-beta T cell differentiation	5/479	17/11002	0.00061322	0.00061322	0.00588008	Runx1/Il4ra/Irf1/Jak3/Zc3h12a	5
GO:0007260	tyrosine phosphorylation of STAT protein	8/479	45/11002	0.000632954	0.000632954	0.00605092	Socs3/Osm/Tnf/Irf1/Jak3/Jak1/Il6/Lck	8
GO:0050778	positive regulation of immune response	28/479	333/11002	0.000648795	0.000648795	0.00618362	Arid5a/C5ar1/Il1b/Il4ra/Cgas/Pvr/Ticam1/Tnf/Nfkbiz/Irf1/Polr3d/Tirap/Rela/Xbp1/Ddx21/Rabgef1/Zc3h12a/Sh2b2/Fcgr3/Traf6/Nfkbid/Ccr7/Tfrc/H60b/Il6/Sema7a/Prnp/Lck	28
GO:0051091	positive regulation of DNA-binding transcription factor activity	18/479	176/11002	0.000655416	0.000655416	0.00622791	Il1b/Sphk1/Icam1/Myd88/Ticam1/Stat3/Tnf/Tirap/Srf/Rela/Ripk1/Cx3cl1/Flot1/Pprc1/Traf6/Gtf2a2/Il6/Lrp8	18
GO:0002697	regulation of immune effector process	25/479	285/11002	0.000679236	0.000679236	0.00643487	Arid5a/Il1b/Il4ra/Cgas/Pvr/Ticam1/Tnf/Nfkbiz/Irf1/Slamf1/Jak3/Xbp1/Ddx21/Rabgef1/Zc3h12a/Fcgr3/Traf6/Cxcl1/Nlrx1/Nfkbid/Ccr7/Tfrc/H60b/Il6/Sema7a	25
GO:0032868	response to insulin	17/479	162/11002	0.000685384	0.000685384	0.00647367	Socs3/Il1b/Egr1/Socs2/Ptpn1/Irs2/Rela/Xbp1/Cish/Egr2/Myo1c/Sh2b2/Cpeb2/Ndel1/Trpv4/Srsf5/Trim72	17
GO:0002263	cell activation involved in immune response	19/479	192/11002	0.000704556	0.000704556	0.00663489	Bcl3/Gadd45g/Sbno2/Il4ra/Icam1/Lfng/Ticam1/Stat3/Nfkbiz/Irf1/Slamf1/Jak3/Xbp1/Rabgef1/Zc3h12a/Nfkbid/Ccr7/Tfrc/Il6	19
GO:0031338	regulation of vesicle fusion	6/479	26/11002	0.000721711	0.000721711	0.00672676	Sphk1/Slamf1/Syt2/Trim9/Syt1/Grik5	6
GO:0032620	interleukin-17 production	6/479	26/11002	0.000721711	0.000721711	0.00672676	Arid5a/Osm/Sphk1/Myd88/Il6/Prnp	6
GO:0032743	positive regulation of interleukin-2 production	6/479	26/11002	0.000721711	0.000721711	0.00672676	Il1b/Cd83/Runx1/Abl2/Il1a/Traf6	6
GO:0006809	nitric oxide biosynthetic process	9/479	57/11002	0.000727105	0.000727105	0.00672676	Ptgs2/Il1b/Icam1/Ticam1/Tnf/Klf4/Zc3h12a/Hsp90aa1/Il6	9
GO:0038034	signal transduction in absence of ligand	9/479	57/11002	0.000727105	0.000727105	0.00672676	Il1b/Mcl1/Tnf/Fas/Jak3/Bcl2l1/Il1a/Ripk1/Cx3cl1	9
GO:0097192	extrinsic apoptotic signaling pathway in absence of ligand	9/479	57/11002	0.000727105	0.000727105	0.00672676	Il1b/Mcl1/Tnf/Fas/Jak3/Bcl2l1/Il1a/Ripk1/Cx3cl1	9
GO:0030595	leukocyte chemotaxis	15/479	135/11002	0.000772425	0.000772425	0.00712514	Dusp1/C5ar1/Il1b/Slamf1/Il17ra/Tirap/Cx3cl1/Serpine1/Fcgr3/Trem1/Cxcl2/Cxcl1/Trpv4/Ccr7/Cxcr5	15
GO:0048167	regulation of synaptic plasticity	16/479	150/11002	0.000817899	0.000817899	0.00751042	Ptgs2/Egr1/Srf/Bcl2l1/Grin2c/Grin1/Shank1/Adora2a/Grik2/Atp2b2/Syp/Rims2/Kalrn/Map1a/Prnp/S100b	16
GO:0010759	positive regulation of macrophage chemotaxis	5/479	18/11002	0.000818954	0.000818954	0.00751042	C5ar1/Slamf1/Cx3cl1/Trpv4/Ccr7	5
GO:0050728	negative regulation of inflammatory response	12/479	95/11002	0.000824053	0.000824053	0.00753528	Socs3/Zfp36/Ier3/Rabgef1/Zc3h12a/Cx3cl1/Siglece/Nlrx1/Adora2a/Ctla2a/Metrnl/Tyro3	12
GO:0030593	neutrophil chemotaxis	9/479	58/11002	0.000828157	0.000828157	0.00755091	C5ar1/Il1b/Tirap/Cx3cl1/Fcgr3/Trem1/Cxcl2/Cxcl1/Ccr7	9
GO:0048608	reproductive structure development	22/479	241/11002	0.00083109	0.00083109	0.00755582	Socs3/Ptgs2/Junb/Runx1/Plaur/Icam1/Notch1/Lfng/Cebpb/Rbpj/Adamts1/Bcl2l1/Il1a/Tcf7l2/Tiparp/Serpine1/H3f3b/Vash1/Insl3/Jmjd1c/Adm/Tyro3	22
GO:0050678	regulation of epithelial cell proliferation	20/479	210/11002	0.000837046	0.000837046	0.0075881	Zfp36/C5ar1/Tgm1/Jun/Notch1/Stat3/B4galt1/F3/Tnf/Nr4a1/Myc/Xbp1/Tcf7l2/Lrg1/Ccnd2/Errfi1/Id1/Vash1/Il6/Dll4	20
GO:0032637	interleukin-8 production	8/479	47/11002	0.000855607	0.000855607	0.00773414	Il1b/Bcl3/Myd88/Tnf/Klf4/Tirap/Ripk1/Serpine1	8
GO:0061756	leukocyte adhesion to vascular endothelial cell	6/479	27/11002	0.000894233	0.000894233	0.0080602	Icam1/Tnf/Klf4/Rela/Traf6/Itgb7	6
GO:0050905	neuromuscular process	11/479	83/11002	0.000898224	0.000898224	0.00806971	Abl2/Comp/Slc1a3/Gch1/Grin2c/Grin1/Shank1/Adora2a/Atp2b2/Adcy5/Cntnap1	11
GO:0002821	positive regulation of adaptive immune response	12/479	96/11002	0.00090552	0.00090552	0.00806971	Arid5a/Il1b/Pvr/Tnf/Nfkbiz/Irf1/Fcgr3/Traf6/Nfkbid/Ccr7/Tfrc/Il6	12
GO:0046165	alcohol biosynthetic process	12/479	96/11002	0.00090552	0.00090552	0.00806971	Il1b/Sphk1/Tnf/Insig1/Hmgcr/Sptlc2/Gch1/P2ry6/Pmvk/Apob/Cyp51/Plch2	12
GO:1903707	negative regulation of hemopoiesis	12/479	96/11002	0.00090552	0.00090552	0.00806971	Id2/Zfp36/Runx1/Il4ra/Nfkbia/Notch1/Irf1/Myc/Jak3/Trib1/Zc3h12a/Nfkbid	12
GO:0001660	fever generation	4/479	11/11002	0.000916906	0.000916906	0.00810251	Ptgs2/Il1b/Tnf/Il1a	4
GO:0060080	inhibitory postsynaptic potential	4/479	11/11002	0.000916906	0.000916906	0.00810251	Cx3cl1/Adora2a/Grik2/Rims2	4
GO:1900221	regulation of amyloid-beta clearance	4/479	11/11002	0.000916906	0.000916906	0.00810251	Tnf/Srf/Hmgcr/Cyp51	4
GO:0070838	divalent metal ion transport	24/479	275/11002	0.000928418	0.000928418	0.00818133	Ptgs2/Rrad/Marcksl1/Gem/Icam1/Slc41a1/Jak3/Homer1/Cx3cl1/Serpine1/Grin2c/P2ry6/Grin1/Slc25a25/Hspa2/Trpv4/Adora2a/Atp2b2/Plch2/Prnp/Cacna2d1/Pkd1l3/Ryr2/Lck	24
GO:0045682	regulation of epidermis development	7/479	37/11002	0.000937264	0.000937264	0.00818625	Zfp36/Nab2/Notch1/Tnf/Errfi1/Maff/Klf7	7
GO:0071675	regulation of mononuclear cell migration	7/479	37/11002	0.000937264	0.000937264	0.00818625	Dusp1/C5ar1/Slamf1/Cx3cl1/Serpine1/Trpv4/Ccr7	7
GO:0072604	interleukin-6 secretion	7/479	37/11002	0.000937264	0.000937264	0.00818625	Arid5a/Il1b/Tnf/Xbp1/Rabgef1/Zc3h12a/Trpv4	7
GO:0002440	production of molecular mediator of immune response	16/479	152/11002	0.000944154	0.000944154	0.00818625	Arid5a/Il1b/Il4ra/Cgas/Ticam1/Tnf/Slamf1/Fas/Jak3/Xbp1/Ddx21/Trem1/Traf6/Tfrc/Il6/Sema7a	16
GO:0046425	regulation of receptor signaling pathway via JAK-STAT	10/479	71/11002	0.000944546	0.000944546	0.00818625	Socs3/Bcl3/Osm/Notch1/Tnf/Irf1/Socs2/Il6/Lck/Ptprd	10
GO:0051928	positive regulation of calcium ion transport	10/479	71/11002	0.000944546	0.000944546	0.00818625	Jak3/Homer1/Cx3cl1/Serpine1/P2ry6/Grin1/Hspa2/Atp2b2/Cacna2d1/Ryr2	10
GO:0072511	divalent inorganic cation transport	24/479	276/11002	0.000976591	0.000976591	0.00843865	Ptgs2/Rrad/Marcksl1/Gem/Icam1/Slc41a1/Jak3/Homer1/Cx3cl1/Serpine1/Grin2c/P2ry6/Grin1/Slc25a25/Hspa2/Trpv4/Adora2a/Atp2b2/Plch2/Prnp/Cacna2d1/Pkd1l3/Ryr2/Lck	24
GO:0061458	reproductive system development	22/479	244/11002	0.000979019	0.000979019	0.00843865	Socs3/Ptgs2/Junb/Runx1/Plaur/Icam1/Notch1/Lfng/Cebpb/Rbpj/Adamts1/Bcl2l1/Il1a/Tcf7l2/Tiparp/Serpine1/H3f3b/Vash1/Insl3/Jmjd1c/Adm/Tyro3	22
GO:0032623	interleukin-2 production	8/479	48/11002	0.000988364	0.000988364	0.00847291	Zfp36/Il1b/Cd83/Runx1/Abl2/Il1a/Traf6/Prnp	8
GO:0150076	neuroinflammatory response	8/479	48/11002	0.000988364	0.000988364	0.00847291	Ptgs2/C5ar1/Il1b/Jun/Sphk1/Tnf/Cx3cl1/Adora2a	8
GO:0030534	adult behavior	12/479	97/11002	0.000993589	0.000993589	0.00849461	Id2/Abl2/Homer1/Sez6/Ccnd2/Grin1/Shank1/Kalrn/Sptbn2/Lgi4/Sez6l2/Sptbn4	12
GO:0048812	neuron projection morphogenesis	33/479	428/11002	0.00101316	0.00101316	0.00863848	Sema6b/Notch1/Abl2/Skil/Srf/Sema4c/Egr2/Hsp90aa1/Flot1/Ndel1/Zswim4/Grin1/Tnfrsf12a/Id1/Nptx1/Syne1/Shank1/Trim46/Klf7/Adora2a/Syt2/Rims2/Sema7a/Kalrn/Map1a/Nedd4/Ablim1/Syt1/Cntnap1/Sptbn4/Lrp8/Mapk8ip2/Ptprd	33
GO:0048667	cell morphogenesis involved in neuron differentiation	31/479	394/11002	0.00103189	0.00103189	0.00877453	Sema6b/Id2/Notch1/Abl2/Skil/Srf/Sema4c/Slc1a3/Egr2/Hsp90aa1/Flot1/Ndel1/Zswim4/Grin1/Tnfrsf12a/Id1/Nptx1/Syne1/Shank1/Trim46/Klf7/Atp2b2/Sema7a/Kalrn/Map1a/Nedd4/Ablim1/Sptbn4/Lrp8/Mapk8ip2/Ptprd	31
GO:0002702	positive regulation of production of molecular mediator of immune response	10/479	72/11002	0.00105518	0.00105518	0.00894846	Arid5a/Il1b/Il4ra/Ticam1/Xbp1/Ddx21/Traf6/Tfrc/Il6/Sema7a	10
GO:0032680	regulation of tumor necrosis factor production	14/479	125/11002	0.00105884	0.00105884	0.00895537	Arid5a/Zfp36/Bcl3/Myd88/Ticam1/Slamf1/Tirap/Ripk1/Zc3h12a/Cx3cl1/Fcgr3/Errfi1/Cd300ld/Ccr7	14
GO:0046209	nitric oxide metabolic process	9/479	60/11002	0.00106455	0.00106455	0.00897095	Ptgs2/Il1b/Icam1/Ticam1/Tnf/Klf4/Zc3h12a/Hsp90aa1/Il6	9
GO:0009620	response to fungus	5/479	19/11002	0.00107205	0.00107205	0.00897095	Myd88/Il17ra/Ncf1/Cxcl1/Clec4n	5
GO:0042036	negative regulation of cytokine biosynthetic process	5/479	19/11002	0.00107205	0.00107205	0.00897095	Zfp36/Bcl3/Klf4/Errfi1/Il6	5
GO:1901522	positive regulation of transcription from RNA polymerase II promoter involved in cellular response to chemical stimulus	5/479	19/11002	0.00107205	0.00107205	0.00897095	Notch1/Atf4/Rbpj/Rela/Xbp1	5
GO:0051250	negative regulation of lymphocyte activation	12/479	98/11002	0.00108867	0.00108867	0.00908589	Id2/Runx1/Il4ra/Irf1/Fas/Cebpb/Jak3/Zc3h12a/Nfkbid/Adora2a/Prnp/Tyro3	12
GO:1902622	regulation of neutrophil migration	6/479	28/11002	0.00109684	0.00109684	0.0091059	C5ar1/Il1b/Myd88/Tirap/Il1a/Ccr7	6
GO:1902893	regulation of pri-miRNA transcription by RNA polymerase II	6/479	28/11002	0.00109684	0.00109684	0.0091059	Fos/Jun/Stat3/Srf/Rela/Gnl3	6
GO:0050710	negative regulation of cytokine secretion	7/479	38/11002	0.00110653	0.00110653	0.00916227	Srgn/Tnf/Slamf1/Rabgef1/Zc3h12a/Cx3cl1/Il6	7
GO:0007186	G protein-coupled receptor signaling pathway	25/479	295/11002	0.00111503	0.00111503	0.00920844	C5ar1/Gpr84/Tgm2/Atf4/Gpr132/Homer1/Cish/Gpr31b/Cx3cl1/Gpr65/Gna13/Aplp1/P2ry6/Grm4/Ccr7/Insl3/Rgs1/Adora2a/Syp/Cxcr5/Adcy5/Gpr158/Adm/Lpar2/Tyro3	25
GO:1901653	cellular response to peptide	20/479	215/11002	0.00112109	0.00112109	0.00923432	Socs3/Il1b/Icam1/Stat3/Nr4a1/Casp4/Irf1/Socs2/Ptpn1/Irs2/Rela/Xbp1/Cish/Myo1c/Sh2b2/Cpeb2/Ndel1/Trim72/Prnp/Cacna2d1	20
GO:0002705	positive regulation of leukocyte mediated immunity	13/479	112/11002	0.0011357	0.0011357	0.00931758	Arid5a/Il1b/Il4ra/Pvr/Ticam1/Tnf/Ddx21/Fcgr3/Traf6/Cxcl1/Tfrc/H60b/Il6	13
GO:0046635	positive regulation of alpha-beta T cell activation	8/479	49/11002	0.00113711	0.00113711	0.00931758	Cd83/Runx1/Il4ra/Nfkbiz/Irf1/Nfkbid/Ccr7/Il6	8
GO:2000377	regulation of reactive oxygen species metabolic process	16/479	155/11002	0.00116437	0.00116437	0.00951626	Ptgs2/Ier3/Il1b/Icam1/Ticam1/Stat3/Tnf/Klf4/Ripk1/Zc3h12a/Gadd45a/Hsp90aa1/Gch1/Grin1/Cxcl1/Il6	16
GO:0070665	positive regulation of leukocyte proliferation	12/479	99/11002	0.00119118	0.00119118	0.00971027	Il1b/Myd88/Ticam1/Slamf1/Irs2/Tirap/Jak3/Traf6/Ccr7/Tfrc/Il6/Ocstamp	12
GO:0032102	negative regulation of response to external stimulus	21/479	232/11002	0.00120549	0.00120549	0.00980159	Socs3/Dusp1/Sema6b/Zfp36/Ier3/Notch1/Hmgcr/Trib1/Sema4c/Rabgef1/Zc3h12a/Cx3cl1/Serpine1/Siglece/Grin1/Nlrx1/Adora2a/Sema7a/Ctla2a/Metrnl/Tyro3	21
GO:1903555	regulation of tumor necrosis factor superfamily cytokine production	14/479	127/11002	0.00123694	0.00123694	0.0100314	Arid5a/Zfp36/Bcl3/Myd88/Ticam1/Slamf1/Tirap/Ripk1/Zc3h12a/Cx3cl1/Fcgr3/Errfi1/Cd300ld/Ccr7	14
GO:0051924	regulation of calcium ion transport	16/479	156/11002	0.00124681	0.00124681	0.0100855	Ptgs2/Rrad/Gem/Icam1/Jak3/Homer1/Cx3cl1/Serpine1/P2ry6/Grin1/Hspa2/Adora2a/Atp2b2/Prnp/Cacna2d1/Ryr2	16
GO:0043270	positive regulation of ion transport	17/479	171/11002	0.00125771	0.00125771	0.0101218	Il1b/Atf4/Cebpb/Jak3/Il1a/Homer1/Cx3cl1/Serpine1/P2ry6/Grin1/Cxcl1/Hspa2/Adora2a/Atp2b2/Wnk2/Cacna2d1/Ryr2	17
GO:0097191	extrinsic apoptotic signaling pathway	17/479	171/11002	0.00125771	0.00125771	0.0101218	Il1b/Icam1/Mcl1/Siah2/Tnf/Fas/Skil/Jak3/Rela/Bcl2l1/Il1a/Ripk1/Cx3cl1/Serpine1/Itprip/Tmbim1/Tnfrsf12a	17
GO:0002720	positive regulation of cytokine production involved in immune response	7/479	39/11002	0.00129889	0.00129889	0.0104001	Arid5a/Il1b/Ticam1/Ddx21/Traf6/Il6/Sema7a	7
GO:0045600	positive regulation of fat cell differentiation	7/479	39/11002	0.00129889	0.00129889	0.0104001	Id2/Ptgs2/Zfp36/Cebpb/Xbp1/Zc3h12a/Metrnl	7
GO:0045064	T-helper 2 cell differentiation	4/479	12/11002	0.00132832	0.00132832	0.0104765	Bcl3/Il4ra/Irf1/Il6	4
GO:0060055	angiogenesis involved in wound healing	4/479	12/11002	0.00132832	0.00132832	0.0104765	B4galt1/Xbp1/Cx3cl1/Serpine1	4
GO:0061179	negative regulation of insulin secretion involved in cellular response to glucose stimulus	4/479	12/11002	0.00132832	0.00132832	0.0104765	Hmgcr/Pim3/Ucp2/Klf7	4
GO:0061418	regulation of transcription from RNA polymerase II promoter in response to hypoxia	4/479	12/11002	0.00132832	0.00132832	0.0104765	Egr1/Bach1/Notch1/Rbpj	4
GO:0002696	positive regulation of leukocyte activation	20/479	218/11002	0.00132835	0.00132835	0.0104765	Il1b/Cd83/Runx1/Il4ra/Myd88/Ticam1/Nfkbiz/Irf1/Slamf1/Irs2/Tirap/Jak3/Xbp1/Hsp90aa1/Traf6/Nfkbid/Ccr7/Tfrc/Il6/Lck	20
GO:0071901	negative regulation of protein serine/threonine kinase activity	11/479	87/11002	0.00133323	0.00133323	0.0104765	Dusp1/Il1b/Dusp8/Dusp5/Ptpn1/Dusp16/Hmgcr/Dusp2/Paqr3/Pkia/Spry4	11
GO:1901214	regulation of neuron death	23/479	266/11002	0.0013336	0.0013336	0.0104765	C5ar1/Il1b/Fos/Egr1/Mt1/Jun/Stat3/Mcl1/Atf4/Tnf/Fas/Cebpb/Bcl2l1/Cx3cl1/Grin1/Adora2a/Grik2/Rel/Il6/Prnp/Nrbp2/Tyro3/Grik5	23
GO:0032640	tumor necrosis factor production	14/479	128/11002	0.00133499	0.00133499	0.0104765	Arid5a/Zfp36/Bcl3/Myd88/Ticam1/Slamf1/Tirap/Ripk1/Zc3h12a/Cx3cl1/Fcgr3/Errfi1/Cd300ld/Ccr7	14
GO:2001057	reactive nitrogen species metabolic process	9/479	62/11002	0.0013528	0.0013528	0.0105899	Ptgs2/Il1b/Icam1/Ticam1/Tnf/Klf4/Zc3h12a/Hsp90aa1/Il6	9
GO:0072539	T-helper 17 cell differentiation	5/479	20/11002	0.00137881	0.00137881	0.0107668	Stat3/Nfkbiz/Zc3h12a/Nfkbid/Il6	5
GO:0034220	ion transmembrane transport	35/479	472/11002	0.00142292	0.00142292	0.0110838	Rrad/Marcksl1/Gem/Slc41a1/Tnf/Slc12a7/Myc/Irs2/Steap4/Homer1/Slc7a6/Ripk1/Slc1a3/Kcnq2/Cx3cl1/Grin2c/P2ry6/Grin1/Slc25a25/Gabrd/Kcnab3/Hspa2/Trpv4/Slc20a1/Shank1/Atp2b2/Scn2b/Plch2/Prnp/Wnk2/Nedd4/Cacna2d1/Ryr2/Lck/Mapk8ip2	35
GO:0070588	calcium ion transmembrane transport	16/479	158/11002	0.00142655	0.00142655	0.0110847	Rrad/Marcksl1/Gem/Cx3cl1/Grin2c/P2ry6/Grin1/Slc25a25/Hspa2/Trpv4/Atp2b2/Plch2/Prnp/Cacna2d1/Ryr2/Lck	16
GO:0050776	regulation of immune response	34/479	455/11002	0.00145785	0.00145785	0.0113001	Arid5a/C5ar1/Il1b/Il4ra/Cgas/Pvr/Ticam1/Tnf/Nfkbiz/Irf1/Slamf1/Polr3d/Tirap/Jak3/Rela/Xbp1/Ddx21/Rabgef1/Zc3h12a/Sh2b2/Fcgr3/Traf6/Nlrx1/Nfkbid/Ccr7/Tfrc/H60b/Il6/Sema7a/Prnp/Lck/Lrp8/Ptprd/Tyro3	34
GO:0043434	response to peptide hormone	20/479	220/11002	0.001484	0.001484	0.011459	Socs3/Il1b/Egr1/Stat3/Nr4a1/Irf1/Socs2/Ptpn1/Irs2/Rela/Xbp1/Cish/Egr2/Myo1c/Sh2b2/Cpeb2/Ndel1/Trpv4/Srsf5/Trim72	20
GO:0032608	interferon-beta production	8/479	51/11002	0.00148797	0.00148797	0.011459	Ticam1/Irf1/Polr3d/Tirap/Flot1/Nlrx1/Trim56/Rel	8
GO:0002443	leukocyte mediated immunity	22/479	252/11002	0.00148925	0.00148925	0.011459	Arid5a/Il1b/Bcl3/Il4ra/Pvr/Icam1/Myd88/Ticam1/Tnf/Slamf1/Fas/Jak3/Ddx21/Rabgef1/Ncf1/Fcgr3/Trem1/Traf6/Cxcl1/Tfrc/H60b/Il6	22
GO:0046879	hormone secretion	18/479	189/11002	0.00149771	0.00149771	0.0114682	Il1b/Runx1/Osm/Midn/Tnf/Ildr1/Irs2/Hmgcr/Tcf7l2/Pim3/Ucp2/Trpv4/Klf7/Il6/Rims2/Kalrn/Adcy5/Adm	18
GO:0051271	negative regulation of cellular component movement	18/479	189/11002	0.00149771	0.00149771	0.0114682	Dusp1/Sema6b/Notch1/Stat3/Klf4/Fas/Rbpj/Srf/Trib1/Gtpbp4/Sema4c/Rabgef1/Cx3cl1/Serpine1/Vash1/Cnn2/Sema7a/Dll4	18
GO:0061900	glial cell activation	7/479	40/11002	0.00151643	0.00151643	0.0115457	C5ar1/Il1b/Jun/Sphk1/Tnf/Cx3cl1/Adora2a	7
GO:0014015	positive regulation of gliogenesis	9/479	63/11002	0.00151881	0.00151881	0.0115457	Id2/Il1b/Notch1/Tnf/Myc/Rela/Grin1/Il6/Rnf112	9
GO:1902106	negative regulation of leukocyte differentiation	9/479	63/11002	0.00151881	0.00151881	0.0115457	Id2/Runx1/Il4ra/Irf1/Myc/Jak3/Trib1/Zc3h12a/Nfkbid	9
GO:0120039	plasma membrane bounded cell projection morphogenesis	33/479	439/11002	0.00154682	0.00154682	0.0117033	Sema6b/Notch1/Abl2/Skil/Srf/Sema4c/Egr2/Hsp90aa1/Flot1/Ndel1/Zswim4/Grin1/Tnfrsf12a/Id1/Nptx1/Syne1/Shank1/Trim46/Klf7/Adora2a/Syt2/Rims2/Sema7a/Kalrn/Map1a/Nedd4/Ablim1/Syt1/Cntnap1/Sptbn4/Lrp8/Mapk8ip2/Ptprd	33
GO:0050920	regulation of chemotaxis	14/479	130/11002	0.00155068	0.00155068	0.0117033	Dusp1/Sema6b/C5ar1/Il1b/Notch1/Slamf1/Tirap/Sema4c/Cx3cl1/Serpine1/Zswim4/Trpv4/Ccr7/Sema7a	14
GO:0071706	tumor necrosis factor superfamily cytokine production	14/479	130/11002	0.00155068	0.00155068	0.0117033	Arid5a/Zfp36/Bcl3/Myd88/Ticam1/Slamf1/Tirap/Ripk1/Zc3h12a/Cx3cl1/Fcgr3/Errfi1/Cd300ld/Ccr7	14
GO:0007269	neurotransmitter secretion	13/479	116/11002	0.0015712	0.0015712	0.0118017	Sphk1/Xbp1/Bcl2l1/Grm4/Adora2a/Syt2/Trim9/Syp/Rims2/Sptbn2/Syt1/Grik5/Erc1	13
GO:0099643	signal release from synapse	13/479	116/11002	0.0015712	0.0015712	0.0118017	Sphk1/Xbp1/Bcl2l1/Grm4/Adora2a/Syt2/Trim9/Syp/Rims2/Sptbn2/Syt1/Grik5/Erc1	13
GO:0045581	negative regulation of T cell differentiation	6/479	30/11002	0.00160576	0.00160576	0.0119097	Runx1/Il4ra/Irf1/Jak3/Zc3h12a/Nfkbid	6
GO:0046636	negative regulation of alpha-beta T cell activation	6/479	30/11002	0.00160576	0.00160576	0.0119097	Runx1/Il4ra/Irf1/Jak3/Zc3h12a/Adora2a	6
GO:0050873	brown fat cell differentiation	6/479	30/11002	0.00160576	0.00160576	0.0119097	Ptgs2/Cebpb/Lrg1/Sh2b2/Trpv4/Metrnl	6
GO:0060251	regulation of glial cell proliferation	6/479	30/11002	0.00160576	0.00160576	0.0119097	Il1b/Notch1/Tnf/Fas/Myc/Il6	6
GO:0061383	trabecula morphogenesis	6/479	30/11002	0.00160576	0.00160576	0.0119097	Sbno2/Notch1/Rbpj/Adamts1/Srf/Dll4	6
GO:0016079	synaptic vesicle exocytosis	11/479	89/11002	0.00160822	0.00160822	0.0119097	Bcl2l1/Grm4/Adora2a/Syt2/Trim9/Syp/Rims2/Sptbn2/Syt1/Grik5/Erc1	11
GO:0009914	hormone transport	18/479	191/11002	0.00168626	0.00168626	0.0124583	Il1b/Runx1/Osm/Midn/Tnf/Ildr1/Irs2/Hmgcr/Tcf7l2/Pim3/Ucp2/Trpv4/Klf7/Il6/Rims2/Kalrn/Adcy5/Adm	18
GO:0006979	response to oxidative stress	25/479	304/11002	0.00169628	0.00169628	0.0124968	Ptgs2/Kdm6b/Fos/Rcan1/Jun/Sphk1/Txnrd1/Mcl1/Atf4/Tnf/Ppp1r15b/Rela/Xbp1/Ripk1/Ucp2/Zc3h12a/Gch1/Cpeb2/Ncf1/Ccr7/Ggt7/Il6/Prnp/Rnf112/Lck	25
GO:0022408	negative regulation of cell-cell adhesion	13/479	117/11002	0.00169939	0.00169939	0.0124968	Runx1/Il4ra/Abl2/Klf4/Irf1/Cebpb/Jak3/Gtpbp4/Zc3h12a/Nfkbid/Trpv4/Adora2a/Prnp	13
GO:0046426	negative regulation of receptor signaling pathway via JAK-STAT	5/479	21/11002	0.00174571	0.00174571	0.0126895	Socs3/Bcl3/Irf1/Socs2/Ptprd	5
GO:0061384	heart trabecula morphogenesis	5/479	21/11002	0.00174571	0.00174571	0.0126895	Notch1/Rbpj/Adamts1/Srf/Dll4	5
GO:1901099	negative regulation of signal transduction in absence of ligand	5/479	21/11002	0.00174571	0.00174571	0.0126895	Il1b/Mcl1/Tnf/Ripk1/Cx3cl1	5
GO:1904893	negative regulation of receptor signaling pathway via STAT	5/479	21/11002	0.00174571	0.00174571	0.0126895	Socs3/Bcl3/Irf1/Socs2/Ptprd	5
GO:2001240	negative regulation of extrinsic apoptotic signaling pathway in absence of ligand	5/479	21/11002	0.00174571	0.00174571	0.0126895	Il1b/Mcl1/Tnf/Ripk1/Cx3cl1	5
GO:0019935	cyclic-nucleotide-mediated signaling	11/479	90/11002	0.00176217	0.00176217	0.0127797	Cgas/Gpr65/Gna13/Aplp1/Pde10a/Insl3/Rundc3a/Adora2a/Rims2/Adcy5/Adm	11
GO:0019933	cAMP-mediated signaling	10/479	77/11002	0.00177878	0.00177878	0.0128706	Cgas/Gpr65/Gna13/Aplp1/Pde10a/Insl3/Adora2a/Rims2/Adcy5/Adm	10
GO:0032412	regulation of ion transmembrane transporter activity	14/479	132/11002	0.00179467	0.00179467	0.0129558	Rrad/Gem/Homer1/Ripk1/P2ry6/Hspa2/Shank1/Scn2b/Prnp/Wnk2/Nedd4/Cacna2d1/Ryr2/Mapk8ip2	14
GO:0007050	cell cycle arrest	12/479	104/11002	0.00183124	0.00183124	0.0131897	Id2/Notch1/Irf1/Skil/Myc/Rassf1/Tcf7l2/Sde2/Gadd45a/Cdkn2d/Vash1/Rnf112	12
GO:0043281	regulation of cysteine-type endopeptidase activity involved in apoptotic process	15/479	147/11002	0.00184252	0.00184252	0.0132268	Ptgs2/Plaur/Siah2/F3/Tnf/Klf4/Nr4a1/Casp4/Fas/Myc/Hip1/Cdkn2d/Adora2a/Il6/Lck	15
GO:0045987	positive regulation of smooth muscle contraction	4/479	13/11002	0.00185316	0.00185316	0.0132268	Ptgs2/Sphk1/Srf/Lck	4
GO:0046688	response to copper ion	4/479	13/11002	0.00185316	0.00185316	0.0132268	Mt1/Mt2/Il1a/Prnp	4
GO:0072643	interferon-gamma secretion	4/479	13/11002	0.00185316	0.00185316	0.0132268	Arid5a/Abl2/Slamf1/Zc3h12a	4
GO:0048858	cell projection morphogenesis	33/479	444/11002	0.00186102	0.00186102	0.0132529	Sema6b/Notch1/Abl2/Skil/Srf/Sema4c/Egr2/Hsp90aa1/Flot1/Ndel1/Zswim4/Grin1/Tnfrsf12a/Id1/Nptx1/Syne1/Shank1/Trim46/Klf7/Adora2a/Syt2/Rims2/Sema7a/Kalrn/Map1a/Nedd4/Ablim1/Syt1/Cntnap1/Sptbn4/Lrp8/Mapk8ip2/Ptprd	33
GO:1904951	positive regulation of establishment of protein localization	26/479	323/11002	0.00187026	0.00187026	0.0132887	Arid5a/Ptgs2/Il1b/Il4ra/Osm/Abl2/Tnf/Casp4/Slamf1/Il17ra/Irs2/Xbp1/Il1a/Tcf7l2/Zc3h12a/Myo1c/Trpv4/Ccr7/Adora2a/Il6/Prnp/Coro2b/Myom1/Mapk11/Mtcl1/Clec4n	26
GO:0032990	cell part morphogenesis	34/479	462/11002	0.00188006	0.00188006	0.0133283	Sema6b/Notch1/Abl2/Skil/Srf/Bcl2l1/Sema4c/Egr2/Hsp90aa1/Flot1/Ndel1/Zswim4/Grin1/Tnfrsf12a/Id1/Nptx1/Syne1/Shank1/Trim46/Klf7/Adora2a/Syt2/Rims2/Sema7a/Kalrn/Map1a/Nedd4/Ablim1/Syt1/Cntnap1/Sptbn4/Lrp8/Mapk8ip2/Ptprd	34
GO:0014909	smooth muscle cell migration	9/479	65/11002	0.00189986	0.00189986	0.0134385	Egr1/F3/Rbpj/Myc/Adamts1/Trib1/Serpine1/P2ry6/Kalrn	9
GO:0046627	negative regulation of insulin receptor signaling pathway	6/479	31/11002	0.00191912	0.00191912	0.0135443	Socs3/Il1b/Socs2/Rela/Cish/Trim72	6
GO:0061448	connective tissue development	14/479	133/11002	0.00192814	0.00192814	0.0135776	Id2/Arid5a/Egr1/Notch1/Chsy1/Srf/Rela/Xbp1/Comp/Mex3c/Sptlc2/Slc25a25/Trpv4/Klf7	14
GO:0051222	positive regulation of protein transport	25/479	307/11002	0.00194059	0.00194059	0.0136349	Arid5a/Ptgs2/Il1b/Il4ra/Osm/Abl2/Tnf/Casp4/Slamf1/Il17ra/Irs2/Xbp1/Il1a/Tcf7l2/Zc3h12a/Myo1c/Trpv4/Ccr7/Adora2a/Il6/Prnp/Myom1/Mapk11/Mtcl1/Clec4n	25
GO:0060326	cell chemotaxis	17/479	178/11002	0.00194563	0.00194563	0.0136399	Dusp1/C5ar1/Il1b/Notch1/Nr4a1/Slamf1/Il17ra/Tirap/Cx3cl1/Serpine1/Fcgr3/Trem1/Cxcl2/Cxcl1/Trpv4/Ccr7/Cxcr5	17
GO:0030316	osteoclast differentiation	10/479	78/11002	0.00196298	0.00196298	0.013731	Junb/Fos/Sbno2/Klf10/Tnf/Cebpb/Cd300lf/Traf6/Tfrc/Ocstamp	10
GO:0007611	learning or memory	17/479	179/11002	0.00206582	0.00206582	0.0144138	Ptgs2/Il1b/Egr1/Rcan1/Jun/Abl2/Srf/Hmgcr/Ccnd2/Grin1/Grm4/Shank1/Kalrn/Map1a/Prnp/Mapk8ip2/S100b	17
GO:0007548	sex differentiation	14/479	134/11002	0.00206973	0.00206973	0.0144138	Runx1/Icam1/Lfng/Cebpb/Adamts1/Bcl2l1/Il1a/Tcf7l2/Tiparp/Serpine1/H3f3b/Insl3/Jmjd1c/Tyro3	14
GO:0046883	regulation of hormone secretion	15/479	149/11002	0.00210615	0.00210615	0.0145711	Il1b/Runx1/Osm/Midn/Tnf/Ildr1/Irs2/Hmgcr/Tcf7l2/Pim3/Ucp2/Klf7/Il6/Kalrn/Adcy5	15
GO:0007613	memory	11/479	92/11002	0.00210618	0.00210618	0.0145711	Ptgs2/Il1b/Egr1/Rcan1/Srf/Ccnd2/Grin1/Shank1/Kalrn/Map1a/S100b	11
GO:0050671	positive regulation of lymphocyte proliferation	11/479	92/11002	0.00210618	0.00210618	0.0145711	Il1b/Myd88/Ticam1/Slamf1/Irs2/Tirap/Jak3/Traf6/Ccr7/Tfrc/Il6	11
GO:0046683	response to organophosphorus	8/479	54/11002	0.00216958	0.00216958	0.014914	Junb/Il1b/Jun/Mat2a/Jund/Crem/Per1/P2ry6	8
GO:0002724	regulation of T cell cytokine production	5/479	22/11002	0.00217937	0.00217937	0.014914	Arid5a/Il1b/Slamf1/Traf6/Il6	5
GO:0036003	positive regulation of transcription from RNA polymerase II promoter in response to stress	5/479	22/11002	0.00217937	0.00217937	0.014914	Notch1/Atf4/Cebpb/Rbpj/Atf6	5
GO:1902624	positive regulation of neutrophil migration	5/479	22/11002	0.00217937	0.00217937	0.014914	C5ar1/Il1b/Tirap/Il1a/Ccr7	5
GO:2000515	negative regulation of CD4-positive, alpha-beta T cell activation	5/479	22/11002	0.00217937	0.00217937	0.014914	Runx1/Il4ra/Irf1/Jak3/Zc3h12a	5
GO:0010975	regulation of neuron projection development	32/479	431/11002	0.00220707	0.00220707	0.0150708	Sema6b/Sphk1/Abl2/Klf4/Skil/Rbpj/Adamts1/Srf/Sema4c/Mapk6/Cx3cl1/Sez6/Ndel1/Zswim4/Grin1/Paqr3/Tnfrsf12a/Id1/Trpv4/Syne1/Shank1/Trim46/Syt2/Inpp5j/Il6/Rims2/Sema7a/Kalrn/Nedd4/Syt1/Lrp8/Ptprd	32
GO:0042330	taxis	26/479	327/11002	0.00221983	0.00221983	0.0151252	Dusp1/Sema6b/Id2/C5ar1/Il1b/Notch1/Nr4a1/Slamf1/Il17ra/Tirap/Sema4c/Cx3cl1/Egr2/Flot1/Serpine1/Fcgr3/Zswim4/Trem1/Cxcl2/Cxcl1/Trpv4/Ccr7/Klf7/Cxcr5/Sema7a/Ablim1	26
GO:0050867	positive regulation of cell activation	20/479	228/11002	0.00227145	0.00227145	0.0152812	Il1b/Cd83/Runx1/Il4ra/Myd88/Ticam1/Nfkbiz/Irf1/Slamf1/Irs2/Tirap/Jak3/Xbp1/Hsp90aa1/Traf6/Nfkbid/Ccr7/Tfrc/Il6/Lck	20
GO:0009636	response to toxic substance	19/479	212/11002	0.00227199	0.00227199	0.0152812	Kdm6b/Egr1/Mt1/Mt2/Sphk1/Tnf/Fas/Ppp1r15b/Rela/Bcl2l1/Ripk1/Zc3h12a/Gch1/Grin1/Adora2a/Scn2b/Il6/Rnf112/Lck	19
GO:0002437	inflammatory response to antigenic stimulus	6/479	32/11002	0.00227663	0.00227663	0.0152812	Icam1/Notch1/Tnf/Rbpj/Fcgr3/Ccr7	6
GO:0002673	regulation of acute inflammatory response	6/479	32/11002	0.00227663	0.00227663	0.0152812	Ptgs2/Il1b/Tnf/Fcgr3/Ccr7/Il6	6
GO:0032757	positive regulation of interleukin-8 production	6/479	32/11002	0.00227663	0.00227663	0.0152812	Il1b/Myd88/Tnf/Tirap/Ripk1/Serpine1	6
GO:0090278	negative regulation of peptide hormone secretion	6/479	32/11002	0.00227663	0.00227663	0.0152812	Midn/Hmgcr/Pim3/Ucp2/Klf7/Kalrn	6
GO:2001239	regulation of extrinsic apoptotic signaling pathway in absence of ligand	6/479	32/11002	0.00227663	0.00227663	0.0152812	Il1b/Mcl1/Tnf/Jak3/Ripk1/Cx3cl1	6
GO:0034612	response to tumor necrosis factor	13/479	121/11002	0.00230185	0.00230185	0.0154177	Zfp36/Nfkbia/Sphk1/Tnf/Casp4/Irf1/Rela/Ripk1/Zc3h12a/Cx3cl1/Gch1/Il6/Ocstamp	13
GO:0032606	type I interferon production	10/479	80/11002	0.00237751	0.00237751	0.0158666	Cgas/Myd88/Ticam1/Irf1/Polr3d/Tirap/Flot1/Nlrx1/Trim56/Rel	10
GO:2000116	regulation of cysteine-type endopeptidase activity	16/479	166/11002	0.00237893	0.00237893	0.0158666	Ptgs2/Plaur/Siah2/F3/Tnf/Klf4/Nr4a1/Casp4/Fas/Myc/Hip1/Grin1/Cdkn2d/Adora2a/Il6/Lck	16
GO:0051402	neuron apoptotic process	19/479	213/11002	0.00239668	0.00239668	0.0159512	C5ar1/Il1b/Egr1/Mt1/Jun/Mcl1/Atf4/Tnf/Fas/Cebpb/Bcl2l1/Cx3cl1/Grin1/Adora2a/Grik2/Prnp/Nrbp2/Tyro3/Grik5	19
GO:0032946	positive regulation of mononuclear cell proliferation	11/479	94/11002	0.00250284	0.00250284	0.0163878	Il1b/Myd88/Ticam1/Slamf1/Irs2/Tirap/Jak3/Traf6/Ccr7/Tfrc/Il6	11
GO:0035743	CD4-positive, alpha-beta T cell cytokine production	4/479	14/11002	0.00250597	0.00250597	0.0163878	Arid5a/Il1b/Slamf1/Il6	4
GO:0042789	mRNA transcription by RNA polymerase II	4/479	14/11002	0.00250597	0.00250597	0.0163878	C5ar1/Stat3/Atf4/Srf	4
GO:0045623	negative regulation of T-helper cell differentiation	4/479	14/11002	0.00250597	0.00250597	0.0163878	Il4ra/Irf1/Jak3/Zc3h12a	4
GO:0051023	regulation of immunoglobulin secretion	4/479	14/11002	0.00250597	0.00250597	0.0163878	Tnf/Xbp1/Traf6/Il6	4
GO:0072567	chemokine (C-X-C motif) ligand 2 production	4/479	14/11002	0.00250597	0.00250597	0.0163878	Myd88/Tnf/Klf4/Tirap	4
GO:1904996	positive regulation of leukocyte adhesion to vascular endothelial cell	4/479	14/11002	0.00250597	0.00250597	0.0163878	Icam1/Tnf/Rela/Traf6	4
GO:2000341	regulation of chemokine (C-X-C motif) ligand 2 production	4/479	14/11002	0.00250597	0.00250597	0.0163878	Myd88/Tnf/Klf4/Tirap	4
GO:0070997	neuron death	24/479	296/11002	0.00250902	0.00250902	0.0163878	C5ar1/Il1b/Fos/Egr1/Mt1/Jun/Stat3/Mcl1/Atf4/Tnf/Fas/Cebpb/Bcl2l1/Cx3cl1/Grin1/Cxcl2/Adora2a/Grik2/Rel/Il6/Prnp/Nrbp2/Tyro3/Grik5	24
GO:0008406	gonad development	12/479	108/11002	0.00252626	0.00252626	0.0164135	Runx1/Icam1/Lfng/Cebpb/Adamts1/Bcl2l1/Il1a/Tiparp/Serpine1/H3f3b/Insl3/Jmjd1c	12
GO:0071356	cellular response to tumor necrosis factor	12/479	108/11002	0.00252626	0.00252626	0.0164135	Zfp36/Nfkbia/Sphk1/Tnf/Casp4/Irf1/Rela/Ripk1/Zc3h12a/Cx3cl1/Il6/Ocstamp	12
GO:0050878	regulation of body fluid levels	16/479	167/11002	0.00252856	0.00252856	0.0164135	Ugcg/F3/Socs2/Srf/Xbp1/Comp/Cx3cl1/Serpine1/Gna13/Trpv4/Adora2a/Atp2b2/Kalrn/Coro2b/Adm/Tyro3	16
GO:0022898	regulation of transmembrane transporter activity	14/479	137/11002	0.00254709	0.00254709	0.0164998	Rrad/Gem/Homer1/Ripk1/P2ry6/Hspa2/Shank1/Scn2b/Prnp/Wnk2/Nedd4/Cacna2d1/Ryr2/Mapk8ip2	14
GO:0009991	response to extracellular stimulus	21/479	247/11002	0.00260708	0.00260708	0.0168432	Pim1/Zfp36/Il1b/Fos/Jun/Slc2a1/Klf10/Nuak2/Atf4/Fas/Ldha/Srf/Xbp1/Tcf7l2/Zc3h12a/Grin1/Slc25a25/Cdkn2d/Trpv4/Tfrc/Ppan	21
GO:0044070	regulation of anion transport	9/479	68/11002	0.00261078	0.00261078	0.0168432	Il1b/Atf4/Tnf/Cebpb/Irs2/Il1a/Ripk1/Adora2a/Prnp	9
GO:0050890	cognition	18/479	199/11002	0.00265349	0.00265349	0.0170838	Ptgs2/C5ar1/Il1b/Egr1/Rcan1/Jun/Abl2/Srf/Hmgcr/Ccnd2/Grin1/Grm4/Shank1/Kalrn/Map1a/Prnp/Mapk8ip2/S100b	18
GO:0043331	response to dsRNA	6/479	33/11002	0.00268208	0.00268208	0.0171564	Cgas/Nfkbia/Ticam1/Pde12/Ddx21/Flot1	6
GO:0045672	positive regulation of osteoclast differentiation	5/479	23/11002	0.00268652	0.00268652	0.0171564	Fos/Klf10/Tnf/Traf6/Ocstamp	5
GO:1902042	negative regulation of extrinsic apoptotic signaling pathway via death domain receptors	5/479	23/11002	0.00268652	0.00268652	0.0171564	Icam1/Bcl2l1/Serpine1/Itprip/Tmbim1	5
GO:1905523	positive regulation of macrophage migration	5/479	23/11002	0.00268652	0.00268652	0.0171564	C5ar1/Slamf1/Cx3cl1/Trpv4/Ccr7	5
GO:0002690	positive regulation of leukocyte chemotaxis	8/479	56/11002	0.00274574	0.00274574	0.0174992	C5ar1/Il1b/Slamf1/Tirap/Cx3cl1/Serpine1/Trpv4/Ccr7	8
GO:0003158	endothelium development	10/479	82/11002	0.00285955	0.00285955	0.0181552	Il1b/Kdm6b/Icam1/Notch1/Myd88/Tnf/Rbpj/Btg1/Id1/Dll4	10
GO:0002683	negative regulation of immune system process	24/479	299/11002	0.00286019	0.00286019	0.0181552	Dusp1/Id2/Zfp36/Runx1/Il4ra/Nfkbia/Notch1/Tnf/Irf1/Slamf1/Fas/Cebpb/Myc/Cd300lf/Jak3/Trib1/Rabgef1/Zc3h12a/Cx3cl1/Nlrx1/Nfkbid/Adora2a/Prnp/Tyro3	24
GO:0000187	activation of MAPK activity	9/479	69/11002	0.00288964	0.00288964	0.0182686	Il1b/Map2k3/Tnf/Ptpn1/Tirap/Ripk1/Grm4/Ccr7/Lpar2	9
GO:0008344	adult locomotory behavior	9/479	69/11002	0.00288964	0.00288964	0.0182686	Id2/Abl2/Sez6/Ccnd2/Grin1/Kalrn/Lgi4/Sez6l2/Sptbn4	9
GO:0000302	response to reactive oxygen species	15/479	154/11002	0.00290509	0.00290509	0.018293	Kdm6b/Fos/Jun/Sphk1/Tnf/Ppp1r15b/Rela/Ripk1/Ucp2/Gch1/Ncf1/Ccr7/Il6/Rnf112/Lck	15
GO:0030072	peptide hormone secretion	15/479	154/11002	0.00290509	0.00290509	0.018293	Il1b/Midn/Tnf/Ildr1/Irs2/Hmgcr/Tcf7l2/Pim3/Ucp2/Trpv4/Klf7/Il6/Rims2/Kalrn/Adcy5	15
GO:0045137	development of primary sexual characteristics	12/479	110/11002	0.00294682	0.00294682	0.0185143	Runx1/Icam1/Lfng/Cebpb/Adamts1/Bcl2l1/Il1a/Tiparp/Serpine1/H3f3b/Insl3/Jmjd1c	12
GO:0072593	reactive oxygen species metabolic process	18/479	201/11002	0.00295709	0.00295709	0.0185143	Ptgs2/Ier3/Il1b/Icam1/Txnrd1/Ticam1/Stat3/Tnf/Klf4/Ripk1/Zc3h12a/Gadd45a/Hsp90aa1/Gch1/Ncf1/Grin1/Cxcl1/Il6	18
GO:0014013	regulation of gliogenesis	11/479	96/11002	0.00295784	0.00295784	0.0185143	Id2/Il1b/Notch1/Tnf/Fas/Myc/Rela/Tcf7l2/Grin1/Il6/Rnf112	11
GO:0002703	regulation of leukocyte mediated immunity	16/479	170/11002	0.00302513	0.00302513	0.0188606	Arid5a/Il1b/Il4ra/Pvr/Ticam1/Tnf/Slamf1/Jak3/Ddx21/Rabgef1/Fcgr3/Traf6/Cxcl1/Tfrc/H60b/Il6	16
GO:0046677	response to antibiotic	16/479	170/11002	0.00302513	0.00302513	0.0188606	Kdm6b/Egr1/Sphk1/Ppp1r15b/Rela/Bcl2l1/Ripk1/Zc3h12a/Slc1a3/Grin1/Jak1/Id1/Il6/Adcy5/Rnf112/Lck	16
GO:0043279	response to alkaloid	7/479	45/11002	0.00306094	0.00306094	0.0190463	Myc/Bcl2l1/Homer1/Grin1/Adora2a/Kalrn/Ryr2	7
GO:0052548	regulation of endopeptidase activity	18/479	202/11002	0.00311943	0.00311943	0.019372	Ptgs2/Plaur/Stat3/Siah2/F3/Tnf/Klf4/Nr4a1/Casp4/Fas/Myc/Hip1/Serpine1/Grin1/Cdkn2d/Adora2a/Il6/Lck	18
GO:1900077	negative regulation of cellular response to insulin stimulus	6/479	34/11002	0.00313933	0.00313933	0.0194573	Socs3/Il1b/Socs2/Rela/Cish/Trim72	6
GO:1901216	positive regulation of neuron death	11/479	97/11002	0.00320908	0.00320908	0.0198506	Il1b/Fos/Egr1/Jun/Mcl1/Atf4/Tnf/Fas/Grik2/Prnp/Grik5	11
GO:0010758	regulation of macrophage chemotaxis	5/479	24/11002	0.00327394	0.00327394	0.0200259	C5ar1/Slamf1/Cx3cl1/Trpv4/Ccr7	5
GO:0045747	positive regulation of Notch signaling pathway	5/479	24/11002	0.00327394	0.00327394	0.0200259	Notch1/Lfng/Stat3/Rbpj/Dll4	5
GO:0048169	regulation of long-term neuronal synaptic plasticity	5/479	24/11002	0.00327394	0.00327394	0.0200259	Egr1/Grin1/Grik2/Syp/S100b	5
GO:2000778	positive regulation of interleukin-6 secretion	5/479	24/11002	0.00327394	0.00327394	0.0200259	Arid5a/Il1b/Tnf/Xbp1/Trpv4	5
GO:0042060	wound healing	18/479	203/11002	0.00328912	0.00328912	0.0200259	B4galt1/F3/Srf/Hmgcr/Xbp1/Comp/Ninj1/Il1a/Cx3cl1/Serpine1/Gna13/Epb41l4b/Tnfrsf12a/Plet1/Insl3/Cnn2/Trim72/Tyro3	18
GO:0002726	positive regulation of T cell cytokine production	4/479	15/11002	0.0033009	0.0033009	0.0200259	Arid5a/Il1b/Traf6/Il6	4
GO:0002827	positive regulation of T-helper 1 type immune response	4/479	15/11002	0.0033009	0.0033009	0.0200259	Arid5a/Il1b/Irf1/Ccr7	4
GO:0071624	positive regulation of granulocyte chemotaxis	4/479	15/11002	0.0033009	0.0033009	0.0200259	C5ar1/Il1b/Tirap/Ccr7	4
GO:0090023	positive regulation of neutrophil chemotaxis	4/479	15/11002	0.0033009	0.0033009	0.0200259	C5ar1/Il1b/Tirap/Ccr7	4
GO:2000316	regulation of T-helper 17 type immune response	4/479	15/11002	0.0033009	0.0033009	0.0200259	Arid5a/Nfkbiz/Zc3h12a/Nfkbid	4
GO:0035637	multicellular organismal signaling	8/479	58/11002	0.00343486	0.00343486	0.0207986	Kcnq2/Grik2/Scn2b/Il6/Cacna2d1/Ryr2/Cntnap1/Sptbn4	8
GO:0007178	transmembrane receptor protein serine/threonine kinase signaling pathway	17/479	188/11002	0.00345535	0.00345535	0.0208427	Fos/Egr1/Gcnt2/Zyx/Jun/Notch1/Myd88/Skil/Rbpj/Xbp1/Comp/Tcf7l2/Meg3/Lrg1/Id1/Ryr2/Fbxl15	17
GO:0048511	rhythmic process	17/479	188/11002	0.00345535	0.00345535	0.0208427	Id2/Egr1/Runx1/Klf10/Siah2/Atf4/Fas/Adamts1/Mat2a/Egr2/Crem/Per1/Grin1/Id1/Adora2a/Il6/Tyro3	17
GO:0006936	muscle contraction	13/479	127/11002	0.00352528	0.00352528	0.0212239	Ptgs2/Sphk1/Map2k3/Srf/Comp/Homer1/Zc3h12a/Ncf1/Scn2b/Myom1/Cacna2d1/Ryr2/Lck	13
GO:0001818	negative regulation of cytokine production	16/479	173/11002	0.00359977	0.00359977	0.0216311	Zfp36/Bcl3/Cd83/Srgn/Tnf/Klf4/Slamf1/Jak3/Rabgef1/Zc3h12a/Cx3cl1/Errfi1/Nlrx1/Rel/Il6/Prnp	16
GO:1903038	negative regulation of leukocyte cell-cell adhesion	10/479	85/11002	0.00372578	0.00372578	0.0223457	Runx1/Il4ra/Klf4/Irf1/Cebpb/Jak3/Zc3h12a/Nfkbid/Adora2a/Prnp	10
GO:0007266	Rho protein signal transduction	13/479	128/11002	0.00377288	0.00377288	0.0225853	Abl2/Rnd1/Cdc42ep2/Plekhg2/Flot1/Gpr65/Gna13/Cdc42ep3/Rhof/Kalrn/Kctd10/Mcf2l/Lpar2	13
GO:0002688	regulation of leukocyte chemotaxis	9/479	72/11002	0.00386947	0.00386947	0.022989	Dusp1/C5ar1/Il1b/Slamf1/Tirap/Cx3cl1/Serpine1/Trpv4/Ccr7	9
GO:0030509	BMP signaling pathway	9/479	72/11002	0.00386947	0.00386947	0.022989	Egr1/Notch1/Skil/Rbpj/Comp/Tcf7l2/Id1/Ryr2/Fbxl15	9
GO:0071772	response to BMP	9/479	72/11002	0.00386947	0.00386947	0.022989	Egr1/Notch1/Skil/Rbpj/Comp/Tcf7l2/Id1/Ryr2/Fbxl15	9
GO:0071773	cellular response to BMP stimulus	9/479	72/11002	0.00386947	0.00386947	0.022989	Egr1/Notch1/Skil/Rbpj/Comp/Tcf7l2/Id1/Ryr2/Fbxl15	9
GO:0008015	blood circulation	20/479	239/11002	0.00390726	0.00390726	0.0231699	Id2/Ptgs2/Ier3/Dusp5/Icam1/Map2k3/Tnf/Hmgcr/Comp/Zc3h12a/Cx3cl1/Gch1/Trpv4/Adora2a/Scn2b/Coro2b/Cacna2d1/Ryr2/Sptbn4/Adm	20
GO:0032729	positive regulation of interferon-gamma production	7/479	47/11002	0.00393688	0.00393688	0.0232701	Arid5a/Il1b/Bcl3/Runx1/Abl2/Tnf/Slamf1	7
GO:0006909	phagocytosis	15/479	159/11002	0.00393891	0.00393891	0.0232701	Il1b/Sphk1/Abl2/Myd88/Rab20/Tgm2/Tnf/Slamf1/Cd300lf/Siglece/Fcgr3/P2ry6/Ccr7/Cnn2/Tyro3	15
GO:1903523	negative regulation of blood circulation	5/479	25/11002	0.0039484	0.0039484	0.0232825	Dusp5/Zc3h12a/Cx3cl1/Sptbn4/Adm	5
GO:0006935	chemotaxis	25/479	324/11002	0.00396957	0.00396957	0.0233637	Dusp1/Sema6b/C5ar1/Il1b/Notch1/Nr4a1/Slamf1/Il17ra/Tirap/Sema4c/Cx3cl1/Egr2/Flot1/Serpine1/Fcgr3/Zswim4/Trem1/Cxcl2/Cxcl1/Trpv4/Ccr7/Klf7/Cxcr5/Sema7a/Ablim1	25
GO:0010001	glial cell differentiation	14/479	144/11002	0.00402001	0.00402001	0.0235693	Id2/C5ar1/Il1b/Nab2/Notch1/Abl2/Stat3/Rela/Tcf7l2/Egr2/Adora2a/Lgi4/Rnf112/Cntnap1	14
GO:0032409	regulation of transporter activity	14/479	144/11002	0.00402001	0.00402001	0.0235693	Rrad/Gem/Homer1/Ripk1/P2ry6/Hspa2/Shank1/Scn2b/Prnp/Wnk2/Nedd4/Cacna2d1/Ryr2/Mapk8ip2	14
GO:0071375	cellular response to peptide hormone stimulus	16/479	175/11002	0.00403062	0.00403062	0.0235693	Socs3/Il1b/Stat3/Nr4a1/Irf1/Socs2/Ptpn1/Irs2/Rela/Xbp1/Cish/Myo1c/Sh2b2/Cpeb2/Ndel1/Trim72	16
GO:0030278	regulation of ossification	13/479	129/11002	0.00403438	0.00403438	0.0235693	Id2/Cebpd/Notch1/Srgn/Chsy1/Tnf/Cebpb/Rbpj/Comp/Jund/Egr2/Id1/Il6	13
GO:0070663	regulation of leukocyte proliferation	15/479	160/11002	0.00417801	0.00417801	0.0243633	Il1b/Myd88/Ticam1/Irf1/Slamf1/Cebpb/Irs2/Tirap/Jak3/Traf6/Ccr7/Tfrc/Il6/Prnp/Ocstamp	15
GO:0002042	cell migration involved in sprouting angiogenesis	6/479	36/11002	0.00422494	0.00422494	0.0244311	Ptgs2/Notch1/Klf4/Nr4a1/Srf/Dll4	6
GO:0051591	response to cAMP	6/479	36/11002	0.00422494	0.00422494	0.0244311	Junb/Jun/Mat2a/Jund/Crem/Per1	6
GO:0014812	muscle cell migration	9/479	73/11002	0.00424821	0.00424821	0.0244311	Egr1/F3/Rbpj/Myc/Adamts1/Trib1/Serpine1/P2ry6/Kalrn	9
GO:0045446	endothelial cell differentiation	9/479	73/11002	0.00424821	0.00424821	0.0244311	Il1b/Kdm6b/Icam1/Notch1/Myd88/Tnf/Rbpj/Btg1/Id1	9
GO:1903305	regulation of regulated secretory pathway	12/479	115/11002	0.00425031	0.00425031	0.0244311	Il4ra/Notch1/Bcl2l1/Rabgef1/Grm4/Adora2a/Syt2/Trim9/Syp/Rims2/Syt1/Grik5	12
GO:0031649	heat generation	4/479	16/11002	0.00425159	0.00425159	0.0244311	Ptgs2/Il1b/Tnf/Il1a	4
GO:0070498	interleukin-1-mediated signaling pathway	4/479	16/11002	0.00425159	0.00425159	0.0244311	Egr1/Il1a/Traf6/Il6	4
GO:0097062	dendritic spine maintenance	4/479	16/11002	0.00425159	0.00425159	0.0244311	Abl2/Homer1/Grin1/Prnp	4
GO:1901617	organic hydroxy compound biosynthetic process	13/479	130/11002	0.00431035	0.00431035	0.0247237	Il1b/Sphk1/Tnf/Ldha/Insig1/Hmgcr/Sptlc2/Gch1/P2ry6/Pmvk/Apob/Cyp51/Plch2	13
GO:0022604	regulation of cell morphogenesis	28/479	379/11002	0.00436406	0.00436406	0.0249863	Sema6b/Icam1/Rnd1/Cdc42ep2/Skil/Srf/Sema4c/Myl12a/Gna13/Ndel1/Zswim4/Grin1/Cdc42ep3/Tnfrsf12a/Id1/Syne1/Trim46/Syt2/Il6/Rims2/Sema7a/Rhof/Kalrn/Nedd4/Syt1/Lrp8/Ptprd/S100b	28
GO:0007612	learning	11/479	101/11002	0.00439065	0.00439065	0.025093	Ptgs2/Jun/Abl2/Srf/Hmgcr/Grin1/Grm4/Shank1/Kalrn/Map1a/Mapk8ip2	11
GO:0043271	negative regulation of ion transport	10/479	87/11002	0.00441037	0.00441037	0.0251601	Ptgs2/Il1b/Rrad/Gem/Icam1/Atf4/Tnf/Irs2/Wnk2/Nedd4	10
GO:0051962	positive regulation of nervous system development	30/479	415/11002	0.00442178	0.00442178	0.0251797	Id2/Il1b/Sphk1/Notch1/Abl2/Tnf/Skil/Socs2/Myc/Adamts1/Srf/Rela/Mapk6/Cx3cl1/Sez6/Ndel1/Grin1/Tnfrsf12a/Shank1/Syt2/Il6/Rims2/Sema7a/Kalrn/Rnf112/Syt1/Lrp8/Ptprd/Tpbg/S100b	30
GO:0032147	activation of protein kinase activity	16/479	177/11002	0.0045029	0.0045029	0.0255954	Il1b/Gadd45g/Map3k8/Map2k3/Tnf/Ptpn1/Gadd45b/Tirap/Ripk1/Gadd45a/Traf6/Grm4/Ccr7/Map3k6/Prnp/Lpar2	16
GO:0031668	cellular response to extracellular stimulus	15/479	162/11002	0.00469176	0.00469176	0.0265711	Pim1/Fos/Jun/Slc2a1/Klf10/Nuak2/Atf4/Fas/Ldha/Srf/Xbp1/Tcf7l2/Zc3h12a/Tfrc/Ppan	15
GO:0048732	gland development	20/479	243/11002	0.00470493	0.00470493	0.0265711	Id2/Runx1/Plaur/Jun/Notch1/Tgm2/B4galt1/Tnf/Cebpb/Socs2/Rbpj/Irs2/Srf/Rela/Xbp1/Tcf7l2/Meg3/Atp2b2/Il6/Kalrn	20
GO:0014910	regulation of smooth muscle cell migration	8/479	61/11002	0.00471129	0.00471129	0.0265711	Egr1/F3/Rbpj/Myc/Adamts1/Trib1/Serpine1/P2ry6	8
GO:0043154	negative regulation of cysteine-type endopeptidase activity involved in apoptotic process	8/479	61/11002	0.00471129	0.00471129	0.0265711	Ptgs2/Plaur/Siah2/Klf4/Nr4a1/Cdkn2d/Adora2a/Il6	8
GO:0051590	positive regulation of neurotransmitter transport	5/479	26/11002	0.00471666	0.00471666	0.0265711	Sphk1/Bcl2l1/Adora2a/Syt2/Syt1	5
GO:0051588	regulation of neurotransmitter transport	11/479	102/11002	0.00473428	0.00473428	0.0266229	Sphk1/Tnf/Bcl2l1/Flot1/Grm4/Adora2a/Syt2/Syp/Rims2/Syt1/Grik5	11
GO:0007626	locomotory behavior	14/479	147/11002	0.00483392	0.00483392	0.0271348	Id2/Egr1/Rcan1/Abl2/Sez6/Ccnd2/Grin1/Adora2a/Atp2b2/Kalrn/Adcy5/Lgi4/Sez6l2/Sptbn4	14
GO:0002027	regulation of heart rate	6/479	37/11002	0.00486126	0.00486126	0.0271915	Gch1/Scn2b/Cacna2d1/Ryr2/Sptbn4/Adm	6
GO:1902041	regulation of extrinsic apoptotic signaling pathway via death domain receptors	6/479	37/11002	0.00486126	0.00486126	0.0271915	Icam1/Skil/Bcl2l1/Serpine1/Itprip/Tmbim1	6
GO:0030336	negative regulation of cell migration	15/479	163/11002	0.00496726	0.00496726	0.0276862	Dusp1/Notch1/Stat3/Klf4/Fas/Rbpj/Srf/Trib1/Gtpbp4/Rabgef1/Cx3cl1/Serpine1/Vash1/Cnn2/Dll4	15
GO:0099003	vesicle-mediated transport in synapse	15/479	163/11002	0.00496726	0.00496726	0.0276862	Actg1/Bcl2l1/Gripap1/Grm4/Syne1/Adora2a/Syt2/Trim9/Syp/Rims2/Sptbn2/Nedd4/Syt1/Grik5/Erc1	15
GO:0050885	neuromuscular process controlling balance	7/479	49/11002	0.00499081	0.00499081	0.0277684	Abl2/Slc1a3/Grin2c/Shank1/Atp2b2/Adcy5/Cntnap1	7
GO:0098655	cation transmembrane transport	27/479	366/11002	0.00517525	0.00517525	0.0286767	Rrad/Marcksl1/Gem/Slc41a1/Slc12a7/Steap4/Homer1/Slc1a3/Kcnq2/Cx3cl1/Grin2c/P2ry6/Grin1/Slc25a25/Hspa2/Trpv4/Shank1/Atp2b2/Scn2b/Plch2/Prnp/Wnk2/Nedd4/Cacna2d1/Ryr2/Lck/Mapk8ip2	27
GO:0035150	regulation of tube size	10/479	89/11002	0.00519041	0.00519041	0.0286767	Ptgs2/Dusp5/Icam1/Tnf/Hmgcr/Comp/Cx3cl1/Gch1/Adora2a/Adm	10
GO:0035296	regulation of tube diameter	10/479	89/11002	0.00519041	0.00519041	0.0286767	Ptgs2/Dusp5/Icam1/Tnf/Hmgcr/Comp/Cx3cl1/Gch1/Adora2a/Adm	10
GO:0097746	regulation of blood vessel diameter	10/479	89/11002	0.00519041	0.00519041	0.0286767	Ptgs2/Dusp5/Icam1/Tnf/Hmgcr/Comp/Cx3cl1/Gch1/Adora2a/Adm	10
GO:0042116	macrophage activation	8/479	62/11002	0.00520885	0.00520885	0.0286781	C5ar1/Sbno2/Il4ra/Jun/Sphk1/Ticam1/Tnf/Cx3cl1	8
GO:0051897	positive regulation of protein kinase B signaling	8/479	62/11002	0.00520885	0.00520885	0.0286781	Gcnt2/Osm/F3/Tnf/Tcf7l2/Cx3cl1/Hsp90aa1/Il6	8
GO:0071496	cellular response to external stimulus	16/479	180/11002	0.00529531	0.00529531	0.0291033	Pim1/Fos/Jun/Slc2a1/Klf10/Nuak2/Atf4/Fas/Ldha/Srf/Xbp1/Tcf7l2/Zc3h12a/Tfrc/Cnn2/Ppan	16
GO:0048265	response to pain	4/479	17/11002	0.00537109	0.00537109	0.0293664	Runx1/Osm/Gch1/Kalrn	4
GO:0048305	immunoglobulin secretion	4/479	17/11002	0.00537109	0.00537109	0.0293664	Tnf/Xbp1/Traf6/Il6	4
GO:0070050	neuron cellular homeostasis	4/479	17/11002	0.00537109	0.00537109	0.0293664	Marcksl1/Cx3cl1/Map1a/Tyro3	4
GO:0001101	response to acid chemical	14/479	149/11002	0.00544697	0.00544697	0.0297297	Egr1/Runx1/Abl2/Tnf/Klf4/Cebpb/Xbp1/Bcl2l1/Zc3h12a/Slc1a3/P2ry6/Grin1/Cdkn2d/Ccr7	14
GO:0032479	regulation of type I interferon production	9/479	76/11002	0.00555995	0.00555995	0.0298189	Cgas/Myd88/Ticam1/Irf1/Polr3d/Tirap/Flot1/Nlrx1/Rel	9
GO:0050868	negative regulation of T cell activation	9/479	76/11002	0.00555995	0.00555995	0.0298189	Runx1/Il4ra/Irf1/Cebpb/Jak3/Zc3h12a/Nfkbid/Adora2a/Prnp	9
GO:1904019	epithelial cell apoptotic process	9/479	76/11002	0.00555995	0.00555995	0.0298189	Zfp36/Icam1/Abl2/Tnf/Fas/Xbp1/Bcl2l1/Serpine1/Ryr2	9
GO:0060563	neuroepithelial cell differentiation	6/479	38/11002	0.00556527	0.00556527	0.0298189	Notch1/Abl2/Cebpb/Rbpj/Serpine1/Atp2b2	6
GO:0014037	Schwann cell differentiation	5/479	27/11002	0.00558539	0.00558539	0.0298189	Nab2/Rela/Egr2/Lgi4/Cntnap1	5
GO:0043330	response to exogenous dsRNA	5/479	27/11002	0.00558539	0.00558539	0.0298189	Cgas/Nfkbia/Ticam1/Ddx21/Flot1	5
GO:0045604	regulation of epidermal cell differentiation	5/479	27/11002	0.00558539	0.00558539	0.0298189	Zfp36/Notch1/Errfi1/Maff/Klf7	5
GO:0046676	negative regulation of insulin secretion	5/479	27/11002	0.00558539	0.00558539	0.0298189	Midn/Hmgcr/Pim3/Ucp2/Klf7	5
GO:0060043	regulation of cardiac muscle cell proliferation	5/479	27/11002	0.00558539	0.00558539	0.0298189	Pim1/Notch1/Rbpj/Ripk1/Mapk11	5
GO:0097242	amyloid-beta clearance	5/479	27/11002	0.00558539	0.00558539	0.0298189	C5ar1/Tnf/Srf/Hmgcr/Cyp51	5
GO:0030279	negative regulation of ossification	7/479	50/11002	0.00559112	0.00559112	0.0298189	Id2/Notch1/Srgn/Chsy1/Tnf/Rbpj/Id1	7
GO:0032648	regulation of interferon-beta production	7/479	50/11002	0.00559112	0.00559112	0.0298189	Ticam1/Irf1/Polr3d/Tirap/Flot1/Nlrx1/Rel	7
GO:0070373	negative regulation of ERK1 and ERK2 cascade	7/479	50/11002	0.00559112	0.00559112	0.0298189	Dusp1/Klf4/Ptpn1/Xbp1/Errfi1/Wnk2/Spry4	7
GO:0050769	positive regulation of neurogenesis	28/479	386/11002	0.00559565	0.00559565	0.0298189	Id2/Il1b/Sphk1/Notch1/Abl2/Tnf/Skil/Socs2/Myc/Adamts1/Srf/Rela/Mapk6/Cx3cl1/Sez6/Ndel1/Grin1/Tnfrsf12a/Shank1/Syt2/Il6/Rims2/Sema7a/Kalrn/Rnf112/Syt1/Lrp8/Ptprd	28
GO:0008625	extrinsic apoptotic signaling pathway via death domain receptors	8/479	63/11002	0.00574558	0.00574558	0.0305148	Icam1/Tnf/Fas/Skil/Bcl2l1/Serpine1/Itprip/Tmbim1	8
GO:1900076	regulation of cellular response to insulin stimulus	8/479	63/11002	0.00574558	0.00574558	0.0305148	Socs3/Il1b/Socs2/Ptpn1/Rela/Cish/Myo1c/Trim72	8
GO:0045665	negative regulation of neuron differentiation	15/479	166/11002	0.0058734	0.0058734	0.0311083	Sema6b/Id2/Il1b/Notch1/Rbpj/Sema4c/Sez6/Lbx1/Ddx6/Paqr3/Id1/Trpv4/Trim46/Inpp5j/Sema7a	15
GO:0003013	circulatory system process	20/479	248/11002	0.00588691	0.00588691	0.0311083	Id2/Ptgs2/Ier3/Dusp5/Icam1/Map2k3/Tnf/Hmgcr/Comp/Zc3h12a/Cx3cl1/Gch1/Trpv4/Adora2a/Scn2b/Coro2b/Cacna2d1/Ryr2/Sptbn4/Adm	20
GO:0048638	regulation of developmental growth	20/479	248/11002	0.00588691	0.00588691	0.0311083	Pim1/Sema6b/Notch1/Stat3/Socs2/Rbpj/Srf/Sema4c/Ripk1/Tcf7l2/Serpine1/Ndel1/Tnfrsf12a/Trim46/Syt2/Rims2/Sema7a/Mapk11/Syt1/Sptbn4	20
GO:0010817	regulation of hormone levels	21/479	265/11002	0.0058996	0.0058996	0.0311232	Il1b/Egr1/Runx1/Osm/Midn/Tnf/Ildr1/Irs2/Hmgcr/Tcf7l2/Pim3/Ucp2/Tiparp/Trpv4/Pcsk2/Klf7/Il6/Rims2/Kalrn/Adcy5/Adm	21
GO:0000904	cell morphogenesis involved in differentiation	34/479	497/11002	0.00594816	0.00594816	0.031327	Sema6b/Id2/Notch1/Abl2/Skil/Srf/Sema4c/Slc1a3/Egr2/Hsp90aa1/Flot1/Ndel1/Zswim4/Grin1/Itgb7/Tnfrsf12a/Id1/Nptx1/Syne1/Jmjd1c/Shank1/Trim46/Klf7/Atp2b2/Sema7a/Kalrn/Map1a/Nedd4/Ablim1/Sptbn4/Lrp8/Mapk8ip2/Ptprd/Tyro3	34
GO:0090276	regulation of peptide hormone secretion	12/479	120/11002	0.00598041	0.00598041	0.0314444	Il1b/Midn/Tnf/Ildr1/Irs2/Hmgcr/Tcf7l2/Pim3/Ucp2/Klf7/Kalrn/Adcy5	12
GO:0050670	regulation of lymphocyte proliferation	14/479	151/11002	0.00612111	0.00612111	0.0321306	Il1b/Myd88/Ticam1/Irf1/Slamf1/Cebpb/Irs2/Tirap/Jak3/Traf6/Ccr7/Tfrc/Il6/Prnp	14
GO:0003006	developmental process involved in reproduction	33/479	480/11002	0.00621431	0.00621431	0.0325657	Socs3/Ptgs2/Junb/Il1b/Runx1/Plaur/Icam1/Notch1/Lfng/B4galt1/Irf2bpl/Casp4/Cebpb/Rbpj/Adamts1/Bcl2l1/Il1a/Tcf7l2/Paqr8/Tiparp/Aff4/Crem/Serpine1/H3f3b/Apob/Hspa2/Vash1/Insl3/Syne1/Jmjd1c/Taf4b/Adm/Tyro3	33
GO:0002064	epithelial cell development	13/479	136/11002	0.00630247	0.00630247	0.0329183	Fosl2/Il1b/Icam1/Notch1/Myd88/B4galt1/Tnf/Xbp1/Il1a/Adamtsl4/Id1/Jmjd1c/Atp2b2	13
GO:0002685	regulation of leukocyte migration	13/479	136/11002	0.00630247	0.00630247	0.0329183	Dusp1/C5ar1/Il1b/Icam1/Myd88/Slamf1/Tirap/Il1a/Rabgef1/Cx3cl1/Serpine1/Trpv4/Ccr7	13
GO:0015698	inorganic anion transport	8/479	64/11002	0.00632341	0.00632341	0.0329186	Atf4/Cebpb/Slc12a7/Slc1a3/P2ry6/Gabrd/Slc20a1/Prnp	8
GO:2000300	regulation of synaptic vesicle exocytosis	8/479	64/11002	0.00632341	0.00632341	0.0329186	Bcl2l1/Grm4/Adora2a/Syt2/Syp/Rims2/Syt1/Grik5	8
GO:0007422	peripheral nervous system development	6/479	39/11002	0.00634098	0.00634098	0.0329557	Osm/Nab2/Rela/Egr2/Lgi4/Cntnap1	6
GO:1901215	negative regulation of neuron death	15/479	168/11002	0.00654834	0.00654834	0.0338768	C5ar1/Mt1/Jun/Stat3/Atf4/Cebpb/Bcl2l1/Cx3cl1/Grin1/Adora2a/Grik2/Rel/Il6/Nrbp2/Tyro3	15
GO:0001935	endothelial cell proliferation	10/479	92/11002	0.00655858	0.00655858	0.0338768	Jun/Stat3/F3/Tnf/Nr4a1/Xbp1/Lrg1/Prkx/Vash1/Dll4	10
GO:0008286	insulin receptor signaling pathway	10/479	92/11002	0.00655858	0.00655858	0.0338768	Socs3/Il1b/Socs2/Ptpn1/Irs2/Rela/Cish/Sh2b2/Ndel1/Trim72	10
GO:0045601	regulation of endothelial cell differentiation	5/479	28/11002	0.00656116	0.00656116	0.0338768	Il1b/Notch1/Tnf/Btg1/Id1	5
GO:1901186	positive regulation of ERBB signaling pathway	4/479	18/11002	0.00667171	0.00667171	0.0343518	Plaur/Rbpj/Hip1/Ncf1	4
GO:0062197	cellular response to chemical stress	19/479	234/11002	0.00667493	0.00667493	0.0343518	Ptgs2/Kdm6b/Fos/Jun/Sphk1/Mcl1/Atf4/Tnf/Fas/Rela/Xbp1/Ripk1/Zc3h12a/Gch1/Cpeb2/Ncf1/Trpv4/Il6/Rnf112	19
GO:0003012	muscle system process	17/479	201/11002	0.00675238	0.00675238	0.0346938	Ptgs2/Sphk1/Notch1/Map2k3/Klf4/Srf/Comp/Homer1/Zc3h12a/Ncf1/Errfi1/Trim72/Scn2b/Myom1/Cacna2d1/Ryr2/Lck	17
GO:0001649	osteoblast differentiation	11/479	107/11002	0.00678505	0.00678505	0.0347484	Id2/Junb/Cebpd/Notch1/Tnf/Trp53inp2/Cebpb/Jund/H3f3b/Id1/Il6	11
GO:0034341	response to interferon-gamma	11/479	107/11002	0.00678505	0.00678505	0.0347484	Zyx/Rab20/Cdc42ep2/Pde12/Irf1/Actg1/Cx3cl1/Myo1c/Gbp7/Gch1/Ifitm7	11
GO:0001763	morphogenesis of a branching structure	12/479	122/11002	0.00681175	0.00681175	0.0348287	Socs3/Il1b/Notch1/Tgm2/B4galt1/Tnf/Myc/Srf/Gna13/Il6/Adm/Dll4	12
GO:0032944	regulation of mononuclear cell proliferation	14/479	153/11002	0.00686054	0.00686054	0.0349648	Il1b/Myd88/Ticam1/Irf1/Slamf1/Cebpb/Irs2/Tirap/Jak3/Traf6/Ccr7/Tfrc/Il6/Prnp	14
GO:0043406	positive regulation of MAP kinase activity	14/479	153/11002	0.00686054	0.00686054	0.0349648	Il1b/Gadd45g/Map2k3/Tnf/Ptpn1/Gadd45b/Tirap/Ripk1/Gadd45a/Traf6/Grm4/Ccr7/Map3k6/Lpar2	14
GO:0048008	platelet-derived growth factor receptor signaling pathway	7/479	52/11002	0.00695182	0.00695182	0.0353728	Csrnp1/Zfand5/Abl2/F3/Ptpn1/Hip1/Tiparp	7
GO:0046928	regulation of neurotransmitter secretion	9/479	79/11002	0.00716474	0.00716474	0.0363975	Sphk1/Bcl2l1/Grm4/Adora2a/Syt2/Syp/Rims2/Syt1/Grik5	9
GO:0062012	regulation of small molecule metabolic process	18/479	219/11002	0.00722456	0.00722456	0.0366424	Ptgs2/Ier3/Il1b/Ppp1r3b/Egr1/Midn/Stat3/Tnf/Myc/Insig1/Irs2/Ppp1r3d/Bcl2l1/Tcf7l2/Ttc39b/P2ry6/Apob/Il6	18
GO:0043433	negative regulation of DNA-binding transcription factor activity	12/479	123/11002	0.00726025	0.00726025	0.0367446	Pim1/Id2/Nfkbia/Klf4/Trib1/Tcf7l2/Zc3h12a/Rlim/Nfkbid/Id1/Prnp/Hr	12
GO:0003018	vascular process in circulatory system	11/479	108/11002	0.007268	0.007268	0.0367446	Ptgs2/Dusp5/Icam1/Tnf/Hmgcr/Comp/Cx3cl1/Gch1/Trpv4/Adora2a/Adm	11
GO:2000146	negative regulation of cell motility	15/479	170/11002	0.00728424	0.00728424	0.0367678	Dusp1/Notch1/Stat3/Klf4/Fas/Rbpj/Srf/Trib1/Gtpbp4/Rabgef1/Cx3cl1/Serpine1/Vash1/Cnn2/Dll4	15
GO:0052547	regulation of peptidase activity	18/479	220/11002	0.00756174	0.00756174	0.0381075	Ptgs2/Plaur/Stat3/Siah2/F3/Tnf/Klf4/Nr4a1/Casp4/Fas/Myc/Hip1/Serpine1/Grin1/Cdkn2d/Adora2a/Il6/Lck	18
GO:2000117	negative regulation of cysteine-type endopeptidase activity	8/479	66/11002	0.00761007	0.00761007	0.0382488	Ptgs2/Plaur/Siah2/Klf4/Nr4a1/Cdkn2d/Adora2a/Il6	8
GO:0002369	T cell cytokine production	5/479	29/11002	0.00765039	0.00765039	0.0382488	Arid5a/Il1b/Slamf1/Traf6/Il6	5
GO:0007616	long-term memory	5/479	29/11002	0.00765039	0.00765039	0.0382488	Egr1/Srf/Ccnd2/Grin1/Shank1	5
GO:0010718	positive regulation of epithelial to mesenchymal transition	5/479	29/11002	0.00765039	0.00765039	0.0382488	Il1b/Gcnt2/Notch1/Tcf7l2/Il6	5
GO:2000351	regulation of endothelial cell apoptotic process	5/479	29/11002	0.00765039	0.00765039	0.0382488	Icam1/Abl2/Tnf/Xbp1/Serpine1	5
GO:0002274	myeloid leukocyte activation	14/479	155/11002	0.00766958	0.00766958	0.038284	C5ar1/Sbno2/Il4ra/Jun/Sphk1/Ticam1/Tnf/Slamf1/Rbpj/Cd300lf/Rabgef1/Cx3cl1/Fcgr3/Traf6	14
GO:0002532	production of molecular mediator involved in inflammatory response	7/479	53/11002	0.00771759	0.00771759	0.0383358	Il4ra/Myd88/Ticam1/Il17ra/Zc3h12a/Serpine1/Per1	7
GO:0042742	defense response to bacterium	12/479	124/11002	0.00773165	0.00773165	0.0383358	C5ar1/Bcl3/Myd88/Tnf/Cebpb/Rbpj/Tirap/Gbp7/Serpine1/Ncf1/Trem1/Adamts4	12
GO:0050768	negative regulation of neurogenesis	17/479	204/11002	0.00779389	0.00779389	0.0383358	Sema6b/Id2/Il1b/Notch1/Stat3/Fas/Rbpj/Sema4c/Sez6/Lbx1/Ddx6/Paqr3/Id1/Trpv4/Trim46/Inpp5j/Sema7a	17
GO:0003214	cardiac left ventricle morphogenesis	3/479	10/11002	0.00782578	0.00782578	0.0383358	Notch1/Rbpj/Ryr2	3
GO:0010460	positive regulation of heart rate	3/479	10/11002	0.00782578	0.00782578	0.0383358	Gch1/Ryr2/Adm	3
GO:0031652	positive regulation of heat generation	3/479	10/11002	0.00782578	0.00782578	0.0383358	Ptgs2/Il1b/Tnf	3
GO:0045628	regulation of T-helper 2 cell differentiation	3/479	10/11002	0.00782578	0.00782578	0.0383358	Il4ra/Irf1/Il6	3
GO:0071639	positive regulation of monocyte chemotactic protein-1 production	3/479	10/11002	0.00782578	0.00782578	0.0383358	Il1b/Il1a/Trpv4	3
GO:0097084	vascular smooth muscle cell development	3/479	10/11002	0.00782578	0.00782578	0.0383358	Notch1/Comp/Adm	3
GO:1902950	regulation of dendritic spine maintenance	3/479	10/11002	0.00782578	0.00782578	0.0383358	Homer1/Grin1/Prnp	3
GO:1990440	positive regulation of transcription from RNA polymerase II promoter in response to endoplasmic reticulum stress	3/479	10/11002	0.00782578	0.00782578	0.0383358	Atf4/Cebpb/Atf6	3
GO:2001171	positive regulation of ATP biosynthetic process	3/479	10/11002	0.00782578	0.00782578	0.0383358	Stat3/Myc/Bcl2l1	3
GO:0006897	endocytosis	26/479	360/11002	0.0078599	0.0078599	0.0384433	Sphk1/Rab20/Ston1/Ptpn1/Hip1/Actg1/Scamp1/Bcl2l1/Rabgef1/Flot1/Serpine1/Cltb/Siglece/Fcgr3/Aplp1/Snx18/Ccr7/Snx12/Syne1/Tfrc/Syt2/Syp/Nedd4/Syt1/Adm/Lrp8	26
GO:0051961	negative regulation of nervous system development	18/479	221/11002	0.00791152	0.00791152	0.0386359	Sema6b/Id2/Il1b/Notch1/Stat3/Tnf/Fas/Rbpj/Sema4c/Sez6/Lbx1/Ddx6/Paqr3/Id1/Trpv4/Trim46/Inpp5j/Sema7a	18
GO:0032870	cellular response to hormone stimulus	24/479	325/11002	0.00803413	0.00803413	0.039174	Socs3/Zfp36/Junb/Il1b/Ugcg/Jun/Notch1/Stat3/Nr4a1/Irf1/Socs2/Ptpn1/Irs2/Rela/Xbp1/Jund/Cish/Myo1c/Sh2b2/Cpeb2/Per1/Ndel1/P2ry6/Trim72	24
GO:0097755	positive regulation of blood vessel diameter	6/479	41/11002	0.0081234	0.0081234	0.0395481	Dusp5/Tnf/Cx3cl1/Gch1/Adora2a/Adm	6
GO:0045933	positive regulation of muscle contraction	4/479	19/11002	0.00816495	0.00816495	0.0395672	Ptgs2/Sphk1/Srf/Lck	4
GO:0060252	positive regulation of glial cell proliferation	4/479	19/11002	0.00816495	0.00816495	0.0395672	Il1b/Tnf/Myc/Il6	4
GO:0090022	regulation of neutrophil chemotaxis	4/479	19/11002	0.00816495	0.00816495	0.0395672	C5ar1/Il1b/Tirap/Ccr7	4
GO:0031644	regulation of nervous system process	10/479	95/11002	0.00819157	0.00819157	0.0396353	Tnf/Il1a/Homer1/Grin1/Nptx1/Syne1/Shank1/Il6/Rims2/S100b	10
GO:0010720	positive regulation of cell development	30/479	434/11002	0.00824029	0.00824029	0.03981	Id2/Il1b/Runx1/Sphk1/Notch1/Abl2/Tnf/Skil/Socs2/Myc/Adamts1/Srf/Rela/Trib1/Mapk6/Cx3cl1/Sez6/Ndel1/Grin1/Tnfrsf12a/Shank1/Syt2/Il6/Rims2/Sema7a/Kalrn/Rnf112/Syt1/Lrp8/Ptprd	30
GO:0046660	female sex differentiation	8/479	67/11002	0.0083228	0.0083228	0.0401472	Runx1/Lfng/Cebpb/Adamts1/Bcl2l1/Tiparp/Serpine1/Tyro3	8
GO:0032869	cellular response to insulin stimulus	13/479	141/11002	0.00847036	0.00847036	0.0407966	Socs3/Il1b/Socs2/Ptpn1/Irs2/Rela/Xbp1/Cish/Myo1c/Sh2b2/Cpeb2/Ndel1/Trim72	13
GO:1905114	cell surface receptor signaling pathway involved in cell-cell signaling	23/479	309/11002	0.00853989	0.00853989	0.0409429	Egr1/Notch1/Abl2/Siah2/Klf4/Rbpj/Myc/Tcf7l2/Tmem88/Cx3cl1/Sez6/Grin2c/Grin1/Syne1/Shank1/Adora2a/Grik2/Rims2/Wnk2/Ryr2/Mapk8ip2/Tyro3/Grik5	23
GO:0002637	regulation of immunoglobulin production	7/479	54/11002	0.00854388	0.00854388	0.0409429	Il4ra/Cgas/Tnf/Xbp1/Traf6/Tfrc/Il6	7
GO:0048708	astrocyte differentiation	7/479	54/11002	0.00854388	0.00854388	0.0409429	Id2/C5ar1/Il1b/Notch1/Abl2/Stat3/Adora2a	7
GO:0030100	regulation of endocytosis	14/479	157/11002	0.00855265	0.00855265	0.0409429	Sphk1/Rab20/Ston1/Ptpn1/Hip1/Bcl2l1/Rabgef1/Flot1/Serpine1/Siglece/Ccr7/Snx12/Syne1/Nedd4	14
GO:0002687	positive regulation of leukocyte migration	10/479	96/11002	0.00880014	0.00880014	0.0420638	C5ar1/Il1b/Icam1/Slamf1/Tirap/Il1a/Cx3cl1/Serpine1/Trpv4/Ccr7	10
GO:0002888	positive regulation of myeloid leukocyte mediated immunity	5/479	30/11002	0.00885932	0.00885932	0.0421223	Il4ra/Ticam1/Ddx21/Fcgr3/Cxcl1	5
GO:0006984	ER-nucleus signaling pathway	5/479	30/11002	0.00885932	0.00885932	0.0421223	Atf4/Ppp1r15b/Ptpn1/Insig1/Atf6	5
GO:1900015	regulation of cytokine production involved in inflammatory response	5/479	30/11002	0.00885932	0.00885932	0.0421223	Myd88/Ticam1/Il17ra/Zc3h12a/Per1	5
GO:0061138	morphogenesis of a branching epithelium	11/479	111/11002	0.00887913	0.00887913	0.0421223	Socs3/Notch1/Tgm2/B4galt1/Tnf/Myc/Srf/Gna13/Il6/Adm/Dll4	11
GO:1903522	regulation of blood circulation	11/479	111/11002	0.00887913	0.00887913	0.0421223	Ptgs2/Dusp5/Icam1/Zc3h12a/Cx3cl1/Gch1/Scn2b/Cacna2d1/Ryr2/Sptbn4/Adm	11
GO:0060322	head development	28/479	400/11002	0.00893825	0.00893825	0.0423391	Id2/C5ar1/Kdm6b/Csrnp1/Zfand5/Sphk1/Notch1/Abl2/Rbpj/Irs2/Srf/Sema4c/Tcf7l2/Tiparp/Egr2/Sez6/Ndel1/Aplp1/Grin1/Shank1/Atp2b2/Sema7a/Sptbn2/Sez6l2/Slc6a17/Lrp8/Tyro3/Mast1	28
GO:0009615	response to virus	17/479	207/11002	0.00896096	0.00896096	0.042383	Il1b/Bcl3/Cgas/Myd88/Ticam1/Tnf/Irf1/Polr3d/Ddx21/Bcl2l1/Zc3h12a/Ifitm7/Tagap/Nlrx1/Trim56/Il6/Mapk11	17
GO:0040008	regulation of growth	32/479	474/11002	0.00903912	0.00903912	0.0426887	Pim1/Socs3/Sema6b/Rrad/Osm/Sphk1/Notch1/Stat3/Sertad1/Sertad2/Socs2/Rbpj/Srf/Xbp1/Bcl2l1/Sema4c/Ripk1/Tcf7l2/Cish/Serpine1/Ndel1/Cdkn2d/Tnfrsf12a/Trim46/Syt2/Rims2/Sema7a/Tro/Mapk11/Ppan/Syt1/Sptbn4	32
GO:0060402	calcium ion transport into cytosol	9/479	82/11002	0.00910196	0.00910196	0.0429212	Cx3cl1/Grin2c/P2ry6/Grin1/Plch2/Prnp/Cacna2d1/Ryr2/Lck	9
GO:0042509	regulation of tyrosine phosphorylation of STAT protein	6/479	42/11002	0.00913799	0.00913799	0.0429627	Socs3/Osm/Tnf/Irf1/Il6/Lck	6
GO:0071277	cellular response to calcium ion	6/479	42/11002	0.00913799	0.00913799	0.0429627	Junb/Fos/Jun/Jund/Syt2/Syt1	6
GO:0098662	inorganic cation transmembrane transport	24/479	329/11002	0.00927648	0.00927648	0.0435489	Rrad/Marcksl1/Gem/Slc41a1/Slc12a7/Steap4/Slc1a3/Kcnq2/Cx3cl1/Grin2c/P2ry6/Grin1/Slc25a25/Hspa2/Trpv4/Atp2b2/Scn2b/Plch2/Prnp/Wnk2/Nedd4/Cacna2d1/Ryr2/Lck	24
GO:0009743	response to carbohydrate	12/479	127/11002	0.00929108	0.00929108	0.0435526	Il1b/Egr1/Icam1/Irs2/Hmgcr/Xbp1/Tcf7l2/Pim3/Ucp2/Apob/Klf7/Adcy5	12
GO:0098660	inorganic ion transmembrane transport	25/479	347/11002	0.00931665	0.00931665	0.0436077	Rrad/Marcksl1/Gem/Slc41a1/Slc12a7/Steap4/Slc1a3/Kcnq2/Cx3cl1/Grin2c/P2ry6/Grin1/Slc25a25/Hspa2/Trpv4/Slc20a1/Atp2b2/Scn2b/Plch2/Prnp/Wnk2/Nedd4/Cacna2d1/Ryr2/Lck	25
GO:0006066	alcohol metabolic process	17/479	208/11002	0.00937965	0.00937965	0.0437645	Il1b/Sphk1/Tnf/Insig1/Hmgcr/Sptlc2/Gch1/Ttc39b/Chka/P2ry6/Pmvk/Apob/Soat2/Impa2/Inpp5j/Cyp51/Plch2	17
GO:0021700	developmental maturation	15/479	175/11002	0.0094157	0.0094157	0.0437645	Id2/Ptgs2/Runx1/Notch1/Abl2/Rnd1/Rbpj/Xbp1/Sez6/Grin1/Insl3/Shank1/Lgi4/Sez6l2/Sptbn4	15
GO:0008593	regulation of Notch signaling pathway	7/479	55/11002	0.00943339	0.00943339	0.0437645	Nfkbia/Notch1/Lfng/Stat3/Rbpj/Kctd10/Dll4	7
GO:0046626	regulation of insulin receptor signaling pathway	7/479	55/11002	0.00943339	0.00943339	0.0437645	Socs3/Il1b/Socs2/Ptpn1/Rela/Cish/Trim72	7
GO:0071674	mononuclear cell migration	7/479	55/11002	0.00943339	0.00943339	0.0437645	Dusp1/C5ar1/Slamf1/Cx3cl1/Serpine1/Trpv4/Ccr7	7
GO:0097756	negative regulation of blood vessel diameter	7/479	55/11002	0.00943339	0.00943339	0.0437645	Ptgs2/Dusp5/Icam1/Hmgcr/Comp/Cx3cl1/Adm	7
GO:0099504	synaptic vesicle cycle	13/479	143/11002	0.00948621	0.00948621	0.0439449	Actg1/Bcl2l1/Gripap1/Grm4/Adora2a/Syt2/Trim9/Syp/Rims2/Sptbn2/Syt1/Grik5/Erc1	13
GO:0007431	salivary gland development	4/479	20/11002	0.00986148	0.00986148	0.0450895	Tgm2/Tnf/Xbp1/Il6	4
GO:0009299	mRNA transcription	4/479	20/11002	0.00986148	0.00986148	0.0450895	C5ar1/Stat3/Atf4/Srf	4
GO:0032633	interleukin-4 production	4/479	20/11002	0.00986148	0.00986148	0.0450895	Cd83/Notch1/Cebpb/Rbpj	4
GO:0035909	aorta morphogenesis	4/479	20/11002	0.00986148	0.00986148	0.0450895	Notch1/Rbpj/Srf/Dll4	4
GO:0045943	positive regulation of transcription by RNA polymerase I	4/479	20/11002	0.00986148	0.00986148	0.0450895	Atf4/Heatr1/Ppp1r15a/Wdr43	4
GO:0048535	lymph node development	4/479	20/11002	0.00986148	0.00986148	0.0450895	Id2/Jak3/Ccr7/Cxcr5	4
GO:0070741	response to interleukin-6	4/479	20/11002	0.00986148	0.00986148	0.0450895	Sbno2/Stat3/Rela/Il6	4
GO:0071354	cellular response to interleukin-6	4/479	20/11002	0.00986148	0.00986148	0.0450895	Sbno2/Stat3/Rela/Il6	4
GO:0006006	glucose metabolic process	12/479	128/11002	0.00986192	0.00986192	0.0450895	Ppp1r3b/Midn/Atf4/Tnf/Ldha/Myc/Irs2/Ppp1r3d/Tcf7l2/Pgm2/Il6/Pfkp	12
GO:0002444	myeloid leukocyte mediated immunity	8/479	69/11002	0.00989683	0.00989683	0.0451184	Il4ra/Ticam1/Ddx21/Rabgef1/Ncf1/Fcgr3/Trem1/Cxcl1	8
GO:0035418	protein localization to synapse	8/479	69/11002	0.00989683	0.00989683	0.0451184	Homer1/Grin2c/Grin1/Gripap1/Nptx1/Shank1/Kalrn/Map1a	8
GO:1990845	adaptive thermogenesis	10/479	98/11002	0.0101207	0.0101207	0.0457683	Kdm6b/Gadd45g/Il4ra/Notch1/Atf4/Cebpb/Rbpj/Ucp2/Id1/Trpv4	10
GO:0001562	response to protozoan	5/479	31/11002	0.010194	0.010194	0.0457683	Ier3/Bcl3/Il4ra/Gbp7/Il6	5
GO:0002534	cytokine production involved in inflammatory response	5/479	31/11002	0.010194	0.010194	0.0457683	Myd88/Ticam1/Il17ra/Zc3h12a/Per1	5
GO:0035176	social behavior	5/479	31/11002	0.010194	0.010194	0.0457683	Il1b/Grin1/Shank1/Kalrn/Mapk8ip2	5
GO:0050922	negative regulation of chemotaxis	5/479	31/11002	0.010194	0.010194	0.0457683	Dusp1/Sema6b/Notch1/Sema4c/Sema7a	5
GO:0051703	intraspecies interaction between organisms	5/479	31/11002	0.010194	0.010194	0.0457683	Il1b/Grin1/Shank1/Kalrn/Mapk8ip2	5
GO:0072577	endothelial cell apoptotic process	5/479	31/11002	0.010194	0.010194	0.0457683	Icam1/Abl2/Tnf/Xbp1/Serpine1	5
GO:1900449	regulation of glutamate receptor signaling pathway	5/479	31/11002	0.010194	0.010194	0.0457683	Cx3cl1/Shank1/Prnp/Frrs1l/Mapk8ip2	5
GO:0048844	artery morphogenesis	6/479	43/11002	0.01024	0.01024	0.0457683	Notch1/Rbpj/Srf/Comp/Apob/Dll4	6
GO:0034765	regulation of ion transmembrane transport	19/479	244/11002	0.0102458	0.0102458	0.0457683	Rrad/Gem/Tnf/Irs2/Homer1/Ripk1/Kcnq2/Cx3cl1/P2ry6/Kcnab3/Hspa2/Shank1/Scn2b/Prnp/Wnk2/Nedd4/Cacna2d1/Ryr2/Mapk8ip2	19
GO:0010721	negative regulation of cell development	18/479	227/11002	0.010294	0.010294	0.0457683	Sema6b/Id2/Il1b/Notch1/Stat3/Fas/Rbpj/Il1a/Sema4c/Sez6/Lbx1/Ddx6/Paqr3/Id1/Trpv4/Trim46/Inpp5j/Sema7a	18
GO:0042692	muscle cell differentiation	18/479	227/11002	0.010294	0.010294	0.0457683	Kdm6b/Rcan1/Il4ra/Notch1/Rbpj/Srf/Xbp1/Actg1/Comp/Sema4c/Homer1/Flot1/H3f3b/Syne1/Trim72/Myom1/Fer1l5/Adm	18
GO:0002863	positive regulation of inflammatory response to antigenic stimulus	3/479	11/11002	0.0104166	0.0104166	0.0457683	Tnf/Fcgr3/Ccr7	3
GO:0003222	ventricular trabecula myocardium morphogenesis	3/479	11/11002	0.0104166	0.0104166	0.0457683	Notch1/Rbpj/Dll4	3
GO:0007263	nitric oxide mediated signal transduction	3/479	11/11002	0.0104166	0.0104166	0.0457683	Mt1/Mt2/Rasd1	3
GO:0010832	negative regulation of myotube differentiation	3/479	11/11002	0.0104166	0.0104166	0.0457683	Notch1/Xbp1/Trim72	3
GO:0045414	regulation of interleukin-8 biosynthetic process	3/479	11/11002	0.0104166	0.0104166	0.0457683	Bcl3/Tnf/Klf4	3
GO:0045651	positive regulation of macrophage differentiation	3/479	11/11002	0.0104166	0.0104166	0.0457683	Id2/Trib1/Ripk1	3
GO:0046886	positive regulation of hormone biosynthetic process	3/479	11/11002	0.0104166	0.0104166	0.0457683	Il1b/Egr1/Tnf	3
GO:0048745	smooth muscle tissue development	3/479	11/11002	0.0104166	0.0104166	0.0457683	Zfand5/Srf/Tiparp	3
GO:0060914	heart formation	3/479	11/11002	0.0104166	0.0104166	0.0457683	Pim1/Notch1/Rbpj	3
GO:0061323	cell proliferation involved in heart morphogenesis	3/479	11/11002	0.0104166	0.0104166	0.0457683	Pim1/Notch1/Rbpj	3
GO:1901160	primary amino compound metabolic process	3/479	11/11002	0.0104166	0.0104166	0.0457683	Gch1/Chka/Atp2b2	3
GO:1905939	regulation of gonad development	3/479	11/11002	0.0104166	0.0104166	0.0457683	Runx1/Il1a/Insl3	3
GO:2000136	regulation of cell proliferation involved in heart morphogenesis	3/479	11/11002	0.0104166	0.0104166	0.0457683	Pim1/Notch1/Rbpj	3
GO:2000319	regulation of T-helper 17 cell differentiation	3/479	11/11002	0.0104166	0.0104166	0.0457683	Nfkbiz/Zc3h12a/Nfkbid	3
GO:0010951	negative regulation of endopeptidase activity	9/479	84/11002	0.0105979	0.0105979	0.0465002	Ptgs2/Plaur/Siah2/Klf4/Nr4a1/Serpine1/Cdkn2d/Adora2a/Il6	9
GO:0031346	positive regulation of cell projection organization	24/479	333/11002	0.0106711	0.0106711	0.0467561	Sphk1/Abl2/Cdc42ep2/Skil/Adamts1/Srf/Mapk6/Cx3cl1/Sez6/Hsp90aa1/Ndel1/Grin1/Cdc42ep3/Tnfrsf12a/Ccr7/Shank1/Syt2/Il6/Rims2/Sema7a/Kalrn/Syt1/Lrp8/Ptprd	24
GO:0006959	humoral immune response	8/479	70/11002	0.010762	0.010762	0.0470241	Il1b/Bcl3/Notch1/Tnf/Rbpj/Cxcl2/Cxcl1/Ccr7	8
GO:0051592	response to calcium ion	8/479	70/11002	0.010762	0.010762	0.0470241	Junb/Fos/Jun/Homer1/Jund/Syt2/Ryr2/Syt1	8
GO:0045860	positive regulation of protein kinase activity	23/479	316/11002	0.0110059	0.0110059	0.048023	Pim1/Il1b/Gadd45g/Egr1/Map3k8/Nab2/Map2k3/Tnf/Ptpn1/Gadd45b/Tirap/Ripk1/Gadd45a/Hsp90aa1/Ccnd2/Ncf1/Traf6/Grm4/Ccr7/Map3k6/Prnp/Lrp8/Lpar2	23
GO:0038061	NIK/NF-kappaB signaling	9/479	85/11002	0.0114117	0.0114117	0.0495129	Il1b/Sphk1/Tnf/Litaf/Tirap/Rela/Zc3h12a/Traf6/Rel	9
GO:0090066	regulation of anatomical structure size	25/479	353/11002	0.0114121	0.0114121	0.0495129	Sema6b/Ptgs2/Dusp5/Icam1/Cdc42ep2/Tnf/Slc12a7/Srf/Hmgcr/Plekhg2/Comp/Sema4c/Cx3cl1/Myo1c/Hsp90aa1/Gch1/Ndel1/Ppp1r15a/Cdc42ep3/Tnfrsf12a/Trim46/Adora2a/Atp2b2/Sema7a/Adm	25
GO:0050810	regulation of steroid biosynthetic process	6/479	44/11002	0.0114331	0.0114331	0.0495129	Il1b/Egr1/Tnf/Insig1/Il1a/Apob	6
GO:0110110	positive regulation of animal organ morphogenesis	6/479	44/11002	0.0114331	0.0114331	0.0495129	Pim1/Notch1/B4galt1/Rbpj/Myc/Xbp1	6
GO:0002221	pattern recognition receptor signaling pathway	11/479	115/11002	0.0114415	0.0114415	0.0495129	Nfkbia/Myd88/Ticam1/Tnf/Irf1/Cd300lf/Tirap/Rela/Flot1/Nlrx1/Tyro3	11
GO:0034614	cellular response to reactive oxygen species	11/479	115/11002	0.0114415	0.0114415	0.0495129	Kdm6b/Fos/Jun/Sphk1/Tnf/Rela/Ripk1/Gch1/Ncf1/Il6/Rnf112	11
GO:0003229	ventricular cardiac muscle tissue development	5/479	32/11002	0.0116601	0.0116601	0.0503211	Id2/Notch1/Rbpj/Ryr2/Dll4	5
GO:0006940	regulation of smooth muscle contraction	5/479	32/11002	0.0116601	0.0116601	0.0503211	Ptgs2/Sphk1/Srf/Ncf1/Lck	5
GO:0014902	myotube differentiation	8/479	71/11002	0.011682	0.011682	0.0503463	Rcan1/Il4ra/Notch1/Xbp1/Homer1/Flot1/Trim72/Fer1l5	8
GO:0061564	axon development	22/479	300/11002	0.0117362	0.0117362	0.050511	Sema6b/Jun/Notch1/Klf4/Skil/Srf/Sema4c/Egr2/Hsp90aa1/Flot1/Ndel1/Zswim4/Grin1/Tnfrsf12a/Nptx1/Trim46/Klf7/Sema7a/Kalrn/Map1a/Ablim1/Sptbn4	22
GO:0043537	negative regulation of blood vessel endothelial cell migration	4/479	21/11002	0.0117711	0.0117711	0.0505233	Notch1/Klf4/Vash1/Dll4	4
GO:0050982	detection of mechanical stimulus	4/479	21/11002	0.0117711	0.0117711	0.0505233	Tnf/Myc/Atp2b2/Pkd1l3	4
GO:0048634	regulation of muscle organ development	10/479	101/11002	0.0123779	0.0123779	0.0530556	Pim1/Notch1/Rbpj/Hmgcr/Ripk1/Tcf7l2/Flot1/Il6/Mapk11/S100b	10
GO:0007265	Ras protein signal transduction	22/479	302/11002	0.012607	0.012607	0.0539642	Jun/Notch1/Abl2/Rnd1/Rab20/Cdc42ep2/Plekhg2/Rassf1/Rabgef1/Flot1/Sh2b2/Gpr65/Gna13/Cdc42ep3/Dnajc27/Rhof/Kalrn/Kctd10/Dok2/Mcf2l/Lpar2/Spry4	22
GO:0014855	striated muscle cell proliferation	6/479	45/11002	0.0127212	0.0127212	0.0543793	Pim1/Notch1/Stat3/Rbpj/Ripk1/Mapk11	6
GO:0071902	positive regulation of protein serine/threonine kinase activity	16/479	198/11002	0.0127425	0.0127425	0.0543966	Pim1/Il1b/Gadd45g/Map2k3/Tnf/Ptpn1/Gadd45b/Tirap/Ripk1/Gadd45a/Ccnd2/Traf6/Grm4/Ccr7/Map3k6/Lpar2	16
GO:0045055	regulated exocytosis	14/479	165/11002	0.0129167	0.0129167	0.0549952	Il4ra/Notch1/Bcl2l1/Rabgef1/Grm4/Adora2a/Syt2/Trim9/Syp/Rims2/Sptbn2/Syt1/Grik5/Erc1	14
GO:0015850	organic hydroxy compound transport	11/479	117/11002	0.0129175	0.0129175	0.0549952	Nfkbia/Myc/Xbp1/Slc10a6/Ttc39b/Fcgr3/Apob/Soat2/Adora2a/Syt2/Syt1	11
GO:0002224	toll-like receptor signaling pathway	9/479	87/11002	0.0131784	0.0131784	0.0555219	Nfkbia/Myd88/Ticam1/Tnf/Irf1/Cd300lf/Tirap/Flot1/Tyro3	9
GO:0002708	positive regulation of lymphocyte mediated immunity	9/479	87/11002	0.0131784	0.0131784	0.0555219	Arid5a/Il1b/Pvr/Tnf/Fcgr3/Traf6/Tfrc/H60b/Il6	9
GO:0006694	steroid biosynthetic process	9/479	87/11002	0.0131784	0.0131784	0.0555219	Il1b/Egr1/Tnf/Insig1/Hmgcr/Il1a/Pmvk/Apob/Cyp51	9
GO:0007622	rhythmic behavior	5/479	33/11002	0.0132634	0.0132634	0.0555219	Id2/Egr1/Egr2/Adora2a/Il6	5
GO:0030166	proteoglycan biosynthetic process	5/479	33/11002	0.0132634	0.0132634	0.0555219	Chsy1/Hs3st3b1/Chst7/Tcf7l2/Hs3st3a1	5
GO:0060711	labyrinthine layer development	5/479	33/11002	0.0132634	0.0132634	0.0555219	Socs3/Junb/Rbpj/Vash1/Adm	5
GO:1905521	regulation of macrophage migration	5/479	33/11002	0.0132634	0.0132634	0.0555219	C5ar1/Slamf1/Cx3cl1/Trpv4/Ccr7	5
GO:0045786	negative regulation of cell cycle	25/479	358/11002	0.0134361	0.0134361	0.0555219	Id2/Ptgs2/Ier3/Osm/Notch1/Tnf/Gpr132/Klf4/Nr4a1/Irf1/Skil/Myc/Btg1/Bcl2l1/Rassf1/Ripk1/Tcf7l2/Sde2/Nabp1/Gadd45a/Ppp1r10/Cdkn2d/Btg3/Vash1/Rnf112	25
GO:0001963	synaptic transmission, dopaminergic	3/479	12/11002	0.013446	0.013446	0.0555219	Ptgs2/Flot1/Adora2a	3
GO:0002371	dendritic cell cytokine production	3/479	12/11002	0.013446	0.013446	0.0555219	Ticam1/Jak3/Ddx21	3
GO:0002719	negative regulation of cytokine production involved in immune response	3/479	12/11002	0.013446	0.013446	0.0555219	Tnf/Slamf1/Jak3	3
GO:0002730	regulation of dendritic cell cytokine production	3/479	12/11002	0.013446	0.013446	0.0555219	Ticam1/Jak3/Ddx21	3
GO:0010623	programmed cell death involved in cell development	3/479	12/11002	0.013446	0.013446	0.0555219	Il1b/Casp4/Il1a	3
GO:0031650	regulation of heat generation	3/479	12/11002	0.013446	0.013446	0.0555219	Ptgs2/Il1b/Tnf	3
GO:0032494	response to peptidoglycan	3/479	12/11002	0.013446	0.013446	0.0555219	C5ar1/Myd88/Rela	3
GO:0042228	interleukin-8 biosynthetic process	3/479	12/11002	0.013446	0.013446	0.0555219	Bcl3/Tnf/Klf4	3
GO:0046337	phosphatidylethanolamine metabolic process	3/479	12/11002	0.013446	0.013446	0.0555219	Pisd/Chka/Cept1	3
GO:0048266	behavioral response to pain	3/479	12/11002	0.013446	0.013446	0.0555219	Runx1/Osm/Kalrn	3
GO:0048711	positive regulation of astrocyte differentiation	3/479	12/11002	0.013446	0.013446	0.0555219	Id2/Il1b/Notch1	3
GO:0061311	cell surface receptor signaling pathway involved in heart development	3/479	12/11002	0.013446	0.013446	0.0555219	Notch1/Rbpj/Dll4	3
GO:0090051	negative regulation of cell migration involved in sprouting angiogenesis	3/479	12/11002	0.013446	0.013446	0.0555219	Notch1/Klf4/Dll4	3
GO:2000232	regulation of rRNA processing	3/479	12/11002	0.013446	0.013446	0.0555219	Heatr1/Usp36/Wdr43	3
GO:2000811	negative regulation of anoikis	3/479	12/11002	0.013446	0.013446	0.0555219	Notch1/Mcl1/Bcl2l1	3
GO:0008585	female gonad development	7/479	59/11002	0.0136763	0.0136763	0.0563231	Runx1/Lfng/Cebpb/Adamts1/Bcl2l1/Tiparp/Serpine1	7
GO:0030282	bone mineralization	7/479	59/11002	0.0136763	0.0136763	0.0563231	Ptgs2/Sbno2/Srgn/Klf10/Comp/Tcf7l2/Fbxl15	7
GO:0097553	calcium ion transmembrane import into cytosol	8/479	73/11002	0.0136936	0.0136936	0.0563231	Cx3cl1/Grin2c/P2ry6/Grin1/Plch2/Prnp/Ryr2/Lck	8
GO:0030029	actin filament-based process	32/479	489/11002	0.0138089	0.0138089	0.0567232	Zyx/Icam1/Abl2/Rnd1/Cdc42ep2/Nuak2/Tnf/Casp4/Ptpn1/Hip1/Srf/Plekhg2/Actg1/Il1a/Cx3cl1/Myo1c/Sh2b2/Gpr65/Epb41l4b/Cdc42ep3/Id1/Trpv4/Ccr7/Shank1/Cnn2/Scn2b/Rhof/Coro2b/Myom1/Cacna2d1/Ryr2/Cnn3	32
GO:0071695	anatomical structure maturation	12/479	134/11002	0.0138791	0.0138791	0.0568039	Id2/Ptgs2/Runx1/Notch1/Abl2/Rnd1/Rbpj/Xbp1/Grin1/Insl3/Lgi4/Sptbn4	12
GO:0010829	negative regulation of glucose transmembrane transport	4/479	22/11002	0.0139026	0.0139026	0.0568039	Il1b/Tnf/Myc/Sh2b2	4
GO:0035335	peptidyl-tyrosine dephosphorylation	4/479	22/11002	0.0139026	0.0139026	0.0568039	Dusp1/Dusp5/Ptpn1/Ptpn12	4
GO:1901021	positive regulation of calcium ion transmembrane transporter activity	4/479	22/11002	0.0139026	0.0139026	0.0568039	P2ry6/Hspa2/Cacna2d1/Ryr2	4
GO:0045087	innate immune response	29/479	433/11002	0.013933	0.013933	0.0568039	Arid5a/Zyx/Cgas/Pvr/Myd88/Rab20/Ticam1/Cdc42ep2/Pde12/Casp4/Irf1/Slamf1/Polr3d/Tirap/Jak3/Actg1/Ddx21/Cx3cl1/Myo1c/Gbp7/Gch1/Ifitm7/Ipo7/Nlrx1/Trim56/H60b/Clec4n/Lrp8/Tyro3	29
GO:1901615	organic hydroxy compound metabolic process	21/479	287/11002	0.0139366	0.0139366	0.0568039	Il1b/Sphk1/Tnf/Ldha/Insig1/Hmgcr/Sptlc2/Gch1/Ttc39b/Chka/P2ry6/Pmvk/Apob/Soat2/Atp2b2/Impa2/Inpp5j/Cyp51/Plch2/Ldhd/Aoc2	21
GO:0050796	regulation of insulin secretion	10/479	103/11002	0.0140807	0.0140807	0.0571321	Il1b/Midn/Tnf/Irs2/Hmgcr/Tcf7l2/Pim3/Ucp2/Klf7/Adcy5	10
GO:0002886	regulation of myeloid leukocyte mediated immunity	6/479	46/11002	0.0141077	0.0141077	0.0571321	Il4ra/Ticam1/Ddx21/Rabgef1/Fcgr3/Cxcl1	6
GO:0048168	regulation of neuronal synaptic plasticity	6/479	46/11002	0.0141077	0.0141077	0.0571321	Egr1/Grin1/Grik2/Syp/Kalrn/S100b	6
GO:0071774	response to fibroblast growth factor	6/479	46/11002	0.0141077	0.0141077	0.0571321	Ier2/Zfp36/Nr4a1/Tcf7l2/Dll4/Spry4	6
GO:1904894	positive regulation of receptor signaling pathway via STAT	6/479	46/11002	0.0141077	0.0141077	0.0571321	Osm/Notch1/Tnf/Jak1/Il6/Lck	6
GO:0019218	regulation of steroid metabolic process	7/479	60/11002	0.0149212	0.0149212	0.0600116	Il1b/Egr1/Tnf/Insig1/Il1a/Ttc39b/Apob	7
GO:0046545	development of primary female sexual characteristics	7/479	60/11002	0.0149212	0.0149212	0.0600116	Runx1/Lfng/Cebpb/Adamts1/Bcl2l1/Tiparp/Serpine1	7
GO:0001774	microglial cell activation	5/479	34/11002	0.0150089	0.0150089	0.0600116	C5ar1/Jun/Sphk1/Tnf/Cx3cl1	5
GO:0002269	leukocyte activation involved in inflammatory response	5/479	34/11002	0.0150089	0.0150089	0.0600116	C5ar1/Jun/Sphk1/Tnf/Cx3cl1	5
GO:0010830	regulation of myotube differentiation	5/479	34/11002	0.0150089	0.0150089	0.0600116	Il4ra/Notch1/Xbp1/Flot1/Trim72	5
GO:0032715	negative regulation of interleukin-6 production	5/479	34/11002	0.0150089	0.0150089	0.0600116	Tnf/Slamf1/Rabgef1/Zc3h12a/Nlrx1	5
GO:0045058	T cell selection	5/479	34/11002	0.0150089	0.0150089	0.0600116	Stat3/Fas/Srf/Ccr7/Il6	5
GO:0045687	positive regulation of glial cell differentiation	5/479	34/11002	0.0150089	0.0150089	0.0600116	Id2/Il1b/Notch1/Rela/Rnf112	5
GO:0048246	macrophage chemotaxis	5/479	34/11002	0.0150089	0.0150089	0.0600116	C5ar1/Slamf1/Cx3cl1/Trpv4/Ccr7	5
GO:0055008	cardiac muscle tissue morphogenesis	5/479	34/11002	0.0150089	0.0150089	0.0600116	Notch1/Rbpj/Myom1/Ryr2/Dll4	5
GO:0045123	cellular extravasation	6/479	47/11002	0.0155961	0.0155961	0.0622016	Icam1/Tnf/Il1a/Cx3cl1/Trem1/Itgb7	6
GO:1901019	regulation of calcium ion transmembrane transporter activity	6/479	47/11002	0.0155961	0.0155961	0.0622016	Rrad/Gem/P2ry6/Hspa2/Cacna2d1/Ryr2	6
GO:0032612	interleukin-1 production	8/479	75/11002	0.0159471	0.0159471	0.0635212	Il1b/Egr1/Sphk1/Casp4/Zc3h12a/Cx3cl1/Errfi1/Ccr7	8
GO:0007409	axonogenesis	20/479	273/11002	0.0159708	0.0159708	0.0635355	Sema6b/Notch1/Skil/Srf/Sema4c/Egr2/Hsp90aa1/Flot1/Ndel1/Zswim4/Grin1/Tnfrsf12a/Nptx1/Trim46/Klf7/Sema7a/Kalrn/Map1a/Ablim1/Sptbn4	20
GO:0071407	cellular response to organic cyclic compound	21/479	291/11002	0.016059	0.016059	0.0637652	Pim1/Zfp36/Il1b/Egr1/Cgas/Nfkbia/Stat3/Atf4/Tnf/Pde12/Insig1/Zc3h12a/Tiparp/Flot1/Per1/Aplp1/P2ry6/Gramd1a/Adcy5/Ryr2/Nsg2	21
GO:0034762	regulation of transmembrane transport	22/479	309/11002	0.016069	0.016069	0.0637652	Il1b/Rrad/Gem/Tnf/Myc/Irs2/Homer1/Ripk1/Kcnq2/Cx3cl1/Sh2b2/P2ry6/Kcnab3/Hspa2/Shank1/Scn2b/Prnp/Wnk2/Nedd4/Cacna2d1/Ryr2/Mapk8ip2	22
GO:0062013	positive regulation of small molecule metabolic process	9/479	90/11002	0.0161985	0.0161985	0.0641984	Ptgs2/Il1b/Stat3/Tnf/Myc/Irs2/Bcl2l1/Tcf7l2/P2ry6	9
GO:0035886	vascular smooth muscle cell differentiation	4/479	23/11002	0.0162638	0.0162638	0.0642154	Notch1/Srf/Comp/Adm	4
GO:0060074	synapse maturation	4/479	23/11002	0.0162638	0.0162638	0.0642154	Abl2/Sez6/Shank1/Sez6l2	4
GO:0060674	placenta blood vessel development	4/479	23/11002	0.0162638	0.0162638	0.0642154	Socs3/Junb/Rbpj/Vash1	4
GO:0043524	negative regulation of neuron apoptotic process	11/479	121/11002	0.0162982	0.0162982	0.0642707	C5ar1/Mt1/Jun/Cebpb/Bcl2l1/Cx3cl1/Grin1/Adora2a/Grik2/Nrbp2/Tyro3	11
GO:0007600	sensory perception	16/479	204/11002	0.0165296	0.0165296	0.0651017	Ptgs2/Icam1/Tnf/Myc/Il1a/Slc1a3/Grin1/Cdkn2d/Shank1/Atp2b2/Atf6/Map1a/Pkd1l3/Sptbn4/Aoc2/Dll4	16
GO:0007420	brain development	25/479	365/11002	0.0167434	0.0167434	0.0658329	Id2/C5ar1/Kdm6b/Sphk1/Notch1/Abl2/Rbpj/Irs2/Srf/Sema4c/Tcf7l2/Egr2/Sez6/Ndel1/Aplp1/Grin1/Shank1/Atp2b2/Sema7a/Sptbn2/Sez6l2/Slc6a17/Lrp8/Tyro3/Mast1	25
GO:0017157	regulation of exocytosis	13/479	154/11002	0.0168818	0.0168818	0.0658329	Il4ra/Notch1/Bcl2l1/Rabgef1/Grm4/Adora2a/Syt2/Trim9/Syp/Rims2/Lgi3/Syt1/Grik5	13
GO:0042149	cellular response to glucose starvation	5/479	35/11002	0.0169017	0.0169017	0.0658329	Slc2a1/Nuak2/Atf4/Xbp1/Zc3h12a	5
GO:0003156	regulation of animal organ formation	3/479	13/11002	0.0169239	0.0169239	0.0658329	Pim1/Notch1/Rbpj	3
GO:0030810	positive regulation of nucleotide biosynthetic process	3/479	13/11002	0.0169239	0.0169239	0.0658329	Stat3/Myc/Bcl2l1	3
GO:0048843	negative regulation of axon extension involved in axon guidance	3/479	13/11002	0.0169239	0.0169239	0.0658329	Sema6b/Sema4c/Sema7a	3
GO:0090335	regulation of brown fat cell differentiation	3/479	13/11002	0.0169239	0.0169239	0.0658329	Ptgs2/Trpv4/Metrnl	3
GO:1900017	positive regulation of cytokine production involved in inflammatory response	3/479	13/11002	0.0169239	0.0169239	0.0658329	Myd88/Ticam1/Il17ra	3
GO:1900373	positive regulation of purine nucleotide biosynthetic process	3/479	13/11002	0.0169239	0.0169239	0.0658329	Stat3/Myc/Bcl2l1	3
GO:1902668	negative regulation of axon guidance	3/479	13/11002	0.0169239	0.0169239	0.0658329	Sema6b/Sema4c/Sema7a	3
GO:0034763	negative regulation of transmembrane transport	8/479	76/11002	0.0171691	0.0171691	0.0664573	Il1b/Rrad/Gem/Tnf/Myc/Irs2/Sh2b2/Nedd4	8
GO:0048639	positive regulation of developmental growth	12/479	138/11002	0.0171806	0.0171806	0.0664573	Pim1/Notch1/Rbpj/Srf/Serpine1/Ndel1/Tnfrsf12a/Syt2/Rims2/Sema7a/Syt1/Sptbn4	12
GO:0032481	positive regulation of type I interferon production	6/479	48/11002	0.0171897	0.0171897	0.0664573	Cgas/Myd88/Ticam1/Irf1/Polr3d/Flot1	6
GO:0033209	tumor necrosis factor-mediated signaling pathway	6/479	48/11002	0.0171897	0.0171897	0.0664573	Nfkbia/Sphk1/Tnf/Casp4/Rela/Ripk1	6
GO:0061178	regulation of insulin secretion involved in cellular response to glucose stimulus	6/479	48/11002	0.0171897	0.0171897	0.0664573	Hmgcr/Tcf7l2/Pim3/Ucp2/Klf7/Adcy5	6
GO:0030198	extracellular matrix organization	11/479	122/11002	0.0172383	0.0172383	0.0664821	Bcl3/Notch1/Abl2/B4galt1/Tnf/Comp/Adamtsl4/Flot1/Olfml2b/Aplp1/Il6	11
GO:0043062	extracellular structure organization	11/479	122/11002	0.0172383	0.0172383	0.0664821	Bcl3/Notch1/Abl2/B4galt1/Tnf/Comp/Adamtsl4/Flot1/Olfml2b/Aplp1/Il6	11
GO:0048729	tissue morphogenesis	24/479	348/11002	0.0174816	0.0174816	0.067338	Socs3/Kdm6b/Runx1/Notch1/Abl2/Txnrd1/Tgm2/B4galt1/Tnf/Klf4/Rbpj/Myc/Srf/Sema4c/Gna13/Prkx/Lbx1/Traf6/Plet1/Il6/Myom1/Ryr2/Adm/Dll4	24
GO:0042303	molting cycle	7/479	62/11002	0.0176492	0.0176492	0.0678181	Ptgs2/Runx1/Notch1/Tnf/Rbpj/Rela/Per1	7
GO:0042633	hair cycle	7/479	62/11002	0.0176492	0.0176492	0.0678181	Ptgs2/Runx1/Notch1/Tnf/Rbpj/Rela/Per1	7
GO:0044403	symbiotic process	20/479	276/11002	0.0177788	0.0177788	0.0682329	Zfp36/Jun/Icam1/Notch1/Tnf/Pde12/Myc/Bcl2l1/Ripk1/Etf1/Zc3h12a/Gbp7/Ncf1/Trem1/Ifitm7/Ddx6/Chd1/Cxcl1/Nlrx1/Trim56	20
GO:0002449	lymphocyte mediated immunity	15/479	189/11002	0.0180677	0.0180677	0.0692573	Arid5a/Il1b/Bcl3/Il4ra/Pvr/Icam1/Myd88/Tnf/Slamf1/Fas/Fcgr3/Traf6/Tfrc/H60b/Il6	15
GO:0050764	regulation of phagocytosis	8/479	77/11002	0.018457	0.018457	0.0706639	Il1b/Sphk1/Tnf/Cd300lf/Siglece/Fcgr3/Ccr7/Cnn2	8
GO:0048589	developmental growth	31/479	481/11002	0.018501	0.018501	0.0707465	Pim1/Sema6b/Notch1/Abl2/Stat3/Socs2/Rbpj/Srf/Comp/Ninj1/Mex3c/Sema4c/Ripk1/Tcf7l2/Meg3/Hsp90aa1/Serpine1/H3f3b/Ndel1/Slc25a25/Tnfrsf12a/Shank1/Trim46/Syt2/Rims2/Sema7a/Sptbn2/Mapk11/Syt1/Sptbn4/Adm	31
GO:0019318	hexose metabolic process	13/479	156/11002	0.0186001	0.0186001	0.0709864	Ppp1r3b/Midn/B4galt1/Atf4/Tnf/Ldha/Myc/Irs2/Ppp1r3d/Tcf7l2/Pgm2/Il6/Pfkp	13
GO:0034599	cellular response to oxidative stress	16/479	207/11002	0.0187229	0.0187229	0.0709864	Kdm6b/Fos/Jun/Sphk1/Mcl1/Atf4/Tnf/Rela/Xbp1/Ripk1/Zc3h12a/Gch1/Cpeb2/Ncf1/Il6/Rnf112	16
GO:0070661	leukocyte proliferation	16/479	207/11002	0.0187229	0.0187229	0.0709864	Il1b/Myd88/Ticam1/Irf1/Slamf1/Cebpb/Irs2/Tirap/Jak3/Cx3cl1/Traf6/Ccr7/Tfrc/Il6/Prnp/Ocstamp	16
GO:0001779	natural killer cell differentiation	4/479	24/11002	0.0188618	0.0188618	0.0709864	Id2/Irf1/Slamf1/Tyro3	4
GO:0033344	cholesterol efflux	4/479	24/11002	0.0188618	0.0188618	0.0709864	Nfkbia/Ttc39b/Apob/Soat2	4
GO:0042092	type 2 immune response	4/479	24/11002	0.0188618	0.0188618	0.0709864	Bcl3/Il4ra/Irf1/Il6	4
GO:1903959	regulation of anion transmembrane transport	4/479	24/11002	0.0188618	0.0188618	0.0709864	Tnf/Irs2/Ripk1/Prnp	4
GO:0033555	multicellular organismal response to stress	6/479	49/11002	0.0188919	0.0188919	0.0709864	Runx1/Osm/Gch1/Grik2/Kalrn/Mapk8ip2	6
GO:0045670	regulation of osteoclast differentiation	6/479	49/11002	0.0188919	0.0188919	0.0709864	Fos/Klf10/Tnf/Cebpb/Traf6/Ocstamp	6
GO:0050805	negative regulation of synaptic transmission	6/479	49/11002	0.0188919	0.0188919	0.0709864	Ptgs2/Il1b/Srf/Bcl2l1/Syne1/Grik2	6
GO:1901184	regulation of ERBB signaling pathway	6/479	49/11002	0.0188919	0.0188919	0.0709864	Plaur/Rbpj/Hip1/Ptpn12/Ncf1/Errfi1	6
GO:0006695	cholesterol biosynthetic process	5/479	36/11002	0.0189463	0.0189463	0.0709864	Insig1/Hmgcr/Pmvk/Apob/Cyp51	5
GO:0019226	transmission of nerve impulse	5/479	36/11002	0.0189463	0.0189463	0.0709864	Kcnq2/Grik2/Il6/Cntnap1/Sptbn4	5
GO:0045599	negative regulation of fat cell differentiation	5/479	36/11002	0.0189463	0.0189463	0.0709864	Tnf/Jdp2/Insig1/Tcf7l2/Trpv4	5
GO:0060038	cardiac muscle cell proliferation	5/479	36/11002	0.0189463	0.0189463	0.0709864	Pim1/Notch1/Rbpj/Ripk1/Mapk11	5
GO:0060324	face development	5/479	36/11002	0.0189463	0.0189463	0.0709864	Csrnp1/Zfand5/Srf/Tcf7l2/Tiparp	5
GO:0060415	muscle tissue morphogenesis	5/479	36/11002	0.0189463	0.0189463	0.0709864	Notch1/Rbpj/Myom1/Ryr2/Dll4	5
GO:0003007	heart morphogenesis	12/479	140/11002	0.0190378	0.0190378	0.0711601	Pim1/Id2/Jun/Notch1/Rbpj/Adamts1/Srf/Lbx1/Nedd4/Myom1/Ryr2/Dll4	12
GO:0060485	mesenchyme development	12/479	140/11002	0.0190378	0.0190378	0.0711601	Sema6b/Il1b/Gcnt2/Plaur/Notch1/Rbpj/Myc/Sema4c/Tcf7l2/Il6/Sema7a/Nedd4	12
GO:0001667	ameboidal-type cell migration	19/479	261/11002	0.0196794	0.0196794	0.0732972	Sema6b/Ptgs2/Zfand5/Jun/Notch1/Map2k3/Klf4/Nr4a1/Srf/Sema4c/Zc3h12a/Serpine1/Prkx/Epb41l4b/Itgb7/Vash1/Insl3/Sema7a/Dll4	19
GO:0071346	cellular response to interferon-gamma	9/479	93/11002	0.0196972	0.0196972	0.0732972	Zyx/Rab20/Cdc42ep2/Pde12/Irf1/Actg1/Cx3cl1/Myo1c/Gbp7	9
GO:0045926	negative regulation of growth	14/479	174/11002	0.0197025	0.0197025	0.0732972	Sema6b/Rrad/Notch1/Sertad1/Sertad2/Socs2/Sema4c/Ripk1/Tcf7l2/Cdkn2d/Trim46/Sema7a/Tro/Mapk11	14
GO:0051146	striated muscle cell differentiation	14/479	174/11002	0.0197025	0.0197025	0.0732972	Kdm6b/Rcan1/Il4ra/Notch1/Rbpj/Srf/Xbp1/Actg1/Comp/Homer1/Flot1/Trim72/Myom1/Fer1l5	14
GO:0043534	blood vessel endothelial cell migration	8/479	78/11002	0.0198127	0.0198127	0.0734476	Ptgs2/Notch1/Map2k3/Klf4/Nr4a1/Srf/Vash1/Dll4	8
GO:0045667	regulation of osteoblast differentiation	8/479	78/11002	0.0198127	0.0198127	0.0734476	Id2/Cebpd/Notch1/Tnf/Cebpb/Jund/Id1/Il6	8
GO:0048640	negative regulation of developmental growth	8/479	78/11002	0.0198127	0.0198127	0.0734476	Sema6b/Socs2/Sema4c/Ripk1/Tcf7l2/Trim46/Sema7a/Mapk11	8
GO:0002429	immune response-activating cell surface receptor signaling pathway	11/479	125/11002	0.0203017	0.0203017	0.0751721	C5ar1/Nfkbiz/Rela/Rabgef1/Zc3h12a/Sh2b2/Traf6/Nfkbid/Ccr7/Prnp/Lck	11
GO:0030036	actin cytoskeleton organization	29/479	447/11002	0.0205665	0.0205665	0.0760633	Zyx/Icam1/Abl2/Rnd1/Cdc42ep2/Nuak2/Tnf/Casp4/Ptpn1/Hip1/Srf/Plekhg2/Actg1/Il1a/Cx3cl1/Myo1c/Sh2b2/Gpr65/Epb41l4b/Cdc42ep3/Id1/Trpv4/Ccr7/Shank1/Cnn2/Rhof/Coro2b/Myom1/Cnn3	29
GO:0019915	lipid storage	6/479	50/11002	0.0207057	0.0207057	0.0760641	Il1b/Nfkbia/Tnf/Zc3h12a/Ttc39b/Apob	6
GO:0042310	vasoconstriction	6/479	50/11002	0.0207057	0.0207057	0.0760641	Ptgs2/Dusp5/Icam1/Comp/Cx3cl1/Adm	6
GO:0042102	positive regulation of T cell proliferation	7/479	64/11002	0.0207108	0.0207108	0.0760641	Il1b/Slamf1/Jak3/Traf6/Ccr7/Tfrc/Il6	7
GO:0043507	positive regulation of JUN kinase activity	7/479	64/11002	0.0207108	0.0207108	0.0760641	Il1b/Tnf/Ptpn1/Tirap/Ripk1/Traf6/Ccr7	7
GO:0032352	positive regulation of hormone metabolic process	3/479	14/11002	0.0208561	0.0208561	0.0760641	Il1b/Egr1/Tnf	3
GO:0060045	positive regulation of cardiac muscle cell proliferation	3/479	14/11002	0.0208561	0.0208561	0.0760641	Pim1/Notch1/Rbpj	3
GO:0070262	peptidyl-serine dephosphorylation	3/479	14/11002	0.0208561	0.0208561	0.0760641	Dusp1/Ppp1r15b/Ppp1r15a	3
GO:0070935	3'-UTR-mediated mRNA stabilization	3/479	14/11002	0.0208561	0.0208561	0.0760641	Zfp36/Myd88/Tirap	3
GO:0071605	monocyte chemotactic protein-1 production	3/479	14/11002	0.0208561	0.0208561	0.0760641	Il1b/Il1a/Trpv4	3
GO:0071637	regulation of monocyte chemotactic protein-1 production	3/479	14/11002	0.0208561	0.0208561	0.0760641	Il1b/Il1a/Trpv4	3
GO:0090069	regulation of ribosome biogenesis	3/479	14/11002	0.0208561	0.0208561	0.0760641	Heatr1/Usp36/Wdr43	3
GO:0097164	ammonium ion metabolic process	3/479	14/11002	0.0208561	0.0208561	0.0760641	Gch1/Chka/Atp2b2	3
GO:0033135	regulation of peptidyl-serine phosphorylation	9/479	94/11002	0.0209764	0.0209764	0.0760701	Ptgs2/Osm/Tnf/Hsp90aa1/Ppp1r15a/Paqr3/Inpp5j/Il6/Sptbn4	9
GO:0106106	cold-induced thermogenesis	9/479	94/11002	0.0209764	0.0209764	0.0760701	Kdm6b/Gadd45g/Il4ra/Notch1/Atf4/Cebpb/Rbpj/Ucp2/Id1	9
GO:0120161	regulation of cold-induced thermogenesis	9/479	94/11002	0.0209764	0.0209764	0.0760701	Kdm6b/Gadd45g/Il4ra/Notch1/Atf4/Cebpb/Rbpj/Ucp2/Id1	9
GO:0035690	cellular response to drug	18/479	245/11002	0.0209985	0.0209985	0.0760701	Il1b/Kdm6b/Egr1/Sphk1/Atf4/Tnf/Myc/Rela/Ripk1/Zc3h12a/Serpine1/Tfrc/Il6/Prnp/Adcy5/Ryr2/Rnf112/Nsg2	18
GO:2001235	positive regulation of apoptotic signaling pathway	12/479	142/11002	0.0210411	0.0210411	0.0760701	Plaur/Osm/Mcl1/Fas/Skil/Myc/Jak3/Ripk1/Eef1e1/Tnfrsf12a/Adora2a/Lck	12
GO:0002009	morphogenesis of an epithelium	21/479	299/11002	0.021062	0.021062	0.0760701	Socs3/Runx1/Notch1/Abl2/Tgm2/B4galt1/Tnf/Klf4/Rbpj/Myc/Srf/Sema4c/Gna13/Prkx/Lbx1/Traf6/Plet1/Il6/Ryr2/Adm/Dll4	21
GO:0010976	positive regulation of neuron projection development	19/479	263/11002	0.021128	0.021128	0.0760701	Sphk1/Abl2/Skil/Adamts1/Srf/Mapk6/Cx3cl1/Sez6/Ndel1/Tnfrsf12a/Shank1/Syt2/Il6/Rims2/Sema7a/Kalrn/Syt1/Lrp8/Ptprd	19
GO:0003143	embryonic heart tube morphogenesis	5/479	37/11002	0.0211471	0.0211471	0.0760701	Notch1/Rbpj/Srf/Lbx1/Ryr2	5
GO:0060612	adipose tissue development	5/479	37/11002	0.0211471	0.0211471	0.0760701	Id2/Xbp1/Sptlc2/Slc25a25/Klf7	5
GO:0071868	cellular response to monoamine stimulus	5/479	37/11002	0.0211471	0.0211471	0.0760701	Atf4/Aplp1/Adcy5/Ryr2/Nsg2	5
GO:0071870	cellular response to catecholamine stimulus	5/479	37/11002	0.0211471	0.0211471	0.0760701	Atf4/Aplp1/Adcy5/Ryr2/Nsg2	5
GO:1902653	secondary alcohol biosynthetic process	5/479	37/11002	0.0211471	0.0211471	0.0760701	Insig1/Hmgcr/Pmvk/Apob/Cyp51	5
GO:0007188	adenylate cyclase-modulating G protein-coupled receptor signaling pathway	8/479	79/11002	0.0212378	0.0212378	0.0761361	Gpr65/Gna13/Aplp1/Grm4/Insl3/Adora2a/Adcy5/Adm	8
GO:0106027	neuron projection organization	8/479	79/11002	0.0212378	0.0212378	0.0761361	Abl2/Homer1/Grin1/Shank1/Kalrn/Map1a/Prnp/Lrp8	8
GO:1901222	regulation of NIK/NF-kappaB signaling	8/479	79/11002	0.0212378	0.0212378	0.0761361	Il1b/Sphk1/Tnf/Litaf/Tirap/Rela/Zc3h12a/Traf6	8
GO:0002757	immune response-activating signal transduction	11/479	126/11002	0.021407	0.021407	0.0765687	C5ar1/Nfkbiz/Rela/Rabgef1/Zc3h12a/Sh2b2/Traf6/Nfkbid/Ccr7/Prnp/Lck	11
GO:0043491	protein kinase B signaling	11/479	126/11002	0.021407	0.021407	0.0765687	Il1b/Gcnt2/Osm/F3/Tnf/Klf4/Tcf7l2/Cx3cl1/Hsp90aa1/Il6/Tyro3	11
GO:0031667	response to nutrient levels	17/479	228/11002	0.0215376	0.0215376	0.0769485	Pim1/Zfp36/Il1b/Jun/Slc2a1/Klf10/Nuak2/Atf4/Fas/Srf/Xbp1/Tcf7l2/Zc3h12a/Grin1/Slc25a25/Cdkn2d/Trpv4	17
GO:0007595	lactation	4/479	25/11002	0.0217025	0.0217025	0.0770141	Socs2/Xbp1/Atp2b2/Kalrn	4
GO:0017158	regulation of calcium ion-dependent exocytosis	4/479	25/11002	0.0217025	0.0217025	0.0770141	Notch1/Syt2/Trim9/Syt1	4
GO:0035272	exocrine system development	4/479	25/11002	0.0217025	0.0217025	0.0770141	Tgm2/Tnf/Xbp1/Il6	4
GO:0045746	negative regulation of Notch signaling pathway	4/479	25/11002	0.0217025	0.0217025	0.0770141	Nfkbia/Lfng/Kctd10/Dll4	4
GO:0061337	cardiac conduction	4/479	25/11002	0.0217025	0.0217025	0.0770141	Scn2b/Cacna2d1/Ryr2/Sptbn4	4
GO:1902667	regulation of axon guidance	4/479	25/11002	0.0217025	0.0217025	0.0770141	Sema6b/Sema4c/Zswim4/Sema7a	4
GO:0007623	circadian rhythm	12/479	143/11002	0.0220996	0.0220996	0.0783352	Id2/Egr1/Klf10/Siah2/Atf4/Fas/Mat2a/Crem/Per1/Id1/Adora2a/Il6	12
GO:0010466	negative regulation of peptidase activity	9/479	95/11002	0.0223143	0.0223143	0.0789192	Ptgs2/Plaur/Siah2/Klf4/Nr4a1/Serpine1/Cdkn2d/Adora2a/Il6	9
GO:0010675	regulation of cellular carbohydrate metabolic process	9/479	95/11002	0.0223143	0.0223143	0.0789192	Ier3/Ppp1r3b/Midn/Stat3/Irs2/Ppp1r3d/Tcf7l2/P2ry6/Il6	9
GO:0032611	interleukin-1 beta production	7/479	65/11002	0.0223723	0.0223723	0.0790354	Il1b/Egr1/Sphk1/Casp4/Zc3h12a/Errfi1/Ccr7	7
GO:0002028	regulation of sodium ion transport	6/479	51/11002	0.0226339	0.0226339	0.0795123	Per1/Cxcl1/Scn2b/Wnk2/Nedd4/Sptbn4	6
GO:0007189	adenylate cyclase-activating G protein-coupled receptor signaling pathway	6/479	51/11002	0.0226339	0.0226339	0.0795123	Gpr65/Gna13/Aplp1/Adora2a/Adcy5/Adm	6
GO:0045445	myoblast differentiation	6/479	51/11002	0.0226339	0.0226339	0.0795123	Notch1/Tnf/Rbpj/Btg1/Srf/Tcf7l2	6
GO:0070059	intrinsic apoptotic signaling pathway in response to endoplasmic reticulum stress	6/479	51/11002	0.0226339	0.0226339	0.0795123	Atf4/Casp4/Cebpb/Ptpn1/Xbp1/Bcl2l1	6
GO:0019827	stem cell population maintenance	10/479	111/11002	0.0226796	0.0226796	0.0795123	Klf10/Stat3/Klf4/Rbpj/Tcf7l2/Ddx6/Tead3/Jmjd1c/Med21/Gnl3	10
GO:0042129	regulation of T cell proliferation	10/479	111/11002	0.0226796	0.0226796	0.0795123	Il1b/Irf1/Slamf1/Cebpb/Jak3/Traf6/Ccr7/Tfrc/Il6/Prnp	10
GO:0050852	T cell receptor signaling pathway	8/479	80/11002	0.0227341	0.0227341	0.0795123	Nfkbiz/Rela/Zc3h12a/Traf6/Nfkbid/Ccr7/Prnp/Lck	8
GO:0050954	sensory perception of mechanical stimulus	8/479	80/11002	0.0227341	0.0227341	0.0795123	Icam1/Tnf/Myc/Slc1a3/Cdkn2d/Atp2b2/Map1a/Sptbn4	8
GO:1902414	protein localization to cell junction	8/479	80/11002	0.0227341	0.0227341	0.0795123	Homer1/Grin2c/Grin1/Gripap1/Nptx1/Shank1/Kalrn/Map1a	8
GO:0019229	regulation of vasoconstriction	5/479	38/11002	0.023508	0.023508	0.0817657	Ptgs2/Dusp5/Icam1/Cx3cl1/Adm	5
GO:0048644	muscle organ morphogenesis	5/479	38/11002	0.023508	0.023508	0.0817657	Notch1/Rbpj/Myom1/Ryr2/Dll4	5
GO:0071867	response to monoamine	5/479	38/11002	0.023508	0.023508	0.0817657	Atf4/Aplp1/Adcy5/Ryr2/Nsg2	5
GO:0071869	response to catecholamine	5/479	38/11002	0.023508	0.023508	0.0817657	Atf4/Aplp1/Adcy5/Ryr2/Nsg2	5
GO:1904427	positive regulation of calcium ion transmembrane transport	5/479	38/11002	0.023508	0.023508	0.0817657	Cx3cl1/P2ry6/Hspa2/Cacna2d1/Ryr2	5
GO:0032652	regulation of interleukin-1 production	7/479	66/11002	0.0241237	0.0241237	0.0838149	Egr1/Sphk1/Casp4/Zc3h12a/Cx3cl1/Errfi1/Ccr7	7
GO:0001936	regulation of endothelial cell proliferation	8/479	81/11002	0.0243031	0.0243031	0.0843453	Jun/Stat3/F3/Tnf/Nr4a1/Lrg1/Vash1/Dll4	8
GO:0008202	steroid metabolic process	13/479	162/11002	0.0245489	0.0245489	0.0851048	Il1b/Egr1/Tnf/Insig1/Hmgcr/Il1a/Tiparp/Ttc39b/Pmvk/Apob/Soat2/Cyp51/Adm	13
GO:0006939	smooth muscle contraction	6/479	52/11002	0.0246794	0.0246794	0.0854632	Ptgs2/Sphk1/Srf/Comp/Ncf1/Lck	6
GO:0021680	cerebellar Purkinje cell layer development	4/479	26/11002	0.0247908	0.0247908	0.0855672	Sez6/Atp2b2/Sptbn2/Sez6l2	4
GO:0097009	energy homeostasis	4/479	26/11002	0.0247908	0.0247908	0.0855672	Stat3/Mex3c/Trpv4/Metrnl	4
GO:2000648	positive regulation of stem cell proliferation	4/479	26/11002	0.0247908	0.0247908	0.0855672	Notch1/Cx3cl1/Cxcl1/Taf4b	4
GO:0050808	synapse organization	20/479	286/11002	0.0249787	0.0249787	0.0860053	C5ar1/Abl2/Srgn/Tnf/Homer1/Sez6/Grin1/Gripap1/Nptx1/Shank1/Atp2b2/Kalrn/Prnp/Sptbn2/Nedd4/Sez6l2/Lrp8/Ptprd/Pcdhgc3/Tpbg	20
GO:0030073	insulin secretion	11/479	129/11002	0.0249883	0.0249883	0.0860053	Il1b/Midn/Tnf/Irs2/Hmgcr/Tcf7l2/Pim3/Ucp2/Klf7/Rims2/Adcy5	11
GO:0060401	cytosolic calcium ion transport	9/479	97/11002	0.0251718	0.0251718	0.0860053	Cx3cl1/Grin2c/P2ry6/Grin1/Plch2/Prnp/Cacna2d1/Ryr2/Lck	9
GO:0002438	acute inflammatory response to antigenic stimulus	3/479	15/11002	0.0252449	0.0252449	0.0860053	Icam1/Fcgr3/Ccr7	3
GO:0014912	negative regulation of smooth muscle cell migration	3/479	15/11002	0.0252449	0.0252449	0.0860053	Rbpj/Trib1/Serpine1	3
GO:0035025	positive regulation of Rho protein signal transduction	3/479	15/11002	0.0252449	0.0252449	0.0860053	Gpr65/Mcf2l/Lpar2	3
GO:0045076	regulation of interleukin-2 biosynthetic process	3/479	15/11002	0.0252449	0.0252449	0.0860053	Zfp36/Il1b/Il1a	3
GO:0045649	regulation of macrophage differentiation	3/479	15/11002	0.0252449	0.0252449	0.0860053	Id2/Trib1/Ripk1	3
GO:0060445	branching involved in salivary gland morphogenesis	3/479	15/11002	0.0252449	0.0252449	0.0860053	Tgm2/Tnf/Il6	3
GO:0060716	labyrinthine layer blood vessel development	3/479	15/11002	0.0252449	0.0252449	0.0860053	Junb/Rbpj/Vash1	3
GO:1902932	positive regulation of alcohol biosynthetic process	3/479	15/11002	0.0252449	0.0252449	0.0860053	Il1b/Tnf/P2ry6	3
GO:2000352	negative regulation of endothelial cell apoptotic process	3/479	15/11002	0.0252449	0.0252449	0.0860053	Icam1/Abl2/Serpine1	3
GO:0033674	positive regulation of kinase activity	23/479	342/11002	0.0255667	0.0255667	0.0870076	Pim1/Il1b/Gadd45g/Egr1/Map3k8/Nab2/Map2k3/Tnf/Ptpn1/Gadd45b/Tirap/Ripk1/Gadd45a/Hsp90aa1/Ccnd2/Ncf1/Traf6/Grm4/Ccr7/Map3k6/Prnp/Lrp8/Lpar2	23
GO:0043124	negative regulation of I-kappaB kinase/NF-kappaB signaling	5/479	39/11002	0.0260325	0.0260325	0.0882124	Ripk1/Zc3h12a/Per1/Nlrx1/Nfkbid	5
GO:0043470	regulation of carbohydrate catabolic process	5/479	39/11002	0.0260325	0.0260325	0.0882124	Ier3/Ppp1r3b/Stat3/Myc/Ppp1r3d	5
GO:1903524	positive regulation of blood circulation	5/479	39/11002	0.0260325	0.0260325	0.0882124	Ptgs2/Icam1/Gch1/Ryr2/Adm	5
GO:1903573	negative regulation of response to endoplasmic reticulum stress	5/479	39/11002	0.0260325	0.0260325	0.0882124	Ppp1r15b/Ptpn1/Xbp1/Bcl2l1/Ppp1r15a	5
GO:0042113	B cell activation	14/479	181/11002	0.0266202	0.0266202	0.0900104	Id2/Bcl3/Lfng/Ticam1/Fas/Rbpj/Irs2/Irf2bp2/Tirap/Jak3/Xbp1/Tfrc/Il6/Cxcr5	14
GO:1904062	regulation of cation transmembrane transport	14/479	181/11002	0.0266202	0.0266202	0.0900104	Rrad/Gem/Homer1/Cx3cl1/P2ry6/Hspa2/Shank1/Scn2b/Prnp/Wnk2/Nedd4/Cacna2d1/Ryr2/Mapk8ip2	14
GO:0016202	regulation of striated muscle tissue development	9/479	98/11002	0.0266938	0.0266938	0.0900661	Pim1/Notch1/Rbpj/Hmgcr/Ripk1/Tcf7l2/Flot1/Mapk11/S100b	9
GO:0098693	regulation of synaptic vesicle cycle	9/479	98/11002	0.0266938	0.0266938	0.0900661	Bcl2l1/Gripap1/Grm4/Adora2a/Syt2/Syp/Rims2/Syt1/Grik5	9
GO:0098727	maintenance of cell number	10/479	114/11002	0.0267224	0.0267224	0.0900662	Klf10/Stat3/Klf4/Rbpj/Tcf7l2/Ddx6/Tead3/Jmjd1c/Med21/Gnl3	10
GO:0030101	natural killer cell activation	6/479	53/11002	0.0268447	0.0268447	0.0903821	Id2/Ticam1/Irf1/Slamf1/H60b/Tyro3	6
GO:0030879	mammary gland development	8/479	83/11002	0.0276657	0.0276657	0.093047	Id2/B4galt1/Cebpb/Socs2/Irs2/Xbp1/Atp2b2/Kalrn	8
GO:0003206	cardiac chamber morphogenesis	7/479	68/11002	0.0279045	0.0279045	0.0936504	Id2/Notch1/Rbpj/Adamts1/Srf/Ryr2/Dll4	7
GO:0006937	regulation of muscle contraction	7/479	68/11002	0.0279045	0.0279045	0.0936504	Ptgs2/Sphk1/Srf/Zc3h12a/Ncf1/Ryr2/Lck	7
GO:0031348	negative regulation of defense response	12/479	148/11002	0.0279905	0.0279905	0.093839	Socs3/Zfp36/Ier3/Rabgef1/Zc3h12a/Cx3cl1/Siglece/Nlrx1/Adora2a/Ctla2a/Metrnl/Tyro3	12
GO:0090049	regulation of cell migration involved in sprouting angiogenesis	4/479	27/11002	0.0281309	0.0281309	0.0941097	Ptgs2/Notch1/Klf4/Dll4	4
GO:0097028	dendritic cell differentiation	4/479	27/11002	0.0281309	0.0281309	0.0941097	Cebpb/Rbpj/Traf6/Ccr7	4
GO:0009749	response to glucose	10/479	115/11002	0.0281777	0.0281777	0.0941665	Egr1/Icam1/Irs2/Hmgcr/Xbp1/Tcf7l2/Pim3/Ucp2/Klf7/Adcy5	10
GO:0043954	cellular component maintenance	5/479	40/11002	0.028724	0.028724	0.0956881	Abl2/Homer1/Wdhd1/Grin1/Prnp	5
GO:1903539	protein localization to postsynaptic membrane	5/479	40/11002	0.028724	0.028724	0.0956881	Grin2c/Grin1/Gripap1/Nptx1/Kalrn	5
GO:1903793	positive regulation of anion transport	5/479	40/11002	0.028724	0.028724	0.0956881	Il1b/Atf4/Cebpb/Il1a/Adora2a	5
GO:0002768	immune response-regulating cell surface receptor signaling pathway	11/479	132/11002	0.0289862	0.0289862	0.0964597	C5ar1/Nfkbiz/Rela/Rabgef1/Zc3h12a/Sh2b2/Traf6/Nfkbid/Ccr7/Prnp/Lck	11
GO:0001942	hair follicle development	6/479	54/11002	0.0291323	0.0291323	0.0967419	Ptgs2/Runx1/Notch1/Tnf/Rbpj/Rela	6
GO:0045685	regulation of glial cell differentiation	6/479	54/11002	0.0291323	0.0291323	0.0967419	Id2/Il1b/Notch1/Rela/Tcf7l2/Rnf112	6
GO:0007187	G protein-coupled receptor signaling pathway, coupled to cyclic nucleotide second messenger	8/479	84/11002	0.0294623	0.0294623	0.097159	Gpr65/Gna13/Aplp1/Grm4/Insl3/Adora2a/Adcy5/Adm	8
GO:0071887	leukocyte apoptotic process	8/479	84/11002	0.0294623	0.0294623	0.097159	Fas/Myc/Irs2/Jak3/Ripk1/Nfkbid/Ccr7/Il6	8
GO:0007015	actin filament organization	19/479	273/11002	0.0296351	0.0296351	0.097159	Zyx/Icam1/Abl2/Rnd1/Cdc42ep2/Casp4/Hip1/Srf/Plekhg2/Cx3cl1/Myo1c/Gpr65/Cdc42ep3/Id1/Trpv4/Shank1/Rhof/Coro2b/Myom1	19
GO:0097237	cellular response to toxic substance	10/479	116/11002	0.0296885	0.0296885	0.097159	Kdm6b/Egr1/Sphk1/Tnf/Rela/Ripk1/Zc3h12a/Gch1/Il6/Rnf112	10
GO:0045666	positive regulation of neuron differentiation	21/479	310/11002	0.0298169	0.0298169	0.097159	Sphk1/Abl2/Skil/Socs2/Adamts1/Srf/Mapk6/Cx3cl1/Sez6/Ndel1/Tnfrsf12a/Shank1/Syt2/Il6/Rims2/Sema7a/Kalrn/Rnf112/Syt1/Lrp8/Ptprd	21
GO:0051896	regulation of protein kinase B signaling	9/479	100/11002	0.0299306	0.0299306	0.097159	Gcnt2/Osm/F3/Tnf/Klf4/Tcf7l2/Cx3cl1/Hsp90aa1/Il6	9
GO:1901861	regulation of muscle tissue development	9/479	100/11002	0.0299306	0.0299306	0.097159	Pim1/Notch1/Rbpj/Hmgcr/Ripk1/Tcf7l2/Flot1/Mapk11/S100b	9
GO:0007605	sensory perception of sound	7/479	69/11002	0.0299376	0.0299376	0.097159	Icam1/Myc/Slc1a3/Cdkn2d/Atp2b2/Map1a/Sptbn4	7
GO:0006817	phosphate ion transport	3/479	16/11002	0.0300895	0.0300895	0.097159	Atf4/Cebpb/Slc20a1	3
GO:0031640	killing of cells of other organism	3/479	16/11002	0.0300895	0.0300895	0.097159	Ncf1/Trem1/Cxcl1	3
GO:0032689	negative regulation of interferon-gamma production	3/479	16/11002	0.0300895	0.0300895	0.097159	Slamf1/Zc3h12a/Prnp	3
GO:0032891	negative regulation of organic acid transport	3/479	16/11002	0.0300895	0.0300895	0.097159	Il1b/Tnf/Irs2	3
GO:0034138	toll-like receptor 3 signaling pathway	3/479	16/11002	0.0300895	0.0300895	0.097159	Tnf/Tirap/Flot1	3
GO:0034312	diol biosynthetic process	3/479	16/11002	0.0300895	0.0300895	0.097159	Sphk1/Sptlc2/Gch1	3
GO:0042094	interleukin-2 biosynthetic process	3/479	16/11002	0.0300895	0.0300895	0.097159	Zfp36/Il1b/Il1a	3
GO:0045061	thymic T cell selection	3/479	16/11002	0.0300895	0.0300895	0.097159	Fas/Srf/Ccr7	3
GO:0045742	positive regulation of epidermal growth factor receptor signaling pathway	3/479	16/11002	0.0300895	0.0300895	0.097159	Plaur/Hip1/Ncf1	3
GO:0048268	clathrin coat assembly	3/479	16/11002	0.0300895	0.0300895	0.097159	Hip1/Cltb/Nsg2	3
GO:0048730	epidermis morphogenesis	3/479	16/11002	0.0300895	0.0300895	0.097159	Runx1/Notch1/Klf4	3
GO:0048820	hair follicle maturation	3/479	16/11002	0.0300895	0.0300895	0.097159	Ptgs2/Notch1/Rbpj	3
GO:0050891	multicellular organismal water homeostasis	3/479	16/11002	0.0300895	0.0300895	0.097159	Ugcg/Srf/Trpv4	3
GO:0050974	detection of mechanical stimulus involved in sensory perception	3/479	16/11002	0.0300895	0.0300895	0.097159	Tnf/Myc/Atp2b2	3
GO:0060416	response to growth hormone	3/479	16/11002	0.0300895	0.0300895	0.097159	Stat3/Irf1/Socs2	3
GO:0071498	cellular response to fluid shear stress	3/479	16/11002	0.0300895	0.0300895	0.097159	Ptgs2/Klf4/Xbp1	3
GO:0150077	regulation of neuroinflammatory response	3/479	16/11002	0.0300895	0.0300895	0.097159	Ptgs2/Sphk1/Cx3cl1	3
GO:1900409	positive regulation of cellular response to oxidative stress	3/479	16/11002	0.0300895	0.0300895	0.097159	Mcl1/Tnf/Ripk1	3
GO:1901223	negative regulation of NIK/NF-kappaB signaling	3/479	16/11002	0.0300895	0.0300895	0.097159	Litaf/Rela/Zc3h12a	3
GO:0006820	anion transport	20/479	293/11002	0.0312136	0.0312136	0.100087	Il1b/Slc2a3/Slc2a1/Atf4/Tnf/Cebpb/Slc12a7/Myc/Irs2/Il1a/Slc7a6/Ripk1/Slc10a6/Slc1a3/P2ry6/Gabrd/Slc20a1/Adora2a/Prnp/Slc6a17	20
GO:0009746	response to hexose	10/479	117/11002	0.0312559	0.0312559	0.100087	Egr1/Icam1/Irs2/Hmgcr/Xbp1/Tcf7l2/Pim3/Ucp2/Klf7/Adcy5	10
GO:0034284	response to monosaccharide	10/479	117/11002	0.0312559	0.0312559	0.100087	Egr1/Icam1/Irs2/Hmgcr/Xbp1/Tcf7l2/Pim3/Ucp2/Klf7/Adcy5	10
GO:0051017	actin filament bundle assembly	10/479	117/11002	0.0312559	0.0312559	0.100087	Zyx/Abl2/Rnd1/Srf/Cx3cl1/Gpr65/Id1/Shank1/Rhof/Coro2b	10
GO:0002456	T cell mediated immunity	8/479	85/11002	0.0313377	0.0313377	0.100087	Arid5a/Il1b/Pvr/Icam1/Slamf1/Traf6/H60b/Il6	8
GO:0050921	positive regulation of chemotaxis	8/479	85/11002	0.0313377	0.0313377	0.100087	C5ar1/Il1b/Slamf1/Tirap/Cx3cl1/Serpine1/Trpv4/Ccr7	8
GO:0022404	molting cycle process	6/479	55/11002	0.0315444	0.0315444	0.100087	Ptgs2/Runx1/Notch1/Tnf/Rbpj/Rela	6
GO:0022405	hair cycle process	6/479	55/11002	0.0315444	0.0315444	0.100087	Ptgs2/Runx1/Notch1/Tnf/Rbpj/Rela	6
GO:0035773	insulin secretion involved in cellular response to glucose stimulus	6/479	55/11002	0.0315444	0.0315444	0.100087	Hmgcr/Tcf7l2/Pim3/Ucp2/Klf7/Adcy5	6
GO:0036465	synaptic vesicle recycling	6/479	55/11002	0.0315444	0.0315444	0.100087	Actg1/Bcl2l1/Gripap1/Syt2/Syp/Syt1	6
GO:0050830	defense response to Gram-positive bacterium	6/479	55/11002	0.0315444	0.0315444	0.100087	C5ar1/Myd88/Tnf/Tirap/Gbp7/Ncf1	6
GO:0098773	skin epidermis development	6/479	55/11002	0.0315444	0.0315444	0.100087	Ptgs2/Runx1/Notch1/Tnf/Rbpj/Rela	6
GO:1905954	positive regulation of lipid localization	6/479	55/11002	0.0315444	0.0315444	0.100087	Il1b/Runx1/Nfkbia/Il1a/Zc3h12a/Apob	6
GO:0000768	syncytium formation by plasma membrane fusion	5/479	41/11002	0.0315852	0.0315852	0.100087	Sbno2/Il4ra/Flot1/Fer1l5/Ocstamp	5
GO:0006029	proteoglycan metabolic process	5/479	41/11002	0.0315852	0.0315852	0.100087	Chsy1/Hs3st3b1/Chst7/Tcf7l2/Hs3st3a1	5
GO:0006821	chloride transport	5/479	41/11002	0.0315852	0.0315852	0.100087	Slc12a7/Slc1a3/P2ry6/Gabrd/Prnp	5
GO:0016126	sterol biosynthetic process	5/479	41/11002	0.0315852	0.0315852	0.100087	Insig1/Hmgcr/Pmvk/Apob/Cyp51	5
GO:0140253	cell-cell fusion	5/479	41/11002	0.0315852	0.0315852	0.100087	Sbno2/Il4ra/Flot1/Fer1l5/Ocstamp	5
GO:0002931	response to ischemia	4/479	28/11002	0.0317258	0.0317258	0.100087	Egr1/Rcan1/Bcl2l1/Cx3cl1	4
GO:0006356	regulation of transcription by RNA polymerase I	4/479	28/11002	0.0317258	0.0317258	0.100087	Atf4/Heatr1/Ppp1r15a/Wdr43	4
GO:0010883	regulation of lipid storage	4/479	28/11002	0.0317258	0.0317258	0.100087	Nfkbia/Zc3h12a/Ttc39b/Apob	4
GO:0032350	regulation of hormone metabolic process	4/479	28/11002	0.0317258	0.0317258	0.100087	Il1b/Egr1/Tnf/Tcf7l2	4
GO:0055010	ventricular cardiac muscle tissue morphogenesis	4/479	28/11002	0.0317258	0.0317258	0.100087	Notch1/Rbpj/Ryr2/Dll4	4
GO:0048813	dendrite morphogenesis	11/479	134/11002	0.0318943	0.0318943	0.100517	Abl2/Grin1/Id1/Syne1/Shank1/Klf7/Kalrn/Nedd4/Lrp8/Mapk8ip2/Ptprd	11
GO:0002040	sprouting angiogenesis	7/479	70/11002	0.0320683	0.0320683	0.100965	Ptgs2/Notch1/Klf4/Nr4a1/Srf/Jak1/Dll4	7
GO:0010631	epithelial cell migration	14/479	186/11002	0.0325614	0.0325614	0.102211	Ptgs2/Jun/Notch1/Map2k3/Klf4/Nr4a1/Srf/Zc3h12a/Serpine1/Prkx/Epb41l4b/Vash1/Insl3/Dll4	14
GO:0090130	tissue migration	14/479	186/11002	0.0325614	0.0325614	0.102211	Ptgs2/Jun/Notch1/Map2k3/Klf4/Nr4a1/Srf/Zc3h12a/Serpine1/Prkx/Epb41l4b/Vash1/Insl3/Dll4	14
GO:0090132	epithelium migration	14/479	186/11002	0.0325614	0.0325614	0.102211	Ptgs2/Jun/Notch1/Map2k3/Klf4/Nr4a1/Srf/Zc3h12a/Serpine1/Prkx/Epb41l4b/Vash1/Insl3/Dll4	14
GO:0061572	actin filament bundle organization	10/479	118/11002	0.0328808	0.0328808	0.103112	Zyx/Abl2/Rnd1/Srf/Cx3cl1/Gpr65/Id1/Shank1/Rhof/Coro2b	10
GO:0034330	cell junction organization	27/479	427/11002	0.0329631	0.0329631	0.103267	C5ar1/Abl2/Srgn/Tnf/Srf/Homer1/Myo1c/Sez6/Flot1/Grin1/Vmp1/Gripap1/Nptx1/Trpv4/Shank1/Atp2b2/Kalrn/Prnp/Coro2b/Sptbn2/Nedd4/Sez6l2/Cntnap1/Lrp8/Ptprd/Pcdhgc3/Tpbg	27
GO:0002764	immune response-regulating signaling pathway	11/479	135/11002	0.0334236	0.0334236	0.104502	C5ar1/Nfkbiz/Rela/Rabgef1/Zc3h12a/Sh2b2/Traf6/Nfkbid/Ccr7/Prnp/Lck	11
GO:1990138	neuron projection extension	11/479	135/11002	0.0334236	0.0334236	0.104502	Sema6b/Srf/Sema4c/Hsp90aa1/Ndel1/Tnfrsf12a/Trim46/Syt2/Rims2/Sema7a/Syt1	11
GO:0051347	positive regulation of transferase activity	26/479	409/11002	0.0339709	0.0339709	0.106108	Pim1/Il1b/Gadd45g/Egr1/Map3k8/Nab2/Map2k3/Tnf/Klf4/Ptpn1/Myc/Gadd45b/Tirap/Trib1/Ripk1/Gadd45a/Hsp90aa1/Ccnd2/Ncf1/Traf6/Grm4/Ccr7/Map3k6/Prnp/Lrp8/Lpar2	26
GO:0006919	activation of cysteine-type endopeptidase activity involved in apoptotic process	6/479	56/11002	0.0340831	0.0340831	0.106143	F3/Tnf/Casp4/Myc/Hip1/Lck	6
GO:0043200	response to amino acid	6/479	56/11002	0.0340831	0.0340831	0.106143	Tnf/Cebpb/Xbp1/Bcl2l1/Slc1a3/Grin1	6
GO:1904035	regulation of epithelial cell apoptotic process	6/479	56/11002	0.0340831	0.0340831	0.106143	Zfp36/Icam1/Abl2/Tnf/Xbp1/Serpine1	6
GO:0097061	dendritic spine organization	7/479	71/11002	0.034298	0.034298	0.106707	Abl2/Homer1/Grin1/Shank1/Kalrn/Prnp/Lrp8	7
GO:0010812	negative regulation of cell-substrate adhesion	5/479	42/11002	0.0346186	0.0346186	0.107303	Gcnt2/Notch1/Serpine1/Plet1/Coro2b	5
GO:0046427	positive regulation of receptor signaling pathway via JAK-STAT	5/479	42/11002	0.0346186	0.0346186	0.107303	Osm/Notch1/Tnf/Il6/Lck	5
GO:0072091	regulation of stem cell proliferation	5/479	42/11002	0.0346186	0.0346186	0.107303	Pim1/Notch1/Cx3cl1/Cxcl1/Taf4b	5
GO:0051345	positive regulation of hydrolase activity	24/479	372/11002	0.0350285	0.0350285	0.107303	Icam1/Abl2/Stat3/F3/Tnf/Casp4/Fas/Ppp1r15b/Myc/Hip1/Cx3cl1/Tbc1d14/Gpr65/Gna13/Ndel1/Ppp1r15a/Grin1/Snx18/Hspa2/Ccr7/Rgs1/Kalrn/Mtcl1/Lck	24
GO:0009314	response to radiation	20/479	297/11002	0.0352642	0.0352642	0.107303	Id2/Junb/Bcl3/Egr1/Jun/Abl2/Myc/Hmgcr/Rela/Bcl2l1/Sde2/Jund/Slc1a3/Nabp1/Gadd45a/Per1/Ccnd2/Grin1/Cdkn2d/Rpain	20
GO:0030902	hindbrain development	9/479	103/11002	0.0352849	0.0352849	0.107303	C5ar1/Abl2/Sema4c/Egr2/Sez6/Grin1/Atp2b2/Sptbn2/Sez6l2	9
GO:0051101	regulation of DNA binding	8/479	87/11002	0.0353302	0.0353302	0.107303	Id2/Plaur/Jun/Klf4/Myc/Zfp593/Traf6/Id1	8
GO:0000303	response to superoxide	3/479	17/11002	0.0353863	0.0353863	0.107303	Tnf/Ucp2/Gch1	3
GO:0002313	mature B cell differentiation involved in immune response	3/479	17/11002	0.0353863	0.0353863	0.107303	Bcl3/Lfng/Xbp1	3
GO:0014823	response to activity	3/479	17/11002	0.0353863	0.0353863	0.107303	Slc25a25/Ryr2/Metrnl	3
GO:0019934	cGMP-mediated signaling	3/479	17/11002	0.0353863	0.0353863	0.107303	Cgas/Pde10a/Rundc3a	3
GO:0031664	regulation of lipopolysaccharide-mediated signaling pathway	3/479	17/11002	0.0353863	0.0353863	0.107303	Trib1/Cx3cl1/Traf6	3
GO:0045823	positive regulation of heart contraction	3/479	17/11002	0.0353863	0.0353863	0.107303	Gch1/Ryr2/Adm	3
GO:0046325	negative regulation of glucose import	3/479	17/11002	0.0353863	0.0353863	0.107303	Tnf/Myc/Sh2b2	3
GO:0048143	astrocyte activation	3/479	17/11002	0.0353863	0.0353863	0.107303	C5ar1/Il1b/Adora2a	3
GO:0048791	calcium ion-regulated exocytosis of neurotransmitter	3/479	17/11002	0.0353863	0.0353863	0.107303	Syt2/Rims2/Syt1	3
GO:0048841	regulation of axon extension involved in axon guidance	3/479	17/11002	0.0353863	0.0353863	0.107303	Sema6b/Sema4c/Sema7a	3
GO:0061081	positive regulation of myeloid leukocyte cytokine production involved in immune response	3/479	17/11002	0.0353863	0.0353863	0.107303	Ticam1/Ddx21/Sema7a	3
GO:0071359	cellular response to dsRNA	3/479	17/11002	0.0353863	0.0353863	0.107303	Cgas/Pde12/Flot1	3
GO:0097107	postsynaptic density assembly	3/479	17/11002	0.0353863	0.0353863	0.107303	Nptx1/Shank1/Ptprd	3
GO:1900101	regulation of endoplasmic reticulum unfolded protein response	3/479	17/11002	0.0353863	0.0353863	0.107303	Ptpn1/Xbp1/Atf6	3
GO:1901385	regulation of voltage-gated calcium channel activity	3/479	17/11002	0.0353863	0.0353863	0.107303	Rrad/Gem/Cacna2d1	3
GO:1902236	negative regulation of endoplasmic reticulum stress-induced intrinsic apoptotic signaling pathway	3/479	17/11002	0.0353863	0.0353863	0.107303	Ptpn1/Xbp1/Bcl2l1	3
GO:2000209	regulation of anoikis	3/479	17/11002	0.0353863	0.0353863	0.107303	Notch1/Mcl1/Bcl2l1	3
GO:2001169	regulation of ATP biosynthetic process	3/479	17/11002	0.0353863	0.0353863	0.107303	Stat3/Myc/Bcl2l1	3
GO:0048568	embryonic organ development	17/479	242/11002	0.0354712	0.0354712	0.107303	Socs3/Id2/Junb/Runx1/Notch1/Cebpb/Rbpj/Myc/Insig1/Srf/Tcf7l2/Lbx1/Vash1/Atp2b2/Ryr2/Rnf112/Adm	17
GO:0010677	negative regulation of cellular carbohydrate metabolic process	4/479	29/11002	0.0355779	0.0355779	0.107303	Ier3/Midn/Stat3/Il6	4
GO:0030517	negative regulation of axon extension	4/479	29/11002	0.0355779	0.0355779	0.107303	Sema6b/Sema4c/Trim46/Sema7a	4
GO:0042698	ovulation cycle	4/479	29/11002	0.0355779	0.0355779	0.107303	Egr1/Runx1/Adamts1/Tyro3	4
GO:0042832	defense response to protozoan	4/479	29/11002	0.0355779	0.0355779	0.107303	Bcl3/Il4ra/Gbp7/Il6	4
GO:0050906	detection of stimulus involved in sensory perception	4/479	29/11002	0.0355779	0.0355779	0.107303	Tnf/Myc/Atp2b2/Pkd1l3	4
GO:0098661	inorganic anion transmembrane transport	4/479	29/11002	0.0355779	0.0355779	0.107303	Slc12a7/Slc1a3/Slc20a1/Prnp	4
GO:0033157	regulation of intracellular protein transport	13/479	171/11002	0.0359561	0.0359561	0.10834	Ptgs2/Ptpn1/Insig1/Xbp1/Tcf7l2/Zc3h12a/Myo1c/Ndel1/Gripap1/Dnajc27/Prnp/Mtcl1/Pkia	13
GO:0008645	hexose transmembrane transport	7/479	72/11002	0.0366284	0.0366284	0.109946	Il1b/Slc2a3/Slc2a1/Tnf/Myc/Irs2/Sh2b2	7
GO:0010469	regulation of signaling receptor activity	7/479	72/11002	0.0366284	0.0366284	0.109946	Homer1/Serpine1/Ncf1/Errfi1/Nptx1/Shank1/Mapk8ip2	7
GO:0043506	regulation of JUN kinase activity	7/479	72/11002	0.0366284	0.0366284	0.109946	Il1b/Tnf/Ptpn1/Tirap/Ripk1/Traf6/Ccr7	7
GO:1904659	glucose transmembrane transport	7/479	72/11002	0.0366284	0.0366284	0.109946	Il1b/Slc2a3/Slc2a1/Tnf/Myc/Irs2/Sh2b2	7
GO:0032651	regulation of interleukin-1 beta production	6/479	57/11002	0.0367502	0.0367502	0.110102	Egr1/Sphk1/Casp4/Zc3h12a/Errfi1/Ccr7	6
GO:0051702	interaction with symbiont	6/479	57/11002	0.0367502	0.0367502	0.110102	Jun/Zc3h12a/Ncf1/Trem1/Chd1/Cxcl1	6
GO:0051235	maintenance of location	15/479	207/11002	0.0368372	0.0368372	0.110258	Il1b/Nfkbia/Srgn/Tnf/Insig1/Zc3h12a/Cx3cl1/Ttc39b/P2ry6/Apob/Syne1/Plch2/Ryr2/Lck/Grik5	15
GO:0071236	cellular response to antibiotic	9/479	104/11002	0.0372071	0.0372071	0.111259	Kdm6b/Egr1/Sphk1/Rela/Ripk1/Zc3h12a/Il6/Adcy5/Rnf112	9
GO:0006949	syncytium formation	5/479	43/11002	0.0378263	0.0378263	0.11226	Sbno2/Il4ra/Flot1/Fer1l5/Ocstamp	5
GO:0017156	calcium-ion regulated exocytosis	5/479	43/11002	0.0378263	0.0378263	0.11226	Notch1/Syt2/Trim9/Rims2/Syt1	5
GO:0030510	regulation of BMP signaling pathway	5/479	43/11002	0.0378263	0.0378263	0.11226	Notch1/Skil/Rbpj/Tcf7l2/Fbxl15	5
GO:0031102	neuron projection regeneration	5/479	43/11002	0.0378263	0.0378263	0.11226	Jun/Klf4/Fas/Ndel1/Adm	5
GO:0032720	negative regulation of tumor necrosis factor production	5/479	43/11002	0.0378263	0.0378263	0.11226	Bcl3/Slamf1/Zc3h12a/Cx3cl1/Errfi1	5
GO:0062237	protein localization to postsynapse	5/479	43/11002	0.0378263	0.0378263	0.11226	Grin2c/Grin1/Gripap1/Nptx1/Kalrn	5
GO:1990868	response to chemokine	5/479	43/11002	0.0378263	0.0378263	0.11226	Dusp1/Zc3h12a/Cx3cl1/Cxcl2/Cxcl1	5
GO:1990869	cellular response to chemokine	5/479	43/11002	0.0378263	0.0378263	0.11226	Dusp1/Zc3h12a/Cx3cl1/Cxcl2/Cxcl1	5
GO:0006109	regulation of carbohydrate metabolic process	10/479	121/11002	0.038109	0.038109	0.112992	Ier3/Ppp1r3b/Midn/Stat3/Myc/Irs2/Ppp1r3d/Tcf7l2/P2ry6/Il6	10
GO:0018108	peptidyl-tyrosine phosphorylation	15/479	208/11002	0.0381845	0.0381845	0.11311	Socs3/Osm/Icam1/Abl2/Tnf/Irf1/Ptpn1/Jak3/Ncf1/Errfi1/Jak1/Il6/Prnp/Lck/Lrp8	15
GO:0015749	monosaccharide transmembrane transport	7/479	73/11002	0.0390609	0.0390609	0.115489	Il1b/Slc2a3/Slc2a1/Tnf/Myc/Irs2/Sh2b2	7
GO:0038127	ERBB signaling pathway	7/479	73/11002	0.0390609	0.0390609	0.115489	Plaur/Abl2/Rbpj/Hip1/Ptpn12/Ncf1/Errfi1	7
GO:0001508	action potential	6/479	58/11002	0.0395475	0.0395475	0.115932	Tnf/Grik2/Scn2b/Cacna2d1/Ryr2/Cntnap1	6
GO:0006112	energy reserve metabolic process	6/479	58/11002	0.0395475	0.0395475	0.115932	Ppp1r3b/Irs2/Ppp1r3d/Tcf7l2/Pgm2/S100b	6
GO:0070227	lymphocyte apoptotic process	6/479	58/11002	0.0395475	0.0395475	0.115932	Fas/Myc/Irs2/Jak3/Ripk1/Nfkbid	6
GO:1901224	positive regulation of NIK/NF-kappaB signaling	6/479	58/11002	0.0395475	0.0395475	0.115932	Il1b/Sphk1/Tnf/Tirap/Rela/Traf6	6
GO:0035023	regulation of Rho protein signal transduction	8/479	89/11002	0.0396531	0.0396531	0.115932	Abl2/Plekhg2/Flot1/Gpr65/Kalrn/Kctd10/Mcf2l/Lpar2	8
GO:0071333	cellular response to glucose stimulus	8/479	89/11002	0.0396531	0.0396531	0.115932	Icam1/Hmgcr/Xbp1/Tcf7l2/Pim3/Ucp2/Klf7/Adcy5	8
GO:1903169	regulation of calcium ion transmembrane transport	8/479	89/11002	0.0396531	0.0396531	0.115932	Rrad/Gem/Cx3cl1/P2ry6/Hspa2/Prnp/Cacna2d1/Ryr2	8
GO:1905952	regulation of lipid localization	8/479	89/11002	0.0396531	0.0396531	0.115932	Il1b/Runx1/Nfkbia/Irs2/Il1a/Zc3h12a/Ttc39b/Apob	8
GO:0002823	negative regulation of adaptive immune response based on somatic recombination of immune receptors built from immunoglobulin superfamily domains	4/479	30/11002	0.0396884	0.0396884	0.115932	Il4ra/Slamf1/Jak3/Zc3h12a	4
GO:0007257	activation of JUN kinase activity	4/479	30/11002	0.0396884	0.0396884	0.115932	Ptpn1/Tirap/Ripk1/Ccr7	4
GO:0042531	positive regulation of tyrosine phosphorylation of STAT protein	4/479	30/11002	0.0396884	0.0396884	0.115932	Osm/Tnf/Il6/Lck	4
GO:1902930	regulation of alcohol biosynthetic process	4/479	30/11002	0.0396884	0.0396884	0.115932	Il1b/Tnf/P2ry6/Apob	4
GO:1904646	cellular response to amyloid-beta	4/479	30/11002	0.0396884	0.0396884	0.115932	Icam1/Casp4/Prnp/Cacna2d1	4
GO:0032386	regulation of intracellular transport	18/479	264/11002	0.0399322	0.0399322	0.116536	Ptgs2/Ier3/Il4ra/Ptpn1/Insig1/Xbp1/Tcf7l2/Rabgef1/Zc3h12a/Myo1c/Ndel1/Gripap1/Snx12/Trim46/Dnajc27/Prnp/Mtcl1/Pkia	18
GO:0048762	mesenchymal cell differentiation	10/479	122/11002	0.0399724	0.0399724	0.116546	Sema6b/Il1b/Gcnt2/Plaur/Notch1/Rbpj/Sema4c/Tcf7l2/Il6/Sema7a	10
GO:0048738	cardiac muscle tissue development	11/479	139/11002	0.0400603	0.0400603	0.116694	Pim1/Id2/Kdm6b/Notch1/Rbpj/Srf/Ripk1/Myom1/Mapk11/Ryr2/Dll4	11
GO:0000305	response to oxygen radical	3/479	18/11002	0.0411292	0.0411292	0.11802	Tnf/Ucp2/Gch1	3
GO:0007435	salivary gland morphogenesis	3/479	18/11002	0.0411292	0.0411292	0.11802	Tgm2/Tnf/Il6	3
GO:0009593	detection of chemical stimulus	3/479	18/11002	0.0411292	0.0411292	0.11802	Pkd1l3/Ryr2/Syt1	3
GO:0010893	positive regulation of steroid biosynthetic process	3/479	18/11002	0.0411292	0.0411292	0.11802	Il1b/Tnf/Il1a	3
GO:0015012	heparan sulfate proteoglycan biosynthetic process	3/479	18/11002	0.0411292	0.0411292	0.11802	Hs3st3b1/Tcf7l2/Hs3st3a1	3
GO:0030104	water homeostasis	3/479	18/11002	0.0411292	0.0411292	0.11802	Ugcg/Srf/Trpv4	3
GO:0032495	response to muramyl dipeptide	3/479	18/11002	0.0411292	0.0411292	0.11802	Nfkbia/Notch1/Rela	3
GO:0032770	positive regulation of monooxygenase activity	3/479	18/11002	0.0411292	0.0411292	0.11802	Il1b/Tnf/Gch1	3
GO:0034311	diol metabolic process	3/479	18/11002	0.0411292	0.0411292	0.11802	Sphk1/Sptlc2/Gch1	3
GO:0045616	regulation of keratinocyte differentiation	3/479	18/11002	0.0411292	0.0411292	0.11802	Zfp36/Notch1/Errfi1	3
GO:0051968	positive regulation of synaptic transmission, glutamatergic	3/479	18/11002	0.0411292	0.0411292	0.11802	Ptgs2/Shank1/Adora2a	3
GO:0060143	positive regulation of syncytium formation by plasma membrane fusion	3/479	18/11002	0.0411292	0.0411292	0.11802	Il4ra/Flot1/Ocstamp	3
GO:1902884	positive regulation of response to oxidative stress	3/479	18/11002	0.0411292	0.0411292	0.11802	Mcl1/Tnf/Ripk1	3
GO:1903671	negative regulation of sprouting angiogenesis	3/479	18/11002	0.0411292	0.0411292	0.11802	Notch1/Klf4/Dll4	3
GO:2000826	regulation of heart morphogenesis	3/479	18/11002	0.0411292	0.0411292	0.11802	Pim1/Notch1/Rbpj	3
GO:0032890	regulation of organic acid transport	5/479	44/11002	0.04121	0.04121	0.11802	Il1b/Tnf/Irs2/Il1a/Adora2a	5
GO:0044344	cellular response to fibroblast growth factor stimulus	5/479	44/11002	0.04121	0.04121	0.11802	Zfp36/Nr4a1/Tcf7l2/Dll4/Spry4	5
GO:1903556	negative regulation of tumor necrosis factor superfamily cytokine production	5/479	44/11002	0.04121	0.04121	0.11802	Bcl3/Slamf1/Zc3h12a/Cx3cl1/Errfi1	5
GO:0050777	negative regulation of immune response	9/479	106/11002	0.0412635	0.0412635	0.11802	Il4ra/Tnf/Irf1/Slamf1/Jak3/Rabgef1/Zc3h12a/Nlrx1/Tyro3	9
GO:0050851	antigen receptor-mediated signaling pathway	9/479	106/11002	0.0412635	0.0412635	0.11802	Nfkbiz/Rela/Zc3h12a/Sh2b2/Traf6/Nfkbid/Ccr7/Prnp/Lck	9
GO:0021782	glial cell development	7/479	74/11002	0.0415968	0.0415968	0.118757	Id2/C5ar1/Il1b/Tcf7l2/Adora2a/Lgi4/Cntnap1	7
GO:0034219	carbohydrate transmembrane transport	7/479	74/11002	0.0415968	0.0415968	0.118757	Il1b/Slc2a3/Slc2a1/Tnf/Myc/Irs2/Sh2b2	7
GO:0031099	regeneration	8/479	90/11002	0.0419414	0.0419414	0.119633	Jun/Klf4/Fas/Cebpb/Ninj1/Serpine1/Ndel1/Adm	8
GO:0046651	lymphocyte proliferation	14/479	193/11002	0.0424215	0.0424215	0.120725	Il1b/Myd88/Ticam1/Irf1/Slamf1/Cebpb/Irs2/Tirap/Jak3/Traf6/Ccr7/Tfrc/Il6/Prnp	14
GO:0018212	peptidyl-tyrosine modification	15/479	211/11002	0.042439	0.042439	0.120725	Socs3/Osm/Icam1/Abl2/Tnf/Irf1/Ptpn1/Jak3/Ncf1/Errfi1/Jak1/Il6/Prnp/Lck/Lrp8	15
GO:0060562	epithelial tube morphogenesis	15/479	211/11002	0.042439	0.042439	0.120725	Notch1/Abl2/B4galt1/Tnf/Rbpj/Myc/Srf/Sema4c/Gna13/Prkx/Lbx1/Traf6/Ryr2/Adm/Dll4	15
GO:0042593	glucose homeostasis	12/479	158/11002	0.0430516	0.0430516	0.122357	Icam1/Stat3/Hmgcr/Xbp1/Tcf7l2/Pim3/Ucp2/Sh2b2/Trpv4/Klf7/Il6/Adcy5	12
GO:0099173	postsynapse organization	11/479	141/11002	0.0437002	0.0437002	0.124042	Abl2/Srgn/Homer1/Grin1/Nptx1/Shank1/Kalrn/Prnp/Sptbn2/Lrp8/Ptprd	11
GO:0002253	activation of immune response	13/479	176/11002	0.0437231	0.0437231	0.124042	C5ar1/Il1b/Cgas/Nfkbiz/Rela/Rabgef1/Zc3h12a/Sh2b2/Traf6/Nfkbid/Ccr7/Prnp/Lck	13
GO:0002831	regulation of response to biotic stimulus	15/479	212/11002	0.0439293	0.0439293	0.12421	Il1b/Cgas/Pvr/Irf1/Polr3d/Tirap/Trib1/Zc3h12a/Cx3cl1/Traf6/Cxcl1/Nlrx1/H60b/Lrp8/Tyro3	15
GO:0000462	maturation of SSU-rRNA from tricistronic rRNA transcript (SSU-rRNA, 5.8S rRNA, LSU-rRNA)	4/479	31/11002	0.044058	0.044058	0.12421	Tsr1/Heatr1/Utp4/Kri1	4
GO:0005978	glycogen biosynthetic process	4/479	31/11002	0.044058	0.044058	0.12421	Ppp1r3b/Irs2/Ppp1r3d/Pgm2	4
GO:0009250	glucan biosynthetic process	4/479	31/11002	0.044058	0.044058	0.12421	Ppp1r3b/Irs2/Ppp1r3d/Pgm2	4
GO:0045668	negative regulation of osteoblast differentiation	4/479	31/11002	0.044058	0.044058	0.12421	Id2/Notch1/Tnf/Id1	4
GO:1904645	response to amyloid-beta	4/479	31/11002	0.044058	0.044058	0.12421	Icam1/Casp4/Prnp/Cacna2d1	4
GO:1904707	positive regulation of vascular smooth muscle cell proliferation	4/479	31/11002	0.044058	0.044058	0.12421	Jun/Tnf/Adamts1/P2ry6	4
GO:0002377	immunoglobulin production	8/479	91/11002	0.0443155	0.0443155	0.124491	Il4ra/Cgas/Tnf/Fas/Xbp1/Traf6/Tfrc/Il6	8
GO:0008637	apoptotic mitochondrial changes	8/479	91/11002	0.0443155	0.0443155	0.124491	Ier3/Plaur/Jun/Mcl1/Fas/Bcl2l1/Nptx1/Pim2	8
GO:0071326	cellular response to monosaccharide stimulus	8/479	91/11002	0.0443155	0.0443155	0.124491	Icam1/Hmgcr/Xbp1/Tcf7l2/Pim3/Ucp2/Klf7/Adcy5	8
GO:0071331	cellular response to hexose stimulus	8/479	91/11002	0.0443155	0.0443155	0.124491	Icam1/Hmgcr/Xbp1/Tcf7l2/Pim3/Ucp2/Klf7/Adcy5	8
GO:0006887	exocytosis	17/479	249/11002	0.0445099	0.0445099	0.124926	Il4ra/Notch1/Scamp1/Bcl2l1/Rabgef1/Grm4/Adora2a/Trim72/Syt2/Trim9/Syp/Rims2/Lgi3/Sptbn2/Syt1/Grik5/Erc1	17
GO:0002711	positive regulation of T cell mediated immunity	5/479	45/11002	0.0447711	0.0447711	0.125214	Arid5a/Il1b/Pvr/Traf6/Il6	5
GO:0048488	synaptic vesicle endocytosis	5/479	45/11002	0.0447711	0.0447711	0.125214	Actg1/Bcl2l1/Syt2/Syp/Syt1	5
GO:0140238	presynaptic endocytosis	5/479	45/11002	0.0447711	0.0447711	0.125214	Actg1/Bcl2l1/Syt2/Syp/Syt1	5
GO:1905517	macrophage migration	5/479	45/11002	0.0447711	0.0447711	0.125214	C5ar1/Slamf1/Cx3cl1/Trpv4/Ccr7	5
GO:0033500	carbohydrate homeostasis	12/479	159/11002	0.0448174	0.0448174	0.125232	Icam1/Stat3/Hmgcr/Xbp1/Tcf7l2/Pim3/Ucp2/Sh2b2/Trpv4/Klf7/Il6/Adcy5	12
GO:0008306	associative learning	6/479	60/11002	0.045538	0.045538	0.126993	Abl2/Srf/Hmgcr/Grin1/Shank1/Map1a	6
GO:0008584	male gonad development	6/479	60/11002	0.045538	0.045538	0.126993	Icam1/Bcl2l1/Il1a/H3f3b/Insl3/Jmjd1c	6
GO:0032943	mononuclear cell proliferation	14/479	195/11002	0.0455897	0.0455897	0.126993	Il1b/Myd88/Ticam1/Irf1/Slamf1/Cebpb/Irs2/Tirap/Jak3/Traf6/Ccr7/Tfrc/Il6/Prnp	14
GO:0009267	cellular response to starvation	9/479	108/11002	0.0456086	0.0456086	0.126993	Jun/Slc2a1/Klf10/Nuak2/Atf4/Fas/Xbp1/Tcf7l2/Zc3h12a	9
GO:0002706	regulation of lymphocyte mediated immunity	10/479	125/11002	0.0459359	0.0459359	0.127791	Arid5a/Il1b/Pvr/Tnf/Slamf1/Fcgr3/Traf6/Tfrc/H60b/Il6	10
GO:0009895	negative regulation of catabolic process	16/479	232/11002	0.0465656	0.0465656	0.129221	Zfp36/Ier3/Il1b/Myd88/Stat3/Mcl1/Tnf/Tirap/Hmgcr/Rela/Usp36/Tbc1d14/Grin2c/Snx12/Cyp51/Map1a	16
GO:0002698	negative regulation of immune effector process	8/479	92/11002	0.0467765	0.0467765	0.129221	Il4ra/Tnf/Irf1/Slamf1/Jak3/Rabgef1/Zc3h12a/Nlrx1	8
GO:0006986	response to unfolded protein	8/479	92/11002	0.0467765	0.0467765	0.129221	Atf4/Ptpn1/Xbp1/Comp/Hsp90aa1/Ppp1r15a/Hspa2/Atf6	8
GO:2000027	regulation of animal organ morphogenesis	8/479	92/11002	0.0467765	0.0467765	0.129221	Pim1/Notch1/Abl2/B4galt1/Tnf/Rbpj/Myc/Xbp1	8
GO:0001516	prostaglandin biosynthetic process	3/479	19/11002	0.04731	0.04731	0.129221	Ptgs2/Il1b/Sphk1	3
GO:0002053	positive regulation of mesenchymal cell proliferation	3/479	19/11002	0.04731	0.04731	0.129221	Myc/Irs2/Syne1	3
GO:0002063	chondrocyte development	3/479	19/11002	0.04731	0.04731	0.129221	Chsy1/Comp/Mex3c	3
GO:0002755	MyD88-dependent toll-like receptor signaling pathway	3/479	19/11002	0.04731	0.04731	0.129221	Myd88/Irf1/Cd300lf	3
GO:0002920	regulation of humoral immune response	3/479	19/11002	0.04731	0.04731	0.129221	Il1b/Tnf/Ccr7	3
GO:0003197	endocardial cushion development	3/479	19/11002	0.04731	0.04731	0.129221	Notch1/Rbpj/Nedd4	3
GO:0005979	regulation of glycogen biosynthetic process	3/479	19/11002	0.04731	0.04731	0.129221	Ppp1r3b/Irs2/Ppp1r3d	3
GO:0010962	regulation of glucan biosynthetic process	3/479	19/11002	0.04731	0.04731	0.129221	Ppp1r3b/Irs2/Ppp1r3d	3
GO:0031167	rRNA methylation	3/479	19/11002	0.04731	0.04731	0.129221	Nop2/Nsun4/Mrm3	3
GO:0043496	regulation of protein homodimerization activity	3/479	19/11002	0.04731	0.04731	0.129221	Ticam1/Tirap/Id1	3
GO:0045932	negative regulation of muscle contraction	3/479	19/11002	0.04731	0.04731	0.129221	Ptgs2/Zc3h12a/Ncf1	3
GO:0046457	prostanoid biosynthetic process	3/479	19/11002	0.04731	0.04731	0.129221	Ptgs2/Il1b/Sphk1	3
GO:0048846	axon extension involved in axon guidance	3/479	19/11002	0.04731	0.04731	0.129221	Sema6b/Sema4c/Sema7a	3
GO:0050765	negative regulation of phagocytosis	3/479	19/11002	0.04731	0.04731	0.129221	Cd300lf/Siglece/Cnn2	3
GO:0090314	positive regulation of protein targeting to membrane	3/479	19/11002	0.04731	0.04731	0.129221	Myo1c/Prnp/Mtcl1	3
GO:1902284	neuron projection extension involved in neuron projection guidance	3/479	19/11002	0.04731	0.04731	0.129221	Sema6b/Sema4c/Sema7a	3
GO:2000637	positive regulation of gene silencing by miRNA	3/479	19/11002	0.04731	0.04731	0.129221	Zfp36/Stat3/Ripk1	3
GO:0010977	negative regulation of neuron projection development	10/479	126/11002	0.0480504	0.0480504	0.131017	Sema6b/Rbpj/Sema4c/Sez6/Paqr3/Id1/Trpv4/Trim46/Inpp5j/Sema7a	10
GO:0042594	response to starvation	10/479	126/11002	0.0480504	0.0480504	0.131017	Zfp36/Jun/Slc2a1/Klf10/Nuak2/Atf4/Fas/Xbp1/Tcf7l2/Zc3h12a	10
GO:0014911	positive regulation of smooth muscle cell migration	5/479	46/11002	0.0485106	0.0485106	0.131163	Egr1/F3/Myc/Adamts1/P2ry6	5
GO:0031646	positive regulation of nervous system process	5/479	46/11002	0.0485106	0.0485106	0.131163	Grin1/Shank1/Il6/Rims2/S100b	5
GO:0042058	regulation of epidermal growth factor receptor signaling pathway	5/479	46/11002	0.0485106	0.0485106	0.131163	Plaur/Hip1/Ptpn12/Ncf1/Errfi1	5
GO:0001974	blood vessel remodeling	4/479	32/11002	0.0486862	0.0486862	0.131163	Tgm2/Rbpj/Tmbim1/Dll4	4
GO:0010596	negative regulation of endothelial cell migration	4/479	32/11002	0.0486862	0.0486862	0.131163	Notch1/Klf4/Vash1/Dll4	4
GO:0032728	positive regulation of interferon-beta production	4/479	32/11002	0.0486862	0.0486862	0.131163	Ticam1/Irf1/Polr3d/Flot1	4
GO:0043949	regulation of cAMP-mediated signaling	4/479	32/11002	0.0486862	0.0486862	0.131163	Cgas/Aplp1/Pde10a/Insl3	4
GO:0048512	circadian behavior	4/479	32/11002	0.0486862	0.0486862	0.131163	Id2/Egr1/Adora2a/Il6	4
GO:0050856	regulation of T cell receptor signaling pathway	4/479	32/11002	0.0486862	0.0486862	0.131163	Rela/Ccr7/Prnp/Lck	4
GO:0060964	regulation of gene silencing by miRNA	4/479	32/11002	0.0486862	0.0486862	0.131163	Zfp36/Stat3/Ripk1/Zc3h12a	4
GO:0061098	positive regulation of protein tyrosine kinase activity	4/479	32/11002	0.0486862	0.0486862	0.131163	Ptpn1/Ncf1/Prnp/Lrp8	4
GO:0098754	detoxification	4/479	32/11002	0.0486862	0.0486862	0.131163	Mt1/Mt2/Tnf/Gch1	4
GO:0099601	regulation of neurotransmitter receptor activity	4/479	32/11002	0.0486862	0.0486862	0.131163	Homer1/Nptx1/Shank1/Mapk8ip2	4
GO:1903580	positive regulation of ATP metabolic process	4/479	32/11002	0.0486862	0.0486862	0.131163	Stat3/Myc/Bend3/Bcl2l1	4
GO:0046546	development of primary male sexual characteristics	6/479	61/11002	0.0487336	0.0487336	0.131179	Icam1/Bcl2l1/Il1a/H3f3b/Insl3/Jmjd1c	6
GO:0005996	monosaccharide metabolic process	13/479	179/11002	0.04891	0.04891	0.131542	Ppp1r3b/Midn/B4galt1/Atf4/Tnf/Ldha/Myc/Irs2/Ppp1r3d/Tcf7l2/Pgm2/Il6/Pfkp	13
GO:0099175	regulation of postsynapse organization	8/479	93/11002	0.0493252	0.0493252	0.132545	Srgn/Homer1/Grin1/Nptx1/Kalrn/Prnp/Lrp8/Ptprd	8
GO:0031669	cellular response to nutrient levels	11/479	144/11002	0.0495766	0.0495766	0.133107	Pim1/Jun/Slc2a1/Klf10/Nuak2/Atf4/Fas/Srf/Xbp1/Tcf7l2/Zc3h12a	11
GO:0006906	vesicle fusion	7/479	77/11002	0.0498358	0.0498358	0.13369	Sphk1/Rab20/Slamf1/Syt2/Trim9/Syt1/Grik5	7

## Sheet: cluster 2
ID	Description	GeneRatio	BgRatio	pvalue	p.adjust	qvalue	geneID	Count
GO:0045087	innate immune response	71/490	433/11002	2.05196e-22	2.05196e-22	6.61162e-19	Ccl12/Cxcl16/Acod1/Tlr2/Cd244a/Treml2/Csf1/Gbp5/Ccl2/Gbp3/Ccl22/Nectin2/Cd14/Gbp2/Il12b/Trim30a/Ccl4/Ccl9/Rnf19b/Ccl5/Hck/Trex1/Tnfaip3/Stat2/Ifih1/Parp14/Ptpn2/Slamf7/Tlr8/Irgm1/Ulbp1/G3bp1/Mefv/Apobec3/Clec2d/Hexim1/Tlr1/Actr3/Ccl3/Alpk1/Eprs/Clec4d/Socs1/Lcn2/Nod2/Il18rap/Zc3hav1/Traf3/Optn/Plscr1/Clec4e/Ikbke/Mfhas1/Stx11/Irgm2/Ifnar1/Msrb1/Fpr2/Ccr1/Nlrp3/Nos2/Pik3r6/Ccl7/Malt1/Pspc1/Jak2/Ir…	71
GO:0009617	response to bacterium	59/490	368/11002	3.18807e-18	3.18807e-18	5.13615e-15	Ccl12/Cxcl16/Cxcl10/Slfn2/Acod1/Ptger4/Tlr2/Noct/Tnip2/Gbp5/Il1rn/Ccl2/Gbp3/Pde4b/Cd14/Gbp2/Tnip3/Il12b/Cd274/Trim30a/Ccl5/Hck/Mapkapk2/Adam9/Tnfaip8/Cxcl11/Tnfaip3/Slfn4/Saa3/Irgm1/Vgf/Tlr1/Paf1/Ncl/Alpk1/Fcgr2b/Clec4d/Serpina3f/Lcn2/Nod2/Adam17/Optn/Plscr1/Nfkb1/Clec4e/Cd86/Irgm2/Ifnar1/Nfkbib/Fpr2/Nlrp3/Nos2/Gas5/Ptafr/Malt1/Jak2/Irak3/Il27ra/Gbp2b	59
GO:0006954	inflammatory response	61/490	411/11002	3.89125e-17	3.89125e-17	4.17934e-14	Ccl12/Cxcl10/Acod1/Ptger4/Tlr2/Ldlr/Csf1/Tnip2/Ccrl2/Gbp5/Il1rn/Ccl2/Ccl22/Hgf/Relb/Cd14/Il12b/Ccl4/Ccl9/Ccl5/Hck/Trex1/Mapkapk2/Cxcl11/Tnfaip3/Ptpn2/Nampt/Nfe2l2/Tlr8/Saa3/Mefv/Tlr1/Ccl3/Cd40/Fcgr2b/Tnip1/Hif1a/Hmox1/Nod2/Il18rap/Adam17/Plscr1/Nfkb1/Mfhas1/Cdh5/C3ar1/Adora2b/Bcl6/Fpr2/Ccr1/Nlrp3/Nos2/Ccl7/Ptafr/Jak2/Il27/Ecm1/Prkcz/Fancd2/Tnfrsf4/Nupr1	61
GO:0001817	regulation of cytokine production	63/490	465/11002	1.06103e-15	1.06103e-15	8.54689e-13	Acod1/Ptger4/Tlr2/Cd244a/Gbp5/Il1rn/Ccl2/Pde4b/P2ry2/Hgf/Relb/Cd14/Il12b/Cd274/Trim30a/Ccl4/Ccl5/Trex1/Mapkapk2/Tnfaip3/Ifih1/Tnfsf9/Tlr8/Gpr18/Ulbp1/Mefv/Tlr1/Ncl/Ccl3/Cd40/Fcgr2b/Hif1a/Socs1/Hmox1/Iqgap1/Nod2/Src/Adam17/Zc3hav1/Traf3/Panx1/Smad4/Optn/Nfkb1/Clec4e/Icosl/Ifnar1/C3ar1/Adora2b/Bcl6/Ptprj/Nr4a3/Nlrp3/Nos2/Ptafr/Malt1/Jak2/Irak3/Il27/Prkcz/Mcoln2/Il27ra/Tnfrsf4	63
GO:0002237	response to molecule of bacterial origin	39/490	198/11002	2.15054e-15	2.15054e-15	1.38585e-12	Ccl12/Cxcl16/Cxcl10/Acod1/Ptger4/Tlr2/Noct/Tnip2/Il1rn/Ccl2/Pde4b/Cd14/Gbp2/Tnip3/Il12b/Cd274/Ccl5/Mapkapk2/Adam9/Cxcl11/Tnfaip3/Tlr1/Paf1/Ncl/Fcgr2b/Nod2/Adam17/Plscr1/Nfkb1/Cd86/Irgm2/Ifnar1/Nfkbib/Nlrp3/Nos2/Ptafr/Malt1/Jak2/Irak3	39
GO:0071219	cellular response to molecule of bacterial origin	32/490	139/11002	7.55681e-15	7.55681e-15	4.05814e-12	Ccl12/Cxcl16/Cxcl10/Acod1/Tlr2/Tnip2/Il1rn/Ccl2/Pde4b/Cd14/Gbp2/Tnip3/Il12b/Cd274/Ccl5/Adam9/Cxcl11/Tnfaip3/Tlr1/Paf1/Ncl/Fcgr2b/Nod2/Plscr1/Nfkb1/Cd86/Irgm2/Nfkbib/Nlrp3/Nos2/Malt1/Jak2	32
GO:0032496	response to lipopolysaccharide	36/490	184/11002	3.3338e-14	3.3338e-14	1.53455e-11	Ccl12/Cxcl16/Cxcl10/Acod1/Ptger4/Noct/Tnip2/Il1rn/Ccl2/Pde4b/Cd14/Gbp2/Tnip3/Il12b/Cd274/Ccl5/Mapkapk2/Adam9/Cxcl11/Tnfaip3/Paf1/Ncl/Nod2/Adam17/Plscr1/Nfkb1/Cd86/Irgm2/Ifnar1/Nfkbib/Nlrp3/Nos2/Ptafr/Malt1/Jak2/Irak3	36
GO:0050776	regulation of immune response	59/490	455/11002	6.84289e-14	6.84289e-14	2.38594e-11	Acod1/Tlr2/Treml2/Gbp5/Pde4b/Nectin2/Il12b/Cd274/Lcp2/Samsn1/Trex1/Tnfaip3/Parp14/Hlx/Bcl2a1d/Ptpn2/Tlr8/Irgm1/Ulbp1/Clec2d/Hexim1/Cd40/Fcgr2b/Clec4d/Socs1/Hmox1/Nod2/Il18rap/Plscr1/Clec4e/Ikbke/Icosl/Irgm2/Braf/C3ar1/Hspa8/Adora2b/Bcl6/Ptprj/Fpr2/Nr4a3/Fyb/Ccr1/Nlrp3/Spns2/Bcar1/Rac2/Pik3r6/Ptafr/Malt1/Pspc1/Irak3/Il27/Cd38/Ecm1/Prkcz/Il27ra/C1rl/Fcrlb	59
GO:0071216	cellular response to biotic stimulus	33/490	159/11002	6.91711e-14	6.91711e-14	2.38594e-11	Ccl12/Cxcl16/Cxcl10/Acod1/Tlr2/Tnip2/Il1rn/Ccl2/Pde4b/Cd14/Gbp2/Tnip3/Il12b/Cd274/Ccl5/Adam9/Cxcl11/Tnfaip3/Tlr1/Paf1/Ncl/Fcgr2b/Hspa5/Nod2/Plscr1/Nfkb1/Cd86/Irgm2/Nfkbib/Nlrp3/Nos2/Malt1/Jak2	33
GO:0050865	regulation of cell activation	53/490	380/11002	7.40491e-14	7.40491e-14	2.38594e-11	Ldlr/Cd244a/Cdkn1a/Sdc4/Tnip2/Ccl2/Nectin2/Vcam1/Il12b/Cd274/Ccl5/Samsn1/Trex1/Tnfaip3/Tnfsf9/Hlx/Ptpn2/Slamf7/Ulbp1/Plek/Mmp14/Ahr/Cd40/Fcgr2b/Il15ra/Clec4d/Socs1/Hmox1/Nod2/Plscr1/Cd86/Mfhas1/Icosl/Braf/Pdgfa/Adora2b/Bcl6/Ptprj/Nr4a3/Zeb1/Nlrp3/Rac2/Pik3r6/Ptafr/Malt1/Jak2/Il27/Cd38/Zc3h12d/Prkcz/Fancd2/Il27ra/Tnfrsf4	53
GO:0034341	response to interferon-gamma	27/490	107/11002	9.22378e-14	9.22378e-14	2.70182e-11	Ccl12/Cxcl16/Acod1/Tlr2/Gbp5/Ccl2/Gbp3/Ccl22/Gbp2/Il12b/Ccl4/Ccl9/Ccl5/Parp14/Ptpn2/Irgm1/Mefv/Actr3/Ccl3/Eprs/Socs1/Stx11/Irgm2/Nos2/Ccl7/Jak2/Gbp2b	27
GO:0006935	chemotaxis	48/490	324/11002	1.22652e-13	1.22652e-13	3.29331e-11	Ccl12/Cxcl16/Cxcl10/Spp1/Ch25h/Csf1/Ccrl2/Gpr35/Il1rn/Ccl2/Pde4b/Ccl22/Hgf/Vcam1/Ccl4/Ccl9/Nrp2/Ccl5/Cxcl11/Sema4a/Ptpn2/Saa3/Ppm1f/Gpr18/Vasp/Ccl3/Nod2/Adam17/Smad4/Pip5k1a/Pdgfa/C3ar1/Ptprj/Fpr2/Nr4a3/Edn1/Ccr1/Bcar1/Rac2/Ntn1/Ccl7/Ptafr/Jaml/Lsp1/Trpm2/Ext1/Nectin1/Plxna1	48
GO:0071346	cellular response to interferon-gamma	25/490	93/11002	1.61713e-13	1.61713e-13	4.00813e-11	Ccl12/Acod1/Tlr2/Gbp5/Ccl2/Gbp3/Ccl22/Gbp2/Il12b/Ccl4/Ccl9/Ccl5/Parp14/Ptpn2/Irgm1/Actr3/Ccl3/Eprs/Socs1/Stx11/Irgm2/Nos2/Ccl7/Jak2/Gbp2b	25
GO:0042330	taxis	48/490	327/11002	1.7484e-13	1.7484e-13	4.02394e-11	Ccl12/Cxcl16/Cxcl10/Spp1/Ch25h/Csf1/Ccrl2/Gpr35/Il1rn/Ccl2/Pde4b/Ccl22/Hgf/Vcam1/Ccl4/Ccl9/Nrp2/Ccl5/Cxcl11/Sema4a/Ptpn2/Saa3/Ppm1f/Gpr18/Vasp/Ccl3/Nod2/Adam17/Smad4/Pip5k1a/Pdgfa/C3ar1/Ptprj/Fpr2/Nr4a3/Edn1/Ccr1/Bcar1/Rac2/Ntn1/Ccl7/Ptafr/Jaml/Lsp1/Trpm2/Ext1/Nectin1/Plxna1	48
GO:0060326	cell chemotaxis	34/490	178/11002	3.65281e-13	3.65281e-13	7.8465e-11	Ccl12/Cxcl16/Cxcl10/Spp1/Ch25h/Csf1/Ccrl2/Gpr35/Il1rn/Ccl2/Pde4b/Ccl22/Hgf/Vcam1/Ccl4/Ccl9/Ccl5/Cxcl11/Saa3/Gpr18/Ccl3/Nod2/Adam17/Pip5k1a/C3ar1/Ptprj/Fpr2/Edn1/Ccr1/Bcar1/Rac2/Ccl7/Jaml/Trpm2	34
GO:0050900	leukocyte migration	38/490	221/11002	4.62763e-13	4.62763e-13	9.31919e-11	Ccl12/Cxcl16/Cxcl10/Ptger4/Tlr2/Spp1/Ch25h/Csf1/Gpr35/Il1rn/Ccl2/Pde4b/Ccl22/Vcam1/Ccl4/Ccl9/Ccl5/Cxcl11/Gpr18/Mmp14/Ccl3/Nod2/Adam17/C3ar1/Ptprj/Fpr2/Edn1/Ccr1/Spns2/Rac2/Ccl7/Ptafr/Jaml/Trpm2/Ecm1/Mcoln2/Il27ra/Itga2b	38
GO:0071222	cellular response to lipopolysaccharide	29/490	132/11002	5.13084e-13	5.13084e-13	9.72477e-11	Ccl12/Cxcl16/Cxcl10/Acod1/Tnip2/Il1rn/Ccl2/Pde4b/Cd14/Gbp2/Tnip3/Il12b/Cd274/Ccl5/Adam9/Cxcl11/Tnfaip3/Paf1/Ncl/Nod2/Plscr1/Nfkb1/Cd86/Irgm2/Nfkbib/Nlrp3/Nos2/Malt1/Jak2	29
GO:0002694	regulation of leukocyte activation	49/490	354/11002	9.29646e-13	9.29646e-13	1.66412e-10	Ldlr/Cd244a/Cdkn1a/Sdc4/Tnip2/Ccl2/Nectin2/Vcam1/Il12b/Cd274/Ccl5/Samsn1/Trex1/Tnfaip3/Tnfsf9/Hlx/Ptpn2/Slamf7/Ulbp1/Mmp14/Ahr/Cd40/Fcgr2b/Il15ra/Clec4d/Socs1/Hmox1/Nod2/Plscr1/Cd86/Mfhas1/Icosl/Braf/Adora2b/Bcl6/Nr4a3/Zeb1/Nlrp3/Rac2/Pik3r6/Ptafr/Malt1/Il27/Cd38/Zc3h12d/Prkcz/Fancd2/Il27ra/Tnfrsf4	49
GO:0001819	positive regulation of cytokine production	45/490	307/11002	1.10272e-12	1.10272e-12	1.87004e-10	Ptger4/Tlr2/Cd244a/Gbp5/Il1rn/Ccl2/Pde4b/P2ry2/Hgf/Cd14/Il12b/Cd274/Ccl4/Ccl5/Mapkapk2/Ifih1/Tnfsf9/Tlr8/Ulbp1/Tlr1/Ncl/Ccl3/Cd40/Hif1a/Nod2/Src/Adam17/Zc3hav1/Panx1/Optn/Clec4e/Icosl/Ifnar1/C3ar1/Adora2b/Ptprj/Nr4a3/Nlrp3/Ptafr/Malt1/Jak2/Il27/Prkcz/Mcoln2/Il27ra	45
GO:0030595	leukocyte chemotaxis	28/490	135/11002	5.79542e-12	5.79542e-12	9.05671e-10	Ccl12/Cxcl16/Cxcl10/Spp1/Ch25h/Csf1/Gpr35/Il1rn/Ccl2/Pde4b/Ccl22/Ccl4/Ccl9/Ccl5/Cxcl11/Gpr18/Ccl3/Nod2/Adam17/C3ar1/Ptprj/Fpr2/Edn1/Ccr1/Rac2/Ccl7/Jaml/Trpm2	28
GO:0046649	lymphocyte activation	57/490	477/11002	5.90269e-12	5.90269e-12	9.05671e-10	Ptger4/Cd244a/Cdkn1a/Treml2/Sdc4/Tnip2/Batf/Ccl2/Relb/Vcam1/Il12b/Cd274/Ccl5/Samsn1/Trex1/Tnfaip3/Sema4a/Tnfsf9/Hlx/Bcl2a1d/Ptpn2/Slamf7/Cdk6/Gpr18/Ulbp1/Mmp14/Ahr/Cd40/Fcgr2b/Il15ra/Clec4d/Socs1/Nod2/Adam17/Clec4e/Impdh2/Cd86/Stx11/Ebi3/Icosl/Ifnar1/Braf/Bcl6/Ptprj/Zeb1/Nlrp3/Rac2/Pik3r6/Malt1/Jaml/Il27/Cd38/Zc3h12d/Prkcz/Fancd2/Il27ra/Tnfrsf4	57
GO:0051272	positive regulation of cellular component movement	50/490	389/11002	9.0491e-12	9.0491e-12	1.32533e-09	Ccl12/Cxcl16/Cxcl10/Ptger4/Tlr2/Csf1/Ccl2/P2ry2/Hgf/Itga5/Cd274/Ccl4/Ccl5/Elp5/Adam9/Sema4a/Nfe2l2/Ppm1f/Dab2/Mmp14/Glipr2/Actr3/Cd40/Acvr1b/Hspa5/Hif1a/Sod2/Hmox1/Iqgap1/Src/Adam17/Diaph1/Cdh5/Pdgfa/C3ar1/Adora2b/Bcl6/Ptprj/Rhoc/Fpr2/Nr4a3/Edn1/Ccr1/Bcar1/Rac2/Ntn1/Ptafr/Jak2/Plk2/Itga2b	50
GO:2000147	positive regulation of cell motility	49/490	378/11002	1.08644e-11	1.08644e-11	1.52202e-09	Ccl12/Cxcl16/Cxcl10/Ptger4/Tlr2/Csf1/Ccl2/P2ry2/Hgf/Itga5/Cd274/Ccl4/Ccl5/Elp5/Adam9/Sema4a/Nfe2l2/Ppm1f/Dab2/Mmp14/Glipr2/Actr3/Cd40/Acvr1b/Hspa5/Hif1a/Sod2/Hmox1/Iqgap1/Src/Adam17/Diaph1/Cdh5/Pdgfa/C3ar1/Adora2b/Ptprj/Rhoc/Fpr2/Nr4a3/Edn1/Ccr1/Bcar1/Rac2/Ntn1/Ptafr/Jak2/Plk2/Itga2b	49
GO:0030335	positive regulation of cell migration	48/490	370/11002	1.74248e-11	1.74248e-11	2.18117e-09	Ccl12/Cxcl16/Cxcl10/Ptger4/Tlr2/Csf1/Ccl2/P2ry2/Hgf/Itga5/Cd274/Ccl4/Ccl5/Elp5/Adam9/Sema4a/Nfe2l2/Ppm1f/Dab2/Mmp14/Glipr2/Actr3/Cd40/Acvr1b/Hspa5/Hif1a/Sod2/Hmox1/Iqgap1/Src/Adam17/Diaph1/Cdh5/Pdgfa/C3ar1/Adora2b/Ptprj/Rhoc/Fpr2/Nr4a3/Edn1/Ccr1/Bcar1/Rac2/Ptafr/Jak2/Plk2/Itga2b	48
GO:0031347	regulation of defense response	49/490	383/11002	1.76004e-11	1.76004e-11	2.18117e-09	Acod1/Ptger4/Tlr2/Ldlr/Treml2/Gbp5/Hgf/Nectin2/Il12b/Ccl5/Trex1/Tnfaip3/Parp14/Ptpn2/Tlr8/Irgm1/Ulbp1/Mefv/Apobec3/Clec2d/Hexim1/Ccl3/Fcgr2b/Tnip1/Socs1/Nod2/Il18rap/Zc3hav1/Traf3/Optn/Plscr1/Nfkb1/Ikbke/Mfhas1/Cdh5/Irgm2/Adora2b/Bcl6/Fpr2/Ccr1/Nlrp3/Nos2/Pik3r6/Pspc1/Jak2/Irak3/Il27/Fancd2/Nupr1	49
GO:0040017	positive regulation of locomotion	49/490	383/11002	1.76004e-11	1.76004e-11	2.18117e-09	Ccl12/Cxcl16/Cxcl10/Ptger4/Tlr2/Csf1/Ccl2/P2ry2/Hgf/Itga5/Cd274/Ccl4/Ccl5/Elp5/Adam9/Sema4a/Nfe2l2/Ppm1f/Dab2/Mmp14/Glipr2/Actr3/Cd40/Acvr1b/Hspa5/Hif1a/Sod2/Hmox1/Iqgap1/Src/Adam17/Diaph1/Cdh5/Pdgfa/C3ar1/Adora2b/Ptprj/Rhoc/Fpr2/Nr4a3/Edn1/Ccr1/Bcar1/Rac2/Ntn1/Ptafr/Jak2/Plk2/Itga2b	49
GO:1990266	neutrophil migration	20/490	72/11002	2.32367e-11	2.32367e-11	2.773e-09	Ccl12/Cxcl10/Ptger4/Spp1/Il1rn/Ccl2/Pde4b/Ccl22/Ccl4/Ccl9/Ccl5/Cxcl11/Ccl3/Nod2/C3ar1/Edn1/Rac2/Ccl7/Jaml/Mcoln2	20
GO:0097530	granulocyte migration	22/490	89/11002	2.9314e-11	2.9314e-11	3.29751e-09	Ccl12/Cxcl10/Ptger4/Spp1/Csf1/Il1rn/Ccl2/Pde4b/Ccl22/Ccl4/Ccl9/Ccl5/Cxcl11/Ccl3/Nod2/C3ar1/Ptprj/Edn1/Rac2/Ccl7/Jaml/Mcoln2	22
GO:0030593	neutrophil chemotaxis	18/490	58/11002	3.00307e-11	3.00307e-11	3.29751e-09	Ccl12/Cxcl10/Spp1/Il1rn/Ccl2/Pde4b/Ccl22/Ccl4/Ccl9/Ccl5/Cxcl11/Ccl3/Nod2/C3ar1/Edn1/Rac2/Ccl7/Jaml	18
GO:0071621	granulocyte chemotaxis	20/490	73/11002	3.07021e-11	3.07021e-11	3.29751e-09	Ccl12/Cxcl10/Spp1/Csf1/Il1rn/Ccl2/Pde4b/Ccl22/Ccl4/Ccl9/Ccl5/Cxcl11/Ccl3/Nod2/C3ar1/Ptprj/Edn1/Rac2/Ccl7/Jaml	20
GO:0032103	positive regulation of response to external stimulus	38/490	256/11002	4.70963e-11	4.70963e-11	4.89514e-09	Cxcl10/Acod1/Ptger4/Tlr2/Ldlr/Csf1/Gbp5/Ccl2/Nectin2/Il12b/Ccl4/Ccl5/Tlr8/Ppm1f/Irgm1/Ulbp1/Hexim1/Ccl3/Tnip1/Nod2/Il18rap/Adam17/Zc3hav1/Optn/Plscr1/Ikbke/Irgm2/Braf/C3ar1/Adora2b/Ptprj/Fpr2/Edn1/Ccr1/Rac2/Pspc1/Jak2/Nupr1	38
GO:0097529	myeloid leukocyte migration	26/490	132/11002	1.13394e-10	1.13394e-10	1.14178e-08	Ccl12/Cxcl10/Ptger4/Spp1/Csf1/Gpr35/Il1rn/Ccl2/Pde4b/Ccl22/Ccl4/Ccl9/Ccl5/Cxcl11/Mmp14/Ccl3/Nod2/C3ar1/Ptprj/Fpr2/Edn1/Ccr1/Rac2/Ccl7/Jaml/Mcoln2	26
GO:0002274	myeloid leukocyte activation	28/490	155/11002	1.82649e-10	1.82649e-10	1.78168e-08	Tlr2/Ldlr/Cd244a/Tnip2/Batf/Nectin2/Relb/Lcp2/Ccl5/Trex1/Adam9/Tnfsf9/Nampt/Tlr8/Ulbp1/Tlr1/Clec4d/Hmox1/Il18rap/Plscr1/Mfhas1/Stx11/Adora2b/Fpr2/Nr4a3/Rac2/Ptafr/Jak2	28
GO:0071396	cellular response to lipid	41/490	305/11002	1.88005e-10	1.88005e-10	1.78168e-08	Ccl12/Cxcl16/Cxcl10/Acod1/Ptger4/Ldlr/Spp1/Tnip2/Il1rn/Ccl2/Pde4b/Cd14/Gbp2/Tnip3/Il12b/Cd274/Ccl5/Adam9/Cxcl11/Tnfaip3/Dab2/Paf1/Ncl/Ahr/Rest/Nod2/Src/Dnaja1/Plscr1/Nfkb1/Daxx/Cd86/Irgm2/Atp1a1/Eif4ebp1/Nfkbib/Nlrp3/Nos2/Malt1/Jak2/Id3	41
GO:0051249	regulation of lymphocyte activation	40/490	295/11002	2.43077e-10	2.43077e-10	2.20074e-08	Cd244a/Cdkn1a/Sdc4/Tnip2/Ccl2/Vcam1/Il12b/Cd274/Ccl5/Samsn1/Trex1/Tnfaip3/Tnfsf9/Hlx/Ptpn2/Slamf7/Ulbp1/Mmp14/Ahr/Cd40/Fcgr2b/Il15ra/Socs1/Nod2/Cd86/Icosl/Braf/Bcl6/Zeb1/Nlrp3/Rac2/Pik3r6/Malt1/Il27/Cd38/Zc3h12d/Prkcz/Fancd2/Il27ra/Tnfrsf4	40
GO:0019221	cytokine-mediated signaling pathway	34/490	223/11002	2.45885e-10	2.45885e-10	2.20074e-08	Ccl12/Cxcl10/Csf1/Tnip2/Gpr35/Csf2rb2/Il1rn/Ccl2/Ccl22/Csf2rb/Ccl4/Ccl9/Ccl5/Trex1/Cxcl11/Stat2/Parp14/Ptpn2/Irgm1/Ccl3/Il15ra/Socs1/Il18rap/Adam17/Traf3/Smad4/Ikbke/Irgm2/Ifnar1/Ccr1/Ccl7/Jak2/Irak3/Ecm1	34
GO:0002831	regulation of response to biotic stimulus	33/490	212/11002	2.6102e-10	2.6102e-10	2.27307e-08	Acod1/Tlr2/Treml2/Gbp5/Nectin2/Il12b/Cd274/Ccl5/Trex1/Tnfaip3/Parp14/Ptpn2/Tlr8/Irgm1/Ulbp1/Apobec3/Clec2d/Hexim1/Socs1/Nod2/Il18rap/Zc3hav1/Traf3/Optn/Plscr1/Ikbke/Irgm2/Fpr2/Ccr1/Pik3r6/Pspc1/Irak3/Il27	33
GO:0045088	regulation of innate immune response	26/490	138/11002	3.17205e-10	3.17205e-10	2.68965e-08	Acod1/Tlr2/Treml2/Gbp5/Nectin2/Il12b/Trex1/Tnfaip3/Parp14/Ptpn2/Tlr8/Irgm1/Ulbp1/Clec2d/Hexim1/Socs1/Nod2/Il18rap/Plscr1/Ikbke/Irgm2/Fpr2/Ccr1/Pik3r6/Pspc1/Irak3	26
GO:0033993	response to lipid	49/490	421/11002	5.11885e-10	5.11885e-10	4.2291e-08	Ccl12/Cxcl16/Cxcl10/Acod1/Ptger4/Tlr2/Ldlr/Noct/Spp1/Tnip2/Il1rn/Ccl2/Pde4b/Cd14/Gbp2/Tnip3/Il12b/Cd274/Ccl5/Mapkapk2/Adam9/Cxcl11/Tnfaip3/Dab2/Paf1/Ncl/Ahr/Rest/Igf2r/Nod2/Src/Adam17/Dnaja1/Plscr1/Nfkb1/Daxx/Cd86/Irgm2/Ifnar1/Atp1a1/Eif4ebp1/Nfkbib/Nlrp3/Nos2/Ptafr/Malt1/Jak2/Irak3/Id3	49
GO:0050663	cytokine secretion	27/490	158/11002	1.40845e-09	1.40845e-09	1.13455e-07	Ptger4/Tlr2/Cd244a/Gbp5/Cd14/Cd274/Rnf19b/Lcp2/Tnfaip3/Ifih1/Tlr8/Tlr1/Ncl/Ccl3/Socs1/Nod2/Src/Panx1/Optn/Clec4e/Ifnar1/Nlrp3/Nos2/Prkcz/Mcoln2/Il27ra/Tnfrsf4	27
GO:0042110	T cell activation	41/490	328/11002	1.75447e-09	1.75447e-09	1.3788e-07	Ptger4/Cd244a/Treml2/Sdc4/Batf/Ccl2/Relb/Vcam1/Il12b/Cd274/Ccl5/Trex1/Sema4a/Tnfsf9/Hlx/Bcl2a1d/Ptpn2/Cdk6/Gpr18/Clec4d/Socs1/Adam17/Clec4e/Cd86/Stx11/Ebi3/Icosl/Ifnar1/Braf/Bcl6/Zeb1/Nlrp3/Rac2/Pik3r6/Malt1/Jaml/Il27/Zc3h12d/Prkcz/Fancd2/Tnfrsf4	41
GO:0050867	positive regulation of cell activation	33/490	228/11002	1.79756e-09	1.79756e-09	1.37903e-07	Cd244a/Cdkn1a/Tnip2/Ccl2/Nectin2/Vcam1/Il12b/Cd274/Ccl5/Tnfsf9/Hlx/Ulbp1/Plek/Mmp14/Cd40/Il15ra/Clec4d/Socs1/Nod2/Cd86/Icosl/Adora2b/Bcl6/Ptprj/Nr4a3/Nlrp3/Pik3r6/Ptafr/Malt1/Jak2/Cd38/Prkcz/Tnfrsf4	33
GO:0050778	positive regulation of immune response	41/490	333/11002	2.76189e-09	2.76189e-09	2.06956e-07	Acod1/Tlr2/Gbp5/Pde4b/Nectin2/Il12b/Cd274/Lcp2/Trex1/Hlx/Bcl2a1d/Ptpn2/Tlr8/Irgm1/Ulbp1/Hexim1/Cd40/Fcgr2b/Nod2/Il18rap/Plscr1/Ikbke/Icosl/Irgm2/Braf/C3ar1/Hspa8/Adora2b/Ptprj/Fpr2/Nr4a3/Fyb/Nlrp3/Bcar1/Ptafr/Malt1/Pspc1/Cd38/Prkcz/Il27ra/C1rl	41
GO:0002250	adaptive immune response	36/490	275/11002	5.21214e-09	5.21214e-09	3.81683e-07	Nfkb2/Cd244a/Batf/Nectin2/Relb/Il12b/Cd274/Rnf19b/Samsn1/Trex1/Tnfaip3/Sema4a/Hlx/Slamf7/Ulbp1/Cd40/Fcgr2b/Clec4d/Nod2/Il18rap/Adam17/Cd86/Stx11/Icosl/C3ar1/Hspa8/Bcl6/Nlrp3/Malt1/Jak2/Il27/Prkcz/Mcoln2/Il27ra/Serpina3g/C1rl	36
GO:1903532	positive regulation of secretion by cell	37/490	289/11002	5.86335e-09	5.86335e-09	4.1983e-07	Hcar2/Ptger4/Tlr2/Cd244a/Sdc4/Spp1/P2ry2/Cd14/Cd274/Adam9/Ifih1/Tlr8/Dab2/Tlr1/Ncl/Nadk/Ccl3/Mmp13/Rab8b/Hif1a/Nod2/Src/Panx1/Smad4/Clec4e/Ifnar1/Adora2b/Sri/Edn1/Nlrp3/Ptafr/Jak2/Cd38/Unc13a/Trpm2/Prkcz/Tnfrsf4	37
GO:0009306	protein secretion	45/490	397/11002	6.28969e-09	6.28969e-09	4.31192e-07	Hcar2/Ptger4/Tlr2/Cd244a/Gbp5/Rhbdf2/Il1rn/Cd14/Cd274/Rnf19b/Lcp2/Ccl5/Adam9/Tnfaip3/Ifih1/Tlr8/Vgf/Plek/Tlr1/Ncl/Nadk/Ccl3/Mmp13/Cd40/Rab8b/Hif1a/Socs1/Rest/Nod2/Src/Panx1/Optn/Clec4e/Ifnar1/Sri/Nlrp3/Nos2/Jak2/Cd38/Trpm2/Rab11fip1/Prkcz/Mcoln2/Il27ra/Tnfrsf4	45
GO:0035592	establishment of protein localization to extracellular region	45/490	397/11002	6.28969e-09	6.28969e-09	4.31192e-07	Hcar2/Ptger4/Tlr2/Cd244a/Gbp5/Rhbdf2/Il1rn/Cd14/Cd274/Rnf19b/Lcp2/Ccl5/Adam9/Tnfaip3/Ifih1/Tlr8/Vgf/Plek/Tlr1/Ncl/Nadk/Ccl3/Mmp13/Cd40/Rab8b/Hif1a/Socs1/Rest/Nod2/Src/Panx1/Optn/Clec4e/Ifnar1/Sri/Nlrp3/Nos2/Jak2/Cd38/Trpm2/Rab11fip1/Prkcz/Mcoln2/Il27ra/Tnfrsf4	45
GO:0071347	cellular response to interleukin-1	15/490	54/11002	7.56296e-09	7.56296e-09	5.06554e-07	Ccl12/Acod1/Tnip2/Il1rn/Ccl2/Ccl22/Ccl4/Ccl9/Ccl5/Tank/Saa3/Ccl3/Nfkb1/Ccl7/Irak3	15
GO:0071692	protein localization to extracellular region	45/490	400/11002	7.95333e-09	7.95333e-09	5.06554e-07	Hcar2/Ptger4/Tlr2/Cd244a/Gbp5/Rhbdf2/Il1rn/Cd14/Cd274/Rnf19b/Lcp2/Ccl5/Adam9/Tnfaip3/Ifih1/Tlr8/Vgf/Plek/Tlr1/Ncl/Nadk/Ccl3/Mmp13/Cd40/Rab8b/Hif1a/Socs1/Rest/Nod2/Src/Panx1/Optn/Clec4e/Ifnar1/Sri/Nlrp3/Nos2/Jak2/Cd38/Trpm2/Rab11fip1/Prkcz/Mcoln2/Il27ra/Tnfrsf4	45
GO:0048247	lymphocyte chemotaxis	12/490	33/11002	8.04069e-09	8.04069e-09	5.06554e-07	Ccl12/Cxcl16/Cxcl10/Ch25h/Ccl2/Ccl22/Ccl4/Ccl9/Ccl5/Ccl3/Adam17/Ccl7	12
GO:0070098	chemokine-mediated signaling pathway	12/490	33/11002	8.04069e-09	8.04069e-09	5.06554e-07	Ccl12/Cxcl10/Gpr35/Ccl2/Ccl22/Ccl4/Ccl9/Ccl5/Cxcl11/Ccl3/Ccr1/Ccl7	12
GO:0023061	signal release	49/490	457/11002	8.17502e-09	8.17502e-09	5.06554e-07	Hcar2/Ptger4/Tlr2/Cd244a/Spp1/Gbp5/Il1rn/P2ry2/Cd14/Cd274/Rnf19b/Lcp2/Ccl5/Tnfaip3/Ifih1/Tlr8/Dab2/Vgf/Tlr1/Ncl/Nadk/Ccl3/Rab8b/Hif1a/Socs1/Rest/Nod2/Src/Panx1/Smad4/Optn/Clec4e/Stx11/Ifnar1/Braf/Adora2b/Sri/Edn1/Nlrp3/Nos2/Jak2/Cd38/Unc13a/Trpm2/Rab11fip1/Prkcz/Mcoln2/Il27ra/Tnfrsf4	49
GO:0002790	peptide secretion	46/490	416/11002	9.25858e-09	9.25858e-09	5.6287e-07	Hcar2/Ptger4/Tlr2/Cd244a/Gbp5/Rhbdf2/Il1rn/Cd14/Cd274/Rnf19b/Lcp2/Ccl5/Adam9/Tnfaip3/Ifih1/Tlr8/Vgf/Plek/Tlr1/Ncl/Nadk/Ccl3/Mmp13/Cd40/Rab8b/Hif1a/Socs1/Rest/Nod2/Src/Panx1/Optn/Clec4e/Ifnar1/Sri/Edn1/Nlrp3/Nos2/Jak2/Cd38/Trpm2/Rab11fip1/Prkcz/Mcoln2/Il27ra/Tnfrsf4	46
GO:0071674	mononuclear cell migration	15/490	55/11002	9.97918e-09	9.97918e-09	5.95444e-07	Ccl12/Cxcl10/Csf1/Ccl2/Ccl22/Ccl4/Ccl9/Ccl5/Ccl3/C3ar1/Ptprj/Fpr2/Ccr1/Ccl7/Jaml	15
GO:0051047	positive regulation of secretion	37/490	299/11002	1.4815e-08	1.4815e-08	8.6792e-07	Hcar2/Ptger4/Tlr2/Cd244a/Sdc4/Spp1/P2ry2/Cd14/Cd274/Adam9/Ifih1/Tlr8/Dab2/Tlr1/Ncl/Nadk/Ccl3/Mmp13/Rab8b/Hif1a/Nod2/Src/Panx1/Smad4/Clec4e/Ifnar1/Adora2b/Sri/Edn1/Nlrp3/Ptafr/Jak2/Cd38/Unc13a/Trpm2/Prkcz/Tnfrsf4	37
GO:0070555	response to interleukin-1	16/490	67/11002	2.57652e-08	2.57652e-08	1.48247e-06	Ccl12/Acod1/Tnip2/Il1rn/Ccl2/Ccl22/Ccl4/Ccl9/Ccl5/Tank/Saa3/Ccl3/Src/Nfkb1/Ccl7/Irak3	16
GO:0002221	pattern recognition receptor signaling pathway	21/490	115/11002	2.92374e-08	2.92374e-08	1.65274e-06	Acod1/Tlr2/Tnip2/Cd14/Tnip3/Trim30a/Mapkapk2/Tnfaip3/Ifih1/Tlr8/Tlr1/Alpk1/Tnip1/Nod2/Zc3hav1/Traf3/Clec4e/Cd86/Mfhas1/Irgm2/Irak3	21
GO:0002696	positive regulation of leukocyte activation	30/490	218/11002	3.26434e-08	3.26434e-08	1.81345e-06	Cd244a/Cdkn1a/Tnip2/Ccl2/Nectin2/Vcam1/Il12b/Cd274/Ccl5/Tnfsf9/Hlx/Ulbp1/Mmp14/Cd40/Il15ra/Clec4d/Socs1/Nod2/Cd86/Icosl/Adora2b/Bcl6/Nr4a3/Nlrp3/Pik3r6/Ptafr/Malt1/Cd38/Prkcz/Tnfrsf4	30
GO:1903555	regulation of tumor necrosis factor superfamily cytokine production	22/490	127/11002	3.71388e-08	3.71388e-08	2.02822e-06	Ptger4/Tlr2/Ccl2/Cd14/Il12b/Cd274/Trim30a/Ccl4/Trex1/Mapkapk2/Tnfaip3/Ifih1/Gpr18/Tlr1/Ncl/Ccl3/Nod2/Ptprj/Ptafr/Jak2/Irak3/Il27ra	22
GO:0071706	tumor necrosis factor superfamily cytokine production	22/490	130/11002	5.74504e-08	5.74504e-08	3.08519e-06	Ptger4/Tlr2/Ccl2/Cd14/Il12b/Cd274/Trim30a/Ccl4/Trex1/Mapkapk2/Tnfaip3/Ifih1/Gpr18/Tlr1/Ncl/Ccl3/Nod2/Ptprj/Ptafr/Jak2/Irak3/Il27ra	22
GO:0034612	response to tumor necrosis factor	21/490	121/11002	7.34682e-08	7.34682e-08	3.88069e-06	Ccl12/Cxcl16/Acod1/Birc3/Ccl2/Ccl22/Cd14/Ccl4/Ccl9/Ccl5/Tank/Adam9/Ptpn2/Nfe2l2/Actr3/Ccl3/Adam17/Traf3/Nfkb1/Ccl7/Jak2	21
GO:0032680	regulation of tumor necrosis factor production	21/490	125/11002	1.31145e-07	1.31145e-07	6.64161e-06	Ptger4/Tlr2/Ccl2/Cd14/Il12b/Trim30a/Ccl4/Trex1/Mapkapk2/Tnfaip3/Ifih1/Gpr18/Tlr1/Ncl/Ccl3/Nod2/Ptprj/Ptafr/Jak2/Irak3/Il27ra	21
GO:0002521	leukocyte differentiation	41/490	381/11002	1.3152e-07	1.3152e-07	6.64161e-06	Ptger4/Tlr2/Csf1/Batf/Relb/Il12b/Ccl5/Snx10/Tnfaip3/Sema4a/Tnfsf9/Hlx/Bcl2a1d/Ptpn2/Cdk6/Gpr18/Clec2d/Mmp14/Ahr/Ccl3/Zbtb46/Il15ra/Clec4d/Socs1/Src/Adam17/Clec4e/Braf/Bcl6/Cd101/Ptprj/Zeb1/Ccr1/Nlrp3/Pik3r6/Malt1/Nme2/Il27/Trpm2/Prkcz/Fancd2	41
GO:0002685	regulation of leukocyte migration	22/490	136/11002	1.31921e-07	1.31921e-07	6.64161e-06	Ccl12/Cxcl10/Ptger4/Tlr2/Csf1/Ccl2/Ccl4/Ccl5/Gpr18/Mmp14/Nod2/Adam17/C3ar1/Ptprj/Fpr2/Edn1/Ccr1/Rac2/Ptafr/Ecm1/Il27ra/Itga2b	22
GO:0072677	eosinophil migration	8/490	16/11002	1.37291e-07	1.37291e-07	6.80562e-06	Ccl12/Ptger4/Ccl2/Ccl22/Ccl4/Ccl9/Ccl5/Ccl7	8
GO:0002697	regulation of immune effector process	34/490	285/11002	1.42508e-07	1.42508e-07	6.95722e-06	Tlr2/Cd244a/Ccl2/Nectin2/Il12b/Ccl5/Trex1/Tnfaip3/Hlx/Ulbp1/Apobec3/Clec2d/Cd40/Fcgr2b/Hmox1/Nod2/Il18rap/Zc3hav1/Traf3/Hspa8/Adora2b/Bcl6/Ptprj/Nr4a3/Nlrp3/Rac2/Pik3r6/Ptafr/Malt1/Irak3/Il27/Prkcz/Il27ra/Tnfrsf4	34
GO:0045785	positive regulation of cell adhesion	33/490	273/11002	1.60088e-07	1.60088e-07	7.69882e-06	Ptger4/Cd244a/Sdc4/Spp1/Csf1/Ccl2/Vcam1/Itga5/Il12b/Emilin2/Cd274/Ccl5/Adam9/Tnfsf9/Hlx/Ppm1f/Dab2/Cdk6/Socs1/Iqgap1/Src/Cd86/Icosl/Braf/Bcl6/Ptprj/Nr4a3/Nlrp3/Pik3r6/Ptafr/Malt1/Jak2/Prkcz	33
GO:0050708	regulation of protein secretion	36/490	314/11002	1.66061e-07	1.66061e-07	7.84454e-06	Hcar2/Ptger4/Tlr2/Cd244a/Rhbdf2/Cd14/Cd274/Ccl5/Adam9/Tnfaip3/Ifih1/Tlr8/Tlr1/Ncl/Nadk/Ccl3/Mmp13/Cd40/Hif1a/Socs1/Rest/Nod2/Src/Panx1/Clec4e/Ifnar1/Sri/Nlrp3/Nos2/Jak2/Cd38/Trpm2/Rab11fip1/Prkcz/Il27ra/Tnfrsf4	36
GO:0002793	positive regulation of peptide secretion	28/490	209/11002	1.67987e-07	1.67987e-07	7.84454e-06	Hcar2/Ptger4/Tlr2/Cd244a/Cd14/Cd274/Adam9/Ifih1/Tlr8/Tlr1/Ncl/Nadk/Ccl3/Mmp13/Rab8b/Hif1a/Nod2/Src/Panx1/Clec4e/Ifnar1/Sri/Nlrp3/Jak2/Cd38/Trpm2/Prkcz/Tnfrsf4	28
GO:0002687	positive regulation of leukocyte migration	18/490	96/11002	1.89002e-07	1.89002e-07	8.67082e-06	Ccl12/Cxcl10/Ptger4/Tlr2/Csf1/Ccl2/Ccl4/Ccl5/Mmp14/Adam17/C3ar1/Ptprj/Fpr2/Edn1/Ccr1/Rac2/Ptafr/Itga2b	18
GO:0002548	monocyte chemotaxis	11/490	35/11002	1.93006e-07	1.93006e-07	8.67082e-06	Ccl12/Cxcl10/Ccl2/Ccl22/Ccl4/Ccl9/Ccl5/Ccl3/Fpr2/Ccr1/Ccl7	11
GO:0050714	positive regulation of protein secretion	27/490	198/11002	1.94312e-07	1.94312e-07	8.67082e-06	Hcar2/Ptger4/Tlr2/Cd244a/Cd14/Cd274/Adam9/Ifih1/Tlr8/Tlr1/Ncl/Nadk/Ccl3/Mmp13/Hif1a/Nod2/Src/Panx1/Clec4e/Ifnar1/Sri/Nlrp3/Jak2/Cd38/Trpm2/Prkcz/Tnfrsf4	27
GO:0002791	regulation of peptide secretion	37/490	330/11002	1.96926e-07	1.96926e-07	8.67082e-06	Hcar2/Ptger4/Tlr2/Cd244a/Rhbdf2/Cd14/Cd274/Ccl5/Adam9/Tnfaip3/Ifih1/Tlr8/Tlr1/Ncl/Nadk/Ccl3/Mmp13/Cd40/Rab8b/Hif1a/Socs1/Rest/Nod2/Src/Panx1/Clec4e/Ifnar1/Sri/Nlrp3/Nos2/Jak2/Cd38/Trpm2/Rab11fip1/Prkcz/Il27ra/Tnfrsf4	37
GO:0032640	tumor necrosis factor production	21/490	128/11002	1.99137e-07	1.99137e-07	8.67082e-06	Ptger4/Tlr2/Ccl2/Cd14/Il12b/Trim30a/Ccl4/Trex1/Mapkapk2/Tnfaip3/Ifih1/Gpr18/Tlr1/Ncl/Ccl3/Nod2/Ptprj/Ptafr/Jak2/Irak3/Il27ra	21
GO:0072676	lymphocyte migration	15/490	68/11002	2.17817e-07	2.17817e-07	9.35773e-06	Ccl12/Cxcl16/Cxcl10/Ch25h/Ccl2/Ccl22/Ccl4/Ccl9/Ccl5/Ccl3/Adam17/Spns2/Ccl7/Ecm1/Il27ra	15
GO:0055080	cation homeostasis	42/490	403/11002	2.23964e-07	2.23964e-07	9.49522e-06	Cxcl10/Slc39a14/Ptger4/Ccrl2/Gpr35/Ccl2/P2ry2/Herpud1/Clic4/Fth1/Ccl5/Slc11a2/Snx10/Slc31a1/Atp6v0c/Gpr18/Anpep/Ccl3/Cd40/Mllt6/Hif1a/Synpo/Sod2/Lcn2/Hmox1/Diaph1/Slc30a4/Smad4/Anxa6/Atp6v0a1/Cdh5/Slc12a4/Atp1a1/C3ar1/Sri/Fpr2/Edn1/Ccr1/Jak2/Cd38/Trpm2/Slc4a3	42
GO:1990868	response to chemokine	12/490	43/11002	2.31187e-07	2.31187e-07	9.55013e-06	Ccl12/Cxcl10/Gpr35/Ccl2/Ccl22/Ccl4/Ccl9/Ccl5/Cxcl11/Ccl3/Ccr1/Ccl7	12
GO:1990869	cellular response to chemokine	12/490	43/11002	2.31187e-07	2.31187e-07	9.55013e-06	Ccl12/Cxcl10/Gpr35/Ccl2/Ccl22/Ccl4/Ccl9/Ccl5/Cxcl11/Ccl3/Ccr1/Ccl7	12
GO:0002833	positive regulation of response to biotic stimulus	19/490	108/11002	2.47229e-07	2.47229e-07	1.00835e-05	Acod1/Tlr2/Gbp5/Nectin2/Il12b/Cd274/Tlr8/Irgm1/Ulbp1/Hexim1/Nod2/Il18rap/Zc3hav1/Optn/Plscr1/Ikbke/Irgm2/Fpr2/Pspc1	19
GO:0098771	inorganic ion homeostasis	42/490	409/11002	3.35755e-07	3.35755e-07	1.3523e-05	Cxcl10/Slc39a14/Ptger4/Ccrl2/Gpr35/Ccl2/P2ry2/Herpud1/Clic4/Fth1/Ccl5/Slc11a2/Snx10/Slc31a1/Atp6v0c/Gpr18/Anpep/Ccl3/Cd40/Mllt6/Hif1a/Synpo/Sod2/Lcn2/Hmox1/Diaph1/Slc30a4/Smad4/Anxa6/Atp6v0a1/Cdh5/Slc12a4/Atp1a1/C3ar1/Sri/Fpr2/Edn1/Ccr1/Jak2/Cd38/Trpm2/Slc4a3	42
GO:0002768	immune response-regulating cell surface receptor signaling pathway	21/490	132/11002	3.4028e-07	3.4028e-07	1.3536e-05	Tlr2/Pde4b/Nectin2/Lcp2/Bcl2a1d/Ptpn2/Cd40/Fcgr2b/Clec4d/Plscr1/Clec4e/Icosl/Braf/C3ar1/Ptprj/Fpr2/Nr4a3/Fyb/Bcar1/Malt1/Cd38	21
GO:0031349	positive regulation of defense response	25/490	179/11002	3.48901e-07	3.48901e-07	1.37097e-05	Ptger4/Tlr2/Ldlr/Gbp5/Nectin2/Il12b/Ccl5/Tlr8/Irgm1/Ulbp1/Hexim1/Ccl3/Tnip1/Nod2/Il18rap/Zc3hav1/Optn/Plscr1/Ikbke/Irgm2/Adora2b/Fpr2/Pspc1/Jak2/Nupr1	25
GO:0002292	T cell differentiation involved in immune response	13/490	53/11002	3.79443e-07	3.79443e-07	1.47302e-05	Ptger4/Batf/Relb/Il12b/Sema4a/Hlx/Clec4d/Clec4e/Bcl6/Nlrp3/Malt1/Il27/Prkcz	13
GO:0002460	adaptive immune response based on somatic recombination of immune receptors built from immunoglobulin superfamily domains	27/490	206/11002	4.37595e-07	4.37595e-07	1.67854e-05	Nfkb2/Batf/Nectin2/Relb/Il12b/Cd274/Trex1/Tnfaip3/Sema4a/Hlx/Ulbp1/Cd40/Fcgr2b/Nod2/Il18rap/Adam17/Stx11/Icosl/C3ar1/Hspa8/Bcl6/Nlrp3/Malt1/Il27/Prkcz/Il27ra/C1rl	27
GO:0048245	eosinophil chemotaxis	7/490	13/11002	4.52618e-07	4.52618e-07	1.71574e-05	Ccl12/Ccl2/Ccl22/Ccl4/Ccl9/Ccl5/Ccl7	7
GO:0002688	regulation of leukocyte chemotaxis	15/490	72/11002	4.81227e-07	4.81227e-07	1.80298e-05	Ccl12/Cxcl10/Csf1/Ccl2/Ccl4/Ccl5/Gpr18/Nod2/Adam17/C3ar1/Ptprj/Fpr2/Edn1/Ccr1/Rac2	15
GO:0002764	immune response-regulating signaling pathway	21/490	135/11002	5.01002e-07	5.01002e-07	1.8555e-05	Tlr2/Pde4b/Nectin2/Lcp2/Bcl2a1d/Ptpn2/Cd40/Fcgr2b/Clec4d/Plscr1/Clec4e/Icosl/Braf/C3ar1/Ptprj/Fpr2/Nr4a3/Fyb/Bcar1/Malt1/Cd38	21
GO:0050801	ion homeostasis	44/490	446/11002	5.36912e-07	5.36912e-07	1.96589e-05	Cxcl10/Slc39a14/Ptger4/Ccrl2/Gpr35/Ccl2/P2ry2/Herpud1/Clic4/Fth1/Ccl5/Slc11a2/Snx10/Slc31a1/Atp6v0c/Gpr18/Anpep/Ccl3/Slc7a11/Cd40/Mllt6/Hif1a/Synpo/Sod2/Lcn2/Hmox1/Src/Diaph1/Slc30a4/Smad4/Anxa6/Atp6v0a1/Cdh5/Slc12a4/Atp1a1/C3ar1/Sri/Fpr2/Edn1/Ccr1/Jak2/Cd38/Trpm2/Slc4a3	44
GO:0050707	regulation of cytokine secretion	21/490	137/11002	6.44006e-07	6.44006e-07	2.33152e-05	Ptger4/Tlr2/Cd244a/Cd14/Cd274/Tnfaip3/Ifih1/Tlr8/Tlr1/Ncl/Ccl3/Socs1/Nod2/Src/Panx1/Clec4e/Ifnar1/Nlrp3/Prkcz/Il27ra/Tnfrsf4	21
GO:0055065	metal ion homeostasis	38/490	364/11002	8.28661e-07	8.28661e-07	2.9667e-05	Cxcl10/Slc39a14/Ptger4/Ccrl2/Gpr35/Ccl2/P2ry2/Herpud1/Fth1/Ccl5/Slc11a2/Snx10/Slc31a1/Gpr18/Anpep/Ccl3/Cd40/Mllt6/Hif1a/Synpo/Sod2/Lcn2/Hmox1/Diaph1/Slc30a4/Smad4/Anxa6/Cdh5/Slc12a4/Atp1a1/C3ar1/Sri/Fpr2/Edn1/Ccr1/Jak2/Cd38/Trpm2	38
GO:0002366	leukocyte activation involved in immune response	25/490	188/11002	8.93241e-07	8.93241e-07	3.16277e-05	Ptger4/Cd244a/Batf/Relb/Il12b/Trex1/Tnfaip3/Sema4a/Hlx/Cd40/Clec4d/Hmox1/Clec4e/Stx11/Icosl/Adora2b/Bcl6/Nr4a3/Nlrp3/Rac2/Ptafr/Malt1/Il27/Prkcz/Il27ra	25
GO:0051251	positive regulation of lymphocyte activation	25/490	190/11002	1.09073e-06	1.09073e-06	3.82004e-05	Cd244a/Cdkn1a/Tnip2/Ccl2/Vcam1/Il12b/Cd274/Ccl5/Tnfsf9/Hlx/Ulbp1/Mmp14/Cd40/Il15ra/Socs1/Nod2/Cd86/Icosl/Bcl6/Nlrp3/Pik3r6/Malt1/Cd38/Prkcz/Tnfrsf4	25
GO:0071356	cellular response to tumor necrosis factor	18/490	108/11002	1.17137e-06	1.17137e-06	4.05837e-05	Ccl12/Acod1/Birc3/Ccl2/Ccl22/Ccl4/Ccl9/Ccl5/Tank/Ptpn2/Nfe2l2/Actr3/Ccl3/Adam17/Traf3/Nfkb1/Ccl7/Jak2	18
GO:0002224	toll-like receptor signaling pathway	16/490	87/11002	1.19036e-06	1.19036e-06	4.08027e-05	Acod1/Tlr2/Tnip2/Cd14/Tnip3/Trim30a/Mapkapk2/Tnfaip3/Tlr8/Tlr1/Tnip1/Nod2/Traf3/Cd86/Mfhas1/Irak3	16
GO:0002683	negative regulation of immune system process	33/490	299/11002	1.30867e-06	1.30867e-06	4.4386e-05	Ccl12/Acod1/Ptger4/Ldlr/Sdc4/Il12b/Cd274/Samsn1/Trex1/Tnfaip3/Parp14/Hlx/Ptpn2/Nfe2l2/Cdk6/Gpr18/Clec2d/Paf1/Zbtb46/Fcgr2b/Socs1/Hmox1/Nod2/Cd86/Bcl6/Ptprj/Ccr1/Nme2/Irak3/Zc3h12d/Il27ra/Tnfrsf4/Fcrlb	33
GO:0002263	cell activation involved in immune response	25/490	192/11002	1.32766e-06	1.32766e-06	4.45612e-05	Ptger4/Cd244a/Batf/Relb/Il12b/Trex1/Tnfaip3/Sema4a/Hlx/Cd40/Clec4d/Hmox1/Clec4e/Stx11/Icosl/Adora2b/Bcl6/Nr4a3/Nlrp3/Rac2/Ptafr/Malt1/Il27/Prkcz/Il27ra	25
GO:0030003	cellular cation homeostasis	37/490	357/11002	1.38399e-06	1.38399e-06	4.59727e-05	Cxcl10/Slc39a14/Ptger4/Ccrl2/Gpr35/Ccl2/P2ry2/Herpud1/Clic4/Fth1/Ccl5/Slc11a2/Slc31a1/Atp6v0c/Gpr18/Ccl3/Cd40/Hif1a/Synpo/Lcn2/Hmox1/Diaph1/Slc30a4/Smad4/Anxa6/Atp6v0a1/Cdh5/Atp1a1/C3ar1/Sri/Fpr2/Edn1/Ccr1/Jak2/Cd38/Trpm2/Slc4a3	37
GO:0050727	regulation of inflammatory response	27/490	220/11002	1.62296e-06	1.62296e-06	5.33608e-05	Acod1/Ptger4/Tlr2/Ldlr/Gbp5/Hgf/Il12b/Ccl5/Trex1/Tnfaip3/Ptpn2/Mefv/Ccl3/Fcgr2b/Tnip1/Nod2/Nfkb1/Mfhas1/Cdh5/Adora2b/Bcl6/Fpr2/Nlrp3/Nos2/Jak2/Fancd2/Nupr1	27
GO:0043367	CD4-positive, alpha-beta T cell differentiation	13/490	60/11002	1.7505e-06	1.7505e-06	5.69728e-05	Ptger4/Batf/Relb/Il12b/Sema4a/Hlx/Socs1/Braf/Bcl6/Nlrp3/Malt1/Il27/Prkcz	13
GO:0002286	T cell activation involved in immune response	14/490	70/11002	1.9504e-06	1.9504e-06	6.22845e-05	Ptger4/Batf/Relb/Il12b/Sema4a/Hlx/Clec4d/Clec4e/Stx11/Bcl6/Nlrp3/Malt1/Il27/Prkcz	14
GO:0070374	positive regulation of ERK1 and ERK2 cascade	19/490	123/11002	1.95237e-06	1.95237e-06	6.22845e-05	Ccl12/Tlr2/Ccl2/Ccl22/Ccl4/Ccl9/Ccl5/Glipr2/Ccl3/Nod2/Src/Adam17/Mfhas1/Braf/Pdgfa/Fpr2/Ccr1/Ccl7/Prkcz	19
GO:0006873	cellular ion homeostasis	37/490	363/11002	2.06432e-06	2.06432e-06	6.52104e-05	Cxcl10/Slc39a14/Ptger4/Ccrl2/Gpr35/Ccl2/P2ry2/Herpud1/Clic4/Fth1/Ccl5/Slc11a2/Slc31a1/Atp6v0c/Gpr18/Ccl3/Cd40/Hif1a/Synpo/Lcn2/Hmox1/Diaph1/Slc30a4/Smad4/Anxa6/Atp6v0a1/Cdh5/Atp1a1/C3ar1/Sri/Fpr2/Edn1/Ccr1/Jak2/Cd38/Trpm2/Slc4a3	37
GO:0042742	defense response to bacterium	19/490	124/11002	2.21218e-06	2.21218e-06	6.92026e-05	Tlr2/Gbp3/Gbp2/Il12b/Hck/Tnfaip8/Vgf/Clec4d/Lcn2/Nod2/Adam17/Optn/Clec4e/Irgm2/Fpr2/Nlrp3/Nos2/Il27ra/Gbp2b	19
GO:0050715	positive regulation of cytokine secretion	17/490	102/11002	2.31947e-06	2.31947e-06	7.15599e-05	Ptger4/Tlr2/Cd244a/Cd14/Cd274/Ifih1/Tlr8/Tlr1/Ncl/Ccl3/Nod2/Src/Panx1/Clec4e/Ifnar1/Nlrp3/Prkcz	17
GO:0032609	interferon-gamma production	14/490	71/11002	2.33195e-06	2.33195e-06	7.15599e-05	Cd244a/Pde4b/Cd14/Il12b/Cd274/Rnf19b/Tnfsf9/Tlr8/Ulbp1/Nod2/Il18rap/Ifnar1/Il27/Il27ra	14
GO:0032635	interleukin-6 production	18/490	114/11002	2.62967e-06	2.62967e-06	7.99348e-05	Tlr2/Il1rn/Hgf/Trim30a/Mapkapk2/Tnfaip3/Ifih1/Tnfsf9/Tlr8/Tlr1/Ncl/Nod2/Il18rap/Adora2b/Nos2/Ptafr/Irak3/Il27ra	18
GO:0045089	positive regulation of innate immune response	15/490	82/11002	2.75231e-06	2.75231e-06	8.24104e-05	Tlr2/Gbp5/Nectin2/Il12b/Tlr8/Irgm1/Ulbp1/Hexim1/Nod2/Il18rap/Plscr1/Ikbke/Irgm2/Fpr2/Pspc1	15
GO:0007186	G protein-coupled receptor signaling pathway	32/490	295/11002	2.76227e-06	2.76227e-06	8.24104e-05	Hcar2/Ccl12/Cxcl10/Ptger4/Ccrl2/Gpr35/Ccl2/Pde4b/Ccl22/P2ry2/Ccl4/Ccl9/Ccl5/Pik3r5/Gpr18/Plek/Ccl3/Igf2r/Src/C3ar1/Adora2b/Fpr2/Edn1/Ccr1/Spns2/Bcar1/Rac2/Pik3r6/Ccl7/Ptafr/Jak2/Nme2	32
GO:0030155	regulation of cell adhesion	42/490	444/11002	2.94052e-06	2.94052e-06	8.69235e-05	Ptger4/Cd244a/Sdc4/Spp1/Csf1/Il1rn/Ccl2/Vcam1/Itga5/Il12b/Emilin2/Cd274/Ccl5/Adam9/Tnfaip3/Tnfsf9/Hlx/Ptpn2/Ppm1f/Dab2/Cdk6/Mmp14/Socs1/Iqgap1/Src/Cd86/Icosl/Braf/Bcl6/Ptprj/Nr4a3/Nlrp3/Bcar1/Rac2/Pik3r6/Ptafr/Malt1/Jak2/Zc3h12d/Prkcz/Lama5/Plxna1	42
GO:0043408	regulation of MAPK cascade	43/490	460/11002	3.03839e-06	3.03839e-06	8.90003e-05	Ccl12/Tlr2/Il1rn/Ccl2/Ccl22/Hgf/Rnf149/Ccl4/Ccl9/Lmnb1/Ccl5/Pik3r5/Adam9/Trib3/Hipk3/Ptpn2/Dab2/Glipr2/Ccl3/Cd40/Fcgr2b/Tnip1/Stk40/Iqgap1/Nod2/Src/Adam17/Dnaja1/Smad4/Mfhas1/Braf/Pdgfa/Ptprj/Fpr2/Edn1/Foxo1/Ccr1/Pik3r6/Ccl7/Jak2/Irak3/Nup62/Prkcz	43
GO:0002253	activation of immune response	23/490	176/11002	3.30795e-06	3.30795e-06	9.60231e-05	Tlr2/Pde4b/Nectin2/Lcp2/Trex1/Bcl2a1d/Ptpn2/Hexim1/Fcgr2b/Nod2/Plscr1/Icosl/Braf/C3ar1/Ptprj/Fpr2/Nr4a3/Fyb/Bcar1/Malt1/Pspc1/Cd38/C1rl	23
GO:1902105	regulation of leukocyte differentiation	25/490	203/11002	3.70992e-06	3.70992e-06	0.00010673	Csf1/Il12b/Ccl5/Tnfsf9/Hlx/Ptpn2/Cdk6/Clec2d/Mmp14/Ccl3/Zbtb46/Il15ra/Socs1/Braf/Bcl6/Cd101/Zeb1/Ccr1/Nlrp3/Pik3r6/Malt1/Nme2/Il27/Prkcz/Fancd2	25
GO:0035710	CD4-positive, alpha-beta T cell activation	14/490	74/11002	3.90685e-06	3.90685e-06	0.000111401	Ptger4/Batf/Relb/Il12b/Cd274/Sema4a/Hlx/Socs1/Braf/Bcl6/Nlrp3/Malt1/Il27/Prkcz	14
GO:0050777	negative regulation of immune response	17/490	106/11002	4.00144e-06	4.00144e-06	0.000113097	Acod1/Il12b/Samsn1/Trex1/Tnfaip3/Parp14/Hlx/Ptpn2/Clec2d/Fcgr2b/Hmox1/Nod2/Bcl6/Ccr1/Irak3/Il27ra/Fcrlb	17
GO:0035690	cellular response to drug	28/490	245/11002	4.28981e-06	4.28981e-06	0.00011926	Acod1/Pde4b/Hgf/Rnf149/Ccl4/Cd69/Trex1/Slc31a1/Tnfaip3/Nfe2l2/Ppm1f/Ahr/Rest/Lcn2/Hmox1/Nod2/Src/Nfkb1/Daxx/Braf/Eif4ebp1/Nr4a3/Foxo1/Nos2/Bcar1/Ccl7/Jak2/Trpm2	28
GO:0050701	interleukin-1 secretion	10/490	38/11002	4.29351e-06	4.29351e-06	0.00011926	Ptger4/Tlr2/Gbp5/Tnfaip3/Tlr8/Ccl3/Nod2/Panx1/Ifnar1/Nlrp3	10
GO:0030217	T cell differentiation	24/490	192/11002	4.46896e-06	4.46896e-06	0.000123072	Ptger4/Batf/Relb/Il12b/Sema4a/Tnfsf9/Hlx/Bcl2a1d/Ptpn2/Cdk6/Gpr18/Clec4d/Socs1/Adam17/Clec4e/Braf/Bcl6/Zeb1/Nlrp3/Pik3r6/Malt1/Il27/Prkcz/Fancd2	24
GO:0032611	interleukin-1 beta production	13/490	65/11002	4.53648e-06	4.53648e-06	0.000123873	Tlr2/Gbp5/Tnfaip8/Tnfaip3/Tlr8/Mefv/Ccl3/Nod2/Panx1/Ifnar1/Nlrp3/Malt1/Jak2	13
GO:0032612	interleukin-1 production	14/490	75/11002	4.61086e-06	4.61086e-06	0.000124846	Ptger4/Tlr2/Gbp5/Tnfaip8/Tnfaip3/Tlr8/Mefv/Ccl3/Nod2/Panx1/Ifnar1/Nlrp3/Malt1/Jak2	14
GO:0062012	regulation of small molecule metabolic process	26/490	219/11002	4.70648e-06	4.70648e-06	0.000126373	Fabp5/Ptger4/Ldlr/Cd244a/Sik1/Trex1/Trib3/Ptpn2/Ranbp2/Dab2/Plek/Sesn2/Slc7a11/Hif1a/Rest/Src/Nfkb1/Adora2b/Nr4a3/Slc7a7/Foxo1/Eif6/Nos2/Ptafr/Stard4/Nupr1	26
GO:0070372	regulation of ERK1 and ERK2 cascade	23/490	180/11002	4.86455e-06	4.86455e-06	0.000126826	Ccl12/Tlr2/Ccl2/Ccl22/Ccl4/Ccl9/Ccl5/Ptpn2/Dab2/Glipr2/Ccl3/Tnip1/Nod2/Src/Adam17/Smad4/Mfhas1/Braf/Pdgfa/Fpr2/Ccr1/Ccl7/Prkcz	23
GO:0070371	ERK1 and ERK2 cascade	24/490	193/11002	4.89583e-06	4.89583e-06	0.000126826	Ccl12/Ptger4/Tlr2/Ccl2/Ccl22/Ccl4/Ccl9/Ccl5/Ptpn2/Dab2/Glipr2/Ccl3/Tnip1/Nod2/Src/Adam17/Smad4/Mfhas1/Braf/Pdgfa/Fpr2/Ccr1/Ccl7/Prkcz	24
GO:0002293	alpha-beta T cell differentiation involved in immune response	11/490	47/11002	4.95677e-06	4.95677e-06	0.000126826	Ptger4/Batf/Relb/Il12b/Sema4a/Hlx/Bcl6/Nlrp3/Malt1/Il27/Prkcz	11
GO:0002294	CD4-positive, alpha-beta T cell differentiation involved in immune response	11/490	47/11002	4.95677e-06	4.95677e-06	0.000126826	Ptger4/Batf/Relb/Il12b/Sema4a/Hlx/Bcl6/Nlrp3/Malt1/Il27/Prkcz	11
GO:0042093	T-helper cell differentiation	11/490	47/11002	4.95677e-06	4.95677e-06	0.000126826	Ptger4/Batf/Relb/Il12b/Sema4a/Hlx/Bcl6/Nlrp3/Malt1/Il27/Prkcz	11
GO:0002690	positive regulation of leukocyte chemotaxis	12/490	56/11002	4.9595e-06	4.9595e-06	0.000126826	Cxcl10/Csf1/Ccl2/Ccl4/Ccl5/Adam17/C3ar1/Ptprj/Fpr2/Edn1/Ccr1/Rac2	12
GO:0050863	regulation of T cell activation	25/490	207/11002	5.27794e-06	5.27794e-06	0.000133906	Cd244a/Sdc4/Ccl2/Vcam1/Il12b/Cd274/Ccl5/Trex1/Tnfsf9/Hlx/Ptpn2/Socs1/Cd86/Icosl/Braf/Bcl6/Zeb1/Nlrp3/Rac2/Pik3r6/Malt1/Il27/Zc3h12d/Prkcz/Fancd2	25
GO:0006875	cellular metal ion homeostasis	33/490	319/11002	5.42722e-06	5.42722e-06	0.000136618	Cxcl10/Slc39a14/Ptger4/Ccrl2/Gpr35/Ccl2/P2ry2/Herpud1/Fth1/Ccl5/Slc11a2/Slc31a1/Gpr18/Ccl3/Cd40/Hif1a/Synpo/Lcn2/Hmox1/Diaph1/Slc30a4/Smad4/Anxa6/Cdh5/Atp1a1/C3ar1/Sri/Fpr2/Edn1/Ccr1/Jak2/Cd38/Trpm2	33
GO:0030098	lymphocyte differentiation	29/490	262/11002	5.47329e-06	5.47329e-06	0.000136709	Ptger4/Batf/Relb/Il12b/Tnfaip3/Sema4a/Tnfsf9/Hlx/Bcl2a1d/Ptpn2/Cdk6/Gpr18/Mmp14/Ahr/Il15ra/Clec4d/Socs1/Adam17/Clec4e/Braf/Bcl6/Ptprj/Zeb1/Nlrp3/Pik3r6/Malt1/Il27/Prkcz/Fancd2	29
GO:0002285	lymphocyte activation involved in immune response	19/490	132/11002	5.71743e-06	5.71743e-06	0.00014064	Ptger4/Cd244a/Batf/Relb/Il12b/Tnfaip3/Sema4a/Hlx/Cd40/Clec4d/Clec4e/Stx11/Icosl/Bcl6/Nlrp3/Malt1/Il27/Prkcz/Il27ra	19
GO:0042092	type 2 immune response	8/490	24/11002	5.71797e-06	5.71797e-06	0.00014064	Batf/Hlx/Nod2/Bcl6/Nlrp3/Ecm1/Prkcz/Il27ra	8
GO:0002287	alpha-beta T cell activation involved in immune response	11/490	48/11002	6.17572e-06	6.17572e-06	0.000150749	Ptger4/Batf/Relb/Il12b/Sema4a/Hlx/Bcl6/Nlrp3/Malt1/Il27/Prkcz	11
GO:1903706	regulation of hemopoiesis	30/490	278/11002	6.30245e-06	6.30245e-06	0.000152531	Csf1/Il12b/Ccl5/Tnfsf9/Hlx/Ptpn2/Nfe2l2/Cdk6/Clec2d/Mmp14/Paf1/Ccl3/Zbtb46/Acvr1b/Il15ra/Hif1a/Socs1/Braf/Bcl6/Cd101/Zeb1/Ccr1/Nlrp3/Eif6/Pik3r6/Malt1/Nme2/Il27/Prkcz/Fancd2	30
GO:0002699	positive regulation of immune effector process	22/490	170/11002	6.3434e-06	6.3434e-06	0.000152531	Tlr2/Cd244a/Ccl2/Nectin2/Il12b/Hlx/Ulbp1/Cd40/Hmox1/Nod2/Il18rap/Zc3hav1/Hspa8/Adora2b/Ptprj/Nr4a3/Nlrp3/Rac2/Ptafr/Malt1/Prkcz/Tnfrsf4	22
GO:0050704	regulation of interleukin-1 secretion	9/490	32/11002	7.17853e-06	7.17853e-06	0.000171333	Ptger4/Tlr2/Tnfaip3/Tlr8/Ccl3/Nod2/Panx1/Ifnar1/Nlrp3	9
GO:0002443	leukocyte mediated immunity	28/490	252/11002	7.38816e-06	7.38816e-06	0.00017504	Tlr2/Batf/Ccl2/Nectin2/Il12b/Rnf19b/Trex1/Ulbp1/Clec2d/Cd40/Fcgr2b/Hmox1/Nod2/Il18rap/Stx11/Icosl/Hspa8/Adora2b/Bcl6/Nr4a3/Nlrp3/Rac2/Pik3r6/Ptafr/Malt1/Prkcz/Il27ra/C1rl	28
GO:0032760	positive regulation of tumor necrosis factor production	14/490	78/11002	7.44659e-06	7.44659e-06	0.000175137	Tlr2/Ccl2/Cd14/Il12b/Ccl4/Mapkapk2/Ifih1/Tlr1/Ncl/Ccl3/Nod2/Ptprj/Ptafr/Jak2	14
GO:0070663	regulation of leukocyte proliferation	21/490	160/11002	8.23318e-06	8.23318e-06	0.000192233	Ccl12/Cd244a/Cdkn1a/Sdc4/Csf1/Vcam1/Il12b/Cd274/Ccl5/Tnfsf9/Ahr/Cd40/Fcgr2b/Cd86/Icosl/Bcl6/Rac2/Il27/Cd38/Zc3h12d/Tnfrsf4	21
GO:0031348	negative regulation of defense response	20/490	148/11002	8.66257e-06	8.66257e-06	0.000199949	Acod1/Ptger4/Ldlr/Hgf/Il12b/Trex1/Tnfaip3/Parp14/Ptpn2/Mefv/Clec2d/Fcgr2b/Nod2/Nfkb1/Mfhas1/Cdh5/Fpr2/Ccr1/Nlrp3/Irak3	20
GO:1903557	positive regulation of tumor necrosis factor superfamily cytokine production	14/490	79/11002	8.68775e-06	8.68775e-06	0.000199949	Tlr2/Ccl2/Cd14/Il12b/Ccl4/Mapkapk2/Ifih1/Tlr1/Ncl/Ccl3/Nod2/Ptprj/Ptafr/Jak2	14
GO:0098609	cell-cell adhesion	39/490	419/11002	9.84834e-06	9.84834e-06	0.000225052	Cd244a/Sdc4/Lrrc4/Il1rn/Ccl2/Nectin2/Vcam1/Itga5/Il12b/Cd274/Ccl5/Tnfaip3/Tnfsf9/Hlx/Ptpn2/Ppm1f/Plek/Slc7a11/Tnip1/Socs1/Src/Cd86/Cdh5/Icosl/Bcl6/Nr4a3/Nlrp3/Rac2/Pik3r6/Ntn1/Ptafr/Malt1/Jak2/Jaml/Zc3h12d/Prkcz/Itga2b/Lama5/Nectin1	39
GO:0002429	immune response-activating cell surface receptor signaling pathway	18/490	125/11002	9.99178e-06	9.99178e-06	0.000226722	Tlr2/Pde4b/Nectin2/Lcp2/Bcl2a1d/Ptpn2/Fcgr2b/Plscr1/Icosl/Braf/C3ar1/Ptprj/Fpr2/Nr4a3/Fyb/Bcar1/Malt1/Cd38	18
GO:0046632	alpha-beta T cell differentiation	14/490	80/11002	1.01086e-05	1.01086e-05	0.00022777	Ptger4/Batf/Relb/Il12b/Sema4a/Hlx/Gpr18/Socs1/Braf/Bcl6/Nlrp3/Malt1/Il27/Prkcz	14
GO:0002757	immune response-activating signal transduction	18/490	126/11002	1.11858e-05	1.11858e-05	0.00025029	Tlr2/Pde4b/Nectin2/Lcp2/Bcl2a1d/Ptpn2/Fcgr2b/Plscr1/Icosl/Braf/C3ar1/Ptprj/Fpr2/Nr4a3/Fyb/Bcar1/Malt1/Cd38	18
GO:0035456	response to interferon-beta	11/490	51/11002	1.15318e-05	1.15318e-05	0.000256252	Acod1/Gbp3/Gbp2/Trex1/Irgm1/Igtp/Plscr1/Ikbke/Irgm2/Pnpt1/Gbp2b	11
GO:0002440	production of molecular mediator of immune response	20/490	152/11002	1.29856e-05	1.29856e-05	0.000286582	Tlr2/Cd244a/Batf/Il12b/Trex1/Tnfaip3/Cd40/Fcgr2b/Hmox1/Nod2/Il18rap/Icosl/Bcl6/Nr4a3/Nlrp3/Malt1/Irak3/Prkcz/Il27ra/Tnfrsf4	20
GO:0002700	regulation of production of molecular mediator of immune response	16/490	104/11002	1.32501e-05	1.32501e-05	0.00029043	Tlr2/Cd244a/Trex1/Tnfaip3/Cd40/Fcgr2b/Hmox1/Nod2/Bcl6/Nr4a3/Nlrp3/Malt1/Irak3/Prkcz/Il27ra/Tnfrsf4	16
GO:0043410	positive regulation of MAPK cascade	32/490	319/11002	1.42219e-05	1.42219e-05	0.000309625	Ccl12/Tlr2/Il1rn/Ccl2/Ccl22/Hgf/Ccl4/Ccl9/Lmnb1/Ccl5/Pik3r5/Adam9/Dab2/Glipr2/Ccl3/Cd40/Fcgr2b/Iqgap1/Nod2/Src/Adam17/Mfhas1/Braf/Pdgfa/Ptprj/Fpr2/Edn1/Ccr1/Pik3r6/Ccl7/Jak2/Prkcz	32
GO:0032944	regulation of mononuclear cell proliferation	20/490	153/11002	1.43327e-05	1.43327e-05	0.000309944	Cd244a/Cdkn1a/Sdc4/Csf1/Vcam1/Il12b/Cd274/Ccl5/Tnfsf9/Ahr/Cd40/Fcgr2b/Cd86/Icosl/Bcl6/Rac2/Il27/Cd38/Zc3h12d/Tnfrsf4	20
GO:0002828	regulation of type 2 immune response	7/490	20/11002	1.55631e-05	1.55631e-05	0.000332339	Hlx/Nod2/Bcl6/Nlrp3/Ecm1/Prkcz/Il27ra	7
GO:0051090	regulation of DNA-binding transcription factor activity	30/490	291/11002	1.55746e-05	1.55746e-05	0.000332339	Acod1/Tlr2/Sik1/Bhlhe40/Hck/Tnfaip3/Ifrd1/Traf1/Cd40/Fcgr2b/Lrrfip1/Hmox1/Nod2/Il18rap/Traf3/Sumo1/Crtc2/Sri/Nfkbib/Edn1/Nlrp3/Sav1/Malt1/Jak2/Irak3/Prkcz/Fancd2/Id3/Tnfrsf4/Nupr1	30
GO:0050702	interleukin-1 beta secretion	9/490	35/11002	1.60359e-05	1.60359e-05	0.000339931	Tlr2/Gbp5/Tnfaip3/Tlr8/Ccl3/Nod2/Panx1/Ifnar1/Nlrp3	9
GO:0009615	response to virus	24/490	207/11002	1.63203e-05	1.63203e-05	0.000341467	Cxcl10/Il12b/Trim30a/Ccl5/Trex1/Stat2/Ifih1/Tlr8/Slfn8/G3bp1/Apobec3/Cd40/Lcn2/Zc3hav1/Traf3/Plscr1/Cd86/Ikbke/Irgm2/Ifnar1/Nlrp3/Irak3/Il27/Gbp2b	24
GO:0070661	leukocyte proliferation	24/490	207/11002	1.63203e-05	1.63203e-05	0.000341467	Ccl12/Cd244a/Cdkn1a/Sdc4/Csf1/Vcam1/Il12b/Cd274/Ccl5/Tnfsf9/Ahr/Cd40/Fcgr2b/Impdh2/Cd86/Ebi3/Icosl/Bcl6/Rac2/Malt1/Il27/Cd38/Zc3h12d/Tnfrsf4	24
GO:0051222	positive regulation of protein transport	31/490	307/11002	1.70053e-05	1.70053e-05	0.000353502	Hcar2/Prr5l/Ptger4/Tlr2/Cd244a/Ccl2/Cd14/Cd274/Adam9/Plk3/Ifih1/Tlr8/Tlr1/Ncl/Nadk/Actr3/Ccl3/Mmp13/Hif1a/Nod2/Src/Panx1/Clec4e/Ifnar1/Sri/Nlrp3/Jak2/Cd38/Trpm2/Prkcz/Tnfrsf4	31
GO:0050920	regulation of chemotaxis	18/490	130/11002	1.7345e-05	1.7345e-05	0.000356971	Ccl12/Cxcl10/Csf1/Ccl2/Ccl4/Ccl5/Sema4a/Ptpn2/Ppm1f/Gpr18/Nod2/Adam17/C3ar1/Ptprj/Fpr2/Edn1/Ccr1/Rac2	18
GO:0042493	response to drug	43/490	493/11002	1.73937e-05	1.73937e-05	0.000356971	Acod1/Ptger4/Pde4b/Hgf/Rnf149/Slc7a1/Ccl4/Cd69/Trex1/Adam9/Slc31a1/Tnfaip3/Nfkbie/Nfe2l2/Ppm1f/Cdk6/Ahr/Slc7a11/Sod2/Rest/Lcn2/Hmox1/Nod2/Src/Adam17/Panx1/Nfkb1/Daxx/Slc7a5/Braf/Atp1a1/Eif4ebp1/Nr4a3/Edn1/Foxo1/Rad54l/Nos2/Bcar1/Ccl7/Jak2/Cd38/Trpm2/Slc25a10	43
GO:0050728	negative regulation of inflammatory response	15/490	95/11002	1.78801e-05	1.78801e-05	0.00036463	Acod1/Ptger4/Ldlr/Hgf/Il12b/Tnfaip3/Ptpn2/Mefv/Fcgr2b/Nod2/Nfkb1/Mfhas1/Cdh5/Fpr2/Nlrp3	15
GO:0032943	mononuclear cell proliferation	23/490	195/11002	1.85011e-05	1.85011e-05	0.000374921	Cd244a/Cdkn1a/Sdc4/Csf1/Vcam1/Il12b/Cd274/Ccl5/Tnfsf9/Ahr/Cd40/Fcgr2b/Impdh2/Cd86/Ebi3/Icosl/Bcl6/Rac2/Malt1/Il27/Cd38/Zc3h12d/Tnfrsf4	23
GO:0032675	regulation of interleukin-6 production	16/490	107/11002	1.91376e-05	1.91376e-05	0.000385396	Tlr2/Il1rn/Hgf/Trim30a/Mapkapk2/Tnfaip3/Ifih1/Tnfsf9/Tlr8/Tlr1/Ncl/Nod2/Adora2b/Ptafr/Irak3/Il27ra	16
GO:0009725	response to hormone	38/490	416/11002	1.96475e-05	1.96475e-05	0.000393207	Acod1/Ptger4/Spp1/Il1rn/Gm9847/Adam9/Trib3/Stat2/Ptpn2/Dab2/Vgf/Sesn2/Mmp14/Gatm/Mmp13/Eprs/Rab8b/Hpn/Socs1/Serpina3f/Rest/Src/Dnaja1/Nfkb1/Daxx/Braf/Atp1a1/Zfp106/Eif4ebp1/Nr4a3/Foxo1/Eif6/Nos2/Bcar1/Jak2/Cd38/Prkcz/Serpina3g	38
GO:0032649	regulation of interferon-gamma production	12/490	64/11002	2.1084e-05	2.1084e-05	0.000417914	Cd244a/Pde4b/Cd14/Il12b/Cd274/Tnfsf9/Tlr8/Ulbp1/Nod2/Ifnar1/Il27/Il27ra	12
GO:0002703	regulation of leukocyte mediated immunity	21/490	170/11002	2.11415e-05	2.11415e-05	0.000417914	Tlr2/Ccl2/Nectin2/Il12b/Ulbp1/Clec2d/Cd40/Fcgr2b/Hmox1/Nod2/Il18rap/Hspa8/Adora2b/Bcl6/Nlrp3/Rac2/Pik3r6/Ptafr/Malt1/Prkcz/Il27ra	21
GO:1902107	positive regulation of leukocyte differentiation	17/490	120/11002	2.18648e-05	2.18648e-05	0.000427242	Csf1/Il12b/Ccl5/Tnfsf9/Hlx/Mmp14/Ccl3/Zbtb46/Il15ra/Socs1/Bcl6/Cd101/Ccr1/Nlrp3/Pik3r6/Malt1/Prkcz	17
GO:1905517	macrophage migration	10/490	45/11002	2.18785e-05	2.18785e-05	0.000427242	Ccl12/Csf1/Gpr35/Ccl2/Ccl5/Mmp14/Ccl3/C3ar1/Ptprj/Mcoln2	10
GO:0034134	toll-like receptor 2 signaling pathway	6/490	15/11002	2.68621e-05	2.68621e-05	0.000518279	Acod1/Tlr2/Tnip2/Tlr1/Nod2/Mfhas1	6
GO:0060333	interferon-gamma-mediated signaling pathway	6/490	15/11002	2.68621e-05	2.68621e-05	0.000518279	Parp14/Ptpn2/Irgm1/Socs1/Irgm2/Jak2	6
GO:0001818	negative regulation of cytokine production	21/490	173/11002	2.75955e-05	2.75955e-05	0.000526128	Acod1/Ptger4/Tlr2/Hgf/Relb/Il12b/Cd274/Trim30a/Tnfaip3/Tlr8/Gpr18/Mefv/Fcgr2b/Hmox1/Nod2/Nfkb1/Bcl6/Nlrp3/Irak3/Il27ra/Tnfrsf4	21
GO:0050730	regulation of peptidyl-tyrosine phosphorylation	21/490	173/11002	2.75955e-05	2.75955e-05	0.000526128	Ptger4/Hgf/Itga5/Il12b/Ccl5/Samsn1/Parp14/Mvp/Ptpn2/Rap2c/Cd40/Socs1/Iqgap1/Nod2/Src/Adam17/Ifnar1/Pdgfa/Ptprj/Jak2/Prkcz	21
GO:1901652	response to peptide	28/490	271/11002	2.87169e-05	2.87169e-05	0.000544287	Gm9847/Vcam1/Trib3/Tnfaip3/Stat2/Ptpn2/Vgf/Sesn2/Gatm/Eprs/Fcgr2b/Rab8b/Socs1/Serpina3f/Nod2/Src/Nfkb1/Braf/Zfp106/Eif4ebp1/Fpr2/Nr4a3/Foxo1/Eif6/Bcar1/Jak2/Prkcz/Serpina3g	28
GO:0032652	regulation of interleukin-1 production	12/490	66/11002	2.91433e-05	2.91433e-05	0.000549139	Ptger4/Tlr2/Tnfaip3/Tlr8/Mefv/Ccl3/Nod2/Panx1/Ifnar1/Nlrp3/Malt1/Jak2	12
GO:1903708	positive regulation of hemopoiesis	19/490	148/11002	3.02621e-05	3.02621e-05	0.000566905	Csf1/Il12b/Ccl5/Tnfsf9/Hlx/Mmp14/Ccl3/Zbtb46/Acvr1b/Il15ra/Hif1a/Socs1/Bcl6/Cd101/Ccr1/Nlrp3/Pik3r6/Malt1/Prkcz	19
GO:0007159	leukocyte cell-cell adhesion	24/490	215/11002	3.06883e-05	3.06883e-05	0.000571565	Cd244a/Sdc4/Ccl2/Vcam1/Itga5/Il12b/Cd274/Ccl5/Tnfsf9/Hlx/Ptpn2/Tnip1/Socs1/Cd86/Icosl/Bcl6/Nr4a3/Nlrp3/Rac2/Pik3r6/Ptafr/Malt1/Zc3h12d/Prkcz	24
GO:0030029	actin filament-based process	42/490	489/11002	3.14546e-05	3.14546e-05	0.000579929	Ptger4/Tlr2/Sdc4/Tpm4/Sh3pxd2b/Pde4b/Hck/Fmnl2/Arap1/Ppm1f/Csrp1/Sdad1/Pdlim7/Plek/Actr3/Vasp/Pstpip2/Synpo/Src/Diaph1/Smad4/Pip5k1a/Braf/Msrb1/Atp1a1/Pdgfa/Sumo1/Bcl6/Arpc1b/Sri/Rhoc/Trip10/C9orf72/Edn1/Fscn1/Bcar1/Epb41l1/Rac2/Trpm2/Fhod1/Mical2/Cdc42bpg	42
GO:0051767	nitric-oxide synthase biosynthetic process	7/490	22/11002	3.16773e-05	3.16773e-05	0.000579929	Ptger4/Tlr2/Ccl2/Nampt/Nod2/Edn1/Jak2	7
GO:0051769	regulation of nitric-oxide synthase biosynthetic process	7/490	22/11002	3.16773e-05	3.16773e-05	0.000579929	Ptger4/Tlr2/Ccl2/Nampt/Nod2/Edn1/Jak2	7
GO:0032729	positive regulation of interferon-gamma production	10/490	47/11002	3.27769e-05	3.27769e-05	0.000596671	Cd244a/Pde4b/Cd14/Il12b/Tnfsf9/Tlr8/Ulbp1/Ifnar1/Il27/Il27ra	10
GO:0032651	regulation of interleukin-1 beta production	11/490	57/11002	3.50726e-05	3.50726e-05	0.00063252	Tlr2/Tnfaip3/Tlr8/Mefv/Ccl3/Nod2/Panx1/Ifnar1/Nlrp3/Malt1/Jak2	11
GO:0001503	ossification	23/490	203/11002	3.53743e-05	3.53743e-05	0.00063252	Ptger4/Noct/Spp1/Csf1/Sh3pxd2b/P2ry2/Igsf10/Snx10/Nab1/Cdk6/Pdlim7/Mmp14/Ahr/Mmp13/Hif1a/Rest/Smad4/Ccr1/Bcor/Ecm1/Ext1/Id3/Creb3l1	23
GO:0010810	regulation of cell-substrate adhesion	18/490	137/11002	3.56826e-05	3.56826e-05	0.00063252	Sdc4/Spp1/Csf1/Itga5/Emilin2/Ppm1f/Dab2/Cdk6/Mmp14/Iqgap1/Src/Braf/Bcl6/Ptprj/Bcar1/Rac2/Jak2/Prkcz	18
GO:0050706	regulation of interleukin-1 beta secretion	8/490	30/11002	3.59222e-05	3.59222e-05	0.00063252	Tlr2/Tnfaip3/Tlr8/Ccl3/Nod2/Panx1/Ifnar1/Nlrp3	8
GO:0060330	regulation of response to interferon-gamma	5/490	10/11002	3.59241e-05	3.59241e-05	0.00063252	Parp14/Ptpn2/Irgm1/Socs1/Irgm2	5
GO:0060334	regulation of interferon-gamma-mediated signaling pathway	5/490	10/11002	3.59241e-05	3.59241e-05	0.00063252	Parp14/Ptpn2/Irgm1/Socs1/Irgm2	5
GO:0032102	negative regulation of response to external stimulus	25/490	232/11002	3.82355e-05	3.82355e-05	0.000669559	Ccl12/Acod1/Ptger4/Ldlr/Cdkn1a/Hgf/Il12b/Trex1/Tnfaip3/Parp14/Sema4a/Ptpn2/Gpr18/Mefv/Clec2d/Fcgr2b/Nod2/Nfkb1/Mfhas1/Cdh5/Pdgfa/Fpr2/Ccr1/Nlrp3/Irak3	25
GO:0050670	regulation of lymphocyte proliferation	19/490	151/11002	4.01394e-05	4.01394e-05	0.0006991	Cd244a/Cdkn1a/Sdc4/Vcam1/Il12b/Cd274/Ccl5/Tnfsf9/Ahr/Cd40/Fcgr2b/Cd86/Icosl/Bcl6/Rac2/Il27/Cd38/Zc3h12d/Tnfrsf4	19
GO:0032695	negative regulation of interleukin-12 production	6/490	16/11002	4.1369e-05	4.1369e-05	0.000716641	Tlr2/Tlr8/Mefv/Nod2/Nfkb1/Irak3	6
GO:0062197	cellular response to chemical stress	25/490	234/11002	4.41313e-05	4.41313e-05	0.000760405	Prr5l/Hgf/Relb/Slc11a2/Trex1/Tnfaip3/Nfe2l2/Lrrc8c/Sesn2/Slc7a11/Hif1a/Sod2/Rest/Lcn2/Hmox1/Src/Dnaja1/Eif2s1/Nr4a3/Pnpt1/Foxo1/Bcar1/Jak2/Trpm2/Fancd2	25
GO:0030099	myeloid cell differentiation	28/490	278/11002	4.55096e-05	4.55096e-05	0.000775097	Tlr2/Csf1/Batf/Relb/Il12b/Ccl5/Slc11a2/Snx10/Tnfsf9/Ptpn2/Dab2/Cdk6/Clec2d/Paf1/Ccl3/Zbtb46/Acvr1b/Hif1a/Src/Plscr1/Mfhas1/Bcl6/Cd101/Ccr1/Eif6/Jak2/Tet2/Nme2	28
GO:0060759	regulation of response to cytokine stimulus	14/490	91/11002	4.56831e-05	4.56831e-05	0.000775097	Tlr2/Csf1/Il1rn/Trex1/Ifih1/Parp14/Ptpn2/Irgm1/Socs1/Adam17/Ikbke/Irgm2/Irak3/Ecm1	14
GO:1904951	positive regulation of establishment of protein localization	31/490	323/11002	4.57056e-05	4.57056e-05	0.000775097	Hcar2/Prr5l/Ptger4/Tlr2/Cd244a/Ccl2/Cd14/Cd274/Adam9/Plk3/Ifih1/Tlr8/Tlr1/Ncl/Nadk/Actr3/Ccl3/Mmp13/Hif1a/Nod2/Src/Panx1/Clec4e/Ifnar1/Sri/Nlrp3/Jak2/Cd38/Trpm2/Prkcz/Tnfrsf4	31
GO:0046887	positive regulation of hormone secretion	13/490	80/11002	4.72628e-05	4.72628e-05	0.000794799	Hcar2/Ptger4/Spp1/Dab2/Nadk/Rab8b/Hif1a/Smad4/Sri/Edn1/Jak2/Cd38/Trpm2	13
GO:0046651	lymphocyte proliferation	22/490	193/11002	4.75316e-05	4.75316e-05	0.000794799	Cd244a/Cdkn1a/Sdc4/Vcam1/Il12b/Cd274/Ccl5/Tnfsf9/Ahr/Cd40/Fcgr2b/Impdh2/Cd86/Ebi3/Icosl/Bcl6/Rac2/Malt1/Il27/Cd38/Zc3h12d/Tnfrsf4	22
GO:0046631	alpha-beta T cell activation	16/490	115/11002	4.76075e-05	4.76075e-05	0.000794799	Ptger4/Cd244a/Batf/Relb/Il12b/Cd274/Sema4a/Hlx/Gpr18/Socs1/Braf/Bcl6/Nlrp3/Malt1/Il27/Prkcz	16
GO:0045596	negative regulation of cell differentiation	39/490	450/11002	4.98206e-05	4.98206e-05	0.000827459	Cxcl10/Ldlr/Noct/Ccl9/Foxp4/Trib3/Sema4a/Hlx/Ptpn2/Nfe2l2/Dab2/Ifrd1/Cdk6/Zhx2/Clec2d/Paf1/Actr3/Ahr/Olfm1/Zbtb46/Il15ra/Sod2/Hpn/Socs1/Rest/Adam17/Smad4/Katna1/Daxx/Bcl6/Foxo1/Zeb1/Bcar1/Ntn1/Nme2/Vasn/Cd38/Plk2/Id3	39
GO:0032731	positive regulation of interleukin-1 beta production	9/490	40/11002	5.0908e-05	5.0908e-05	0.000841184	Tlr2/Tlr8/Ccl3/Nod2/Panx1/Ifnar1/Nlrp3/Malt1/Jak2	9
GO:1903039	positive regulation of leukocyte cell-cell adhesion	18/490	141/11002	5.2587e-05	5.2587e-05	0.000864493	Cd244a/Ccl2/Vcam1/Il12b/Cd274/Ccl5/Tnfsf9/Hlx/Socs1/Cd86/Icosl/Bcl6/Nr4a3/Nlrp3/Pik3r6/Ptafr/Malt1/Prkcz	18
GO:0010811	positive regulation of cell-substrate adhesion	13/490	81/11002	5.40556e-05	5.40556e-05	0.000884126	Sdc4/Spp1/Csf1/Itga5/Emilin2/Ppm1f/Dab2/Cdk6/Iqgap1/Braf/Ptprj/Jak2/Prkcz	13
GO:0031589	cell-substrate adhesion	23/490	211/11002	6.49878e-05	6.49878e-05	0.00105756	Sdc4/Spp1/Csf1/Vcam1/Itga5/Emilin2/Adam9/Ppm1f/Dab2/Cdk6/Mmp14/Iqgap1/Src/Pip5k1a/Braf/Bcl6/Ptprj/Bcar1/Rac2/Jak2/Prkcz/Itga2b/Lama5	23
GO:0032946	positive regulation of mononuclear cell proliferation	14/490	94/11002	6.59469e-05	6.59469e-05	0.00106778	Cd244a/Cdkn1a/Csf1/Vcam1/Il12b/Cd274/Ccl5/Tnfsf9/Cd40/Cd86/Icosl/Bcl6/Cd38/Tnfrsf4	14
GO:0071622	regulation of granulocyte chemotaxis	8/490	33/11002	7.5733e-05	7.5733e-05	0.0012201	Csf1/Ccl2/Ccl5/Nod2/C3ar1/Ptprj/Edn1/Rac2	8
GO:0032655	regulation of interleukin-12 production	9/490	42/11002	7.66797e-05	7.66797e-05	0.00122324	Tlr2/Il12b/Tnfsf9/Tlr8/Mefv/Cd40/Nod2/Nfkb1/Irak3	9
GO:0055082	cellular chemical homeostasis	39/490	459/11002	7.66875e-05	7.66875e-05	0.00122324	Cxcl10/Slc39a14/Ptger4/Ccrl2/Gpr35/Ccl2/P2ry2/Vcam1/Herpud1/Clic4/Fth1/Ccl5/Slc11a2/Slc31a1/Atp6v0c/Gpr18/Nadk/Ccl3/Cd40/Hif1a/Synpo/Lcn2/Hmox1/Diaph1/Slc30a4/Smad4/Anxa6/Atp6v0a1/Cdh5/Atp1a1/C3ar1/Sri/Fpr2/Edn1/Ccr1/Jak2/Cd38/Trpm2/Slc4a3	39
GO:0042116	macrophage activation	11/490	62/11002	7.89964e-05	7.89964e-05	0.00125387	Tlr2/Ldlr/Tnip2/Trex1/Nampt/Tlr8/Ulbp1/Tlr1/Mfhas1/Fpr2/Jak2	11
GO:0032733	positive regulation of interleukin-10 production	7/490	25/11002	7.94711e-05	7.94711e-05	0.00125522	Ptger4/Tlr2/Hgf/Il12b/Cd274/Nod2/Prkcz	7
GO:0022407	regulation of cell-cell adhesion	26/490	259/11002	8.95208e-05	8.95208e-05	0.00140705	Cd244a/Sdc4/Il1rn/Ccl2/Vcam1/Il12b/Cd274/Ccl5/Tnfaip3/Tnfsf9/Hlx/Ptpn2/Ppm1f/Socs1/Src/Cd86/Icosl/Bcl6/Nr4a3/Nlrp3/Pik3r6/Ptafr/Malt1/Jak2/Zc3h12d/Prkcz	26
GO:0050921	positive regulation of chemotaxis	13/490	85/11002	9.04305e-05	9.04305e-05	0.00141445	Cxcl10/Csf1/Ccl2/Ccl4/Ccl5/Ppm1f/Adam17/C3ar1/Ptprj/Fpr2/Edn1/Ccr1/Rac2	13
GO:0035458	cellular response to interferon-beta	9/490	43/11002	9.32059e-05	9.32059e-05	0.00145082	Acod1/Gbp3/Gbp2/Trex1/Irgm1/Igtp/Irgm2/Pnpt1/Gbp2b	9
GO:0030036	actin cytoskeleton organization	38/490	447/11002	9.38098e-05	9.38098e-05	0.0014532	Ptger4/Tlr2/Sdc4/Tpm4/Sh3pxd2b/Hck/Fmnl2/Arap1/Ppm1f/Csrp1/Sdad1/Pdlim7/Plek/Actr3/Vasp/Pstpip2/Synpo/Src/Diaph1/Smad4/Pip5k1a/Braf/Msrb1/Pdgfa/Bcl6/Arpc1b/Rhoc/Trip10/C9orf72/Edn1/Fscn1/Bcar1/Epb41l1/Rac2/Trpm2/Fhod1/Mical2/Cdc42bpg	38
GO:0032653	regulation of interleukin-10 production	8/490	34/11002	9.52212e-05	9.52212e-05	0.00146101	Ptger4/Tlr2/Hgf/Il12b/Cd274/Fcgr2b/Nod2/Prkcz	8
GO:0048246	macrophage chemotaxis	8/490	34/11002	9.52212e-05	9.52212e-05	0.00146101	Ccl12/Csf1/Gpr35/Ccl2/Ccl5/Ccl3/C3ar1/Ptprj	8
GO:0002449	lymphocyte mediated immunity	21/490	189/11002	0.000101942	0.000101942	0.00155671	Batf/Nectin2/Il12b/Rnf19b/Trex1/Ulbp1/Clec2d/Cd40/Fcgr2b/Nod2/Il18rap/Stx11/Icosl/Hspa8/Bcl6/Nlrp3/Pik3r6/Malt1/Prkcz/Il27ra/C1rl	21
GO:0050716	positive regulation of interleukin-1 secretion	7/490	26/11002	0.000104615	0.000104615	0.00157064	Tlr2/Tlr8/Ccl3/Nod2/Panx1/Ifnar1/Nlrp3	7
GO:0050718	positive regulation of interleukin-1 beta secretion	7/490	26/11002	0.000104615	0.000104615	0.00157064	Tlr2/Tlr8/Ccl3/Nod2/Panx1/Ifnar1/Nlrp3	7
GO:0044406	adhesion of symbiont to host	5/490	12/11002	0.000104803	0.000104803	0.00157064	Gbp3/Nectin2/Gbp2/Nectin1/Gbp2b	5
GO:0045064	T-helper 2 cell differentiation	5/490	12/11002	0.000104803	0.000104803	0.00157064	Batf/Hlx/Bcl6/Nlrp3/Prkcz	5
GO:0032615	interleukin-12 production	9/490	44/11002	0.000112618	0.000112618	0.00167221	Tlr2/Il12b/Tnfsf9/Tlr8/Mefv/Cd40/Nod2/Nfkb1/Irak3	9
GO:0032732	positive regulation of interleukin-1 production	9/490	44/11002	0.000112618	0.000112618	0.00167221	Tlr2/Tlr8/Ccl3/Nod2/Panx1/Ifnar1/Nlrp3/Malt1/Jak2	9
GO:0070665	positive regulation of leukocyte proliferation	14/490	99/11002	0.000117284	0.000117284	0.00173101	Cd244a/Cdkn1a/Csf1/Vcam1/Il12b/Cd274/Ccl5/Tnfsf9/Cd40/Cd86/Icosl/Bcl6/Cd38/Tnfrsf4	14
GO:0051607	defense response to virus	20/490	177/11002	0.000117653	0.000117653	0.00173101	Cxcl10/Il12b/Trim30a/Ccl5/Trex1/Stat2/Ifih1/Tlr8/Slfn8/G3bp1/Apobec3/Cd40/Zc3hav1/Traf3/Plscr1/Cd86/Ifnar1/Nlrp3/Il27/Gbp2b	20
GO:0043434	response to peptide hormone	23/490	220/11002	0.000123301	0.000123301	0.00179771	Gm9847/Trib3/Stat2/Ptpn2/Vgf/Sesn2/Gatm/Eprs/Rab8b/Socs1/Serpina3f/Src/Nfkb1/Braf/Zfp106/Eif4ebp1/Nr4a3/Foxo1/Eif6/Bcar1/Jak2/Prkcz/Serpina3g	23
GO:0043255	regulation of carbohydrate biosynthetic process	11/490	65/11002	0.000123303	0.000123303	0.00179771	Ptger4/Cd244a/Sik1/Ptpn2/Ranbp2/Plek/Sesn2/Hif1a/Nfkb1/Foxo1/Ptafr	11
GO:0016051	carbohydrate biosynthetic process	16/490	125/11002	0.00013144	0.00013144	0.00190771	Ptger4/B3gnt7/Cd244a/B4galt5/Sik1/Ptpn2/Ranbp2/Plek/Sesn2/Hif1a/Nfkb1/Crtc2/Foxo1/Ptafr/St3gal4/Ext1	16
GO:0043068	positive regulation of programmed cell death	39/490	471/11002	0.000132881	0.000132881	0.00191998	Hcar2/Ccl12/Cdkn1a/Apaf1/Il12b/Cd274/Ccl5/Slc11a2/Tnfaip8/Ptpn2/Ppm1f/Pea15a/Ccl3/Olfm1/Cd40/Hif1a/Sod2/Rest/Hmox1/Igf2r/Src/Adam17/Dnaja1/Smad4/Optn/Plscr1/Daxx/Eif2s1/Phlda1/Bcl6/Nr4a3/Foxo1/Nlrp3/Sav1/Malt1/Jak2/Plagl2/Id3/Nupr1	39
GO:0050830	defense response to Gram-positive bacterium	10/490	55/11002	0.000134448	0.000134448	0.00193396	Tlr2/Gbp3/Gbp2/Hck/Tnfaip8/Nod2/Adam17/Nlrp3/Il27ra/Gbp2b	10
GO:0034599	cellular response to oxidative stress	22/490	207/11002	0.00013558	0.00013558	0.00193768	Prr5l/Hgf/Slc11a2/Trex1/Tnfaip3/Nfe2l2/Sesn2/Slc7a11/Hif1a/Sod2/Rest/Lcn2/Hmox1/Src/Eif2s1/Nr4a3/Pnpt1/Foxo1/Bcar1/Jak2/Trpm2/Fancd2	22
GO:0097193	intrinsic apoptotic signaling pathway	24/490	236/11002	0.00013591	0.00013591	0.00193768	Cdkn1a/Apaf1/Herpud1/Trib3/Bcl2a1d/Ptpn2/Bcl2a1b/Nfe2l2/Ppm1f/Bcl2a1a/Hif1a/Sod2/Hmox1/Chac1/Src/Dnaja1/Plscr1/Ikbke/Aen/Jak2/Plagl2/Bcl2a1c/Nupr1/Creb3l1	24
GO:0046890	regulation of lipid biosynthetic process	15/490	113/11002	0.000140376	0.000140376	0.00199254	Fabp5/Ldlr/Sik1/Trex1/Trib3/Dab2/Rest/Nfkb1/Ctdnep1/Atp1a1/Pdgfa/Adora2b/Fpr2/Eif6/Stard4	15
GO:0018108	peptidyl-tyrosine phosphorylation	22/490	208/11002	0.000145469	0.000145469	0.00205578	Ptger4/Hgf/Itga5/Il12b/Ccl5/Hck/Samsn1/Parp14/Mvp/Ptpn2/Rap2c/Cd40/Socs1/Iqgap1/Nod2/Src/Adam17/Ifnar1/Pdgfa/Ptprj/Jak2/Prkcz	22
GO:1904035	regulation of epithelial cell apoptotic process	10/490	56/11002	0.00015727	0.00015727	0.00221284	Ccl12/Tnip2/Tnfaip3/Nfe2l2/Cd40/Hmox1/Eif2s1/Braf/Jak2/Nupr1	10
GO:1903037	regulation of leukocyte cell-cell adhesion	21/490	195/11002	0.000159094	0.000159094	0.00222878	Cd244a/Sdc4/Ccl2/Vcam1/Il12b/Cd274/Ccl5/Tnfsf9/Hlx/Ptpn2/Socs1/Cd86/Icosl/Bcl6/Nr4a3/Nlrp3/Pik3r6/Ptafr/Malt1/Zc3h12d/Prkcz	21
GO:0042113	B cell activation	20/490	181/11002	0.000159999	0.000159999	0.00223174	Cdkn1a/Tnip2/Batf/Samsn1/Tnfaip3/Ptpn2/Mmp14/Ahr/Cd40/Fcgr2b/Nod2/Adam17/Cd86/Icosl/Bcl6/Ptprj/Malt1/Cd38/Il27ra/Tnfrsf4	20
GO:0007044	cell-substrate junction assembly	11/490	67/11002	0.000163357	0.000163357	0.00225903	Sdc4/Itga5/Tns1/Ppm1f/Mmp14/Iqgap1/Src/Pip5k1a/Plec/Ptprj/Dst	11
GO:0150115	cell-substrate junction organization	11/490	67/11002	0.000163357	0.000163357	0.00225903	Sdc4/Itga5/Tns1/Ppm1f/Mmp14/Iqgap1/Src/Pip5k1a/Plec/Ptprj/Dst	11
GO:0062013	positive regulation of small molecule metabolic process	13/490	90/11002	0.00016421	0.00016421	0.00226112	Ptger4/Cd244a/Ptpn2/Dab2/Hif1a/Src/Nfkb1/Adora2b/Nr4a3/Foxo1/Nos2/Ptafr/Stard4	13
GO:0002507	tolerance induction	6/490	20/11002	0.000171921	0.000171921	0.00235723	Acod1/Cd274/Tnfaip3/Cd86/C3ar1/Irak3	6
GO:0018212	peptidyl-tyrosine modification	22/490	211/11002	0.00017908	0.00017908	0.00243688	Ptger4/Hgf/Itga5/Il12b/Ccl5/Hck/Samsn1/Parp14/Mvp/Ptpn2/Rap2c/Cd40/Socs1/Iqgap1/Nod2/Src/Adam17/Ifnar1/Pdgfa/Ptprj/Jak2/Prkcz	22
GO:0032613	interleukin-10 production	8/490	37/11002	0.00018	0.00018	0.00243688	Ptger4/Tlr2/Hgf/Il12b/Cd274/Fcgr2b/Nod2/Prkcz	8
GO:0071675	regulation of mononuclear cell migration	8/490	37/11002	0.00018	0.00018	0.00243688	Cxcl10/Csf1/Ccl2/Ccl5/C3ar1/Ptprj/Fpr2/Ccr1	8
GO:0050870	positive regulation of T cell activation	16/490	129/11002	0.000190786	0.000190786	0.0025721	Cd244a/Ccl2/Vcam1/Il12b/Cd274/Ccl5/Tnfsf9/Hlx/Socs1/Cd86/Icosl/Bcl6/Nlrp3/Pik3r6/Malt1/Prkcz	16
GO:0009636	response to toxic substance	22/490	212/11002	0.000191718	0.000191718	0.0025739	Hgf/Ccl4/Ccl5/Adam9/Slc31a1/Tnfaip3/Abtb2/Nfe2l2/Ahr/Slc7a11/Hif1a/Sod2/Lcn2/Hmox1/Src/Slc30a4/Nfkb1/Daxx/Nr4a3/Ccl7/Trpm2/Nupr1	22
GO:0032606	type I interferon production	12/490	80/11002	0.000202474	0.000202474	0.00270702	Acod1/Tlr2/Relb/Cd14/Trex1/Ifih1/Tlr8/Irf9/G3bp1/Zc3hav1/Traf3/Ifnar1	12
GO:0050671	positive regulation of lymphocyte proliferation	13/490	92/11002	0.000205725	0.000205725	0.00273912	Cd244a/Cdkn1a/Vcam1/Il12b/Cd274/Ccl5/Tnfsf9/Cd40/Cd86/Icosl/Bcl6/Cd38/Tnfrsf4	13
GO:0008285	negative regulation of cell population proliferation	35/490	415/11002	0.0002067	0.0002067	0.00274077	Ccl12/Slfn2/Tlr2/Cdkn1a/Sdc4/Il12b/Cd274/Fth1/Tnfaip3/Spint1/Ptpn2/Dab2/Cdk6/Ptges/Ahr/Fcgr2b/Sod2/Hpn/Rest/Hmox1/Sh3bp4/Smad4/Optn/Cd86/Cdh5/Adora2b/Bcl6/Ptprj/Zeb1/Sav1/Jak2/Ing2/Nup62/Zc3h12d/Nupr1	35
GO:0051259	protein complex oligomerization	34/490	399/11002	0.000209491	0.000209491	0.0027664	Ehd1/Birc3/Gbp5/Apaf1/Ccl5/Lrrc8c/Vasp/Olfm1/Chmp4b/Sod2/Sqstm1/Rest/Usp16/Lcn2/Hmox1/Nod2/Src/Trappc10/Panx1/Smad4/Optn/Impdh2/Anxa6/Ikbke/Braf/Crtc2/Rhoc/Pnpt1/Malt1/Nme2/Nup62/Trpm2/Prkcz/Mcoln2	34
GO:0042832	defense response to protozoan	7/490	29/11002	0.000221002	0.000221002	0.0029065	Batf/Gbp3/Gbp2/Il12b/Cd40/Irgm2/Gbp2b	7
GO:0001959	regulation of cytokine-mediated signaling pathway	12/490	81/11002	0.000228286	0.000228286	0.00299008	Csf1/Il1rn/Trex1/Parp14/Ptpn2/Irgm1/Socs1/Adam17/Ikbke/Irgm2/Irak3/Ecm1	12
GO:0043065	positive regulation of apoptotic process	38/490	468/11002	0.000241035	0.000241035	0.00314429	Hcar2/Ccl12/Apaf1/Il12b/Cd274/Ccl5/Slc11a2/Tnfaip8/Ptpn2/Ppm1f/Pea15a/Ccl3/Olfm1/Cd40/Hif1a/Sod2/Rest/Hmox1/Igf2r/Src/Adam17/Dnaja1/Smad4/Optn/Plscr1/Daxx/Eif2s1/Phlda1/Bcl6/Nr4a3/Foxo1/Nlrp3/Sav1/Malt1/Jak2/Plagl2/Id3/Nupr1	38
GO:2000106	regulation of leukocyte apoptotic process	11/490	70/11002	0.000243853	0.000243853	0.00316823	Hcar2/Cd274/Ccl5/Bcl2a1a/Slc7a11/Fcgr2b/Hif1a/Nod2/Adam17/Nr4a3/Tnfrsf4	11
GO:0038093	Fc receptor signaling pathway	5/490	14/11002	0.000245951	0.000245951	0.00316992	Fcgr2b/Clec4d/Clec4e/Ptprj/Nr4a3	5
GO:0072606	interleukin-8 secretion	5/490	14/11002	0.000245951	0.000245951	0.00316992	Tlr2/Cd244a/Cd14/Tlr1/Nos2	5
GO:0072507	divalent inorganic cation homeostasis	26/490	277/11002	0.000265343	0.000265343	0.00340623	Cxcl10/Slc39a14/Ptger4/Ccrl2/Gpr35/Ccl2/P2ry2/Herpud1/Ccl5/Snx10/Gpr18/Ccl3/Cd40/Synpo/Diaph1/Slc30a4/Anxa6/Cdh5/C3ar1/Sri/Fpr2/Edn1/Ccr1/Jak2/Cd38/Trpm2	26
GO:0002367	cytokine production involved in immune response	11/490	71/11002	0.000277211	0.000277211	0.00353045	Tlr2/Il12b/Hmox1/Nod2/Il18rap/Bcl6/Nr4a3/Nlrp3/Malt1/Irak3/Prkcz	11
GO:0110020	regulation of actomyosin structure organization	11/490	71/11002	0.000277211	0.000277211	0.00353045	Ptger4/Sdc4/Sh3pxd2b/Arap1/Ppm1f/Synpo/Smad4/Braf/Rhoc/Edn1/Fhod1	11
GO:0006109	regulation of carbohydrate metabolic process	15/490	121/11002	0.000302128	0.000302128	0.00383263	Ptger4/Cd244a/Sik1/Trex1/Ptpn2/Ranbp2/Plek/Sesn2/Hif1a/Src/Nfkb1/Foxo1/Eif6/Ptafr/Nupr1	15
GO:1901699	cellular response to nitrogen compound	33/490	391/11002	0.000308728	0.000308728	0.003901	Tlr2/Gm9847/Pde4b/Vcam1/Trex1/Trib3/Ifih1/Ptpn2/Sesn2/Ahr/Eprs/Fcgr2b/Rab8b/Socs1/Nod2/Sh3bp4/Src/Diaph1/Zc3hav1/Nfkb1/Daxx/Zfp106/Eif4ebp1/Fpr2/Nr4a3/Foxo1/Zeb1/Nlrp3/Cpeb4/Bcar1/Jak2/Trpm2/Prkcz	33
GO:0044057	regulation of system process	28/490	311/11002	0.000311201	0.000311201	0.00391688	Hcar2/Fabp5/Ptger4/Gpr35/Pde4b/Hgf/Dab2/Anpep/Ahr/Mmp13/Rab8b/Hif1a/Src/Smad4/Anxa6/Atp1a1/Sumo1/Adora2b/Sri/Nr4a3/Trip10/Edn1/Foxo1/Ptafr/Jak2/Cd38/Rab11fip1/Prkcz	28
GO:0030279	negative regulation of ossification	9/490	50/11002	0.000313865	0.000313865	0.00392567	Noct/P2ry2/Cdk6/Ahr/Hif1a/Ccr1/Bcor/Ecm1/Id3	9
GO:0010657	muscle cell apoptotic process	11/490	72/11002	0.000314336	0.000314336	0.00392567	Apaf1/Il12b/Nfe2l2/Sod2/Hmox1/Smad4/Hspa8/Trip10/Edn1/Jak2/Nupr1	11
GO:0072503	cellular divalent inorganic cation homeostasis	25/490	265/11002	0.000320976	0.000320976	0.00399312	Cxcl10/Slc39a14/Ptger4/Ccrl2/Gpr35/Ccl2/P2ry2/Herpud1/Ccl5/Gpr18/Ccl3/Cd40/Synpo/Diaph1/Slc30a4/Anxa6/Cdh5/C3ar1/Sri/Fpr2/Edn1/Ccr1/Jak2/Cd38/Trpm2	25
GO:0001776	leukocyte homeostasis	12/490	84/11002	0.000323157	0.000323157	0.00400479	Hcar2/Ccl2/Pde4b/Tnfaip3/Bcl2a1a/Ahr/Slc7a11/Fcgr2b/Hif1a/Adam17/Spns2/Tnfrsf4	12
GO:0010508	positive regulation of autophagy	14/490	109/11002	0.000329411	0.000329411	0.00406666	Tlr2/Plk3/Irgm1/Mefv/Sesn2/Hif1a/Hmox1/Nod2/Sh3bp4/Optn/Irgm2/C9orf72/Foxo1/Plk2	14
GO:0046883	regulation of hormone secretion	17/490	149/11002	0.000334942	0.000334942	0.00411916	Hcar2/Ptger4/Spp1/Ccl5/Dab2/Nadk/Rab8b/Hif1a/Rest/Smad4/Sri/Edn1/Nos2/Jak2/Cd38/Trpm2/Rab11fip1	17
GO:0022409	positive regulation of cell-cell adhesion	18/490	163/11002	0.000339013	0.000339013	0.00415337	Cd244a/Ccl2/Vcam1/Il12b/Cd274/Ccl5/Tnfsf9/Hlx/Socs1/Cd86/Icosl/Bcl6/Nr4a3/Nlrp3/Pik3r6/Ptafr/Malt1/Prkcz	18
GO:0001562	response to protozoan	7/490	31/11002	0.000344642	0.000344642	0.00420634	Batf/Gbp3/Gbp2/Il12b/Cd40/Irgm2/Gbp2b	7
GO:0090026	positive regulation of monocyte chemotaxis	5/490	15/11002	0.000355495	0.000355495	0.00430618	Cxcl10/Ccl2/Ccl5/Fpr2/Ccr1	5
GO:1901623	regulation of lymphocyte chemotaxis	5/490	15/11002	0.000355495	0.000355495	0.00430618	Ccl12/Cxcl10/Ccl4/Ccl5/Adam17	5
GO:0043433	negative regulation of DNA-binding transcription factor activity	15/490	123/11002	0.0003616	0.0003616	0.00435926	Acod1/Sik1/Bhlhe40/Tnfaip3/Hmox1/Nod2/Traf3/Sumo1/Sri/Nfkbib/Nlrp3/Irak3/Id3/Tnfrsf4/Nupr1	15
GO:0002573	myeloid leukocyte differentiation	17/490	150/11002	0.000362584	0.000362584	0.00435926	Tlr2/Csf1/Batf/Relb/Il12b/Ccl5/Snx10/Tnfsf9/Ptpn2/Cdk6/Clec2d/Ccl3/Zbtb46/Src/Cd101/Ccr1/Nme2	17
GO:0045913	positive regulation of carbohydrate metabolic process	9/490	51/11002	0.000366354	0.000366354	0.00438822	Ptger4/Cd244a/Ptpn2/Ranbp2/Hif1a/Src/Nfkb1/Foxo1/Ptafr	9
GO:0055074	calcium ion homeostasis	24/490	253/11002	0.000387938	0.000387938	0.00461683	Cxcl10/Ptger4/Ccrl2/Gpr35/Ccl2/P2ry2/Herpud1/Ccl5/Snx10/Gpr18/Ccl3/Cd40/Synpo/Diaph1/Anxa6/Cdh5/C3ar1/Sri/Fpr2/Edn1/Ccr1/Jak2/Cd38/Trpm2	24
GO:0050864	regulation of B cell activation	13/490	98/11002	0.000388305	0.000388305	0.00461683	Cdkn1a/Tnip2/Samsn1/Tnfaip3/Mmp14/Ahr/Cd40/Fcgr2b/Nod2/Bcl6/Cd38/Il27ra/Tnfrsf4	13
GO:1905523	positive regulation of macrophage migration	6/490	23/11002	0.000399515	0.000399515	0.00473264	Csf1/Ccl2/Ccl5/Mmp14/C3ar1/Ptprj	6
GO:0010506	regulation of autophagy	21/490	209/11002	0.000413544	0.000413544	0.00488089	Tlr2/Plk3/Trib3/Tnfaip3/Dram1/Nampt/Irgm1/Mefv/Sesn2/Chmp4b/Hif1a/Hmox1/Nod2/Sh3bp4/Optn/Atp6v0a1/Irgm2/C9orf72/Foxo1/Plk2/Nupr1	21
GO:0032757	positive regulation of interleukin-8 production	7/490	32/11002	0.000424433	0.000424433	0.00499113	Ptger4/Tlr2/Cd244a/Cd14/Tlr8/Tlr1/Nod2	7
GO:0002706	regulation of lymphocyte mediated immunity	15/490	125/11002	0.00043086	0.00043086	0.00504827	Nectin2/Il12b/Ulbp1/Clec2d/Cd40/Fcgr2b/Nod2/Il18rap/Hspa8/Bcl6/Nlrp3/Pik3r6/Malt1/Prkcz/Il27ra	15
GO:0031331	positive regulation of cellular catabolic process	27/490	302/11002	0.000443036	0.000443036	0.00517213	Prr5l/Tlr2/Ldlr/Herpud1/Rnf19b/Adam9/Plk3/Trib3/Tnfaip3/Dab2/Irgm1/Mefv/Sesn2/Hif1a/Hmox1/Nod2/Sh3bp4/Zc3hav1/Optn/Irgm2/Sumo1/C9orf72/Pnpt1/Foxo1/Zc3h12d/Plk2/Nupr1	27
GO:0042267	natural killer cell mediated cytotoxicity	8/490	42/11002	0.000452464	0.000452464	0.00524419	Nectin2/Il12b/Rnf19b/Ulbp1/Clec2d/Il18rap/Stx11/Pik3r6	8
GO:0042509	regulation of tyrosine phosphorylation of STAT protein	8/490	42/11002	0.000452464	0.000452464	0.00524419	Ptger4/Il12b/Ccl5/Parp14/Ptpn2/Cd40/Socs1/Jak2	8
GO:0045619	regulation of lymphocyte differentiation	15/490	126/11002	0.000469555	0.000469555	0.00542278	Tnfsf9/Hlx/Ptpn2/Mmp14/Il15ra/Socs1/Braf/Bcl6/Zeb1/Nlrp3/Pik3r6/Malt1/Il27/Prkcz/Fancd2	15
GO:0006979	response to oxidative stress	27/490	304/11002	0.000491258	0.000491258	0.00565316	Prr5l/Hgf/Slc11a2/Trex1/Adam9/Plk3/Tnfaip3/Nfe2l2/Sesn2/Slc7a11/Hif1a/Sod2/Rest/Lcn2/Hmox1/Src/Nfkb1/Eif2s1/Nr4a3/Pnpt1/Foxo1/Bcar1/Jak2/Cd38/Trpm2/Fancd2/Naprt	27
GO:1902532	negative regulation of intracellular signal transduction	32/490	385/11002	0.000496334	0.000496334	0.00569125	Pde4b/Sik1/Rnf149/Tnip3/Herpud1/Tank/Tnfaip3/Hipk3/Bcl2a1d/Ptpn2/Bcl2a1b/Nfe2l2/Dab2/Bcl2a1a/Sesn2/Tnip1/Hif1a/Sod2/Sh3bp4/Src/Dnaja1/Smad4/Optn/Bcl6/Sri/Ptprj/Foxo1/Nlrp3/Irak3/Nup62/Bcl2a1c/Creb3l1	32
GO:0009408	response to heat	11/490	76/11002	0.000507437	0.000507437	0.00579793	Ccl2/Pde4b/Hspa5/Hmox1/Dnaja1/Daxx/Eif2s1/Hspa8/Sumo1/Tfec/Trpm2	11
GO:0007249	I-kappaB kinase/NF-kappaB signaling	17/490	155/11002	0.000532395	0.000532395	0.0060616	Tlr2/Tnip2/Il1rn/Relb/Tnip3/Tank/Tnfaip3/Tlr8/Saa3/Alpk1/Tnip1/Sqstm1/Nod2/Zc3hav1/Optn/Malt1/Nup62	17
GO:0002228	natural killer cell mediated immunity	8/490	43/11002	0.00053458	0.00053458	0.00606505	Nectin2/Il12b/Rnf19b/Ulbp1/Clec2d/Il18rap/Stx11/Pik3r6	8
GO:0031032	actomyosin structure organization	15/490	128/11002	0.000555931	0.000555931	0.00628515	Ptger4/Sdc4/Sh3pxd2b/Arap1/Ppm1f/Csrp1/Synpo/Src/Smad4/Braf/Rhoc/Edn1/Epb41l1/Fhod1/Cdc42bpg	15
GO:0002819	regulation of adaptive immune response	16/490	142/11002	0.000571398	0.000571398	0.00643743	Nectin2/Il12b/Cd274/Samsn1/Tnfaip3/Hlx/Cd40/Fcgr2b/Nod2/Hspa8/Bcl6/Nlrp3/Malt1/Il27/Prkcz/Il27ra	16
GO:0002822	regulation of adaptive immune response based on somatic recombination of immune receptors built from immunoglobulin superfamily domains	15/490	129/11002	0.000603976	0.000603976	0.00678075	Nectin2/Il12b/Cd274/Tnfaip3/Hlx/Cd40/Fcgr2b/Nod2/Hspa8/Bcl6/Nlrp3/Malt1/Il27/Prkcz/Il27ra	15
GO:0045859	regulation of protein kinase activity	38/490	491/11002	0.000616079	0.000616079	0.0068926	Cdkn1a/Sdc4/Csf1/Il1rn/Hgf/Il12b/Pik3r5/Adam9/Trib3/Tnfaip3/Hipk3/Mvp/Ptpn2/Rap2c/Ppm1f/Dab2/Sesn2/Hexim1/Tlr1/Cd40/Socs1/Iqgap1/Nod2/Src/Adam17/Dnaja1/Daxx/Irgm2/Pdgfa/Ptprj/Edn1/Pik3r6/Malt1/Jak2/Irak3/Nup62/Prkcz/Tnfrsf4	38
GO:0097237	cellular response to toxic substance	14/490	116/11002	0.00062592	0.00062592	0.00690992	Hgf/Slc31a1/Tnfaip3/Abtb2/Nfe2l2/Sod2/Lcn2/Hmox1/Src/Nfkb1/Daxx/Nr4a3/Ccl7/Trpm2	14
GO:0001774	microglial cell activation	7/490	34/11002	0.000628005	0.000628005	0.00690992	Tlr2/Ldlr/Nampt/Tlr8/Tlr1/Fpr2/Jak2	7
GO:0002269	leukocyte activation involved in inflammatory response	7/490	34/11002	0.000628005	0.000628005	0.00690992	Tlr2/Ldlr/Nampt/Tlr8/Tlr1/Fpr2/Jak2	7
GO:0060760	positive regulation of response to cytokine stimulus	8/490	44/11002	0.000628349	0.000628349	0.00690992	Tlr2/Csf1/Ifih1/Parp14/Irgm1/Adam17/Ikbke/Irgm2	8
GO:1903556	negative regulation of tumor necrosis factor superfamily cytokine production	8/490	44/11002	0.000628349	0.000628349	0.00690992	Ptger4/Cd274/Trim30a/Tnfaip3/Gpr18/Nod2/Irak3/Il27ra	8
GO:0002418	immune response to tumor cell	4/490	10/11002	0.000658548	0.000658548	0.00713234	Nectin2/Il12b/Cd274/Ulbp1	4
GO:0034135	regulation of toll-like receptor 2 signaling pathway	4/490	10/11002	0.000658548	0.000658548	0.00713234	Acod1/Tlr1/Nod2/Mfhas1	4
GO:0043619	regulation of transcription from RNA polymerase II promoter in response to oxidative stress	4/490	10/11002	0.000658548	0.000658548	0.00713234	Nfe2l2/Sesn2/Hif1a/Hmox1	4
GO:0045628	regulation of T-helper 2 cell differentiation	4/490	10/11002	0.000658548	0.000658548	0.00713234	Hlx/Bcl6/Nlrp3/Prkcz	4
GO:0006874	cellular calcium ion homeostasis	23/490	247/11002	0.000661197	0.000661197	0.00713234	Cxcl10/Ptger4/Ccrl2/Gpr35/Ccl2/P2ry2/Herpud1/Ccl5/Gpr18/Ccl3/Cd40/Synpo/Diaph1/Anxa6/Cdh5/C3ar1/Sri/Fpr2/Edn1/Ccr1/Jak2/Cd38/Trpm2	23
GO:0007204	positive regulation of cytosolic calcium ion concentration	17/490	158/11002	0.000664069	0.000664069	0.00713234	Cxcl10/Ptger4/Ccrl2/Gpr35/P2ry2/Gpr18/Ccl3/Synpo/Diaph1/C3ar1/Sri/Fpr2/Edn1/Ccr1/Jak2/Cd38/Trpm2	17
GO:0070482	response to oxygen levels	17/490	158/11002	0.000664069	0.000664069	0.00713234	Slc11a2/Plk3/Nfe2l2/Hif1a/Sod2/Rest/Hmox1/Adam17/Smad4/Eif4ebp1/Edn1/Foxo1/Nos2/Cpeb4/Vasn/Cd38/Suv39h2	17
GO:0032970	regulation of actin filament-based process	24/490	263/11002	0.000679505	0.000679505	0.00725779	Ptger4/Tlr2/Sdc4/Sh3pxd2b/Pde4b/Hck/Arap1/Ppm1f/Plek/Actr3/Vasp/Synpo/Smad4/Braf/Atp1a1/Sumo1/Arpc1b/Sri/Rhoc/C9orf72/Edn1/Fscn1/Trpm2/Fhod1	24
GO:0051770	positive regulation of nitric-oxide synthase biosynthetic process	5/490	17/11002	0.000680254	0.000680254	0.00725779	Tlr2/Ccl2/Nampt/Nod2/Jak2	5
GO:0048872	homeostasis of number of cells	22/490	233/11002	0.000714175	0.000714175	0.00759454	Hcar2/Csf1/Ccl2/Pde4b/Slc11a2/Tnfaip3/Ptpn2/Cdk6/Bcl2a1a/Ahr/Slc7a11/Acvr1b/Fcgr2b/Hif1a/Hmox1/Adam17/Mfhas1/Bcl6/Spns2/Jak2/Tet2/Tnfrsf4	22
GO:0042060	wound healing	20/490	203/11002	0.000723902	0.000723902	0.00767266	Ptger4/Cdkn1a/Sdc4/Ccl2/Igsf10/Nfe2l2/Ifrd1/Plek/Slc7a11/Hif1a/Hmox1/Smad4/Anxa6/Pdgfa/Plec/Ptprj/Enpp4/Jaml/Dst/Itga2b	20
GO:0007260	tyrosine phosphorylation of STAT protein	8/490	45/11002	0.000734954	0.000734954	0.00776426	Ptger4/Il12b/Ccl5/Parp14/Ptpn2/Cd40/Socs1/Jak2	8
GO:0010676	positive regulation of cellular carbohydrate metabolic process	7/490	35/11002	0.000755336	0.000755336	0.00790185	Cd244a/Ptpn2/Ranbp2/Hif1a/Src/Foxo1/Ptafr	7
GO:0042088	T-helper 1 type immune response	7/490	35/11002	0.000755336	0.000755336	0.00790185	Relb/Il12b/Sema4a/Hlx/Il18rap/Il27/Il27ra	7
GO:0043370	regulation of CD4-positive, alpha-beta T cell differentiation	7/490	35/11002	0.000755336	0.000755336	0.00790185	Hlx/Socs1/Bcl6/Nlrp3/Malt1/Il27/Prkcz	7
GO:0046879	hormone secretion	19/490	189/11002	0.000763539	0.000763539	0.00796182	Hcar2/Ptger4/Spp1/Il1rn/Ccl5/Dab2/Vgf/Nadk/Rab8b/Hif1a/Rest/Smad4/Sri/Edn1/Nos2/Jak2/Cd38/Trpm2/Rab11fip1	19
GO:0002262	myeloid cell homeostasis	15/490	132/11002	0.000769897	0.000769897	0.00800222	Hcar2/Ccl2/Pde4b/Slc11a2/Ptpn2/Cdk6/Slc7a11/Acvr1b/Fcgr2b/Hif1a/Hmox1/Adam17/Mfhas1/Bcl6/Jak2	15
GO:0009611	response to wounding	25/490	282/11002	0.00080749	0.00080749	0.00836598	Ptger4/Cdkn1a/Sdc4/Ccl2/Igsf10/Tnfaip3/Nfe2l2/Ifrd1/Plek/Slc7a11/Hif1a/Sod2/Hmox1/Adam17/Smad4/Anxa6/Braf/Pdgfa/Plec/Ptprj/Jak2/Enpp4/Jaml/Dst/Itga2b	25
GO:0033032	regulation of myeloid cell apoptotic process	6/490	26/11002	0.000813249	0.000813249	0.00837181	Hcar2/Ccl5/Slc7a11/Fcgr2b/Nod2/Adam17	6
GO:0045622	regulation of T-helper cell differentiation	6/490	26/11002	0.000813249	0.000813249	0.00837181	Hlx/Bcl6/Nlrp3/Malt1/Il27/Prkcz	6
GO:0097435	supramolecular fiber organization	35/490	447/11002	0.000817506	0.000817506	0.00838883	Kif2c/Ptger4/Tlr2/Ldlr/Sdc4/Tpm4/Sh3pxd2b/Plk3/Arap1/Ppm1f/Csrp1/Plek/Pde4dip/Actr3/Vasp/Pstpip2/Synpo/Src/Diaph1/Smad4/Katna1/Cdh5/Braf/Msrb1/Hspa8/Arpc1b/Rhoc/C9orf72/Edn1/Fscn1/Bcar1/Rac2/Fhod1/Dst/Mical2	35
GO:0045580	regulation of T cell differentiation	13/490	106/11002	0.000832104	0.000832104	0.00848458	Tnfsf9/Hlx/Ptpn2/Socs1/Braf/Bcl6/Zeb1/Nlrp3/Pik3r6/Malt1/Il27/Prkcz/Fancd2	13
GO:0050851	antigen receptor-mediated signaling pathway	13/490	106/11002	0.000832104	0.000832104	0.00848458	Pde4b/Nectin2/Lcp2/Bcl2a1d/Ptpn2/Fcgr2b/Icosl/Braf/Ptprj/Fyb/Bcar1/Malt1/Cd38	13
GO:0002718	regulation of cytokine production involved in immune response	9/490	57/11002	0.000854996	0.000854996	0.00864254	Tlr2/Hmox1/Nod2/Bcl6/Nr4a3/Nlrp3/Malt1/Irak3/Prkcz	9
GO:0045824	negative regulation of innate immune response	8/490	46/11002	0.000855642	0.000855642	0.00864254	Acod1/Trex1/Tnfaip3/Parp14/Ptpn2/Clec2d/Ccr1/Irak3	8
GO:2000514	regulation of CD4-positive, alpha-beta T cell activation	8/490	46/11002	0.000855642	0.000855642	0.00864254	Cd274/Hlx/Socs1/Bcl6/Nlrp3/Malt1/Il27/Prkcz	8
GO:0009914	hormone transport	19/490	191/11002	0.000867782	0.000867782	0.00873776	Hcar2/Ptger4/Spp1/Il1rn/Ccl5/Dab2/Vgf/Nadk/Rab8b/Hif1a/Rest/Smad4/Sri/Edn1/Nos2/Jak2/Cd38/Trpm2/Rab11fip1	19
GO:2001243	negative regulation of intrinsic apoptotic signaling pathway	11/490	81/11002	0.000879459	0.000879459	0.00882775	Herpud1/Bcl2a1d/Bcl2a1b/Nfe2l2/Bcl2a1a/Hif1a/Sod2/Src/Dnaja1/Bcl2a1c/Creb3l1	11
GO:0010660	regulation of muscle cell apoptotic process	10/490	69/11002	0.000895047	0.000895047	0.00892859	Il12b/Nfe2l2/Sod2/Hmox1/Smad4/Hspa8/Trip10/Edn1/Jak2/Nupr1	10
GO:0032755	positive regulation of interleukin-6 production	10/490	69/11002	0.000895047	0.000895047	0.00892859	Tlr2/Il1rn/Ifih1/Tnfsf9/Tlr8/Tlr1/Ncl/Nod2/Adora2b/Ptafr	10
GO:0010759	positive regulation of macrophage chemotaxis	5/490	18/11002	0.000907715	0.000907715	0.00899924	Csf1/Ccl2/Ccl5/C3ar1/Ptprj	5
GO:0071677	positive regulation of mononuclear cell migration	5/490	18/11002	0.000907715	0.000907715	0.00899924	Cxcl10/Ccl2/Ccl5/Fpr2/Ccr1	5
GO:0032637	interleukin-8 production	8/490	47/11002	0.000991731	0.000991731	0.00980203	Ptger4/Tlr2/Cd244a/Cd14/Tlr8/Tlr1/Nod2/Nos2	8
GO:0002347	response to tumor cell	4/490	11/11002	0.000998602	0.000998602	0.00983976	Nectin2/Il12b/Cd274/Ulbp1	4
GO:0051817	modulation of process of other organism involved in symbiotic interaction	10/490	70/11002	0.00100358	0.00100358	0.00985865	Tlr2/Ccl4/Ccl5/Irgm1/Tnip1/Hpn/Rest/Igf2r/Irgm2/Hspa8	10
GO:0016049	cell growth	29/490	352/11002	0.00103507	0.00103507	0.0101217	Cxcl16/Cdkn1a/Csf2rb/Nrp2/Sema4a/Dab2/Ifrd1/Sesn2/Mmp14/Actr3/Olfm1/Acvr1b/Hpn/Iqgap1/Sh3bp4/Adam17/Smad4/Bcl6/Ptprj/Trip10/C9orf72/Edn1/Ntn1/Cd38/Unc13a/Zc3h12d/Prkcz/Emp3/Plxna1	29
GO:0048762	mesenchymal cell differentiation	14/490	122/11002	0.00103664	0.00103664	0.0101217	Nrp2/Sema4a/Dab2/Glipr2/Hif1a/Hpn/Smad4/Anxa6/Bambi/Trip10/Edn1/Phldb1/Vasn/Lama5	14
GO:2001242	regulation of intrinsic apoptotic signaling pathway	15/490	136/11002	0.00105005	0.00105005	0.0102216	Herpud1/Bcl2a1d/Ptpn2/Bcl2a1b/Nfe2l2/Bcl2a1a/Hif1a/Sod2/Src/Dnaja1/Plscr1/Plagl2/Bcl2a1c/Nupr1/Creb3l1	15
GO:0001954	positive regulation of cell-matrix adhesion	7/490	37/11002	0.00107077	0.00107077	0.0103919	Sdc4/Csf1/Ppm1f/Cdk6/Iqgap1/Ptprj/Prkcz	7
GO:0045862	positive regulation of proteolysis	23/490	256/11002	0.0010788	0.0010788	0.0104385	Apaf1/Herpud1/Rnf19b/Slc11a2/Tank/Adam9/Plk3/Trib3/Ppm1f/Dab2/Mefv/Mmp14/Tnip1/Hpn/Rest/Src/Hspa8/Sumo1/Nlrp3/Malt1/Jak2/Plk2/Nupr1	23
GO:0010634	positive regulation of epithelial cell migration	12/490	96/11002	0.00110232	0.00110232	0.0106341	Adam9/Nfe2l2/Ppm1f/Glipr2/Cd40/Hif1a/Hmox1/Src/Adam17/Adora2b/Bcar1/Plk2	12
GO:2001234	negative regulation of apoptotic signaling pathway	18/490	180/11002	0.00110714	0.00110714	0.0106487	Hgf/Herpud1/Tnfaip3/Bcl2a1d/Bcl2a1b/Nfe2l2/Dab2/Bcl2a1a/Pea15a/Hif1a/Sod2/Hmox1/Src/Dnaja1/Ing2/Bcl2a1c/Tnfrsf4/Creb3l1	18
GO:0071417	cellular response to organonitrogen compound	29/490	354/11002	0.00113045	0.00113045	0.0108406	Tlr2/Gm9847/Pde4b/Vcam1/Trib3/Ptpn2/Sesn2/Ahr/Eprs/Fcgr2b/Rab8b/Socs1/Nod2/Sh3bp4/Src/Diaph1/Nfkb1/Zfp106/Eif4ebp1/Fpr2/Nr4a3/Foxo1/Zeb1/Nlrp3/Cpeb4/Bcar1/Jak2/Trpm2/Prkcz	29
GO:0042476	odontogenesis	8/490	48/11002	0.0011446	0.0011446	0.010894	Csf1/Snx10/Src/Edn1/Bcor/Id3/Lama5/Nectin1	8
GO:0150076	neuroinflammatory response	8/490	48/11002	0.0011446	0.0011446	0.010894	Tlr2/Ldlr/Nampt/Tlr8/Tlr1/Fpr2/Jak2/Nupr1	8
GO:0007015	actin filament organization	24/490	273/11002	0.00114617	0.00114617	0.010894	Ptger4/Tlr2/Sdc4/Tpm4/Sh3pxd2b/Arap1/Ppm1f/Plek/Actr3/Vasp/Pstpip2/Synpo/Src/Diaph1/Braf/Msrb1/Arpc1b/Rhoc/C9orf72/Fscn1/Bcar1/Rac2/Fhod1/Mical2	24
GO:0010563	negative regulation of phosphorus metabolic process	32/490	405/11002	0.00116785	0.00116785	0.011035	Prr5l/Cdkn1a/Birc3/Hgf/Rnf149/Samsn1/Trib3/Tnfaip3/Parp14/Hipk3/Mvp/Ptpn2/Ppm1f/Dab2/Plek/Hexim1/Ahr/Tnip1/Hpn/Socs1/Iqgap1/Dnaja1/Smad4/Mfhas1/Pdgfa/Ptprj/C9orf72/Foxo1/Irak3/Nup62/Prkcz/Nupr1	32
GO:0045936	negative regulation of phosphate metabolic process	32/490	405/11002	0.00116785	0.00116785	0.011035	Prr5l/Cdkn1a/Birc3/Hgf/Rnf149/Samsn1/Trib3/Tnfaip3/Parp14/Hipk3/Mvp/Ptpn2/Ppm1f/Dab2/Plek/Hexim1/Ahr/Tnip1/Hpn/Socs1/Iqgap1/Dnaja1/Smad4/Mfhas1/Pdgfa/Ptprj/C9orf72/Foxo1/Irak3/Nup62/Prkcz/Nupr1	32
GO:0002755	MyD88-dependent toll-like receptor signaling pathway	5/490	19/11002	0.00118725	0.00118725	0.0110977	Tlr2/Tlr8/Tlr1/Tnip1/Irak3	5
GO:0006925	inflammatory cell apoptotic process	5/490	19/11002	0.00118725	0.00118725	0.0110977	Hcar2/Ccl5/Slc7a11/Fcgr2b/Nod2	5
GO:0090025	regulation of monocyte chemotaxis	5/490	19/11002	0.00118725	0.00118725	0.0110977	Cxcl10/Ccl2/Ccl5/Fpr2/Ccr1	5
GO:0040008	regulation of growth	36/490	474/11002	0.00119447	0.00119447	0.0110977	Cxcl16/Ptger4/Cdkn1a/Csf1/Sh3pxd2b/Csf2rb/Sema4a/Hlx/Ppm1f/Dab2/Ifrd1/Sesn2/Mmp14/Actr3/Ahr/Olfm1/Acvr1b/Hif1a/Hpn/Socs1/Sh3bp4/Adam17/Smad4/Daxx/Ogfr/Bcl6/Ptprj/Trip10/Pnpt1/Edn1/Ntn1/Sav1/Ing2/Cd38/Unc13a/Zc3h12d	36
GO:0042089	cytokine biosynthetic process	11/490	84/11002	0.00119515	0.00119515	0.0110977	Tlr2/Mapkapk2/Tlr8/Irf9/Tlr1/Nfkb1/Icosl/Ifnar1/Ptafr/Jak2/Il27	11
GO:0071887	leukocyte apoptotic process	11/490	84/11002	0.00119515	0.00119515	0.0110977	Hcar2/Cd274/Ccl5/Bcl2a1a/Slc7a11/Fcgr2b/Hif1a/Nod2/Adam17/Nr4a3/Tnfrsf4	11
GO:0097190	apoptotic signaling pathway	35/490	457/11002	0.00120575	0.00120575	0.0111567	Cdkn1a/Hgf/Apaf1/Herpud1/Trib3/Tnfaip3/Bcl2a1d/Ptpn2/Bcl2a1b/Nfe2l2/Ppm1f/Dab2/Bcl2a1a/Traf1/Pea15a/Acvr1b/Hif1a/Sod2/Lcn2/Hmox1/Chac1/Src/Dnaja1/Plscr1/Daxx/Anxa6/Ikbke/Aen/Jak2/Ing2/Plagl2/Bcl2a1c/Tnfrsf4/Nupr1/Creb3l1	35
GO:0016241	regulation of macroautophagy	12/490	97/11002	0.00120843	0.00120843	0.0111567	Tlr2/Irgm1/Sesn2/Chmp4b/Hif1a/Hmox1/Nod2/Optn/Atp6v0a1/Irgm2/C9orf72/Nupr1	12
GO:0032350	regulation of hormone metabolic process	6/490	28/11002	0.00123384	0.00123384	0.0112942	Dab2/Hif1a/Hpn/Rest/Nfkb1/Atp1a1	6
GO:0033028	myeloid cell apoptotic process	6/490	28/11002	0.00123384	0.00123384	0.0112942	Hcar2/Ccl5/Slc7a11/Fcgr2b/Nod2/Adam17	6
GO:1904036	negative regulation of epithelial cell apoptotic process	6/490	28/11002	0.00123384	0.00123384	0.0112942	Tnip2/Tnfaip3/Nfe2l2/Hmox1/Braf/Nupr1	6
GO:0035821	modulation of process of other organism	10/490	72/11002	0.00125303	0.00125303	0.0114374	Tlr2/Ccl4/Ccl5/Irgm1/Tnip1/Hpn/Rest/Igf2r/Irgm2/Hspa8	10
GO:1903202	negative regulation of oxidative stress-induced cell death	7/490	38/11002	0.00126305	0.00126305	0.0114962	Hgf/Nfe2l2/Slc7a11/Hif1a/Sod2/Rest/Nr4a3	7
GO:0071560	cellular response to transforming growth factor beta stimulus	15/490	139/11002	0.00131276	0.00131276	0.0118721	Ccl2/Apaf1/Adam9/Dab2/Actr3/Acvr1b/Hspa5/Src/Adam17/Smad4/Bambi/Cdh5/Zeb1/Ing2/Vasn	15
GO:0002456	T cell mediated immunity	11/490	85/11002	0.00131908	0.00131908	0.0118721	Nectin2/Il12b/Trex1/Ulbp1/Nod2/Il18rap/Stx11/Hspa8/Nlrp3/Malt1/Prkcz	11
GO:0002761	regulation of myeloid leukocyte differentiation	11/490	85/11002	0.00131908	0.00131908	0.0118721	Csf1/Il12b/Ccl5/Ptpn2/Cdk6/Clec2d/Ccl3/Zbtb46/Cd101/Ccr1/Nme2	11
GO:0042107	cytokine metabolic process	11/490	85/11002	0.00131908	0.00131908	0.0118721	Tlr2/Mapkapk2/Tlr8/Irf9/Tlr1/Nfkb1/Icosl/Ifnar1/Ptafr/Jak2/Il27	11
GO:0044403	symbiotic process	24/490	276/11002	0.00133157	0.00133157	0.0119511	Tlr2/Gbp3/Nectin2/Vcam1/Gbp2/Trim30a/Ccl4/Ccl5/Irgm1/Apobec3/Tnip1/Chmp4b/Hpn/Rest/Igf2r/Zc3hav1/Plscr1/Irgm2/Denr/Hspa8/Atg16l2/Slc20a2/Nectin1/Gbp2b	24
GO:0002705	positive regulation of leukocyte mediated immunity	13/490	112/11002	0.00139458	0.00139458	0.0124351	Ccl2/Nectin2/Il12b/Ulbp1/Cd40/Nod2/Il18rap/Hspa8/Adora2b/Nlrp3/Ptafr/Malt1/Prkcz	13
GO:0009266	response to temperature stimulus	13/490	112/11002	0.00139458	0.00139458	0.0124351	Ccl2/Pde4b/Zfp516/Vgf/Hspa5/Hmox1/Dnaja1/Daxx/Eif2s1/Hspa8/Sumo1/Tfec/Trpm2	13
GO:0001667	ameboidal-type cell migration	23/490	261/11002	0.00139707	0.00139707	0.0124351	Prr5l/Sdc4/Nrp2/Adam9/Sema4a/Tns1/Nfe2l2/Ppm1f/Glipr2/Actr3/Cd40/Acvr1b/Hif1a/Hmox1/Src/Adam17/Anxa6/Pip5k1a/Braf/Adora2b/Bcar1/Plk2/Lama5	23
GO:0014910	regulation of smooth muscle cell migration	9/490	61/11002	0.00140806	0.00140806	0.0124626	Ptger4/P2ry2/Ccl5/Nfe2l2/Iqgap1/Src/Pdgfa/Nr4a3/Plxna1	9
GO:0016239	positive regulation of macroautophagy	9/490	61/11002	0.00140806	0.00140806	0.0124626	Tlr2/Irgm1/Sesn2/Hif1a/Hmox1/Nod2/Optn/Irgm2/C9orf72	9
GO:0042098	T cell proliferation	15/490	140/11002	0.00141176	0.00141176	0.0124626	Cd244a/Sdc4/Vcam1/Il12b/Cd274/Ccl5/Tnfsf9/Cd86/Ebi3/Icosl/Rac2/Malt1/Il27/Zc3h12d/Tnfrsf4	15
GO:0010818	T cell chemotaxis	4/490	12/11002	0.0014455	0.0014455	0.0125203	Cxcl16/Cxcl10/Ccl5/Adam17	4
GO:0032494	response to peptidoglycan	4/490	12/11002	0.0014455	0.0014455	0.0125203	Tlr2/Nod2/Nlrp3/Irak3	4
GO:0035812	renal sodium excretion	4/490	12/11002	0.0014455	0.0014455	0.0125203	Ptger4/Anpep/Mllt6/Edn1	4
GO:0038094	Fc-gamma receptor signaling pathway	4/490	12/11002	0.0014455	0.0014455	0.0125203	Fcgr2b/Clec4d/Clec4e/Ptprj	4
GO:0070168	negative regulation of biomineral tissue development	4/490	12/11002	0.0014455	0.0014455	0.0125203	Hif1a/Ccr1/Bcor/Ecm1	4
GO:0110150	negative regulation of biomineralization	4/490	12/11002	0.0014455	0.0014455	0.0125203	Hif1a/Ccr1/Bcor/Ecm1	4
GO:2000482	regulation of interleukin-8 secretion	4/490	12/11002	0.0014455	0.0014455	0.0125203	Tlr2/Cd244a/Cd14/Tlr1	4
GO:1900408	negative regulation of cellular response to oxidative stress	7/490	39/11002	0.00148132	0.00148132	0.0127962	Hgf/Nfe2l2/Slc7a11/Hif1a/Sod2/Rest/Nr4a3	7
GO:2000351	regulation of endothelial cell apoptotic process	6/490	29/11002	0.00149806	0.00149806	0.0129061	Ccl12/Tnip2/Tnfaip3/Nfe2l2/Cd40/Braf	6
GO:0044060	regulation of endocrine process	5/490	20/11002	0.00152569	0.00152569	0.0130396	Hcar2/Dab2/Rab8b/Smad4/Rab11fip1	5
GO:0046885	regulation of hormone biosynthetic process	5/490	20/11002	0.00152569	0.00152569	0.0130396	Dab2/Hif1a/Rest/Nfkb1/Atp1a1	5
GO:0060986	endocrine hormone secretion	5/490	20/11002	0.00152569	0.00152569	0.0130396	Hcar2/Dab2/Rab8b/Smad4/Rab11fip1	5
GO:0030038	contractile actin filament bundle assembly	10/490	74/11002	0.00155084	0.00155084	0.0131499	Ptger4/Sdc4/Sh3pxd2b/Arap1/Ppm1f/Synpo/Src/Braf/Rhoc/Fhod1	10
GO:0032231	regulation of actin filament bundle assembly	10/490	74/11002	0.00155084	0.00155084	0.0131499	Ptger4/Sdc4/Sh3pxd2b/Arap1/Ppm1f/Plek/Synpo/Braf/Rhoc/Fhod1	10
GO:0043149	stress fiber assembly	10/490	74/11002	0.00155084	0.00155084	0.0131499	Ptger4/Sdc4/Sh3pxd2b/Arap1/Ppm1f/Synpo/Src/Braf/Rhoc/Fhod1	10
GO:0051492	regulation of stress fiber assembly	9/490	62/11002	0.00158367	0.00158367	0.0133931	Ptger4/Sdc4/Sh3pxd2b/Arap1/Ppm1f/Synpo/Braf/Rhoc/Fhod1	9
GO:0072593	reactive oxygen species metabolic process	19/490	201/11002	0.00159185	0.00159185	0.013427	Acod1/Ptger4/Tlr2/Cdkn1a/Birc3/Sh3pxd2b/Trim30a/Nfe2l2/Ulbp1/Sesn2/Hif1a/Sod2/Ncf4/Fpr2/Edn1/Foxo1/Eif6/Nos2/Jak2	19
GO:0014070	response to organic cyclic compound	32/490	413/11002	0.00160551	0.00160551	0.0135068	Ccl12/Acod1/Spp1/Il1rn/Pde4b/Ccl5/Adam9/Ifih1/Saa3/Dab2/Cdk6/Ahr/Slc7a11/Socs1/Rest/Nod2/Src/Diaph1/Zc3hav1/Panx1/Dnaja1/Nfkb1/Daxx/Braf/Atp1a1/Eif4ebp1/Nr4a3/Nos2/Jak2/Irak3/Trpm2/Id3	32
GO:0003013	circulatory system process	22/490	248/11002	0.00161768	0.00161768	0.0135738	Pde4b/P2ry2/Ccl4/Trex1/Nampt/Ahr/Hif1a/Sod2/Hmox1/Src/Cdh5/Atp1a1/C3ar1/Sumo1/Adora2b/Sri/Ptprj/Edn1/Nos2/Ptafr/Jak2/Cd38	22
GO:0045637	regulation of myeloid cell differentiation	15/490	142/11002	0.00162864	0.00162864	0.0135949	Csf1/Il12b/Ccl5/Ptpn2/Cdk6/Clec2d/Paf1/Ccl3/Zbtb46/Acvr1b/Hif1a/Cd101/Ccr1/Eif6/Nme2	15
GO:0071559	response to transforming growth factor beta	15/490	142/11002	0.00162864	0.00162864	0.0135949	Ccl2/Apaf1/Adam9/Dab2/Actr3/Acvr1b/Hspa5/Src/Adam17/Smad4/Bambi/Cdh5/Zeb1/Ing2/Vasn	15
GO:0048660	regulation of smooth muscle cell proliferation	13/490	114/11002	0.00164096	0.00164096	0.0136624	Cdkn1a/Il12b/Ccl5/Tnfaip3/Nampt/Hif1a/Sod2/Hmox1/C3ar1/Nr4a3/Edn1/Ptafr/Jak2	13
GO:0048598	embryonic morphogenesis	27/490	330/11002	0.00168709	0.00168709	0.0140103	Sdc4/Il1rn/Vcam1/Itga5/Apaf1/Foxp4/Slc39a1/Tnfaip3/Spint1/Hlx/Mmp14/Zfp281/Paf1/Vasp/Hif1a/Hpn/Rest/Smad4/Arl13b/Nr4a3/Luzp1/Edn1/Phldb1/Zeb1/Ntn1/Ext1/Lama5	27
GO:0061900	glial cell activation	7/490	40/11002	0.00172792	0.00172792	0.0143124	Tlr2/Ldlr/Nampt/Tlr8/Tlr1/Fpr2/Jak2	7
GO:0007169	transmembrane receptor protein tyrosine kinase signaling pathway	27/490	331/11002	0.00176237	0.00176237	0.0145604	Csf1/Rhbdf2/Gm9847/Ccl2/Hgf/Lcp2/Nrp2/Hck/Mapkapk2/Mvp/Ptpn2/Hif1a/Socs1/Iqgap1/Src/Adam17/Pdgfa/Zfp106/Eif4ebp1/Ptprj/Nr4a3/Foxo1/Bcar1/Jak2/Nup62/Prkcz/Creb3l1	27
GO:0007229	integrin-mediated signaling pathway	9/490	63/11002	0.00177645	0.00177645	0.0145671	Itga5/Dab2/Plek/Src/Fyb/Bcar1/Nme2/Itga2b/Lama5	9
GO:0007160	cell-matrix adhesion	14/490	129/11002	0.00178127	0.00178127	0.0145671	Sdc4/Csf1/Vcam1/Adam9/Ppm1f/Cdk6/Mmp14/Iqgap1/Src/Pip5k1a/Bcl6/Ptprj/Prkcz/Itga2b	14
GO:0030278	regulation of ossification	14/490	129/11002	0.00178127	0.00178127	0.0145671	Ptger4/Noct/Csf1/P2ry2/Cdk6/Pdlim7/Ahr/Hif1a/Rest/Ccr1/Bcor/Ecm1/Id3/Creb3l1	14
GO:0050866	negative regulation of cell activation	14/490	129/11002	0.00178127	0.00178127	0.0145671	Ldlr/Sdc4/Cd274/Samsn1/Tnfaip3/Hlx/Ptpn2/Fcgr2b/Socs1/Hmox1/Cd86/Pdgfa/Bcl6/Zc3h12d	14
GO:0042531	positive regulation of tyrosine phosphorylation of STAT protein	6/490	30/11002	0.00180324	0.00180324	0.0146353	Ptger4/Il12b/Ccl5/Parp14/Cd40/Jak2	6
GO:0090303	positive regulation of wound healing	6/490	30/11002	0.00180324	0.00180324	0.0146353	Ptger4/Ccl2/Nfe2l2/Plek/Ptprj/Enpp4	6
GO:1902930	regulation of alcohol biosynthetic process	6/490	30/11002	0.00180324	0.00180324	0.0146353	Cd244a/Dab2/Plek/Rest/Nfkb1/Ptafr	6
GO:0032479	regulation of type I interferon production	10/490	76/11002	0.00190364	0.00190364	0.0153696	Acod1/Tlr2/Relb/Cd14/Trex1/Ifih1/Tlr8/Zc3hav1/Traf3/Ifnar1	10
GO:1904019	epithelial cell apoptotic process	10/490	76/11002	0.00190364	0.00190364	0.0153696	Ccl12/Tnip2/Tnfaip3/Nfe2l2/Cd40/Hmox1/Eif2s1/Braf/Jak2/Nupr1	10
GO:0006914	autophagy	27/490	333/11002	0.00192164	0.00192164	0.0153696	Tlr2/Trim30a/Plk3/Trib3/Tnfaip3/Dram1/Nampt/Irgm1/Mefv/Sesn2/Chmp4b/Hif1a/Sqstm1/Hmox1/Nod2/Sh3bp4/Optn/Atp6v0a1/Irgm2/Fnbp1l/Hspa8/Atg16l2/C9orf72/Foxo1/Ubxn2a/Plk2/Nupr1	27
GO:0061919	process utilizing autophagic mechanism	27/490	333/11002	0.00192164	0.00192164	0.0153696	Tlr2/Trim30a/Plk3/Trib3/Tnfaip3/Dram1/Nampt/Irgm1/Mefv/Sesn2/Chmp4b/Hif1a/Sqstm1/Hmox1/Nod2/Sh3bp4/Optn/Atp6v0a1/Irgm2/Fnbp1l/Hspa8/Atg16l2/C9orf72/Foxo1/Ubxn2a/Plk2/Nupr1	27
GO:0002695	negative regulation of leukocyte activation	13/490	116/11002	0.00192233	0.00192233	0.0153696	Ldlr/Sdc4/Cd274/Samsn1/Tnfaip3/Hlx/Ptpn2/Fcgr2b/Socs1/Hmox1/Cd86/Bcl6/Zc3h12d	13
GO:0048659	smooth muscle cell proliferation	13/490	116/11002	0.00192233	0.00192233	0.0153696	Cdkn1a/Il12b/Ccl5/Tnfaip3/Nampt/Hif1a/Sod2/Hmox1/C3ar1/Nr4a3/Edn1/Ptafr/Jak2	13
GO:0043372	positive regulation of CD4-positive, alpha-beta T cell differentiation	5/490	21/11002	0.00193006	0.00193006	0.0153932	Hlx/Socs1/Nlrp3/Malt1/Prkcz	5
GO:0048008	platelet-derived growth factor receptor signaling pathway	8/490	52/11002	0.00195369	0.00195369	0.0155432	Ptpn2/Iqgap1/Src/Pdgfa/Ptprj/Nr4a3/Bcar1/Jak2	8
GO:0010656	negative regulation of muscle cell apoptotic process	7/490	41/11002	0.00200525	0.00200525	0.0158743	Nfe2l2/Hmox1/Hspa8/Trip10/Edn1/Jak2/Nupr1	7
GO:1903036	positive regulation of response to wounding	7/490	41/11002	0.00200525	0.00200525	0.0158743	Ptger4/Ccl2/Nfe2l2/Plek/Braf/Ptprj/Enpp4	7
GO:0030194	positive regulation of blood coagulation	4/490	13/11002	0.00201502	0.00201502	0.0158743	Nfe2l2/Plek/Ptprj/Enpp4	4
GO:1900048	positive regulation of hemostasis	4/490	13/11002	0.00201502	0.00201502	0.0158743	Nfe2l2/Plek/Ptprj/Enpp4	4
GO:0007179	transforming growth factor beta receptor signaling pathway	13/490	117/11002	0.00207728	0.00207728	0.016325	Ccl2/Adam9/Dab2/Acvr1b/Hspa5/Src/Adam17/Smad4/Bambi/Cdh5/Zeb1/Ing2/Vasn	13
GO:0034220	ion transmembrane transport	35/490	472/11002	0.00208863	0.00208863	0.0163742	Cxcl10/Slc39a14/Gpr35/Ccl2/Pde4b/Slc7a1/Clic4/Slc11a2/Slc39a1/Slc31a1/Lrrc8c/Hvcn1/Ahr/Slc38a2/Slc7a11/Lrrc8b/Kcnh4/Hpn/Diaph1/Panx1/Slc30a4/Anxa6/Atp6v0a1/Slc12a4/Slc7a5/Atp1a1/Sumo1/Sri/Slc20a2/Slc7a7/Kcnj9/Ptafr/Trpm2/Mcoln2/Slc25a10	35
GO:0046634	regulation of alpha-beta T cell activation	10/490	77/11002	0.00210288	0.00210288	0.016401	Cd244a/Il12b/Cd274/Hlx/Socs1/Bcl6/Nlrp3/Malt1/Il27/Prkcz	10
GO:0002824	positive regulation of adaptive immune response based on somatic recombination of immune receptors built from immunoglobulin superfamily domains	11/490	90/11002	0.00210733	0.00210733	0.016401	Nectin2/Il12b/Cd274/Hlx/Cd40/Nod2/Hspa8/Nlrp3/Malt1/Prkcz/Il27ra	11
GO:0050729	positive regulation of inflammatory response	11/490	90/11002	0.00210733	0.00210733	0.016401	Ptger4/Tlr2/Ldlr/Gbp5/Ccl5/Ccl3/Tnip1/Nod2/Adora2b/Jak2/Nupr1	11
GO:0009896	positive regulation of catabolic process	28/490	352/11002	0.00211329	0.00211329	0.0164078	Prr5l/Tlr2/Ldlr/Herpud1/Trim30a/Rnf19b/Adam9/Plk3/Trib3/Tnfaip3/Dab2/Irgm1/Mefv/Sesn2/Hif1a/Hmox1/Nod2/Sh3bp4/Zc3hav1/Optn/Irgm2/Sumo1/C9orf72/Pnpt1/Foxo1/Zc3h12d/Plk2/Nupr1	28
GO:0006111	regulation of gluconeogenesis	6/490	31/11002	0.0021533	0.0021533	0.0165589	Sik1/Ptpn2/Ranbp2/Sesn2/Hif1a/Foxo1	6
GO:0034122	negative regulation of toll-like receptor signaling pathway	6/490	31/11002	0.0021533	0.0021533	0.0165589	Acod1/Trim30a/Tnfaip3/Nod2/Mfhas1/Irak3	6
GO:0051055	negative regulation of lipid biosynthetic process	6/490	31/11002	0.0021533	0.0021533	0.0165589	Sik1/Trib3/Rest/Nfkb1/Atp1a1/Pdgfa	6
GO:0072577	endothelial cell apoptotic process	6/490	31/11002	0.0021533	0.0021533	0.0165589	Ccl12/Tnip2/Tnfaip3/Nfe2l2/Cd40/Braf	6
GO:0034121	regulation of toll-like receptor signaling pathway	8/490	53/11002	0.00221334	0.00221334	0.0169769	Acod1/Tlr2/Trim30a/Tnfaip3/Tlr1/Nod2/Mfhas1/Irak3	8
GO:0014909	smooth muscle cell migration	9/490	65/11002	0.0022182	0.0022182	0.0169769	Ptger4/P2ry2/Ccl5/Nfe2l2/Iqgap1/Src/Pdgfa/Nr4a3/Plxna1	9
GO:0036293	response to decreased oxygen levels	15/490	147/11002	0.00229546	0.00229546	0.0175265	Slc11a2/Plk3/Nfe2l2/Hif1a/Rest/Hmox1/Adam17/Smad4/Eif4ebp1/Edn1/Nos2/Cpeb4/Vasn/Cd38/Suv39h2	15
GO:0010659	cardiac muscle cell apoptotic process	7/490	42/11002	0.0023158	0.0023158	0.0175368	Apaf1/Nfe2l2/Smad4/Hspa8/Trip10/Jak2/Nupr1	7
GO:0046427	positive regulation of receptor signaling pathway via JAK-STAT	7/490	42/11002	0.0023158	0.0023158	0.0175368	Ptger4/Il12b/Ccl5/Parp14/Cd40/Socs1/Jak2	7
GO:1902883	negative regulation of response to oxidative stress	7/490	42/11002	0.0023158	0.0023158	0.0175368	Hgf/Nfe2l2/Slc7a11/Hif1a/Sod2/Rest/Nr4a3	7
GO:0045621	positive regulation of lymphocyte differentiation	10/490	78/11002	0.00231857	0.00231857	0.0175368	Tnfsf9/Hlx/Mmp14/Il15ra/Socs1/Bcl6/Nlrp3/Pik3r6/Malt1/Prkcz	10
GO:2001233	regulation of apoptotic signaling pathway	26/490	321/11002	0.00234749	0.00234749	0.0177139	Hgf/Apaf1/Herpud1/Tnfaip3/Bcl2a1d/Ptpn2/Bcl2a1b/Nfe2l2/Dab2/Bcl2a1a/Traf1/Pea15a/Hif1a/Sod2/Hmox1/Src/Dnaja1/Plscr1/Daxx/Jak2/Ing2/Plagl2/Bcl2a1c/Tnfrsf4/Nupr1/Creb3l1	26
GO:0051345	positive regulation of hydrolase activity	29/490	372/11002	0.00239286	0.00239286	0.0179934	Ccl12/Ccl2/Ccl22/Apaf1/Ccl4/Ccl9/Ccl5/Slc11a2/Tank/Arap1/Ppm1f/Mefv/Plek/Ccl3/Cd40/Rest/Zc3hav1/Plscr1/Tbc1d1/Pip5k1a/Rhoc/Ric1/Nlrp3/Ccl7/Ptafr/Malt1/Jak2/Tbc1d30/Prkcz	29
GO:0048863	stem cell differentiation	12/490	105/11002	0.00240059	0.00240059	0.0179934	Batf/Nrp2/Sema4a/Nfe2l2/Cdk6/Zfp281/Hif1a/Rest/Smad4/Anxa6/Edn1/Lama5	12
GO:0019216	regulation of lipid metabolic process	20/490	224/11002	0.00240128	0.00240128	0.0179934	Hcar2/Fabp5/Ldlr/Sik1/Trex1/Pik3r5/Trib3/Dab2/Rest/Nod2/Src/Nfkb1/Ctdnep1/Atp1a1/Pdgfa/Adora2b/Fpr2/Nr4a3/Eif6/Stard4	20
GO:0007588	excretion	5/490	22/11002	0.00240752	0.00240752	0.0179983	Ptger4/Dab2/Anpep/Mllt6/Edn1	5
GO:0001525	angiogenesis	26/490	322/11002	0.00245019	0.00245019	0.0182749	Ccl12/Cxcl10/Ccl2/Hgf/Itga5/Clic4/Nrp2/Ccl5/Sema4a/Mmp19/Nfe2l2/Anpep/Tnfaip2/Ncl/Ahr/Cd40/Hif1a/Hmox1/Cdh5/Pdgfa/C3ar1/Edn1/Pik3r6/Ecm1/Plk2/Creb3l1	26
GO:0043405	regulation of MAP kinase activity	19/490	209/11002	0.00249235	0.00249235	0.0185465	Il1rn/Hgf/Pik3r5/Adam9/Trib3/Hipk3/Dab2/Cd40/Iqgap1/Nod2/Src/Dnaja1/Pdgfa/Ptprj/Edn1/Pik3r6/Jak2/Irak3/Nup62	19
GO:0042108	positive regulation of cytokine biosynthetic process	8/490	54/11002	0.00249934	0.00249934	0.0185556	Tlr2/Mapkapk2/Tlr8/Tlr1/Icosl/Ptafr/Jak2/Il27	8
GO:0001952	regulation of cell-matrix adhesion	10/490	79/11002	0.00255168	0.00255168	0.0187755	Sdc4/Csf1/Ppm1f/Cdk6/Mmp14/Iqgap1/Src/Bcl6/Ptprj/Prkcz	10
GO:0002715	regulation of natural killer cell mediated immunity	6/490	32/11002	0.00255227	0.00255227	0.0187755	Nectin2/Il12b/Ulbp1/Clec2d/Il18rap/Pik3r6	6
GO:0042269	regulation of natural killer cell mediated cytotoxicity	6/490	32/11002	0.00255227	0.00255227	0.0187755	Nectin2/Il12b/Ulbp1/Clec2d/Il18rap/Pik3r6	6
GO:1901998	toxin transport	6/490	32/11002	0.00255227	0.00255227	0.0187755	Cd274/Mtmr12/Hspa5/Dnaja1/Atp6v0a1/Crtc2	6
GO:0051480	regulation of cytosolic calcium ion concentration	17/490	179/11002	0.00261785	0.00261785	0.0192141	Cxcl10/Ptger4/Ccrl2/Gpr35/P2ry2/Gpr18/Ccl3/Synpo/Diaph1/C3ar1/Sri/Fpr2/Edn1/Ccr1/Jak2/Cd38/Trpm2	17
GO:0032720	negative regulation of tumor necrosis factor production	7/490	43/11002	0.00266215	0.00266215	0.0194506	Ptger4/Trim30a/Tnfaip3/Gpr18/Nod2/Irak3/Il27ra	7
GO:0072678	T cell migration	7/490	43/11002	0.00266215	0.00266215	0.0194506	Cxcl16/Cxcl10/Ccl2/Ccl5/Adam17/Ecm1/Il27ra	7
GO:0001568	blood vessel development	33/490	444/11002	0.00267541	0.00267541	0.0195033	Ccl12/Cxcl10/Ptger4/Ldlr/Ccl2/Hgf/Itga5/Clic4/Nrp2/Ccl5/Trex1/Spint1/Sema4a/Mmp19/Nfe2l2/Anpep/Tnfaip2/Ncl/Ahr/Cd40/Hif1a/Hmox1/Cdh5/Pdgfa/C3ar1/Ptprj/Luzp1/Edn1/Foxo1/Pik3r6/Ecm1/Plk2/Creb3l1	33
GO:0002467	germinal center formation	4/490	14/11002	0.00272264	0.00272264	0.0195818	Nfkb2/Tnfaip3/Adam17/Bcl6	4
GO:0022403	cell cycle phase	4/490	14/11002	0.00272264	0.00272264	0.0195818	Piwil2/Sycp2/Trex1/Cdk6	4
GO:0035743	CD4-positive, alpha-beta T cell cytokine production	4/490	14/11002	0.00272264	0.00272264	0.0195818	Il12b/Il18rap/Nlrp3/Prkcz	4
GO:0044546	NLRP3 inflammasome complex assembly	4/490	14/11002	0.00272264	0.00272264	0.0195818	Gbp5/Trim30a/Mefv/Nlrp3	4
GO:0051482	positive regulation of cytosolic calcium ion concentration involved in phospholipase C-activating G protein-coupled signaling pathway	4/490	14/11002	0.00272264	0.00272264	0.0195818	Gpr35/Gpr18/C3ar1/Edn1	4
GO:2000773	negative regulation of cellular senescence	4/490	14/11002	0.00272264	0.00272264	0.0195818	Nampt/Cdk6/Bcl6/Plk2	4
GO:0000041	transition metal ion transport	9/490	67/11002	0.0027432	0.0027432	0.019642	Slc39a14/Fth1/Slc11a2/Slc39a1/Slc31a1/Lcn2/Slc30a4/Trpm2/Nectin1	9
GO:0046916	cellular transition metal ion homeostasis	9/490	67/11002	0.0027432	0.0027432	0.019642	Slc39a14/Fth1/Slc11a2/Slc31a1/Hif1a/Lcn2/Hmox1/Slc30a4/Smad4	9
GO:0022612	gland morphogenesis	10/490	80/11002	0.0028032	0.0028032	0.0199827	Csf1/Hgf/Tnfaip3/Hpn/Src/Pdgfa/Ntn1/Tet2/Lama5/Plxna1	10
GO:0050852	T cell receptor signaling pathway	10/490	80/11002	0.0028032	0.0028032	0.0199827	Pde4b/Nectin2/Lcp2/Bcl2a1d/Ptpn2/Icosl/Braf/Ptprj/Fyb/Malt1	10
GO:0010667	negative regulation of cardiac muscle cell apoptotic process	5/490	23/11002	0.0029653	0.0029653	0.0209529	Nfe2l2/Hspa8/Trip10/Jak2/Nupr1	5
GO:0045672	positive regulation of osteoclast differentiation	5/490	23/11002	0.0029653	0.0029653	0.0209529	Csf1/Il12b/Ccl5/Ccl3/Ccr1	5
GO:0046006	regulation of activated T cell proliferation	5/490	23/11002	0.0029653	0.0029653	0.0209529	Il12b/Cd274/Tnfsf9/Cd86/Icosl	5
GO:0055078	sodium ion homeostasis	5/490	23/11002	0.0029653	0.0029653	0.0209529	Ptger4/Anpep/Mllt6/Atp1a1/Edn1	5
GO:0071900	regulation of protein serine/threonine kinase activity	25/490	310/11002	0.00299332	0.00299332	0.0209776	Cdkn1a/Il1rn/Hgf/Pik3r5/Adam9/Trib3/Tnfaip3/Hipk3/Dab2/Sesn2/Hexim1/Cd40/Iqgap1/Nod2/Src/Adam17/Dnaja1/Irgm2/Pdgfa/Ptprj/Edn1/Pik3r6/Jak2/Irak3/Nup62	25
GO:0002753	cytoplasmic pattern recognition receptor signaling pathway	6/490	33/11002	0.00300426	0.00300426	0.0209776	Tnfaip3/Ifih1/Alpk1/Nod2/Zc3hav1/Irgm2	6
GO:1905521	regulation of macrophage migration	6/490	33/11002	0.00300426	0.00300426	0.0209776	Csf1/Ccl2/Ccl5/Mmp14/C3ar1/Ptprj	6
GO:2000772	regulation of cellular senescence	6/490	33/11002	0.00300426	0.00300426	0.0209776	Nampt/Cdk6/Bcl6/Pnpt1/Ing2/Plk2	6
GO:0048871	multicellular organismal homeostasis	23/490	277/11002	0.00301077	0.00301077	0.0209776	Fabp5/Ptger4/Spp1/Csf1/Il1rn/Ccl5/Slc11a2/Snx10/Zfp516/Gatm/Chmp4b/Lcn2/Nod2/Src/Adam17/Nr4a3/Elovl6/Prkab2/Rac2/Jak2/Cd38/Trpm2/Grhl1	23
GO:0050731	positive regulation of peptidyl-tyrosine phosphorylation	13/490	122/11002	0.00301424	0.00301424	0.0209776	Ptger4/Hgf/Itga5/Il12b/Ccl5/Parp14/Cd40/Iqgap1/Nod2/Src/Adam17/Ptprj/Jak2	13
GO:0006937	regulation of muscle contraction	9/490	68/11002	0.00304018	0.00304018	0.0209776	Ptger4/Pde4b/Anxa6/Atp1a1/Sumo1/Adora2b/Sri/Edn1/Ptafr	9
GO:0006094	gluconeogenesis	7/490	44/11002	0.00304692	0.00304692	0.0209776	Sik1/Ptpn2/Ranbp2/Sesn2/Hif1a/Crtc2/Foxo1	7
GO:0006801	superoxide metabolic process	7/490	44/11002	0.00304692	0.00304692	0.0209776	Sh3pxd2b/Nfe2l2/Sod2/Ncf4/Fpr2/Edn1/Nos2	7
GO:0014033	neural crest cell differentiation	7/490	44/11002	0.00304692	0.00304692	0.0209776	Nrp2/Sema4a/Hif1a/Smad4/Anxa6/Edn1/Lama5	7
GO:0032233	positive regulation of actin filament bundle assembly	7/490	44/11002	0.00304692	0.00304692	0.0209776	Sdc4/Sh3pxd2b/Ppm1f/Plek/Synpo/Braf/Rhoc	7
GO:0032677	regulation of interleukin-8 production	7/490	44/11002	0.00304692	0.00304692	0.0209776	Ptger4/Tlr2/Cd244a/Cd14/Tlr8/Tlr1/Nod2	7
GO:0001889	liver development	10/490	81/11002	0.00307415	0.00307415	0.021075	Hgf/Tnfaip3/Hlx/Ahr/Sod2/Hpn/Hmox1/Igf2r/Man2a1/Tet2	10
GO:0055067	monovalent inorganic cation homeostasis	10/490	81/11002	0.00307415	0.00307415	0.021075	Ptger4/Clic4/Atp6v0c/Anpep/Mllt6/Atp6v0a1/Slc12a4/Atp1a1/Edn1/Slc4a3	10
GO:0001944	vasculature development	34/490	466/11002	0.0031221	0.0031221	0.0213582	Ccl12/Cxcl10/Ptger4/Ldlr/Ccl2/Hgf/Itga5/Clic4/Nrp2/Ccl5/Trex1/Spint1/Sema4a/Mmp19/Nfe2l2/Anpep/Tnfaip2/Ncl/Ahr/Cd40/Hif1a/Sod2/Hmox1/Cdh5/Pdgfa/C3ar1/Ptprj/Luzp1/Edn1/Foxo1/Pik3r6/Ecm1/Plk2/Creb3l1	34
GO:0010675	regulation of cellular carbohydrate metabolic process	11/490	95/11002	0.00324142	0.00324142	0.0221275	Cd244a/Sik1/Ptpn2/Ranbp2/Plek/Sesn2/Hif1a/Src/Foxo1/Ptafr/Nupr1	11
GO:0010565	regulation of cellular ketone metabolic process	10/490	82/11002	0.00336557	0.00336557	0.0228781	Fabp5/Trex1/Trib3/Dab2/Slc7a11/Rest/Nr4a3/Slc7a7/Eif6/Stard4	10
GO:0016064	immunoglobulin mediated immune response	10/490	82/11002	0.00336557	0.00336557	0.0228781	Batf/Nectin2/Trex1/Cd40/Fcgr2b/Nod2/Icosl/Bcl6/Il27ra/C1rl	10
GO:0009991	response to extracellular stimulus	21/490	247/11002	0.0034045	0.0034045	0.023094	Ldlr/Cdkn1a/Noct/Spp1/Sik1/Vcam1/Nfe2l2/Vgf/Sesn2/Gatm/Hspa5/Asns/Sod2/Panx1/Eif2s1/Plec/Adora2b/Eif4ebp1/Foxo1/Cpeb4/Wdr59	21
GO:1901653	cellular response to peptide	19/490	215/11002	0.00341994	0.00341994	0.02315	Gm9847/Vcam1/Trib3/Ptpn2/Eprs/Fcgr2b/Rab8b/Socs1/Nod2/Src/Nfkb1/Zfp106/Eif4ebp1/Fpr2/Nr4a3/Foxo1/Bcar1/Jak2/Prkcz	19
GO:0010658	striated muscle cell apoptotic process	7/490	45/11002	0.00347281	0.00347281	0.0234586	Apaf1/Nfe2l2/Smad4/Hspa8/Trip10/Jak2/Nupr1	7
GO:0001960	negative regulation of cytokine-mediated signaling pathway	6/490	34/11002	0.00351346	0.00351346	0.023617	Il1rn/Trex1/Parp14/Ptpn2/Irak3/Ecm1	6
GO:0033003	regulation of mast cell activation	6/490	34/11002	0.00351346	0.00351346	0.023617	Nectin2/Hmox1/Plscr1/Adora2b/Nr4a3/Rac2	6
GO:0002821	positive regulation of adaptive immune response	11/490	96/11002	0.00351824	0.00351824	0.023617	Nectin2/Il12b/Cd274/Hlx/Cd40/Nod2/Hspa8/Nlrp3/Malt1/Prkcz/Il27ra	11
GO:1903201	regulation of oxidative stress-induced cell death	8/490	57/11002	0.00353348	0.00353348	0.02367	Hgf/Nfe2l2/Slc7a11/Hif1a/Sod2/Rest/Nr4a3/Trpm2	8
GO:0008360	regulation of cell shape	12/490	110/11002	0.00354213	0.00354213	0.0236787	Ccl12/Ccl2/Hck/Fmnl2/Sema4a/Arap1/Ccl3/Hpn/Diaph1/Bambi/Rhoc/Plxna1	12
GO:0002431	Fc receptor mediated stimulatory signaling pathway	4/490	15/11002	0.00358343	0.00358343	0.0237428	Fcgr2b/Plscr1/Ptprj/Nr4a3	4
GO:0045624	positive regulation of T-helper cell differentiation	4/490	15/11002	0.00358343	0.00358343	0.0237428	Hlx/Nlrp3/Malt1/Prkcz	4
GO:0060445	branching involved in salivary gland morphogenesis	4/490	15/11002	0.00358343	0.00358343	0.0237428	Hgf/Pdgfa/Lama5/Plxna1	4
GO:2000352	negative regulation of endothelial cell apoptotic process	4/490	15/11002	0.00358343	0.00358343	0.0237428	Tnip2/Tnfaip3/Nfe2l2/Braf	4
GO:0000302	response to reactive oxygen species	15/490	154/11002	0.00359615	0.00359615	0.0237428	Hgf/Trex1/Adam9/Plk3/Tnfaip3/Nfe2l2/Sesn2/Sod2/Lcn2/Hmox1/Src/Nr4a3/Foxo1/Bcar1/Trpm2	15
GO:0034329	cell junction assembly	20/490	232/11002	0.00359925	0.00359925	0.0237428	Tlr2/Sdc4/Lrrc4/Itga5/Sema4a/Tns1/Ppm1f/Mmp14/Actr3/Iqgap1/Src/Cdh5/Pip5k1a/Plec/Ptprj/Rhoc/Fscn1/Ntn1/Dst/Nectin1	20
GO:0010758	regulation of macrophage chemotaxis	5/490	24/11002	0.00361068	0.00361068	0.0237428	Csf1/Ccl2/Ccl5/C3ar1/Ptprj	5
GO:0071353	cellular response to interleukin-4	5/490	24/11002	0.00361068	0.00361068	0.0237428	Nfil3/Parp14/Ptpn2/Hspa5/Impdh2	5
GO:0001909	leukocyte mediated cytotoxicity	10/490	83/11002	0.00367853	0.00367853	0.024018	Ccl2/Nectin2/Il12b/Rnf19b/Ulbp1/Clec2d/Il18rap/Stx11/Hspa8/Pik3r6	10
GO:0061008	hepaticobiliary system development	10/490	83/11002	0.00367853	0.00367853	0.024018	Hgf/Tnfaip3/Hlx/Ahr/Sod2/Hpn/Hmox1/Igf2r/Man2a1/Tet2	10
GO:0010817	regulation of hormone levels	22/490	265/11002	0.0036804	0.0036804	0.024018	Hcar2/Ptger4/Spp1/Il1rn/Ccl5/Dab2/Vgf/Nadk/Rab8b/Hif1a/Hpn/Rest/Smad4/Nfkb1/Atp1a1/Sri/Edn1/Nos2/Jak2/Cd38/Trpm2/Rab11fip1	22
GO:0008610	lipid biosynthetic process	28/490	366/11002	0.00368234	0.00368234	0.024018	Fabp5/Ldlr/B4galt5/Ch25h/Sik1/Trex1/Trib3/Dab2/Pgs1/Ptges/Rest/Plscr1/Nfkb1/Pip5k1a/Ctdnep1/Atp1a1/Pdgfa/Adora2b/Fpr2/Elovl6/Edn1/Prkab2/Eif6/St3gal4/Sqle/Stard4/Fads2/Lpcat4	28
GO:0046677	response to antibiotic	16/490	170/11002	0.00377674	0.00377674	0.0245839	Hgf/Adam9/Tnfaip3/Nfe2l2/Ahr/Hif1a/Sod2/Lcn2/Hmox1/Src/Daxx/Nr4a3/Ccl7/Jak2/Trpm2/Id3	16
GO:0030001	metal ion transport	33/490	454/11002	0.00378487	0.00378487	0.0245872	Ccl12/Cxcl10/Slc39a14/Gpr35/Pde4b/Sik1/Ccl4/Fth1/Ccl5/Slc11a2/Slc39a1/Slc31a1/Ahr/Slc38a2/Kcnh4/Mllt6/Hpn/Lcn2/Diaph1/Panx1/Slc30a4/Anxa6/Slc12a4/Atp1a1/Sumo1/Sri/Slc41a2/Slc20a2/Ccr1/Kcnj9/Trpm2/Mcoln2/Nectin1	33
GO:0060485	mesenchyme development	14/490	140/11002	0.00381217	0.00381217	0.0245906	Nrp2/Sema4a/Dab2/Glipr2/Hif1a/Hpn/Smad4/Anxa6/Bambi/Trip10/Edn1/Phldb1/Vasn/Lama5	14
GO:0008630	intrinsic apoptotic signaling pathway in response to DNA damage	11/490	97/11002	0.00381369	0.00381369	0.0245906	Cdkn1a/Bcl2a1d/Bcl2a1b/Bcl2a1a/Sod2/Hmox1/Plscr1/Ikbke/Aen/Bcl2a1c/Nupr1	11
GO:0042129	regulation of T cell proliferation	12/490	111/11002	0.00381592	0.00381592	0.0245906	Cd244a/Sdc4/Vcam1/Il12b/Cd274/Ccl5/Tnfsf9/Cd86/Icosl/Rac2/Il27/Zc3h12d	12
GO:0061138	morphogenesis of a branching epithelium	12/490	111/11002	0.00381592	0.00381592	0.0245906	Csf1/Hgf/Clic4/Spint1/Mmp14/Ahr/Src/Smad4/Pdgfa/Edn1/Lama5/Plxna1	12
GO:0030162	regulation of proteolysis	33/490	455/11002	0.00391476	0.00391476	0.0251772	Birc3/Hgf/Apaf1/Herpud1/Rnf19b/Slc11a2/Tank/Adam9/Plk3/Trib3/Spint1/Bcl2a1d/Ppm1f/Dab2/Mefv/Mmp14/N4bp1/Tnip1/Hpn/Serpina3f/Rest/Chac1/Src/Traf3/Hspa8/Sumo1/Nlrp3/Malt1/Jak2/Ecm1/Plk2/Serpina3g/Nupr1	33
GO:1904894	positive regulation of receptor signaling pathway via STAT	7/490	46/11002	0.00394256	0.00394256	0.0252089	Ptger4/Il12b/Ccl5/Parp14/Cd40/Socs1/Jak2	7
GO:2000401	regulation of lymphocyte migration	7/490	46/11002	0.00394256	0.00394256	0.0252089	Ccl12/Cxcl10/Ccl4/Ccl5/Adam17/Ecm1/Il27ra	7
GO:0032963	collagen metabolic process	8/490	58/11002	0.00394317	0.00394317	0.0252089	Ccl2/Mmp19/Mmp14/Mmp13/Hif1a/Tram2/Adora2b/Creb3l1	8
GO:1904018	positive regulation of vasculature development	13/490	126/11002	0.00399023	0.00399023	0.0254593	Hgf/Itga5/Ccl5/Nfe2l2/Cd40/Hif1a/Sod2/Hmox1/Cdh5/C3ar1/Pik3r6/Ecm1/Plk2	13
GO:0072358	cardiovascular system development	34/490	474/11002	0.00407947	0.00407947	0.025761	Ccl12/Cxcl10/Ptger4/Ldlr/Ccl2/Hgf/Itga5/Clic4/Nrp2/Ccl5/Trex1/Spint1/Sema4a/Mmp19/Nfe2l2/Anpep/Tnfaip2/Ncl/Ahr/Cd40/Hif1a/Sod2/Hmox1/Cdh5/Pdgfa/C3ar1/Ptprj/Luzp1/Edn1/Foxo1/Pik3r6/Ecm1/Plk2/Creb3l1	34
GO:0007200	phospholipase C-activating G protein-coupled receptor signaling pathway	6/490	35/11002	0.00408411	0.00408411	0.025761	Gpr35/P2ry2/Gpr18/C3ar1/Fpr2/Edn1	6
GO:0042149	cellular response to glucose starvation	6/490	35/11002	0.00408411	0.00408411	0.025761	Sik1/Nfe2l2/Sesn2/Hspa5/Asns/Cpeb4	6
GO:0043392	negative regulation of DNA binding	6/490	35/11002	0.00408411	0.00408411	0.025761	Rest/Hmox1/Sumo1/Sri/Jak2/Id3	6
GO:0050886	endocrine process	6/490	35/11002	0.00408411	0.00408411	0.025761	Hcar2/Dab2/Rab8b/Smad4/Edn1/Rab11fip1	6
GO:0051606	detection of stimulus	9/490	71/11002	0.00408548	0.00408548	0.025761	Tlr2/Trex1/Tlr1/Sod2/Hpn/Rest/Nod2/Dnaja1/Cabp4	9
GO:0051250	negative regulation of lymphocyte activation	11/490	98/11002	0.00412862	0.00412862	0.0259821	Sdc4/Cd274/Samsn1/Tnfaip3/Hlx/Ptpn2/Fcgr2b/Socs1/Cd86/Bcl6/Zc3h12d	11
GO:0048514	blood vessel morphogenesis	29/490	387/11002	0.00422747	0.00422747	0.0265523	Ccl12/Cxcl10/Ptger4/Ldlr/Ccl2/Hgf/Itga5/Clic4/Nrp2/Ccl5/Sema4a/Mmp19/Nfe2l2/Anpep/Tnfaip2/Ncl/Ahr/Cd40/Hif1a/Hmox1/Cdh5/Pdgfa/C3ar1/Ptprj/Edn1/Pik3r6/Ecm1/Plk2/Creb3l1	29
GO:0032958	inositol phosphate biosynthetic process	5/490	25/11002	0.00435092	0.00435092	0.0271163	Cd244a/Plek/Itpkc/Ptafr/Ip6k3	5
GO:0070670	response to interleukin-4	5/490	25/11002	0.00435092	0.00435092	0.0271163	Nfil3/Parp14/Ptpn2/Hspa5/Impdh2	5
GO:1903523	negative regulation of blood circulation	5/490	25/11002	0.00435092	0.00435092	0.0271163	Ahr/Hif1a/Atp1a1/Sri/Jak2	5
GO:2000516	positive regulation of CD4-positive, alpha-beta T cell activation	5/490	25/11002	0.00435092	0.00435092	0.0271163	Hlx/Socs1/Nlrp3/Malt1/Prkcz	5
GO:0019724	B cell mediated immunity	10/490	85/11002	0.00437346	0.00437346	0.0271517	Batf/Nectin2/Trex1/Cd40/Fcgr2b/Nod2/Icosl/Bcl6/Il27ra/C1rl	10
GO:0038061	NIK/NF-kappaB signaling	10/490	85/11002	0.00437346	0.00437346	0.0271517	Nfkb2/Tlr2/Birc3/Relb/Cd14/Tlr1/Nod2/Edn1/Nlrp3/Malt1	10
GO:0019319	hexose biosynthetic process	7/490	47/11002	0.00445896	0.00445896	0.0275541	Sik1/Ptpn2/Ranbp2/Sesn2/Hif1a/Crtc2/Foxo1	7
GO:0045123	cellular extravasation	7/490	47/11002	0.00445896	0.00445896	0.0275541	Ptger4/Ccl2/Vcam1/Ccl5/Ptafr/Jaml/Il27ra	7
GO:0001906	cell killing	11/490	99/11002	0.00446393	0.00446393	0.0275541	Ccl2/Nectin2/Il12b/Rnf19b/Ulbp1/Clec2d/Il18rap/Stx11/Hspa8/Nos2/Pik3r6	11
GO:0002702	positive regulation of production of molecular mediator of immune response	9/490	72/11002	0.00449012	0.00449012	0.02761	Tlr2/Cd244a/Cd40/Nod2/Nr4a3/Nlrp3/Malt1/Prkcz/Tnfrsf4	9
GO:0062207	regulation of pattern recognition receptor signaling pathway	9/490	72/11002	0.00449012	0.00449012	0.02761	Acod1/Tlr2/Trim30a/Tnfaip3/Tlr1/Nod2/Zc3hav1/Mfhas1/Irak3	9
GO:0042535	positive regulation of tumor necrosis factor biosynthetic process	4/490	16/11002	0.00461181	0.00461181	0.0280395	Tlr2/Mapkapk2/Tlr1/Jak2	4
GO:0045063	T-helper 1 cell differentiation	4/490	16/11002	0.00461181	0.00461181	0.0280395	Relb/Sema4a/Hlx/Il27	4
GO:0050820	positive regulation of coagulation	4/490	16/11002	0.00461181	0.00461181	0.0280395	Nfe2l2/Plek/Ptprj/Enpp4	4
GO:0071577	zinc ion transmembrane transport	4/490	16/11002	0.00461181	0.00461181	0.0280395	Slc39a14/Slc39a1/Slc30a4/Trpm2	4
GO:0001666	response to hypoxia	14/490	143/11002	0.00461218	0.00461218	0.0280395	Slc11a2/Plk3/Nfe2l2/Hif1a/Rest/Hmox1/Adam17/Smad4/Eif4ebp1/Edn1/Nos2/Vasn/Cd38/Suv39h2	14
GO:0007623	circadian rhythm	14/490	143/11002	0.00461218	0.00461218	0.0280395	Ptger4/Noct/Piwil2/Nfil3/Sik1/Relb/Bhlhe40/Nampt/Ahr/Impdh2/Nos2/Pspc1/Id3/Suv39h2	14
GO:0042326	negative regulation of phosphorylation	26/490	338/11002	0.00469258	0.00469258	0.028453	Prr5l/Cdkn1a/Birc3/Hgf/Rnf149/Samsn1/Trib3/Tnfaip3/Parp14/Hipk3/Mvp/Ptpn2/Ppm1f/Dab2/Hexim1/Tnip1/Socs1/Dnaja1/Smad4/Ptprj/C9orf72/Foxo1/Irak3/Nup62/Prkcz/Nupr1	26
GO:0001933	negative regulation of protein phosphorylation	24/490	304/11002	0.00469787	0.00469787	0.028453	Prr5l/Cdkn1a/Hgf/Rnf149/Samsn1/Trib3/Tnfaip3/Parp14/Hipk3/Mvp/Ptpn2/Ppm1f/Dab2/Hexim1/Tnip1/Socs1/Dnaja1/Smad4/Ptprj/C9orf72/Foxo1/Irak3/Nup62/Prkcz	24
GO:0006879	cellular iron ion homeostasis	6/490	36/11002	0.00472048	0.00472048	0.0285364	Fth1/Slc11a2/Hif1a/Lcn2/Hmox1/Smad4	6
GO:0045926	negative regulation of growth	16/490	174/11002	0.00473952	0.00473952	0.0285523	Cdkn1a/Sema4a/Dab2/Ifrd1/Sesn2/Actr3/Acvr1b/Hif1a/Sh3bp4/Smad4/Bcl6/Ptprj/Pnpt1/Ntn1/Sav1/Zc3h12d	16
GO:0045766	positive regulation of angiogenesis	12/490	114/11002	0.00474084	0.00474084	0.0285523	Hgf/Itga5/Ccl5/Nfe2l2/Cd40/Hif1a/Hmox1/Cdh5/C3ar1/Pik3r6/Ecm1/Plk2	12
GO:0055076	transition metal ion homeostasis	10/490	86/11002	0.00475768	0.00475768	0.0286003	Slc39a14/Fth1/Slc11a2/Slc31a1/Hif1a/Sod2/Lcn2/Hmox1/Slc30a4/Smad4	10
GO:0014812	muscle cell migration	9/490	73/11002	0.0049253	0.0049253	0.0293886	Ptger4/P2ry2/Ccl5/Nfe2l2/Iqgap1/Src/Pdgfa/Nr4a3/Plxna1	9
GO:0031341	regulation of cell killing	9/490	73/11002	0.0049253	0.0049253	0.0293886	Ccl2/Nectin2/Il12b/Ulbp1/Clec2d/Il18rap/Hspa8/Nos2/Pik3r6	9
GO:0038127	ERBB signaling pathway	9/490	73/11002	0.0049253	0.0049253	0.0293886	Rhbdf2/Mvp/Ptpn2/Iqgap1/Src/Adam17/Ptprj/Bcar1/Nup62	9
GO:1902882	regulation of response to oxidative stress	9/490	73/11002	0.0049253	0.0049253	0.0293886	Hgf/Nfe2l2/Sesn2/Slc7a11/Hif1a/Sod2/Rest/Nr4a3/Trpm2	9
GO:0008015	blood circulation	20/490	239/11002	0.00502227	0.00502227	0.0297074	Pde4b/P2ry2/Ccl4/Nampt/Ahr/Hif1a/Sod2/Hmox1/Cdh5/Atp1a1/C3ar1/Sumo1/Adora2b/Sri/Ptprj/Edn1/Nos2/Ptafr/Jak2/Cd38	20
GO:0034330	cell junction organization	31/490	427/11002	0.00502328	0.00502328	0.0297074	Tlr2/Sdc4/Lrrc4/Itga5/Nrp2/Sema4a/Tns1/Ppm1f/Mmp14/Actr3/Slc7a11/Fcgr2b/Chmp4b/Rab8b/Synpo/Chd4/Rest/Iqgap1/Src/Cdh5/Pip5k1a/Hspa8/Plec/Ptprj/Rhoc/Fscn1/Ntn1/Unc13a/Grhl1/Dst/Nectin1	31
GO:0032722	positive regulation of chemokine production	7/490	48/11002	0.00502482	0.00502482	0.0297074	Tlr2/P2ry2/Ccl5/Nod2/Adam17/Adora2b/Mcoln2	7
GO:0045576	mast cell activation	7/490	48/11002	0.00502482	0.00502482	0.0297074	Nectin2/Lcp2/Hmox1/Plscr1/Adora2b/Nr4a3/Rac2	7
GO:0046637	regulation of alpha-beta T cell differentiation	7/490	48/11002	0.00502482	0.00502482	0.0297074	Hlx/Socs1/Bcl6/Nlrp3/Malt1/Il27/Prkcz	7
GO:0044283	small molecule biosynthetic process	29/490	392/11002	0.0050573	0.0050573	0.0298446	Fabp5/Ptger4/Cd244a/Sik1/Trib3/Ptpn2/Ranbp2/Dab2/Plek/Sesn2/Ptges/Gatm/Hif1a/Asns/Rest/Nfkb1/Impdh2/Crtc2/Elovl6/Edn1/Foxo1/Prkab2/Eif6/Itpkc/Ptafr/Nme2/Stard4/Fads2/Ip6k3	29
GO:0050679	positive regulation of epithelial cell proliferation	12/490	115/11002	0.00508614	0.00508614	0.0299599	Ccl2/Ccl5/Tnfaip3/Hpn/Hmox1/Nod2/Adam17/Adora2b/Nr4a3/Nme2/Jaml/Ecm1	12
GO:0002708	positive regulation of lymphocyte mediated immunity	10/490	87/11002	0.00516794	0.00516794	0.0302041	Nectin2/Il12b/Ulbp1/Cd40/Nod2/Il18rap/Hspa8/Nlrp3/Malt1/Prkcz	10
GO:0001755	neural crest cell migration	5/490	26/11002	0.00519322	0.00519322	0.0302041	Nrp2/Sema4a/Hif1a/Anxa6/Lama5	5
GO:0010664	negative regulation of striated muscle cell apoptotic process	5/490	26/11002	0.00519322	0.00519322	0.0302041	Nfe2l2/Hspa8/Trip10/Jak2/Nupr1	5
GO:0019730	antimicrobial humoral response	5/490	26/11002	0.00519322	0.00519322	0.0302041	Cxcl10/Acod1/Ccl2/Cxcl11/Nod2	5
GO:0032735	positive regulation of interleukin-12 production	5/490	26/11002	0.00519322	0.00519322	0.0302041	Tlr2/Il12b/Tnfsf9/Cd40/Nod2	5
GO:0061082	myeloid leukocyte cytokine production	5/490	26/11002	0.00519322	0.00519322	0.0302041	Tlr2/Hmox1/Bcl6/Nr4a3/Irak3	5
GO:0140353	lipid export from cell	5/490	26/11002	0.00519322	0.00519322	0.0302041	Spp1/P2ry2/Dab2/Edn1/Nos2	5
GO:1901617	organic hydroxy compound biosynthetic process	13/490	130/11002	0.00520733	0.00520733	0.0302317	Cd244a/Ch25h/Dab2/Plek/Slc7a11/Rest/Nfkb1/Itpkc/Ptafr/Sqle/Stard4/Ip6k3/Hdc	13
GO:0051091	positive regulation of DNA-binding transcription factor activity	16/490	176/11002	0.00529113	0.00529113	0.0306629	Tlr2/Ifrd1/Traf1/Cd40/Fcgr2b/Lrrfip1/Nod2/Il18rap/Crtc2/Edn1/Nlrp3/Sav1/Malt1/Jak2/Irak3/Prkcz	16
GO:1902903	regulation of supramolecular fiber organization	21/490	257/11002	0.00538245	0.00538245	0.0311361	Ptger4/Tlr2/Ldlr/Sdc4/Sh3pxd2b/Arap1/Ppm1f/Plek/Pde4dip/Actr3/Vasp/Synpo/Smad4/Cdh5/Braf/Hspa8/Arpc1b/Rhoc/C9orf72/Edn1/Fhod1	21
GO:0033674	positive regulation of kinase activity	26/490	342/11002	0.00546584	0.00546584	0.0315054	Cdkn1a/Sdc4/Csf1/Il1rn/Hgf/Il12b/Pik3r5/Adam9/Ranbp2/Dab2/Tlr1/Cd40/Socs1/Iqgap1/Nod2/Src/Adam17/Daxx/Irgm2/Pdgfa/Fpr2/Edn1/Pik3r6/Malt1/Jak2/Prkcz	26
GO:0071363	cellular response to growth factor stimulus	26/490	342/11002	0.00546584	0.00546584	0.0315054	Ehd1/Ccl2/Hgf/Apaf1/Nrp2/Mapkapk2/Adam9/Dab2/Hivep1/Ncl/Actr3/Acvr1b/Hspa5/Hif1a/Iqgap1/Src/Adam17/Smad4/Nfkb1/Bambi/Cdh5/Zeb1/Bcar1/Ing2/Vasn/Creb3l1	26
GO:0032956	regulation of actin cytoskeleton organization	20/490	241/11002	0.005505	0.005505	0.0316363	Ptger4/Tlr2/Sdc4/Sh3pxd2b/Hck/Arap1/Ppm1f/Plek/Actr3/Vasp/Synpo/Smad4/Braf/Arpc1b/Rhoc/C9orf72/Edn1/Fscn1/Trpm2/Fhod1	20
GO:0071407	cellular response to organic cyclic compound	23/490	291/11002	0.00550819	0.00550819	0.0316363	Ccl12/Acod1/Spp1/Pde4b/Ccl5/Ifih1/Dab2/Ahr/Socs1/Rest/Src/Diaph1/Zc3hav1/Dnaja1/Nfkb1/Daxx/Atp1a1/Eif4ebp1/Nr4a3/Nos2/Jak2/Trpm2/Id3	23
GO:0051048	negative regulation of secretion	14/490	146/11002	0.00554297	0.00554297	0.0317794	Ptger4/Rhbdf2/Il1rn/Tnfaip3/Tlr8/Anpep/Rest/Hmox1/Braf/Edn1/Nlrp3/Rab11fip1/Il27ra/Tnfrsf4	14
GO:0007259	receptor signaling pathway via JAK-STAT	10/490	88/11002	0.00560542	0.00560542	0.0320348	Ptger4/Il12b/Ccl5/Stat2/Parp14/Ptpn2/Cd40/Il15ra/Socs1/Jak2	10
GO:0046635	positive regulation of alpha-beta T cell activation	7/490	49/11002	0.00564301	0.00564301	0.0320348	Cd244a/Il12b/Hlx/Socs1/Nlrp3/Malt1/Prkcz	7
GO:0090398	cellular senescence	7/490	49/11002	0.00564301	0.00564301	0.0320348	Cdkn1a/Nampt/Cdk6/Bcl6/Pnpt1/Ing2/Plk2	7
GO:0098659	inorganic cation import across plasma membrane	7/490	49/11002	0.00564301	0.00564301	0.0320348	Slc39a14/Slc11a2/Slc31a1/Slc12a4/Atp1a1/Kcnj9/Trpm2	7
GO:0099587	inorganic ion import across plasma membrane	7/490	49/11002	0.00564301	0.00564301	0.0320348	Slc39a14/Slc11a2/Slc31a1/Slc12a4/Atp1a1/Kcnj9/Trpm2	7
GO:1901342	regulation of vasculature development	18/490	209/11002	0.00564717	0.00564717	0.0320348	Cxcl10/Ptger4/Ccl2/Hgf/Itga5/Ccl5/Sema4a/Nfe2l2/Cd40/Hif1a/Sod2/Hmox1/Cdh5/C3ar1/Pik3r6/Ecm1/Plk2/Creb3l1	18
GO:0032868	response to insulin	15/490	162/11002	0.00576581	0.00576581	0.0326503	Gm9847/Trib3/Ptpn2/Vgf/Sesn2/Eprs/Rab8b/Socs1/Src/Zfp106/Eif4ebp1/Foxo1/Eif6/Bcar1/Prkcz	15
GO:0001780	neutrophil homeostasis	4/490	17/11002	0.00582152	0.00582152	0.0327644	Hcar2/Pde4b/Slc7a11/Fcgr2b	4
GO:0009595	detection of biotic stimulus	4/490	17/11002	0.00582152	0.00582152	0.0327644	Tlr2/Trex1/Tlr1/Nod2	4
GO:0042104	positive regulation of activated T cell proliferation	4/490	17/11002	0.00582152	0.00582152	0.0327644	Il12b/Tnfsf9/Cd86/Icosl	4
GO:0022408	negative regulation of cell-cell adhesion	12/490	117/11002	0.00583679	0.00583679	0.0327644	Sdc4/Il1rn/Cd274/Tnfaip3/Hlx/Ptpn2/Ppm1f/Socs1/Cd86/Bcl6/Jak2/Zc3h12d	12
GO:0051017	actin filament bundle assembly	12/490	117/11002	0.00583679	0.00583679	0.0327644	Ptger4/Sdc4/Sh3pxd2b/Arap1/Ppm1f/Plek/Synpo/Src/Braf/Rhoc/Fscn1/Fhod1	12
GO:0036473	cell death in response to oxidative stress	9/490	75/11002	0.00589334	0.00589334	0.0330243	Hgf/Nfe2l2/Slc7a11/Hif1a/Sod2/Rest/Nr4a3/Jak2/Trpm2	9
GO:0090257	regulation of muscle system process	13/490	132/11002	0.00591869	0.00591869	0.0331087	Ptger4/Pde4b/Smad4/Anxa6/Atp1a1/Sumo1/Adora2b/Sri/Nr4a3/Trip10/Edn1/Foxo1/Ptafr	13
GO:0090277	positive regulation of peptide hormone secretion	8/490	62/11002	0.00595903	0.00595903	0.0332766	Ptger4/Nadk/Rab8b/Hif1a/Sri/Jak2/Cd38/Trpm2	8
GO:0048732	gland development	20/490	243/11002	0.00602528	0.00602528	0.0335884	Csf1/Hgf/Tnfaip3/Hlx/Ahr/Hif1a/Sod2/Hpn/Hmox1/Igf2r/Src/Smad4/Man2a1/Braf/Pdgfa/Ntn1/Jak2/Tet2/Lama5/Plxna1	20
GO:0001773	myeloid dendritic cell activation	5/490	27/11002	0.00614468	0.00614468	0.0339009	Cd244a/Batf/Relb/Tnfsf9/Clec4d	5
GO:0036475	neuron death in response to oxidative stress	5/490	27/11002	0.00614468	0.00614468	0.0339009	Slc7a11/Hif1a/Rest/Nr4a3/Trpm2	5
GO:0097028	dendritic cell differentiation	5/490	27/11002	0.00614468	0.00614468	0.0339009	Batf/Relb/Tnfsf9/Zbtb46/Trpm2	5
GO:1903203	regulation of oxidative stress-induced neuron death	5/490	27/11002	0.00614468	0.00614468	0.0339009	Slc7a11/Hif1a/Rest/Nr4a3/Trpm2	5
GO:0001961	positive regulation of cytokine-mediated signaling pathway	6/490	38/11002	0.00620759	0.00620759	0.0339009	Csf1/Parp14/Irgm1/Adam17/Ikbke/Irgm2	6
GO:0006023	aminoglycan biosynthetic process	6/490	38/11002	0.00620759	0.00620759	0.0339009	Ptger4/B3gnt7/B4galt5/Nfkb1/Slc35d1/Ext1	6
GO:0050710	negative regulation of cytokine secretion	6/490	38/11002	0.00620759	0.00620759	0.0339009	Ptger4/Tnfaip3/Tlr8/Nlrp3/Il27ra/Tnfrsf4	6
GO:0060761	negative regulation of response to cytokine stimulus	6/490	38/11002	0.00620759	0.00620759	0.0339009	Il1rn/Trex1/Parp14/Ptpn2/Irak3/Ecm1	6
GO:0090342	regulation of cell aging	6/490	38/11002	0.00620759	0.00620759	0.0339009	Nampt/Cdk6/Bcl6/Pnpt1/Ing2/Plk2	6
GO:1904705	regulation of vascular smooth muscle cell proliferation	6/490	38/11002	0.00620759	0.00620759	0.0339009	Cdkn1a/Sod2/Hmox1/Nr4a3/Edn1/Jak2	6
GO:1990874	vascular smooth muscle cell proliferation	6/490	38/11002	0.00620759	0.00620759	0.0339009	Cdkn1a/Sod2/Hmox1/Nr4a3/Edn1/Jak2	6
GO:2000243	positive regulation of reproductive process	6/490	38/11002	0.00620759	0.00620759	0.0339009	Ptger4/Piwil2/P2ry2/Acvr1b/Src/Ptafr	6
GO:0061572	actin filament bundle organization	12/490	118/11002	0.0062437	0.0062437	0.0340404	Ptger4/Sdc4/Sh3pxd2b/Arap1/Ppm1f/Plek/Synpo/Src/Braf/Rhoc/Fscn1/Fhod1	12
GO:0002381	immunoglobulin production involved in immunoglobulin mediated immune response	7/490	50/11002	0.0063164	0.0063164	0.0343206	Batf/Trex1/Cd40/Nod2/Icosl/Bcl6/Il27ra	7
GO:0032648	regulation of interferon-beta production	7/490	50/11002	0.0063164	0.0063164	0.0343206	Tlr2/Relb/Ifih1/Tlr8/Zc3hav1/Traf3/Ifnar1	7
GO:0071236	cellular response to antibiotic	11/490	104/11002	0.00647855	0.00647855	0.0351424	Hgf/Tnfaip3/Nfe2l2/Ahr/Lcn2/Src/Daxx/Nr4a3/Ccl7/Trpm2/Id3	11
GO:0019932	second-messenger-mediated signaling	18/490	212/11002	0.00653036	0.00653036	0.0353639	Cxcl10/Ptger4/Ccrl2/Pde4b/Vcam1/Ccl4/Ahr/Irgm2/Adora2b/Sri/Ptprj/Fpr2/Edn1/Ccr1/Nos2/Nme2/Trpm2/Ppp3cc	18
GO:0007162	negative regulation of cell adhesion	16/490	180/11002	0.00655105	0.00655105	0.0353861	Sdc4/Il1rn/Cd274/Tnfaip3/Hlx/Ptpn2/Ppm1f/Mmp14/Socs1/Src/Cd86/Bcl6/Bcar1/Jak2/Zc3h12d/Plxna1	16
GO:0001910	regulation of leukocyte mediated cytotoxicity	8/490	63/11002	0.00656741	0.00656741	0.0353861	Ccl2/Nectin2/Il12b/Ulbp1/Clec2d/Il18rap/Hspa8/Pik3r6	8
GO:1902106	negative regulation of leukocyte differentiation	8/490	63/11002	0.00656741	0.00656741	0.0353861	Hlx/Ptpn2/Cdk6/Clec2d/Zbtb46/Socs1/Bcl6/Nme2	8
GO:1903531	negative regulation of secretion by cell	13/490	134/11002	0.00670554	0.00670554	0.03607	Ptger4/Rhbdf2/Il1rn/Tnfaip3/Tlr8/Rest/Hmox1/Braf/Edn1/Nlrp3/Rab11fip1/Il27ra/Tnfrsf4	13
GO:0042035	regulation of cytokine biosynthetic process	9/490	77/11002	0.00700188	0.00700188	0.0372673	Tlr2/Mapkapk2/Tlr8/Tlr1/Nfkb1/Icosl/Ptafr/Jak2/Il27	9
GO:0050764	regulation of phagocytosis	9/490	77/11002	0.00700188	0.00700188	0.0372673	Tlr2/Ccl2/Hck/Fcgr2b/Il15ra/Nod2/Hspa8/Ptprj/Fpr2	9
GO:0098739	import across plasma membrane	9/490	77/11002	0.00700188	0.00700188	0.0372673	Slc39a14/Slc7a1/Slc11a2/Slc31a1/Slc7a11/Slc12a4/Atp1a1/Kcnj9/Trpm2	9
GO:0030888	regulation of B cell proliferation	7/490	51/11002	0.00704786	0.00704786	0.0372673	Cdkn1a/Ahr/Cd40/Fcgr2b/Bcl6/Cd38/Tnfrsf4	7
GO:0032608	interferon-beta production	7/490	51/11002	0.00704786	0.00704786	0.0372673	Tlr2/Relb/Ifih1/Tlr8/Zc3hav1/Traf3/Ifnar1	7
GO:0034605	cellular response to heat	7/490	51/11002	0.00704786	0.00704786	0.0372673	Hspa5/Hmox1/Daxx/Eif2s1/Hspa8/Sumo1/Tfec	7
GO:0046364	monosaccharide biosynthetic process	7/490	51/11002	0.00704786	0.00704786	0.0372673	Sik1/Ptpn2/Ranbp2/Sesn2/Hif1a/Crtc2/Foxo1	7
GO:1901655	cellular response to ketone	7/490	51/11002	0.00704786	0.00704786	0.0372673	Acod1/Ptger4/Spp1/Ahr/Src/Eif4ebp1/Jak2	7
GO:0002720	positive regulation of cytokine production involved in immune response	6/490	39/11002	0.00706691	0.00706691	0.0372673	Tlr2/Nod2/Nr4a3/Nlrp3/Malt1/Prkcz	6
GO:0010665	regulation of cardiac muscle cell apoptotic process	6/490	39/11002	0.00706691	0.00706691	0.0372673	Nfe2l2/Smad4/Hspa8/Trip10/Jak2/Nupr1	6
GO:0043536	positive regulation of blood vessel endothelial cell migration	6/490	39/11002	0.00706691	0.00706691	0.0372673	Nfe2l2/Cd40/Hif1a/Hmox1/Adam17/Plk2	6
GO:2000107	negative regulation of leukocyte apoptotic process	6/490	39/11002	0.00706691	0.00706691	0.0372673	Ccl5/Bcl2a1a/Fcgr2b/Hif1a/Nod2/Tnfrsf4	6
GO:0002377	immunoglobulin production	10/490	91/11002	0.00709313	0.00709313	0.0372835	Batf/Trex1/Tnfaip3/Cd40/Fcgr2b/Nod2/Icosl/Bcl6/Il27ra/Tnfrsf4	10
GO:0097696	receptor signaling pathway via STAT	10/490	91/11002	0.00709313	0.00709313	0.0372835	Ptger4/Il12b/Ccl5/Stat2/Parp14/Ptpn2/Cd40/Il15ra/Socs1/Jak2	10
GO:0030308	negative regulation of cell growth	13/490	135/11002	0.00712895	0.00712895	0.0374108	Cdkn1a/Sema4a/Dab2/Ifrd1/Sesn2/Actr3/Acvr1b/Sh3bp4/Smad4/Bcl6/Ptprj/Ntn1/Zc3h12d	13
GO:1902622	regulation of neutrophil migration	5/490	28/11002	0.00721225	0.00721225	0.0374296	Ptger4/Nod2/C3ar1/Edn1/Rac2	5
GO:0010595	positive regulation of endothelial cell migration	8/490	64/11002	0.00722167	0.00722167	0.0374296	Nfe2l2/Cd40/Hif1a/Hmox1/Adam17/Adora2b/Bcar1/Plk2	8
GO:0032642	regulation of chemokine production	8/490	64/11002	0.00722167	0.00722167	0.0374296	Tlr2/P2ry2/Ccl5/Mefv/Nod2/Adam17/Adora2b/Mcoln2	8
GO:0042102	positive regulation of T cell proliferation	8/490	64/11002	0.00722167	0.00722167	0.0374296	Cd244a/Vcam1/Il12b/Cd274/Ccl5/Tnfsf9/Cd86/Icosl	8
GO:0045995	regulation of embryonic development	8/490	64/11002	0.00722167	0.00722167	0.0374296	Noct/B4galt5/Il1rn/Tnfaip3/Nfe2l2/Hspa5/Phldb1/Lama5	8
GO:0007435	salivary gland morphogenesis	4/490	18/11002	0.00722546	0.00722546	0.0374296	Hgf/Pdgfa/Lama5/Plxna1	4
GO:0009593	detection of chemical stimulus	4/490	18/11002	0.00722546	0.00722546	0.0374296	Tlr2/Tlr1/Sod2/Nod2	4
GO:0090344	negative regulation of cell aging	4/490	18/11002	0.00722546	0.00722546	0.0374296	Nampt/Cdk6/Bcl6/Plk2	4
GO:0033002	muscle cell proliferation	14/490	151/11002	0.00742512	0.00742512	0.0384021	Cdkn1a/Il12b/Ccl5/Tnfaip3/Nampt/Hif1a/Sod2/Hmox1/C3ar1/Nr4a3/Edn1/Ptafr/Sav1/Jak2	14
GO:0045860	positive regulation of protein kinase activity	24/490	316/11002	0.0075265	0.0075265	0.0388641	Cdkn1a/Sdc4/Csf1/Il1rn/Hgf/Il12b/Pik3r5/Adam9/Dab2/Tlr1/Cd40/Socs1/Iqgap1/Nod2/Src/Adam17/Daxx/Irgm2/Pdgfa/Edn1/Pik3r6/Malt1/Jak2/Prkcz	24
GO:0001558	regulation of cell growth	23/490	300/11002	0.00787987	0.00787987	0.0406236	Cxcl16/Cdkn1a/Csf2rb/Sema4a/Dab2/Ifrd1/Sesn2/Mmp14/Actr3/Olfm1/Acvr1b/Hpn/Sh3bp4/Adam17/Smad4/Bcl6/Ptprj/Trip10/Edn1/Ntn1/Cd38/Unc13a/Zc3h12d	23
GO:0032602	chemokine production	8/490	65/11002	0.00792391	0.00792391	0.0407854	Tlr2/P2ry2/Ccl5/Mefv/Nod2/Adam17/Adora2b/Mcoln2	8
GO:0001649	osteoblast differentiation	11/490	107/11002	0.00799232	0.00799232	0.0410065	Ptger4/Noct/Spp1/Sh3pxd2b/Cdk6/Pdlim7/Ahr/Rest/Smad4/Id3/Creb3l1	11
GO:0071241	cellular response to inorganic substance	11/490	107/11002	0.00799232	0.00799232	0.0410065	Clic4/Trex1/Hvcn1/Hmox1/Iqgap1/Daxx/Braf/Sumo1/Foxo1/Bcar1/Trpm2	11
GO:0001763	morphogenesis of a branching structure	12/490	122/11002	0.00810075	0.00810075	0.0414968	Csf1/Hgf/Clic4/Spint1/Mmp14/Ahr/Src/Smad4/Pdgfa/Edn1/Lama5/Plxna1	12
GO:0070848	response to growth factor	26/490	353/11002	0.00815673	0.00815673	0.0417172	Ehd1/Ccl2/Hgf/Apaf1/Nrp2/Mapkapk2/Adam9/Dab2/Hivep1/Ncl/Actr3/Acvr1b/Hspa5/Hif1a/Iqgap1/Src/Adam17/Smad4/Nfkb1/Bambi/Cdh5/Zeb1/Bcar1/Ing2/Vasn/Creb3l1	26
GO:0051260	protein homooligomerization	20/490	250/11002	0.00817319	0.00817319	0.0417351	Ehd1/Gbp5/Apaf1/Vasp/Chmp4b/Sod2/Rest/Usp16/Lcn2/Hmox1/Src/Smad4/Optn/Impdh2/Anxa6/Ikbke/Crtc2/Rhoc/Pnpt1/Trpm2	20
GO:0002830	positive regulation of type 2 immune response	3/490	10/11002	0.00833386	0.00833386	0.0421548	Nod2/Nlrp3/Prkcz	3
GO:0032693	negative regulation of interleukin-10 production	3/490	10/11002	0.00833386	0.00833386	0.0421548	Il12b/Cd274/Fcgr2b	3
GO:0036005	response to macrophage colony-stimulating factor	3/490	10/11002	0.00833386	0.00833386	0.0421548	Tlr2/Csf1/Ptpn2	3
GO:0036006	cellular response to macrophage colony-stimulating factor stimulus	3/490	10/11002	0.00833386	0.00833386	0.0421548	Tlr2/Csf1/Ptpn2	3
GO:0048012	hepatocyte growth factor receptor signaling pathway	3/490	10/11002	0.00833386	0.00833386	0.0421548	Hgf/Ptpn2/Bcar1	3
GO:0071850	mitotic cell cycle arrest	3/490	10/11002	0.00833386	0.00833386	0.0421548	Cdkn1a/Cdc14a/Pnpt1	3
GO:0002369	T cell cytokine production	5/490	29/11002	0.00840271	0.00840271	0.0423038	Il12b/Il18rap/Nlrp3/Malt1/Prkcz	5
GO:0048662	negative regulation of smooth muscle cell proliferation	5/490	29/11002	0.00840271	0.00840271	0.0423038	Cdkn1a/Il12b/Tnfaip3/Sod2/Hmox1	5
GO:1902116	negative regulation of organelle assembly	5/490	29/11002	0.00840271	0.00840271	0.0423038	Chmp4b/Smad4/Map4/Tbc1d30/Nupr1	5
GO:0003018	vascular process in circulatory system	11/490	108/11002	0.00855368	0.00855368	0.0429967	P2ry2/Ccl4/Ahr/Hif1a/Sod2/Cdh5/Adora2b/Ptprj/Edn1/Ptafr/Cd38	11
GO:0034620	cellular response to unfolded protein	8/490	66/11002	0.00867622	0.00867622	0.0432426	Herpud1/Ptpn2/Nfe2l2/Hspa5/Optn/Daxx/Hspa8/Creb3l1	8
GO:0050871	positive regulation of B cell activation	8/490	66/11002	0.00867622	0.00867622	0.0432426	Cdkn1a/Tnip2/Mmp14/Cd40/Nod2/Bcl6/Cd38/Tnfrsf4	8
GO:1900407	regulation of cellular response to oxidative stress	8/490	66/11002	0.00867622	0.00867622	0.0432426	Hgf/Nfe2l2/Slc7a11/Hif1a/Sod2/Rest/Nr4a3/Trpm2	8
GO:0031343	positive regulation of cell killing	7/490	53/11002	0.00869656	0.00869656	0.0432426	Ccl2/Nectin2/Il12b/Ulbp1/Il18rap/Hspa8/Nos2	7
GO:0050766	positive regulation of phagocytosis	7/490	53/11002	0.00869656	0.00869656	0.0432426	Ccl2/Fcgr2b/Il15ra/Nod2/Hspa8/Ptprj/Fpr2	7
GO:0055072	iron ion homeostasis	7/490	53/11002	0.00869656	0.00869656	0.0432426	Fth1/Slc11a2/Hif1a/Sod2/Lcn2/Hmox1/Smad4	7
GO:0097327	response to antineoplastic agent	7/490	53/11002	0.00869656	0.00869656	0.0432426	Trex1/Slc31a1/Cdk6/Hmox1/Daxx/Eif4ebp1/Jak2	7
GO:0030072	peptide hormone secretion	14/490	154/11002	0.00877829	0.00877829	0.0433985	Ptger4/Il1rn/Ccl5/Vgf/Nadk/Rab8b/Hif1a/Rest/Sri/Edn1/Nos2/Jak2/Cd38/Trpm2	14
GO:0002717	positive regulation of natural killer cell mediated immunity	4/490	19/11002	0.00883565	0.00883565	0.0433985	Nectin2/Il12b/Ulbp1/Il18rap	4
GO:0002920	regulation of humoral immune response	4/490	19/11002	0.00883565	0.00883565	0.0433985	Acod1/Fcgr2b/Nod2/Spns2	4
GO:0022617	extracellular matrix disassembly	4/490	19/11002	0.00883565	0.00883565	0.0433985	Sh3pxd2b/Mmp13/Hpn/Fscn1	4
GO:0031954	positive regulation of protein autophosphorylation	4/490	19/11002	0.00883565	0.00883565	0.0433985	Rap2c/Iqgap1/Src/Pdgfa	4
GO:0045954	positive regulation of natural killer cell mediated cytotoxicity	4/490	19/11002	0.00883565	0.00883565	0.0433985	Nectin2/Il12b/Ulbp1/Il18rap	4
GO:0090022	regulation of neutrophil chemotaxis	4/490	19/11002	0.00883565	0.00883565	0.0433985	Nod2/C3ar1/Edn1/Rac2	4
GO:1903204	negative regulation of oxidative stress-induced neuron death	4/490	19/11002	0.00883565	0.00883565	0.0433985	Slc7a11/Hif1a/Rest/Nr4a3	4
GO:0002712	regulation of B cell mediated immunity	6/490	41/11002	0.00903832	0.00903832	0.0440581	Nectin2/Cd40/Fcgr2b/Nod2/Bcl6/Il27ra	6
GO:0002889	regulation of immunoglobulin mediated immune response	6/490	41/11002	0.00903832	0.00903832	0.0440581	Nectin2/Cd40/Fcgr2b/Nod2/Bcl6/Il27ra	6
GO:0003333	amino acid transmembrane transport	6/490	41/11002	0.00903832	0.00903832	0.0440581	Slc7a1/Lrrc8c/Slc38a2/Slc7a11/Slc7a5/Slc7a7	6
GO:0010761	fibroblast migration	6/490	41/11002	0.00903832	0.00903832	0.0440581	Prr5l/Sdc4/Tns1/Actr3/Pip5k1a/Braf	6
GO:0014032	neural crest cell development	6/490	41/11002	0.00903832	0.00903832	0.0440581	Nrp2/Sema4a/Hif1a/Anxa6/Edn1/Lama5	6
GO:2000377	regulation of reactive oxygen species metabolic process	14/490	155/11002	0.00927026	0.00927026	0.0451205	Acod1/Ptger4/Tlr2/Cdkn1a/Birc3/Trim30a/Nfe2l2/Ulbp1/Hif1a/Sod2/Fpr2/Foxo1/Eif6/Jak2	14
GO:0097191	extrinsic apoptotic signaling pathway	15/490	171/11002	0.00935735	0.00935735	0.0454757	Hgf/Tnfaip3/Bcl2a1d/Bcl2a1b/Dab2/Bcl2a1a/Traf1/Pea15a/Acvr1b/Lcn2/Hmox1/Src/Jak2/Bcl2a1c/Tnfrsf4	15
GO:0052547	regulation of peptidase activity	18/490	220/11002	0.0094449	0.0094449	0.045832	Birc3/Hgf/Apaf1/Herpud1/Slc11a2/Tank/Spint1/Bcl2a1d/Ppm1f/Mefv/Serpina3f/Rest/Src/Nlrp3/Malt1/Jak2/Ecm1/Serpina3g	18
GO:0007173	epidermal growth factor receptor signaling pathway	8/490	67/11002	0.0094807	0.0094807	0.0458676	Rhbdf2/Ptpn2/Iqgap1/Src/Adam17/Ptprj/Bcar1/Nup62	8
GO:0045582	positive regulation of T cell differentiation	8/490	67/11002	0.0094807	0.0094807	0.0458676	Tnfsf9/Hlx/Socs1/Bcl6/Nlrp3/Pik3r6/Malt1/Prkcz	8
GO:0002637	regulation of immunoglobulin production	7/490	54/11002	0.00961955	0.00961955	0.0464	Trex1/Tnfaip3/Cd40/Fcgr2b/Bcl6/Il27ra/Tnfrsf4	7
GO:0010717	regulation of epithelial to mesenchymal transition	7/490	54/11002	0.00961955	0.00961955	0.0464	Dab2/Glipr2/Hpn/Smad4/Bambi/Phldb1/Vasn	7
GO:0002762	negative regulation of myeloid leukocyte differentiation	5/490	30/11002	0.00972261	0.00972261	0.0467571	Ptpn2/Cdk6/Clec2d/Zbtb46/Nme2	5
GO:0050798	activated T cell proliferation	5/490	30/11002	0.00972261	0.00972261	0.0467571	Il12b/Cd274/Tnfsf9/Cd86/Icosl	5
GO:0048511	rhythmic process	16/490	188/11002	0.00979458	0.00979458	0.0470331	Nfkb2/Ptger4/Noct/Piwil2/Nfil3/Sik1/Relb/Bhlhe40/Nampt/Ahr/Src/Impdh2/Nos2/Pspc1/Id3/Suv39h2	16
GO:0010662	regulation of striated muscle cell apoptotic process	6/490	42/11002	0.0101587	0.0101587	0.0487091	Nfe2l2/Smad4/Hspa8/Trip10/Jak2/Nupr1	6
GO:1903707	negative regulation of hemopoiesis	10/490	96/11002	0.0102309	0.0102309	0.0489824	Hlx/Ptpn2/Nfe2l2/Cdk6/Clec2d/Paf1/Zbtb46/Socs1/Bcl6/Nme2	10
GO:1905954	positive regulation of lipid localization	7/490	55/11002	0.0106121	0.0106121	0.0503779	Ehd1/Spp1/P2ry2/Msr1/Dab2/Ikbke/Edn1	7
GO:0002701	negative regulation of production of molecular mediator of immune response	4/490	20/11002	0.0106631	0.0106631	0.0503779	Fcgr2b/Hmox1/Bcl6/Irak3	4
GO:0002825	regulation of T-helper 1 type immune response	4/490	20/11002	0.0106631	0.0106631	0.0503779	Il12b/Hlx/Il27/Il27ra	4
GO:0006953	acute-phase response	4/490	20/11002	0.0106631	0.0106631	0.0503779	Il1rn/Ccl5/Saa3/Plscr1	4
GO:0007431	salivary gland development	4/490	20/11002	0.0106631	0.0106631	0.0503779	Hgf/Pdgfa/Lama5/Plxna1	4
GO:0032692	negative regulation of interleukin-1 production	4/490	20/11002	0.0106631	0.0106631	0.0503779	Ptger4/Tnfaip3/Mefv/Nlrp3	4
GO:0051894	positive regulation of focal adhesion assembly	4/490	20/11002	0.0106631	0.0106631	0.0503779	Sdc4/Ppm1f/Iqgap1/Ptprj	4
GO:0071800	podosome assembly	4/490	20/11002	0.0106631	0.0106631	0.0503779	Sh3pxd2b/Hck/Src/Fscn1	4
GO:0086004	regulation of cardiac muscle cell contraction	4/490	20/11002	0.0106631	0.0106631	0.0503779	Pde4b/Atp1a1/Sumo1/Sri	4
GO:0010035	response to inorganic substance	22/490	291/11002	0.0107726	0.0107726	0.0508206	Hgf/Clic4/Slc11a2/Trex1/Adam9/Tnfaip3/Nfe2l2/Hvcn1/Gatm/Sod2/Lcn2/Hmox1/Iqgap1/Src/Slc30a4/Daxx/Braf/Sumo1/Nr4a3/Foxo1/Bcar1/Trpm2	22
GO:0051495	positive regulation of cytoskeleton organization	14/490	158/11002	0.0108775	0.0108775	0.0512403	Sdc4/Sh3pxd2b/Hck/Ppm1f/Plek/Pde4dip/Actr3/Vasp/Synpo/Braf/Arpc1b/Rhoc/Edn1/Nup62	14
GO:0042542	response to hydrogen peroxide	10/490	97/11002	0.0109685	0.0109685	0.051242	Hgf/Adam9/Tnfaip3/Nfe2l2/Sod2/Lcn2/Hmox1/Src/Nr4a3/Trpm2	10
GO:0035813	regulation of renal sodium excretion	3/490	11/11002	0.0110846	0.0110846	0.051242	Ptger4/Anpep/Edn1	3
GO:0043922	negative regulation by host of viral transcription	3/490	11/11002	0.0110846	0.0110846	0.051242	Ccl4/Ccl5/Rest	3
GO:0043970	histone H3-K9 acetylation	3/490	11/11002	0.0110846	0.0110846	0.051242	Piwil2/Smad4/Crtc2	3
GO:0045655	regulation of monocyte differentiation	3/490	11/11002	0.0110846	0.0110846	0.051242	Csf1/Cdk6/Zbtb46	3
GO:0045722	positive regulation of gluconeogenesis	3/490	11/11002	0.0110846	0.0110846	0.051242	Ptpn2/Hif1a/Foxo1	3
GO:0070423	nucleotide-binding oligomerization domain containing signaling pathway	3/490	11/11002	0.0110846	0.0110846	0.051242	Tnfaip3/Nod2/Irgm2	3
GO:0070431	nucleotide-binding oligomerization domain containing 2 signaling pathway	3/490	11/11002	0.0110846	0.0110846	0.051242	Tnfaip3/Nod2/Irgm2	3
GO:0072683	T cell extravasation	3/490	11/11002	0.0110846	0.0110846	0.051242	Ccl2/Ccl5/Il27ra	3
GO:0090030	regulation of steroid hormone biosynthetic process	3/490	11/11002	0.0110846	0.0110846	0.051242	Dab2/Rest/Atp1a1	3
GO:0098792	xenophagy	3/490	11/11002	0.0110846	0.0110846	0.051242	Tlr2/Nod2/Optn	3
GO:0140131	positive regulation of lymphocyte chemotaxis	3/490	11/11002	0.0110846	0.0110846	0.051242	Ccl4/Ccl5/Adam17	3
GO:1905939	regulation of gonad development	3/490	11/11002	0.0110846	0.0110846	0.051242	Ptger4/Src/Nupr1	3
GO:0098656	anion transmembrane transport	11/490	112/11002	0.0111103	0.0111103	0.0512871	Slc7a1/Lrrc8c/Slc38a2/Slc7a11/Lrrc8b/Slc12a4/Slc7a5/Slc20a2/Slc7a7/Ptafr/Slc25a10	11
GO:0032814	regulation of natural killer cell activation	5/490	31/11002	0.0111782	0.0111782	0.0515271	Cd244a/Il12b/Slamf7/Ulbp1/Il15ra	5
GO:0002832	negative regulation of response to biotic stimulus	8/490	69/11002	0.0112545	0.0112545	0.0517307	Acod1/Trex1/Tnfaip3/Parp14/Ptpn2/Clec2d/Ccr1/Irak3	8
GO:0045639	positive regulation of myeloid cell differentiation	8/490	69/11002	0.0112545	0.0112545	0.0517307	Csf1/Il12b/Ccl5/Ccl3/Acvr1b/Hif1a/Cd101/Ccr1	8
GO:0001837	epithelial to mesenchymal transition	9/490	83/11002	0.0112967	0.0112967	0.0517795	Dab2/Glipr2/Hif1a/Hpn/Smad4/Bambi/Trip10/Phldb1/Vasn	9
GO:0045765	regulation of angiogenesis	16/490	191/11002	0.0112973	0.0112973	0.0517795	Cxcl10/Ccl2/Hgf/Itga5/Ccl5/Sema4a/Nfe2l2/Cd40/Hif1a/Hmox1/Cdh5/C3ar1/Pik3r6/Ecm1/Plk2/Creb3l1	16
GO:0014031	mesenchymal cell development	6/490	43/11002	0.0113744	0.0113744	0.052059	Nrp2/Sema4a/Hif1a/Anxa6/Edn1/Lama5	6
GO:0071375	cellular response to peptide hormone stimulus	15/490	175/11002	0.0114368	0.0114368	0.0522703	Gm9847/Trib3/Ptpn2/Eprs/Rab8b/Socs1/Src/Nfkb1/Zfp106/Eif4ebp1/Nr4a3/Foxo1/Bcar1/Jak2/Prkcz	15
GO:0006820	anion transport	22/490	293/11002	0.0116055	0.0116055	0.0529662	Ldlr/Il1rn/P2ry2/Slc7a1/Clic4/Nfkbie/Lrrc8c/Slc38a2/Slc7a11/Eprs/Lrrc8b/Plscr1/Slc12a4/Slc7a5/Atp11a/Slc20a2/Edn1/Slc7a7/Nos2/Ptafr/Slc25a10/Slc4a3	22
GO:0098660	inorganic ion transmembrane transport	25/490	347/11002	0.0121655	0.0121655	0.0553102	Cxcl10/Slc39a14/Gpr35/Pde4b/Slc11a2/Slc39a1/Slc31a1/Hvcn1/Ahr/Kcnh4/Hpn/Diaph1/Panx1/Slc30a4/Atp6v0a1/Slc12a4/Atp1a1/Sumo1/Sri/Slc20a2/Kcnj9/Ptafr/Trpm2/Mcoln2/Slc25a10	25
GO:0048661	positive regulation of smooth muscle cell proliferation	9/490	84/11002	0.0121706	0.0121706	0.0553102	Ccl5/Nampt/Hif1a/Hmox1/C3ar1/Nr4a3/Edn1/Ptafr/Jak2	9
GO:0098742	cell-cell adhesion via plasma-membrane adhesion molecules	9/490	84/11002	0.0121706	0.0121706	0.0553102	Lrrc4/Il1rn/Nectin2/Vcam1/Itga5/Tnfaip3/Cdh5/Jaml/Nectin1	9
GO:0006959	humoral immune response	8/490	70/11002	0.012228	0.012228	0.0554929	Cxcl10/Acod1/Ccl2/Cxcl11/Fcgr2b/Nod2/Spns2/C1rl	8
GO:0050678	regulation of epithelial cell proliferation	17/490	210/11002	0.0126444	0.0126444	0.0567004	Ccl12/Ccl2/Ccl5/Tnfaip3/Dab2/Cdk6/Hpn/Hmox1/Nod2/Adam17/Adora2b/Nr4a3/Sav1/Nme2/Jaml/Ecm1/Nupr1	17
GO:0051493	regulation of cytoskeleton organization	28/490	402/11002	0.0126713	0.0126713	0.0567004	Ptger4/Tlr2/Sdc4/Sh3pxd2b/Hck/Arap1/Ppm1f/Plek/Pde4dip/Actr3/Vasp/Chmp4b/Synpo/Diaph1/Smad4/Cdh5/Braf/Arpc1b/Rhoc/C9orf72/Edn1/Phldb1/Fscn1/Nup62/Trpm2/Fhod1/Dst/Plk2	28
GO:0031663	lipopolysaccharide-mediated signaling pathway	6/490	44/11002	0.0126893	0.0126893	0.0567004	Ccl12/Acod1/Cd14/Ccl5/Tnfaip3/Malt1	6
GO:0050810	regulation of steroid biosynthetic process	6/490	44/11002	0.0126893	0.0126893	0.0567004	Dab2/Rest/Nfkb1/Atp1a1/Adora2b/Stard4	6
GO:0051893	regulation of focal adhesion assembly	6/490	44/11002	0.0126893	0.0126893	0.0567004	Sdc4/Ppm1f/Mmp14/Iqgap1/Src/Ptprj	6
GO:0090109	regulation of cell-substrate junction assembly	6/490	44/11002	0.0126893	0.0126893	0.0567004	Sdc4/Ppm1f/Mmp14/Iqgap1/Src/Ptprj	6
GO:0150116	regulation of cell-substrate junction organization	6/490	44/11002	0.0126893	0.0126893	0.0567004	Sdc4/Ppm1f/Mmp14/Iqgap1/Src/Ptprj	6
GO:0036037	CD8-positive, alpha-beta T cell activation	4/490	21/11002	0.012718	0.012718	0.0567004	Cd244a/Cd274/Gpr18/Socs1	4
GO:0042533	tumor necrosis factor biosynthetic process	4/490	21/11002	0.012718	0.012718	0.0567004	Tlr2/Mapkapk2/Tlr1/Jak2	4
GO:0042534	regulation of tumor necrosis factor biosynthetic process	4/490	21/11002	0.012718	0.012718	0.0567004	Tlr2/Mapkapk2/Tlr1/Jak2	4
GO:0061844	antimicrobial humoral immune response mediated by antimicrobial peptide	4/490	21/11002	0.012718	0.012718	0.0567004	Cxcl10/Ccl2/Cxcl11/Nod2	4
GO:0150117	positive regulation of cell-substrate junction organization	4/490	21/11002	0.012718	0.012718	0.0567004	Sdc4/Ppm1f/Iqgap1/Ptprj	4
GO:0006826	iron ion transport	5/490	32/11002	0.0127756	0.0127756	0.0567004	Slc39a14/Fth1/Slc11a2/Lcn2/Nectin1	5
GO:0032728	positive regulation of interferon-beta production	5/490	32/11002	0.0127756	0.0127756	0.0567004	Tlr2/Ifih1/Tlr8/Zc3hav1/Ifnar1	5
GO:0060337	type I interferon signaling pathway	5/490	32/11002	0.0127756	0.0127756	0.0567004	Trex1/Stat2/Ptpn2/Ikbke/Ifnar1	5
GO:0071357	cellular response to type I interferon	5/490	32/11002	0.0127756	0.0127756	0.0567004	Trex1/Stat2/Ptpn2/Ikbke/Ifnar1	5
GO:0030177	positive regulation of Wnt signaling pathway	9/490	85/11002	0.0130939	0.0130939	0.058033	Tlr2/Tnfaip3/Dab2/Atp6v0c/Src/Nfkb1/Bambi/Ctdnep1/Csnk1g3	9
GO:0060562	epithelial tube morphogenesis	17/490	211/11002	0.013207	0.013207	0.0584536	Cxcl10/Sdc4/Csf1/Apaf1/Clic4/Spint1/Mmp14/Vasp/Ahr/Hif1a/Src/Smad4/Arl13b/Luzp1/Edn1/Ntn1/Lama5	17
GO:0046425	regulation of receptor signaling pathway via JAK-STAT	8/490	71/11002	0.013262	0.013262	0.0586166	Ptger4/Il12b/Ccl5/Parp14/Ptpn2/Cd40/Socs1/Jak2	8
GO:0031667	response to nutrient levels	18/490	228/11002	0.0133199	0.0133199	0.058792	Ldlr/Cdkn1a/Spp1/Sik1/Nfe2l2/Vgf/Sesn2/Gatm/Hspa5/Asns/Sod2/Panx1/Eif2s1/Plec/Eif4ebp1/Foxo1/Cpeb4/Wdr59	18
GO:0001659	temperature homeostasis	11/490	115/11002	0.0133833	0.0133833	0.0589105	Fabp5/Il1rn/Ccl5/Zfp516/Gatm/Lcn2/Adam17/Elovl6/Prkab2/Jak2/Trpm2	11
GO:0034614	cellular response to reactive oxygen species	11/490	115/11002	0.0133833	0.0133833	0.0589105	Hgf/Trex1/Tnfaip3/Nfe2l2/Sod2/Lcn2/Src/Nr4a3/Foxo1/Bcar1/Trpm2	11
GO:0044262	cellular carbohydrate metabolic process	16/490	195/11002	0.0135771	0.0135771	0.059682	B3gnt7/Cd244a/B4galt5/Sik1/Ptpn2/Ranbp2/Plek/Sesn2/Stk40/Hif1a/Src/Braf/Foxo1/Ptafr/Ext1/Nupr1	16
GO:0043122	regulation of I-kappaB kinase/NF-kappaB signaling	12/490	131/11002	0.01385	0.01385	0.0607988	Tnip2/Il1rn/Tnip3/Tank/Tnfaip3/Alpk1/Tnip1/Sqstm1/Nod2/Zc3hav1/Optn/Nup62	12
GO:0002526	acute inflammatory response	7/490	58/11002	0.0140351	0.0140351	0.0613426	Il1rn/Ccl5/Saa3/Fcgr2b/Plscr1/Nlrp3/Nupr1	7
GO:0048041	focal adhesion assembly	7/490	58/11002	0.0140351	0.0140351	0.0613426	Sdc4/Ppm1f/Mmp14/Iqgap1/Src/Pip5k1a/Ptprj	7
GO:0010632	regulation of epithelial cell migration	13/490	147/11002	0.0140446	0.0140446	0.0613426	Adam9/Sema4a/Nfe2l2/Ppm1f/Glipr2/Cd40/Hif1a/Hmox1/Src/Adam17/Adora2b/Bcar1/Plk2	13
GO:0002711	positive regulation of T cell mediated immunity	6/490	45/11002	0.0141072	0.0141072	0.0613426	Nectin2/Il12b/Hspa8/Nlrp3/Malt1/Prkcz	6
GO:0002763	positive regulation of myeloid leukocyte differentiation	6/490	45/11002	0.0141072	0.0141072	0.0613426	Csf1/Il12b/Ccl5/Ccl3/Cd101/Ccr1	6
GO:0048864	stem cell development	6/490	45/11002	0.0141072	0.0141072	0.0613426	Nrp2/Sema4a/Hif1a/Anxa6/Edn1/Lama5	6
GO:0050732	negative regulation of peptidyl-tyrosine phosphorylation	6/490	45/11002	0.0141072	0.0141072	0.0613426	Samsn1/Parp14/Mvp/Ptpn2/Socs1/Prkcz	6
GO:0002719	negative regulation of cytokine production involved in immune response	3/490	12/11002	0.0142976	0.0142976	0.0613588	Hmox1/Bcl6/Irak3	3
GO:0010878	cholesterol storage	3/490	12/11002	0.0142976	0.0142976	0.0613588	Ehd1/Msr1/Stard4	3
GO:0010894	negative regulation of steroid biosynthetic process	3/490	12/11002	0.0142976	0.0142976	0.0613588	Rest/Nfkb1/Atp1a1	3
GO:0019359	nicotinamide nucleotide biosynthetic process	3/490	12/11002	0.0142976	0.0142976	0.0613588	Nampt/Nadk/Naprt	3
GO:0032700	negative regulation of interleukin-17 production	3/490	12/11002	0.0142976	0.0142976	0.0613588	Tlr2/Il12b/Il27ra	3
GO:0035872	nucleotide-binding domain, leucine rich repeat containing receptor signaling pathway	3/490	12/11002	0.0142976	0.0142976	0.0613588	Tnfaip3/Nod2/Irgm2	3
GO:0042532	negative regulation of tyrosine phosphorylation of STAT protein	3/490	12/11002	0.0142976	0.0142976	0.0613588	Parp14/Ptpn2/Socs1	3
GO:0045793	positive regulation of cell size	3/490	12/11002	0.0142976	0.0142976	0.0613588	Ahr/Edn1/Tmem123	3
GO:0045939	negative regulation of steroid metabolic process	3/490	12/11002	0.0142976	0.0142976	0.0613588	Rest/Nfkb1/Atp1a1	3
GO:0002244	hematopoietic progenitor cell differentiation	10/490	101/11002	0.0143282	0.0143282	0.0613588	Batf/Trex1/Rrs1/Nfe2l2/Cdk6/Apobec3/Rest/Braf/Tet2/Heatr9	10
GO:0051147	regulation of muscle cell differentiation	10/490	101/11002	0.0143282	0.0143282	0.0613588	Cxcl10/Ehd1/Sik1/Mmp14/Sod2/Smad4/Daxx/Trip10/Edn1/Zeb1	10
GO:0008645	hexose transmembrane transport	8/490	72/11002	0.0143585	0.0143585	0.0613588	Fabp5/Trib3/Nfe2l2/Sesn2/Pea15a/Braf/Nr4a3/Edn1	8
GO:1904659	glucose transmembrane transport	8/490	72/11002	0.0143585	0.0143585	0.0613588	Fabp5/Trib3/Nfe2l2/Sesn2/Pea15a/Braf/Nr4a3/Edn1	8
GO:0002820	negative regulation of adaptive immune response	5/490	33/11002	0.0145205	0.0145205	0.0617239	Samsn1/Fcgr2b/Nod2/Bcl6/Il27ra	5
GO:0007492	endoderm development	5/490	33/11002	0.0145205	0.0145205	0.0617239	Itga5/Dab2/Paf1/Smad4/Ext1	5
GO:0042446	hormone biosynthetic process	5/490	33/11002	0.0145205	0.0145205	0.0617239	Dab2/Hif1a/Rest/Nfkb1/Atp1a1	5
GO:0043331	response to dsRNA	5/490	33/11002	0.0145205	0.0145205	0.0617239	Ifih1/Nod2/Zc3hav1/Nfkb1/Irak3	5
GO:0048545	response to steroid hormone	12/490	132/11002	0.0146432	0.0146432	0.0621632	Acod1/Spp1/Il1rn/Adam9/Dab2/Rest/Src/Dnaja1/Daxx/Atp1a1/Eif4ebp1/Jak2	12
GO:0010574	regulation of vascular endothelial growth factor production	4/490	22/11002	0.0150092	0.0150092	0.0631347	Ccl2/Hif1a/C3ar1/Adora2b	4
GO:0036003	positive regulation of transcription from RNA polymerase II promoter in response to stress	4/490	22/11002	0.0150092	0.0150092	0.0631347	Nfe2l2/Sesn2/Hif1a/Creb3l1	4
GO:0042119	neutrophil activation	4/490	22/11002	0.0150092	0.0150092	0.0631347	Ccl5/Il18rap/Stx11/Ptafr	4
GO:0050919	negative chemotaxis	4/490	22/11002	0.0150092	0.0150092	0.0631347	Nrp2/Sema4a/Pdgfa/Ntn1	4
GO:1902624	positive regulation of neutrophil migration	4/490	22/11002	0.0150092	0.0150092	0.0631347	Ptger4/C3ar1/Edn1/Rac2	4
GO:1902745	positive regulation of lamellipodium organization	4/490	22/11002	0.0150092	0.0150092	0.0631347	Actr3/Src/Fscn1/Rac2	4
GO:1903115	regulation of actin filament-based movement	4/490	22/11002	0.0150092	0.0150092	0.0631347	Pde4b/Atp1a1/Sumo1/Sri	4
GO:0043087	regulation of GTPase activity	18/490	231/11002	0.0150604	0.0150604	0.0632675	Ccl12/Ccl2/Ccl22/Ccl4/Ccl9/Ccl5/Arap1/Ccl3/Cd40/Iqgap1/Sh3bp4/Tbc1d1/Pip5k1a/Bcl6/Ric1/Ccl7/Tbc1d30/Plxna1	18
GO:0008217	regulation of blood pressure	9/490	87/11002	0.0150953	0.0150953	0.0633314	Nampt/Ahr/Sod2/Hmox1/Atp1a1/C3ar1/Edn1/Nos2/Ptafr	9
GO:0045833	negative regulation of lipid metabolic process	7/490	59/11002	0.0153337	0.0153337	0.0642481	Hcar2/Sik1/Trib3/Rest/Nfkb1/Atp1a1/Pdgfa	7
GO:0015749	monosaccharide transmembrane transport	8/490	73/11002	0.0155195	0.0155195	0.0649421	Fabp5/Trib3/Nfe2l2/Sesn2/Pea15a/Braf/Nr4a3/Edn1	8
GO:0001912	positive regulation of leukocyte mediated cytotoxicity	6/490	46/11002	0.0156319	0.0156319	0.065243	Ccl2/Nectin2/Il12b/Ulbp1/Il18rap/Hspa8	6
GO:0014911	positive regulation of smooth muscle cell migration	6/490	46/11002	0.0156319	0.0156319	0.065243	Ptger4/P2ry2/Ccl5/Iqgap1/Src/Nr4a3	6
GO:0016236	macroautophagy	15/490	182/11002	0.0159303	0.0159303	0.0664024	Tlr2/Irgm1/Sesn2/Chmp4b/Hif1a/Sqstm1/Hmox1/Nod2/Optn/Atp6v0a1/Irgm2/Atg16l2/C9orf72/Ubxn2a/Nupr1	15
GO:0072330	monocarboxylic acid biosynthetic process	11/490	118/11002	0.0159925	0.0159925	0.0665754	Fabp5/Trib3/Ptges/Gatm/Asns/Elovl6/Edn1/Prkab2/Eif6/Stard4/Fads2	11
GO:1903034	regulation of response to wounding	10/490	103/11002	0.0162714	0.0162714	0.0676477	Ptger4/Cdkn1a/Ccl2/Nfe2l2/Plek/Adam17/Braf/Pdgfa/Ptprj/Enpp4	10
GO:0044089	positive regulation of cellular component biogenesis	26/490	374/11002	0.016292	0.016292	0.0676477	Sdc4/Gbp5/Sh3pxd2b/Sema4a/Arap1/Ppm1f/G3bp1/Plek/Pde4dip/Actr3/Vasp/Ahr/Synpo/Iqgap1/Src/Cdh5/Braf/Sumo1/Arpc1b/Ptprj/Rhoc/Edn1/Phldb1/Fscn1/Rac2/Nup62	26
GO:0001782	B cell homeostasis	5/490	34/11002	0.0164183	0.0164183	0.0677356	Tnfaip3/Bcl2a1a/Ahr/Hif1a/Spns2	5
GO:0010830	regulation of myotube differentiation	5/490	34/11002	0.0164183	0.0164183	0.0677356	Cxcl10/Ehd1/Sik1/Mmp14/Daxx	5
GO:0030890	positive regulation of B cell proliferation	5/490	34/11002	0.0164183	0.0164183	0.0677356	Cdkn1a/Cd40/Bcl6/Cd38/Tnfrsf4	5
GO:0032715	negative regulation of interleukin-6 production	5/490	34/11002	0.0164183	0.0164183	0.0677356	Hgf/Trim30a/Tnfaip3/Irak3/Il27ra	5
GO:2000404	regulation of T cell migration	5/490	34/11002	0.0164183	0.0164183	0.0677356	Cxcl10/Ccl5/Adam17/Ecm1/Il27ra	5
GO:0110053	regulation of actin filament organization	15/490	183/11002	0.0166699	0.0166699	0.0686857	Ptger4/Tlr2/Sdc4/Sh3pxd2b/Arap1/Ppm1f/Plek/Actr3/Vasp/Synpo/Braf/Arpc1b/Rhoc/C9orf72/Fhod1	15
GO:0019218	regulation of steroid metabolic process	7/490	60/11002	0.0167155	0.0167155	0.0686978	Ldlr/Dab2/Rest/Nfkb1/Atp1a1/Adora2b/Stard4	7
GO:0042100	B cell proliferation	7/490	60/11002	0.0167155	0.0167155	0.0686978	Cdkn1a/Ahr/Cd40/Fcgr2b/Bcl6/Cd38/Tnfrsf4	7
GO:0034219	carbohydrate transmembrane transport	8/490	74/11002	0.016747	0.016747	0.0687396	Fabp5/Trib3/Nfe2l2/Sesn2/Pea15a/Braf/Nr4a3/Edn1	8
GO:0050878	regulation of body fluid levels	14/490	167/11002	0.0170288	0.0170288	0.0698073	Ptger4/P2ry2/Nfe2l2/Plek/Mmp13/Slc7a11/Mllt6/Hif1a/Pdgfa/Ptprj/Edn1/Enpp4/Grhl1/Itga2b	14
GO:0051851	modulation by host of symbiont process	6/490	47/11002	0.0172669	0.0172669	0.070647	Ccl4/Ccl5/Hpn/Rest/Igf2r/Hspa8	6
GO:0051092	positive regulation of NF-kappaB transcription factor activity	10/490	104/11002	0.0173132	0.0173132	0.070647	Tlr2/Traf1/Cd40/Lrrfip1/Nod2/Il18rap/Nlrp3/Malt1/Irak3/Prkcz	10
GO:1905952	regulation of lipid localization	9/490	89/11002	0.0173132	0.0173132	0.070647	Ehd1/Spp1/P2ry2/Msr1/Ptpn2/Dab2/Eprs/Ikbke/Edn1	9
GO:0005975	carbohydrate metabolic process	26/490	376/11002	0.0173213	0.0173213	0.070647	Fabp5/Ptger4/B3gnt7/Cd244a/B4galt5/Sik1/Trex1/Ptpn2/Ranbp2/Plek/Sesn2/Stk40/Hif1a/Src/Nfkb1/Man2a1/Braf/Crtc2/Foxo1/Eif6/Ptafr/St3gal4/Ext1/Ggta1/Eno2/Nupr1	26
GO:0006829	zinc ion transport	4/490	23/11002	0.0175447	0.0175447	0.0709298	Slc39a14/Slc39a1/Slc30a4/Trpm2	4
GO:0010573	vascular endothelial growth factor production	4/490	23/11002	0.0175447	0.0175447	0.0709298	Ccl2/Hif1a/C3ar1/Adora2b	4
GO:0010907	positive regulation of glucose metabolic process	4/490	23/11002	0.0175447	0.0175447	0.0709298	Ptpn2/Hif1a/Src/Foxo1	4
GO:0032660	regulation of interleukin-17 production	4/490	23/11002	0.0175447	0.0175447	0.0709298	Tlr2/Il12b/Nod2/Il27ra	4
GO:0050869	negative regulation of B cell activation	4/490	23/11002	0.0175447	0.0175447	0.0709298	Samsn1/Tnfaip3/Fcgr2b/Bcl6	4
GO:0072538	T-helper 17 type immune response	4/490	23/11002	0.0175447	0.0175447	0.0709298	Batf/Nlrp3/Malt1/Il27ra	4
GO:1902042	negative regulation of extrinsic apoptotic signaling pathway via death domain receptors	4/490	23/11002	0.0175447	0.0175447	0.0709298	Hgf/Tnfaip3/Pea15a/Hmox1	4
GO:1901215	negative regulation of neuron death	14/490	168/11002	0.0178492	0.0178492	0.0709844	Ccl12/Csf1/Ccl5/Slc7a11/Chmp4b/Hif1a/Sod2/Rest/Hmox1/Optn/Braf/Nr4a3/Cpeb4/Jak2	14
GO:0090276	regulation of peptide hormone secretion	11/490	120/11002	0.0179324	0.0179324	0.0709844	Ptger4/Ccl5/Nadk/Rab8b/Hif1a/Rest/Sri/Nos2/Jak2/Cd38/Trpm2	11
GO:0000054	ribosomal subunit export from nucleus	3/490	13/11002	0.0179824	0.0179824	0.0709844	Rrs1/Sdad1/Eif6	3
GO:0002374	cytokine secretion involved in immune response	3/490	13/11002	0.0179824	0.0179824	0.0709844	Tlr2/Nod2/Nlrp3	3
GO:0002643	regulation of tolerance induction	3/490	13/11002	0.0179824	0.0179824	0.0709844	Cd274/Cd86/Irak3	3
GO:0009072	aromatic amino acid family metabolic process	3/490	13/11002	0.0179824	0.0179824	0.0709844	Il4i1/Afmid/Hdc	3
GO:0015732	prostaglandin transport	3/490	13/11002	0.0179824	0.0179824	0.0709844	P2ry2/Edn1/Nos2	3
GO:0019363	pyridine nucleotide biosynthetic process	3/490	13/11002	0.0179824	0.0179824	0.0709844	Nampt/Nadk/Naprt	3
GO:0032310	prostaglandin secretion	3/490	13/11002	0.0179824	0.0179824	0.0709844	P2ry2/Edn1/Nos2	3
GO:0032753	positive regulation of interleukin-4 production	3/490	13/11002	0.0179824	0.0179824	0.0709844	Icosl/Nlrp3/Prkcz	3
GO:0033750	ribosome localization	3/490	13/11002	0.0179824	0.0179824	0.0709844	Rrs1/Sdad1/Eif6	3
GO:0035584	calcium-mediated signaling using intracellular calcium source	3/490	13/11002	0.0179824	0.0179824	0.0709844	Vcam1/Ptprj/Trpm2	3
GO:0035791	platelet-derived growth factor receptor-beta signaling pathway	3/490	13/11002	0.0179824	0.0179824	0.0709844	Ptpn2/Src/Pdgfa	3
GO:0035809	regulation of urine volume	3/490	13/11002	0.0179824	0.0179824	0.0709844	Ptger4/Mllt6/Edn1	3
GO:0042754	negative regulation of circadian rhythm	3/490	13/11002	0.0179824	0.0179824	0.0709844	Ptger4/Piwil2/Suv39h2	3
GO:0044062	regulation of excretion	3/490	13/11002	0.0179824	0.0179824	0.0709844	Ptger4/Anpep/Edn1	3
GO:1900225	regulation of NLRP3 inflammasome complex assembly	3/490	13/11002	0.0179824	0.0179824	0.0709844	Gbp5/Trim30a/Mefv	3
GO:1902176	negative regulation of oxidative stress-induced intrinsic apoptotic signaling pathway	3/490	13/11002	0.0179824	0.0179824	0.0709844	Nfe2l2/Hif1a/Sod2	3
GO:0017015	regulation of transforming growth factor beta receptor signaling pathway	8/490	75/11002	0.0180429	0.0180429	0.0709844	Dab2/Hspa5/Adam17/Smad4/Bambi/Zeb1/Ing2/Vasn	8
GO:0051153	regulation of striated muscle cell differentiation	8/490	75/11002	0.0180429	0.0180429	0.0709844	Cxcl10/Ehd1/Sik1/Mmp14/Smad4/Daxx/Trip10/Edn1	8
GO:0061041	regulation of wound healing	8/490	75/11002	0.0180429	0.0180429	0.0709844	Ptger4/Cdkn1a/Ccl2/Nfe2l2/Plek/Pdgfa/Ptprj/Enpp4	8
GO:1904892	regulation of receptor signaling pathway via STAT	8/490	75/11002	0.0180429	0.0180429	0.0709844	Ptger4/Il12b/Ccl5/Parp14/Ptpn2/Cd40/Socs1/Jak2	8
GO:0002275	myeloid cell activation involved in immune response	7/490	61/11002	0.018183	0.018183	0.0712745	Trex1/Hmox1/Stx11/Adora2b/Nr4a3/Rac2/Ptafr	7
GO:0010827	regulation of glucose transmembrane transport	7/490	61/11002	0.018183	0.018183	0.0712745	Fabp5/Trib3/Nfe2l2/Pea15a/Braf/Nr4a3/Edn1	7
GO:0120162	positive regulation of cold-induced thermogenesis	7/490	61/11002	0.018183	0.018183	0.0712745	Fabp5/Zfp516/Gatm/Lcn2/Elovl6/Prkab2/Jak2	7
GO:0001541	ovarian follicle development	5/490	35/11002	0.018474	0.018474	0.0722393	Ptger4/Vgf/Ahr/Src/Smad4	5
GO:0046638	positive regulation of alpha-beta T cell differentiation	5/490	35/11002	0.018474	0.018474	0.0722393	Hlx/Socs1/Nlrp3/Malt1/Prkcz	5
GO:0050709	negative regulation of protein secretion	9/490	90/11002	0.0185072	0.0185072	0.0722816	Ptger4/Rhbdf2/Tnfaip3/Tlr8/Rest/Nlrp3/Rab11fip1/Il27ra/Tnfrsf4	9
GO:0032481	positive regulation of type I interferon production	6/490	48/11002	0.0190158	0.0190158	0.0741127	Tlr2/Cd14/Ifih1/Tlr8/Zc3hav1/Ifnar1	6
GO:0043406	positive regulation of MAP kinase activity	13/490	153/11002	0.0190221	0.0190221	0.0741127	Il1rn/Hgf/Pik3r5/Adam9/Dab2/Cd40/Iqgap1/Nod2/Src/Pdgfa/Edn1/Pik3r6/Jak2	13
GO:0032870	cellular response to hormone stimulus	23/490	325/11002	0.0190756	0.0190756	0.0742314	Acod1/Ptger4/Spp1/Gm9847/Trib3/Ptpn2/Dab2/Eprs/Rab8b/Socs1/Rest/Src/Dnaja1/Nfkb1/Daxx/Atp1a1/Zfp106/Eif4ebp1/Nr4a3/Foxo1/Bcar1/Jak2/Prkcz	23
GO:0050868	negative regulation of T cell activation	8/490	76/11002	0.0194093	0.0194093	0.0753478	Sdc4/Cd274/Hlx/Ptpn2/Socs1/Cd86/Bcl6/Zc3h12d	8
GO:1903844	regulation of cellular response to transforming growth factor beta stimulus	8/490	76/11002	0.0194093	0.0194093	0.0753478	Dab2/Hspa5/Adam17/Smad4/Bambi/Zeb1/Ing2/Vasn	8
GO:0043547	positive regulation of GTPase activity	14/490	170/11002	0.0195799	0.0195799	0.0759189	Ccl12/Ccl2/Ccl22/Ccl4/Ccl9/Ccl5/Arap1/Ccl3/Cd40/Tbc1d1/Pip5k1a/Ric1/Ccl7/Tbc1d30	14
GO:0002709	regulation of T cell mediated immunity	7/490	62/11002	0.0197388	0.0197388	0.0763511	Nectin2/Il12b/Nod2/Hspa8/Nlrp3/Malt1/Prkcz	7
GO:0050000	chromosome localization	7/490	62/11002	0.0197388	0.0197388	0.0763511	Kif2c/Rrs1/Nup98/Actr3/Chmp4b/Nup62/Cenpq	7
GO:0019722	calcium-mediated signaling	11/490	122/11002	0.0200423	0.0200423	0.0771545	Ccrl2/Vcam1/Ccl4/Irgm2/Sri/Ptprj/Fpr2/Edn1/Ccr1/Trpm2/Ppp3cc	11
GO:0030198	extracellular matrix organization	11/490	122/11002	0.0200423	0.0200423	0.0771545	Nfkb2/Sh3pxd2b/Spint1/Mmp19/Mmp14/Mmp13/Hpn/Mpzl3/Phldb1/Fscn1/Creb3l1	11
GO:0043062	extracellular structure organization	11/490	122/11002	0.0200423	0.0200423	0.0771545	Nfkb2/Sh3pxd2b/Spint1/Mmp19/Mmp14/Mmp13/Hpn/Mpzl3/Phldb1/Fscn1/Creb3l1	11
GO:1901888	regulation of cell junction assembly	11/490	122/11002	0.0200423	0.0200423	0.0771545	Tlr2/Sdc4/Sema4a/Ppm1f/Mmp14/Actr3/Iqgap1/Src/Ptprj/Ntn1/Nectin1	11
GO:0002691	regulation of cellular extravasation	4/490	24/11002	0.0203316	0.0203316	0.0775271	Ptger4/Ccl2/Ptafr/Il27ra	4
GO:0007157	heterophilic cell-cell adhesion via plasma membrane cell adhesion molecules	4/490	24/11002	0.0203316	0.0203316	0.0775271	Vcam1/Itga5/Jaml/Nectin1	4
GO:0030511	positive regulation of transforming growth factor beta receptor signaling pathway	4/490	24/11002	0.0203316	0.0203316	0.0775271	Dab2/Adam17/Smad4/Ing2	4
GO:0032816	positive regulation of natural killer cell activation	4/490	24/11002	0.0203316	0.0203316	0.0775271	Cd244a/Il12b/Ulbp1/Il15ra	4
GO:0044848	biological phase	4/490	24/11002	0.0203316	0.0203316	0.0775271	Piwil2/Sycp2/Trex1/Cdk6	4
GO:0070229	negative regulation of lymphocyte apoptotic process	4/490	24/11002	0.0203316	0.0203316	0.0775271	Ccl5/Bcl2a1a/Hif1a/Tnfrsf4	4
GO:1903846	positive regulation of cellular response to transforming growth factor beta stimulus	4/490	24/11002	0.0203316	0.0203316	0.0775271	Dab2/Adam17/Smad4/Ing2	4
GO:1904467	regulation of tumor necrosis factor secretion	4/490	24/11002	0.0203316	0.0203316	0.0775271	Ptger4/Tlr2/Ifih1/Il27ra	4
GO:0031952	regulation of protein autophosphorylation	5/490	36/11002	0.0206923	0.0206923	0.0787164	Mvp/Rap2c/Iqgap1/Src/Pdgfa	5
GO:0042472	inner ear morphogenesis	5/490	36/11002	0.0206923	0.0206923	0.0787164	Hpn/Rest/Nr4a3/Zeb1/Ntn1	5
GO:0042471	ear morphogenesis	6/490	49/11002	0.0208818	0.0208818	0.0790638	Hpn/Rest/Nr4a3/Edn1/Zeb1/Ntn1	6
GO:0045453	bone resorption	6/490	49/11002	0.0208818	0.0208818	0.0790638	Ptger4/Spp1/Snx10/Src/Rac2/Cd38	6
GO:0045670	regulation of osteoclast differentiation	6/490	49/11002	0.0208818	0.0208818	0.0790638	Csf1/Il12b/Ccl5/Clec2d/Ccl3/Ccr1	6
GO:1903725	regulation of phospholipid metabolic process	6/490	49/11002	0.0208818	0.0208818	0.0790638	Ldlr/Pik3r5/Nod2/Src/Pdgfa/Fpr2	6
GO:0006986	response to unfolded protein	9/490	92/11002	0.021073	0.021073	0.0795074	Herpud1/Ptpn2/Nfe2l2/Hspa5/Chac1/Optn/Daxx/Hspa8/Creb3l1	9
GO:0008286	insulin receptor signaling pathway	9/490	92/11002	0.021073	0.021073	0.0795074	Gm9847/Ptpn2/Socs1/Src/Zfp106/Eif4ebp1/Foxo1/Bcar1/Prkcz	9
GO:2000027	regulation of animal organ morphogenesis	9/490	92/11002	0.021073	0.021073	0.0795074	Csf1/Hgf/Tnfaip3/Dab2/Hpn/Smad4/Pdgfa/Edn1/Bcor	9
GO:0070838	divalent metal ion transport	20/490	275/11002	0.0213442	0.0213442	0.0804366	Ccl12/Cxcl10/Slc39a14/Gpr35/Pde4b/Ccl4/Ccl5/Slc11a2/Slc39a1/Ahr/Diaph1/Panx1/Slc30a4/Anxa6/Sumo1/Sri/Slc41a2/Ccr1/Trpm2/Mcoln2	20
GO:0009267	cellular response to starvation	10/490	108/11002	0.0219771	0.0219771	0.0823327	Cdkn1a/Sik1/Nfe2l2/Sesn2/Hspa5/Asns/Eif2s1/Foxo1/Cpeb4/Wdr59	10
GO:0072511	divalent inorganic cation transport	20/490	276/11002	0.0220951	0.0220951	0.0823327	Ccl12/Cxcl10/Slc39a14/Gpr35/Pde4b/Ccl4/Ccl5/Slc11a2/Slc39a1/Ahr/Diaph1/Panx1/Slc30a4/Anxa6/Sumo1/Sri/Slc41a2/Ccr1/Trpm2/Mcoln2	20
GO:0001958	endochondral ossification	3/490	14/11002	0.0221441	0.0221441	0.0823327	Nab1/Mmp14/Mmp13	3
GO:0010869	regulation of receptor biosynthetic process	3/490	14/11002	0.0221441	0.0221441	0.0823327	Hif1a/Edn1/Jak2	3
GO:0010954	positive regulation of protein processing	3/490	14/11002	0.0221441	0.0221441	0.0823327	Mmp14/Hpn/Src	3
GO:0032352	positive regulation of hormone metabolic process	3/490	14/11002	0.0221441	0.0221441	0.0823327	Dab2/Hif1a/Hpn	3
GO:0036075	replacement ossification	3/490	14/11002	0.0221441	0.0221441	0.0823327	Nab1/Mmp14/Mmp13	3
GO:0044068	modulation by symbiont of host cellular process	3/490	14/11002	0.0221441	0.0221441	0.0823327	Irgm1/Tnip1/Irgm2	3
GO:0045351	type I interferon biosynthetic process	3/490	14/11002	0.0221441	0.0221441	0.0823327	Tlr8/Irf9/Ifnar1	3
GO:0071428	rRNA-containing ribonucleoprotein complex export from nucleus	3/490	14/11002	0.0221441	0.0221441	0.0823327	Rrs1/Sdad1/Eif6	3
GO:0098581	detection of external biotic stimulus	3/490	14/11002	0.0221441	0.0221441	0.0823327	Tlr2/Tlr1/Nod2	3
GO:0098655	cation transmembrane transport	25/490	366/11002	0.022154	0.022154	0.0823327	Cxcl10/Slc39a14/Gpr35/Ccl2/Pde4b/Slc7a1/Slc11a2/Slc39a1/Slc31a1/Hvcn1/Ahr/Kcnh4/Hpn/Diaph1/Panx1/Slc30a4/Atp6v0a1/Slc12a4/Slc7a5/Atp1a1/Sumo1/Sri/Kcnj9/Trpm2/Mcoln2	25
GO:0043409	negative regulation of MAPK cascade	11/490	124/11002	0.0223302	0.0223302	0.0828918	Rnf149/Hipk3/Ptpn2/Dab2/Tnip1/Dnaja1/Smad4/Ptprj/Foxo1/Irak3/Nup62	11
GO:0030316	osteoclast differentiation	8/490	78/11002	0.0223604	0.0223604	0.0829085	Csf1/Il12b/Ccl5/Snx10/Clec2d/Ccl3/Src/Ccr1	8
GO:1902115	regulation of organelle assembly	14/490	173/11002	0.0224102	0.0224102	0.0829978	Sdc4/Hck/G3bp1/Chmp4b/Src/Smad4/Map4/C9orf72/Edn1/Fscn1/Nup62/Tbc1d30/Plk2/Nupr1	14
GO:0051235	maintenance of location	16/490	207/11002	0.0226104	0.0226104	0.0836429	Cxcl10/Ehd1/Msr1/Fth1/Ptpn2/Hspa5/Lcn2/Diaph1/Slc30a4/Anxa6/Ikbke/Sri/Nfkbib/Trpm2/Sqle/Stard4	16
GO:0019915	lipid storage	6/490	50/11002	0.022868	0.022868	0.0844989	Ehd1/Msr1/Ptpn2/Ikbke/Sqle/Stard4	6
GO:0034340	response to type I interferon	5/490	37/11002	0.0230775	0.0230775	0.0849809	Trex1/Stat2/Ptpn2/Ikbke/Ifnar1	5
GO:0051496	positive regulation of stress fiber assembly	5/490	37/11002	0.0230775	0.0230775	0.0849809	Sdc4/Sh3pxd2b/Ppm1f/Braf/Rhoc	5
GO:0072604	interleukin-6 secretion	5/490	37/11002	0.0230775	0.0230775	0.0849809	Ifih1/Tlr8/Ncl/Nos2/Il27ra	5
GO:0032088	negative regulation of NF-kappaB transcription factor activity	7/490	64/11002	0.0231246	0.0231246	0.085057	Acod1/Tnfaip3/Nod2/Traf3/Nfkbib/Nlrp3/Irak3	7
GO:0034142	toll-like receptor 4 signaling pathway	4/490	25/11002	0.0233755	0.0233755	0.0855479	Acod1/Cd14/Tnip3/Mfhas1	4
GO:0035272	exocrine system development	4/490	25/11002	0.0233755	0.0233755	0.0855479	Hgf/Pdgfa/Lama5/Plxna1	4
GO:0044003	modulation by symbiont of host process	4/490	25/11002	0.0233755	0.0233755	0.0855479	Tlr2/Irgm1/Tnip1/Irgm2	4
GO:1904037	positive regulation of epithelial cell apoptotic process	4/490	25/11002	0.0233755	0.0233755	0.0855479	Ccl12/Cd40/Eif2s1/Jak2	4
GO:0032869	cellular response to insulin stimulus	12/490	141/11002	0.0234174	0.0234174	0.0855479	Gm9847/Trib3/Ptpn2/Eprs/Rab8b/Socs1/Src/Zfp106/Eif4ebp1/Foxo1/Bcar1/Prkcz	12
GO:1902905	positive regulation of supramolecular fiber organization	12/490	141/11002	0.0234174	0.0234174	0.0855479	Sdc4/Sh3pxd2b/Ppm1f/Plek/Pde4dip/Actr3/Vasp/Synpo/Braf/Arpc1b/Rhoc/Edn1	12
GO:0002792	negative regulation of peptide secretion	9/490	94/11002	0.0238853	0.0238853	0.0870941	Ptger4/Rhbdf2/Tnfaip3/Tlr8/Rest/Nlrp3/Rab11fip1/Il27ra/Tnfrsf4	9
GO:0031214	biomineral tissue development	8/490	79/11002	0.0239488	0.0239488	0.0870941	Spp1/Snx10/Mmp13/Hif1a/Ccr1/Bcor/Ecm1/Nectin1	8
GO:0110148	biomineralization	8/490	79/11002	0.0239488	0.0239488	0.0870941	Spp1/Snx10/Mmp13/Hif1a/Ccr1/Bcor/Ecm1/Nectin1	8
GO:1901222	regulation of NIK/NF-kappaB signaling	8/490	79/11002	0.0239488	0.0239488	0.0870941	Tlr2/Birc3/Cd14/Tlr1/Nod2/Edn1/Nlrp3/Malt1	8
GO:0015849	organic acid transport	13/490	158/11002	0.0240994	0.0240994	0.0874445	Il1rn/P2ry2/Slc7a1/Nfkbie/Lrrc8c/Slc38a2/Slc7a11/Eprs/Slc7a5/Edn1/Slc7a7/Nos2/Slc25a10	13
GO:0046942	carboxylic acid transport	13/490	158/11002	0.0240994	0.0240994	0.0874445	Il1rn/P2ry2/Slc7a1/Nfkbie/Lrrc8c/Slc38a2/Slc7a11/Eprs/Slc7a5/Edn1/Slc7a7/Nos2/Slc25a10	13
GO:0030522	intracellular receptor signaling pathway	12/490	142/11002	0.0245896	0.0245896	0.0891231	Fabp5/Tnfaip3/Ifih1/Dab2/Alpk1/Nod2/Src/Zc3hav1/Dnaja1/Daxx/Irgm2/Jak2	12
GO:0042594	response to starvation	11/490	126/11002	0.0248039	0.0248039	0.0896977	Cdkn1a/Sik1/Nfe2l2/Sesn2/Hspa5/Asns/Eif2s1/Eif4ebp1/Foxo1/Cpeb4/Wdr59	11
GO:0090596	sensory organ morphogenesis	11/490	126/11002	0.0248039	0.0248039	0.0896977	Zhx2/Hif1a/Hpn/Rest/Man2a1/Nr4a3/Edn1/Zeb1/Cabp4/Ntn1/Nectin1	11
GO:0009308	amine metabolic process	6/490	51/11002	0.0249773	0.0249773	0.0899213	Vcam1/Slc7a11/Slc7a7/Odc1/Afmid/Hdc	6
GO:0032024	positive regulation of insulin secretion	6/490	51/11002	0.0249773	0.0249773	0.0899213	Nadk/Hif1a/Sri/Jak2/Cd38/Trpm2	6
GO:0043299	leukocyte degranulation	6/490	51/11002	0.0249773	0.0249773	0.0899213	Hmox1/Stx11/Adora2b/Nr4a3/Rac2/Ptafr	6
GO:0070059	intrinsic apoptotic signaling pathway in response to endoplasmic reticulum stress	6/490	51/11002	0.0249773	0.0249773	0.0899213	Apaf1/Herpud1/Trib3/Ptpn2/Chac1/Creb3l1	6
GO:0010721	negative regulation of cell development	17/490	227/11002	0.0251576	0.0251576	0.0904692	Ldlr/Sema4a/Dab2/Ifrd1/Zhx2/Actr3/Olfm1/Il15ra/Rest/Adam17/Smad4/Katna1/Bcar1/Ntn1/Cd38/Plk2/Id3	17
GO:0006909	phagocytosis	13/490	159/11002	0.0252249	0.0252249	0.09061	Tlr2/Ldlr/Ccl2/Msr1/Hck/Trex1/Fcgr2b/Il15ra/Nod2/Ncf4/Hspa8/Ptprj/Fpr2	13
GO:0010466	negative regulation of peptidase activity	9/490	95/11002	0.0253874	0.0253874	0.0910922	Birc3/Hgf/Herpud1/Spint1/Bcl2a1d/Serpina3f/Src/Ecm1/Serpina3g	9
GO:0006612	protein targeting to membrane	8/490	80/11002	0.0256147	0.0256147	0.091716	Ccl2/Actr3/Chmp4b/Rab8b/Hspa5/Srp54a/Tram2/Zdhhc2	8
GO:0019229	regulation of vasoconstriction	5/490	38/11002	0.0256336	0.0256336	0.091716	Ahr/Hif1a/Edn1/Ptafr/Cd38	5
GO:0050673	epithelial cell proliferation	18/490	245/11002	0.0256466	0.0256466	0.091716	Ccl12/Ccl2/Hgf/Ccl5/Tnfaip3/Dab2/Cdk6/Hpn/Hmox1/Nod2/Adam17/Adora2b/Nr4a3/Sav1/Nme2/Jaml/Ecm1/Nupr1	18
GO:1903522	regulation of blood circulation	10/490	111/11002	0.0260299	0.0260299	0.0929834	Pde4b/Ahr/Hif1a/Atp1a1/Sumo1/Sri/Edn1/Ptafr/Jak2/Cd38	10
GO:0051051	negative regulation of transport	23/490	335/11002	0.026075	0.026075	0.0930416	Fabp5/Ptger4/Tlr2/Gpr35/Rhbdf2/Il1rn/Tnfaip3/Tlr8/Ppm1f/Anpep/Pea15a/Ahr/Fcgr2b/Rest/Hmox1/Braf/Sumo1/Sri/Edn1/Nlrp3/Rab11fip1/Il27ra/Tnfrsf4	23
GO:0042180	cellular ketone metabolic process	11/490	127/11002	0.0261128	0.0261128	0.0930732	Fabp5/Trex1/Trib3/Dab2/Slc7a11/Rest/Nr4a3/Slc7a7/Eif6/Stard4/Afmid	11
GO:0002009	morphogenesis of an epithelium	21/490	299/11002	0.0262267	0.0262267	0.0931986	Cxcl10/Sdc4/Csf1/Hgf/Apaf1/Clic4/Spint1/Dab2/Mmp14/Vasp/Ahr/Hif1a/Src/Smad4/Arl13b/Pdgfa/Luzp1/Edn1/Ntn1/Lama5/Plxna1	21
GO:0051347	positive regulation of transferase activity	27/490	409/11002	0.0263814	0.0263814	0.0931986	Cdkn1a/Sdc4/Csf1/Il1rn/Hgf/Il12b/Pik3r5/Adam9/Trib3/Ranbp2/Dab2/Tlr1/Cd40/Socs1/Iqgap1/Nod2/Src/Adam17/Daxx/Irgm2/Pdgfa/Fpr2/Edn1/Pik3r6/Malt1/Jak2/Prkcz	27
GO:0032620	interleukin-17 production	4/490	26/11002	0.0266814	0.0266814	0.0931986	Tlr2/Il12b/Nod2/Il27ra	4
GO:1990774	tumor necrosis factor secretion	4/490	26/11002	0.0266814	0.0266814	0.0931986	Ptger4/Tlr2/Ifih1/Il27ra	4
GO:0002726	positive regulation of T cell cytokine production	3/490	15/11002	0.0267843	0.0267843	0.0931986	Nlrp3/Malt1/Prkcz	3
GO:0002827	positive regulation of T-helper 1 type immune response	3/490	15/11002	0.0267843	0.0267843	0.0931986	Il12b/Hlx/Il27ra	3
GO:0010884	positive regulation of lipid storage	3/490	15/11002	0.0267843	0.0267843	0.0931986	Ehd1/Msr1/Ikbke	3
GO:0032691	negative regulation of interleukin-1 beta production	3/490	15/11002	0.0267843	0.0267843	0.0931986	Tnfaip3/Mefv/Nlrp3	3
GO:0033033	negative regulation of myeloid cell apoptotic process	3/490	15/11002	0.0267843	0.0267843	0.0931986	Ccl5/Fcgr2b/Nod2	3
GO:0033194	response to hydroperoxide	3/490	15/11002	0.0267843	0.0267843	0.0931986	Jak2/Cd38/Trpm2	3
GO:0040019	positive regulation of embryonic development	3/490	15/11002	0.0267843	0.0267843	0.0931986	B4galt5/Hspa5/Phldb1	3
GO:0045649	regulation of macrophage differentiation	3/490	15/11002	0.0267843	0.0267843	0.0931986	Csf1/Ptpn2/Zbtb46	3
GO:0045662	negative regulation of myoblast differentiation	3/490	15/11002	0.0267843	0.0267843	0.0931986	Cxcl10/Ccl9/Id3	3
GO:0045822	negative regulation of heart contraction	3/490	15/11002	0.0267843	0.0267843	0.0931986	Atp1a1/Sri/Jak2	3
GO:0070233	negative regulation of T cell apoptotic process	3/490	15/11002	0.0267843	0.0267843	0.0931986	Ccl5/Hif1a/Tnfrsf4	3
GO:0071624	positive regulation of granulocyte chemotaxis	3/490	15/11002	0.0267843	0.0267843	0.0931986	C3ar1/Edn1/Rac2	3
GO:0090023	positive regulation of neutrophil chemotaxis	3/490	15/11002	0.0267843	0.0267843	0.0931986	C3ar1/Edn1/Rac2	3
GO:1902932	positive regulation of alcohol biosynthetic process	3/490	15/11002	0.0267843	0.0267843	0.0931986	Cd244a/Dab2/Ptafr	3
GO:1903319	positive regulation of protein maturation	3/490	15/11002	0.0267843	0.0267843	0.0931986	Mmp14/Hpn/Src	3
GO:2000316	regulation of T-helper 17 type immune response	3/490	15/11002	0.0267843	0.0267843	0.0931986	Nlrp3/Malt1/Il27ra	3
GO:2001185	regulation of CD8-positive, alpha-beta T cell activation	3/490	15/11002	0.0267843	0.0267843	0.0931986	Cd244a/Cd274/Socs1	3
GO:2001258	negative regulation of cation channel activity	3/490	15/11002	0.0267843	0.0267843	0.0931986	Gpr35/Sumo1/Sri	3
GO:0008643	carbohydrate transport	9/490	96/11002	0.0269553	0.0269553	0.0935914	Fabp5/Trib3/Nfe2l2/Sesn2/Pea15a/Slc35d1/Braf/Nr4a3/Edn1	9
GO:0045834	positive regulation of lipid metabolic process	9/490	96/11002	0.0269553	0.0269553	0.0935914	Ldlr/Dab2/Nod2/Src/Ctdnep1/Adora2b/Fpr2/Nr4a3/Stard4	9
GO:0070664	negative regulation of leukocyte proliferation	6/490	52/11002	0.0272126	0.0272126	0.094383	Ccl12/Sdc4/Cd274/Fcgr2b/Cd86/Zc3h12d	6
GO:0015711	organic anion transport	17/490	230/11002	0.0281001	0.0281001	0.0973565	Ldlr/Il1rn/P2ry2/Slc7a1/Nfkbie/Lrrc8c/Slc38a2/Slc7a11/Eprs/Plscr1/Slc7a5/Atp11a/Edn1/Slc7a7/Nos2/Slc25a10/Slc4a3	17
GO:0043124	negative regulation of I-kappaB kinase/NF-kappaB signaling	5/490	39/11002	0.028364	0.028364	0.0981651	Tnip3/Tank/Tnfaip3/Tnip1/Optn	5
GO:1901214	regulation of neuron death	19/490	266/11002	0.0287539	0.0287539	0.0994078	Ccl12/Csf1/Ccl5/Ccl3/Slc7a11/Fcgr2b/Chmp4b/Hif1a/Sod2/Rest/Hmox1/Optn/Daxx/Eif2s1/Braf/Nr4a3/Cpeb4/Jak2/Trpm2	19
GO:0030073	insulin secretion	11/490	129/11002	0.0288794	0.0288794	0.0997348	Il1rn/Ccl5/Vgf/Nadk/Hif1a/Rest/Sri/Nos2/Jak2/Cd38/Trpm2	11
GO:1901654	response to ketone	7/490	67/11002	0.0289223	0.0289223	0.0997758	Acod1/Ptger4/Spp1/Ahr/Src/Eif4ebp1/Jak2	7
GO:0007411	axon guidance	10/490	113/11002	0.029013	0.029013	0.0998749	Nrp2/Sema4a/Vasp/Smad4/Nr4a3/Rac2/Ntn1/Ext1/Nectin1/Plxna1	10
GO:0097485	neuron projection guidance	10/490	113/11002	0.029013	0.029013	0.0998749	Nrp2/Sema4a/Vasp/Smad4/Nr4a3/Rac2/Ntn1/Ext1/Nectin1/Plxna1	10
GO:2000379	positive regulation of reactive oxygen species metabolic process	8/490	82/11002	0.0291856	0.0291856	0.100362	Acod1/Tlr2/Cdkn1a/Nfe2l2/Ulbp1/Sod2/Fpr2/Jak2	8
GO:0006887	exocytosis	18/490	249/11002	0.0295165	0.0295165	0.101273	Sdc4/P2ry2/Ccl5/Hck/Plek/Tnfaip2/Rab8b/Rest/Hmox1/Stx11/Braf/Adora2b/Nr4a3/Ccr1/Rac2/Ptafr/Unc13a/Rab11fip1	18
GO:0006140	regulation of nucleotide metabolic process	6/490	53/11002	0.0295763	0.0295763	0.101273	Trex1/Hif1a/Adora2b/Eif6/Nos2/Nupr1	6
GO:0030101	natural killer cell activation	6/490	53/11002	0.0295763	0.0295763	0.101273	Cd244a/Il12b/Slamf7/Ulbp1/Il15ra/Stx11	6
GO:1900542	regulation of purine nucleotide metabolic process	6/490	53/11002	0.0295763	0.0295763	0.101273	Trex1/Hif1a/Adora2b/Eif6/Nos2/Nupr1	6
GO:0071496	cellular response to external stimulus	14/490	180/11002	0.0301939	0.0301939	0.102609	Ptger4/Cdkn1a/Sik1/Vcam1/Nfe2l2/Sesn2/Hspa5/Asns/Eif2s1/Atp1a1/Adora2b/Foxo1/Cpeb4/Wdr59	14
GO:0002686	negative regulation of leukocyte migration	4/490	27/11002	0.030253	0.030253	0.102609	Ccl12/Ptger4/Gpr18/Il27ra	4
GO:0030225	macrophage differentiation	4/490	27/11002	0.030253	0.030253	0.102609	Tlr2/Csf1/Ptpn2/Zbtb46	4
GO:0032964	collagen biosynthetic process	4/490	27/11002	0.030253	0.030253	0.102609	Ccl2/Tram2/Adora2b/Creb3l1	4
GO:0036230	granulocyte activation	4/490	27/11002	0.030253	0.030253	0.102609	Ccl5/Il18rap/Stx11/Ptafr	4
GO:0043330	response to exogenous dsRNA	4/490	27/11002	0.030253	0.030253	0.102609	Ifih1/Nod2/Zc3hav1/Irak3	4
GO:0045047	protein targeting to ER	4/490	27/11002	0.030253	0.030253	0.102609	Chmp4b/Hspa5/Srp54a/Tram2	4
GO:0048010	vascular endothelial growth factor receptor signaling pathway	4/490	27/11002	0.030253	0.030253	0.102609	Ccl2/Mapkapk2/Hif1a/Bcar1	4
GO:2000108	positive regulation of leukocyte apoptotic process	4/490	27/11002	0.030253	0.030253	0.102609	Hcar2/Cd274/Ccl5/Nr4a3	4
GO:1903825	organic acid transmembrane transport	7/490	68/11002	0.0310547	0.0310547	0.104834	Slc7a1/Lrrc8c/Slc38a2/Slc7a11/Slc7a5/Slc7a7/Slc25a10	7
GO:1905039	carboxylic acid transmembrane transport	7/490	68/11002	0.0310547	0.0310547	0.104834	Slc7a1/Lrrc8c/Slc38a2/Slc7a11/Slc7a5/Slc7a7/Slc25a10	7
GO:0007569	cell aging	8/490	83/11002	0.0310937	0.0310937	0.104834	Cdkn1a/Nampt/Cdk6/Bcl6/Pnpt1/Ing2/Nup62/Plk2	8
GO:0071453	cellular response to oxygen levels	8/490	83/11002	0.0310937	0.0310937	0.104834	Plk3/Nfe2l2/Hif1a/Eif4ebp1/Foxo1/Cpeb4/Vasn/Suv39h2	8
GO:0043281	regulation of cysteine-type endopeptidase activity involved in apoptotic process	12/490	147/11002	0.0311043	0.0311043	0.104834	Birc3/Hgf/Apaf1/Herpud1/Slc11a2/Bcl2a1d/Ppm1f/Rest/Src/Nlrp3/Malt1/Jak2	12
GO:0050792	regulation of viral process	12/490	147/11002	0.0311043	0.0311043	0.104834	Nectin2/Trim30a/Ccl4/Ccl5/Apobec3/Chmp4b/Hpn/Rest/Igf2r/Zc3hav1/Plscr1/Hspa8	12
GO:0045927	positive regulation of growth	15/490	198/11002	0.0312079	0.0312079	0.10485	Cxcl16/Ptger4/Csf1/Sh3pxd2b/Hlx/Ppm1f/Mmp14/Ahr/Hpn/Adam17/Trip10/Edn1/Ntn1/Cd38/Unc13a	15
GO:0071902	positive regulation of protein serine/threonine kinase activity	15/490	198/11002	0.0312079	0.0312079	0.10485	Il1rn/Hgf/Pik3r5/Adam9/Dab2/Cd40/Iqgap1/Nod2/Src/Adam17/Irgm2/Pdgfa/Edn1/Pik3r6/Jak2	15
GO:0006749	glutathione metabolic process	5/490	40/11002	0.0312718	0.0312718	0.10485	Nfe2l2/Ptges/Slc7a11/Sod2/Chac1	5
GO:0006855	drug transmembrane transport	5/490	40/11002	0.0312718	0.0312718	0.10485	Slc7a1/Slc31a1/Slc7a11/Slc7a5/Slc25a10	5
GO:0030193	regulation of blood coagulation	5/490	40/11002	0.0312718	0.0312718	0.10485	Nfe2l2/Plek/Pdgfa/Ptprj/Enpp4	5
GO:0010575	positive regulation of vascular endothelial growth factor production	3/490	16/11002	0.031901	0.031901	0.105532	Hif1a/C3ar1/Adora2b	3
GO:0010592	positive regulation of lamellipodium assembly	3/490	16/11002	0.031901	0.031901	0.105532	Actr3/Fscn1/Rac2	3
GO:0010866	regulation of triglyceride biosynthetic process	3/490	16/11002	0.031901	0.031901	0.105532	Ldlr/Sik1/Ctdnep1	3
GO:0032673	regulation of interleukin-4 production	3/490	16/11002	0.031901	0.031901	0.105532	Icosl/Nlrp3/Prkcz	3
GO:0034063	stress granule assembly	3/490	16/11002	0.031901	0.031901	0.105532	G3bp1/Eif2s1/C9orf72	3
GO:0034138	toll-like receptor 3 signaling pathway	3/490	16/11002	0.031901	0.031901	0.105532	Tnip2/Tnfaip3/Cd86	3
GO:0043011	myeloid dendritic cell differentiation	3/490	16/11002	0.031901	0.031901	0.105532	Batf/Relb/Tnfsf9	3
GO:0046496	nicotinamide nucleotide metabolic process	3/490	16/11002	0.031901	0.031901	0.105532	Nampt/Nadk/Naprt	3
GO:0070498	interleukin-1-mediated signaling pathway	3/490	16/11002	0.031901	0.031901	0.105532	Tnip2/Il1rn/Irak3	3
GO:0071276	cellular response to cadmium ion	3/490	16/11002	0.031901	0.031901	0.105532	Hmox1/Daxx/Sumo1	3
GO:0071498	cellular response to fluid shear stress	3/490	16/11002	0.031901	0.031901	0.105532	Spp1/Nfe2l2/Src	3
GO:0071801	regulation of podosome assembly	3/490	16/11002	0.031901	0.031901	0.105532	Hck/Src/Fscn1	3
GO:0072525	pyridine-containing compound biosynthetic process	3/490	16/11002	0.031901	0.031901	0.105532	Nampt/Nadk/Naprt	3
GO:0031400	negative regulation of protein modification process	28/490	436/11002	0.0327611	0.0327611	0.108266	Prr5l/Cdkn1a/Hgf/Rnf149/Samsn1/Trib3/Tnfaip3/Parp14/Hipk3/Mvp/Ptpn2/Ppm1f/Dab2/Hexim1/N4bp1/Mllt6/Tnip1/Socs1/Dnaja1/Smad4/Mfhas1/Ptprj/C9orf72/Foxo1/Bcor/Irak3/Nup62/Prkcz	28
GO:0014065	phosphatidylinositol 3-kinase signaling	8/490	84/11002	0.0330857	0.0330857	0.109227	Prr5l/Hgf/Ccl5/Pik3r5/Pdgfa/Edn1/Pik3r6/Jak2	8
GO:0051289	protein homotetramerization	7/490	69/11002	0.0332902	0.0332902	0.10979	Gbp5/Vasp/Sod2/Usp16/Impdh2/Crtc2/Trpm2	7
GO:0007568	aging	12/490	149/11002	0.0340293	0.0340293	0.111267	Cdkn1a/Trex1/Nampt/Cdk6/Sod2/Eif2s1/Bcl6/Pnpt1/Rad54l/Ing2/Nup62/Plk2	12
GO:0002931	response to ischemia	4/490	28/11002	0.0340931	0.0340931	0.111267	Csf1/Rest/Panx1/Cpeb4	4
GO:0010883	regulation of lipid storage	4/490	28/11002	0.0340931	0.0340931	0.111267	Ehd1/Msr1/Ptpn2/Ikbke	4
GO:0032607	interferon-alpha production	4/490	28/11002	0.0340931	0.0340931	0.111267	Trex1/Ifih1/Tlr8/Zc3hav1	4
GO:0043551	regulation of phosphatidylinositol 3-kinase activity	4/490	28/11002	0.0340931	0.0340931	0.111267	Pik3r5/Nod2/Src/Fpr2	4
GO:0045776	negative regulation of blood pressure	4/490	28/11002	0.0340931	0.0340931	0.111267	Ahr/Sod2/Nos2/Ptafr	4
GO:0060193	positive regulation of lipase activity	4/490	28/11002	0.0340931	0.0340931	0.111267	Ccl5/Rhoc/Ptafr/Prkcz	4
GO:0062208	positive regulation of pattern recognition receptor signaling pathway	4/490	28/11002	0.0340931	0.0340931	0.111267	Tlr2/Tlr1/Zc3hav1/Mfhas1	4
GO:2000403	positive regulation of lymphocyte migration	4/490	28/11002	0.0340931	0.0340931	0.111267	Cxcl10/Ccl4/Ccl5/Adam17	4
GO:0045665	negative regulation of neuron differentiation	13/490	166/11002	0.0342142	0.0342142	0.111267	Sema4a/Dab2/Ifrd1/Zhx2/Actr3/Il15ra/Rest/Adam17/Katna1/Ntn1/Cd38/Plk2/Id3	13
GO:2000116	regulation of cysteine-type endopeptidase activity	13/490	166/11002	0.0342142	0.0342142	0.111267	Birc3/Hgf/Apaf1/Herpud1/Slc11a2/Bcl2a1d/Ppm1f/Mefv/Rest/Src/Nlrp3/Malt1/Jak2	13
GO:0010876	lipid localization	16/490	218/11002	0.0343407	0.0343407	0.111267	Ehd1/Ldlr/Spp1/P2ry2/Msr1/Ptpn2/Dab2/Eprs/Plscr1/Ikbke/Atp11a/Edn1/Spns2/Nos2/Sqle/Stard4	16
GO:0002204	somatic recombination of immunoglobulin genes involved in immune response	5/490	41/11002	0.0343598	0.0343598	0.111267	Batf/Cd40/Icosl/Bcl6/Il27ra	5
GO:0002208	somatic diversification of immunoglobulins involved in immune response	5/490	41/11002	0.0343598	0.0343598	0.111267	Batf/Cd40/Icosl/Bcl6/Il27ra	5
GO:0002704	negative regulation of leukocyte mediated immunity	5/490	41/11002	0.0343598	0.0343598	0.111267	Clec2d/Fcgr2b/Hmox1/Nod2/Bcl6	5
GO:0045190	isotype switching	5/490	41/11002	0.0343598	0.0343598	0.111267	Batf/Cd40/Icosl/Bcl6/Il27ra	5
GO:0097755	positive regulation of blood vessel diameter	5/490	41/11002	0.0343598	0.0343598	0.111267	Ahr/Hif1a/Sod2/Adora2b/Ptafr	5
GO:1900046	regulation of hemostasis	5/490	41/11002	0.0343598	0.0343598	0.111267	Nfe2l2/Plek/Pdgfa/Ptprj/Enpp4	5
GO:0062014	negative regulation of small molecule metabolic process	6/490	55/11002	0.0346986	0.0346986	0.112251	Sik1/Trib3/Plek/Rest/Nfkb1/Nupr1	6
GO:0003012	muscle system process	15/490	201/11002	0.0349827	0.0349827	0.113057	Ptger4/Pde4b/Gatm/Smad4/Anxa6/Atp1a1/Sumo1/Adora2b/Sri/Nr4a3/Trip10/Edn1/Foxo1/Ptafr/Cd38	15
GO:0061448	connective tissue development	11/490	133/11002	0.0350327	0.0350327	0.113105	Csf1/Creb5/Sh3pxd2b/Zfp516/Mmp13/Hif1a/Anxa6/C3ar1/Edn1/Zeb1/Ecm1	11
GO:1903038	negative regulation of leukocyte cell-cell adhesion	8/490	85/11002	0.0351627	0.0351627	0.113411	Sdc4/Cd274/Hlx/Ptpn2/Socs1/Cd86/Bcl6/Zc3h12d	8
GO:0046777	protein autophosphorylation	14/490	184/11002	0.0354445	0.0354445	0.114206	Hck/Mapkapk2/Mvp/Rap2c/Acvr1b/Iqgap1/Src/Eif2s1/Pdgfa/Hspa8/Csnk1g3/Jak2/Nme2/Irak3	14
GO:0031345	negative regulation of cell projection organization	12/490	150/11002	0.0355632	0.0355632	0.114348	Sema4a/Dab2/Ifrd1/Actr3/Il15ra/Adam17/Katna1/Map4/Ntn1/Cd38/Tbc1d30/Plk2	12
GO:0019233	sensory perception of pain	7/490	70/11002	0.0356305	0.0356305	0.114348	Fabp5/Il1rn/Ccl2/P2ry2/Il12b/Edn1/Ptafr	7
GO:0031532	actin cytoskeleton reorganization	7/490	70/11002	0.0356305	0.0356305	0.114348	Hck/Plek/Actr3/Pip5k1a/Bcar1/Trpm2/Cdc42bpg	7
GO:2001237	negative regulation of extrinsic apoptotic signaling pathway	7/490	70/11002	0.0356305	0.0356305	0.114348	Hgf/Tnfaip3/Dab2/Pea15a/Hmox1/Src/Tnfrsf4	7
GO:0010594	regulation of endothelial cell migration	9/490	101/11002	0.035826	0.035826	0.114861	Sema4a/Nfe2l2/Cd40/Hif1a/Hmox1/Adam17/Adora2b/Bcar1/Plk2	9
GO:0052548	regulation of endopeptidase activity	15/490	202/11002	0.0363116	0.0363116	0.116302	Birc3/Hgf/Apaf1/Herpud1/Slc11a2/Bcl2a1d/Ppm1f/Mefv/Serpina3f/Rest/Src/Nlrp3/Malt1/Jak2/Serpina3g	15
GO:0048562	embryonic organ morphogenesis	11/490	134/11002	0.036705	0.036705	0.117445	Slc39a1/Hlx/Mmp14/Hif1a/Hpn/Rest/Arl13b/Nr4a3/Edn1/Zeb1/Ntn1	11
GO:0016032	viral process	17/490	238/11002	0.0371998	0.0371998	0.118195	Nectin2/Vcam1/Trim30a/Ccl4/Ccl5/Apobec3/Chmp4b/Hpn/Rest/Igf2r/Zc3hav1/Plscr1/Denr/Hspa8/Atg16l2/Slc20a2/Nectin1	17
GO:0006865	amino acid transport	8/490	86/11002	0.0373262	0.0373262	0.118195	Il1rn/Slc7a1/Nfkbie/Lrrc8c/Slc38a2/Slc7a11/Slc7a5/Slc7a7	8
GO:0098662	inorganic cation transmembrane transport	22/490	329/11002	0.0374191	0.0374191	0.118195	Cxcl10/Slc39a14/Gpr35/Pde4b/Slc11a2/Slc39a1/Slc31a1/Hvcn1/Ahr/Kcnh4/Hpn/Diaph1/Panx1/Slc30a4/Atp6v0a1/Slc12a4/Atp1a1/Sumo1/Sri/Kcnj9/Trpm2/Mcoln2	22
GO:0006022	aminoglycan metabolic process	6/490	56/11002	0.0374611	0.0374611	0.118195	Ptger4/B3gnt7/B4galt5/Nfkb1/Slc35d1/Ext1	6
GO:0019362	pyridine nucleotide metabolic process	3/490	17/11002	0.0374895	0.0374895	0.118195	Nampt/Nadk/Naprt	3
GO:0032800	receptor biosynthetic process	3/490	17/11002	0.0374895	0.0374895	0.118195	Hif1a/Edn1/Jak2	3
GO:0033005	positive regulation of mast cell activation	3/490	17/11002	0.0374895	0.0374895	0.118195	Nectin2/Adora2b/Nr4a3	3
GO:0046639	negative regulation of alpha-beta T cell differentiation	3/490	17/11002	0.0374895	0.0374895	0.118195	Hlx/Socs1/Bcl6	3
GO:0048483	autonomic nervous system development	3/490	17/11002	0.0374895	0.0374895	0.118195	Vcam1/Nrp2/Hlx	3
GO:0060218	hematopoietic stem cell differentiation	3/490	17/11002	0.0374895	0.0374895	0.118195	Batf/Nfe2l2/Cdk6	3
GO:0071359	cellular response to dsRNA	3/490	17/11002	0.0374895	0.0374895	0.118195	Ifih1/Zc3hav1/Nfkb1	3
GO:0090075	relaxation of muscle	3/490	17/11002	0.0374895	0.0374895	0.118195	Pde4b/Adora2b/Sri	3
GO:1901385	regulation of voltage-gated calcium channel activity	3/490	17/11002	0.0374895	0.0374895	0.118195	Gpr35/Pde4b/Sri	3
GO:1904738	vascular associated smooth muscle cell migration	3/490	17/11002	0.0374895	0.0374895	0.118195	Nfe2l2/Iqgap1/Nr4a3	3
GO:1904752	regulation of vascular associated smooth muscle cell migration	3/490	17/11002	0.0374895	0.0374895	0.118195	Nfe2l2/Iqgap1/Nr4a3	3
GO:0001913	T cell mediated cytotoxicity	5/490	42/11002	0.0376302	0.0376302	0.118291	Nectin2/Il12b/Ulbp1/Stx11/Hspa8	5
GO:0051384	response to glucocorticoid	5/490	42/11002	0.0376302	0.0376302	0.118291	Il1rn/Adam9/Rest/Eif4ebp1/Jak2	5
GO:1990928	response to amino acid starvation	5/490	42/11002	0.0376302	0.0376302	0.118291	Cdkn1a/Sesn2/Eif2s1/Eif4ebp1/Wdr59	5
GO:0048729	tissue morphogenesis	23/490	348/11002	0.0379347	0.0379347	0.119132	Cxcl10/Sdc4/Csf1/Hgf/Apaf1/Clic4/Nrp2/Spint1/Dab2/Mmp14/Vasp/Ahr/Hif1a/Src/Smad4/Arl13b/Pdgfa/Nr4a3/Luzp1/Edn1/Ntn1/Lama5/Plxna1	23
GO:0051928	positive regulation of calcium ion transport	7/490	71/11002	0.038077	0.038077	0.119279	Ccl12/Cxcl10/Ccl4/Ccl5/Sumo1/Sri/Ccr1	7
GO:0051961	negative regulation of nervous system development	16/490	221/11002	0.0381985	0.0381985	0.119279	Tlr2/Ldlr/Sema4a/Dab2/Ifrd1/Zhx2/Actr3/Olfm1/Il15ra/Rest/Adam17/Katna1/Ntn1/Cd38/Plk2/Id3	16
GO:0010718	positive regulation of epithelial to mesenchymal transition	4/490	29/11002	0.0382035	0.0382035	0.119279	Dab2/Glipr2/Smad4/Bambi	4
GO:0030517	negative regulation of axon extension	4/490	29/11002	0.0382035	0.0382035	0.119279	Sema4a/Ifrd1/Actr3/Ntn1	4
GO:0048536	spleen development	4/490	29/11002	0.0382035	0.0382035	0.119279	Nfkb2/Ahr/Adam17/Tet2	4
GO:0098661	inorganic anion transmembrane transport	4/490	29/11002	0.0382035	0.0382035	0.119279	Slc12a4/Slc20a2/Ptafr/Slc25a10	4
GO:1990138	neuron projection extension	11/490	135/11002	0.0384326	0.0384326	0.119803	Nrp2/Sema4a/Ifrd1/Actr3/Olfm1/Iqgap1/C9orf72/Ntn1/Unc13a/Prkcz/Plxna1	11
GO:0051656	establishment of organelle localization	19/490	275/11002	0.0384458	0.0384458	0.119803	Kif2c/Nectin2/Rrs1/Sdad1/Actr3/Chmp4b/Hif1a/Hmox1/Kif1a/Map4/Adora2b/Nr4a3/Eif6/Rac2/Ntn1/Nup62/Fhod1/Prkcz/Cenpq	19
GO:0050768	negative regulation of neurogenesis	15/490	204/11002	0.0390785	0.0390785	0.121657	Ldlr/Sema4a/Dab2/Ifrd1/Zhx2/Actr3/Olfm1/Il15ra/Rest/Adam17/Katna1/Ntn1/Cd38/Plk2/Id3	15
GO:0006694	steroid biosynthetic process	8/490	87/11002	0.0395775	0.0395775	0.122736	Ch25h/Dab2/Rest/Nfkb1/Atp1a1/Adora2b/Sqle/Stard4	8
GO:0035967	cellular response to topologically incorrect protein	8/490	87/11002	0.0395775	0.0395775	0.122736	Herpud1/Ptpn2/Nfe2l2/Hspa5/Optn/Daxx/Hspa8/Creb3l1	8
GO:0071248	cellular response to metal ion	8/490	87/11002	0.0395775	0.0395775	0.122736	Clic4/Hvcn1/Hmox1/Iqgap1/Daxx/Braf/Sumo1/Trpm2	8
GO:0071901	negative regulation of protein serine/threonine kinase activity	8/490	87/11002	0.0395775	0.0395775	0.122736	Cdkn1a/Tnfaip3/Hipk3/Hexim1/Dnaja1/Ptprj/Irak3/Nup62	8
GO:0048015	phosphatidylinositol-mediated signaling	9/490	103/11002	0.0398773	0.0398773	0.12331	Prr5l/Hgf/Ccl5/Pik3r5/Pdgfa/Edn1/Pik3r6/Ptafr/Jak2	9
GO:0050796	regulation of insulin secretion	9/490	103/11002	0.0398773	0.0398773	0.12331	Ccl5/Nadk/Hif1a/Rest/Sri/Nos2/Jak2/Cd38/Trpm2	9
GO:0071383	cellular response to steroid hormone stimulus	9/490	103/11002	0.0398773	0.0398773	0.12331	Acod1/Dab2/Rest/Src/Dnaja1/Daxx/Atp1a1/Eif4ebp1/Jak2	9
GO:0051702	interaction with symbiont	6/490	57/11002	0.0403604	0.0403604	0.124684	Ccl4/Ccl5/Hpn/Rest/Igf2r/Hspa8	6
GO:0070301	cellular response to hydrogen peroxide	7/490	72/11002	0.0406313	0.0406313	0.125401	Hgf/Tnfaip3/Nfe2l2/Lcn2/Src/Nr4a3/Trpm2	7
GO:0031960	response to corticosteroid	5/490	43/11002	0.0410849	0.0410849	0.126437	Il1rn/Adam9/Rest/Eif4ebp1/Jak2	5
GO:0043618	regulation of transcription from RNA polymerase II promoter in response to stress	5/490	43/11002	0.0410849	0.0410849	0.126437	Nfe2l2/Sesn2/Hif1a/Hmox1/Creb3l1	5
GO:0050818	regulation of coagulation	5/490	43/11002	0.0410849	0.0410849	0.126437	Nfe2l2/Plek/Pdgfa/Ptprj/Enpp4	5
GO:0007178	transmembrane receptor protein serine/threonine kinase signaling pathway	14/490	188/11002	0.0413236	0.0413236	0.127028	Ccl2/Adam9/Dab2/Hivep1/Acvr1b/Hspa5/Src/Adam17/Smad4/Bambi/Cdh5/Zeb1/Ing2/Vasn	14
GO:1903364	positive regulation of cellular protein catabolic process	10/490	120/11002	0.0413558	0.0413558	0.127028	Ldlr/Herpud1/Rnf19b/Plk3/Trib3/Tnfaip3/Dab2/Sumo1/Plk2/Nupr1	10
GO:0070997	neuron death	20/490	296/11002	0.0417765	0.0417765	0.128198	Ccl12/Csf1/Apaf1/Ccl5/Ccl3/Slc7a11/Fcgr2b/Chmp4b/Hif1a/Sod2/Rest/Hmox1/Optn/Daxx/Eif2s1/Braf/Nr4a3/Cpeb4/Jak2/Trpm2	20
GO:0031929	TOR signaling	9/490	104/11002	0.042015	0.042015	0.128808	Prr5l/Sik1/Slc7a1/Sesn2/Hif1a/Sh3bp4/Eif4ebp1/C9orf72/Wdr59	9
GO:0002823	negative regulation of adaptive immune response based on somatic recombination of immune receptors built from immunoglobulin superfamily domains	4/490	30/11002	0.0425852	0.0425852	0.129447	Fcgr2b/Nod2/Bcl6/Il27ra	4
GO:0042398	cellular modified amino acid biosynthetic process	4/490	30/11002	0.0425852	0.0425852	0.129447	Nfe2l2/Gatm/Slc7a11/Plscr1	4
GO:0043030	regulation of macrophage activation	4/490	30/11002	0.0425852	0.0425852	0.129447	Ldlr/Tnip2/Ulbp1/Mfhas1	4
GO:0045581	negative regulation of T cell differentiation	4/490	30/11002	0.0425852	0.0425852	0.129447	Hlx/Ptpn2/Socs1/Bcl6	4
GO:0046636	negative regulation of alpha-beta T cell activation	4/490	30/11002	0.0425852	0.0425852	0.129447	Cd274/Hlx/Socs1/Bcl6	4
GO:0050691	regulation of defense response to virus by host	4/490	30/11002	0.0425852	0.0425852	0.129447	Il12b/Ccl5/Zc3hav1/Il27	4
GO:0070232	regulation of T cell apoptotic process	4/490	30/11002	0.0425852	0.0425852	0.129447	Cd274/Ccl5/Hif1a/Tnfrsf4	4
GO:0070542	response to fatty acid	4/490	30/11002	0.0425852	0.0425852	0.129447	Ptger4/Tlr2/Ldlr/Id3	4
GO:1900015	regulation of cytokine production involved in inflammatory response	4/490	30/11002	0.0425852	0.0425852	0.129447	Gbp5/Mefv/Nod2/Nos2	4
GO:0032436	positive regulation of proteasomal ubiquitin-dependent protein catabolic process	7/490	73/11002	0.0432947	0.0432947	0.13051	Herpud1/Rnf19b/Plk3/Trib3/Dab2/Sumo1/Plk2	7
GO:0036294	cellular response to decreased oxygen levels	7/490	73/11002	0.0432947	0.0432947	0.13051	Plk3/Nfe2l2/Hif1a/Eif4ebp1/Cpeb4/Vasn/Suv39h2	7
GO:0045638	negative regulation of myeloid cell differentiation	6/490	58/11002	0.043398	0.043398	0.13051	Ptpn2/Cdk6/Clec2d/Paf1/Zbtb46/Nme2	6
GO:1901224	positive regulation of NIK/NF-kappaB signaling	6/490	58/11002	0.043398	0.043398	0.13051	Tlr2/Cd14/Tlr1/Nod2/Edn1/Malt1	6
GO:0007035	vacuolar acidification	3/490	18/11002	0.0435423	0.0435423	0.13051	Clic4/Atp6v0c/Atp6v0a1	3
GO:0010470	regulation of gastrulation	3/490	18/11002	0.0435423	0.0435423	0.13051	Il1rn/Tnfaip3/Phldb1	3
GO:0010893	positive regulation of steroid biosynthetic process	3/490	18/11002	0.0435423	0.0435423	0.13051	Dab2/Adora2b/Stard4	3
GO:0043171	peptide catabolic process	3/490	18/11002	0.0435423	0.0435423	0.13051	Anpep/Mmp13/Chac1	3
GO:0043552	positive regulation of phosphatidylinositol 3-kinase activity	3/490	18/11002	0.0435423	0.0435423	0.13051	Nod2/Src/Fpr2	3
GO:0043902	positive regulation of multi-organism process	3/490	18/11002	0.0435423	0.0435423	0.13051	P2ry2/Acvr1b/Ptafr	3
GO:0045736	negative regulation of cyclin-dependent protein serine/threonine kinase activity	3/490	18/11002	0.0435423	0.0435423	0.13051	Cdkn1a/Tnfaip3/Hexim1	3
GO:0097150	neuronal stem cell population maintenance	3/490	18/11002	0.0435423	0.0435423	0.13051	Rest/Foxo1/Fancd2	3
GO:0120178	steroid hormone biosynthetic process	3/490	18/11002	0.0435423	0.0435423	0.13051	Dab2/Rest/Atp1a1	3
GO:1901032	negative regulation of response to reactive oxygen species	3/490	18/11002	0.0435423	0.0435423	0.13051	Hgf/Nfe2l2/Nr4a3	3
GO:1903206	negative regulation of hydrogen peroxide-induced cell death	3/490	18/11002	0.0435423	0.0435423	0.13051	Hgf/Nfe2l2/Nr4a3	3
GO:0006469	negative regulation of protein kinase activity	12/490	155/11002	0.0439727	0.0439727	0.131677	Cdkn1a/Trib3/Tnfaip3/Hipk3/Mvp/Ptpn2/Ppm1f/Hexim1/Dnaja1/Ptprj/Irak3/Nup62	12
GO:0048017	inositol lipid-mediated signaling	9/490	105/11002	0.0442286	0.0442286	0.132308	Prr5l/Hgf/Ccl5/Pik3r5/Pdgfa/Edn1/Pik3r6/Ptafr/Jak2	9
GO:0035150	regulation of tube size	8/490	89/11002	0.0443477	0.0443477	0.132308	P2ry2/Ahr/Hif1a/Sod2/Adora2b/Edn1/Ptafr/Cd38	8
GO:0035296	regulation of tube diameter	8/490	89/11002	0.0443477	0.0443477	0.132308	P2ry2/Ahr/Hif1a/Sod2/Adora2b/Edn1/Ptafr/Cd38	8
GO:0097746	regulation of blood vessel diameter	8/490	89/11002	0.0443477	0.0443477	0.132308	P2ry2/Ahr/Hif1a/Sod2/Adora2b/Edn1/Ptafr/Cd38	8
GO:0050854	regulation of antigen receptor-mediated signaling pathway	5/490	44/11002	0.0447254	0.0447254	0.133066	Nectin2/Ptpn2/Fcgr2b/Ptprj/Malt1	5
GO:0070613	regulation of protein processing	5/490	44/11002	0.0447254	0.0447254	0.133066	Birc3/Mmp14/Hpn/Chac1/Src	5
GO:0110110	positive regulation of animal organ morphogenesis	5/490	44/11002	0.0447254	0.0447254	0.133066	Csf1/Tnfaip3/Hpn/Smad4/Edn1	5
GO:0060560	developmental growth involved in morphogenesis	13/490	173/11002	0.0453028	0.0453028	0.134659	Csf1/Nrp2/Sema4a/Ifrd1/Actr3/Ahr/Olfm1/Iqgap1/C9orf72/Ntn1/Unc13a/Prkcz/Plxna1	13
GO:0043903	regulation of interspecies interactions between organisms	12/490	156/11002	0.045807	0.045807	0.136032	Nectin2/Trim30a/Ccl4/Ccl5/Apobec3/Chmp4b/Hpn/Rest/Igf2r/Zc3hav1/Plscr1/Hspa8	12
GO:1903313	positive regulation of mRNA metabolic process	7/490	74/11002	0.0460684	0.0460684	0.136682	Prr5l/Nup98/Paf1/Zc3hav1/Hspa8/Pnpt1/Zc3h12d	7
GO:0006575	cellular modified amino acid metabolic process	9/490	106/11002	0.0465189	0.0465189	0.137552	Nfe2l2/Ptges/Gatm/Slc7a11/Sod2/Hpn/Chac1/Plscr1/Mthfd2	9
GO:0034101	erythrocyte homeostasis	9/490	106/11002	0.0465189	0.0465189	0.137552	Slc11a2/Ptpn2/Cdk6/Acvr1b/Hif1a/Hmox1/Mfhas1/Bcl6/Jak2	9
GO:0008585	female gonad development	6/490	59/11002	0.0465751	0.0465751	0.137552	Ptger4/Vgf/Ahr/Src/Smad4/Nupr1	6
GO:0010927	cellular component assembly involved in morphogenesis	6/490	59/11002	0.0465751	0.0465751	0.137552	Tlr2/Nectin2/Csrp1/Smad4/Edn1/Phldb1	6
GO:0030282	bone mineralization	6/490	59/11002	0.0465751	0.0465751	0.137552	Snx10/Mmp13/Hif1a/Ccr1/Bcor/Ecm1	6
GO:0030183	B cell differentiation	8/490	90/11002	0.0468687	0.0468687	0.138118	Tnfaip3/Ptpn2/Mmp14/Ahr/Adam17/Bcl6/Ptprj/Malt1	8
GO:0031099	regeneration	8/490	90/11002	0.0468687	0.0468687	0.138118	Cdkn1a/Hgf/Igsf10/Ifrd1/Hmox1/Adam17/Braf/Jak2	8
GO:0002534	cytokine production involved in inflammatory response	4/490	31/11002	0.0472381	0.0472381	0.138118	Gbp5/Mefv/Nod2/Nos2	4
GO:0010762	regulation of fibroblast migration	4/490	31/11002	0.0472381	0.0472381	0.138118	Prr5l/Sdc4/Actr3/Braf	4
GO:0034113	heterotypic cell-cell adhesion	4/490	31/11002	0.0472381	0.0472381	0.138118	Il1rn/Vcam1/Itga5/Tnfaip3	4
GO:0045668	negative regulation of osteoblast differentiation	4/490	31/11002	0.0472381	0.0472381	0.138118	Noct/Cdk6/Ahr/Id3	4
GO:0046627	negative regulation of insulin receptor signaling pathway	4/490	31/11002	0.0472381	0.0472381	0.138118	Gm9847/Ptpn2/Socs1/Prkcz	4
GO:0050922	negative regulation of chemotaxis	4/490	31/11002	0.0472381	0.0472381	0.138118	Ccl12/Sema4a/Ptpn2/Gpr18	4
GO:0060350	endochondral bone morphogenesis	4/490	31/11002	0.0472381	0.0472381	0.138118	Nab1/Mmp14/Mmp13/Anxa6	4
GO:0072599	establishment of protein localization to endoplasmic reticulum	4/490	31/11002	0.0472381	0.0472381	0.138118	Chmp4b/Hspa5/Srp54a/Tram2	4
GO:1902743	regulation of lamellipodium organization	4/490	31/11002	0.0472381	0.0472381	0.138118	Actr3/Src/Fscn1/Rac2	4
[truncated: 11 more rows]

## Sheet: cluster 3
ID	Description	GeneRatio	BgRatio	pvalue	p.adjust	qvalue	geneID	Count
[truncated: 606 more rows]

[truncated: 5 more sheets: cluster 4, cluster 5, cluster 6, cluster 7, genes_and_clusters]
