# Supplementary material for: Epigenetic regulation of innate immune memory in microglia
Source: J Neuroinflammation. 2022 May 14;19:111. doi: 10.1186/s12974-022-02463-5 (PMC9107649; doi:10.1186/s12974-022-02463-5)
Supplement: Supplementary file 9 — Additional file 9: Annotated differential ATAC, H3K4me3 and H3K27ac peaks in microglia of PL versus PP, PL versus LL and LL versus LP mice (related to Fig. 3A, 3B, 3C). [file 12974_2022_2463_MOESM9_ESM.xlsx]

## Sheet: ATAC_PL_vs_PP
seqnames	start	end	width	strand	summit	M_value	A_value	P_value	Peak_Group	normalized_read_density_in_ATAC_PL	normalized_read_density_in_ATAC_PP	annotation	geneChr	geneStart	geneEnd	geneLength	geneStrand	geneId	transcriptId	distanceToTSS	ENSEMBL	SYMBOL	GENENAME
chr11	117961846	117970609	8764	*	1811	2.90221	8.04856	4.96527e-120	merged_common	723.909	96.8349	Promoter	11	117966079	117969186	3108	2	12702	ENSMUST00000054002.3	0	ENSMUSG00000053113	Socs3	suppressor of cytokine signaling 3
chr15	48836971	48841218	4248	*	1018	-2.55181	8.10486	1.52164e-96	merged_common	113.689	666.64	Distal Intergenic	15	47580722	48792063	1211342	2	239420	ENSMUST00000162830.7	-44908	ENSMUSG00000022311	Csmd3	CUB and Sushi multiple domains 3
chr11	86586166	86587730	1565	*	922	3.84964	6.85787	2.65546e-94	merged_common	440.406	30.5489	Promoter	11	86585020	86586994	1975	2	75909	ENSMUST00000145846.1	0	ENSMUSG00000018171	Vmp1	vacuole membrane protein 1
chr18	4335530	4337642	2113	*	1101	1.89355	8.85482	2.3627e-89	merged_common	892.43	240.192	Promoter	18	4331341	4336295	4955	2	26410	ENSMUST00000105472.2	0	ENSMUSG00000024235	Map3k8	mitogen-activated protein kinase kinase kinase 8
chr6	73709239	73712298	3060	*	1733	-1.89052	8.84781	9.7596e-89	merged_common	239.279	887.172	Distal Intergenic	6	73586109	73608673	22565	2	102634075	ENSMUST00000204638.1	-100566	ENSMUSG00000107441	Gm31747	predicted gene, 31747
chr5	32132455	32133966	1512	*	856	4.09081	6.55426	2.56539e-87	ATAC_PL_unique	387.933	22.7667	Exon (ENSMUST00000192674.1/ENSMUST00000192674.1, exon 1 of 1)	5	32135801	32157842	22042	1	14284	ENSMUST00000031017.10	-1835	ENSMUSG00000029135	Fosl2	fos-like antigen 2
chr7	121516613	121518141	1529	*	882	-1.92503	8.69505	8.25544e-83	merged_common	212.679	807.638	Intron (ENSMUST00000205739.1/75793, intron 2 of 5)	7	121468844	121589834	120991	2	75793	ENSMUST00000205739.1	71693	NA	4933432K03Rik	RIKEN cDNA 4933432K03 gene
chr7	19815178	19818238	3061	*	2458	2.65678	7.7478	5.19457e-82	merged_common	539.766	85.5923	Promoter	7	19811495	19815996	4502	2	12051	ENSMUST00000141996.1	0	ENSMUSG00000053175	Bcl3	B cell leukemia/lymphoma 3
chr3	79689737	79690920	1184	*	851	-2.4166	7.86553	7.37614e-74	merged_common	100.931	538.884	Intron (ENSMUST00000078527.12/381489, intron 2 of 17)	3	79655293	79667853	12561	2	381489	ENSMUST00000183040.2	-21884	ENSMUSG00000034009	Rxfp1	relaxin/insulin-like family peptide receptor 1
chr16	93246661	93247533	873	*	459	3.46411	6.79961	4.06621e-73	merged_common	370.073	33.5341	Distal Intergenic	16	93343724	93353189	9466	2	69857	ENSMUST00000185971.6	105656	ENSMUSG00000100277	1810053B23Rik	RIKEN cDNA 1810053B23 gene
chr5	68734482	68736351	1870	*	907	-1.37317	9.45277	8.9511e-72	merged_common	435.396	1127.85	Distal Intergenic	5	69296209	69341677	45469	2	243043	ENSMUST00000087231.3	605326	ENSMUSG00000037653	Kctd8	potassium channel tetramerisation domain containing 8
chr17	56133194	56135168	1975	*	788	1.76951	8.68896	6.64298e-70	merged_common	762.036	223.511	Promoter	17	56123767	56133843	10077	2	20359	ENSMUST00000167545.2	0	ENSMUSG00000001227	Sema6b	sema domain, transmembrane domain (TM), and cytoplasmic domain, (semaphorin) 6B
chr13	106759828	106761981	2154	*	573	-1.53665	9.0749	4.49357e-69	merged_common	316.613	918.557	Exon (ENSMUST00000225713.1/ENSMUST00000225713.1, exon 1 of 2)	13	106811888	106836321	24434	2	76582	ENSMUST00000191312.1	74340	ENSMUSG00000042590	Ipo11	importin 11
chr4	57027032	57028883	1852	*	1136	3.09628	7.01551	5.55405e-68	merged_common	378.369	44.2428	Promoter	4	56995678	57027676	31999	2	54357	ENSMUST00000044022.4	0	ENSMUSG00000028434	Epb41l4b	erythrocyte membrane protein band 4.1 like 4b
chr2	167814893	167815845	953	*	406	3.11625	6.96106	1.49817e-66	merged_common	366.885	42.3102	Distal Intergenic	2	167932057	167974737	42681	1	19246	ENSMUST00000147210.7	-116212	ENSMUSG00000027540	Ptpn1	protein tyrosine phosphatase, non-receptor type 1
chr1	36303009	36304354	1346	*	652	3.53054	6.55785	1.36752e-64	merged_common	320.264	27.7147	Distal Intergenic	1	36307733	36319203	11471	1	214855	ENSMUST00000126413.7	-3379	ENSMUSG00000037447	Arid5a	AT rich interactive domain 5A (MRF1-like)
chr15	69077032	69079966	2935	*	1215	-1.88024	8.3772	4.5264e-64	merged_common	173.294	637.959	Intron (ENSMUST00000022954.6/13992, intron 7 of 8)	15	68930068	69024765	94698	1	13992	ENSMUST00000230073.1	146964	ENSMUSG00000022332	Khdrbs3	KH domain containing, RNA binding, signal transduction associated 3
chr12	52397383	52398805	1423	*	589	-2.08647	8.06731	1.13419e-63	merged_common	130.154	552.774	Distal Intergenic	12	52475739	52480609	4871	2	102638611	ENSMUST00000219885.1	81804	ENSMUSG00000111982	Gm35135	predicted gene, 35135
chr1	56360238	56361222	985	*	439	-2.89161	7.11629	1.89316e-63	merged_common	50.9314	377.961	Distal Intergenic	1	56636044	56637435	1392	2	71066	ENSMUST00000062085.5	276213	ENSMUSG00000045336	Hsfy2	heat shock transcription factor, Y-linked 2
chr3	25052734	25054045	1312	*	473	-2.15784	7.96912	2.7598e-63	merged_common	118.62	529.336	Intron (ENSMUST00000204227.1/635702, intron 1 of 2)	3	24551210	25144261	593052	2	635702	ENSMUST00000204227.1	90216	ENSMUSG00000102758	Naaladl2	N-acetylated alpha-linked acidic dipeptidase-like 2
chr2	90542190	90543685	1496	*	642	2.83258	7.16989	4.40192e-63	merged_common	384.324	53.9518	Intron (ENSMUST00000168621.2/19271, intron 1 of 23)	2	90432889	90580647	147759	2	19271	ENSMUST00000168621.2	36962	ENSMUSG00000025314	Ptprj	protein tyrosine phosphatase, receptor type, J
chr1	86262976	86264352	1377	*	734	2.36467	7.68285	2.43061e-62	merged_common	466.323	90.542	Intron (ENSMUST00000113309.8/78795, intron 23 of 24)	1	86244566	86269086	24521	1	78795	ENSMUST00000126579.1	18410	ENSMUSG00000062590	Armc9	armadillo repeat containing 9
chr9	89266557	89269510	2954	*	1171	-1.68547	8.64322	7.53573e-62	merged_common	222.936	717.062	Intron (ENSMUST00000186009.1/107885, intron 1 of 3)	9	89218454	89240170	21717	1	107885	ENSMUST00000147644.1	48103	ENSMUSG00000066442	Mthfs	5, 10-methenyltetrahydrofolate synthetase
chr10	82794852	82795726	875	*	637	2.87532	7.08414	1.31212e-61	merged_common	367.551	50.091	Distal Intergenic	10	82812123	82824242	12120	1	70003	ENSMUST00000076984.7	-16397	ENSMUSG00000056821	1700028I16Rik	RIKEN cDNA 1700028I16 gene
chr11	4232338	4233337	1000	*	490	3.18723	6.7835	4.45746e-61	merged_common	332.478	36.5015	Distal Intergenic	11	4236420	4239664	3245	1	18413	ENSMUST00000131764.1	-3083	ENSMUSG00000058755	Osm	oncostatin M
chr16	73596908	73598485	1578	*	743	-1.72517	8.53399	4.02547e-60	merged_common	203.856	673.986	Distal Intergenic	16	73894664	73899885	5222	2	268902	ENSMUST00000149114.1	301400	ENSMUSG00000052516	Robo2	roundabout guidance receptor 2
chr10	109296386	109297780	1395	*	616	-2.05256	8.00244	7.22473e-59	merged_common	125.902	522.295	Distal Intergenic	10	108497652	109010982	513331	2	20979	ENSMUST00000064054.13	-285404	ENSMUSG00000035864	Syt1	synaptotagmin I
chr7	55744153	55745347	1195	*	654	-2.5506	7.3513	2.5479e-58	merged_common	67.4618	395.244	Distal Intergenic	7	55768178	55772523	4346	1	233274	ENSMUST00000172988.7	-22831	ENSMUSG00000051504	Siglech	sialic acid binding Ig-like lectin H
chr9	120001569	120002643	1075	*	615	2.82362	7.03085	2.53731e-57	merged_common	347.932	49.1473	Intron (ENSMUST00000177637.1/13051, intron 2 of 2)	9	119974261	119984658	10398	2	215418	ENSMUST00000213936.1	-16911	ENSMUSG00000032515	Csrnp1	cysteine-serine-rich nuclear protein 1
chr7	28371473	28379945	8473	*	4301	1.44496	8.95604	1.17758e-56	merged_common	819.454	300.988	Promoter	7	28359604	28372233	12630	2	101497	ENSMUST00000094644.10	0	ENSMUSG00000037552	Plekhg2	pleckstrin homology domain containing, family G (with RhoGef domain) member 2
chr5	43391027	43393970	2944	*	2413	-1.47438	8.88345	3.10043e-56	merged_common	283.314	787.229	Distal Intergenic	5	43515538	43618803	103266	1	109323	ENSMUST00000076939.9	-121568	ENSMUSG00000061535	C1qtnf7	C1q and tumor necrosis factor related protein 7
chr3	20304075	20305980	1906	*	882	-1.08803	9.74003	1.7725e-55	merged_common	586.511	1246.83	Distal Intergenic	3	20248264	20275733	27470	2	76703	ENSMUST00000011607.5	-28342	ENSMUSG00000011463	Cpb1	carboxypeptidase B1 (tissue)
chr3	157616563	157617685	1123	*	567	-2.64931	7.15955	4.37419e-55	merged_common	57.0793	358.097	Intron (ENSMUST00000041175.12/19218, intron 2 of 2)	3	157566900	157644756	77857	1	19218	ENSMUST00000173533.1	49663	ENSMUSG00000040016	Ptger3	prostaglandin E receptor 3 (subtype EP3)
chr4	71488181	71490457	2277	*	849	-1.07038	9.7678	1.0005e-54	merged_common	601.579	1263.31	Distal Intergenic	4	72118220	72120734	2515	2	21885	ENSMUST00000123259.1	630277	ENSMUSG00000008305	Tle1	transducin-like enhancer of split 1
chr13	70883049	70885783	2735	*	1088	-1.74081	8.33221	1.37591e-53	merged_common	176.29	589.201	Promoter	13	70882948	70884503	1556	1	77166	ENSMUST00000225672.1	101	ENSMUSG00000021600	8030423J24Rik	RIKEN cDNA 8030423J24 gene
chr9	7870522	7873777	3256	*	2469	1.22632	9.33709	2.42696e-53	merged_common	989.29	422.829	Promoter	9	7848699	7873024	24326	2	11796	ENSMUST00000013949.14	0	ENSMUSG00000032000	Birc3	baculoviral IAP repeat-containing 3
chr16	84782660	84784744	2085	*	878	-2.02799	7.87693	3.2185e-53	merged_common	116.399	474.717	Intron (ENSMUST00000114195.7/67374, intron 1 of 9)	16	84774386	84810996	36611	1	67374	ENSMUST00000098407.2	8274	ENSMUSG00000053062	Jam2	junction adhesion molecule 2
chr4	112255641	112256866	1226	*	582	-2.51857	7.24279	5.24232e-53	merged_common	63.2724	362.56	Exon (ENSMUST00000038455.11/195564, exon 4 of 8)	4	112232245	112300468	68224	1	195564	ENSMUST00000170945.1	23396	ENSMUSG00000070868	Skint3	selection and upkeep of intraepithelial T cells 3
chr9	70284301	70285342	1042	*	408	2.72507	7.01058	7.38792e-53	merged_common	331.557	50.1454	Intron (ENSMUST00000213863.1/71602, intron 1 of 3)	9	70207368	70399766	192399	1	71602	ENSMUST00000034745.8	76933	ENSMUSG00000032220	Myo1e	myosin IE
chr6	129712666	129714662	1997	*	1129	-1.80513	8.20011	1.02756e-52	merged_common	157.319	549.766	Intron (ENSMUST00000088046.1/503550, intron 1 of 5)	6	129697218	129717132	19915	2	503550	ENSMUST00000088046.1	2470	ENSMUSG00000067610	Klri1	killer cell lectin-like receptor family I member 1
chr17	77932005	77933731	1727	*	1338	-1.77999	8.24433	1.42506e-52	merged_common	163.635	561.961	Distal Intergenic	17	78200248	78376592	176345	1	50766	ENSMUST00000112498.2	-266517	ENSMUSG00000024074	Crim1	cysteine rich transmembrane BMP regulator 1 (chordin like)
chr6	129406004	129408362	2359	*	1450	-1.49982	8.71123	7.02862e-52	merged_common	249.228	704.834	Promoter	6	129408862	129424763	15902	1	232414	ENSMUST00000058352.14	-500	ENSMUSG00000046080	Clec9a	C-type lectin domain family 9, member a
chr17	37524389	37526472	2084	*	1222	-2.05721	7.7976	1.0024e-51	merged_common	109.061	453.892	5' UTR	17	37529957	37530997	1041	1	545205	ENSMUST00000097325.3	-3485	ENSMUSG00000090675	Olfr111	olfactory receptor 111
chr18	34862334	34866823	4490	*	3285	4.30501	5.61711	1.03323e-51	ATAC_PL_unique	218.216	11.0395	3' UTR	18	34861207	34864956	3750	1	13653	ENSMUST00000165033.1	1127	ENSMUSG00000038418	Egr1	early growth response 1
chr6	110019887	110020884	998	*	507	-2.72549	6.97126	2.82808e-51	merged_common	48.7901	322.69	Distal Intergenic	6	110645581	111497090	851510	1	108073	ENSMUST00000174018.7	-624697	ENSMUSG00000056755	Grm7	glutamate receptor, metabotropic 7
chr15	102150107	102151511	1405	*	762	1.81853	8.11876	1.68258e-50	merged_common	522.043	148.004	Promoter	15	102150526	102163469	12944	1	223920	ENSMUST00000023806.13	0	ENSMUSG00000023045	Soat2	sterol O-acyltransferase 2
chr10	40499148	40500530	1383	*	898	-1.61075	8.468	2.02908e-50	merged_common	202.619	618.82	Distal Intergenic	10	40570336	40604132	33797	1	70840	ENSMUST00000078314.13	-69806	ENSMUSG00000019834	Slc22a16	solute carrier family 22 (organic cation transporter), member 16
chr5	90511958	90513718	1761	*	622	-1.8638	8.03325	3.53847e-50	merged_common	137.315	499.78	Intron (ENSMUST00000202955.1/ENSMUST00000202955.1, intron 1 of 1)	5	90507431	90508852	1422	1	11576	ENSMUST00000202209.1	4527	ENSMUSG00000054932	Afp	alpha fetoprotein
chr12	39038563	39040323	1761	*	1363	-1.4365	8.78017	6.00309e-50	merged_common	267.227	723.285	Distal Intergenic	12	38837398	38865716	28319	1	14009	ENSMUST00000161591.1	201165	ENSMUSG00000004151	Etv1	ets variant 1
chr1	171113589	171114681	1093	*	409	2.28777	7.43248	7.19318e-50	merged_common	381.718	78.1728	Promoter	1	171113918	171126829	12912	1	75472	ENSMUST00000129651.7	0	ENSMUSG00000026649	Cfap126	cilia and flagella associated protein 126
chr16	87634780	87636699	1920	*	1239	2.42349	7.26934	1.3819e-49	merged_common	357.323	66.6067	Distal Intergenic	16	87698945	87733346	34402	1	12013	ENSMUST00000026703.5	-62246	ENSMUSG00000025612	Bach1	BTB and CNC homology 1, basic leucine zipper transcription factor 1
chr1	64305067	64306273	1207	*	609	1.73518	8.20165	7.08203e-49	merged_common	537.172	161.351	Distal Intergenic	1	64079103	64122282	43180	2	93691	ENSMUST00000135075.1	-182785	ENSMUSG00000025959	Klf7	Kruppel-like factor 7 (ubiquitous)
chr15	69019287	69020719	1433	*	586	-2.01423	7.77564	7.76179e-49	merged_common	109.026	440.426	Intron (ENSMUST00000022954.6/13992, intron 4 of 8)	15	68930068	69024765	94698	1	13992	ENSMUST00000230073.1	89219	ENSMUSG00000022332	Khdrbs3	KH domain containing, RNA binding, signal transduction associated 3
chr4	13702702	13703655	954	*	462	-2.20967	7.49709	1.18039e-48	merged_common	83.9964	388.542	Distal Intergenic	4	13743436	13893649	150214	1	12395	ENSMUST00000006761.9	-39781	ENSMUSG00000006586	Runx1t1	RUNX1 translocation partner 1
chr6	129229612	129230861	1250	*	883	2.85973	6.73329	1.74023e-48	merged_common	286.652	39.4903	Intron (ENSMUST00000181238.1/76432, intron 1 of 2)	6	129212736	129233974	21239	2	76432	ENSMUST00000181517.7	3113	ENSMUSG00000097354	2310001H17Rik	RIKEN cDNA 2310001H17 gene
chr11	117989388	117990480	1093	*	735	3.55841	6.09615	2.23269e-48	merged_common	234.811	19.931	Intron (ENSMUST00000132676.7/74451, intron 1 of 9)	11	117986885	118024011	37127	1	74451	ENSMUST00000017859.9	2503	ENSMUSG00000017715	Pgs1	phosphatidylglycerophosphate synthase 1
chr11	117949175	117950148	974	*	387	2.79361	6.80309	2.23721e-48	merged_common	294.045	42.4086	Distal Intergenic	11	117966079	117969186	3108	2	12702	ENSMUST00000054002.3	19038	ENSMUSG00000053113	Socs3	suppressor of cytokine signaling 3
chr8	74826041	74827197	1157	*	472	-2.14757	7.56946	2.24888e-48	merged_common	90.2387	399.831	Intron (ENSMUST00000127757.7/ENSMUST00000127757.7, intron 4 of 9)	8	74873173	74893506	20334	1	71597	ENSMUST00000034034.9	-45976	ENSMUSG00000031621	Isx	intestine specific homeobox
chr10	116923684	116925054	1371	*	574	-2.07465	7.67573	2.32979e-48	merged_common	99.6229	419.654	Intron (ENSMUST00000020375.6/216363, intron 3 of 9)	10	116915940	116919933	3994	2	216363	ENSMUST00000219570.1	-3751	ENSMUSG00000064181	Rab3ip	RAB3A interacting protein
chr16	57301017	57302588	1572	*	915	-1.53962	8.52679	2.67227e-48	merged_common	216.314	628.862	3' UTR	16	57266139	57292865	26727	2	71027	ENSMUST00000119407.7	-8152	ENSMUSG00000022753	Tmem30c	transmembrane protein 30C
chr3	19953574	19954889	1316	*	530	2.1681	7.54028	3.54433e-48	merged_common	394.623	87.8049	Distal Intergenic	3	19957054	19993138	36085	1	12870	ENSMUST00000091309.11	-2165	ENSMUSG00000003617	Cp	ceruloplasmin
chr4	143288177	143289195	1019	*	494	3.2099	6.40085	3.64292e-48	ATAC_PL_unique	257.031	27.7786	Intron (ENSMUST00000030317.13/14726, intron 1 of 5)	4	143268346	143299463	31118	2	14726	ENSMUST00000119654.1	10268	ENSMUSG00000028583	Pdpn	podoplanin
chr4	63150866	63152035	1170	*	515	2.74457	6.8433	6.3789e-48	merged_common	297.261	44.3547	Exon (ENSMUST00000030041.4/11699, exon 3 of 10)	4	63143275	63154173	10899	2	11699	ENSMUST00000030041.4	2138	ENSMUSG00000028356	Ambp	alpha 1 microglobulin/bikunin precursor
chr17	63011428	63012902	1475	*	1008	-1.3332	8.92133	9.49733e-48	merged_common	305.437	769.581	Distal Intergenic	17	62604184	62881317	277134	2	13640	ENSMUST00000076840.11	-130111	ENSMUSG00000048915	Efna5	ephrin A5
chr17	35820730	35824937	4208	*	2567	1.68604	8.24369	1.52843e-47	merged_common	543.716	168.975	Promoter	17	35823230	35832791	9562	1	14251	ENSMUST00000001569.14	0	ENSMUSG00000059714	Flot1	flotillin 1
chr17	26534716	26536052	1337	*	686	1.90303	7.88585	3.05271e-47	merged_common	457.417	122.305	Distal Intergenic	17	26561489	26656931	95443	1	67458	ENSMUST00000167662.7	-25437	ENSMUSG00000001576	Ergic1	endoplasmic reticulum-golgi intermediate compartment (ERGIC) 1
chr4	119965950	119967407	1458	*	781	1.63662	8.31319	3.86638e-47	merged_common	560.861	180.378	Intron (ENSMUST00000143837.1/16656, intron 1 of 1)	4	120032766	120065063	32298	1	16656	ENSMUST00000227491.1	-65359	ENSMUSG00000028634	Hivep3	human immunodeficiency virus type I enhancer binding protein 3
chr18	4331697	4335421	3725	*	2146	2.35279	7.27567	4.90559e-47	merged_common	350.207	68.559	Promoter	18	4333845	4335048	1204	2	26410	ENSMUST00000173708.1	0	ENSMUSG00000024235	Map3k8	mitogen-activated protein kinase kinase kinase 8
chr8	126807252	126808023	772	*	271	2.91682	6.65111	5.13714e-47	merged_common	276.191	36.5728	Distal Intergenic	8	126839233	126851473	12241	1	414091	ENSMUST00000212914.1	-31210	NA	A630001O12Rik	RIKEN cDNA A630001O12 gene
chr1	164585669	164587369	1701	*	1097	-2.19181	7.46988	6.07969e-47	merged_common	82.9388	378.929	Distal Intergenic	1	164503309	164514882	11574	1	102635083	ENSMUST00000181831.2	82360	ENSMUSG00000097281	Gm26685	predicted gene, 26685
chr4	93550892	93552112	1221	*	336	-2.02321	7.69435	1.00654e-46	merged_common	102.732	417.593	Intron (ENSMUST00000137509.1/ENSMUST00000137509.1, intron 2 of 2)	4	93334138	93335511	1374	2	69136	ENSMUST00000066774.5	-215381	ENSMUSG00000054000	Tusc1	tumor suppressor candidate 1
chr18	69415383	69416479	1097	*	404	2.06756	7.6257	1.11825e-46	merged_common	404.355	96.4641	Promoter	18	69415897	69683439	267543	1	21413	ENSMUST00000202458.3	0	ENSMUSG00000053477	Tcf4	transcription factor 4
chr1	93070954	93072297	1344	*	679	1.70071	8.18477	1.21192e-46	merged_common	524.619	161.391	Intron (ENSMUST00000171796.7/16560, intron 10 of 47)	1	93066132	93068758	2627	2	16560	ENSMUST00000190249.1	-2196	ENSMUSG00000014602	Kif1a	kinesin family member 1A
chr5	53450510	53452333	1824	*	547	1.73474	8.13208	1.5361e-46	merged_common	511.805	153.779	Distal Intergenic	5	53466152	53649390	183239	1	19664	ENSMUST00000201991.3	-13819	ENSMUSG00000039191	Rbpj	recombination signal binding protein for immunoglobulin kappa J region
chr4	119124765	119126569	1805	*	935	2.69328	6.84924	2.19993e-46	merged_common	293.228	45.3365	Intron (ENSMUST00000030398.9/20525, intron 2 of 9)	4	119108914	119137330	28417	1	20525	ENSMUST00000174372.2	15851	ENSMUSG00000028645	Slc2a1	solute carrier family 2 (facilitated glucose transporter), member 1
chr16	38393997	38394894	898	*	451	2.69328	6.84924	2.19993e-46	merged_common	293.228	45.3365	Downstream (1-2kb)	16	38371998	38374137	2140	1	64082	ENSMUST00000146342.1	21999	ENSMUSG00000022803	Popdc2	popeye domain containing 2
chr7	19932967	19934128	1162	*	533	3.07194	6.4771	2.23546e-46	merged_common	258.33	30.7205	Distal Intergenic	7	19938182	19944898	6717	2	70080	ENSMUST00000208210.1	10770	ENSMUSG00000040498	Igsf23	immunoglobulin superfamily, member 23
chr3	150610231	150611826	1596	*	553	-1.74199	8.09836	8.0678e-46	merged_common	149.849	501.239	Intron (ENSMUST00000198573.1/ENSMUST00000198573.1, intron 2 of 2)	3	151023792	151023862	71	2	100628568	ENSMUST00000175089.1	412036	ENSMUSG00000092830	Mir3963	microRNA 3963
chr8	36164737	36165707	971	*	411	2.47878	7.07169	9.45973e-46	merged_common	317.603	56.9767	Distal Intergenic	8	36159479	36161588	2110	1	330738	ENSMUST00000211253.1	5258	ENSMUSG00000109704	Gm38414	predicted gene, 38414
chr17	15801057	15802028	972	*	381	2.17477	7.44608	1.15164e-45	merged_common	370.535	82.065	Downstream (1-2kb)	17	15820982	15824395	3414	2	68799	ENSMUST00000232592.1	22367	ENSMUSG00000048027	Rgmb	repulsive guidance molecule family member B
chr15	8801504	8802539	1036	*	400	-2.37143	7.19121	1.99774e-45	merged_common	64.2442	332.434	Distal Intergenic	15	8634124	8710764	76641	2	20512	ENSMUST00000005493.13	-90740	ENSMUSG00000005360	Slc1a3	solute carrier family 1 (glial high affinity glutamate transporter), member 3
chr8	64831371	64832635	1265	*	484	2.3368	7.22689	4.25917e-45	merged_common	336.693	66.648	Intron (ENSMUST00000034017.8/77113, intron 2 of 14)	8	64811767	64842197	30431	2	77113	ENSMUST00000209544.1	9562	ENSMUSG00000031605	Klhl2	kelch-like 2, Mayven
chr7	137487666	137489153	1488	*	758	-2.3895	7.15289	4.68531e-45	merged_common	62.1697	325.754	Distal Intergenic	7	137437689	137442169	4481	1	620016	ENSMUST00000211598.1	49977	ENSMUSG00000100863	Gm12669	glutaredoxin 3 pseudogene
chr18	56737111	56737869	759	*	486	2.33233	7.2247	7.10565e-45	merged_common	335.662	66.6501	Intron (ENSMUST00000025486.8/16906, intron 5 of 10)	18	56728441	56733456	5016	1	16906	ENSMUST00000128651.1	8670	ENSMUSG00000024590	Lmnb1	lamin B1
chr1	62283345	62284327	983	*	482	-1.66493	8.19485	8.3823e-45	merged_common	164.55	521.786	Intron (ENSMUST00000075374.9/72823, intron 16 of 22)	1	62131195	62136109	4915	2	105243940	ENSMUST00000127498.2	-147236	NA	Pard3bos2	par-3 family cell polarity regulator beta, opposite strand 2
chr7	125575502	125584575	9074	*	6069	2.47473	7.04514	1.17085e-44	merged_common	311.374	56.0163	3' UTR	7	125603429	125631506	28078	1	60504	ENSMUST00000206234.1	-18854	ENSMUSG00000030745	Il21r	interleukin 21 receptor
chr10	13832242	13833246	1005	*	736	1.9502	7.72988	1.47643e-44	merged_common	417.311	107.992	Intron (ENSMUST00000162610.7/66253, intron 1 of 5)	10	13653588	13844286	190699	2	66253	ENSMUST00000162174.7	11040	ENSMUSG00000019806	Aig1	androgen-induced 1
chr11	82100921	82102363	1443	*	745	1.59133	8.30605	2.20937e-44	merged_common	549.401	182.327	Promoter	11	82101845	82103400	1556	1	20293	ENSMUST00000000194.3	0	ENSMUSG00000035352	Ccl12	chemokine (C-C motif) ligand 12
chr6	38064592	38066736	2145	*	1013	-1.70362	8.10894	2.87178e-44	merged_common	152.973	498.258	Intron (ENSMUST00000114908.4/140494, intron 15 of 21)	6	38051281	38055153	3873	2	140494	ENSMUST00000135594.1	-9439	ENSMUSG00000038600	Atp6v0a4	ATPase, H+ transporting, lysosomal V0 subunit A4
chr11	9530515	9532632	2118	*	1333	-1.43238	8.59434	5.08089e-44	merged_common	235.266	634.964	Exon (ENSMUST00000042740.12/268379, exon 46 of 62)	11	9193451	9256178	62728	1	268379	ENSMUST00000151522.1	337064	ENSMUSG00000004668	Abca13	ATP-binding cassette, sub-family A (ABC1), member 13
chr8	117197618	117199181	1564	*	666	1.43726	8.57983	9.87009e-44	merged_common	629.673	232.518	Intron (ENSMUST00000064488.10/209239, intron 9 of 10)	8	117158137	117215997	57861	1	209239	ENSMUST00000162997.2	39481	ENSMUSG00000052557	Gan	giant axonal neuropathy
chr4	112243167	112244811	1645	*	458	-2.33344	7.1718	1.23117e-43	merged_common	64.2258	323.701	Intron (ENSMUST00000038455.11/195564, intron 2 of 7)	4	112232245	112300468	68224	1	195564	ENSMUST00000170945.1	10922	ENSMUSG00000070868	Skint3	selection and upkeep of intraepithelial T cells 3
chr6	149193220	149194026	807	*	493	2.21066	7.32227	2.13286e-43	merged_common	344.319	74.385	Distal Intergenic	6	149157147	149188712	31566	2	232566	ENSMUST00000111535.7	-4508	ENSMUSG00000068250	Amn1	antagonist of mitotic exit network 1
chr9	90242549	90243415	867	*	573	2.32901	7.1809	2.21043e-43	merged_common	325.25	64.7314	Intron (ENSMUST00000041767.13/67016, intron 2 of 12)	9	90241163	90255927	14765	2	67016	ENSMUST00000144646.2	12512	ENSMUSG00000037410	Tbc1d2b	TBC1 domain family, member 2B
chr7	90067446	90068691	1246	*	702	1.43334	8.57206	3.54119e-43	merged_common	625.441	231.584	Distal Intergenic	7	90029162	90049069	19908	1	319711	ENSMUST00000208266.1	38284	ENSMUSG00000097585	E230029C05Rik	RIKEN cDNA E230029C05 gene
chr2	118529011	118529868	858	*	490	2.51505	6.93518	4.20442e-43	merged_common	292.584	51.1852	3' UTR	2	118531974	118544587	12614	2	171543	ENSMUST00000143583.1	14719	ENSMUSG00000040093	Bmf	BCL2 modifying factor
chr17	51476888	51478306	1419	*	696	1.45813	8.51204	4.22287e-43	merged_common	605.132	220.246	Distal Intergenic	17	51425209	51435838	10630	2	328837	ENSMUST00000233466.1	-41050	ENSMUSG00000117204	C330011F03Rik	RIKEN cDNA C330011F03 gene
chr2	75685222	75686208	987	*	325	1.69154	8.08402	4.47882e-43	merged_common	487.68	150.984	Intron (ENSMUST00000102672.4/18024, intron 1 of 4)	2	75691052	75704489	13438	2	18024	ENSMUST00000152371.1	18281	ENSMUSG00000015839	Nfe2l2	nuclear factor, erythroid derived 2, like 2
chr10	126501053	126503626	2574	*	1481	-0.98134	9.65054	4.61465e-43	merged_common	571.999	1129.3	Distal Intergenic	10	126710282	126710391	110	2	102465224	ENSMUST00000184232.1	206765	ENSMUSG00000098756	Mir378d	microRNA 378d
chr12	86818868	86819745	878	*	451	2.62013	6.81342	4.67359e-43	merged_common	278.877	45.3602	Distal Intergenic	12	86880701	86884798	4098	2	238330	ENSMUST00000038422.7	65053	ENSMUSG00000034168	Irf2bpl	interferon regulatory factor 2 binding protein-like
chr18	60480810	60481678	869	*	362	1.73105	8.00977	4.98806e-43	merged_common	469.602	141.459	Intron (ENSMUST00000042710.6/106878, intron 1 of 1)	18	60474193	60501983	27791	2	106878	ENSMUST00000042710.6	20305	ENSMUSG00000038059	Smim3	small integral membrane protein 3
chr12	55485666	55489623	3958	*	3311	1.46036	8.50074	5.57892e-43	merged_common	600.875	218.359	3' UTR	12	55490407	55491810	1404	2	18035	ENSMUST00000219869.1	2187	ENSMUSG00000021025	Nfkbia	nuclear factor of kappa light polypeptide gene enhancer in B cells inhibitor, alpha
chr6	144817266	144818665	1400	*	947	-1.85625	7.80219	8.80196e-43	merged_common	117.3	424.704	Distal Intergenic	6	143843739	144781977	938239	2	20678	ENSMUST00000141102.7	-35289	ENSMUSG00000041540	Sox5	SRY (sex determining region Y)-box 5
chr3	121570023	121572171	2149	*	861	1.73752	7.99345	1.99066e-42	merged_common	465.362	139.555	Distal Intergenic	3	121459528	121532404	72877	2	213603	ENSMUST00000039197.8	-37619	ENSMUSG00000039865	Slc44a3	solute carrier family 44, member 3
chr13	107699972	107700990	1019	*	467	2.44604	6.98063	5.12087e-42	merged_common	294.812	54.102	Distal Intergenic	13	107687397	107692173	4777	1	72257	ENSMUST00000188490.1	12575	ENSMUSG00000102000	1700006H21Rik	RIKEN cDNA 1700006H21 gene
chr10	62542539	62544488	1950	*	1126	1.14675	9.15105	1.13994e-41	merged_common	845.948	382.065	Intron (ENSMUST00000159704.7/72320, intron 7 of 7)	10	62493833	62527451	33619	2	19073	ENSMUST00000160987.7	-15088	ENSMUSG00000020077	Srgn	serglycin
chr2	138245400	138246584	1185	*	690	-1.86966	7.74293	1.14794e-41	merged_common	112.058	409.511	Distal Intergenic	2	138256565	138287422	30858	1	228662	ENSMUST00000091556.11	-9981	ENSMUSG00000062098	Btbd3	BTB (POZ) domain containing 3
chr13	28544598	28546089	1492	*	829	-1.70436	8.0062	1.40083e-41	merged_common	142.421	464.128	Intron (ENSMUST00000148885.7/72518, intron 7 of 7)	13	28460034	28521108	61075	2	72518	ENSMUST00000134787.7	-23490	NA	2610307P16Rik	RIKEN cDNA 2610307P16 gene
chr15	49092790	49093775	986	*	456	-2.44405	6.97354	1.46274e-41	merged_common	53.8739	293.164	Distal Intergenic	15	47580722	48792063	1211342	2	239420	ENSMUST00000162830.7	-300727	ENSMUSG00000022311	Csmd3	CUB and Sushi multiple domains 3
chr5	136216591	136218604	2014	*	593	2.84186	6.5359	2.25494e-41	merged_common	248.453	34.6545	3' UTR	5	136178127	136198963	20837	2	66801	ENSMUST00000151786.7	-17628	ENSMUSG00000039737	Prkrip1	Prkr interacting protein 1 (IL11 inducible)
chr10	10184081	10185939	1859	*	525	-1.7062	7.99642	2.36566e-41	merged_common	141.369	461.287	Exon (ENSMUST00000208997.1/ENSMUST00000208997.1, exon 1 of 2)	10	10335709	10411744	76036	2	215772	ENSMUST00000148816.7	225805	ENSMUSG00000050994	Adgb	androglobin
chr1	136684877	136685992	1116	*	688	2.36327	7.06303	2.36981e-41	merged_common	303.313	58.949	Intron (ENSMUST00000180495.7/100503460, intron 4 of 4)	1	136683629	136690802	7174	1	100503460	ENSMUST00000180962.1	1248	ENSMUSG00000097113	Gm19705	predicted gene, 19705
chr2	148884716	148885298	583	*	209	-2.07579	7.4287	3.24663e-41	merged_common	83.912	353.752	Distal Intergenic	2	148872848	148875692	2845	2	13010	ENSMUST00000144845.1	-9024	ENSMUSG00000027447	Cst3	cystatin C
chr14	9555403	9556627	1225	*	593	-2.00868	7.51516	4.65029e-41	merged_common	91.191	366.965	Intron (ENSMUST00000161302.7/14198, intron 6 of 6)	14	9884195	9886768	2574	1	100042415	ENSMUST00000224435.1	-327568	ENSMUSG00000089686	Mnd1-ps	Mnd1 retrotransposed pseudogene
chr5	36538581	36539213	633	*	192	2.31402	7.10784	4.94926e-41	merged_common	307.587	61.8555	Intron (ENSMUST00000146430.7/100855, intron 3 of 13)	5	36490608	36531602	40995	2	100855	ENSMUST00000126077.7	-6979	ENSMUSG00000029192	Tbc1d14	TBC1 domain family, member 14
chr13	107619282	107620051	770	*	453	2.28927	7.13988	5.60172e-41	merged_common	311.808	63.7894	Distal Intergenic	13	107687397	107692162	4766	1	72257	ENSMUST00000188960.6	-67346	ENSMUSG00000102000	1700006H21Rik	RIKEN cDNA 1700006H21 gene
chrX	13606576	13607316	741	*	331	-3.26527	6.09707	7.71681e-41	ATAC_PP_unique	22.0764	212.262	Intron (ENSMUST00000156096.7/12361, intron 8 of 23)	20	13632089	13640856	8768	1	23890	ENSMUST00000041708.9	-24773	ENSMUSG00000040229	Gpr34	G protein-coupled receptor 34
chr8	11476406	11479824	3419	*	564	2.19587	7.25813	7.78435e-41	merged_common	327.662	71.516	Promoter	8	11477929	11480241	2313	1	102132	ENSMUST00000180408.1	0	ENSMUSG00000096957	E230013L22Rik	RIKEN cDNA E230013L22 gene
chr1	79824544	79825786	1243	*	768	-2.12088	7.359	8.61752e-41	merged_common	78.7146	342.377	Intron (ENSMUST00000027467.10/20720, intron 1 of 8)	1	79796845	79821322	24478	2	20720	ENSMUST00000189793.6	-3222	ENSMUSG00000026249	Serpine2	serine (or cysteine) peptidase inhibitor, clade E, member 2
chr7	120850889	120852849	1961	*	855	-1.17498	9.0386	1.80088e-40	merged_common	349.975	790.209	Promoter	7	120851189	120880354	29166	1	13631	ENSMUST00000143322.8	0	ENSMUSG00000035064	Eef2k	eukaryotic elongation factor-2 kinase
chr2	167777153	167778411	1259	*	372	1.93472	7.58892	3.75063e-40	merged_common	376.441	98.4664	Exon (ENSMUST00000139927.1/ENSMUST00000139927.1, exon 1 of 3)	2	167691181	167697801	6621	1	329562	ENSMUST00000130679.1	85972	ENSMUSG00000006462	A530013C23Rik	RIKEN cDNA A530013C23 gene
chr7	35163350	35164367	1018	*	497	1.80584	7.79269	3.92188e-40	merged_common	414.61	118.584	Distal Intergenic	7	35186385	35195449	9065	1	53896	ENSMUST00000135452.7	-22018	ENSMUSG00000030495	Slc7a10	solute carrier family 7 (cationic amino acid transporter, y+ system), member 10
chr11	82103621	82107001	3381	*	766	4.51717	5.08245	4.60263e-40	ATAC_PL_unique	162.133	7.08057	Distal Intergenic	11	82101852	82103367	1516	1	20293	ENSMUST00000124916.1	1769	ENSMUSG00000035352	Ccl12	chemokine (C-C motif) ligand 12
chr14	100223190	100225257	2068	*	1212	-1.23702	8.87221	5.33702e-40	merged_common	305.219	719.435	Intron (ENSMUST00000140320.8/ENSMUST00000140320.8, intron 2 of 4)	14	100022832	100284484	261653	2	16597	ENSMUST00000226774.1	59227	ENSMUSG00000072294	Klf12	Kruppel-like factor 12
chr2	73037252	73038780	1529	*	170	2.1932	7.21757	1.44006e-39	merged_common	318.284	69.5978	Distal Intergenic	2	72987241	72988607	1367	1	100503849	ENSMUST00000137941.1	50011	NA	Sp3os	trans-acting transcription factor 3, opposite strand
chr16	36720045	36720976	932	*	464	2.04048	7.41357	1.49016e-39	merged_common	345.804	84.059	Intron (ENSMUST00000023617.12/106347, intron 5 of 7)	16	36715538	36722260	6723	1	106347	ENSMUST00000128084.1	4507	ENSMUSG00000022900	Ildr1	immunoglobulin-like domain containing receptor 1
chr16	15947863	15948926	1064	*	502	2.43625	6.8966	1.9855e-39	merged_common	277.189	51.2143	Intron (ENSMUST00000040248.8/224008, intron 10 of 19)	16	15887286	15891031	3746	1	12609	ENSMUST00000096232.5	60577	ENSMUSG00000071637	Cebpd	CCAAT/enhancer binding protein (C/EBP), delta
chr12	108639068	108639570	503	*	223	2.92807	6.36034	2.77744e-39	merged_common	226.658	29.7807	Intron (ENSMUST00000077735.12/14026, intron 1 of 12)	12	108635753	108688513	52761	1	14026	ENSMUST00000172409.1	3315	ENSMUSG00000021262	Evl	Ena-vasodilator stimulated phosphoprotein
chr9	7139705	7140949	1245	*	802	-1.86306	7.6561	5.89058e-39	merged_common	105.754	384.711	Exon (ENSMUST00000048417.12/110350, exon 26 of 89)	9	7083184	7117588	34405	2	110350	ENSMUST00000216097.1	-22117	ENSMUSG00000047193	Dync2h1	dynein cytoplasmic 2 heavy chain 1
chr17	37491124	37492742	1619	*	1002	-1.52008	8.23669	6.09374e-39	merged_common	178.113	510.841	Promoter	17	37492468	37500207	7740	1	258325	ENSMUST00000168318.2	0	ENSMUSG00000090894	Olfr110	olfactory receptor 110
chr3	83884912	83885583	672	*	346	3.31971	5.97928	6.42192e-39	ATAC_PL_unique	199.347	19.9653	Distal Intergenic	3	83900332	83907579	7248	2	229473	ENSMUST00000199411.4	21996	ENSMUSG00000033767	Tmem131l	transmembrane 131 like
chr9	83113529	83114624	1096	*	651	-1.53931	8.20304	7.84309e-39	merged_common	172.851	502.401	Promoter	9	83110181	83112568	2388	2	94353	ENSMUST00000191105.1	-961	ENSMUSG00000066456	Hmgn3	high mobility group nucleosomal binding domain 3
chr10	60361598	60362887	1290	*	845	-1.89309	7.58298	1.40487e-38	merged_common	99.4869	369.524	Intron (ENSMUST00000020301.13/74048, intron 3 of 6)	10	60349323	60369293	19971	1	74048	ENSMUST00000105459.1	12275	ENSMUSG00000020101	Vsir	V-set immunoregulatory receptor
chr15	27596481	27597578	1098	*	470	-1.89681	7.58488	1.40487e-38	merged_common	99.4897	370.489	Intron (ENSMUST00000228179.1/432940, intron 1 of 1)	15	27542635	27608861	66227	2	432940	ENSMUST00000228179.1	11283	ENSMUSG00000046034	Otulin	OTU deubiquitinase with linear linkage specificity
chr1	171558430	171559478	1049	*	709	1.9893	7.45274	1.43141e-38	merged_common	349.074	87.9182	Promoter	1	171559193	171585318	26126	1	18106	ENSMUST00000004829.12	0	ENSMUSG00000004709	Cd244a	CD244 molecule A
chr2	167687846	167690243	2398	*	1164	1.55765	8.13988	2.45021e-38	merged_common	483.947	164.399	Promoter	2	167688915	167690418	1504	1	12608	ENSMUST00000070642.3	0	ENSMUSG00000056501	Cebpb	CCAAT/enhancer binding protein (C/EBP), beta
chr8	128035343	128036449	1107	*	584	-1.61246	8.04232	3.47957e-38	merged_common	150.758	460.977	Distal Intergenic	8	128278148	128278225	78	2	102465212	ENSMUST00000184910.1	241776	ENSMUSG00000099326	Mir21c	microRNA 21c
chr2	85193787	85195556	1770	*	966	-1.86305	7.6272	4.05596e-38	merged_common	103.657	377.08	Intron (ENSMUST00000099930.8/241528, intron 1 of 3)	2	85162334	85196699	34366	2	241528	ENSMUST00000099930.8	1143	ENSMUSG00000075224	Lrrc55	leucine rich repeat containing 55
chr3	154584144	154585011	868	*	415	-1.8704	7.61629	4.32538e-38	merged_common	102.614	375.193	Intron (ENSMUST00000052774.7/209584, intron 5 of 5)	3	154579845	154594534	14690	2	209584	ENSMUST00000148680.2	9523	ENSMUSG00000047583	Tyw3	tRNA-yW synthesizing protein 3 homolog (S. cerevisiae)
chr8	8952067	8952724	658	*	317	-2.06323	7.32955	4.53353e-38	merged_common	78.6805	328.822	Distal Intergenic	8	9125412	9132288	6877	2	71249	ENSMUST00000208031.1	179564	ENSMUSG00000108848	4933430N04Rik	RIKEN cDNA 4933430N04 gene
chr5	53402203	53403416	1214	*	802	1.73819	7.80514	5.76235e-38	merged_common	408.512	122.45	Distal Intergenic	5	53466152	53649390	183239	1	19664	ENSMUST00000201991.3	-62736	ENSMUSG00000039191	Rbpj	recombination signal binding protein for immunoglobulin kappa J region
chr7	125503371	125504195	825	*	551	2.9961	6.2448	5.90405e-38	ATAC_PL_unique	214.205	26.8481	Distal Intergenic	7	125467640	125491596	23957	2	67711	ENSMUST00000033006.13	-11775	ENSMUSG00000030750	Nsmce1	NSE1 homolog, SMC5-SMC6 complex component
chr10	117872421	117873456	1036	*	329	2.69599	6.54299	1.47535e-37	merged_common	237.369	36.6311	Distal Intergenic	10	117813871	117846035	32165	2	215449	ENSMUST00000064667.8	-26386	ENSMUSG00000052681	Rap1b	RAS related protein 1b
chr17	29397656	29398719	1064	*	673	3.44173	5.80942	1.6987e-37	ATAC_PL_unique	184.859	17.0129	Distal Intergenic	17	29376501	29378452	1952	1	26382	ENSMUST00000144616.1	21155	ENSMUSG00000024013	Fgd2	FYVE, RhoGEF and PH domain containing 2
chr11	69408282	69412255	3974	*	1402	1.83709	7.62265	2.4406e-37	merged_common	372.525	104.265	5' UTR	11	69398508	69413675	15168	2	216850	ENSMUST00000094077.4	1420	ENSMUSG00000018476	Kdm6b	KDM1 lysine (K)-specific demethylase 6B
chr18	79326786	79328318	1533	*	781	-1.44144	8.32763	2.90406e-37	merged_common	194.943	529.45	Distal Intergenic	18	78750380	79109391	359012	2	240427	ENSMUST00000025430.10	-217395	ENSMUSG00000024548	Setbp1	SET binding protein 1
chr6	26205019	26206626	1608	*	1133	-1.53282	8.13661	3.5383e-37	merged_common	165.444	478.714	Distal Intergenic	6	25954485	25958159	3675	1	626904	ENSMUST00000201080.1	250534	ENSMUSG00000106799	Gm20756	predicted gene, 20756
chr15	41611914	41613274	1361	*	507	1.45282	8.2968	4.02837e-37	merged_common	520.304	190.07	Intron (ENSMUST00000090096.10/170719, intron 2 of 15)	15	41710604	41820380	109777	1	170719	ENSMUST00000229769.1	-97330	ENSMUSG00000022307	Oxr1	oxidation resistance 1
chr2	63052561	63053493	933	*	512	-2.04206	7.31874	4.91687e-37	merged_common	78.6683	323.982	Intron (ENSMUST00000075052.9/170738, intron 2 of 15)	2	62786367	63184170	397804	2	170738	ENSMUST00000112452.1	130677	ENSMUSG00000059742	Kcnh7	potassium voltage-gated channel, subfamily H (eag-related), member 7
chr1	189184935	189186032	1098	*	488	-2.17151	7.13515	4.92741e-37	merged_common	66.2292	298.359	Distal Intergenic	1	189210025	189215217	5193	2	16526	ENSMUST00000193686.1	29185	ENSMUSG00000037624	Kcnk2	potassium channel, subfamily K, member 2
chr5	88507910	88510105	2196	*	870	-1.08934	9.11757	5.91458e-37	merged_common	380.803	810.259	Distal Intergenic	5	88519809	88526640	6832	2	16069	ENSMUST00000164073.2	16535	ENSMUSG00000067149	Jchain	immunoglobulin joining chain
chr4	40821110	40822123	1014	*	536	2.67706	6.53372	7.62485e-37	merged_common	234.306	36.636	Intron (ENSMUST00000030121.12/14595, intron 2 of 5)	4	40850056	40850138	83	2	100628614	ENSMUST00000177794.1	28015	ENSMUSG00000096377	Mir5123	microRNA 5123
chr10	95299788	95300781	994	*	651	1.79216	7.67773	9.19571e-37	merged_common	381.043	110.022	Intron (ENSMUST00000220279.1/12905, intron 1 of 1)	10	95174746	95322965	148220	2	12905	ENSMUST00000220279.1	22184	ENSMUSG00000045867	Cradd	CASP2 and RIPK1 domain containing adaptor with death domain
chr10	128778904	128780762	1859	*	1444	2.35437	6.88342	1.12145e-36	merged_common	266.983	52.2093	Distal Intergenic	10	128790910	128799785	8876	1	58223	ENSMUST00000219404.1	-10148	ENSMUSG00000025355	Mmp19	matrix metallopeptidase 19
chr7	89215341	89216983	1643	*	934	-1.5377	8.1112	1.15173e-36	merged_common	162.281	471.152	Exon (ENSMUST00000208963.1/ENSMUST00000208963.1, exon 1 of 1)	7	89154127	89159617	5491	2	72759	ENSMUST00000136267.7	-55724	ENSMUSG00000039428	Tmem135	transmembrane protein 135
chr9	21287372	21288423	1052	*	723	1.10699	9.05931	1.21224e-36	merged_common	782.966	363.501	Promoter	9	21273457	21287969	14513	2	215194	ENSMUST00000038671.9	0	ENSMUSG00000035047	Kri1	KRI1 homolog
chr11	83540793	83541702	910	*	395	2.44934	6.76019	1.75927e-36	merged_common	253.328	46.3829	Distal Intergenic	11	83525778	83530518	4741	2	20304	ENSMUST00000035938.2	-10275	ENSMUSG00000035042	Ccl5	chemokine (C-C motif) ligand 5
chr2	103282017	103283051	1035	*	486	-1.99849	7.35282	1.88283e-36	merged_common	81.7743	326.755	Promoter	2	103266511	103283760	17250	2	13661	ENSMUST00000111174.7	709	ENSMUSG00000012350	Ehf	ets homologous factor
chr7	55767806	55770659	2854	*	363	-1.68122	7.84855	2.08555e-36	merged_common	128.706	412.76	Promoter	7	55768178	55772523	4346	1	233274	ENSMUST00000172988.7	0	ENSMUSG00000051504	Siglech	sialic acid binding Ig-like lectin H
chr5	90412370	90415487	3118	*	1079	-1.60988	7.95794	3.9766e-36	merged_common	142.321	434.4	Distal Intergenic	5	90367204	90368487	1284	1	791294	ENSMUST00000068250.3	45166	ENSMUSG00000054945	Gm9958	predicted gene 9958
chr1	174434189	174434893	705	*	160	-2.25893	6.98622	4.55034e-36	merged_common	57.9507	277.373	3' UTR	1	174430430	174431384	955	1	258756	ENSMUST00000053178.4	3759	ENSMUSG00000051509	Olfr414	olfactory receptor 414
chr5	9570603	9571571	969	*	540	-2.73268	6.42265	5.17867e-36	merged_common	33.2737	221.167	Exon (ENSMUST00000004076.4/108069, exon 3 of 6)	5	9417615	9422330	4716	1	231014	ENSMUST00000142202.1	152988	ENSMUSG00000056004	9330182L06Rik	RIKEN cDNA 9330182L06 gene
chr3	21919786	21921546	1761	*	380	2.14643	7.13369	5.83258e-36	merged_common	295.478	66.7398	Distal Intergenic	3	22076652	22216594	139943	1	81004	ENSMUST00000193734.5	-155106	ENSMUSG00000027630	Tbl1xr1	transducin (beta)-like 1X-linked receptor 1
chr14	63131691	63132766	1076	*	680	2.30765	6.91288	6.04498e-36	merged_common	268.114	54.1562	Intron (ENSMUST00000006235.8/13030, intron 1 of 9)	14	63135518	63141863	6346	1	13030	ENSMUST00000225540.1	-2752	ENSMUSG00000021939	Ctsb	cathepsin B
chr2	11529673	11530749	1077	*	451	2.97127	6.17933	7.4577e-36	merged_common	202.948	25.8787	Exon (ENSMUST00000192087.1/ENSMUST00000192087.1, exon 2 of 3)	2	11471826	11553922	82097	2	170768	ENSMUST00000195779.5	23173	ENSMUSG00000026773	Pfkfb3	6-phosphofructo-2-kinase/fructose-2,6-biphosphatase 3
chr13	5887546	5890295	2750	*	938	-0.88906	9.64636	8.57e-36	merged_common	588.88	1090.59	Intron (ENSMUST00000221487.1/ENSMUST00000221487.1, intron 1 of 1)	13	5864678	5866770	2093	1	23849	ENSMUST00000221734.1	22868	ENSMUSG00000000078	Klf6	Kruppel-like factor 6
chr2	153083772	153085103	1332	*	611	1.27922	8.59836	1.25188e-35	merged_common	603.818	248.784	Distal Intergenic	2	153066002	153081735	15734	1	228788	ENSMUST00000109800.1	17770	ENSMUSG00000027474	Ccm2l	cerebral cavernous malformation 2-like
chr15	24989768	24990897	1130	*	433	-1.69258	7.78185	1.5163e-35	merged_common	122.409	395.666	Intron (ENSMUST00000180955.1/ENSMUST00000180955.1, intron 1 of 3)	15	25364857	25413698	48842	2	70350	ENSMUST00000228597.1	422801	ENSMUSG00000045763	Basp1	brain abundant, membrane attached signal protein 1
chr1	52499571	52501091	1521	*	888	1.12898	8.95018	1.56698e-35	merged_common	731.478	334.46	Promoter	1	52457294	52500300	43007	2	17936	ENSMUST00000186764.6	0	ENSMUSG00000002881	Nab1	Ngfi-A binding protein 1
chr16	92696477	92699251	2775	*	940	1.56559	8.00413	1.96871e-35	merged_common	441.701	149.224	Promoter	16	92603656	92697328	93673	2	12394	ENSMUST00000113956.9	0	ENSMUSG00000022952	Runx1	runt related transcription factor 1
chr11	50133821	50134982	1162	*	518	2.32037	6.86677	2.44486e-35	merged_common	260.828	52.222	Promoter	11	50135427	50140568	5142	1	76795	ENSMUST00000126758.1	-445	ENSMUSG00000036644	Tbc1d9b	TBC1 domain family, member 9B
chr5	150242478	150243481	1004	*	602	-2.24951	6.95532	3.25068e-35	merged_common	56.9082	270.611	Intron (ENSMUST00000200960.3/320365, intron 2 of 4)	5	150259767	150497753	237987	1	320365	ENSMUST00000087204.8	-16286	ENSMUSG00000056602	Fry	FRY microtubule binding protein
chr5	32134177	32136925	2749	*	1577	1.47846	8.15811	3.86584e-35	merged_common	476.833	171.122	Promoter	5	32135801	32157842	22042	1	14284	ENSMUST00000031017.10	0	ENSMUSG00000029135	Fosl2	fos-like antigen 2
chr4	59365875	59367558	1684	*	506	1.94597	7.3673	4.57519e-35	merged_common	324.098	84.1164	Exon (ENSMUST00000040166.13/634731, exon 10 of 17)	4	59331957	59362982	31026	2	634731	ENSMUST00000136077.1	-2893	ENSMUSG00000038578	Susd1	sushi domain containing 1
chr12	80863211	80864154	944	*	318	3.20425	5.92275	4.75662e-35	merged_common	184.168	19.9819	Intron (ENSMUST00000220238.1/217684, intron 3 of 6)	12	80923432	80924449	1018	2	67340	ENSMUST00000190431.1	60295	ENSMUSG00000101912	1700052I22Rik	RIKEN cDNA 1700052I22 gene
chr15	76783324	76784306	983	*	599	2.74925	6.36396	6.60273e-35	ATAC_PL_unique	213.573	31.7643	Intron (ENSMUST00000036176.14/223666, intron 1 of 11)	15	76751677	76794825	43149	2	223666	ENSMUST00000176855.7	10519	ENSMUSG00000033697	Arhgap39	Rho GTPase activating protein 39
chr2	148876806	148878139	1334	*	795	-1.28385	8.54433	8.73424e-35	merged_common	239.255	582.557	Distal Intergenic	2	148872848	148875692	2845	2	13010	ENSMUST00000144845.1	-1114	ENSMUSG00000027447	Cst3	cystatin C
chr6	128648288	128649252	965	*	440	-1.80927	7.55528	1.06608e-34	merged_common	100.472	352.118	Exon (ENSMUST00000203669.1/ENSMUST00000203669.1, exon 1 of 1)	6	128662385	128677374	14990	1	94071	ENSMUST00000032518.6	-13133	ENSMUSG00000030364	Clec2h	C-type lectin domain family 2, member h
chr4	88449691	88450798	1108	*	599	-1.64265	7.84059	1.22847e-34	merged_common	129.721	405.038	Distal Intergenic	4	88410341	88438928	28588	2	66775	ENSMUST00000151280.7	-10763	ENSMUSG00000028497	Hacd4	3-hydroxyacyl-CoA dehydratase 4
chr17	64201384	64202652	1269	*	456	-1.83141	7.52077	1.32781e-34	merged_common	97.347	346.443	Distal Intergenic	17	64281006	64313031	32026	2	224938	ENSMUST00000024888.14	110379	ENSMUSG00000024083	Pja2	praja ring finger ubiquitin ligase 2
chr2	101732375	101733647	1273	*	560	1.52873	8.04008	1.50404e-34	merged_common	447.097	154.956	Intron (ENSMUST00000171088.7/72446, intron 7 of 8)	2	101684215	101690085	5871	1	22034	ENSMUST00000144063.1	48160	ENSMUSG00000027164	Traf6	TNF receptor-associated factor 6
chr10	99710927	99712684	1758	*	804	-1.36946	8.34474	1.81498e-34	merged_common	202.252	522.566	Distal Intergenic	10	99759506	99830562	71057	1	102638712	ENSMUST00000217945.1	-46822	NA	Gm35206	predicted gene, 35206
chr1	33510291	33511953	1663	*	1187	-1.75115	7.64125	2.91118e-34	merged_common	108.811	366.286	Intron (ENSMUST00000027312.10/19076, intron 10 of 13)	1	33478942	33622142	143201	2	19076	ENSMUST00000189552.1	110189	ENSMUSG00000026134	Prim2	DNA primase, p58 subunit
chr2	148870078	148871556	1479	*	766	-3.22777	5.86183	3.28444e-34	ATAC_PP_unique	19.0002	177.998	Downstream (<1kb)	2	148872472	148875451	2980	2	13010	ENSMUST00000149691.1	3895	ENSMUSG00000027447	Cst3	cystatin C
chr18	34859447	34861797	2351	*	1415	1.0677	9.04746	3.53496e-34	merged_common	766.058	365.47	Promoter	18	34859823	34864984	5162	1	13653	ENSMUST00000064795.5	0	ENSMUSG00000038418	Egr1	early growth response 1
chr1	180402356	180404977	2622	*	1640	1.24764	8.59916	4.84979e-34	merged_common	597.577	251.661	Intron (ENSMUST00000070181.6/320404, intron 2 of 7)	1	180437882	180462612	24731	2	381310	ENSMUST00000210737.1	57635	ENSMUSG00000053963	Stum	mechanosensory transduction mediator
chrX	96712505	96714785	2281	*	897	-1.26409	8.547	7.24307e-34	merged_common	241.345	579.653	Promoter	20	96713441	96716520	3080	1	76206	ENSMUST00000139205.7	0	ENSMUSG00000031210	Gpr165	G protein-coupled receptor 165
chr5	3497470	3498437	968	*	357	2.13763	7.04373	7.43692e-34	merged_common	276.77	62.8968	Intron (ENSMUST00000165117.7/12571, intron 5 of 7)	5	3543833	3570238	26406	1	68152	ENSMUST00000197082.4	-45396	ENSMUSG00000058503	Fam133b	family with sequence similarity 133, member B
chr2	103605649	103606856	1208	*	424	1.98286	7.24743	1.01472e-33	merged_common	302.095	76.4264	Intron (ENSMUST00000076212.3/99382, intron 1 of 16)	2	103566310	103718423	152114	1	99382	ENSMUST00000076212.3	39339	ENSMUSG00000032724	Abtb2	ankyrin repeat and BTB (POZ) domain containing 2
chr11	4239809	4240905	1097	*	504	2.21017	6.94017	1.07874e-33	merged_common	264.158	57.0868	3' UTR	11	4236420	4241026	4607	1	18413	ENSMUST00000075221.2	3389	ENSMUSG00000058755	Osm	oncostatin M
chr3	9724785	9726389	1605	*	612	2.05985	7.15228	1.17371e-33	merged_common	290.462	69.6647	Intron (ENSMUST00000161949.7/94212, intron 3 of 8)	3	9692767	9705002	12236	2	94212	ENSMUST00000159825.1	-19783	ENSMUSG00000027508	Pag1	phosphoprotein associated with glycosphingolipid microdomains 1
chr18	57799947	57800862	916	*	389	-2.1581	7.01032	1.18472e-33	merged_common	61.0225	272.36	Distal Intergenic	18	57878678	57946821	68144	1	20496	ENSMUST00000115366.2	-77816	ENSMUSG00000024597	Slc12a2	solute carrier family 12, member 2
chr11	45545793	45546728	936	*	408	-1.87491	7.41332	1.36469e-33	merged_common	89.0081	326.463	Distal Intergenic	11	45808087	45841171	33085	1	100009664	ENSMUST00000137002.1	-261359	NA	F630206G17Rik	RIKEN cDNA F630206G17 gene
chr13	43777078	43778806	1729	*	1334	1.94668	7.30036	1.39063e-33	merged_common	309.479	80.2828	Distal Intergenic	13	43784775	43803132	18358	1	12522	ENSMUST00000015540.3	-5969	ENSMUSG00000015396	Cd83	CD83 antigen
chr3	51195188	51196155	968	*	360	2.27378	6.84396	1.43676e-33	merged_common	252.624	52.2395	Distal Intergenic	3	51224447	51251644	27198	1	12457	ENSMUST00000023849.14	-28292	ENSMUSG00000023087	Noct	nocturnin
chr17	78915960	78918550	2591	*	1943	-0.95157	9.35401	1.65344e-33	merged_common	470.557	910.046	Promoter	17	78916500	78920306	3807	1	68554	ENSMUST00000180077.6	0	ENSMUSG00000062691	Cebpzos	CCAAT/enhancer binding protein (C/EBP), zeta, opposite strand
chr5	135702423	135703286	864	*	400	2.92865	6.10305	2.93372e-33	ATAC_PL_unique	189.674	24.9112	Intron (ENSMUST00000153500.7/18984, intron 1 of 7)	5	135716005	135731878	15874	1	18984	ENSMUST00000147515.1	-12719	ENSMUSG00000005514	Por	P450 (cytochrome) oxidoreductase
chr10	37134244	37142289	8046	*	6857	-0.90994	9.45604	4.05879e-33	merged_common	512.38	962.745	Promoter	10	37133375	37138920	5546	2	17118	ENSMUST00000092584.5	0	ENSMUSG00000069662	Marcks	myristoylated alanine rich protein kinase C substrate
chr9	44570775	44571604	830	*	363	2.01171	7.18718	4.55326e-33	merged_common	292.651	72.5712	Distal Intergenic	9	44511787	44561877	50091	2	12145	ENSMUST00000215293.1	-8898	ENSMUSG00000047880	Cxcr5	chemokine (C-X-C motif) receptor 5
chr3	69446599	69447823	1225	*	479	-1.8579	7.40463	5.28167e-33	merged_common	88.9967	322.595	Intron (ENSMUST00000029355.8/242083, intron 1 of 3)	3	69542432	69552918	10487	1	242083	ENSMUST00000134037.2	-94609	ENSMUSG00000027784	Ppm1l	protein phosphatase 1 (formerly 2C)-like
chr7	113780098	113780823	726	*	397	3.75725	5.34892	5.69343e-33	ATAC_PL_unique	149.868	11.0831	Intron (ENSMUST00000046687.15/233744, intron 1 of 15)	7	113766174	113932081	165908	1	233744	ENSMUST00000084696.5	13924	ENSMUSG00000038156	Spon1	spondin 1, (f-spondin) extracellular matrix protein
chr2	165855156	165856611	1456	*	972	2.21367	6.89232	7.41394e-33	merged_common	255.85	55.1575	Intron (ENSMUST00000109266.10/228880, intron 1 of 21)	2	165784152	165858173	74022	2	228880	ENSMUST00000109266.10	1562	ENSMUSG00000039671	Zmynd8	zinc finger, MYND-type containing 8
chr9	35123623	35124667	1045	*	577	2.40029	6.64299	9.42247e-33	merged_common	229.625	43.497	3' UTR	9	35054063	35119268	65206	2	20443	ENSMUST00000215089.1	-4355	ENSMUSG00000032038	St3gal4	ST3 beta-galactoside alpha-2,3-sialyltransferase 4
chr5	32103960	32104782	823	*	324	2.60875	6.42176	9.46505e-33	merged_common	211.738	34.7125	Distal Intergenic	5	32079697	32084746	5050	1	107976	ENSMUST00000202087.1	24263	ENSMUSG00000052139	Babam2	BRISC and BRCA1 A complex member 2
chr10	127664838	127669347	4510	*	3537	1.57973	7.85608	1.05664e-32	merged_common	400.58	134.012	Promoter	10	127664925	127665481	557	2	17937	ENSMUST00000128780.1	0	ENSMUSG00000025402	Nab2	Ngfi-A binding protein 2
chr13	107607160	107608065	906	*	376	1.52501	7.94708	1.31195e-32	merged_common	418.645	145.47	Intron (ENSMUST00000224826.1/ENSMUST00000224826.1, intron 2 of 2)	13	107687397	107692162	4766	1	72257	ENSMUST00000188960.6	-79332	ENSMUSG00000102000	1700006H21Rik	RIKEN cDNA 1700006H21 gene
chr2	171829693	171831039	1347	*	897	-1.57512	7.86345	1.40103e-32	merged_common	134.913	401.988	Distal Intergenic	2	171958188	171962131	3944	2	75655	ENSMUST00000151904.1	131092	ENSMUSG00000086823	1700028P15Rik	RIKEN cDNA 1700028P15 gene
chr5	43081586	43082910	1325	*	426	1.51563	7.95187	2.53854e-32	merged_common	418.674	146.429	Distal Intergenic	5	43233170	43289724	56555	1	231207	ENSMUST00000169035.7	-150260	ENSMUSG00000039782	Cpeb2	cytoplasmic polyadenylation element binding protein 2
chr10	80070496	80071925	1430	*	924	1.74547	7.55113	2.69457e-32	merged_common	343.428	102.423	3' UTR	10	80071283	80075400	4118	2	216161	ENSMUST00000218310.1	3475	ENSMUSG00000035673	Sbno2	strawberry notch 2
chr4	35241445	35242396	952	*	465	-1.83247	7.40849	2.96292e-32	merged_common	90.0251	320.621	Intron (ENSMUST00000146909.1/ENSMUST00000146909.1, intron 1 of 1)	4	35212423	35226175	13753	2	73205	ENSMUST00000156472.1	-15270	ENSMUSG00000028300	C9orf72	C9orf72, member of C9orf72-SMCR8 complex
chr11	59902109	59902911	803	*	557	3.33174	5.66993	3.16271e-32	ATAC_PL_unique	161.546	16.0451	Intron (ENSMUST00000143391.1/ENSMUST00000143391.1, intron 1 of 3)	11	59921499	59921889	391	1	69854	ENSMUST00000130205.1	-18588	ENSMUSG00000085551	1810063I02Rik	RIKEN cDNA 1810063I02 gene
chr2	79653001	79654231	1231	*	676	-0.80892	9.75142	3.33317e-32	merged_common	651.201	1140.84	Intron (ENSMUST00000111785.8/70599, intron 9 of 17)	2	79639182	79672966	33785	1	70599	ENSMUST00000133266.1	13819	ENSMUSG00000027007	Itprid2	ITPR interacting domain containing 2
chr12	35291874	35292601	728	*	323	2.29933	6.74561	3.97728e-32	merged_common	238.075	48.3668	Distal Intergenic	12	35194811	35194897	87	2	751520	ENSMUST00000102298.1	-96977	ENSMUSG00000076253	Mir680-3	microRNA 680-3
chr4	33581623	33582437	815	*	510	2.75754	6.22895	4.52962e-32	merged_common	195.053	28.8436	Distal Intergenic	4	33438081	33438209	129	1	102465904	ENSMUST00000183962.1	143542	ENSMUSG00000098310	Mir8118	microRNA 8118
chr1	161734481	161735771	1291	*	527	1.56833	7.85049	5.31588e-32	merged_common	397.457	134.022	Distal Intergenic	1	161780689	161788495	7807	2	14103	ENSMUST00000000834.3	52724	ENSMUSG00000000817	Fasl	Fas ligand (TNF superfamily, member 6)
chr17	79179043	79180089	1047	*	554	2.64189	6.35487	5.85862e-32	merged_common	204.48	32.7614	Distal Intergenic	17	79077002	79081853	4852	1	70536	ENSMUST00000233899.1	102041	ENSMUSG00000024084	Qpct	glutaminyl-peptide cyclotransferase (glutaminyl cyclase)
chr7	31148125	31152312	4188	*	3260	1.18691	8.64297	6.55832e-32	merged_common	603.172	264.939	Promoter	7	31130127	31151012	20886	2	52857	ENSMUST00000185985.6	0	ENSMUSG00000001248	Gramd1a	GRAM domain containing 1A
chr7	55774705	55781023	6319	*	4842	-2.56118	6.42176	8.18538e-32	merged_common	35.2896	208.276	3' UTR	7	55768261	55778925	10665	1	233274	ENSMUST00000154933.1	6444	ENSMUSG00000051504	Siglech	sialic acid binding Ig-like lectin H
chrX	13574004	13575312	1309	*	1087	-2.21289	6.85546	8.66435e-32	merged_common	53.7806	249.329	Intron (ENSMUST00000156096.7/12361, intron 10 of 23)	20	13533340	13559331	25992	2	12361	ENSMUST00000139735.2	-14673	ENSMUSG00000031012	Cask	calcium/calmodulin-dependent serine protein kinase (MAGUK family)
chr1	170477942	170479121	1180	*	486	-1.86603	7.33941	1.02189e-31	merged_common	84.8237	309.206	Intron (ENSMUST00000160456.7/70729, intron 2 of 9)	1	170338209	170454914	116706	2	70729	ENSMUST00000160816.7	-23028	ENSMUSG00000038473	Nos1ap	nitric oxide synthase 1 (neuronal) adaptor protein
chr2	178415711	178417472	1762	*	890	1.14576	8.73117	1.32673e-31	merged_common	632.118	285.687	5' UTR	2	178414582	178420290	5709	1	71532	ENSMUST00000129003.1	1129	ENSMUSG00000070476	Fam217b	family with sequence similarity 217, member B
chr11	74837244	74839592	2349	*	1461	1.61126	7.75416	1.78771e-31	merged_common	377.358	123.514	Promoter	11	74837468	74843775	6308	1	17428	ENSMUST00000132150.1	0	ENSMUSG00000000282	Mnt	max binding protein
chr3	117308654	117309711	1058	*	476	-1.88405	7.29436	1.93869e-31	merged_common	81.704	301.577	Distal Intergenic	3	117321911	117360248	38338	2	229791	ENSMUST00000197743.1	50537	ENSMUSG00000044667	Plppr4	phospholipid phosphatase related 4
chr2	136947529	136948783	1255	*	677	-1.7841	7.4493	1.98961e-31	merged_common	94.1736	324.337	Intron (ENSMUST00000028737.12/74243, intron 2 of 5)	2	136905543	137069778	164236	1	74243	ENSMUST00000180277.2	41986	ENSMUSG00000027281	Slx4ip	SLX4 interacting protein
chr17	26507866	26509793	1928	*	727	1.48047	7.98068	2.00257e-31	merged_common	421.946	151.214	Promoter	17	26505590	26508519	2930	2	19252	ENSMUST00000025025.6	0	ENSMUSG00000024190	Dusp1	dual specificity phosphatase 1
chr4	53186677	53188038	1362	*	667	-1.39141	8.16237	2.11834e-31	merged_common	176.885	464.03	Distal Intergenic	4	53030787	53159895	129109	2	11303	ENSMUST00000030010.3	-26782	ENSMUSG00000015243	Abca1	ATP-binding cassette, sub-family A (ABC1), member 1
chr10	122990770	122992029	1260	*	375	-1.59203	7.76718	2.3884e-31	merged_common	125.467	378.25	Downstream (<1kb)	10	122985074	122985831	758	2	387251	ENSMUST00000220378.1	-4939	ENSMUSG00000065406	Mirlet7i	microRNA let7i
chr4	98096828	98096916	89	*	58	3.23701	5.70919	3.01388e-31	ATAC_PL_unique	160.641	17.038	Intron (ENSMUST00000075448.12/18027, intron 10 of 10)	4	97911033	98042595	131563	1	18027	ENSMUST00000133011.1	185795	ENSMUSG00000028565	Nfia	nuclear factor I/A
chr11	100938674	100940275	1602	*	864	1.02872	9.00981	5.03812e-31	merged_common	736.31	360.899	Promoter	11	100885098	100939404	54307	2	20848	ENSMUST00000103114.7	0	ENSMUSG00000004040	Stat3	signal transducer and activator of transcription 3
chr15	50108630	50109636	1007	*	456	-1.41702	8.08663	5.07551e-31	merged_common	166.355	444.223	Distal Intergenic	15	50819499	50827521	8023	2	83925	ENSMUST00000183421.1	717885	ENSMUSG00000038679	Trps1	transcriptional repressor GATA binding 1
chr11	117946335	117947344	1010	*	372	2.1346	6.90317	6.59372e-31	merged_common	250.813	57.1179	Distal Intergenic	11	117966079	117969186	3108	2	12702	ENSMUST00000054002.3	21842	ENSMUSG00000053113	Socs3	suppressor of cytokine signaling 3
chr1	143915920	143919639	3720	*	853	-0.75278	9.89235	6.66647e-31	merged_common	732.132	1233.67	Distal Intergenic	1	144001883	144004032	2150	2	19735	ENSMUST00000153527.2	84393	ENSMUSG00000026360	Rgs2	regulator of G-protein signaling 2
chr10	91299906	91300742	837	*	337	1.95111	7.17647	7.4278e-31	merged_common	284.449	73.5633	Distal Intergenic	10	91208258	91220642	12385	2	102633753	ENSMUST00000216311.1	-79264	NA	4930534H03Rik	RIKEN cDNA 4930534H03 gene
chr7	100500280	100505368	5089	*	2419	2.29411	6.68419	7.46493e-31	merged_common	227.74	46.4348	3' UTR	7	100498346	100499302	957	1	22228	ENSMUST00000149808.1	1934	ENSMUSG00000033685	Ucp2	uncoupling protein 2 (mitochondrial, proton carrier)
chr10	82923246	82924176	931	*	414	2.26123	6.72696	8.36319e-31	merged_common	231.935	48.3802	Distal Intergenic	10	82886846	82896312	9467	1	50493	ENSMUST00000218724.1	36400	ENSMUSG00000020250	Txnrd1	thioredoxin reductase 1
chr10	37358360	37359785	1426	*	759	-1.0296	8.99057	8.83083e-31	merged_common	356.009	726.778	Intron (ENSMUST00000181602.1/ENSMUST00000181602.1, intron 2 of 2)	10	37133375	37138920	5546	2	17118	ENSMUST00000092584.5	-219440	ENSMUSG00000069662	Marcks	myristoylated alanine rich protein kinase C substrate
chr18	25904290	25905772	1483	*	577	-1.89849	7.24539	9.04653e-31	merged_common	78.583	292.975	Distal Intergenic	18	25479115	25754157	275043	2	108013	ENSMUST00000225477.1	-150133	ENSMUSG00000024268	Celf4	CUGBP, Elav-like family member 4
chr8	84659608	84660830	1223	*	470	3.21859	5.70017	9.85686e-31	ATAC_PL_unique	158.624	17.0403	Downstream (<1kb)	8	84661331	84662852	1522	2	15936	ENSMUST00000060427.4	2022	ENSMUSG00000053560	Ier2	immediate early response 2
chr1	95459096	95460040	945	*	443	-1.90351	7.22869	1.51087e-30	merged_common	77.5436	290.108	Distal Intergenic	1	95313628	95327945	14318	1	67698	ENSMUST00000186780.1	145468	ENSMUSG00000051185	Fam174a	family with sequence similarity 174, member A
chr17	23966648	23967525	878	*	454	2.18082	6.82485	1.65488e-30	merged_common	241.396	53.24	Distal Intergenic	17	23972127	23973747	1621	2	30943	ENSMUST00000234145.1	6222	ENSMUSG00000024124	Prss30	protease, serine 30
chr16	92415632	92416660	1029	*	297	1.35167	8.20358	1.70468e-30	merged_common	470.945	184.534	Intron (ENSMUST00000060005.14/54720, intron 1 of 3)	16	92391955	92400077	8123	2	54720	ENSMUST00000023672.9	-15555	ENSMUSG00000022951	Rcan1	regulator of calcineurin 1
chr9	66113957	66114944	988	*	576	2.07578	6.96859	1.73458e-30	merged_common	257.152	60.9984	Intron (ENSMUST00000034946.14/56440, intron 1 of 14)	9	66104475	66105724	1250	2	56440	ENSMUST00000146893.1	-8233	ENSMUSG00000032382	Snx1	sorting nexin 1
chr5	32122053	32123080	1028	*	467	2.31569	6.63332	1.81479e-30	merged_common	221.5	44.492	Distal Intergenic	5	32135801	32157842	22042	1	14284	ENSMUST00000031017.10	-12721	ENSMUSG00000029135	Fosl2	fos-like antigen 2
chr1	166105150	166106311	1162	*	563	-2.02163	7.03573	2.60863e-30	merged_common	65.1149	264.394	Intron (ENSMUST00000192369.5/240892, intron 5 of 5)	1	166098153	166127896	29744	2	240892	ENSMUST00000085992.3	21585	ENSMUSG00000026564	Dusp27	dual specificity phosphatase 27 (putative)
chr10	118819678	118820617	940	*	434	-1.4045	8.07105	2.63062e-30	merged_common	165.284	437.549	Distal Intergenic	10	118861023	118868299	7277	2	69181	ENSMUST00000218692.1	47682	ENSMUSG00000028630	Dyrk2	dual-specificity tyrosine-(Y)-phosphorylation regulated kinase 2
chr4	132982785	132983522	738	*	414	3.4818	5.45006	2.75562e-30	ATAC_PL_unique	146.115	13.0788	Intron (ENSMUST00000124451.1/14191, intron 1 of 1)	4	132977116	133000767	23652	1	14191	ENSMUST00000171223.1	5669	ENSMUSG00000028874	Fgr	FGR proto-oncogene, Src family tyrosine kinase
chr3	83844824	83845703	880	*	383	2.56299	6.35841	3.01437e-30	merged_common	199.453	33.7523	Distal Intergenic	3	83836272	83841767	5496	2	24088	ENSMUST00000029623.10	-3057	ENSMUSG00000027995	Tlr2	toll-like receptor 2
chr10	126458066	126458902	837	*	276	-2.53499	6.36566	3.01437e-30	merged_common	34.2532	198.522	Distal Intergenic	10	126710282	126710391	110	2	102465224	ENSMUST00000184232.1	251489	ENSMUSG00000098756	Mir378d	microRNA 378d
chr17	77968562	77969844	1283	*	823	-1.37332	8.14449	3.24406e-30	merged_common	175.805	455.45	Distal Intergenic	17	78200248	78376592	176345	1	50766	ENSMUST00000112498.2	-230404	ENSMUSG00000024074	Crim1	cysteine rich transmembrane BMP regulator 1 (chordin like)
chr14	70333380	70334280	901	*	465	1.95184	7.13864	3.25557e-30	merged_common	277.157	71.6413	Promoter	14	70315793	70334198	18406	2	213053	ENSMUST00000152442.7	0	ENSMUSG00000022094	Slc39a14	solute carrier family 39 (zinc transporter), member 14
chr16	58542527	58544606	2080	*	863	-1.29662	8.29996	3.48563e-30	merged_common	201.083	493.967	Distal Intergenic	16	58469753	58524243	54491	2	54613	ENSMUST00000114358.8	-18284	ENSMUSG00000022747	St3gal6	ST3 beta-galactoside alpha-2,3-sialyltransferase 6
chr14	103162274	103163323	1050	*	741	-1.48063	7.91313	3.63323e-30	merged_common	144.289	402.667	Intron (ENSMUST00000160758.7/105689, intron 55 of 82)	14	103113411	103155263	41853	2	105689	ENSMUST00000161008.7	-7011	ENSMUSG00000033004	Mycbp2	MYC binding protein 2, E3 ubiquitin protein ligase
chr4	144905594	144907881	2288	*	1002	-1.31224	8.26163	4.43071e-30	merged_common	194.754	483.627	Intron (ENSMUST00000105744.7/20148, intron 2 of 5)	4	144918879	144919972	1094	1	20148	ENSMUST00000133265.1	-10998	ENSMUSG00000066026	Dhrs3	dehydrogenase/reductase (SDR family) member 3
chr19	55838841	55839790	950	*	493	2.45712	6.4637	5.02702e-30	merged_common	206.824	37.6647	Intron (ENSMUST00000061496.15/21416, intron 4 of 12)	19	55893352	55919618	26267	1	21416	ENSMUST00000145249.7	-53562	ENSMUSG00000024985	Tcf7l2	transcription factor 7 like 2, T cell specific, HMG box
chr9	99182018	99184105	2088	*	293	1.7143	7.49492	5.66515e-30	merged_common	326.756	99.579	Distal Intergenic	9	99101350	99140621	39272	2	74769	ENSMUST00000124723.1	-41397	ENSMUSG00000032462	Pik3cb	phosphatidylinositol-4,5-bisphosphate 3-kinase catalytic subunit beta
chr4	125144912	125145909	998	*	471	1.99121	7.05768	6.31641e-30	merged_common	265.632	66.8138	Distal Intergenic	4	125118423	125127840	9418	2	230738	ENSMUST00000036188.7	-17072	ENSMUSG00000042677	Zc3h12a	zinc finger CCCH type containing 12A
chr10	80086345	80087899	1555	*	679	2.01633	7.02781	6.71371e-30	merged_common	262.464	64.8774	5' UTR	10	80062416	80075439	13024	2	216161	ENSMUST00000217876.1	-10906	ENSMUSG00000035673	Sbno2	strawberry notch 2
chrX	13618504	13619009	506	*	224	-4.02545	4.99434	7.17263e-30	ATAC_PP_unique	7.8987	128.628	Intron (ENSMUST00000156096.7/12361, intron 6 of 23)	20	13632089	13640856	8768	1	23890	ENSMUST00000041708.9	-13080	ENSMUSG00000040229	Gpr34	G protein-coupled receptor 34
chr13	91168885	91170405	1521	*	1210	-1.9044	7.16979	7.41303e-30	merged_common	74.4185	278.588	Intron (ENSMUST00000022119.5/66795, intron 2 of 7)	13	90936006	91125610	189605	2	66795	ENSMUST00000223729.1	-43275	ENSMUSG00000021619	Atg10	autophagy related 10
chr7	104400414	104401580	1167	*	514	1.21404	8.47636	7.9859e-30	merged_common	542.463	233.834	5' UTR	7	104411685	104412267	583	2	20128	ENSMUST00000142124.1	10687	ENSMUSG00000030921	Trim30a	tripartite motif-containing 30A
chr2	127334820	127336685	1866	*	1243	1.444	7.96282	9.35622e-30	merged_common	411.52	151.253	Promoter	2	127336159	127338376	2218	1	13537	ENSMUST00000028846.6	0	ENSMUSG00000027368	Dusp2	dual specificity phosphatase 2
chr8	80948250	80949089	840	*	307	2.261	6.66797	9.45932e-30	merged_common	222.625	46.4456	Distal Intergenic	8	80998213	81014913	16701	2	74841	ENSMUST00000211538.1	65824	ENSMUSG00000038250	Usp38	ubiquitin specific peptidase 38
chr2	173334874	173336602	1729	*	1203	-1.59687	7.68256	9.57649e-30	merged_common	118.121	357.301	Distal Intergenic	2	173224458	173276533	52076	2	65112	ENSMUST00000036248.12	-58341	ENSMUSG00000038400	Pmepa1	prostate transmembrane protein, androgen induced 1
chr8	26907096	26908400	1305	*	648	-1.44232	7.97546	1.02918e-29	merged_common	152.673	414.9	Distal Intergenic	8	26814593	26880582	65990	2	72316	ENSMUST00000210732.1	-26514	ENSMUSG00000100335	2310008N11Rik	RIKEN cDNA 2310008N11 gene
chr19	21053441	21053976	536	*	290	3.18106	5.68179	1.04662e-29	ATAC_PL_unique	154.592	17.0448	Distal Intergenic	19	20783458	20954202	170745	2	13409	ENSMUST00000039500.3	-99239	ENSMUSG00000024749	Tmc1	transmembrane channel-like gene family 1
chr4	34428844	34431176	2333	*	801	-1.30878	8.252	1.05367e-29	merged_common	193.691	479.833	Distal Intergenic	4	34550937	34566908	15972	1	433693	ENSMUST00000084299.5	-119761	ENSMUSG00000028291	Akirin2	akirin 2
chr3	81101473	81103020	1548	*	850	-1.42275	8.01444	1.06495e-29	merged_common	157.922	423.382	Intron (ENSMUST00000029652.3/54635, intron 1 of 5)	3	81037424	81210770	173347	1	54635	ENSMUST00000143721.1	64049	ENSMUSG00000028019	Pdgfc	platelet-derived growth factor, C polypeptide
chr16	36708287	36710182	1896	*	1362	1.42209	8.0141	1.06495e-29	merged_common	423.185	157.921	Exon (ENSMUST00000023617.12/106347, exon 2 of 8)	16	36715538	36722260	6723	1	106347	ENSMUST00000128084.1	-5356	ENSMUSG00000022900	Ildr1	immunoglobulin-like domain containing receptor 1
chr4	101291904	101293854	1951	*	232	1.21759	8.45465	1.10374e-29	merged_common	535.019	230.058	Exon (ENSMUST00000131864.1/ENSMUST00000131864.1, exon 3 of 3)	4	101152367	101265282	112916	2	16451	ENSMUST00000102781.9	-26622	ENSMUSG00000028530	Jak1	Janus kinase 1
chr14	14868958	14869929	972	*	401	-1.85123	7.25905	1.19442e-29	merged_common	80.6406	290.958	Intron (ENSMUST00000224491.1/674895, intron 22 of 35)	14	14865222	14971658	106437	1	674895	ENSMUST00000134866.1	3736	ENSMUSG00000042567	Nek10	NIMA (never in mitosis gene a)- related kinase 10
chr17	79174910	79177017	2108	*	1668	1.75868	7.40126	1.2015e-29	merged_common	310.963	91.8953	Distal Intergenic	17	79077002	79081853	4852	1	70536	ENSMUST00000233899.1	97908	ENSMUSG00000024084	Qpct	glutaminyl-peptide cyclotransferase (glutaminyl cyclase)
chr12	86686151	86687440	1290	*	568	1.12212	8.68115	1.23061e-29	merged_common	605.595	278.221	Exon (ENSMUST00000021681.3/238328, exon 3 of 7)	12	86678700	86692091	13392	1	238328	ENSMUST00000021681.3	7451	ENSMUSG00000021256	Vash1	vasohibin 1
chr13	28512134	28513691	1558	*	867	-1.4889	7.87462	1.36495e-29	merged_common	140.086	393.187	Exon (ENSMUST00000154298.1/72518, exon 2 of 4)	13	28460941	28516781	55841	2	72518	ENSMUST00000154298.1	3090	NA	2610307P16Rik	RIKEN cDNA 2610307P16 gene
chr6	127154610	127155816	1207	*	500	2.8903	5.96648	1.45441e-29	ATAC_PL_unique	170.264	22.9644	Intron (ENSMUST00000180811.1/77558, intron 1 of 2)	6	127146023	127152193	6171	2	12444	ENSMUST00000201902.3	-2417	ENSMUSG00000000184	Ccnd2	cyclin D2
chr16	87660757	87662129	1373	*	644	0.91588	9.26532	1.4627e-29	merged_common	845.265	448.008	Distal Intergenic	16	87698945	87733346	34402	1	12013	ENSMUST00000026703.5	-36816	ENSMUSG00000025612	Bach1	BTB and CNC homology 1, basic leucine zipper transcription factor 1
chr16	15956121	15957038	918	*	425	1.90576	7.17298	1.74948e-29	merged_common	279.336	74.5481	Intron (ENSMUST00000040248.8/224008, intron 10 of 19)	16	15887286	15891031	3746	1	12609	ENSMUST00000096232.5	68835	ENSMUSG00000071637	Cebpd	CCAAT/enhancer binding protein (C/EBP), delta
chr5	88517820	88519781	1962	*	490	-1.45633	7.92162	1.89508e-29	merged_common	146.368	401.647	Downstream (<1kb)	5	88519809	88526640	6832	2	16069	ENSMUST00000164073.2	6859	ENSMUSG00000067149	Jchain	immunoglobulin joining chain
chr9	70942322	70943315	994	*	516	2.33896	6.58049	2.19078e-29	merged_common	215.265	42.5477	Intron (ENSMUST00000216798.1/15450, intron 1 of 8)	9	70798128	70934808	136681	2	15450	ENSMUST00000034731.9	-7514	ENSMUSG00000032207	Lipc	lipase, hepatic
chr18	39185370	39186484	1115	*	449	-1.65771	7.56545	2.24573e-29	merged_common	106.639	336.463	Intron (ENSMUST00000097593.8/71302, intron 11 of 22)	18	39227368	39372511	145144	1	71302	ENSMUST00000154551.7	-40884	ENSMUSG00000036452	Arhgap26	Rho GTPase activating protein 26
chr7	88997769	88998556	788	*	242	-1.45647	7.91127	3.20017e-29	merged_common	145.315	398.795	Distal Intergenic	7	89141856	89154300	12445	2	72759	ENSMUST00000156153.1	155744	ENSMUSG00000039428	Tmem135	transmembrane protein 135
chr4	139598561	139599605	1045	*	531	1.62408	7.59543	3.67961e-29	merged_common	339.548	110.155	Intron (ENSMUST00000123827.8/212632, intron 4 of 11)	4	139603186	139662691	59506	1	212647	ENSMUST00000178644.1	-3581	ENSMUSG00000028737	Aldh4a1	aldehyde dehydrogenase 4 family, member A1
chr10	125744021	125746014	1994	*	1016	-1.76961	7.35953	3.73444e-29	merged_common	88.9378	303.244	Distal Intergenic	10	125966219	125998013	31795	1	320398	ENSMUST00000217813.1	-220205	ENSMUSG00000020105	Lrig3	leucine-rich repeats and immunoglobulin-like domains 3
chr10	37248339	37250749	2411	*	1635	-1.14935	8.58668	3.86078e-29	merged_common	258.139	572.589	Distal Intergenic	10	37133375	37138920	5546	2	17118	ENSMUST00000092584.5	-109419	ENSMUSG00000069662	Marcks	myristoylated alanine rich protein kinase C substrate
chr10	96620590	96624101	3512	*	2821	2.04538	6.93074	5.01779e-29	merged_common	247.868	60.0482	3' UTR	10	96617554	96618668	1115	1	12226	ENSMUST00000218953.1	3036	ENSMUSG00000036478	Btg1	B cell translocation gene 1, anti-proliferative
chr12	108639715	108639888	174	*	76	3.10034	5.72302	5.02961e-29	ATAC_PL_unique	154.685	18.0365	Intron (ENSMUST00000077735.12/14026, intron 1 of 12)	12	108635753	108688513	52761	1	14026	ENSMUST00000172409.1	3962	ENSMUSG00000021262	Evl	Ena-vasodilator stimulated phosphoprotein
chr14	9388584	9389885	1302	*	796	-1.60744	7.62244	5.91154e-29	merged_common	112.886	343.975	Distal Intergenic	14	9884195	9886768	2574	1	100042415	ENSMUST00000224435.1	-494310	ENSMUSG00000089686	Mnd1-ps	Mnd1 retrotransposed pseudogene
chr14	123837268	123838086	819	*	287	-1.59285	7.64154	7.00651e-29	merged_common	114.97	346.801	Intron (ENSMUST00000049681.13/223272, intron 3 of 10)	14	123987635	124015684	28050	1	69393	ENSMUST00000190088.1	-149549	ENSMUSG00000099994	1700024B18Rik	RIKEN cDNA 1700024B18 gene
chr15	69085488	69086632	1145	*	470	-2.11086	6.83089	8.5125e-29	merged_common	54.7755	236.602	Intron (ENSMUST00000022954.6/13992, intron 7 of 8)	15	68930068	69024765	94698	1	13992	ENSMUST00000230073.1	155420	ENSMUSG00000022332	Khdrbs3	KH domain containing, RNA binding, signal transduction associated 3
chr5	44052232	44053320	1089	*	535	-1.80107	7.28836	8.79596e-29	merged_common	83.7388	291.812	Intron (ENSMUST00000074113.12/19126, intron 5 of 27)	5	44026795	44045573	18779	2	19126	ENSMUST00000198347.1	-6659	ENSMUSG00000029086	Prom1	prominin 1
chr10	111539608	111540657	1050	*	531	1.8387	7.21261	8.82711e-29	merged_common	280.52	78.426	Distal Intergenic	10	111507696	111508165	470	1	21664	ENSMUST00000186359.1	31912	ENSMUSG00000020205	Phlda1	pleckstrin homology like domain, family A, member 1
chr8	84984298	84986750	2453	*	1648	1.42701	7.94542	1.05236e-28	merged_common	404.2	150.322	Distal Intergenic	8	84990603	85003343	12741	1	170833	ENSMUST00000209764.1	-3853	ENSMUSG00000052566	Hook2	hook microtubule tethering protein 2
chr16	55663479	55664665	1187	*	659	-1.39389	8.01884	1.08293e-28	merged_common	159.996	420.448	Distal Intergenic	16	55811375	55822138	10764	2	80859	ENSMUST00000114458.7	157473	ENSMUSG00000035356	Nfkbiz	nuclear factor of kappa light polypeptide gene enhancer in B cells inhibitor, zeta
chr8	115555110	115556374	1265	*	496	-1.25548	8.30902	1.19583e-28	merged_common	205.256	490.041	Distal Intergenic	8	115701435	115707794	6360	2	17132	ENSMUST00000109104.1	151420	ENSMUSG00000055435	Maf	avian musculoaponeurotic fibrosarcoma oncogene homolog
chr15	9529417	9530775	1359	*	441	-1.37574	8.04712	1.24464e-28	merged_common	164.193	426.083	Promoter	15	9505788	9529828	24041	2	16197	ENSMUST00000228782.1	0	ENSMUSG00000003882	Il7r	interleukin 7 receptor
chr16	76053031	76055501	2471	*	659	-1.34249	8.12004	1.43303e-28	merged_common	174.707	443.038	Distal Intergenic	16	75859257	76022270	163014	2	67742	ENSMUST00000114240.2	-30761	ENSMUSG00000022876	Samsn1	SAM domain, SH3 domain and nuclear localization signals, 1
chr4	119911224	119912861	1638	*	611	-1.69601	7.436	1.66506e-28	merged_common	96.202	311.698	Intron (ENSMUST00000143837.1/16656, intron 1 of 1)	4	119814495	120138045	323551	1	16656	ENSMUST00000106307.8	96729	ENSMUSG00000028634	Hivep3	human immunodeficiency virus type I enhancer binding protein 3
chr10	19009068	19009798	731	*	348	1.98558	6.99118	1.85966e-28	merged_common	253.171	63.9286	Promoter	10	19007267	19008845	1579	2	21929	ENSMUST00000154749.1	-223	ENSMUSG00000019850	Tnfaip3	tumor necrosis factor, alpha-induced protein 3
chr12	25239962	25240784	823	*	374	4.26229	4.73989	1.99806e-28	ATAC_PL_unique	117.054	6.09973	Distal Intergenic	12	25129174	25134931	5758	1	432641	ENSMUST00000223429.1	110788	NA	Gm17746	predicted gene, 17746
chr16	36717385	36718158	774	*	307	2.03821	6.90388	2.13529e-28	merged_common	242.692	59.0872	Exon (ENSMUST00000153802.1/106347, exon 5 of 5)	16	36715538	36722260	6723	1	106347	ENSMUST00000128084.1	1847	ENSMUSG00000022900	Ildr1	immunoglobulin-like domain containing receptor 1
chr1	60862857	60864171	1315	*	241	-2.07482	6.86608	2.20408e-28	merged_common	56.8335	239.435	Distal Intergenic	1	60887000	60912716	25717	1	12477	ENSMUST00000124816.1	-22829	ENSMUSG00000026011	Ctla4	cytotoxic T-lymphocyte-associated protein 4
chr9	84027876	84028596	721	*	429	-2.33729	6.50421	2.29954e-28	merged_common	40.3799	204.061	Intron (ENSMUST00000190637.6/12040, intron 8 of 10)	9	84035840	84124198	88359	1	12040	ENSMUST00000189819.6	-7244	ENSMUSG00000032263	Bckdhb	branched chain ketoacid dehydrogenase E1, beta polypeptide
chr10	82795870	82796019	150	*	76	2.47672	6.35712	2.41177e-28	ATAC_PL_unique	193.405	34.7456	Distal Intergenic	10	82812123	82824242	12120	1	70003	ENSMUST00000076984.7	-16104	ENSMUSG00000056821	1700028I16Rik	RIKEN cDNA 1700028I16 gene
chr9	21288545	21288791	247	*	93	1.51434	7.75051	2.53493e-28	merged_common	363.971	127.41	Promoter	9	21281995	21287969	5975	2	215194	ENSMUST00000183503.1	-576	ENSMUSG00000035047	Kri1	KRI1 homolog
chr2	148899069	148902862	3794	*	1412	-1.94444	7.04166	2.62333e-28	merged_common	67.1558	258.475	Distal Intergenic	2	148872848	148875692	2845	2	13010	ENSMUST00000144845.1	-23377	ENSMUSG00000027447	Cst3	cystatin C
chr2	170321497	170322464	968	*	611	1.75062	7.33588	3.58566e-28	merged_common	296.357	88.0695	Distal Intergenic	2	170347931	170349740	1810	2	76960	ENSMUST00000156657.7	27276	ENSMUSG00000013523	Bcas1	breast carcinoma amplified sequence 1
chr9	22640869	22641579	711	*	333	-2.07793	6.84111	3.60261e-28	merged_common	55.7981	235.58	Intron (ENSMUST00000039798.15/319845, intron 12 of 21)	9	22643841	22888280	244440	1	319845	ENSMUST00000127296.7	-2262	ENSMUSG00000035919	Bbs9	Bardet-Biedl syndrome 9 (human)
chr10	100159656	100161527	1872	*	700	-0.89916	9.2354	4.03312e-28	merged_common	441.362	823.132	Distal Intergenic	10	100088056	100097181	9126	1	17311	ENSMUST00000219881.1	71600	ENSMUSG00000019966	Kitl	kit ligand
chr12	35798849	35800862	2014	*	571	0.96536	9.03377	4.46626e-28	merged_common	732.381	375.089	Distal Intergenic	12	35672380	35695118	22739	2	71581	ENSMUST00000222153.1	-103731	ENSMUSG00000113985	9130015A21Rik	RIKEN cDNA 9130015A21 gene
chr4	125131184	125131926	743	*	344	2.54056	6.26178	4.75854e-28	merged_common	185.087	31.812	Distal Intergenic	4	125118423	125127840	9418	2	230738	ENSMUST00000036188.7	-3344	ENSMUSG00000042677	Zc3h12a	zinc finger CCCH type containing 12A
chr12	25213556	25214952	1397	*	567	1.40514	7.95282	5.1403e-28	merged_common	403.211	152.245	Distal Intergenic	12	25129174	25134931	5758	1	432641	ENSMUST00000223429.1	84382	NA	Gm17746	predicted gene, 17746
chr8	45414339	45416377	2039	*	823	-0.85984	9.3494	6.84247e-28	merged_common	484.207	878.757	Distal Intergenic	8	45409820	45411080	1261	2	142980	ENSMUST00000209269.1	-3259	ENSMUSG00000031639	Tlr3	toll-like receptor 3
chr18	25680330	25682507	2178	*	1029	-1.13968	8.54565	7.25271e-28	merged_common	251.743	554.672	Intron (ENSMUST00000115816.2/108013, intron 1 of 12)	18	25504220	25752692	248473	2	108013	ENSMUST00000225927.1	70185	ENSMUSG00000024268	Celf4	CUGBP, Elav-like family member 4
chr10	82958057	82958868	812	*	465	2.2715	6.57994	8.06834e-28	merged_common	210.21	43.5376	Distal Intergenic	10	82985498	83195900	210403	1	58250	ENSMUST00000040110.7	-26630	ENSMUSG00000034612	Chst11	carbohydrate sulfotransferase 11
chr14	58323099	58323907	809	*	292	2.25387	6.60305	8.40575e-28	merged_common	212.304	44.5118	Intron (ENSMUST00000225434.1/ENSMUST00000225434.1, intron 2 of 2)	14	58076507	58109392	32886	1	14180	ENSMUST00000166770.1	246592	ENSMUSG00000021974	Fgf9	fibroblast growth factor 9
chr16	87724561	87725761	1201	*	386	2.71718	6.05492	8.641e-28	ATAC_PL_unique	170.486	25.926	Intron (ENSMUST00000026703.5/12013, intron 4 of 4)	16	87699004	87722920	23917	1	12013	ENSMUST00000156958.1	25557	ENSMUSG00000025612	Bach1	BTB and CNC homology 1, basic leucine zipper transcription factor 1
chr6	30259084	30259915	832	*	408	2.0087	6.91278	8.64792e-28	merged_common	241.709	60.0641	Intron (ENSMUST00000102993.9/22214, intron 3 of 6)	6	30214809	30243803	28995	2	22214	ENSMUST00000128141.7	-15281	ENSMUSG00000039159	Ube2h	ubiquitin-conjugating enzyme E2H
chr12	87406723	87408529	1807	*	980	1.82396	7.18762	8.86632e-28	merged_common	274.298	77.474	Distal Intergenic	12	87305058	87388355	83298	2	20773	ENSMUST00000021424.4	-18368	ENSMUSG00000021036	Sptlc2	serine palmitoyltransferase, long chain base subunit 2
chr7	134555872	134557132	1261	*	456	-2.11249	6.77609	9.63155e-28	merged_common	52.7042	227.912	Distal Intergenic	7	134670654	134876943	206290	1	330662	ENSMUST00000211570.1	-113522	ENSMUSG00000058325	Dock1	dedicator of cytokinesis 1
chr14	37109135	37110407	1273	*	516	-1.5952	7.57543	9.80202e-28	merged_common	109.731	331.538	Promoter	14	37102142	37110101	7960	2	70045	ENSMUST00000179488.2	0	ENSMUSG00000096001	2610528A11Rik	RIKEN cDNA 2610528A11 gene
chr10	37841639	37842531	893	*	476	-2.4551	6.32485	1.04445e-27	merged_common	34.2326	187.715	Distal Intergenic	10	38175780	38181903	6124	1	75877	ENSMUST00000215643.1	-333249	ENSMUSG00000111234	4930591E09Rik	RIKEN cDNA 4930591E09 gene
chr2	60901118	60902133	1016	*	463	1.44403	7.85953	1.19648e-27	merged_common	383.091	140.801	Intron (ENSMUST00000028347.12/56878, intron 1 of 13)	2	60842297	60889030	46734	2	56878	ENSMUST00000132529.7	-12088	ENSMUSG00000026970	Rbms1	RNA binding motif, single stranded interacting protein 1
chr3	37313174	37314224	1051	*	442	1.38461	7.97831	1.25168e-27	merged_common	407.488	156.065	Promoter	3	37309345	37312708	3364	2	207175	ENSMUST00000125252.2	-466	ENSMUSG00000045031	Cetn4	centrin 4
chr15	63616089	63617653	1565	*	945	-1.02253	8.84126	1.29738e-27	merged_common	321.794	653.718	Intron (ENSMUST00000228339.2/432958, intron 2 of 8)	15	63176838	63718289	541452	2	432958	ENSMUST00000228339.2	100636	ENSMUSG00000115520	Gm20740	predicted gene, 20740
chr13	43790314	43791903	1590	*	523	2.2158	6.61546	1.38679e-27	merged_common	211.331	45.4926	Intron (ENSMUST00000015540.3/12522, intron 2 of 4)	13	43785185	43803128	17944	1	12522	ENSMUST00000221359.1	5129	ENSMUSG00000015396	Cd83	CD83 antigen
chr2	129296658	129298932	2275	*	692	1.13818	8.53475	1.39836e-27	merged_common	550.211	249.978	Promoter	2	129297370	129307826	10457	1	100503468	ENSMUST00000144178.1	0	ENSMUSG00000085498	Gm14023	predicted gene 14023
chr14	103784821	103785905	1085	*	452	-1.06839	8.71364	1.45092e-27	merged_common	289.907	607.961	Distal Intergenic	14	103814728	103843695	28968	2	13618	ENSMUST00000227824.1	57790	ENSMUSG00000022122	Ednrb	endothelin receptor type B
chr17	86283382	86284394	1013	*	562	-1.64973	7.45866	1.52425e-27	merged_common	99.305	311.594	Intron (ENSMUST00000097275.8/18754, intron 1 of 14)	17	86285164	86287178	2015	2	72104	ENSMUST00000191222.1	2784	ENSMUSG00000100738	2010106C02Rik	RIKEN cDNA 2010106C02 gene
chr14	8099401	8100253	853	*	503	2.13221	6.7203	1.54984e-27	merged_common	220.771	50.3596	Intron (ENSMUST00000036682.8/218699, intron 1 of 17)	14	8098255	8165111	66857	1	218699	ENSMUST00000225653.1	1146	ENSMUSG00000033885	Pxk	PX domain containing serine/threonine kinase
chr18	15664421	15666056	1636	*	726	-1.58032	7.59512	1.7296e-27	merged_common	111.814	334.365	Intron (ENSMUST00000053017.12/71367, intron 1 of 3)	18	15451924	15718046	266123	2	71367	ENSMUST00000053017.12	51990	ENSMUSG00000047161	Chst9	carbohydrate (N-acetylgalactosamine 4-0) sulfotransferase 9
chr4	7992746	7993779	1034	*	378	-2.37466	6.40839	2.38416e-27	merged_common	37.2989	193.437	Distal Intergenic	4	8143362	8239041	95680	2	12319	ENSMUST00000066674.7	245262	ENSMUSG00000041261	Car8	carbonic anhydrase 8
chr13	91370481	91373294	2814	*	527	-1.28009	8.18111	2.54813e-27	merged_common	186.246	452.306	Exon (ENSMUST00000181054.2/320297, exon 2 of 3)	13	91368990	91388085	19096	2	320297	ENSMUST00000181054.2	14791	ENSMUSG00000097182	A830009L08Rik	RIKEN cDNA A830009L08 gene
chr6	142503692	142504687	996	*	608	-1.20931	8.35096	2.66344e-27	merged_common	214.719	496.488	Intron (ENSMUST00000032373.11/16832, intron 2 of 7)	6	142490336	142501387	11052	2	16832	ENSMUST00000204433.2	-2305	ENSMUSG00000030246	Ldhb	lactate dehydrogenase B
chr10	62503355	62504771	1417	*	653	3.21833	5.52322	2.9783e-27	ATAC_PL_unique	140.301	15.0747	Intron (ENSMUST00000160987.7/19073, intron 2 of 3)	10	62494428	62507755	13328	2	19073	ENSMUST00000020271.12	2984	ENSMUSG00000020077	Srgn	serglycin
chr7	125560259	125562067	1809	*	1183	1.76443	7.24517	3.47486e-27	merged_common	279.632	82.3077	Intron (ENSMUST00000033004.7/16190, intron 1 of 10)	7	125552287	125577967	25681	1	16190	ENSMUST00000206846.1	7972	ENSMUSG00000030748	Il4ra	interleukin 4 receptor, alpha
chr2	101810415	101811289	875	*	446	2.00076	6.88554	3.66373e-27	merged_common	236.537	59.103	Intron (ENSMUST00000163762.7/72446, intron 2 of 9)	2	101772184	101814333	42150	2	72446	ENSMUST00000144549.1	3044	ENSMUSG00000032841	Prr5l	proline rich 5 like
chr16	16907458	16908291	834	*	580	2.13289	6.69266	4.08686e-27	merged_common	216.632	49.3923	Intron (ENSMUST00000027373.11/68606, intron 2 of 7)	16	16896574	16915194	18621	1	68606	ENSMUST00000232247.1	10884	ENSMUSG00000026181	Ppm1f	protein phosphatase 1F (PP2C domain containing)
chrX	96608754	96610419	1666	*	895	-1.74964	7.27996	4.10714e-27	merged_common	84.7499	284.992	Distal Intergenic	20	96713441	96716520	3080	1	76206	ENSMUST00000139205.7	-103022	ENSMUSG00000031210	Gpr165	G protein-coupled receptor 165
chr18	37877258	37878238	981	*	561	2.2429	6.56593	6.00171e-27	merged_common	206.126	43.5463	Intron (ENSMUST00000115634.7/13367, intron 17 of 26)	18	37896157	37897942	1786	2	13367	ENSMUST00000129688.1	19704	ENSMUSG00000024456	Diaph1	diaphanous related formin 1
chr19	6299334	6300250	917	*	322	1.83415	7.13792	6.10489e-27	merged_common	265.947	74.5866	3' UTR	19	6297914	6298360	447	1	13660	ENSMUST00000148547.1	1420	ENSMUSG00000024772	Ehd1	EH-domain containing 1
chr10	125726361	125727623	1263	*	393	-1.81819	7.1458	6.10489e-27	merged_common	75.4111	265.929	Distal Intergenic	10	125966219	125998013	31795	1	320398	ENSMUST00000217813.1	-238596	ENSMUSG00000020105	Lrig3	leucine-rich repeats and immunoglobulin-like domains 3
chr1	182108302	182109144	843	*	354	2.14062	6.6679	6.59737e-27	merged_common	213.517	48.422	Distal Intergenic	1	182124737	182131919	7183	1	27058	ENSMUST00000111018.1	-15593	ENSMUSG00000026511	Srp9	signal recognition particle 9
chr1	150099510	150100424	915	*	465	2.07163	6.7714	6.64591e-27	merged_common	223.978	53.2823	Promoter	1	150100031	150108227	8197	1	19225	ENSMUST00000035065.8	0	ENSMUSG00000032487	Ptgs2	prostaglandin-endoperoxide synthase 2
chr19	6297403	6298110	708	*	355	2.11179	6.71031	6.70733e-27	merged_common	217.701	50.3673	Promoter	19	6297914	6298360	447	1	13660	ENSMUST00000148547.1	0	ENSMUSG00000024772	Ehd1	EH-domain containing 1
chr8	11463408	11465133	1726	*	906	1.34201	8.02597	6.83436e-27	merged_common	415.002	163.706	Intron (ENSMUST00000033900.6/19332, intron 1 of 1)	8	11477929	11480241	2313	1	102132	ENSMUST00000180408.1	-12796	ENSMUSG00000096957	E230013L22Rik	RIKEN cDNA E230013L22 gene
chr6	37195857	37197430	1574	*	1171	-1.5586	7.59749	7.63401e-27	merged_common	112.844	332.403	Intron (ENSMUST00000101532.9/320127, intron 1 of 33)	6	36847156	37299637	452482	2	320127	ENSMUST00000042075.7	102207	ENSMUSG00000038665	Dgki	diacylglycerol kinase, iota
chr19	21285832	21288820	2989	*	922	2.28367	6.48613	1.44718e-26	merged_common	197.809	40.625	Distal Intergenic	19	21276040	21280971	4932	1	22682	ENSMUST00000133175.1	9792	ENSMUSG00000024750	Zfand5	zinc finger, AN1-type domain 5
chr10	38211172	38212845	1674	*	626	-1.59327	7.50391	1.54794e-26	merged_common	104.494	315.292	Distal Intergenic	10	38175780	38181903	6124	1	75877	ENSMUST00000215643.1	35392	ENSMUSG00000111234	4930591E09Rik	RIKEN cDNA 4930591E09 gene
chr8	94171174	94173009	1836	*	992	2.74088	5.95345	1.55339e-26	merged_common	160.218	23.9675	Promoter	8	94172664	94173568	905	1	17750	ENSMUST00000034214.7	0	ENSMUSG00000031762	Mt2	metallothionein 2
chr10	70194416	70196393	1978	*	1114	-1.25272	8.19149	1.77223e-26	merged_common	189.379	451.271	Distal Intergenic	10	70204664	70215285	10622	1	69563	ENSMUST00000188568.1	-8271	ENSMUSG00000019933	Mrln	myoregulin
chr15	72528199	72528956	758	*	376	-1.5512	7.58025	1.93041e-26	merged_common	111.79	327.613	Intron (ENSMUST00000044624.7/223604, intron 1 of 1)	15	72501089	72546340	45252	2	223604	ENSMUST00000044624.7	17384	ENSMUSG00000036760	Kcnk9	potassium channel, subfamily K, member 9
chr9	103148759	103149765	1007	*	481	-1.51774	7.64214	1.95433e-26	merged_common	118.051	338.031	Intron (ENSMUST00000189134.1/270192, intron 1 of 3)	9	103111807	103185276	73470	1	270192	ENSMUST00000035155.7	36952	ENSMUSG00000032549	Rab6b	RAB6B, member RAS oncogene family
chr4	34456730	34457754	1025	*	717	-1.60485	7.48063	1.9637e-26	merged_common	102.409	311.493	Distal Intergenic	4	34550937	34566908	15972	1	433693	ENSMUST00000084299.5	-93183	ENSMUSG00000028291	Akirin2	akirin 2
chr1	64078286	64079117	832	*	302	1.875	7.04174	2.27204e-26	merged_common	252.343	68.7954	Exon (ENSMUST00000149820.1/ENSMUST00000149820.1, exon 1 of 4)	1	64042438	64042501	64	2	102466760	ENSMUST00000184798.1	-35785	ENSMUSG00000098487	Mir6899	microRNA 6899
chr8	41015997	41017147	1151	*	416	-0.93716	9.01526	2.54139e-26	merged_common	373.944	716.012	Promoter	8	41000675	41016755	16081	2	102103	ENSMUST00000155626.7	0	ENSMUSG00000045636	Mtus1	mitochondrial tumor suppressor 1
chr1	33501662	33504672	3011	*	1399	-1.3678	7.93739	2.57559e-26	merged_common	152.587	393.792	Intron (ENSMUST00000027312.10/19076, intron 10 of 13)	1	33478942	33622142	143201	2	19076	ENSMUST00000189552.1	117470	ENSMUSG00000026134	Prim2	DNA primase, p58 subunit
chr2	152741364	152742280	917	*	469	1.64553	7.40473	2.59194e-26	merged_common	299.725	95.8007	Distal Intergenic	2	152736251	152737410	1160	1	15901	ENSMUST00000038368.8	5113	ENSMUSG00000042745	Id1	inhibitor of DNA binding 1, HLH protein
chr13	113588474	113592307	3834	*	1237	1.50178	7.66679	2.86478e-26	merged_common	341.959	120.752	3' UTR	13	113592185	113613641	21457	2	170625	ENSMUST00000223993.1	21334	ENSMUSG00000042364	Snx18	sorting nexin 18
chr6	134034510	134036638	2129	*	1244	0.96847	8.91138	2.92988e-26	merged_common	673.538	344.21	Promoter	6	134035700	134270155	234456	1	14011	ENSMUST00000081028.12	0	ENSMUSG00000030199	Etv6	ets variant 6
chr11	45807531	45808708	1178	*	574	-1.91862	6.9599	3.0471e-26	merged_common	64.0262	242.058	Promoter	11	45808087	45841171	33085	1	100009664	ENSMUST00000137002.1	0	NA	F630206G17Rik	RIKEN cDNA F630206G17 gene
chr7	49544314	49545584	1271	*	701	-1.30995	8.05014	3.12921e-26	merged_common	168.332	417.35	Intron (ENSMUST00000183659.7/78286, intron 13 of 39)	7	49548192	49556996	8805	1	78286	ENSMUST00000184109.1	-2608	ENSMUSG00000052512	Nav2	neuron navigator 2
chr7	35098025	35099894	1870	*	1011	-1.36135	7.94403	3.18458e-26	merged_common	153.634	394.725	Distal Intergenic	7	35119303	35121928	2626	1	12606	ENSMUST00000042985.10	-19409	ENSMUSG00000034957	Cebpa	CCAAT/enhancer binding protein (C/EBP), alpha
chr4	120031934	120033573	1640	*	791	1.09569	8.56202	3.37278e-26	merged_common	552.513	258.528	Promoter	4	120032766	120065063	32298	1	16656	ENSMUST00000227491.1	0	ENSMUSG00000028634	Hivep3	human immunodeficiency virus type I enhancer binding protein 3
chr1	93069112	93070102	991	*	409	2.26856	6.47873	3.96954e-26	merged_common	195.769	40.6293	Promoter	1	93066132	93068758	2627	2	16560	ENSMUST00000190249.1	-354	ENSMUSG00000014602	Kif1a	kinesin family member 1A
chr11	117194414	117194935	522	*	237	2.93587	5.71888	4.05697e-26	ATAC_PL_unique	145.696	19.0398	Distal Intergenic	11	117199661	117362325	162665	1	53860	ENSMUST00000093907.10	-4726	ENSMUSG00000059248	2009-09-01	septin 9
chr3	130273453	130274469	1017	*	649	-1.56259	7.54493	4.21912e-26	merged_common	108.657	320.954	Intron (ENSMUST00000143830.2/77018, intron 2 of 19)	3	130180891	130599877	418987	1	77018	ENSMUST00000106353.1	92562	ENSMUSG00000058897	Col25a1	collagen, type XXV, alpha 1
chr9	44733790	44735146	1357	*	507	3.31202	5.36693	4.29201e-26	ATAC_PL_unique	130.052	13.0948	Promoter	9	44686308	44735198	48891	2	102693	ENSMUST00000034611.14	52	ENSMUSG00000048537	Phldb1	pleckstrin homology like domain, family B, member 1
chr8	60883226	60884216	991	*	431	-1.34863	7.95718	4.84361e-26	merged_common	155.726	396.587	Distal Intergenic	8	60890418	60907575	17158	1	72612	ENSMUST00000146863.1	-6202	ENSMUSG00000038005	Hpf1	histone PARylation factor 1
chr19	9985654	9987853	2200	*	1008	3.68974	5.03237	5.20813e-26	ATAC_PL_unique	117.559	9.11031	Exon (ENSMUST00000117346.1/24115, exon 10 of 12)	19	9982703	9985092	2390	1	14319	ENSMUST00000025563.6	2951	ENSMUSG00000024661	Fth1	ferritin heavy polypeptide 1
chr18	4352282	4355402	3121	*	854	0.85659	9.24526	6.28467e-26	merged_common	816.639	450.994	Promoter	18	4331340	4352957	21618	2	26410	ENSMUST00000173930.7	0	ENSMUSG00000024235	Map3k8	mitogen-activated protein kinase kinase kinase 8
chr17	35199800	35202642	2843	*	819	1.99059	6.83267	6.56259e-26	merged_common	227.223	57.1775	Promoter	17	35199381	35202007	2627	2	21926	ENSMUST00000025263.14	0	ENSMUSG00000024401	Tnf	tumor necrosis factor
chr12	112896887	112898306	1420	*	877	1.60902	7.44337	8.50406e-26	merged_common	303.99	99.6543	Distal Intergenic	12	112910455	112913180	2726	2	16450	ENSMUST00000221454.1	14874	ENSMUSG00000002799	Jag2	jagged 2
chr8	94178422	94180727	2306	*	651	1.03994	8.67936	1.05643e-25	merged_common	587.86	285.905	Promoter	8	94179082	94180327	1246	1	17748	ENSMUST00000034215.7	0	ENSMUSG00000031765	Mt1	metallothionein 1
chr19	46340711	46341383	673	*	314	2.2533	6.47126	1.085e-25	merged_common	193.731	40.6339	Promoter	19	46341121	46375252	34132	1	75146	ENSMUST00000128041.7	0	ENSMUSG00000025227	Mfsd13a	major facilitator superfamily domain containing 13a
chr6	124805208	124805952	745	*	521	1.7263	7.22651	1.11372e-25	merged_common	272.415	82.3308	Distal Intergenic	6	124808661	124810619	1959	1	14794	ENSMUST00000047760.9	-2709	ENSMUSG00000038451	Spsb2	splA/ryanodine receptor domain and SOCS box containing 2
chr9	86015112	86017066	1955	*	1000	-1.08291	8.55867	1.15685e-25	merged_common	259.073	548.796	Distal Intergenic	9	85843361	85843925	565	1	21983	ENSMUST00000185559.1	171751	ENSMUSG00000035274	Tpbg	trophoblast glycoprotein
chr18	60268376	60269336	961	*	377	-1.38524	7.85383	1.16765e-25	merged_common	143.133	373.885	3' UTR	18	60268301	60273267	4967	2	225594	ENSMUST00000090260.4	3931	ENSMUSG00000068606	Gm4841	predicted gene 4841
chr15	93916421	93917740	1320	*	666	-1.49273	7.64212	1.21177e-25	merged_common	119.077	335.109	Intron (ENSMUST00000230109.1/77248, intron 2 of 3)	15	93904856	93927111	22256	2	77248	ENSMUST00000230109.1	9371	ENSMUSG00000116360	9430014N10Rik	RIKEN cDNA 9430014N10 gene
chr3	48100256	48101880	1625	*	844	-0.95474	8.91724	1.23879e-25	merged_common	347.259	673.069	Distal Intergenic	3	48026013	48026760	748	2	666202	ENSMUST00000193787.1	-73496	ENSMUSG00000103257	Gm7977	tyrosine 3-monooxygenase/tryptophan 5-monooxygenase activation protein, theta polypeptide pseudogene
chr16	4912785	4914193	1409	*	591	1.46137	7.71375	1.26704e-25	merged_common	348.36	126.506	Promoter	16	4913211	4915819	2609	1	17237	ENSMUST00000230220.1	0	ENSMUSG00000022517	Mgrn1	mahogunin, ring finger 1
chr12	10754935	10755660	726	*	330	-1.9132	6.93354	1.27161e-25	merged_common	62.9852	237.23	Distal Intergenic	12	10526775	10531098	4324	1	328061	ENSMUST00000218017.1	228160	ENSMUSG00000112792	Gm38407	predicted gene, 38407
chr11	115071614	115072355	742	*	288	2.35814	6.33886	1.36754e-25	merged_common	183.283	35.748	Distal Intergenic	11	115051917	115062177	10261	2	217306	ENSMUST00000062787.7	-9437	ENSMUSG00000048498	Cd300e	CD300E molecule
chr6	94531730	94532730	1001	*	504	-1.53003	7.56944	1.41094e-25	merged_common	111.773	322.791	Intron (ENSMUST00000061118.10/67582, intron 3 of 9)	6	94534140	94603862	69723	1	67582	ENSMUST00000205173.2	-1410	ENSMUSG00000045100	Slc25a26	solute carrier family 25 (mitochondrial carrier, phosphate carrier), member 26
chr9	89261536	89263180	1645	*	396	-1.35918	7.90281	1.41749e-25	merged_common	149.419	383.319	Exon (ENSMUST00000192418.1/ENSMUST00000192418.1, exon 1 of 1)	9	89218454	89240170	21717	1	107885	ENSMUST00000147644.1	43082	ENSMUSG00000066442	Mthfs	5, 10-methenyltetrahydrofolate synthetase
chr1	180943879	180946501	2623	*	719	1.56263	7.50141	1.5598e-25	merged_common	311.422	105.427	Promoter	1	180944035	180975103	31069	1	208795	ENSMUST00000161523.7	0	ENSMUSG00000026519	Tmem63a	transmembrane protein 63a
chr14	114874481	114876224	1744	*	850	-1.80005	7.09615	1.58791e-25	merged_common	73.3195	255.322	Exon (ENSMUST00000226159.1/ENSMUST00000226159.1, exon 2 of 2)	14	114831965	114861327	29363	1	75822	ENSMUST00000226121.1	42516	ENSMUSG00000115320	4930524C18Rik	RIKEN cDNA 4930524C18 gene
chr17	10327632	10329689	2058	*	1125	-1.56679	7.49038	1.76737e-25	merged_common	104.473	309.496	Exon (ENSMUST00000187397.6/76634, exon 3 of 3)	17	10324602	10329307	4706	1	76634	ENSMUST00000188715.1	3030	ENSMUSG00000099384	1700110C19Rik	RIKEN cDNA 1700110C19 gene
chr2	11429143	11430272	1130	*	648	1.14091	8.39926	1.77039e-25	merged_common	501.364	227.355	Distal Intergenic	2	11338366	11398501	60136	2	77543	ENSMUST00000192626.1	-30642	ENSMUSG00000102674	8030442B05Rik	RIKEN cDNA 8030442B05 gene
chr17	63198429	63199435	1007	*	487	-1.48862	7.64002	1.78829e-25	merged_common	119.074	334.145	Intron (ENSMUST00000024761.12/50758, intron 7 of 8)	17	63305446	63312971	7526	2	414079	ENSMUST00000164605.7	113536	ENSMUSG00000090565	4930405O22Rik	RIKEN cDNA 4930405O22 gene
chr6	47390480	47391648	1169	*	298	-1.70528	7.2573	1.94881e-25	merged_common	84.7217	276.271	Distal Intergenic	6	47453398	47497237	43840	1	26965	ENSMUST00000146828.7	-61750	ENSMUSG00000029686	Cul1	cullin 1
chr5	100636649	100637454	806	*	391	2.39781	6.27753	1.95345e-25	merged_common	178.087	33.7924	Distal Intergenic	5	100660172	100664419	4248	2	71883	ENSMUST00000135801.2	26965	ENSMUSG00000029319	Coq2	coenzyme Q2 4-hydroxybenzoate polyprenyltransferase
chr19	53331836	53332536	701	*	248	1.648	7.34707	2.14097e-25	merged_common	288.229	91.9686	Intron (ENSMUST00000003870.13/17859, intron 2 of 5)	19	53330446	53375810	45365	1	17859	ENSMUST00000111737.1	1390	ENSMUSG00000025025	Mxi1	MAX interactor 1, dimerization protein
chr6	48432637	48434519	1883	*	974	-1.49768	7.61902	2.34993e-25	merged_common	116.985	330.352	3' UTR	6	48427697	48444036	16340	2	68910	ENSMUST00000114566.7	9517	ENSMUSG00000068551	Zfp467	zinc finger protein 467
chr12	45011122	45012264	1143	*	552	-1.86682	6.9795	2.63848e-25	merged_common	66.0776	241.003	Promoter	12	44861365	45012964	151600	2	217517	ENSMUST00000130202.1	700	ENSMUSG00000046314	Stxbp6	syntaxin binding protein 6 (amisyn)
chr15	38384060	38385424	1365	*	863	1.16497	8.33099	2.66661e-25	merged_common	482.196	215.047	Exon (ENSMUST00000181144.1/ENSMUST00000181144.1, exon 1 of 2)	15	38299874	38300706	833	2	21847	ENSMUST00000228416.1	-83354	ENSMUSG00000037465	Klf10	Kruppel-like factor 10
chr17	79298648	79299404	757	*	483	1.50124	7.60837	2.69177e-25	merged_common	328.327	115.981	Distal Intergenic	17	79335197	79353007	17811	2	260409	ENSMUST00000233363.1	53603	ENSMUSG00000036533	Cdc42ep3	CDC42 effector protein (Rho GTPase binding) 3
chr19	10279563	10280225	663	*	312	1.61095	7.40214	2.75373e-25	merged_common	295.623	96.7819	Intron (ENSMUST00000039327.10/269060, intron 1 of 19)	19	10253330	10256871	3542	2	269060	ENSMUST00000156361.1	-22692	ENSMUSG00000035735	Dagla	diacylglycerol lipase, alpha
chr3	130321510	130322725	1216	*	587	-1.33126	7.94831	2.93454e-25	merged_common	155.706	391.791	Intron (ENSMUST00000143830.2/77018, intron 2 of 19)	3	130180891	130599877	418987	1	77018	ENSMUST00000106353.1	140619	ENSMUSG00000058897	Col25a1	collagen, type XXV, alpha 1
chr6	136463369	136465269	1901	*	1234	-1.48897	7.62744	3.02558e-25	merged_common	118.026	331.284	Distal Intergenic	6	136506167	136566758	60592	1	54343	ENSMUST00000203988.2	-40898	ENSMUSG00000030213	Atf7ip	activating transcription factor 7 interacting protein
chr16	30024332	30025268	937	*	527	1.83101	7.04024	3.12015e-25	merged_common	248.266	69.7797	Intron (ENSMUST00000232465.1/71528, intron 3 of 3)	16	30021842	30039479	17638	2	71528	ENSMUST00000232465.1	14211	ENSMUSG00000116660	9030404E10Rik	RIKEN cDNA 9030404E10 gene
chr15	9570339	9572882	2544	*	1748	-1.05668	8.60332	3.6771e-25	merged_common	269.657	560.923	Distal Intergenic	15	9516409	9530176	13768	2	16197	ENSMUST00000228673.1	-40163	ENSMUSG00000003882	Il7r	interleukin 7 receptor
chr15	100421158	100421777	620	*	198	2.80459	5.79599	3.82542e-25	ATAC_PL_unique	146.859	21.0201	Promoter	15	100422147	100427475	5329	1	432982	ENSMUST00000132119.1	-370	ENSMUSG00000087444	Gm5475	predicted gene 5475
chr10	98804748	98805572	825	*	488	-1.5123	7.57384	4.03303e-25	merged_common	112.805	321.793	Distal Intergenic	10	98914406	98987122	72717	1	67972	ENSMUST00000219557.1	-108834	ENSMUSG00000019943	Atp2b1	ATPase, Ca++ transporting, plasma membrane 1
chr19	9930924	9931988	1065	*	360	1.95324	6.83853	4.08784e-25	merged_common	225.214	58.1582	Distal Intergenic	19	9872297	9899533	27237	2	16319	ENSMUST00000025562.7	-31391	ENSMUSG00000024660	Incenp	inner centromere protein
chr4	155487471	155488657	1187	*	535	1.89053	6.92275	5.00224e-25	merged_common	233.619	63.009	Distal Intergenic	4	155491361	155559269	67909	1	14688	ENSMUST00000165335.7	-2704	ENSMUSG00000029064	Gnb1	guanine nucleotide binding protein (G protein), beta 1
chr2	144300546	144301499	954	*	705	2.64594	5.96463	5.11874e-25	merged_common	156.238	24.962	Distal Intergenic	2	144270941	144280516	9576	1	74528	ENSMUST00000110027.1	29605	ENSMUSG00000027424	Mgme1	mitochondrial genome maintenance exonuclease 1
chr17	63072379	63074094	1716	*	470	-2.12451	6.60152	5.31444e-25	merged_common	46.5034	202.78	Intron (ENSMUST00000024761.12/50758, intron 8 of 8)	17	62604184	62881317	277134	2	13640	ENSMUST00000076840.11	-191062	ENSMUSG00000048915	Efna5	ephrin A5
chr11	87758093	87761467	3375	*	1691	2.0982	6.61801	5.31444e-25	merged_common	203.25	47.4689	Promoter	11	87760541	87785928	25388	1	207777	ENSMUST00000039627.11	0	ENSMUSG00000034156	Tspoap1	TSPO associated protein 1
chr7	137267256	137268019	764	*	341	-1.91383	6.88554	5.60119e-25	merged_common	60.9108	229.517	Promoter	7	137195884	137267538	71655	2	13593	ENSMUST00000209578.1	0	ENSMUSG00000010476	Ebf3	early B cell factor 3
chr2	101796116	101798191	2076	*	970	1.25558	8.08834	5.77451e-25	merged_common	420.549	176.136	Promoter	2	101714285	101797707	83423	2	72446	ENSMUST00000171088.7	0	ENSMUSG00000032841	Prr5l	proline rich 5 like
chr10	18886636	18887509	874	*	548	-1.84433	6.99052	6.06456e-25	merged_common	67.1053	240.966	Exon (ENSMUST00000214387.1/ENSMUST00000214387.1, exon 1 of 3)	10	18845020	18857073	12054	1	64058	ENSMUST00000019998.8	41616	ENSMUSG00000019851	Perp	PERP, TP53 apoptosis effector
chr8	73677252	73678251	1000	*	301	-1.33615	7.92122	6.70639e-25	merged_common	152.551	385.155	Distal Intergenic	8	72814599	73353540	538942	2	16795	ENSMUST00000212459.1	-323712	ENSMUSG00000004383	Large1	LARGE xylosyl- and glucuronyltransferase 1
chr8	84656426	84657210	785	*	603	2.88453	5.69374	6.98559e-25	ATAC_PL_unique	140.654	19.0468	Distal Intergenic	8	84661331	84662852	1522	2	15936	ENSMUST00000060427.4	5642	ENSMUSG00000053560	Ier2	immediate early response 2
chr5	53454121	53455565	1445	*	645	1.3535	7.88181	7.07702e-25	merged_common	377.036	147.55	Distal Intergenic	5	53466152	53649390	183239	1	19664	ENSMUST00000201991.3	-10587	ENSMUSG00000039191	Rbpj	recombination signal binding protein for immunoglobulin kappa J region
chr14	30457257	30458594	1338	*	789	1.58779	7.41906	7.3621e-25	merged_common	296.719	98.7128	Intron (ENSMUST00000112250.4/12289, intron 1 of 46)	14	30479535	30510494	30960	1	75901	ENSMUST00000224453.1	-20941	ENSMUSG00000021962	Dcp1a	decapping mRNA 1A
chr13	34254505	34255840	1336	*	900	-1.87786	6.93907	7.40873e-25	merged_common	64.0062	235.242	Intron (ENSMUST00000148390.2/73102, intron 3 of 9)	13	34182867	34193531	10665	2	73102	ENSMUST00000128392.1	-60974	ENSMUSG00000038267	Slc22a23	solute carrier family 22, member 23
chr7	118478744	118479619	876	*	528	1.52394	7.52117	7.82448e-25	merged_common	311.511	108.323	Distal Intergenic	7	118485111	118491975	6865	2	319622	ENSMUST00000178344.2	12356	ENSMUSG00000095115	Itpripl2	inositol 1,4,5-triphosphate receptor interacting protein-like 2
chr12	35391902	35392892	991	*	462	-1.53739	7.51809	7.82448e-25	merged_common	107.59	312.299	Distal Intergenic	12	35514406	35526779	12374	2	11622	ENSMUST00000173414.1	133887	ENSMUSG00000019256	Ahr	aryl-hydrocarbon receptor
chr3	136325395	136326709	1315	*	670	-0.80027	9.36937	7.99432e-25	merged_common	501.197	872.799	Promoter	3	136053363	136326046	272684	2	242248	ENSMUST00000196159.4	0	ENSMUSG00000037922	Bank1	B cell scaffold protein with ankyrin repeats 1
chr2	30711610	30712533	924	*	587	2.02851	6.69696	8.21817e-25	merged_common	209.559	51.3647	Distal Intergenic	2	30721210	30721293	84	1	100526499	ENSMUST00000175350.1	-8677	ENSMUSG00000093091	Mir3089	microRNA 3089
chr8	84661179	84665562	4384	*	2966	1.47526	7.63083	8.4157e-25	merged_common	330.489	118.867	Promoter	8	84661331	84662852	1522	2	15936	ENSMUST00000060427.4	0	ENSMUSG00000053560	Ier2	immediate early response 2
chr2	167924610	167927112	2503	*	562	1.16172	8.29737	8.54072e-25	merged_common	470.558	210.33	Distal Intergenic	2	167932057	167974737	42681	1	19246	ENSMUST00000147210.7	-4945	ENSMUSG00000027540	Ptpn1	protein tyrosine phosphatase, non-receptor type 1
chr6	129591402	129591978	577	*	342	-2.1176	6.59799	8.63066e-25	merged_common	46.501	201.801	Promoter	6	129591782	129598469	6688	1	16643	ENSMUST00000032268.13	0	ENSMUSG00000030165	Klrd1	killer cell lectin-like receptor, subfamily D, member 1
chr1	58726715	58727700	986	*	679	1.49999	7.57169	8.8323e-25	merged_common	319.946	113.119	Exon (ENSMUST00000140940.7/12633, exon 3 of 10)	1	58730552	58752453	21902	1	12633	ENSMUST00000123032.1	-2852	ENSMUSG00000026031	Cflar	CASP8 and FADD-like apoptosis regulator
chr5	113672408	113672967	560	*	201	2.83285	5.7409	9.14087e-25	merged_common	142.748	20.0353	Distal Intergenic	5	113612354	113650426	38073	2	14747	ENSMUST00000047936.12	-21982	ENSMUSG00000042190	Cmklr1	chemokine-like receptor 1
chr2	167352488	167353000	513	*	271	2.92919	5.63922	9.23347e-25	ATAC_PL_unique	137.55	18.0587	Distal Intergenic	2	167298444	167349183	50740	2	56336	ENSMUST00000109221.8	-3305	ENSMUSG00000017929	B4galt5	UDP-Gal:betaGlcNAc beta 1,4-galactosyltransferase, polypeptide 5
chr14	114863429	114870283	6855	*	1862	-1.09091	8.48373	9.26902e-25	merged_common	245.278	522.463	Distal Intergenic	14	114831965	114861327	29363	1	75822	ENSMUST00000226121.1	31464	ENSMUSG00000115320	4930524C18Rik	RIKEN cDNA 4930524C18 gene
chr11	109368977	109369701	725	*	320	1.31783	7.92796	1.17362e-24	merged_common	384.509	154.241	Intron (ENSMUST00000106702.3/14674, intron 2 of 2)	11	109354778	109363654	8877	2	100036768	ENSMUST00000070956.3	-5323	ENSMUSG00000056687	Gm11696	predicted gene 11696
chr7	111663019	111664535	1517	*	454	-1.451	7.65844	1.18865e-24	merged_common	122.186	334.055	Intron (ENSMUST00000049430.14/233733, intron 1 of 10)	7	111471661	111779977	308317	2	233733	ENSMUST00000049430.14	115442	ENSMUSG00000038296	Galnt18	polypeptide N-acetylgalactosaminyltransferase 18
chr6	38145327	38146448	1122	*	551	-1.10371	8.44589	1.20633e-24	merged_common	237.871	511.2	Promoter	6	38126020	38147374	21355	2	330286	ENSMUST00000144973.4	926	ENSMUSG00000063455	D630045J12Rik	RIKEN cDNA D630045J12 gene
chr12	117480948	117481431	484	*	253	2.56533	6.03389	1.21828e-24	ATAC_PL_unique	159.405	26.9315	Distal Intergenic	12	117516479	117759737	243259	1	217944	ENSMUST00000109691.3	-35048	ENSMUSG00000041992	Rapgef5	Rap guanine nucleotide exchange factor (GEF) 5
chr11	117880779	117883166	2388	*	1302	1.82054	7.01507	1.27684e-24	merged_common	243.089	68.8221	Intron (ENSMUST00000125607.1/ENSMUST00000125607.1, intron 3 of 3)	11	117867952	117873481	5530	2	71776	ENSMUST00000153989.1	-7298	ENSMUSG00000017713	Tha1	threonine aldolase 1
chr11	4237142	4238126	985	*	500	2.17835	6.50185	1.3753e-24	merged_common	192.809	42.5969	Promoter	11	4236420	4241026	4607	1	18413	ENSMUST00000075221.2	722	ENSMUSG00000058755	Osm	oncostatin M
chr16	92620725	92621533	809	*	155	3.04114	5.52764	1.53105e-24	ATAC_PL_unique	132.35	16.0786	Intron (ENSMUST00000023673.13/12394, intron 6 of 7)	16	92686758	92695495	8738	2	12394	ENSMUST00000187242.2	73962	ENSMUSG00000022952	Runx1	runt related transcription factor 1
chr13	51848550	51849975	1426	*	586	1.67122	7.24911	1.61506e-24	merged_common	271.483	85.2424	Distal Intergenic	13	51846744	51848224	1481	1	23882	ENSMUST00000132480.1	1806	ENSMUSG00000021453	Gadd45g	growth arrest and DNA-damage-inducible 45 gamma
chr2	125695775	125696932	1158	*	690	1.38842	7.7726	1.70106e-24	merged_common	353.805	135.147	Intron (ENSMUST00000042246.13/271849, intron 1 of 11)	2	125627447	125673632	46186	2	271849	ENSMUST00000110480.7	-22143	ENSMUSG00000035109	Shc4	SHC (Src homology 2 domain containing) family, member 4
chr10	96370304	96371711	1408	*	871	0.99978	8.71547	1.72544e-24	merged_common	594.429	297.26	Distal Intergenic	10	96226207	96248708	22502	1	74881	ENSMUST00000218720.1	144097	ENSMUSG00000112762	4930459C07Rik	RIKEN cDNA 4930459C07 gene
chr15	9564189	9566047	1859	*	1543	-1.96736	6.78463	1.79533e-24	merged_common	55.7519	218.019	Distal Intergenic	15	9516409	9530176	13768	2	16197	ENSMUST00000228673.1	-34013	ENSMUSG00000003882	Il7r	interleukin 7 receptor
chr7	84385678	84387262	1585	*	935	-1.57828	7.40689	1.873e-24	merged_common	98.2067	293.259	Intron (ENSMUST00000085077.4/11864, intron 1 of 18)	7	84347436	84372658	25223	2	11864	ENSMUST00000208863.1	-13020	ENSMUSG00000015709	Arnt2	aryl hydrocarbon receptor nuclear translocator 2
chr8	14675003	14676331	1329	*	717	-0.97608	8.77875	1.92232e-24	merged_common	313.15	616.001	Intron (ENSMUST00000152652.7/244310, intron 3 of 14)	8	14742753	14760902	18150	1	244310	ENSMUST00000137130.1	-66422	ENSMUSG00000047495	Dlgap2	DLG associated protein 2
chr11	68457986	68458698	713	*	267	1.9775	6.75123	1.9414e-24	merged_common	213.78	54.2849	Intron (ENSMUST00000021283.7/320207, intron 1 of 18)	11	68473795	68496249	22455	1	320207	ENSMUST00000126876.7	-15097	ENSMUSG00000020901	Pik3r5	phosphoinositide-3-kinase regulatory subunit 5
chr5	125052021	125053109	1089	*	385	1.87119	6.91327	1.95184e-24	merged_common	230.539	63.0172	Intron (ENSMUST00000111402.8/20602, intron 18 of 47)	5	125047802	125055988	8187	2	20602	ENSMUST00000149968.1	2879	ENSMUSG00000029478	Ncor2	nuclear receptor co-repressor 2
chr3	121721475	121722433	959	*	381	2.25318	6.40055	2.03904e-24	merged_common	184.457	38.6919	Exon (ENSMUST00000197391.1/ENSMUST00000197391.1, exon 1 of 1)	3	121723537	121735048	11512	1	14066	ENSMUST00000029771.12	-1104	ENSMUSG00000028128	F3	coagulation factor III
chr2	167765012	167765581	570	*	245	2.86348	5.68343	2.16817e-24	ATAC_PL_unique	138.637	19.0496	Distal Intergenic	2	167691181	167697801	6621	1	329562	ENSMUST00000130679.1	73831	ENSMUSG00000006462	A530013C23Rik	RIKEN cDNA A530013C23 gene
chr10	80158095	80161107	3013	*	1890	1.14575	8.31523	2.18833e-24	merged_common	473.79	214.132	3' UTR	10	80165985	80170316	4332	1	12696	ENSMUST00000154726.7	-4878	ENSMUSG00000045193	Cirbp	cold inducible RNA binding protein
chr10	121590422	121591878	1457	*	898	-0.97987	8.76587	2.42304e-24	merged_common	309.959	611.329	Intron (ENSMUST00000039810.7/73192, intron 24 of 24)	10	121546455	121586787	40333	2	56480	ENSMUST00000020316.3	-3635	ENSMUSG00000020115	Tbk1	TANK-binding kinase 1
chr10	69254050	69255127	1078	*	606	-1.26107	8.03418	2.53284e-24	merged_common	169.324	405.825	Intron (ENSMUST00000164034.7/69288, intron 4 of 10)	10	69265637	69270209	4573	1	69288	ENSMUST00000169569.1	-10510	ENSMUSG00000019944	Rhobtb1	Rho-related BTB domain containing 1
chr12	54397002	54399661	2660	*	1290	-1.32185	7.91392	2.80148e-24	merged_common	152.535	381.316	Distal Intergenic	12	54388042	54391318	3277	2	665239	ENSMUST00000223334.1	-5684	NA	Gm7550	predicted gene 7550
chr17	46879705	46880379	675	*	314	2.81209	5.73074	2.8117e-24	ATAC_PL_unique	140.73	20.0384	Distal Intergenic	17	46890684	46891847	1164	1	72726	ENSMUST00000040434.8	-10305	ENSMUSG00000036430	Tbcc	tubulin-specific chaperone C
chr8	126803688	126804780	1093	*	569	1.48576	7.56472	2.845e-24	merged_common	316.838	113.13	Distal Intergenic	8	126839233	126851473	12241	1	414091	ENSMUST00000212914.1	-34453	NA	A630001O12Rik	RIKEN cDNA A630001O12 gene
chr11	97658849	97660922	2074	*	763	1.5601	7.4332	2.87934e-24	merged_common	296.78	100.646	Exon (ENSMUST00000134427.1/ENSMUST00000134427.1, exon 1 of 4)	11	97663414	97685463	22050	1	246198	ENSMUST00000044730.11	-2492	ENSMUSG00000038437	Mllt6	myeloid/lymphoid or mixed-lineage leukemia; translocated to, 6
chr7	134519150	134520216	1067	*	484	-1.87157	6.91228	3.06717e-24	merged_common	62.9657	230.411	Distal Intergenic	7	134354303	134385661	31359	2	71007	ENSMUST00000174271.1	-133489	ENSMUSG00000030994	D7Ertd443e	DNA segment, Chr 7, ERATO Doi 443, expressed
chr1	91080047	91081146	1100	*	520	1.25031	8.05436	3.10023e-24	merged_common	410.01	172.351	Intron (ENSMUST00000189505.6/16978, intron 6 of 12)	1	91053586	91128287	74702	1	16978	ENSMUST00000189617.2	26461	ENSMUSG00000026305	Lrrfip1	leucine rich repeat (in FLII) interacting protein 1
chr17	26533589	26534297	709	*	459	2.24511	6.3966	3.36487e-24	merged_common	183.439	38.6942	Distal Intergenic	17	26505590	26508519	2930	2	19252	ENSMUST00000025025.6	-25070	ENSMUSG00000024190	Dusp1	dual specificity phosphatase 1
chr1	58722098	58723205	1108	*	436	2.09831	6.58832	3.6759e-24	merged_common	199.117	46.5002	Exon (ENSMUST00000123553.1/12633, exon 2 of 2)	1	58730552	58752453	21902	1	12633	ENSMUST00000123032.1	-7347	ENSMUSG00000026031	Cflar	CASP8 and FADD-like apoptosis regulator
chr13	94263872	94264492	621	*	319	2.96657	5.57678	3.7836e-24	merged_common	133.442	17.0712	Promoter	13	94225023	94265146	40124	2	107767	ENSMUST00000138255.1	654	ENSMUSG00000021687	Scamp1	secretory carrier membrane protein 1
chr8	56312027	56314778	2752	*	1813	-1.1636	8.26209	3.78533e-24	merged_common	205.115	459.49	Exon (ENSMUST00000209271.1/ENSMUST00000209271.1, exon 1 of 1)	8	56294585	56321043	26459	1	15446	ENSMUST00000034026.9	17442	ENSMUSG00000031613	Hpgd	hydroxyprostaglandin dehydrogenase 15 (NAD)
chr5	139363877	139366812	2936	*	978	1.16167	8.26456	4.42297e-24	merged_common	459.97	205.604	Exon (ENSMUST00000066052.11/73212, exon 3 of 5)	5	139369650	139369745	96	2	723898	ENSMUST00000083659.1	2933	ENSMUSG00000065593	Mir339	microRNA 339
chr9	85568550	85569517	968	*	513	-1.10857	8.38927	4.84439e-24	merged_common	228.331	492.355	Distal Intergenic	9	85708168	85718538	10371	2	108837	ENSMUST00000188768.1	149021	ENSMUSG00000035941	Ibtk	inhibitor of Bruton agammaglobulinemia tyrosine kinase
chr2	116922601	116923131	531	*	380	1.98731	6.7037	5.31529e-24	merged_common	207.556	52.3474	Distal Intergenic	2	116900194	116904557	4364	1	320975	ENSMUST00000155323.1	22407	ENSMUSG00000085316	D330050G23Rik	RIKEN cDNA D330050G23 gene
chr13	76395485	76396644	1160	*	631	-1.37104	7.78154	5.49134e-24	merged_common	136.809	353.866	Intron (ENSMUST00000125209.7/78771, intron 1 of 20)	13	76384535	77031810	647276	1	78771	ENSMUST00000125209.7	10950	ENSMUSG00000021596	Mctp1	multiple C2 domains, transmembrane 1
chr10	13836893	13838286	1394	*	940	1.36115	7.79933	5.83329e-24	merged_common	357.031	138.982	Intron (ENSMUST00000162610.7/66253, intron 1 of 5)	10	13653588	13844286	190699	2	66253	ENSMUST00000162174.7	6000	ENSMUSG00000019806	Aig1	androgen-induced 1
chr5	142896566	142903412	6847	*	4965	2.19059	6.44056	5.83904e-24	merged_common	185.575	40.6523	3' UTR	5	142882419	142895421	13003	2	231863	ENSMUST00000156725.1	-1145	ENSMUSG00000066640	Fbxl18	F-box and leucine-rich repeat protein 18
chr2	164454579	164455373	795	*	437	2.13815	6.51464	6.03256e-24	merged_common	191.834	43.5791	Distal Intergenic	2	164456976	164465512	8537	1	66460	ENSMUST00000109352.7	-1603	ENSMUSG00000045503	Sys1	SYS1 Golgi-localized integral membrane protein homolog (S. cerevisiae)
chr11	76845367	76847381	2015	*	443	2.38889	6.18752	6.20227e-24	merged_common	166.799	31.8468	Promoter	11	76778424	76847018	68595	2	12874	ENSMUST00000021201.5	0	ENSMUSG00000020841	Cpd	carboxypeptidase D
chr2	127322593	127323309	717	*	486	3.3814	5.1649	6.53668e-24	ATAC_PL_unique	115.809	11.1132	Distal Intergenic	2	127336159	127338376	2218	1	13537	ENSMUST00000028846.6	-12850	ENSMUSG00000027368	Dusp2	dual specificity phosphatase 2
chr18	4277986	4278764	779	*	592	2.95553	5.57137	6.70959e-24	ATAC_PL_unique	132.434	17.0725	Distal Intergenic	18	4333845	4335048	1204	2	26410	ENSMUST00000173708.1	56284	ENSMUSG00000024235	Map3k8	mitogen-activated protein kinase kinase kinase 8
chr16	23980975	23981743	769	*	482	2.50468	6.05557	6.91808e-24	merged_common	158.453	27.9201	Intron (ENSMUST00000023151.5/12053, intron 1 of 9)	16	23965052	23988852	23801	2	12053	ENSMUST00000023151.5	7109	ENSMUSG00000022508	Bcl6	B cell leukemia/lymphoma 6
chr2	85154184	85155087	904	*	192	-1.44264	7.62919	7.26605e-24	merged_common	120.081	326.403	Distal Intergenic	2	85136225	85139923	3699	1	23796	ENSMUST00000057019.8	17959	ENSMUSG00000044338	Aplnr	apelin receptor
chr13	120299045	120300788	1744	*	380	-1.44259	7.61651	8.38673e-24	merged_common	119.033	323.541	Promoter	13	120300392	120308779	8388	1	625360	ENSMUST00000225029.1	0	ENSMUSG00000094796	BC147527	cDNA sequence BC147527
chr16	89870964	89872738	1775	*	721	-1.30207	7.9236	8.41383e-24	merged_common	154.618	381.261	Intron (ENSMUST00000163370.7/21844, intron 6 of 27)	16	89787111	89857817	70707	2	21844	ENSMUST00000114122.7	-13147	ENSMUSG00000002489	Tiam1	T cell lymphoma invasion and metastasis 1
chr7	80404022	80404611	590	*	263	2.24905	6.36183	8.84276e-24	merged_common	179.315	37.7212	Promoter	7	80398641	80403322	4682	2	18550	ENSMUST00000147150.1	-700	ENSMUSG00000030530	Furin	furin (paired basic amino acid cleaving enzyme)
chr13	25882618	25883762	1145	*	315	-2.065	6.60282	9.45778e-24	merged_common	47.5153	198.82	Distal Intergenic	13	25921033	25966316	45284	2	100503530	ENSMUST00000139335.2	82554	ENSMUSG00000086531	Gm11351	predicted gene 11351
chr10	22353636	22354572	937	*	409	2.16455	6.46185	9.70423e-24	merged_common	186.641	41.6307	Intron (ENSMUST00000178026.1/19370, intron 5 of 5)	10	22360552	22374139	13588	1	56554	ENSMUST00000182677.7	-5980	ENSMUSG00000078452	Raet1d	retinoic acid early transcript delta
chr10	126497895	126500643	2749	*	984	-1.33079	7.84707	9.8128e-24	merged_common	145.178	365.18	Distal Intergenic	10	126710282	126710391	110	2	102465224	ENSMUST00000184232.1	209748	ENSMUSG00000098756	Mir378d	microRNA 378d
chr13	3525396	3527015	1620	*	1026	-0.81787	9.23881	9.88712e-24	merged_common	455.048	802.159	Distal Intergenic	13	3538063	3567871	29809	1	14569	ENSMUST00000223396.1	-11048	ENSMUSG00000021218	Gdi2	guanosine diphosphate (GDP) dissociation inhibitor 2
chr13	43806198	43808644	2447	*	1360	4.03518	4.62869	1.05134e-23	ATAC_PL_unique	100.168	6.10969	Distal Intergenic	13	43785185	43803128	17944	1	12522	ENSMUST00000221359.1	21013	ENSMUSG00000015396	Cd83	CD83 antigen
chr4	7457220	7458033	814	*	465	-2.28749	6.28196	1.27754e-23	merged_common	35.2174	171.933	Distal Intergenic	4	7560688	7573801	13114	1	71510	ENSMUST00000129988.1	-102655	ENSMUSG00000086070	8430436N08Rik	RIKEN cDNA 8430436N08 gene
chr5	115491741	115492315	575	*	278	2.58816	5.93634	1.32471e-23	ATAC_PL_unique	150.167	24.9724	Exon (ENSMUST00000121159.2/ENSMUST00000121159.2, exon 1 of 1)	5	115478010	115484725	6716	2	75387	ENSMUST00000112066.1	-7016	ENSMUSG00000029524	Sirt4	sirtuin 4
chr9	121635865	121637073	1209	*	594	-1.99977	6.68989	1.3594e-23	merged_common	51.6253	206.468	5' UTR	9	121578049	121641498	63450	2	69032	ENSMUST00000213757.1	4425	ENSMUSG00000032530	Lyzl4	lysozyme-like 4
chr16	76109800	76111583	1784	*	773	-0.80078	9.28683	1.49543e-23	merged_common	473.244	824.411	Distal Intergenic	16	76122613	76156086	33474	1	78215	ENSMUST00000232455.1	-11030	ENSMUSG00000116695	4930578N18Rik	RIKEN cDNA 4930578N18 gene
chr2	167774804	167776291	1488	*	664	1.20183	8.13021	1.49755e-23	merged_common	424.943	184.733	Distal Intergenic	2	167691181	167697801	6621	1	329562	ENSMUST00000130679.1	83623	ENSMUSG00000006462	A530013C23Rik	RIKEN cDNA A530013C23 gene
chr4	135313341	135314361	1021	*	626	2.03197	6.61471	1.52397e-23	merged_common	198.184	48.4601	Distal Intergenic	4	135322033	135353136	31104	2	51796	ENSMUST00000030613.10	38775	ENSMUSG00000028809	Srrm1	serine/arginine repetitive matrix 1
chr15	67101006	67101759	754	*	444	1.60335	7.29483	1.67689e-23	merged_common	273.71	90.0812	Downstream (1-2kb)	15	67102875	67113992	11118	2	20442	ENSMUST00000092640.5	12233	ENSMUSG00000013846	St3gal1	ST3 beta-galactoside alpha-2,3-sialyltransferase 1
chr19	9938378	9939520	1143	*	584	1.95371	6.71366	2.086e-23	merged_common	206.574	53.3274	Distal Intergenic	19	9872297	9899533	27237	2	16319	ENSMUST00000025562.7	-38845	ENSMUSG00000024660	Incenp	inner centromere protein
chr1	191894396	191894947	552	*	157	1.95371	6.71366	2.086e-23	merged_common	206.574	53.3274	Exon (ENSMUST00000139827.7/98736, exon 5 of 5)	1	191890233	191899256	9024	2	98736	ENSMUST00000140401.1	4309	ENSMUSG00000055833	1700034H15Rik	RIKEN cDNA 1700034H15 gene
chr2	45195989	45198856	2868	*	1572	-0.94347	8.80566	2.26483e-23	merged_common	322.672	620.546	Distal Intergenic	2	44983632	45117395	133764	2	24136	ENSMUST00000176438.8	-78594	ENSMUSG00000026872	Zeb2	zinc finger E-box binding homeobox 2
chr18	75455050	75456140	1091	*	350	1.8726	6.84614	2.27153e-23	merged_common	220.165	60.1228	Intron (ENSMUST00000165559.1/269037, intron 10 of 11)	18	75514645	75522806	8162	1	100038353	ENSMUST00000181913.1	-58505	ENSMUSG00000097712	Gm10532	predicted gene 10532
chr7	19822159	19824701	2543	*	1787	1.22787	8.04338	2.39888e-23	merged_common	403.749	172.38	Promoter	7	19808462	19822770	14309	2	12051	ENSMUST00000120537.7	0	ENSMUSG00000053175	Bcl3	B cell leukemia/lymphoma 3
chr10	37106184	37106753	570	*	299	2.13132	6.47882	2.59532e-23	merged_common	186.687	42.6112	Distal Intergenic	10	37133375	37138920	5546	2	17118	ENSMUST00000092584.5	32167	ENSMUSG00000069662	Marcks	myristoylated alanine rich protein kinase C substrate
chr2	150569814	150570998	1185	*	495	1.73539	7.07085	2.71565e-23	merged_common	245.324	73.6776	Promoter	2	150570415	150578944	8530	1	13011	ENSMUST00000089200.2	0	ENSMUSG00000068129	Cst7	cystatin F (leukocystatin)
chr14	103826003	103827352	1350	*	558	-1.32912	7.82516	2.74778e-23	merged_common	143.072	359.468	Intron (ENSMUST00000022718.10/13618, intron 2 of 7)	14	103814728	103843695	28968	2	13618	ENSMUST00000227824.1	16343	ENSMUSG00000022122	Ednrb	endothelin receptor type B
chr19	5929593	5930572	980	*	91	4.21859	4.46092	2.96957e-23	ATAC_PL_unique	95.0237	5.10399	Distal Intergenic	19	5917556	5924816	7261	2	104252	ENSMUST00000055458.4	-4777	ENSMUSG00000045664	Cdc42ep2	CDC42 effector protein (Rho GTPase binding) 2
chr16	57336067	57338308	2242	*	797	-0.99056	8.65252	3.20137e-23	merged_common	285.479	567.234	Intron (ENSMUST00000114371.4/66497, intron 1 of 9)	16	57353093	57573126	220034	1	78749	ENSMUST00000159816.7	-14785	ENSMUSG00000043336	Filip1l	filamin A interacting protein 1-like
chr1	180847920	180849267	1348	*	981	1.61681	7.25458	3.60389e-23	merged_common	267.424	87.1951	Distal Intergenic	1	180851127	180868113	16987	1	208768	ENSMUST00000038091.7	-1860	ENSMUSG00000038806	Sde2	SDE2 telomere maintenance homolog (S. pombe)
chr1	186855474	186855958	485	*	276	-1.88271	6.81967	3.80738e-23	merged_common	58.8233	216.921	Distal Intergenic	1	186720978	186749358	28381	2	67223	ENSMUST00000001339.5	-106116	ENSMUSG00000001305	Rrp15	ribosomal RNA processing 15 homolog (S. cerevisiae)
chr3	84714790	84715533	744	*	410	1.87543	6.82418	3.80738e-23	merged_common	217.052	59.1565	Intron (ENSMUST00000154148.7/99889, intron 3 of 9)	3	84690223	84692544	2322	1	320782	ENSMUST00000128344.1	24567	ENSMUSG00000056498	Tmem154	transmembrane protein 154
chr18	65697371	65698839	1469	*	388	2.24473	6.32204	3.8359e-23	merged_common	174.176	36.7501	Promoter	18	65698268	65751537	53270	1	319888	ENSMUST00000115097.7	0	ENSMUSG00000046610	Oacyl	O-acyltransferase like
chr3	68676745	68677579	835	*	449	1.21119	8.07435	4.04481e-23	merged_common	410.132	177.141	Distal Intergenic	3	68690644	68698547	7904	1	16159	ENSMUST00000029345.11	-13065	ENSMUSG00000027776	Il12a	interleukin 12a
chr2	169519755	169520543	789	*	411	-1.62623	7.23457	4.04998e-23	merged_common	85.7138	264.603	Distal Intergenic	2	169633013	169913093	280081	1	228911	ENSMUST00000109159.2	-112470	ENSMUSG00000047907	Tshz2	teashirt zinc finger family member 2
chr1	174235657	174236742	1086	*	475	-2.15459	6.41089	4.13451e-23	merged_common	40.3248	179.543	Intron (ENSMUST00000027817.7/20739, intron 42 of 51)	1	174249889	174250976	1088	2	258710	ENSMUST00000061990.4	14234	ENSMUSG00000050788	Olfr419	olfactory receptor 419
chr13	40938021	40940437	2417	*	547	1.72927	7.06785	4.17138e-23	merged_common	244.296	73.6807	Intron (ENSMUST00000110191.9/14538, intron 1 of 2)	13	40946732	40953820	7089	1	14538	ENSMUST00000223570.1	-6295	ENSMUSG00000021360	Gcnt2	glucosaminyl (N-acetyl) transferase 2, I-branching enzyme
chr17	27825601	27826797	1197	*	631	1.59663	7.27609	4.28373e-23	merged_common	269.549	89.126	Distal Intergenic	17	27753207	27820648	67442	2	224647	ENSMUST00000233131.1	-4953	ENSMUSG00000056692	Ilrun	inflammation and lipid regulator with UBA-like and NBR1-like domains
chr2	119337420	119338292	873	*	656	1.41129	7.64508	4.49769e-23	merged_common	326.452	122.738	Distal Intergenic	2	119328538	119332153	3616	1	54485	ENSMUST00000127102.1	8882	ENSMUSG00000027314	Dll4	delta like canonical Notch ligand 4
chr6	99007270	99008147	878	*	423	-1.92191	6.76141	4.54557e-23	merged_common	55.7328	211.185	Exon (ENSMUST00000113321.6/108655, exon 5 of 5)	6	98952201	99003680	51480	2	108655	ENSMUST00000142164.1	-3590	ENSMUSG00000030067	Foxp1	forkhead box P1
chr14	16597674	16598967	1294	*	520	-1.24376	7.99813	4.56361e-23	merged_common	166.139	393.443	Intron (ENSMUST00000223976.1/218772, intron 2 of 3)	14	16431337	16575827	144491	2	218772	ENSMUST00000225921.1	-21847	ENSMUSG00000017491	Rarb	retinoic acid receptor, beta
chr6	50306277	50307395	1119	*	513	-1.23597	8.01234	4.62401e-23	merged_common	168.237	396.266	Intron (ENSMUST00000114468.8/71720, intron 18 of 21)	6	50295183	50300354	5172	2	71720	ENSMUST00000141466.1	-5923	ENSMUSG00000029822	Osbpl3	oxysterol binding protein-like 3
chr5	112254221	112256147	1927	*	1417	-1.69577	7.10305	5.23553e-23	merged_common	76.3822	247.44	Promoter	5	112255815	112269585	13771	1	12960	ENSMUST00000031286.12	0	ENSMUSG00000029343	Crybb1	crystallin, beta B1
chr3	103400793	103401987	1195	*	647	-1.29067	7.87794	5.36287e-23	merged_common	150.394	367.927	Distal Intergenic	3	103341682	103355563	13882	1	94093	ENSMUST00000197365.1	59111	ENSMUSG00000033014	Trim33	tripartite motif-containing 33
chr6	57641456	57642106	651	*	523	-1.3709	7.70177	5.56357e-23	merged_common	129.456	334.815	Intron (ENSMUST00000031817.9/67138, intron 13 of 22)	6	57610826	57619928	9103	1	67138	ENSMUST00000204166.1	30630	ENSMUSG00000029798	Herc6	hect domain and RLD 6
chr10	62553380	62554060	681	*	374	2.71151	5.75042	5.70461e-23	ATAC_PL_unique	137.775	21.0342	Intron (ENSMUST00000159704.7/72320, intron 7 of 7)	10	62559599	62563578	3980	2	72320	ENSMUST00000162263.1	9518	ENSMUSG00000036955	Kif1bp	KIF1 binding protein
chr3	121547628	121548569	942	*	417	2.25765	6.28966	6.10381e-23	merged_common	171.075	35.7739	Distal Intergenic	3	121459528	121532404	72877	2	213603	ENSMUST00000039197.8	-15224	ENSMUSG00000039865	Slc44a3	solute carrier family 44, member 3
chr1	13454288	13455250	963	*	501	2.55839	5.92176	6.65453e-23	merged_common	147.131	24.9776	Distal Intergenic	1	13164501	13374083	209583	2	17978	ENSMUST00000147927.7	-80205	ENSMUSG00000005886	Ncoa2	nuclear receptor coactivator 2
chr1	148902638	148904819	2182	*	608	-1.12788	8.25865	6.67223e-23	merged_common	207.176	452.756	Distal Intergenic	1	149886184	149902199	16016	2	18783	ENSMUST00000155438.1	997380	ENSMUSG00000056220	Pla2g4a	phospholipase A2, group IVA (cytosolic, calcium-dependent)
chr2	174343636	174344596	961	*	746	-1.55262	7.34699	6.84989e-23	merged_common	95.0543	278.841	Promoter	2	174344650	174345728	1079	1	14683	ENSMUST00000129534.1	-54	ENSMUSG00000027523	Gnas	GNAS (guanine nucleotide binding protein, alpha stimulating) complex locus
chr15	93913068	93914276	1209	*	632	-1.76932	6.97437	7.28507e-23	merged_common	68.106	232.169	Intron (ENSMUST00000230109.1/77248, intron 2 of 3)	15	93904856	93927111	22256	2	77248	ENSMUST00000230109.1	12835	ENSMUSG00000116360	9430014N10Rik	RIKEN cDNA 9430014N10 gene
chr2	30440862	30442334	1473	*	1077	1.93188	6.70297	8.39659e-23	merged_common	203.504	53.3357	Promoter	2	30441853	30447131	5279	1	110854	ENSMUST00000131476.7	0	ENSMUSG00000039515	Ptpa	protein phosphatase 2 protein activator
chr7	137593527	137594381	855	*	263	-2.30732	6.20536	8.72744e-23	merged_common	33.1675	164.167	Distal Intergenic	7	137437689	137442169	4481	1	620016	ENSMUST00000211598.1	155838	ENSMUSG00000100863	Gm12669	glutaredoxin 3 pseudogene
chr2	144246865	144248397	1533	*	670	-0.92924	8.81263	9.1568e-23	merged_common	325.838	620.484	Downstream (1-2kb)	2	144251116	144252677	1562	2	69178	ENSMUST00000125285.1	4280	ENSMUSG00000027423	Snx5	sorting nexin 5
chr6	56759774	56761077	1304	*	1048	-1.99656	6.62928	9.52572e-23	merged_common	49.5564	197.754	3' UTR	6	56740913	56754052	13140	1	78937	ENSMUST00000176560.1	18861	ENSMUSG00000029787	Avl9	AVL9 cell migration associated
chr13	64397756	64398574	819	*	478	2.4573	6.03237	9.69716e-23	ATAC_PL_unique	153.386	27.9295	Distal Intergenic	13	64359337	64370890	11554	2	13039	ENSMUST00000222517.1	-26866	ENSMUSG00000021477	Ctsl	cathepsin L
chr9	24511775	24512914	1140	*	442	-1.43788	7.56238	9.96525e-23	merged_common	114.837	311.118	Distal Intergenic	9	24411803	24503140	91338	2	244745	ENSMUST00000170356.1	-8635	ENSMUSG00000043067	Dpy19l1	dpy-19-like 1 (C. elegans)
chr4	89485764	89486542	779	*	326	2.01528	6.57741	1.04488e-22	merged_common	192.012	47.4972	Distal Intergenic	4	89421848	89463487	41640	1	102633081	ENSMUST00000139272.1	63916	NA	Gm12610	predicted gene 12610
chr8	60867290	60869123	1834	*	668	-1.63	7.20097	1.16619e-22	merged_common	83.6312	258.85	Distal Intergenic	8	60890418	60907575	17158	1	72612	ENSMUST00000146863.1	-21295	ENSMUSG00000038005	Hpf1	histone PARylation factor 1
chr12	71437583	71439006	1424	*	849	-1.51456	7.40473	1.17228e-22	merged_common	100.249	286.424	Intron (ENSMUST00000221650.1/ENSMUST00000221650.1, intron 5 of 5)	12	71488285	71556133	67849	1	73815	ENSMUST00000222756.1	-49279	ENSMUSG00000113630	4930404H11Rik	RIKEN cDNA 4930404H11 gene
chr15	103304026	103309683	5658	*	1362	1.03733	8.48537	1.23615e-22	merged_common	513.434	250.16	Promoter	15	103308235	103310612	2378	2	80910	ENSMUST00000079824.5	929	ENSMUSG00000063234	Gpr84	G protein-coupled receptor 84
chr13	112987290	112988387	1098	*	498	1.4166	7.59048	1.36792e-22	merged_common	314.907	117.962	Promoter	13	112987802	112990777	2976	1	218630	ENSMUST00000038404.5	0	ENSMUSG00000042417	Ccno	cyclin O
chr15	79891496	79894389	2894	*	847	1.60437	7.23253	1.39043e-22	merged_common	262.235	86.2436	Promoter	15	79891659	79905547	13889	1	80287	ENSMUST00000177350.7	0	ENSMUSG00000009585	Apobec3	apolipoprotein B mRNA editing enzyme, catalytic polypeptide 3
chr11	117979262	117979956	695	*	377	2.73707	5.69401	1.39527e-22	ATAC_PL_unique	133.671	20.0492	Distal Intergenic	11	117986292	118024011	37720	1	74451	ENSMUST00000132676.7	-6336	ENSMUSG00000017715	Pgs1	phosphatidylglycerophosphate synthase 1
chr5	121400145	121400539	395	*	188	3.07816	5.35712	1.40524e-22	ATAC_PL_unique	119.114	14.1041	Intron (ENSMUST00000042163.14/231713, intron 1 of 23)	5	121398005	121439931	41927	1	231713	ENSMUST00000151458.3	2140	ENSMUSG00000042719	Naa25	N(alpha)-acetyltransferase 25, NatB auxiliary subunit
chr2	97504685	97505438	754	*	398	-1.59013	7.26785	1.45384e-22	merged_common	88.8183	267.411	Intron (ENSMUST00000135431.7/241568, intron 5 of 6)	2	97468089	97629063	160975	1	241568	ENSMUST00000170144.1	36596	ENSMUSG00000050587	Lrrc4c	leucine rich repeat containing 4C
chr4	34527678	34529163	1486	*	462	-1.7943	6.9196	1.45957e-22	merged_common	65.0037	225.463	Distal Intergenic	4	34550937	34566908	15972	1	433693	ENSMUST00000084299.5	-21774	ENSMUSG00000028291	Akirin2	akirin 2
chr3	88509638	88510455	818	*	419	1.95556	6.66125	1.46068e-22	merged_common	199.332	51.3919	5' UTR	3	88481846	88503337	21492	2	16905	ENSMUST00000135494.3	-6301	ENSMUSG00000028063	Lmna	lamin A
chr15	78257090	78259163	2074	*	1263	1.32243	7.78038	1.50459e-22	merged_common	347.675	139.022	Intron (ENSMUST00000096357.11/17972, intron 7 of 9)	15	78255452	78260802	5351	1	17972	ENSMUST00000146147.1	1638	ENSMUSG00000071715	Ncf4	neutrophil cytosolic factor 4
chr10	37720534	37721616	1083	*	396	-2.24608	6.2608	1.60316e-22	merged_common	35.2063	167.016	Distal Intergenic	10	38175780	38181903	6124	1	75877	ENSMUST00000215643.1	-454164	ENSMUSG00000111234	4930591E09Rik	RIKEN cDNA 4930591E09 gene
chr14	55713163	55714074	912	*	477	1.88456	6.75619	1.78932e-22	merged_common	207.716	56.255	Promoter	14	55700009	55713492	13484	2	21816	ENSMUST00000168729.7	0	ENSMUSG00000022218	Tgm1	transglutaminase 1, K polypeptide
chr2	50164542	50165310	769	*	229	-2.11821	6.4287	1.81515e-22	merged_common	41.3437	179.496	Promoter	2	50165401	50173694	8294	1	320343	ENSMUST00000126337.1	-91	ENSMUSG00000050447	Lypd6	LY6/PLAUR domain containing 6
chr9	23569834	23571190	1357	*	531	-1.05409	8.42696	1.83673e-22	merged_common	238.842	495.934	Distal Intergenic	9	23373932	23406831	32900	1	73230	ENSMUST00000214050.1	195902	ENSMUSG00000031963	Bmper	BMP-binding endothelial regulator
chr1	36307143	36308906	1764	*	757	0.8603	9.00727	1.92571e-22	merged_common	693.34	381.918	Promoter	1	36307733	36319203	11471	1	214855	ENSMUST00000126413.7	0	ENSMUSG00000037447	Arid5a	AT rich interactive domain 5A (MRF1-like)
chr10	95414290	95418184	3895	*	2531	1.64494	7.13529	2.05596e-22	merged_common	248.613	79.4965	Promoter	10	95412420	95414827	2408	2	216233	ENSMUST00000134918.1	0	ENSMUSG00000020027	Socs2	suppressor of cytokine signaling 2
chr19	10946872	10947787	916	*	569	2.3516	6.12441	2.13047e-22	merged_common	157.609	30.8802	Promoter	19	10941481	10947332	5852	2	108673	ENSMUST00000133836.1	0	ENSMUSG00000024732	Ccdc86	coiled-coil domain containing 86
chr8	114142406	114143368	963	*	524	-2.34713	6.13354	2.13047e-22	merged_common	31.1244	158.364	Intron (ENSMUST00000073521.11/67528, intron 2 of 3)	8	114133642	114148388	14747	1	67528	ENSMUST00000134593.1	8764	ENSMUSG00000031767	Nudt7	nudix (nucleoside diphosphate linked moiety X)-type motif 7
chr6	129401638	129403061	1424	*	977	-1.63938	7.16937	2.22161e-22	merged_common	81.5538	254.066	Promoter	6	129403550	129409335	5786	1	56760	ENSMUST00000133061.1	-489	ENSMUSG00000030159	Clec1b	C-type lectin domain family 1, member b
chr10	40514958	40516165	1208	*	637	-1.78812	6.91645	2.26485e-22	merged_common	65.001	224.49	Distal Intergenic	10	40570336	40604132	33797	1	70840	ENSMUST00000078314.13	-54171	ENSMUSG00000019834	Slc22a16	solute carrier family 22 (organic cation transporter), member 16
chr18	67973568	67974222	655	*	360	2.32541	6.15644	2.27933e-22	merged_common	159.692	31.8613	Intron (ENSMUST00000063775.3/52662, intron 1 of 5)	18	67933257	68255549	322293	1	52662	ENSMUST00000063775.3	40311	ENSMUSG00000024544	Ldlrad4	low density lipoprotein receptor class A domain containing 4
chr15	79347068	79348562	1495	*	376	2.32541	6.15644	2.27933e-22	merged_common	159.692	31.8613	Promoter	15	79347520	79359076	11557	1	17133	ENSMUST00000096350.10	0	ENSMUSG00000042622	Maff	v-maf musculoaponeurotic fibrosarcoma oncogene family, protein F (avian)
chr8	8958771	8960250	1480	*	660	-1.34118	7.73266	2.29482e-22	merged_common	133.627	338.556	Distal Intergenic	8	9125412	9132288	6877	2	71249	ENSMUST00000208031.1	172038	ENSMUSG00000108848	4933430N04Rik	RIKEN cDNA 4933430N04 gene
chr11	69395254	69398488	3235	*	362	1.38616	7.64395	2.476e-22	merged_common	323.367	123.714	Promoter	11	69391925	69395631	3707	2	327951	ENSMUST00000134903.1	0	ENSMUSG00000044795	Cyb5d1	cytochrome b5 domain containing 1
chr6	134700466	134701531	1066	*	582	1.3192	7.76888	2.51644e-22	merged_common	344.529	138.072	Promoter	6	134701550	134710455	8906	1	67774	ENSMUST00000204133.1	-19	ENSMUSG00000042992	Borcs5	BLOC-1 related complex subunit 5
chr13	40968216	40969509	1294	*	634	1.04269	8.44944	2.57298e-22	merged_common	501.736	243.554	Intron (ENSMUST00000153685.1/102633880, intron 1 of 4)	13	40953415	40958228	4814	1	14538	ENSMUST00000225996.1	14801	ENSMUSG00000021360	Gcnt2	glucosaminyl (N-acetyl) transferase 2, I-branching enzyme
chr6	123122528	123123853	1326	*	740	-1.13588	8.20257	2.58959e-22	merged_common	198.725	436.703	Promoter	6	123122688	123127976	5289	1	26888	ENSMUST00000161636.7	0	ENSMUSG00000030148	Clec4a2	C-type lectin domain family 4, member a2
chr11	115075189	115075837	649	*	352	2.43791	6.02288	2.76878e-22	ATAC_PL_unique	151.359	27.9335	Distal Intergenic	11	115051917	115062177	10261	2	217306	ENSMUST00000062787.7	-13012	ENSMUSG00000048498	Cd300e	CD300E molecule
chr8	106499751	106500625	875	*	410	1.48068	7.44814	2.81751e-22	merged_common	291.728	104.532	Exon (ENSMUST00000066875.7/ENSMUST00000066875.7, exon 1 of 3)	8	106510891	106557297	46407	1	12560	ENSMUST00000080797.7	-10266	ENSMUSG00000061048	Cdh3	cadherin 3
chr1	134073170	134076060	2891	*	1241	2.56505	5.86735	2.87798e-22	ATAC_PL_unique	142.013	23.9977	3' UTR	1	134075170	134079120	3951	2	12227	ENSMUST00000020692.6	3060	ENSMUSG00000020423	Btg2	B cell translocation gene 2, anti-proliferative
chr11	116615067	116617370	2304	*	841	1.61267	7.18759	2.98908e-22	merged_common	254.924	83.3584	Intron (ENSMUST00000103029.9/217344, intron 1 of 18)	11	116598165	116624200	26036	2	217344	ENSMUST00000103029.9	6830	ENSMUSG00000020806	Rhbdf2	rhomboid 5 homolog 2
chr8	57800932	57801881	950	*	386	1.44442	7.50747	2.9934e-22	merged_common	300.179	110.298	Intron (ENSMUST00000204128.2/270049, intron 11 of 12)	8	57776225	57796590	20366	2	270049	ENSMUST00000204067.2	-4342	ENSMUSG00000096914	Galntl6	UDP-N-acetyl-alpha-D-galactosamine:polypeptide N-acetylgalactosaminyltransferase-like 6
chr1	62228722	62229772	1051	*	597	-1.33081	7.74986	3.44445e-22	merged_common	135.717	341.387	Intron (ENSMUST00000075374.9/72823, intron 13 of 22)	1	62131195	62136109	4915	2	105243940	ENSMUST00000127498.2	-92613	NA	Pard3bos2	par-3 family cell polarity regulator beta, opposite strand 2
chr16	44992956	44994137	1182	*	548	-1.47974	7.43139	3.72034e-22	merged_common	103.359	288.267	Distal Intergenic	16	44965254	44966854	1601	1	74603	ENSMUST00000163358.1	27702	ENSMUSG00000036172	Cd200r3	CD200 receptor 3
chr7	81854617	81855373	757	*	507	1.437	7.51628	3.79275e-22	merged_common	301.242	111.259	Distal Intergenic	7	81859001	81884071	25071	1	107769	ENSMUST00000041890.7	-3628	ENSMUSG00000038623	Tm6sf1	transmembrane 6 superfamily member 1
chr5	59995772	59997879	2108	*	1007	-0.62708	9.87853	3.96135e-22	merged_common	757.441	1169.82	Exon (ENSMUST00000197494.1/ENSMUST00000197494.1, exon 1 of 1)	5	59963119	59986004	22886	2	71057	ENSMUST00000197579.4	-9768	ENSMUSG00000106013	4933402J10Rik	RIKEN cDNA 4933402J10 gene
chr14	48421683	48422725	1043	*	586	1.74536	6.95794	4.14431e-22	merged_common	227.642	67.8962	Distal Intergenic	14	48446124	48520368	74245	1	218989	ENSMUST00000227440.1	-23399	ENSMUSG00000036339	Tmem260	transmembrane protein 260
chr5	85914739	85916287	1549	*	466	-1.46514	7.45283	4.14465e-22	merged_common	105.439	291.106	Distal Intergenic	5	86057116	86065522	8407	2	12617	ENSMUST00000199141.1	149235	ENSMUSG00000029253	Cenpc1	centromere protein C1
chr19	42017352	42018341	990	*	666	2.26735	6.21366	4.20971e-22	merged_common	162.843	33.8242	Intron (ENSMUST00000026170.1/226122, intron 1 of 2)	19	42036038	42045110	9073	1	56642	ENSMUST00000026172.2	-17697	ENSMUSG00000025172	Ankrd2	ankyrin repeat domain 2 (stretch responsive muscle)
chr17	24006915	24007945	1031	*	449	1.52509	7.34576	4.39563e-22	merged_common	275.958	95.8838	Distal Intergenic	17	23993534	23998100	4567	2	70835	ENSMUST00000041649.7	-8815	ENSMUSG00000045027	Prss22	protease, serine 22
chr17	50504110	50504786	677	*	487	2.81836	5.58496	4.6775e-22	ATAC_PL_unique	127.481	18.0732	Distal Intergenic	17	50509403	50688484	179082	1	224860	ENSMUST00000043938.7	-4617	ENSMUSG00000038910	Plcl2	phospholipase C-like 2
chr13	91451042	91452760	1719	*	598	-1.47001	7.44094	4.76727e-22	merged_common	104.397	289.204	Distal Intergenic	13	91460283	91688866	228584	1	66970	ENSMUST00000156547.7	-7523	ENSMUSG00000003992	Ssbp2	single-stranded DNA binding protein 2
chr12	35037950	35040261	2312	*	766	-1.22339	7.9693	4.85e-22	merged_common	164.006	382.945	Distal Intergenic	12	35047186	35068874	21689	1	217463	ENSMUST00000221831.1	-6925	ENSMUSG00000020590	Snx13	sorting nexin 13
chr8	78716721	78717967	1247	*	495	-1.76528	6.92763	4.9758e-22	merged_common	66.0273	224.453	Intron (ENSMUST00000209490.1/76775, intron 8 of 9)	8	78697174	78728576	31403	1	76775	ENSMUST00000210132.1	19547	ENSMUSG00000031684	Slc10a7	solute carrier family 10 (sodium/bile acid cotransporter family), member 7
chr16	7543616	7544681	1066	*	597	-1.67842	7.05434	5.36957e-22	merged_common	74.2917	237.791	Distal Intergenic	16	7352970	7409969	57000	1	268859	ENSMUST00000231031.1	190646	ENSMUSG00000008658	Rbfox1	RNA binding protein, fox-1 homolog (C. elegans) 1
chr16	87602929	87603659	731	*	406	3.1201	5.27296	5.5897e-22	ATAC_PL_unique	114.009	13.1129	Distal Intergenic	16	87553330	87595336	42007	1	224419	ENSMUST00000026700.7	49599	ENSMUSG00000025610	Map3k7cl	Map3k7 C-terminal like
chr11	119874860	119875379	520	*	202	2.75348	5.62958	5.91973e-22	merged_common	128.562	19.0648	Intron (ENSMUST00000026671.12/74370, intron 24 of 33)	11	119857444	119884967	27524	1	74370	ENSMUST00000131217.1	17416	ENSMUSG00000025583	Rptor	regulatory associated protein of MTOR, complex 1
chr4	119105607	119106153	547	*	251	2.62431	5.77345	6.16646e-22	merged_common	135.825	22.0284	Distal Intergenic	4	119108711	119137983	29273	1	20525	ENSMUST00000030398.9	-2558	ENSMUSG00000028645	Slc2a1	solute carrier family 2 (facilitated glucose transporter), member 1
chr6	129405631	129405879	249	*	175	-2.24612	6.2181	6.96632e-22	ATAC_PP_unique	34.179	162.147	Exon (ENSMUST00000133061.1/56760, exon 2 of 2)	6	129403550	129409335	5786	1	56760	ENSMUST00000133061.1	2081	ENSMUSG00000030159	Clec1b	C-type lectin domain family 1, member b
chr1	171046506	171052358	5853	*	4509	1.79964	6.85599	7.00936e-22	merged_common	216.138	62.0849	3' UTR	1	171051174	171058054	6881	2	14131	ENSMUST00000168817.1	5696	ENSMUSG00000059498	Fcgr3	Fc receptor, IgG, low affinity III
chr11	83662159	83662895	737	*	231	2.0281	6.52356	7.13919e-22	merged_common	185.8	45.5541	Promoter	11	83662584	83664683	2100	1	20303	ENSMUST00000019074.3	0	ENSMUSG00000018930	Ccl4	chemokine (C-C motif) ligand 4
chr17	17004290	17005599	1310	*	674	-0.74484	9.3717	7.32058e-22	merged_common	511.745	857.576	Distal Intergenic	17	17064113	17089628	25516	1	449000	ENSMUST00000127027.1	-58514	ENSMUSG00000096696	Zfp960	zinc finger protein 960
chr11	115119419	115120230	812	*	222	2.04304	6.49982	7.33422e-22	merged_common	183.717	44.5792	Exon (ENSMUST00000146254.1/246746, exon 3 of 3)	11	115120357	115126791	6435	2	246746	ENSMUST00000149335.1	6561	ENSMUSG00000047798	Cd300lf	CD300 molecule like family member F
chr3	148248191	148249000	810	*	610	-1.41977	7.53991	7.59721e-22	merged_common	113.774	304.394	Distal Intergenic	3	148815856	148822979	7124	2	99633	ENSMUST00000168352.1	573979	ENSMUSG00000028184	Adgrl2	adhesion G protein-coupled receptor L2
chr14	73179098	73179687	590	*	241	-2.12806	6.36002	7.79138e-22	merged_common	39.2873	171.736	Intron (ENSMUST00000164822.7/105670, intron 14 of 14)	14	73174451	73182682	8232	1	105670	ENSMUST00000170278.1	4647	ENSMUSG00000022106	Rcbtb2	regulator of chromosome condensation (RCC1) and BTB (POZ) domain containing protein 2
chr5	64412023	64412927	905	*	493	2.11671	6.40438	7.79697e-22	merged_common	176.403	40.6737	Distal Intergenic	5	64454813	64467943	13131	2	69999	ENSMUST00000189767.2	55016	ENSMUSG00000100911	1700027F09Rik	RIKEN cDNA 1700027F09 gene
chr11	100952168	100952770	603	*	203	3.04086	5.33886	8.03078e-22	ATAC_PL_unique	116.105	14.1079	Distal Intergenic	11	100886810	100939540	52731	2	20848	ENSMUST00000127638.7	-12628	ENSMUSG00000004040	Stat3	signal transducer and activator of transcription 3
chr2	52605269	52606651	1383	*	882	-1.67257	7.05136	8.19204e-22	merged_common	74.2889	236.82	Intron (ENSMUST00000178799.7/12298, intron 2 of 13)	2	52428325	52558567	130243	2	12298	ENSMUST00000102761.8	-46702	ENSMUSG00000017412	Cacnb4	calcium channel, voltage-dependent, beta 4 subunit
chr11	109425171	109426645	1475	*	704	0.85946	8.96019	8.70084e-22	merged_common	670.884	369.764	Promoter	11	109425946	109438148	12203	1	13929	ENSMUST00000092500.10	0	ENSMUSG00000020610	Amz2	archaelysin family metallopeptidase 2
chr4	125124186	125125632	1447	*	833	1.15086	8.12727	8.78689e-22	merged_common	416.652	187.642	Intron (ENSMUST00000036188.7/230738, intron 2 of 5)	4	125120094	125122520	2427	2	230738	ENSMUST00000131685.1	-1666	ENSMUSG00000042677	Zc3h12a	zinc finger CCCH type containing 12A
chr12	80853596	80854301	706	*	221	1.72504	6.96832	8.91927e-22	merged_common	227.676	68.8698	Intron (ENSMUST00000220238.1/217684, intron 3 of 6)	12	80790559	80880835	90277	1	217684	ENSMUST00000068519.6	63037	ENSMUSG00000021133	Susd6	sushi domain containing 6
chr10	88356769	88357622	854	*	426	1.24555	7.88365	1.06383e-21	merged_common	363.655	153.37	Promoter	10	88322804	88356996	34193	2	71712	ENSMUST00000156097.1	0	ENSMUSG00000020057	Dram1	DNA-damage regulated autophagy modulator 1
chr15	67116594	67117361	768	*	259	1.99183	6.56593	1.06659e-21	merged_common	188.948	47.5052	Intron (ENSMUST00000229028.1/20442, intron 3 of 8)	15	67102875	67113992	11118	2	20442	ENSMUST00000092640.5	-2602	ENSMUSG00000013846	St3gal1	ST3 beta-galactoside alpha-2,3-sialyltransferase 1
chr6	120173785	120175246	1462	*	757	0.90837	8.79288	1.10394e-21	merged_common	607.637	323.741	Intron (ENSMUST00000112711.8/29862, intron 1 of 3)	6	120193823	120200334	6512	1	29862	ENSMUST00000035244.5	-18577	ENSMUSG00000041377	Ninj2	ninjurin 2
chr4	24584764	24585543	780	*	305	-2.01193	6.51162	1.1786e-21	merged_common	45.4326	183.239	Intron (ENSMUST00000108222.8/212377, intron 17 of 23)	4	24578848	24591208	12361	1	212377	ENSMUST00000123984.2	5916	ENSMUSG00000045751	Mms22l	MMS22-like, DNA repair protein
chr11	79076323	79077132	810	*	338	2.03492	6.49585	1.1786e-21	merged_common	182.697	44.582	Intron (ENSMUST00000018478.10/16706, intron 1 of 18)	11	79030625	79074486	43862	2	16706	ENSMUST00000208969.1	-1837	ENSMUSG00000018334	Ksr1	kinase suppressor of ras 1
chr15	3269939	3271934	1996	*	759	-0.80304	9.13995	1.28774e-21	merged_common	427.1	745.193	Promoter	15	3270767	3280508	9742	1	20363	ENSMUST00000082424.10	0	ENSMUSG00000064373	Selenop	selenoprotein P
chr2	170351385	170352021	637	*	435	3.02821	5.33267	1.43318e-21	ATAC_PL_unique	115.102	14.1092	Intron (ENSMUST00000154650.7/76960, intron 5 of 6)	2	170348089	170349795	1707	2	76960	ENSMUST00000152461.1	-1590	ENSMUSG00000013523	Bcas1	breast carcinoma amplified sequence 1
chr18	56733775	56734445	671	*	251	2.79516	5.5736	1.43389e-21	ATAC_PL_unique	125.468	18.0762	Intron (ENSMUST00000025486.8/16906, intron 5 of 10)	18	56728441	56733456	5016	1	16906	ENSMUST00000128651.1	5334	ENSMUSG00000024590	Lmnb1	lamin B1
chr1	144282918	144284621	1704	*	577	-1.08209	8.29307	1.53702e-21	merged_common	215.572	456.387	Distal Intergenic	1	144242296	144249242	6947	2	50778	ENSMUST00000189061.6	-33676	ENSMUSG00000026358	Rgs1	regulator of G-protein signaling 1
chr5	93239705	93240525	821	*	356	-1.35466	7.6338	1.54744e-21	merged_common	124.196	317.614	Distal Intergenic	5	93267257	93276231	8975	1	12452	ENSMUST00000031331.12	-26732	ENSMUSG00000029385	Ccng2	cyclin G2
chr2	146010453	146011416	964	*	455	-1.77802	6.86449	1.55207e-21	merged_common	62.9215	215.792	Intron (ENSMUST00000126415.7/ENSMUST00000126415.7, intron 10 of 15)	2	145917479	145935014	17536	2	66877	ENSMUST00000001818.4	-75439	ENSMUSG00000001767	Crnkl1	crooked neck pre-mRNA splicing factor 1
chr3	86740937	86741711	775	*	375	-1.73658	6.93547	1.66355e-21	merged_common	67.0507	223.443	Exon (ENSMUST00000192145.5/80877, exon 50 of 51)	3	86787241	86792315	5075	2	70762	ENSMUST00000192260.1	50604	ENSMUSG00000028078	Dclk2	doublecortin-like kinase 2
chr11	69880551	69881650	1100	*	499	1.36421	7.62203	1.80426e-21	merged_common	316.078	122.779	Promoter	11	69878261	69881406	3146	2	216858	ENSMUST00000050555.4	0	ENSMUSG00000046731	Kctd11	potassium channel tetramerisation domain containing 11
chr3	133626376	133627366	991	*	491	2.26331	6.16951	1.83037e-21	merged_common	157.714	32.8508	Intron (ENSMUST00000193574.1/ENSMUST00000193574.1, intron 1 of 2)	3	133488535	133545139	56605	2	214133	ENSMUST00000197118.4	-81237	ENSMUSG00000040943	Tet2	tet methylcytosine dioxygenase 2
chr18	56737990	56738088	99	*	38	2.012	6.51568	1.83355e-21	ATAC_PL_unique	183.76	45.5595	Intron (ENSMUST00000025486.8/16906, intron 5 of 10)	18	56728441	56733456	5016	1	16906	ENSMUST00000128651.1	9549	ENSMUSG00000024590	Lmnb1	lamin B1
chr4	98097045	98097786	742	*	394	1.85837	6.71836	1.84044e-21	merged_common	200.512	55.2987	Intron (ENSMUST00000075448.12/18027, intron 10 of 10)	4	97911033	98042595	131563	1	18027	ENSMUST00000133011.1	186012	ENSMUSG00000028565	Nfia	nuclear factor I/A
chr2	145887622	145889881	2260	*	1054	-0.79586	9.16142	1.84153e-21	merged_common	434.584	754.486	Distal Intergenic	2	145902099	145912528	10430	1	67877	ENSMUST00000150316.7	-12218	ENSMUSG00000002728	Naa20	N(alpha)-acetyltransferase 20, NatB catalytic subunit
chr10	88798983	88799915	933	*	481	-1.70185	6.98325	1.89853e-21	merged_common	70.1478	228.203	Intron (ENSMUST00000004470.8/70683, intron 19 of 61)	10	88776179	88782666	6488	2	70683	ENSMUST00000219662.1	-16317	ENSMUSG00000004356	Utp20	UTP20 small subunit processome component
chr9	59485539	59487350	1812	*	1247	0.99365	8.52252	1.97344e-21	merged_common	518.912	260.6	Promoter	9	59388258	59486614	98357	2	23806	ENSMUST00000171975.7	0	ENSMUSG00000025234	Arih1	ariadne RBR E3 ubiquitin protein ligase 1
chr13	89888725	89889635	911	*	600	1.19893	7.98077	2.1931e-21	merged_common	382.744	166.722	Intron (ENSMUST00000159199.7/108138, intron 7 of 8)	13	89655312	89742509	87198	2	13003	ENSMUST00000109546.8	-146216	ENSMUSG00000021614	Vcan	versican
chr5	101785870	101786945	1076	*	228	-1.10806	8.20363	2.295e-21	merged_common	200.798	432.831	Intron (ENSMUST00000031273.8/74596, intron 2 of 12)	5	101806548	101821447	14900	1	74596	ENSMUST00000132213.1	-19603	ENSMUSG00000029330	Cds1	CDP-diacylglycerol synthase 1
chr8	8964225	8965375	1151	*	548	-1.93104	6.62559	2.34111e-21	merged_common	50.5651	192.82	Distal Intergenic	8	9125412	9132288	6877	2	71249	ENSMUST00000208031.1	166913	ENSMUSG00000108848	4933430N04Rik	RIKEN cDNA 4933430N04 gene
chr15	78325649	78326304	656	*	291	1.77047	6.86396	2.40321e-21	merged_common	215.149	63.0631	Promoter	15	78325752	78351001	25250	1	12983	ENSMUST00000230264.2	0	ENSMUSG00000071713	Csf2rb	colony stimulating factor 2 receptor, beta, low-affinity (granulocyte-macrophage)
chr2	122651945	122652787	843	*	576	1.77047	6.86396	2.40321e-21	merged_common	215.149	63.0631	Distal Intergenic	2	122640803	122640881	79	1	387165	ENSMUST00000102354.2	11142	ENSMUSG00000076309	Mir147	microRNA 147
chr2	119241880	119244043	2164	*	620	1.21253	7.94575	2.58683e-21	merged_common	375.33	161.959	Intron (ENSMUST00000028783.13/20732, intron 2 of 10)	2	119246373	119248902	2530	1	20732	ENSMUST00000139903.1	-2330	ENSMUSG00000027315	Spint1	serine protease inhibitor, Kunitz type 1
chr16	25057919	25059946	2028	*	1258	1.1992	7.97266	2.59067e-21	merged_common	380.634	165.772	Promoter	16	25059639	25069058	9420	1	319487	ENSMUST00000181655.1	0	ENSMUSG00000096960	A230028O05Rik	RIKEN cDNA A230028O05 gene
chr11	100951946	100952065	120	*	89	3.24977	5.10045	2.61094e-21	ATAC_PL_unique	105.81	11.1237	Distal Intergenic	11	100886810	100939540	52731	2	20848	ENSMUST00000127638.7	-12406	ENSMUSG00000004040	Stat3	signal transducer and activator of transcription 3
chr16	92620466	92620589	124	*	72	3.24977	5.10045	2.61094e-21	ATAC_PL_unique	105.81	11.1237	Intron (ENSMUST00000023673.13/12394, intron 6 of 7)	16	92686758	92695495	8738	2	12394	ENSMUST00000187242.2	74906	ENSMUSG00000022952	Runx1	runt related transcription factor 1
chr8	84974157	84980601	6445	*	5776	0.94609	8.65225	2.80775e-21	merged_common	558.454	289.858	Promoter	8	84976910	84978718	1809	2	16477	ENSMUST00000064922.6	0	ENSMUSG00000052837	Junb	jun B proto-oncogene
chr12	102453188	102454299	1112	*	594	2.27834	6.13339	2.90033e-21	merged_common	154.618	31.8721	Intron (ENSMUST00000222873.1/ENSMUST00000222873.1, intron 1 of 2)	12	102394098	102439813	45716	2	19141	ENSMUST00000021607.8	-13375	ENSMUSG00000021190	Lgmn	legumain
chr1	184617827	184618708	882	*	404	2.27834	6.13339	2.90033e-21	merged_common	154.618	31.8721	Exon (ENSMUST00000192129.1/ENSMUST00000192129.1, exon 1 of 3)	1	184527841	184557691	29851	2	73590	ENSMUST00000188766.1	-60136	ENSMUSG00000101574	1700112H15Rik	RIKEN cDNA 1700112H15 gene
chr3	58469605	58470778	1174	*	566	1.41394	7.49254	2.90055e-21	merged_common	293.967	110.321	Distal Intergenic	3	58417484	58460309	42826	1	72033	ENSMUST00000196049.1	52121	ENSMUSG00000027806	Tsc22d2	TSC22 domain family, member 2
chr19	21126621	21128009	1389	*	871	1.17819	8.0111	3.02566e-21	merged_common	388.076	171.493	Distal Intergenic	19	21272278	21282289	10012	1	22682	ENSMUST00000025659.10	-144269	ENSMUSG00000024750	Zfand5	zinc finger, AN1-type domain 5
chr8	57589026	57590362	1337	*	457	1.53586	7.26178	3.18365e-21	merged_common	261.327	90.1247	Intron (ENSMUST00000034021.11/108150, intron 1 of 11)	8	57526024	57538453	12430	2	108150	ENSMUST00000139417.1	-50573	ENSMUSG00000031608	Galnt7	polypeptide N-acetylgalactosaminyltransferase 7
chrX	167522127	167522849	723	*	592	-2.03235	6.45504	3.20234e-21	merged_common	43.3772	177.443	Exon (ENSMUST00000112146.7/333605, exon 5 of 17)	20	167346322	167382749	36428	2	110639	ENSMUST00000026839.4	-139378	ENSMUSG00000025742	Prps2	phosphoribosyl pyrophosphate synthetase 2
chr6	100483166	100484098	933	*	299	1.80493	6.78966	3.36251e-21	merged_common	206.805	59.1865	Distal Intergenic	6	100527400	100533426	6027	1	73395	ENSMUST00000187986.1	-43302	ENSMUSG00000101553	1700049E22Rik	RIKEN cDNA 1700049E22 gene
chr18	47154850	47155734	885	*	780	-1.92378	6.62188	3.70356e-21	merged_common	50.5623	191.841	Exon (ENSMUST00000234007.1/ENSMUST00000234007.1, exon 1 of 1)	18	47235598	47281195	45598	2	20358	ENSMUST00000123228.7	125461	ENSMUSG00000019647	Sema6a	sema domain, transmembrane domain (TM), and cytoplasmic domain, (semaphorin) 6A
chr4	139493606	139494168	563	*	230	1.82362	6.75092	3.92389e-21	merged_common	202.634	57.2463	Distal Intergenic	4	139480380	139482682	2303	1	69116	ENSMUST00000135534.1	13226	ENSMUSG00000066036	Ubr4	ubiquitin protein ligase E3 component n-recognin 4
chr6	54126238	54127939	1702	*	642	-1.25255	7.82786	3.98781e-21	merged_common	147.195	350.71	Intron (ENSMUST00000046856.13/69993, intron 1 of 12)	6	54097720	54220537	122818	1	69993	ENSMUST00000204410.1	28518	ENSMUSG00000004633	Chn2	chimerin 2
chr17	35776412	35777788	1377	*	673	1.52634	7.27239	4.14801e-21	merged_common	262.388	91.09	Exon (ENSMUST00000172874.1/74601, exon 2 of 3)	17	35772450	35780687	8238	1	74601	ENSMUST00000172874.1	3962	ENSMUSG00000092171	4833427F10Rik	RIKEN cDNA 4833427F10 gene
chr12	34783349	34784543	1195	*	446	-1.20789	7.9333	4.2656e-21	merged_common	160.826	371.507	Intron (ENSMUST00000211752.1/79221, intron 3 of 26)	12	34434313	34906979	472667	2	79221	ENSMUST00000211632.1	122436	ENSMUSG00000004698	Hdac9	histone deacetylase 9
chr3	59219749	59220839	1091	*	475	-1.68962	6.97701	4.44084e-21	merged_common	70.1417	226.257	Promoter	3	59216360	59220259	3900	2	70839	ENSMUST00000170388.5	0	ENSMUSG00000036353	P2ry12	purinergic receptor P2Y, G-protein coupled 12
chr7	28385464	28386857	1394	*	788	0.82078	9.02968	4.52675e-21	merged_common	694.615	393.246	3' UTR	7	28376784	28380253	3470	2	22695	ENSMUST00000051241.6	-5211	ENSMUSG00000044786	Zfp36	zinc finger protein 36
chr1	36309043	36310246	1204	*	721	2.29419	6.0963	4.58055e-21	merged_common	151.523	30.8929	Exon (ENSMUST00000192874.1/ENSMUST00000192874.1, exon 1 of 1)	1	36307779	36316578	8800	1	214855	ENSMUST00000140218.1	1264	ENSMUSG00000037447	Arid5a	AT rich interactive domain 5A (MRF1-like)
chr8	74979728	74981150	1423	*	871	-1.22608	7.89458	4.99237e-21	merged_common	155.583	363.956	Distal Intergenic	8	74993356	75031972	38617	1	70823	ENSMUST00000041759.13	-12206	ENSMUSG00000034518	Hmgxb4	HMG box domain containing 4
chr3	129633914	129634866	953	*	652	-1.59663	7.12899	5.0101e-21	merged_common	80.4865	243.42	3' UTR	3	129678337	129681546	3210	2	13645	ENSMUST00000197250.1	46680	ENSMUSG00000028017	Egf	epidermal growth factor
chr5	64391186	64392061	876	*	419	1.87204	6.67367	5.18126e-21	merged_common	195.319	53.3586	Distal Intergenic	5	64454813	64467943	13131	2	69999	ENSMUST00000189767.2	75882	ENSMUSG00000100911	1700027F09Rik	RIKEN cDNA 1700027F09 gene
chr17	29998336	29999045	710	*	302	3.32822	5.00421	5.4498e-21	ATAC_PL_unique	101.71	10.1267	Exon (ENSMUST00000234271.1/ENSMUST00000234271.1, exon 2 of 4)	17	30004733	30210022	205290	1	21769	ENSMUST00000226208.2	-5688	ENSMUSG00000044477	Zfand3	zinc finger, AN1-type domain 3
chr14	118634999	118636176	1178	*	628	-1.25756	7.80967	5.52228e-21	merged_common	145.099	346.918	Intron (ENSMUST00000036554.13/239273, intron 4 of 30)	14	118483811	118676931	193121	2	239273	ENSMUST00000226703.1	40755	ENSMUSG00000032849	Abcc4	ATP-binding cassette, sub-family C (CFTR/MRP), member 4
chr1	34472397	34474127	1731	*	333	-1.37213	7.56775	5.58958e-21	merged_common	117.922	305.243	Promoter	1	34472720	34475733	3014	1	19253	ENSMUST00000188972.2	0	ENSMUSG00000026126	Ptpn18	protein tyrosine phosphatase, non-receptor type 18
chr4	112287712	112289023	1312	*	866	-1.30418	7.71375	5.68604e-21	merged_common	133.589	329.89	Intron (ENSMUST00000038455.11/195564, intron 6 of 7)	4	112232245	112300468	68224	1	195564	ENSMUST00000170945.1	55467	ENSMUSG00000070868	Skint3	selection and upkeep of intraepithelial T cells 3
chr5	139379790	139381362	1573	*	780	1.19546	7.96255	5.93655e-21	merged_common	377.486	164.828	Promoter	5	139380581	139396415	15835	1	80290	ENSMUST00000051293.7	0	ENSMUSG00000044197	Gpr146	G protein-coupled receptor 146
chr10	82796365	82797394	1030	*	636	1.76464	6.83886	6.2854e-21	merged_common	211.012	62.1008	Distal Intergenic	10	82812123	82824242	12120	1	70003	ENSMUST00000076984.7	-14729	ENSMUSG00000056821	1700028I16Rik	RIKEN cDNA 1700028I16 gene
chr7	16973973	16974546	574	*	250	1.76464	6.83886	6.2854e-21	merged_common	211.012	62.1008	Distal Intergenic	7	16959679	16964607	4929	1	71691	ENSMUST00000038163.7	14294	ENSMUSG00000041141	Pnmal1	PNMA-like 1
chr13	44659783	44660338	556	*	282	3.71276	4.68861	6.31387e-21	ATAC_PL_unique	93.3766	7.12174	Distal Intergenic	13	44729535	44848340	118806	1	16468	ENSMUST00000174068.7	-69197	ENSMUSG00000038518	Jarid2	jumonji, AT rich interactive domain 2
chr3	157626788	157628301	1514	*	760	-1.41773	7.45696	6.56368e-21	merged_common	107.493	287.183	Intron (ENSMUST00000041175.12/19218, intron 2 of 2)	3	157566900	157644756	77857	1	19218	ENSMUST00000173533.1	59888	ENSMUSG00000040016	Ptger3	prostaglandin E receptor 3 (subtype EP3)
chr11	63924110	63924731	622	*	243	2.65803	5.65531	6.6045e-21	ATAC_PL_unique	126.617	20.0606	Distal Intergenic	11	63885792	63922290	36499	2	54710	ENSMUST00000094103.3	-1820	ENSMUSG00000070407	Hs3st3b1	heparan sulfate (glucosamine) 3-O-sulfotransferase 3B1
chr6	122951737	122953558	1822	*	807	-0.82294	9.00565	6.93603e-21	merged_common	386.461	683.653	Promoter	6	122952515	122969875	17361	1	73149	ENSMUST00000117173.7	0	ENSMUSG00000043832	Clec4a3	C-type lectin domain family 4, member a3
chr17	17391658	17392450	793	*	355	-1.5083	7.29231	6.97011e-21	merged_common	92.9356	264.378	Exon (ENSMUST00000181390.2/ENSMUST00000181390.2, exon 4 of 5)	17	17402672	17459387	56716	1	66643	ENSMUST00000115576.2	-10222	ENSMUSG00000047786	Lix1	limb and CNS expressed 1
chr1	119498392	119499289	898	*	363	-1.2142	7.9079	7.01774e-21	merged_common	157.674	365.822	Intron (ENSMUST00000004565.14/64143, intron 1 of 4)	1	119470305	119504794	34490	2	64143	ENSMUST00000004565.14	5505	ENSMUSG00000004451	Ralb	v-ral simian leukemia viral oncogene B
chr13	110902698	110904058	1361	*	682	-0.89219	8.78422	7.01979e-21	merged_common	323.613	600.623	Promoter	13	110903499	110908280	4782	1	75139	ENSMUST00000224654.1	0	ENSMUSG00000114472	Gm38397	predicted gene, 38397
chr9	65579674	65581298	1625	*	597	1.22976	7.85793	8.11861e-21	merged_common	355.279	151.487	Promoter	9	65554384	65580040	25657	2	102595	ENSMUST00000068944.8	0	ENSMUSG00000050721	Plekho2	pleckstrin homology domain containing, family O member 2
chr4	125114670	125117307	2638	*	2012	1.00696	8.44307	8.23465e-21	merged_common	493.378	245.502	Downstream (1-2kb)	4	125120094	125122520	2427	2	230738	ENSMUST00000131685.1	5213	ENSMUSG00000042677	Zc3h12a	zinc finger CCCH type containing 12A
chr11	5505662	5506458	797	*	404	2.23489	6.15559	8.26155e-21	merged_common	154.668	32.8574	Exon (ENSMUST00000149826.1/ENSMUST00000149826.1, exon 3 of 3)	11	5520659	5525893	5235	1	22433	ENSMUST00000063084.15	-14201	ENSMUSG00000020484	Xbp1	X-box binding protein 1
chr16	7150143	7150920	778	*	512	-0.90984	8.72512	8.3194e-21	merged_common	308.73	580.053	Intron (ENSMUST00000230658.1/268859, intron 4 of 11)	16	7193747	7409969	216223	1	268859	ENSMUST00000231194.1	-42827	ENSMUSG00000008658	Rbfox1	RNA binding protein, fox-1 homolog (C. elegans) 1
chr9	21527415	21528373	959	*	572	1.66579	6.99859	8.32835e-21	merged_common	227.778	71.7892	Intron (ENSMUST00000086361.11/382062, intron 1 of 6)	9	21526228	21545331	19104	1	382062	ENSMUST00000076326.6	1187	ENSMUSG00000057191	AB124611	cDNA sequence AB124611
chr17	10370170	10372113	1944	*	657	-1.01517	8.40708	8.59879e-21	merged_common	238.773	482.594	Distal Intergenic	17	10324602	10329307	4706	1	76634	ENSMUST00000188715.1	45568	ENSMUSG00000099384	1700110C19Rik	RIKEN cDNA 1700110C19 gene
chrX	56416137	56416897	761	*	338	-2.04619	6.39191	8.66173e-21	merged_common	41.3213	170.663	Distal Intergenic	20	56454857	56507840	52984	1	236790	ENSMUST00000134138.1	-37960	ENSMUSG00000035967	Ints6l	integrator complex subunit 6 like
chr6	17642276	17643689	1414	*	705	1.56924	7.1496	8.85249e-21	merged_common	244.59	82.4233	Intron (ENSMUST00000148694.7/12343, intron 2 of 5)	6	17637113	17660810	23698	1	12343	ENSMUST00000152005.2	5163	ENSMUSG00000015733	Capza2	capping protein (actin filament) muscle Z-line, alpha 2
chr18	36708181	36709472	1292	*	995	1.74947	6.85368	8.86502e-21	merged_common	212.073	63.0727	Distal Intergenic	18	36684923	36695925	11003	2	240216	ENSMUST00000115682.1	-12256	ENSMUSG00000044719	E230025N22Rik	Riken cDNA E230025N22 gene
chr5	143579726	143580291	566	*	186	2.10954	6.33022	8.87671e-21	merged_common	167.149	38.7319	Distal Intergenic	5	143549040	143551933	2894	1	67238	ENSMUST00000198994.1	30686	ENSMUSG00000118332	Fam220a	family with sequence similarity 220, member A
chr18	8637682	8638555	874	*	508	1.64144	7.04357	9.02161e-21	merged_common	233.017	74.6903	Distal Intergenic	18	9212163	9218136	5974	1	14370	ENSMUST00000041080.6	-573608	ENSMUSG00000036904	Fzd8	frizzled class receptor 8
chr3	131698120	131698984	865	*	136	1.64144	7.04357	9.02161e-21	merged_common	233.017	74.6903	Distal Intergenic	3	131564935	131583200	18266	1	23971	ENSMUST00000196638.1	133185	ENSMUSG00000028032	Papss1	3'-phosphoadenosine 5'-phosphosulfate synthase 1
chr13	20206809	20208736	1928	*	411	-1.41291	7.4545	9.56232e-21	merged_common	107.489	286.215	5' UTR	13	20185207	20209211	24005	1	140580	ENSMUST00000221067.1	21602	ENSMUSG00000041112	Elmo1	engulfment and cell motility 1
chr5	123897061	123898232	1172	*	496	1.41028	7.45274	9.56232e-21	merged_common	285.606	107.456	Distal Intergenic	5	123907175	123928835	21661	1	68184	ENSMUST00000023869.14	-8943	ENSMUSG00000023106	Denr	density-regulated protein
chr9	45298707	45299928	1222	*	756	1.38916	7.5052	9.59094e-21	merged_common	294.022	112.254	Distal Intergenic	9	45319100	45347581	28482	1	214531	ENSMUST00000034597.7	-19172	ENSMUSG00000037129	Tmprss13	transmembrane protease, serine 13
chr19	43666856	43667658	803	*	363	2.39873	5.95232	9.71927e-21	merged_common	142.191	26.9639	Exon (ENSMUST00000046038.7/246696, exon 2 of 4)	19	43663822	43674881	11060	2	246696	ENSMUST00000046038.7	7223	ENSMUSG00000040414	Slc25a28	solute carrier family 25, member 28
chr3	138026047	138026839	793	*	544	-1.29289	7.71928	9.79262e-21	merged_common	134.628	329.863	Distal Intergenic	3	138048761	138067388	18628	2	329763	ENSMUST00000053318.3	40549	ENSMUSG00000049349	Gm5105	predicted gene 5105
chr6	95359514	95360961	1448	*	795	0.87787	8.81099	1.02584e-20	merged_common	608.842	331.314	Distal Intergenic	6	95290577	95333993	43417	2	414067	ENSMUST00000159937.7	-25521	ENSMUSG00000068180	AY512915	cDNA sequence AY512915
chr5	140616240	140618495	2256	*	1649	1.03881	8.33725	1.02596e-20	merged_common	463.574	225.635	Downstream (2-3kb)	5	140611685	140614674	2990	1	16848	ENSMUST00000199848.1	4555	ENSMUSG00000029570	Lfng	LFNG O-fucosylpeptide 3-beta-N-acetylglucosaminyltransferase
chr16	55600722	55601516	795	*	437	-1.50306	7.28963	1.03087e-20	merged_common	92.9318	263.409	Distal Intergenic	16	55494731	55494797	67	1	100628589	ENSMUST00000175551.1	105991	ENSMUSG00000093292	Mir5118	microRNA 5118
chr18	47268882	47270055	1174	*	555	-1.26796	7.77256	1.05756e-20	merged_common	140.905	339.329	Intron (ENSMUST00000123228.7/20358, intron 4 of 4)	18	47235598	47281195	45598	2	20358	ENSMUST00000123228.7	11140	ENSMUSG00000019647	Sema6a	sema domain, transmembrane domain (TM), and cytoplasmic domain, (semaphorin) 6A
chr11	110426767	110427518	752	*	571	2.80399	5.49718	1.0592e-20	ATAC_PL_unique	119.36	17.0912	Intron (ENSMUST00000020949.11/26399, intron 1 of 11)	11	110399259	110513641	114383	1	26399	ENSMUST00000146084.7	27508	ENSMUSG00000020623	Map2k6	mitogen-activated protein kinase kinase 6
chr2	129362844	129365072	2229	*	1173	3.41865	4.89964	1.10485e-20	ATAC_PL_unique	97.6105	9.1281	3' UTR	2	129365122	129367351	2230	2	16176	ENSMUST00000141979.1	2279	ENSMUSG00000027398	Il1b	interleukin 1 beta
chr18	36725323	36726998	1676	*	1362	1.3401	7.61023	1.10581e-20	merged_common	310.894	122.801	Promoter	18	36725074	36726736	1663	2	12475	ENSMUST00000061829.6	0	ENSMUSG00000051439	Cd14	CD14 antigen
chr3	149436128	149437210	1083	*	441	-1.41734	7.44266	1.10762e-20	merged_common	106.447	284.312	Intron (ENSMUST00000199007.4/ENSMUST00000199007.4, intron 1 of 3)	3	148816093	148990555	174463	2	99633	ENSMUST00000200543.4	-445573	ENSMUSG00000028184	Adgrl2	adhesion G protein-coupled receptor L2
chr13	113600590	113602413	1824	*	792	1.44395	7.4035	1.17556e-20	merged_common	279.262	102.645	Intron (ENSMUST00000109241.4/170625, intron 1 of 1)	13	113592185	113613641	21457	2	170625	ENSMUST00000223993.1	11228	ENSMUSG00000042364	Snx18	sorting nexin 18
chr9	15932625	15933630	1006	*	536	-0.84491	8.92201	1.17673e-20	merged_common	361.927	650.076	Intron (ENSMUST00000217308.1/270120, intron 22 of 25)	9	15910189	15922756	12568	2	270120	ENSMUST00000217187.1	-9869	ENSMUSG00000074505	Fat3	FAT atypical cadherin 3
chr15	62392245	62393002	758	*	324	2.49057	5.83089	1.20782e-20	merged_common	134.94	24.0107	Distal Intergenic	15	62222603	62242505	19903	1	19296	ENSMUST00000182141.1	169642	ENSMUSG00000097039	Pvt1	Pvt1 oncogene
chr1	74295112	74296124	1013	*	759	1.65919	6.99536	1.26591e-20	merged_common	226.749	71.7927	Promoter	1	74288251	74295695	7445	2	69660	ENSMUST00000152603.7	0	ENSMUSG00000006301	Tmbim1	transmembrane BAX inhibitor motif containing 1
chr13	117031358	117035432	4075	*	2505	-0.84273	8.92515	1.27873e-20	merged_common	362.99	651.001	Distal Intergenic	13	117021069	117025537	4469	2	52552	ENSMUST00000223833.1	-5821	ENSMUSG00000021725	Parp8	poly (ADP-ribose) polymerase family, member 8
chr4	59330949	59332761	1813	*	938	0.81911	9.00814	1.32584e-20	merged_common	683.925	387.643	Promoter	4	59329210	59333022	3813	2	634731	ENSMUST00000136562.1	261	ENSMUSG00000038578	Susd1	sushi domain containing 1
chr1	180416698	180417698	1001	*	586	1.33379	7.61831	1.35525e-20	merged_common	311.957	123.761	Intron (ENSMUST00000070181.6/320404, intron 4 of 7)	1	180437882	180462612	24731	2	381310	ENSMUST00000210737.1	44914	ENSMUSG00000053963	Stum	mechanosensory transduction mediator
chr3	59098492	59098913	422	*	224	4.32169	4.19616	1.37232e-20	ATAC_PL_unique	81.9689	4.09912	Intron (ENSMUST00000199659.4/329650, intron 15 of 43)	3	59096448	59101821	5374	2	229323	ENSMUST00000085040.4	2908	ENSMUSG00000050075	Gpr171	G protein-coupled receptor 171
chr13	23760707	23764219	3513	*	671	0.83238	8.95783	1.37461e-20	merged_common	663.531	372.64	Promoter	13	23760692	23761230	539	2	326619	ENSMUST00000102964.3	0	ENSMUSG00000060093	Hist1h4a	histone cluster 1, H4a
chr17	87330683	87331904	1222	*	515	-1.40809	7.45204	1.39177e-20	merged_common	107.485	285.25	Promoter	17	87330214	87339949	9736	1	225049	ENSMUST00000148554.1	469	ENSMUSG00000036918	Ttc7	tetratricopeptide repeat domain 7
chr7	101362728	101363647	920	*	306	2.10064	6.32586	1.43923e-20	merged_common	166.131	38.7343	Promoter	7	101362003	101373164	11162	1	69710	ENSMUST00000133423.1	725	ENSMUSG00000032812	Arap1	ArfGAP with RhoGAP domain, ankyrin repeat and PH domain 1
chr9	65550635	65551554	920	*	592	1.87881	6.62367	1.45666e-20	merged_common	189.109	51.4203	Downstream (1-2kb)	9	65557002	65562164	5163	2	102595	ENSMUST00000213652.1	10610	ENSMUSG00000050721	Plekho2	pleckstrin homology domain containing, family O member 2
chr8	68822324	68823433	1110	*	595	-1.02523	8.35338	1.48686e-20	merged_common	229.248	466.585	3' UTR	8	68820686	68827501	6816	1	70885	ENSMUST00000147072.1	1638	ENSMUSG00000031864	Ints10	integrator complex subunit 10
chr12	34485685	34486951	1267	*	483	-1.30058	7.6775	1.53029e-20	merged_common	130.437	321.303	Intron (ENSMUST00000209902.1/79221, intron 1 of 24)	12	34052301	34528304	476004	2	79221	ENSMUST00000209750.1	41353	ENSMUSG00000004698	Hdac9	histone deacetylase 9
chr7	84210856	84212718	1863	*	893	-1.07372	8.2236	1.56995e-20	merged_common	206.034	433.672	Distal Intergenic	7	84250076	84263775	13700	2	11864	ENSMUST00000208564.1	51057	ENSMUSG00000015709	Arnt2	aryl hydrocarbon receptor nuclear translocator 2
chr13	9503980	9504797	818	*	646	-1.83341	6.71621	1.61099e-20	merged_common	55.6961	198.489	Intron (ENSMUST00000174552.7/208440, intron 2 of 36)	13	9610806	9666861	56056	1	208440	ENSMUST00000222280.1	-106009	ENSMUSG00000048264	Dip2c	disco interacting protein 2 homolog C
chr7	35035986	35036637	652	*	346	-2.38101	5.94722	1.6333e-20	merged_common	27.0342	140.822	Intron (ENSMUST00000075068.13/18624, intron 12 of 14)	7	35040482	35044707	4226	1	18624	ENSMUST00000160320.2	-3845	ENSMUSG00000063931	Pepd	peptidase D
chr19	5845102	5847241	2140	*	1613	1.75863	6.81331	1.6435e-20	merged_common	206.876	61.1379	Promoter	19	5824708	5845478	20771	2	66961	ENSMUST00000173672.1	0	ENSMUSG00000092274	Neat1	nuclear paraspeckle assembly transcript 1 (non-protein coding)
chr13	28629525	28631172	1648	*	676	-1.76707	6.81057	1.6435e-20	merged_common	60.8437	207.089	Intron (ENSMUST00000148885.7/72518, intron 5 of 7)	13	28710781	28710873	93	2	102466635	ENSMUST00000184136.1	79701	ENSMUSG00000099158	Mir6368	microRNA 6368
chr1	60862584	60862740	157	*	72	-2.34732	5.98361	1.76411e-20	ATAC_PP_unique	28.0504	142.742	Distal Intergenic	1	60887000	60912716	25717	1	12477	ENSMUST00000124816.1	-24260	ENSMUSG00000026011	Ctla4	cytotoxic T-lymphocyte-associated protein 4
chr17	66710592	66711859	1268	*	159	-1.77832	6.79154	1.79679e-20	merged_common	59.8127	205.173	Intron (ENSMUST00000037974.9/19274, intron 23 of 32)	17	66714454	66720485	6032	1	102639882	ENSMUST00000224424.1	-2595	NA	1700016K05Rik	RIKEN cDNA 1700016K05 gene
chr10	95313508	95313970	463	*	172	2.32863	6.01895	1.88551e-20	merged_common	145.338	28.9328	Exon (ENSMUST00000219461.1/ENSMUST00000219461.1, exon 1 of 1)	10	95174746	95322965	148220	2	12905	ENSMUST00000220279.1	8995	ENSMUSG00000045867	Cradd	CASP2 and RIPK1 domain containing adaptor with death domain
chr10	99130175	99134138	3964	*	593	-0.76274	9.19007	1.89026e-20	merged_common	448.418	760.835	Promoter	10	99129487	99192789	63303	1	382406	ENSMUST00000159043.1	688	ENSMUSG00000019952	Poc1b	POC1 centriolar protein B
chr2	152778909	152780127	1219	*	735	1.77575	6.77537	1.96028e-20	merged_common	202.706	59.1988	Downstream (<1kb)	2	152755094	152765034	9941	1	84682	ENSMUST00000109821.1	23815	ENSMUSG00000009876	Cox4i2	cytochrome c oxidase subunit 4I2
chr12	52429199	52430119	921	*	555	-1.98262	6.46352	2.06114e-20	merged_common	44.3914	175.44	Intron (ENSMUST00000218097.1/ENSMUST00000218097.1, intron 1 of 1)	12	52475739	52480609	4871	2	102638611	ENSMUST00000219885.1	50490	ENSMUSG00000111982	Gm35135	predicted gene, 35135
chr8	59234133	59235177	1045	*	521	-1.80171	6.75266	2.13399e-20	merged_common	57.7522	201.343	Distal Intergenic	8	57774052	58912640	1138589	2	270049	ENSMUST00000204128.2	-321493	ENSMUSG00000096914	Galntl6	UDP-N-acetyl-alpha-D-galactosamine:polypeptide N-acetylgalactosaminyltransferase-like 6
chr15	89148994	89150295	1302	*	707	2.03997	6.40085	2.19637e-20	merged_common	171.354	41.6679	Promoter	15	89142486	89149494	7009	2	19094	ENSMUST00000230734.1	0	ENSMUSG00000053137	Mapk11	mitogen-activated protein kinase 11
chr6	129399340	129400603	1264	*	760	-1.32736	7.60761	2.26926e-20	merged_common	123.121	308.963	Exon (ENSMUST00000032262.13/56760, exon 2 of 6)	6	129397610	129405259	7650	1	56760	ENSMUST00000112079.2	1730	ENSMUSG00000030159	Clec1b	C-type lectin domain family 1, member b
chr2	179027075	179028156	1082	*	425	-1.53361	7.2047	2.31055e-20	merged_common	86.6961	250.993	Distal Intergenic	2	179414936	179416882	1947	1	68175	ENSMUST00000041998.1	-386780	ENSMUSG00000039138	4930591A17Rik	RIKEN cDNA 4930591A17 gene
chr11	118018850	118019348	499	*	373	2.7355	5.54439	2.31773e-20	merged_common	120.437	18.084	Intron (ENSMUST00000132676.7/74451, intron 8 of 9)	11	118012343	118024011	11669	1	74451	ENSMUST00000155507.1	6507	ENSMUSG00000017715	Pgs1	phosphatidylglycerophosphate synthase 1
chr1	40599356	40600028	673	*	413	-2.6036	5.6905	2.3273e-20	ATAC_PP_unique	20.9474	127.319	Promoter	1	40600602	40602903	2302	1	110895	ENSMUST00000193371.1	-574	ENSMUSG00000026065	Slc9a4	solute carrier family 9 (sodium/hydrogen exchanger), member 4
chr19	6275895	6277148	1254	*	806	2.09168	6.32148	2.33086e-20	merged_common	165.114	38.737	Promoter	19	6276725	6300096	23372	1	13660	ENSMUST00000025684.3	0	ENSMUSG00000024772	Ehd1	EH-domain containing 1
chr2	102056975	102057909	935	*	233	-2.06973	6.33022	2.33086e-20	merged_common	39.27	164.859	Exon (ENSMUST00000146134.1/ENSMUST00000146134.1, exon 1 of 2)	2	102111569	102138119	26551	2	241576	ENSMUST00000127888.1	80210	ENSMUSG00000048058	Ldlrad3	low density lipoprotein receptor class A domain containing 3
chr16	87633588	87634671	1084	*	776	2.12964	6.26569	2.36057e-20	merged_common	160.955	36.7805	Distal Intergenic	16	87698945	87733346	34402	1	12013	ENSMUST00000026703.5	-64274	ENSMUSG00000025612	Bach1	BTB and CNC homology 1, basic leucine zipper transcription factor 1
chr8	84202982	84204925	1944	*	931	1.02082	8.34644	2.36971e-20	merged_common	463.636	228.497	Exon (ENSMUST00000193908.1/ENSMUST00000193908.1, exon 1 of 1)	8	84208518	84208592	75	1	387216	ENSMUST00000083677.1	-3593	ENSMUSG00000065611	Mir23a	microRNA 23a
chr12	72361575	72362612	1038	*	506	-0.74587	9.25551	2.38646e-20	merged_common	471.978	791.5	Intron (ENSMUST00000078505.13/104001, intron 1 of 8)	12	72211752	72409054	197303	2	104001	ENSMUST00000078505.13	46442	ENSMUSG00000021087	Rtn1	reticulon 1
chr2	118489921	118492137	2217	*	975	1.01423	8.37271	2.41299e-20	merged_common	471.079	233.228	Distal Intergenic	2	118475850	118479711	3862	2	20813	ENSMUST00000009693.14	-10210	ENSMUSG00000009549	Srp14	signal recognition particle 14
chr10	117595263	117596904	1642	*	715	-1.81929	6.70899	2.51162e-20	merged_common	55.69	196.534	Exon (ENSMUST00000179040.1/ENSMUST00000179040.1, exon 1 of 1)	10	117629500	117635373	5874	1	70574	ENSMUST00000138020.7	-32596	ENSMUSG00000020183	Cpm	carboxypeptidase M
chr9	107312813	107313488	676	*	122	2.40993	5.90448	2.51938e-20	merged_common	138.088	25.9833	Distal Intergenic	9	107299155	107300458	1304	1	12700	ENSMUST00000171568.1	13658	ENSMUSG00000032578	Cish	cytokine inducible SH2-containing protein
chrX	141228050	141228674	625	*	347	-2.40624	5.90448	2.51938e-20	merged_common	26.0166	137.912	Intron (ENSMUST00000101205.2/94216, intron 5 of 44)	20	141186191	141207602	21412	2	94216	ENSMUST00000137051.7	-20448	ENSMUSG00000031273	Col4a6	collagen, type IV, alpha 6
chr12	34778407	34780192	1786	*	1091	-1.31958	7.61587	2.77344e-20	merged_common	124.162	309.9	Intron (ENSMUST00000211752.1/79221, intron 3 of 26)	12	34434313	34906979	472667	2	79221	ENSMUST00000211632.1	126787	ENSMUSG00000004698	Hdac9	histone deacetylase 9
chr18	25882712	25885214	2503	*	908	-0.73531	9.28258	3.08769e-20	merged_common	482.681	803.545	Distal Intergenic	18	25479115	25754157	275043	2	108013	ENSMUST00000225477.1	-128555	ENSMUSG00000024268	Celf4	CUGBP, Elav-like family member 4
chr5	123393884	123395241	1358	*	722	0.95384	8.53397	3.26603e-20	merged_common	515.879	266.326	Promoter	5	123394798	123446896	52099	1	208104	ENSMUST00000111596.7	0	ENSMUSG00000038342	Mlxip	MLX interacting protein
chr19	21737223	21738493	1271	*	475	1.59958	7.07776	3.26762e-20	merged_common	235.168	77.5992	Distal Intergenic	19	21778342	21858327	79986	1	83921	ENSMUST00000025663.6	-39849	ENSMUSG00000024754	Cemip2	cell migration inducing hyaluronidase 2
chr15	49065846	49066643	798	*	349	-1.52808	7.20187	3.43165e-20	merged_common	86.6922	250.022	Distal Intergenic	15	47580722	48792063	1211342	2	239420	ENSMUST00000162830.7	-273783	ENSMUSG00000022311	Csmd3	CUB and Sushi multiple domains 3
chr6	128844921	128846612	1692	*	624	-0.84596	8.87932	3.49821e-20	merged_common	351.246	631.352	Exon (ENSMUST00000181825.1/ENSMUST00000181825.1, exon 1 of 2)	6	128813706	128826331	12626	2	80782	ENSMUST00000032472.10	-18590	ENSMUSG00000079298	Klrb1b	killer cell lectin-like receptor subfamily B member 1B
chr4	128733349	128734013	665	*	305	1.65824	6.95565	3.64839e-20	merged_common	220.521	69.8666	Intron (ENSMUST00000030588.12/54383, intron 9 of 14)	4	128727982	128747132	19151	1	54383	ENSMUST00000134421.1	5367	ENSMUSG00000028796	Phc2	polyhomeotic 2
chr14	20765563	20766298	736	*	363	2.16133	6.2027	3.81548e-20	merged_common	155.78	34.8246	Promoter	14	20760165	20765509	5345	2	12325	ENSMUST00000224245.1	-54	ENSMUSG00000021820	Camk2g	calcium/calmodulin-dependent protein kinase II gamma
chr10	99425098	99425815	718	*	309	1.50452	7.231	3.88742e-20	merged_common	253.047	89.1857	Distal Intergenic	10	99265641	99266799	1159	1	67603	ENSMUST00000220218.1	159457	ENSMUSG00000019960	Dusp6	dual specificity phosphatase 6
chr9	22813974	22816073	2100	*	921	-0.66877	9.54174	3.90521e-20	merged_common	591.14	939.745	Intron (ENSMUST00000039798.15/319845, intron 20 of 21)	9	22678750	22888274	209525	1	319845	ENSMUST00000124076.1	135224	ENSMUSG00000035919	Bbs9	Bardet-Biedl syndrome 9 (human)
chr14	10545302	10547319	2018	*	828	-1.75356	6.80367	3.9176e-20	merged_common	60.8375	205.138	Intron (ENSMUST00000162278.7/14198, intron 3 of 8)	14	9550092	10453458	903367	2	14198	ENSMUST00000161302.7	-91844	ENSMUSG00000060579	Fhit	fragile histidine triad gene
chr14	17953898	17954690	793	*	364	-1.5344	7.18766	3.91956e-20	merged_common	85.6547	248.114	Intron (ENSMUST00000224470.1/21834, intron 3 of 3)	14	17962821	18011261	48441	1	21834	ENSMUST00000224934.1	-8131	ENSMUSG00000021779	Thrb	thyroid hormone receptor beta
chr7	47055454	47056651	1198	*	463	-1.13552	8.02301	3.93815e-20	merged_common	175.491	385.549	Distal Intergenic	7	47051865	47053659	1795	1	67893	ENSMUST00000211066.1	3589	ENSMUSG00000010307	Tmem86a	transmembrane protein 86A
chr16	24628782	24630083	1302	*	650	1.2974	7.6657	4.40225e-20	merged_common	318.335	129.517	Intron (ENSMUST00000231352.1/210126, intron 5 of 6)	16	24721855	24979530	257676	1	210126	ENSMUST00000115314.3	-91772	ENSMUSG00000033306	Lpp	LIM domain containing preferred translocation partner in lipoma
chr18	44757313	44758432	1120	*	625	-0.90544	8.67737	4.56231e-20	merged_common	299.134	560.313	Intron (ENSMUST00000089874.8/328949, intron 2 of 18)	18	44711435	44724658	13224	2	328949	ENSMUST00000201270.1	-32655	ENSMUSG00000071856	Mcc	mutated in colorectal cancers
chr7	92984595	92985652	1058	*	272	-1.40659	7.40854	4.59015e-20	merged_common	104.347	276.634	Intron (ENSMUST00000208481.1/ENSMUST00000208481.1, intron 4 of 6)	7	92875300	92934014	58715	1	72461	ENSMUST00000207594.1	109295	ENSMUSG00000061119	Prcp	prolylcarboxypeptidase (angiotensinase C)
chr6	120953782	120955850	2069	*	513	-1.35212	7.53168	4.709e-20	merged_common	115.81	295.649	Intron (ENSMUST00000098457.8/194401, intron 11 of 15)	6	120950683	120957723	7041	2	194401	ENSMUST00000142924.1	1873	ENSMUSG00000051586	Mical3	microtubule associated monooxygenase, calponin and LIM domain containing 3
chr10	39415495	39415962	468	*	263	2.65916	5.5834	4.90464e-20	ATAC_PL_unique	120.508	19.0778	Intron (ENSMUST00000148152.7/14360, intron 2 of 4)	10	39420009	39511859	91851	1	14360	ENSMUST00000157009.7	-4047	ENSMUSG00000019843	Fyn	Fyn proto-oncogene
chr19	6363019	6364706	1688	*	801	0.73175	9.27642	5.30585e-20	merged_common	799.135	481.217	Promoter	19	6363690	6378030	14341	1	22668	ENSMUST00000131252.7	0	ENSMUSG00000024949	Sf1	splicing factor 1
chr7	89269471	89271336	1866	*	1176	-1.06642	8.20498	5.50811e-20	merged_common	203.907	427.029	Intron (ENSMUST00000041968.10/72759, intron 4 of 14)	7	89158978	89298290	139313	2	72759	ENSMUST00000139320.1	26954	ENSMUSG00000039428	Tmem135	transmembrane protein 135
chr2	167931729	167933002	1274	*	616	1.1505	7.98953	5.62845e-20	merged_common	378.665	170.577	Promoter	2	167932057	167974737	42681	1	19246	ENSMUST00000147210.7	0	ENSMUSG00000027540	Ptpn1	protein tyrosine phosphatase, non-receptor type 1
chr6	59184810	59185903	1094	*	626	1.34439	7.5434	5.79265e-20	merged_common	297.263	117.068	Distal Intergenic	6	59208870	59212033	3164	1	68140	ENSMUST00000062626.3	-22967	ENSMUSG00000049232	Tigd2	tigger transposable element derived 2
chr5	53490509	53491187	679	*	383	2.45746	5.81468	5.89426e-20	ATAC_PL_unique	131.91	24.0164	Intron (ENSMUST00000201991.3/19664, intron 1 of 6)	5	53466152	53649390	183239	1	19664	ENSMUST00000201991.3	24357	ENSMUSG00000039191	Rbpj	recombination signal binding protein for immunoglobulin kappa J region
chr10	80751474	80752802	1329	*	300	1.62671	6.99868	5.95077e-20	merged_common	224.728	72.7727	Distal Intergenic	10	80755206	80795461	40256	1	208266	ENSMUST00000105336.8	-2404	ENSMUSG00000061589	Dot1l	DOT1-like, histone H3 methyltransferase (S. cerevisiae)
chr7	80628367	80629729	1363	*	512	1.36327	7.49252	6.0535e-20	merged_common	288.846	112.274	Promoter	7	80595782	80629626	33845	2	70461	ENSMUST00000127326.1	0	ENSMUSG00000030527	Crtc3	CREB regulated transcription coactivator 3
chr2	152805954	152806917	964	*	253	2.0736	6.31263	6.09224e-20	merged_common	163.079	38.7421	Intron (ENSMUST00000007803.11/12048, intron 2 of 2)	2	152781411	152828535	47125	2	12048	ENSMUST00000173755.1	21618	ENSMUSG00000007659	Bcl2l1	BCL2-like 1
chr12	30290438	30291154	717	*	395	-2.07356	6.29389	6.18097e-20	merged_common	38.2426	160.972	Intron (ENSMUST00000142046.7/268534, intron 4 of 16)	12	30267031	30357683	90653	2	268534	ENSMUST00000156953.7	66529	ENSMUSG00000020672	Sntg2	syntrophin, gamma 2
chr5	100185037	100185452	416	*	153	-1.65477	6.93768	6.19436e-20	merged_common	69.0847	217.529	Distal Intergenic	5	100077872	100159808	81937	2	231503	ENSMUST00000063192.14	-25229	ENSMUSG00000050640	Tmem150c	transmembrane protein 150C
chr18	67945585	67946137	553	*	238	2.11111	6.25662	6.2358e-20	merged_common	158.922	36.7855	Intron (ENSMUST00000063775.3/52662, intron 1 of 5)	18	67933257	68255549	322293	1	52662	ENSMUST00000063775.3	12328	ENSMUSG00000024544	Ldlrad4	low density lipoprotein receptor class A domain containing 4
chr3	65957075	65959141	2067	*	1343	0.74252	9.22763	6.44034e-20	merged_common	775.45	463.482	Promoter	3	65946151	65958162	12012	2	56706	ENSMUST00000129002.7	0	ENSMUSG00000027829	Ccnl1	cyclin L1
chr19	45236339	45236957	619	*	269	2.42197	5.85497	6.52224e-20	merged_common	133.988	25.0022	Promoter	19	45232684	45235812	3129	2	16814	ENSMUST00000099401.5	-527	ENSMUSG00000025216	Lbx1	ladybird homeobox 1
chr5	122109299	122110200	902	*	625	1.80534	6.69239	6.59957e-20	merged_common	193.349	55.3197	Promoter	5	122108070	122111113	3044	2	330188	ENSMUST00000198618.4	913	ENSMUSG00000043036	Ccdc63	coiled-coil domain containing 63
chr3	101599915	101601025	1111	*	588	1.51968	7.17492	6.64941e-20	merged_common	244.681	85.3358	Intron (ENSMUST00000036493.7/11928, intron 1 of 22)	3	101576219	101604684	28466	2	11928	ENSMUST00000036493.7	3659	ENSMUSG00000033161	Atp1a1	ATPase, Na+/K+ transporting, alpha 1 polypeptide
chr14	103476677	103478550	1874	*	1531	-1.0282	8.30746	6.65113e-20	merged_common	221.838	452.433	Intron (ENSMUST00000227693.1/ENSMUST00000227693.1, intron 1 of 2)	14	103513342	103612797	99456	1	64929	ENSMUST00000227322.1	-34792	ENSMUSG00000022123	Scel	sciellin
chr7	90209094	90216272	7179	*	6327	2.38842	5.89395	7.12724e-20	merged_common	136.066	25.9874	3' UTR	7	90195232	90197006	1775	1	233489	ENSMUST00000208127.1	13862	ENSMUSG00000039361	Picalm	phosphatidylinositol binding clathrin assembly protein
chr12	10940530	10941734	1205	*	406	-2.38563	5.89395	7.12724e-20	ATAC_PP_unique	26.0125	135.934	Distal Intergenic	12	11047813	11078742	30930	1	71457	ENSMUST00000222157.1	-106079	ENSMUSG00000113620	7420701I03Rik	RIKEN cDNA 7420701I03 gene
chr2	167831086	167831433	348	*	150	3.49286	4.76958	7.33987e-20	ATAC_PL_unique	91.5197	8.12941	Intron (ENSMUST00000143649.1/ENSMUST00000143649.1, intron 1 of 1)	2	167932057	167974737	42681	1	19246	ENSMUST00000147210.7	-100624	ENSMUSG00000027540	Ptpn1	protein tyrosine phosphatase, non-receptor type 1
chr16	26095391	26096595	1205	*	767	-1.32856	7.57091	7.44185e-20	merged_common	119.978	301.328	Intron (ENSMUST00000039990.5/210530, intron 1 of 14)	16	25959288	26105784	146497	2	210530	ENSMUST00000039990.5	9189	ENSMUSG00000038168	P3h2	prolyl 3-hydroxylase 2
chr10	95191777	95192505	729	*	287	2.35663	5.93171	7.6981e-20	merged_common	138.144	26.9721	Intron (ENSMUST00000220279.1/12905, intron 1 of 1)	10	95120582	95145825	25244	2	628062	ENSMUST00000220248.1	-45952	ENSMUSG00000112481	Gm29684	predicted gene, 29684
chr8	24722903	24723930	1028	*	554	-1.67296	6.90297	7.70719e-20	merged_common	67.0186	213.701	3' UTR	8	24715107	24725782	10676	2	11497	ENSMUST00000169598.1	1852	ENSMUSG00000031553	Adam3	a disintegrin and metallopeptidase domain 3 (cyritestin)
chr5	62854140	62855258	1119	*	672	-1.94151	6.47564	8.01556e-20	merged_common	45.4083	174.417	Intron (ENSMUST00000170704.1/100322896, intron 7 of 8)	5	62813823	62888308	74486	1	100322896	ENSMUST00000170704.1	40317	ENSMUSG00000090326	Dthd1	death domain containing 1
chr10	67125810	67127765	1956	*	1020	1.09592	8.12205	8.16153e-20	merged_common	407.317	190.558	Promoter	10	67127258	67256318	129061	1	108829	ENSMUST00000174408.7	0	ENSMUSG00000037876	Jmjd1c	jumonji domain containing 1C
chr13	3522956	3524655	1700	*	679	-1.00028	8.38012	8.17868e-20	merged_common	235.565	471.221	Distal Intergenic	13	3538063	3567871	29809	1	14569	ENSMUST00000223396.1	-13408	ENSMUSG00000021218	Gdi2	guanosine diphosphate (GDP) dissociation inhibitor 2
chrX	10250311	10251346	1036	*	410	-1.57763	7.06222	8.33343e-20	merged_common	77.3541	230.886	Promoter	20	10252305	10321024	68720	1	18416	ENSMUST00000049910.12	-959	ENSMUSG00000031173	Otc	ornithine transcarbamylase
chr1	177462377	177463322	946	*	623	-1.05896	8.20863	8.49055e-20	merged_common	204.953	427.005	Distal Intergenic	1	177445821	177450764	4944	1	30928	ENSMUST00000077225.7	16556	ENSMUSG00000063659	Zbtb18	zinc finger and BTB domain containing 18
chr3	48080303	48081334	1032	*	508	-0.96483	8.46241	8.93871e-20	merged_common	252.475	492.789	Distal Intergenic	3	48026013	48026760	748	2	666202	ENSMUST00000193787.1	-53543	ENSMUSG00000103257	Gm7977	tyrosine 3-monooxygenase/tryptophan 5-monooxygenase activation protein, theta polypeptide pseudogene
chr19	46617923	46618817	895	*	604	2.27056	6.03841	9.11332e-20	merged_common	144.376	29.9219	Intron (ENSMUST00000138302.8/226178, intron 1 of 3)	19	46623401	46652522	29122	1	226178	ENSMUST00000156649.1	-4584	ENSMUSG00000047731	Wbp1l	WW domain binding protein 1 like
chr4	88705797	88706408	612	*	333	-1.55728	7.09011	9.72012e-20	merged_common	79.4222	233.738	Distal Intergenic	4	88690302	88691359	1058	2	15974	ENSMUST00000071378.5	-14438	ENSMUSG00000100079	Ifnab	interferon alpha B
chr3	41574164	41575595	1432	*	799	-1.62275	6.98496	1.0108e-19	merged_common	72.1829	222.296	Intron (ENSMUST00000026865.14/269424, intron 1 of 10)	3	41580856	41589003	8148	1	269424	ENSMUST00000195200.1	-5261	ENSMUSG00000025764	Jade1	jade family PHD finger 1
chr11	69098124	69100948	2825	*	656	1.32468	7.56864	1.06413e-19	merged_common	300.45	119.951	Promoter	11	69098948	69109960	11013	1	18626	ENSMUST00000021271.13	0	ENSMUSG00000020893	Per1	period circadian clock 1
chr16	92399594	92400712	1119	*	573	1.36169	7.46696	1.18576e-19	merged_common	283.618	110.363	Promoter	16	92391955	92400077	8123	2	54720	ENSMUST00000023672.9	0	ENSMUSG00000022951	Rcan1	regulator of calcineurin 1
chr2	49416533	49417808	1276	*	757	-0.8672	8.77146	1.21243e-19	merged_common	323.553	590.2	Distal Intergenic	2	49451486	49551948	100463	1	227867	ENSMUST00000092123.10	-33678	ENSMUSG00000069495	Epc2	enhancer of polycomb homolog 2
chr8	9184922	9186292	1371	*	451	-1.12636	8.00963	1.21346e-19	merged_common	174.423	380.779	Distal Intergenic	8	9144669	9149050	4382	1	74688	ENSMUST00000209053.1	40253	ENSMUSG00000109215	4930453L07Rik	RIKEN cDNA 4930453L07 gene
chr7	117470100	117471160	1061	*	572	1.32612	7.55781	1.24572e-19	merged_common	298.352	118.994	Intron (ENSMUST00000160035.7/233781, intron 1 of 6)	7	117475492	117549359	73868	1	233781	ENSMUST00000161889.1	-4332	ENSMUSG00000030657	Xylt1	xylosyltransferase 1
chr13	74021932	74023056	1125	*	532	-1.49382	7.21865	1.25512e-19	merged_common	88.754	249.961	Intron (ENSMUST00000140217.7/72948, intron 1 of 2)	13	74009419	74035753	26335	1	72948	ENSMUST00000022057.8	12513	ENSMUSG00000021573	Tppp	tubulin polymerization promoting protein
chr6	39278188	39278873	686	*	428	1.82808	6.62574	1.29798e-19	merged_common	186.08	52.4074	Distal Intergenic	6	39343910	39347350	3441	2	72144	ENSMUST00000201208.1	68477	ENSMUSG00000029924	Slc37a3	solute carrier family 37 (glycerol-3-phosphate transporter), member 3
chr13	25790427	25792036	1610	*	1097	-1.45511	7.28124	1.34559e-19	merged_common	93.9411	257.565	Distal Intergenic	13	25921033	25966316	45284	2	100503530	ENSMUST00000139335.2	174280	ENSMUSG00000086531	Gm11351	predicted gene 11351
chr14	47920369	47921278	910	*	414	1.23079	7.76484	1.38649e-19	merged_common	333.198	141.97	Intron (ENSMUST00000227343.1/73961, intron 2 of 3)	14	47898853	47944189	45337	1	73961	ENSMUST00000227343.1	21516	ENSMUSG00000115609	4930447J18Rik	RIKEN cDNA 4930447J18 gene
chr5	21488162	21489410	1249	*	582	-1.18214	7.86234	1.39912e-19	merged_common	154.479	350.534	Intron (ENSMUST00000051358.10/320118, intron 18 of 19)	5	21434729	21480804	46076	1	330050	ENSMUST00000146056.1	53433	ENSMUSG00000047221	Fam185a	family with sequence similarity 185, member A
chr19	55713985	55714400	416	*	207	2.28741	5.99877	1.44472e-19	merged_common	141.286	28.9414	Distal Intergenic	19	55640589	55702204	61616	2	77594	ENSMUST00000181198.1	-11781	ENSMUSG00000097632	4930552P12Rik	RIKEN cDNA 4930552P12 gene
chr11	103346175	103347151	977	*	668	1.41612	7.36271	1.51449e-19	merged_common	268.871	100.751	Exon (ENSMUST00000124462.2/653030, exon 3 of 4)	11	103344753	103350124	5372	1	653030	ENSMUST00000124462.2	1422	ENSMUSG00000085887	Arhgap27os3	Rho GTPase activating protein 27, opposite strand 3
chr1	165160883	165161826	944	*	338	-1.61649	6.98176	1.52651e-19	merged_common	72.1794	221.322	Promoter	1	165137855	165160773	22919	2	83993	ENSMUST00000027859.11	-110	ENSMUSG00000026572	Tbx19	T-box 19
chr9	32145934	32147026	1093	*	470	-1.30815	7.58547	1.57927e-19	merged_common	122.056	302.239	Intron (ENSMUST00000174641.7/330914, intron 2 of 21)	9	32129570	32181966	52397	1	330914	ENSMUST00000182310.1	16364	ENSMUSG00000041444	Arhgap32	Rho GTPase activating protein 32
chr3	115682339	115683170	832	*	256	-1.36973	7.44641	1.6095e-19	merged_common	108.5	280.387	Distal Intergenic	3	115710433	115715072	4640	2	13609	ENSMUST00000055676.3	31902	ENSMUSG00000045092	S1pr1	sphingosine-1-phosphate receptor 1
chr10	115530582	115531372	791	*	333	-2.05602	6.28493	1.61638e-19	merged_common	38.2376	159.006	Intron (ENSMUST00000020350.14/14160, intron 1 of 17)	10	115569986	115582448	12463	1	77798	ENSMUST00000173620.1	-38614	ENSMUSG00000092210	A930009A15Rik	RIKEN cDNA A930009A15 gene
chr9	22962098	22963199	1102	*	386	-0.99365	8.35712	1.62756e-19	merged_common	232.372	462.704	Distal Intergenic	9	23223076	23485200	262125	1	73230	ENSMUST00000071982.6	-259877	ENSMUSG00000031963	Bmper	BMP-binding endothelial regulator
chr16	93192593	93193529	937	*	346	2.13254	6.18861	1.65717e-19	merged_common	152.734	34.832	Distal Intergenic	16	93343724	93353189	9466	2	69857	ENSMUST00000185971.6	159660	ENSMUSG00000100277	1810053B23Rik	RIKEN cDNA 1810053B23 gene
chr3	149379441	149380584	1144	*	837	-1.26593	7.6598	1.77827e-19	merged_common	130.403	313.596	Intron (ENSMUST00000199007.4/ENSMUST00000199007.4, intron 1 of 3)	3	148816093	148990555	174463	2	99633	ENSMUST00000200543.4	-388886	ENSMUSG00000028184	Adgrl2	adhesion G protein-coupled receptor L2
chr7	142341823	142342830	1008	*	624	1.32105	7.55532	1.78045e-19	merged_common	297.314	118.998	Intron (ENSMUST00000059223.14/320802, intron 3 of 3)	7	142325837	142338022	12186	2	320802	ENSMUST00000131791.1	-3801	ENSMUSG00000045777	Ifitm10	interferon induced transmembrane protein 10
chrX	113867676	113868596	921	*	361	-1.07097	8.15397	1.83151e-19	merged_common	196.514	412.845	Distal Intergenic	20	113724349	113834256	109908	1	93837	ENSMUST00000123974.1	143327	ENSMUSG00000025592	Dach2	dachshund family transcription factor 2
chr4	59837509	59838289	781	*	428	-1.53683	7.13529	1.91402e-19	merged_common	82.5316	239.471	Intron (ENSMUST00000030080.6/209131, intron 1 of 8)	4	59805880	59834106	28227	1	209131	ENSMUST00000123665.1	31629	ENSMUSG00000028385	Snx30	sorting nexin family member 30
chr7	125588705	125589158	454	*	207	2.36659	5.88326	2.00684e-19	merged_common	134.043	25.9915	Distal Intergenic	7	125603429	125631506	28078	1	60504	ENSMUST00000206234.1	-14271	ENSMUSG00000030745	Il21r	interleukin 21 receptor
chr3	9019842	9020842	1001	*	508	0.90981	8.60613	2.02256e-19	merged_common	534.126	284.291	Distal Intergenic	3	8925593	9004723	79131	2	21985	ENSMUST00000120143.7	-15119	ENSMUSG00000027506	Tpd52	tumor protein D52
chr11	86578685	86583682	4998	*	438	1.42123	7.33751	2.03485e-19	merged_common	264.684	98.8312	Promoter	11	86584067	86584158	92	2	387140	ENSMUST00000083521.1	476	ENSMUSG00000065455	Mir21a	microRNA 21a
chr14	114876375	114878169	1795	*	439	-1.49414	7.20177	2.12668e-19	merged_common	87.7119	247.081	Exon (ENSMUST00000226159.1/ENSMUST00000226159.1, exon 1 of 2)	14	114831965	114861327	29363	1	75822	ENSMUST00000226121.1	44410	ENSMUSG00000115320	4930524C18Rik	RIKEN cDNA 4930524C18 gene
chr2	178413556	178415472	1917	*	986	0.83162	8.85221	2.19199e-19	merged_common	616.527	346.425	Promoter	2	178411206	178414472	3267	2	228966	ENSMUST00000058678.4	0	ENSMUSG00000049999	Ppp1r3d	protein phosphatase 1, regulatory subunit 3D
chr4	54533348	54536544	3197	*	2440	-1.40493	7.36369	2.20215e-19	merged_common	101.211	268.012	Distal Intergenic	4	54945048	55008314	63267	1	242466	ENSMUST00000133895.7	-408504	ENSMUSG00000060206	Zfp462	zinc finger protein 462
chr16	76406094	76411185	5092	*	1019	-0.90096	8.6228	2.27438e-19	merged_common	288.478	538.678	Distal Intergenic	16	76403251	76403652	402	2	14109	ENSMUST00000052867.8	-2442	ENSMUSG00000038274	Fau	Finkel-Biskis-Reilly murine sarcoma virus (FBR-MuSV) ubiquitously expressed (fox derived)
chr13	49205264	49206201	938	*	525	1.42386	7.32474	2.35717e-19	merged_common	262.59	97.871	Exon (ENSMUST00000221443.1/68480, exon 4 of 7)	13	49202950	49204116	1167	2	68480	ENSMUST00000223496.1	-1148	ENSMUSG00000037960	Card19	caspase recruitment domain family, member 19
chr1	97319378	97320268	891	*	403	-1.64428	6.91049	2.4255e-19	merged_common	68.0418	212.693	Distal Intergenic	1	97059514	97128301	68788	2	74441	ENSMUST00000189547.1	-191077	ENSMUSG00000026331	Slco6c1	solute carrier organic anion transporter family, member 6c1
chr13	74004190	74004850	661	*	214	-1.50012	7.18759	2.44158e-19	merged_common	86.6742	245.172	Distal Intergenic	13	74009407	74031371	21965	1	72948	ENSMUST00000140217.7	-4557	ENSMUSG00000021573	Tppp	tubulin polymerization promoting protein
chr11	115640974	115641624	651	*	406	2.02873	6.32642	2.48259e-19	merged_common	162.105	39.7272	Downstream (2-3kb)	11	115614184	115628295	14112	2	67283	ENSMUST00000178003.7	-12679	ENSMUSG00000020744	Slc25a19	solute carrier family 25 (mitochondrial thiamine pyrophosphate carrier), member 19
chr1	172499710	172502043	2334	*	1491	1.54695	7.10465	2.49383e-19	merged_common	235.262	80.5144	Promoter	1	172500047	172505934	5888	1	21346	ENSMUST00000138296.7	0	ENSMUSG00000026547	Tagln2	transgelin 2
chr11	86652230	86653166	937	*	412	2.90923	5.27441	2.51805e-19	ATAC_PL_unique	106.081	14.1212	Intron (ENSMUST00000018315.9/75909, intron 5 of 11)	11	86643233	86663573	20341	2	75909	ENSMUST00000127267.1	10407	ENSMUSG00000018171	Vmp1	vacuole membrane protein 1
chr5	19895571	19896381	811	*	488	-1.2576	7.68996	2.61099e-19	merged_common	133.543	319.298	Intron (ENSMUST00000197354.4/50791, intron 2 of 21)	5	19907518	20704792	797275	1	50791	ENSMUST00000101558.9	-11137	ENSMUSG00000040003	Magi2	membrane associated guanylate kinase, WW and PDZ domain containing 2
chr5	96878858	96879784	927	*	498	1.30821	7.57201	2.63834e-19	merged_common	299.438	120.92	Exon (ENSMUST00000197025.1/ENSMUST00000197025.1, exon 1 of 4)	5	96841998	96845860	3863	1	11745	ENSMUST00000196126.1	36860	ENSMUSG00000029484	Anxa3	annexin A3
chr13	119916317	119917269	953	*	327	-2.16329	6.13178	2.67232e-19	merged_common	33.1316	148.408	Intron (ENSMUST00000187530.2/106029237, intron 1 of 2)	13	119912095	119929272	17178	2	106029237	ENSMUST00000187530.2	12003	ENSMUSG00000096175	Gm21761	predicted gene, 21761
chr16	55555108	55555734	627	*	255	1.7917	6.66026	2.69724e-19	merged_common	188.198	54.3576	Distal Intergenic	16	55494731	55494797	67	1	100628589	ENSMUST00000175551.1	60377	ENSMUSG00000093292	Mir5118	microRNA 5118
chr9	24069717	24070347	631	*	216	-1.80851	6.64889	2.69724e-19	merged_common	53.6176	187.812	Distal Intergenic	9	24097996	24289892	191897	1	319239	ENSMUST00000133787.7	-27649	ENSMUSG00000043659	Npsr1	neuropeptide S receptor 1
chr10	21701146	21702346	1201	*	528	-1.22935	7.74203	2.70512e-19	merged_common	139.813	327.807	Intron (ENSMUST00000187019.6/432436, intron 2 of 2)	10	21690845	21693978	3134	1	432436	ENSMUST00000071008.5	10301	ENSMUSG00000056716	Gm5420	predicted gene 5420
chr15	88489640	88491448	1809	*	1124	-0.8334	8.8508	2.80885e-19	merged_common	345.873	616.305	Distal Intergenic	15	88600302	88601669	1368	1	70073	ENSMUST00000066949.8	-108854	ENSMUSG00000054117	Zdhhc25	zinc finger, DHHC domain containing 25
chr5	139397558	139398725	1168	*	525	1.80169	6.63922	2.92657e-19	merged_common	186.117	53.3855	Intron (ENSMUST00000066052.11/73212, intron 2 of 4)	5	139405280	139415621	10342	1	319772	ENSMUST00000163940.1	-6555	ENSMUSG00000044092	C130050O18Rik	RIKEN cDNA C130050O18 gene
chr7	79465518	79467046	1529	*	747	0.7825	9.01778	3.13228e-19	merged_common	679.83	395.225	Promoter	7	79446231	79466362	20132	2	18975	ENSMUST00000073889.13	0	ENSMUSG00000039176	Polg	polymerase (DNA directed), gamma
chr17	24171552	24172637	1086	*	459	1.51929	7.12515	3.24763e-19	merged_common	236.352	82.4533	Downstream (2-3kb)	17	24164542	24169702	5161	2	11984	ENSMUST00000150647.1	-1850	ENSMUSG00000024121	Atp6v0c	ATPase, H+ transporting, lysosomal V0 subunit C
chr9	85577393	85578264	872	*	509	-1.62897	6.92451	3.27728e-19	merged_common	69.0718	213.634	Distal Intergenic	9	85708168	85718538	10371	2	108837	ENSMUST00000188768.1	140274	ENSMUSG00000035941	Ibtk	inhibitor of Bruton agammaglobulinemia tyrosine kinase
chr18	84807173	84808254	1082	*	696	-0.8862	8.66239	3.41736e-19	merged_common	298.025	550.84	Distal Intergenic	18	84851338	84880401	29064	1	109672	ENSMUST00000160180.7	-43084	ENSMUSG00000024646	Cyb5a	cytochrome b5 type A (microsomal)
chr13	56171829	56173750	1922	*	1496	-1.06211	8.14167	3.4965e-19	merged_common	195.444	408.085	3' UTR	13	56173704	56178801	5098	2	212937	ENSMUST00000169652.2	5051	ENSMUSG00000049625	Tifab	TRAF-interacting protein with forkhead-associated domain, family member B
chr3	144627783	144629167	1385	*	1008	1.97167	6.40065	3.53973e-19	merged_common	167.322	42.6601	Distal Intergenic	3	144577652	144595432	17781	1	93684	ENSMUST00000151086.2	50131	ENSMUSG00000037072	Selenof	selenoprotein F
chr4	55650548	55652330	1783	*	762	0.76926	9.06487	3.54405e-19	merged_common	699.17	410.216	Distal Intergenic	4	55527143	55532466	5324	2	16600	ENSMUST00000107619.2	-118082	ENSMUSG00000003032	Klf4	Kruppel-like factor 4 (gut)
chr5	103705858	103706411	554	*	336	3.22453	4.95345	3.55585e-19	ATAC_PL_unique	94.7277	10.1344	Intron (ENSMUST00000126335.1/17355, intron 1 of 6)	5	103692374	103816428	124055	1	17355	ENSMUST00000126335.1	13484	ENSMUSG00000029313	Aff1	AF4/FMR2 family, member 1
chr2	107223709	107225446	1738	*	1171	-1.25165	7.67554	3.62039e-19	merged_common	132.488	315.471	Distal Intergenic	2	107290639	107298502	7864	1	16492	ENSMUST00000037012.2	-65193	ENSMUSG00000042604	Kcna4	potassium voltage-gated channel, shaker-related subfamily, member 4
chr6	145040610	145041582	973	*	423	-2.67822	5.50141	3.64661e-19	ATAC_PP_unique	17.9051	114.605	Promoter	6	145032790	145040755	7966	2	12035	ENSMUST00000155693.7	0	ENSMUSG00000030268	Bcat1	branched chain aminotransferase 1, cytosolic
chr19	46303895	46306238	2344	*	691	1.12245	7.99176	3.71496e-19	merged_common	375.582	172.51	Promoter	19	46304737	46312090	7354	1	18034	ENSMUST00000073116.11	0	ENSMUSG00000025225	Nfkb2	nuclear factor of kappa light polypeptide gene enhancer in B cells 2, p49/p100
chr5	100184763	100184890	128	*	43	-1.68168	6.83886	3.77065e-19	ATAC_PP_unique	63.9122	205.031	Distal Intergenic	5	100077872	100159808	81937	2	231503	ENSMUST00000063192.14	-24955	ENSMUSG00000050640	Tmem150c	transmembrane protein 150C
chr7	137268133	137269060	928	*	462	-1.20744	7.77357	3.82192e-19	merged_common	143.993	332.518	Promoter	7	137195884	137267538	71655	2	13593	ENSMUST00000209578.1	-595	ENSMUSG00000010476	Ebf3	early B cell factor 3
chr15	27701905	27704012	2108	*	906	-0.84082	8.80938	3.96833e-19	merged_common	335.221	600.404	Distal Intergenic	15	27655071	27681579	26509	2	223433	ENSMUST00000100739.4	-20326	ENSMUSG00000056069	Otulinl	OTU deubiquitinase with linear linkage specificity like
chr9	120010894	120011900	1007	*	421	2.03677	6.29459	4.10313e-19	merged_common	159.01	38.7522	Exon (ENSMUST00000215481.1/ENSMUST00000215481.1, exon 2 of 2)	9	120013755	120023598	9844	2	22437	ENSMUST00000111635.2	11698	ENSMUSG00000079243	Xirp1	xin actin-binding repeat containing 1
chr15	80024135	80026459	2325	*	1655	1.64969	6.89047	4.12017e-19	merged_common	210.156	66.9784	Intron (ENSMUST00000230187.1/ENSMUST00000230187.1, intron 1 of 4)	15	80002391	80014977	12587	2	18591	ENSMUST00000229168.1	-9158	ENSMUSG00000000489	Pdgfb	platelet derived growth factor, B polypeptide
chr3	54681301	54682354	1054	*	453	-1.50051	7.17034	4.13806e-19	merged_common	85.6324	242.291	Distal Intergenic	3	54692807	54728636	35830	1	56790	ENSMUST00000197502.4	-10453	ENSMUSG00000027751	Supt20	suppressor of Ty 20
chr16	87733236	87738633	5398	*	4922	2.77474	5.39721	4.19565e-19	ATAC_PL_unique	110.246	16.1095	3' UTR	16	87699004	87722920	23917	1	12013	ENSMUST00000156958.1	34232	ENSMUSG00000025612	Bach1	BTB and CNC homology 1, basic leucine zipper transcription factor 1
chr15	69014937	69015966	1030	*	468	-1.39459	7.35841	4.64172e-19	merged_common	101.203	266.078	Intron (ENSMUST00000022954.6/13992, intron 3 of 8)	15	68930068	69024765	94698	1	13992	ENSMUST00000230073.1	84869	ENSMUSG00000022332	Khdrbs3	KH domain containing, RNA binding, signal transduction associated 3
chr5	32157905	32159060	1156	*	618	4.56096	3.90689	4.65206e-19	ATAC_PL_unique	72.8759	3.08744	Distal Intergenic	5	32146521	32153713	7193	1	14284	ENSMUST00000202169.1	11384	ENSMUSG00000029135	Fosl2	fos-like antigen 2
chr18	67389975	67391772	1798	*	1054	1.28451	7.59418	4.68672e-19	merged_common	301.588	123.805	Promoter	18	67390717	67402748	12032	1	67951	ENSMUST00000001513.6	0	ENSMUSG00000001473	Tubb6	tubulin, beta 6 class V
chr3	136426282	136427506	1225	*	469	-0.88666	8.65228	4.79683e-19	merged_common	295.897	547.081	Distal Intergenic	3	136435270	136449349	14080	2	70055	ENSMUST00000189233.1	21843	ENSMUSG00000099508	1700030L20Rik	RIKEN cDNA 1700030L20 gene
chr15	64001433	64002619	1187	*	643	1.62996	6.92176	4.95646e-19	merged_common	213.3	68.9166	Intron (ENSMUST00000063838.10/223601, intron 1 of 11)	15	63930942	63997969	67028	2	223601	ENSMUST00000164532.2	-3464	ENSMUSG00000022378	Fam49b	family with sequence similarity 49, member B
chr13	63108179	63109193	1015	*	635	-0.97929	8.37588	5.05735e-19	merged_common	236.588	466.433	Promoter	13	63107522	63190551	83030	1	72061	ENSMUST00000222907.1	657	ENSMUSG00000021458	Aopep	aminopeptidase O
chr19	10041191	10042763	1573	*	371	1.5985	6.96565	5.22283e-19	merged_common	217.504	71.8243	Promoter	19	10041548	10059671	18124	1	60527	ENSMUST00000115995.2	0	ENSMUSG00000024664	Fads3	fatty acid desaturase 3
chr15	86292100	86293735	1636	*	769	1.67007	6.83671	5.74709e-19	merged_common	203.904	64.0743	Exon (ENSMUST00000063414.8/223754, exon 5 of 13)	15	86235505	86292162	56658	1	223754	ENSMUST00000229242.1	56595	ENSMUSG00000051864	Tbc1d22a	TBC1 domain family, member 22a
chr8	25051398	25053760	2363	*	702	-0.91932	8.53883	5.76619e-19	merged_common	270.441	511.464	Exon (ENSMUST00000064883.13/83436, exon 10 of 12)	8	25024929	25038962	14034	2	330723	ENSMUST00000084031.5	-12436	ENSMUSG00000037406	Htra4	HtrA serine peptidase 4
chr2	52997527	52998442	916	*	562	1.27145	7.62077	5.7874e-19	merged_common	305.811	126.68	Intron (ENSMUST00000155586.8/71409, intron 1 of 26)	2	52857868	53131878	274011	1	71409	ENSMUST00000050719.12	139659	ENSMUSG00000036053	Fmnl2	formin-like 2
chr12	21335297	21336567	1271	*	744	1.14629	7.90483	5.81835e-19	merged_common	356.554	161.086	Intron (ENSMUST00000101551.9/11491, intron 12 of 19)	12	21330073	21332521	2449	2	11491	ENSMUST00000132339.1	-2776	ENSMUSG00000052593	Adam17	a disintegrin and metallopeptidase domain 17
chr4	32186872	32187703	832	*	471	-1.9703	6.35314	6.14592e-19	merged_common	41.2977	161.825	Distal Intergenic	4	32238804	32586104	347301	1	12014	ENSMUST00000108180.8	-51101	ENSMUSG00000040270	Bach2	BTB and CNC homology, basic leucine zipper transcription factor 2
chr7	24386718	24388012	1295	*	674	0.94685	8.45189	6.26637e-19	merged_common	486.169	252.207	Distal Intergenic	7	24382170	24384789	2620	1	16534	ENSMUST00000205881.1	4548	ENSMUSG00000054342	Kcnn4	potassium intermediate/small conductance calcium-activated channel, subfamily N, member 4
chr8	126844340	126845082	743	*	384	2.47629	5.70097	6.60836e-19	ATAC_PL_unique	122.711	22.0518	Exon (ENSMUST00000212406.1/ENSMUST00000212406.1, exon 2 of 9)	8	126839233	126851473	12241	1	414091	ENSMUST00000212914.1	5107	NA	A630001O12Rik	RIKEN cDNA A630001O12 gene
chr16	45005221	45005969	749	*	297	-1.47723	7.19313	6.79759e-19	merged_common	87.7006	244.17	Distal Intergenic	16	44965254	44966854	1601	1	74603	ENSMUST00000163358.1	39967	ENSMUSG00000036172	Cd200r3	CD200 receptor 3
chr8	125052902	125055232	2331	*	1430	1.15491	7.88329	7.00582e-19	merged_common	352.321	158.225	Promoter	8	125054195	125261151	206957	1	244667	ENSMUST00000074562.10	0	ENSMUSG00000043051	Disc1	disrupted in schizophrenia 1
chr8	46394922	46396154	1233	*	553	-1.0117	8.25711	7.15108e-19	merged_common	215.458	434.424	Distal Intergenic	8	46471037	46536051	65015	1	14081	ENSMUST00000034046.12	-74883	ENSMUSG00000018796	Acsl1	acyl-CoA synthetase long-chain family member 1
chr12	16876745	16878085	1341	*	874	-1.18643	7.80436	7.39116e-19	merged_common	148.174	337.227	Distal Intergenic	12	16894895	16987823	92929	1	19878	ENSMUST00000020904.7	-16810	ENSMUSG00000020580	Rock2	Rho-associated coiled-coil containing protein kinase 2
chr14	70392437	70393258	822	*	470	1.453	7.22121	7.51586e-19	merged_common	246.887	90.1784	Exon (ENSMUST00000048129.5/57746, exon 17 of 23)	14	70426509	70429064	2556	2	57746	ENSMUST00000226426.1	35806	ENSMUSG00000033644	Piwil2	piwi-like RNA-mediated gene silencing 2
chr16	84999980	85001282	1303	*	500	-1.10463	7.99853	8.02772e-19	merged_common	174.395	375.026	Intron (ENSMUST00000227723.1/11820, intron 13 of 17)	16	84955148	84977983	22836	2	11820	ENSMUST00000228375.1	-21997	ENSMUSG00000022892	App	amyloid beta (A4) precursor protein
chr10	21191784	21193108	1325	*	837	-1.26112	7.62211	8.17989e-19	merged_common	127.252	305.001	Distal Intergenic	10	21186947	21188618	1672	1	102636600	ENSMUST00000216598.1	4837	ENSMUSG00000111005	Gm33619	predicted gene, 33619
chr2	129299730	129303231	3502	*	1713	3.42809	4.73787	8.3683e-19	ATAC_PL_unique	87.5427	8.13321	3' UTR	2	129297370	129307826	10457	1	100503468	ENSMUST00000144178.1	2360	ENSMUSG00000085498	Gm14023	predicted gene 14023
chr13	75557320	75558093	774	*	149	-1.71586	6.75963	8.76268e-19	merged_common	59.7845	196.388	Distal Intergenic	13	75644896	75645171	276	1	751556	ENSMUST00000099371.4	-86803	ENSMUSG00000076236	Mir682	microRNA 682
chr2	174344700	174344937	238	*	93	-1.77352	6.65856	9.21966e-19	merged_common	54.6368	186.796	Promoter	2	174344650	174345728	1079	1	14683	ENSMUST00000129534.1	50	ENSMUSG00000027523	Gnas	GNAS (guanine nucleotide binding protein, alpha stimulating) complex locus
chr11	29808300	29809311	1012	*	416	-1.27446	7.59282	9.41248e-19	merged_common	124.12	300.256	Intron (ENSMUST00000058902.5/237711, intron 17 of 41)	11	29801989	29803099	1111	2	237711	ENSMUST00000169980.1	-5201	ENSMUSG00000044072	Eml6	echinoderm microtubule associated protein like 6
chr11	62645936	62646883	948	*	438	1.4469	7.21823	1.10173e-18	merged_common	245.858	90.1828	Intron (ENSMUST00000057194.8/192976, intron 1 of 3)	11	62605823	62648040	42218	2	192976	ENSMUST00000128705.7	1157	ENSMUSG00000046417	Lrrc75a	leucine rich repeat containing 75A
chr8	89392368	89393511	1144	*	561	-1.1075	7.98245	1.12978e-18	merged_common	172.291	371.238	Distal Intergenic	8	89027235	89044162	16928	2	58198	ENSMUST00000034090.7	-348206	ENSMUSG00000031665	Sall1	spalt like transcription factor 1
chr10	13685341	13688631	3291	*	1034	-0.766	9.02759	1.13253e-18	merged_common	400.204	680.565	Intron (ENSMUST00000162610.7/66253, intron 4 of 5)	10	13523842	13553142	29301	2	56535	ENSMUST00000170376.7	-132199	ENSMUSG00000019809	Pex3	peroxisomal biogenesis factor 3
chr10	99126207	99128735	2529	*	1617	-0.98078	8.33067	1.13668e-18	merged_common	229.171	452.276	Promoter	10	99129487	99192789	63303	1	382406	ENSMUST00000159043.1	-752	ENSMUSG00000019952	Poc1b	POC1 centriolar protein B
chr13	81147713	81148343	631	*	320	-2.1098	6.14846	1.16325e-18	merged_common	34.144	147.376	Intron (ENSMUST00000128120.1/110789, intron 5 of 7)	13	81051181	81078963	27783	1	319983	ENSMUST00000223730.1	96532	ENSMUSG00000097098	9330111N05Rik	RIKEN cDNA 9330111N05 gene
chr2	45181476	45182302	827	*	297	-1.74218	6.69616	1.18011e-18	merged_common	56.6919	189.657	Distal Intergenic	2	44983632	45117395	133764	2	24136	ENSMUST00000176438.8	-64081	ENSMUSG00000026872	Zeb2	zinc finger E-box binding homeobox 2
chr17	50736951	50737763	813	*	305	-1.50206	7.09922	1.21239e-18	merged_common	81.4696	230.76	Intron (ENSMUST00000024717.9/72238, intron 21 of 21)	17	50698688	50699443	756	1	12228	ENSMUST00000061681.8	38263	ENSMUSG00000022863	Btg3	B cell translocation gene 3
chr17	88580906	88582437	1532	*	832	0.90572	8.55558	1.22309e-18	merged_common	515.004	274.892	Exon (ENSMUST00000038551.7/73825, exon 20 of 22)	17	88578730	88588365	9636	1	73825	ENSMUST00000185400.1	2176	ENSMUSG00000034709	Ppp1r21	protein phosphatase 1, regulatory subunit 21
chr4	40818004	40818969	966	*	620	2.42545	5.73888	1.24324e-18	ATAC_PL_unique	123.777	23.0414	Intron (ENSMUST00000030121.12/14595, intron 2 of 5)	4	40850056	40850138	83	2	100628614	ENSMUST00000177794.1	31169	ENSMUSG00000096377	Mir5123	microRNA 5123
chr3	31060443	31062136	1694	*	878	1.06187	8.10538	1.27252e-18	merged_common	397.915	190.605	Distal Intergenic	3	31038966	31039028	63	1	102465610	ENSMUST00000184398.1	21477	ENSMUSG00000098890	Mir7008	microRNA 7008
chr1	80636866	80638152	1287	*	662	-0.99924	8.27882	1.28379e-18	merged_common	219.671	439.11	Intron (ENSMUST00000077946.11/210293, intron 2 of 55)	1	80501713	80665275	163563	2	210293	ENSMUST00000190983.6	27123	ENSMUSG00000038608	Dock10	dedicator of cytokinesis 10
chr13	112433103	112433952	850	*	422	-1.50167	7.11733	1.36481e-18	merged_common	82.5099	233.643	Intron (ENSMUST00000225524.1/ENSMUST00000225524.1, intron 2 of 2)	13	112464070	112510086	46017	1	16195	ENSMUST00000183663.7	-30118	ENSMUSG00000021756	Il6st	interleukin 6 signal transducer
chr11	48855892	48857297	1406	*	904	1.23225	7.66532	1.42046e-18	merged_common	311.145	132.44	Distal Intergenic	11	48847902	48852209	4308	1	94089	ENSMUST00000131270.1	7990	ENSMUSG00000040350	Trim7	tripartite motif-containing 7
chr3	87515391	87516286	896	*	497	1.4117	7.29025	1.42297e-18	merged_common	255.309	95.9626	Distal Intergenic	3	87525407	87540156	14750	1	27049	ENSMUST00000119109.7	-9121	ENSMUSG00000003382	Etv3	ets variant 3
chr17	26502739	26503936	1198	*	341	1.70792	6.74216	1.48685e-18	merged_common	193.491	59.2277	Downstream (1-2kb)	17	26506516	26507723	1208	2	19252	ENSMUST00000146077.1	3787	ENSMUSG00000024190	Dusp1	dual specificity phosphatase 1
chr9	107295499	107297102	1604	*	1087	1.27549	7.57859	1.56658e-18	merged_common	297.415	122.858	Promoter	9	107296026	107301987	5962	1	12700	ENSMUST00000085102.5	0	ENSMUSG00000032578	Cish	cytokine inducible SH2-containing protein
chr9	52373202	52373983	782	*	474	-2.32191	5.8614	1.56805e-18	merged_common	26.0001	129.999	Distal Intergenic	9	52111985	52168111	56127	2	244871	ENSMUST00000165519.1	-205091	ENSMUSG00000035164	Zc3h12c	zinc finger CCCH type containing 12C
chr17	24166635	24167678	1044	*	391	1.99166	6.30827	1.63099e-18	merged_common	158.035	39.7378	Promoter	17	24163866	24167029	3164	2	11984	ENSMUST00000151061.1	0	ENSMUSG00000024121	Atp6v0c	ATPase, H+ transporting, lysosomal V0 subunit C
chr15	83408116	83408993	878	*	292	2.00853	6.28076	1.69345e-18	merged_common	155.959	38.76	Intron (ENSMUST00000171436.7/23970, intron 1 of 10)	15	83388550	83423790	35241	2	23970	ENSMUST00000230816.1	14797	ENSMUSG00000016664	Pacsin2	protein kinase C and casein kinase substrate in neurons 2
chr7	35025685	35029196	3512	*	1488	-1.29327	7.52747	1.74625e-18	merged_common	117.852	288.836	Intron (ENSMUST00000075068.13/18624, intron 11 of 14)	7	35040482	35044707	4226	1	18624	ENSMUST00000160320.2	-11286	ENSMUSG00000063931	Pepd	peptidase D
chr2	178704259	178705201	943	*	502	-1.86843	6.47071	1.87521e-18	merged_common	46.4142	169.475	Distal Intergenic	2	178460630	178466572	5943	1	381409	ENSMUST00000176869.1	243629	ENSMUSG00000039155	Cdh26	cadherin-like 26
chr6	146685578	146687317	1740	*	1350	2.1257	6.10213	1.89708e-18	merged_common	143.507	32.8832	Distal Intergenic	6	146657218	146665403	8186	1	74925	ENSMUST00000146754.1	28360	ENSMUSG00000085238	4930479D17Rik	RIKEN cDNA 4930479D17 gene
chr15	86216459	86217052	594	*	330	2.45214	5.68915	1.89971e-18	ATAC_PL_unique	120.695	22.0557	Intron (ENSMUST00000063414.8/223754, intron 1 of 12)	15	86214459	86498503	284045	1	223754	ENSMUST00000063414.8	2000	ENSMUSG00000051864	Tbc1d22a	TBC1 domain family, member 22a
chr4	115856971	115858197	1227	*	508	1.16427	7.82586	1.93173e-18	merged_common	339.671	151.558	Promoter	4	115857032	115878664	21633	1	17346	ENSMUST00000152888.7	0	ENSMUSG00000028708	Mknk1	MAP kinase-interacting serine/threonine kinase 1
chr11	76587047	76588709	1663	*	775	1.1835	7.77987	1.99592e-18	merged_common	331.214	145.828	Intron (ENSMUST00000155035.7/109934, intron 1 of 3)	11	76479003	76577727	98725	2	109934	ENSMUST00000176179.7	-9320	ENSMUSG00000017631	Abr	active BCR-related gene
chr15	59759520	59760081	562	*	294	1.73332	6.68214	2.00034e-18	merged_common	187.247	56.3163	Distal Intergenic	15	59788417	59794959	6543	2	100503021	ENSMUST00000228865.1	34878	ENSMUSG00000115426	Gm19510	predicted gene, 19510
chr2	84530547	84531979	1433	*	902	-1.43801	7.22364	2.04002e-18	merged_common	90.8009	246.022	Promoter	2	84501171	84531322	30152	2	672763	ENSMUST00000139492.1	0	ENSMUSG00000087362	Gm13710	predicted gene 13710
chr11	75651012	75652321	1310	*	512	1.53898	7.03009	2.0708e-18	merged_common	222.796	76.6705	Promoter	11	75651510	75673910	22401	1	17913	ENSMUST00000069057.12	0	ENSMUSG00000017774	Myo1c	myosin IC
chr5	64612036	64612795	760	*	216	1.53898	7.03009	2.0708e-18	merged_common	222.796	76.6705	Distal Intergenic	5	64593857	64610700	16844	2	100042198	ENSMUST00000198582.4	-1336	ENSMUSG00000105402	Gm3716	predicted gene 3716
chr9	29647483	29648252	770	*	490	-2.42438	5.73304	2.09744e-18	ATAC_PP_unique	22.9568	123.232	Intron (ENSMUST00000075069.10/235106, intron 1 of 7)	9	28996012	29412204	416193	2	235106	ENSMUST00000115237.7	-235279	ENSMUSG00000059974	Ntm	neurotrimin
chr1	148868870	148869584	715	*	440	-1.89201	6.41724	2.12399e-18	merged_common	44.3615	164.648	Distal Intergenic	1	149886184	149902199	16016	2	18783	ENSMUST00000155438.1	1032615	ENSMUSG00000056220	Pla2g4a	phospholipase A2, group IVA (cytosolic, calcium-dependent)
chr6	137557464	137559761	2298	*	1525	1.00866	8.22889	2.14281e-18	merged_common	425.56	211.507	Intron (ENSMUST00000058210.12/13860, intron 2 of 21)	6	137477668	137571017	93350	2	13860	ENSMUST00000100841.8	11256	ENSMUSG00000015766	Eps8	epidermal growth factor receptor pathway substrate 8
chr12	3855695	3857029	1335	*	575	-1.00457	8.23206	2.14281e-18	merged_common	212.273	425.892	Intron (ENSMUST00000085826.12/13435, intron 3 of 3)	12	3861021	3866162	5142	1	13435	ENSMUST00000172816.1	-3992	ENSMUSG00000020661	Dnmt3a	DNA methyltransferase 3A
chr1	106369060	106369962	903	*	502	-1.25774	7.59642	2.259e-18	merged_common	125.153	299.267	Exon (ENSMUST00000061047.6/98432, exon 12 of 17)	1	106317238	106319015	1778	1	98432	ENSMUST00000124895.1	51822	ENSMUSG00000044340	Phlpp1	PH domain and leucine rich repeat protein phosphatase 1
chr17	28522393	28523528	1136	*	747	1.59583	6.92509	2.26762e-18	merged_common	211.279	69.8978	Exon (ENSMUST00000181029.2/ENSMUST00000181029.2, exon 1 of 1)	17	28399105	28517524	118420	2	14229	ENSMUST00000177939.7	-4869	ENSMUSG00000024222	Fkbp5	FK506 binding protein 5
chr16	7278959	7280361	1403	*	773	0.95586	8.37301	2.28751e-18	merged_common	461.741	238.043	Intron (ENSMUST00000230658.1/268859, intron 6 of 11)	16	7224310	7409997	185688	1	268859	ENSMUST00000231088.1	54649	ENSMUSG00000008658	Rbfox1	RNA binding protein, fox-1 homolog (C. elegans) 1
chr15	55380746	55382491	1746	*	1138	-0.93545	8.42909	2.38849e-18	merged_common	249.235	476.659	Exon (ENSMUST00000023053.11/ENSMUST00000023053.11, exon 11 of 48)	15	55448826	55519689	70864	1	12818	ENSMUST00000125416.1	-66335	ENSMUSG00000022371	Col14a1	collagen, type XIV, alpha 1
chr7	24462277	24463517	1241	*	513	1.34733	7.40902	2.40377e-18	merged_common	271.101	106.548	Promoter	7	24462484	24475967	13484	1	18793	ENSMUST00000002284.10	0	ENSMUSG00000046223	Plaur	plasminogen activator, urokinase receptor
chr4	54469744	54471810	2067	*	520	-1.0006	8.2372	2.40877e-18	merged_common	213.324	426.825	Distal Intergenic	4	54945048	55008314	63267	1	242466	ENSMUST00000133895.7	-473238	ENSMUSG00000060206	Zfp462	zinc finger protein 462
chr14	30255795	30256158	364	*	220	3.27823	4.83089	2.4828e-18	ATAC_PL_unique	88.6473	9.13734	Intron (ENSMUST00000112250.4/12289, intron 3 of 46)	14	30116324	30175391	59068	2	12289	ENSMUST00000224073.1	-80404	ENSMUSG00000015968	Cacna1d	calcium channel, voltage-dependent, L type, alpha 1D subunit
chr5	45496454	45499030	2577	*	1944	-0.99202	8.25413	2.55635e-18	merged_common	216.485	430.581	Promoter	5	45498230	45504829	6600	1	66988	ENSMUST00000135413.7	0	ENSMUSG00000039682	Lap3	leucine aminopeptidase 3
chr11	117986449	117987940	1492	*	620	1.60163	6.90789	2.56325e-18	merged_common	209.195	68.9307	Promoter	11	117986885	118024011	37127	1	74451	ENSMUST00000017859.9	0	ENSMUSG00000017715	Pgs1	phosphatidylglycerophosphate synthase 1
chr4	134164661	134168111	3451	*	876	2.31057	5.85583	2.61342e-18	merged_common	128.99	26.0019	3' UTR	4	134155901	134156921	1021	2	70012	ENSMUST00000145531.1	-7740	ENSMUSG00000037443	Cep85	centrosomal protein 85
chr18	4328367	4331259	2893	*	1301	2.6758	5.43441	2.71484e-18	ATAC_PL_unique	109.312	17.1069	Downstream (<1kb)	18	4333845	4335048	1204	2	26410	ENSMUST00000173708.1	3789	ENSMUSG00000024235	Map3k8	mitogen-activated protein kinase kinase kinase 8
chr2	144264452	144266552	2101	*	1632	-1.0505	8.09622	2.75823e-18	merged_common	190.147	393.841	Promoter	2	144265979	144266216	238	2	100313519	ENSMUST00000104526.1	0	ENSMUSG00000077714	Snord17	small nucleolar RNA, C/D box 17
chr17	17587031	17588261	1231	*	508	-0.75805	9.02354	2.84469e-18	merged_common	400.183	676.79	Intron (ENSMUST00000041047.3/240028, intron 1 of 17)	17	17527065	17578694	51630	2	240028	ENSMUST00000231515.1	-8337	ENSMUSG00000023845	Lnpep	leucyl/cystinyl aminopeptidase
chr12	38813588	38815415	1828	*	625	-1.48976	7.11125	2.97137e-18	merged_common	82.5027	231.703	Intron (ENSMUST00000160244.7/14009, intron 5 of 11)	12	38819543	38831216	11674	1	14009	ENSMUST00000220492.1	-4128	ENSMUSG00000004151	Etv1	ets variant 1
chr5	147748009	147748628	620	*	143	2.0732	6.15955	3.02444e-18	merged_common	146.642	34.8467	Exon (ENSMUST00000202338.1/ENSMUST00000202338.1, exon 2 of 2)	5	147561604	147726011	164408	2	14254	ENSMUST00000031653.11	-21998	ENSMUSG00000029648	Flt1	FMS-like tyrosine kinase 1
chr2	31446075	31446743	669	*	183	3.71363	4.47126	3.03831e-18	ATAC_PL_unique	80.3416	6.12388	Exon (ENSMUST00000142448.7/ENSMUST00000142448.7, exon 1 of 13)	2	31470207	31520672	50466	1	11898	ENSMUST00000102840.4	-23464	ENSMUSG00000076441	Ass1	argininosuccinate synthetase 1
chr4	81743596	81745013	1418	*	376	-1.64732	6.82131	3.06527e-18	merged_common	63.8958	200.154	Exon (ENSMUST00000144875.1/ENSMUST00000144875.1, exon 2 of 2)	4	81416540	81442815	26276	2	17475	ENSMUST00000142273.1	-300781	ENSMUSG00000028402	Mpdz	multiple PDZ domain protein
chr18	12759980	12761566	1587	*	466	-1.64732	6.82131	3.06527e-18	merged_common	63.8958	200.154	Intron (ENSMUST00000121808.7/64291, intron 10 of 13)	18	12762557	12767137	4581	2	64291	ENSMUST00000145777.1	5571	ENSMUSG00000044252	Osbpl1a	oxysterol binding protein-like 1A
chr14	17410570	17411625	1056	*	433	-1.3547	7.36751	3.11436e-18	merged_common	103.262	264.085	Distal Intergenic	14	17660261	17963125	302865	1	21834	ENSMUST00000224470.1	-248636	ENSMUSG00000021779	Thrb	thyroid hormone receptor beta
chr12	106016152	106017293	1142	*	673	-1.25313	7.59406	3.18604e-18	merged_common	125.148	298.301	Intron (ENSMUST00000072040.6/22367, intron 1 of 12)	12	106010316	106075409	65094	1	22367	ENSMUST00000021539.15	5836	ENSMUSG00000021115	Vrk1	vaccinia related kinase 1
chr11	116617656	116618197	542	*	307	2.62163	5.48864	3.23794e-18	ATAC_PL_unique	111.388	18.0988	Intron (ENSMUST00000103029.9/217344, intron 1 of 18)	11	116598165	116624200	26036	2	217344	ENSMUST00000103029.9	6003	ENSMUSG00000020806	Rhbdf2	rhomboid 5 homolog 2
chr15	78927994	78928568	575	*	214	1.79158	6.55353	3.41473e-18	merged_common	174.771	50.4835	Exon (ENSMUST00000089377.5/16852, exon 2 of 4)	15	78926726	78930191	3466	1	16852	ENSMUST00000229159.1	1268	ENSMUSG00000068220	Lgals1	lectin, galactose binding, soluble 1
chr5	136458061	136459239	1179	*	719	1.27352	7.54359	3.60627e-18	merged_common	290.089	119.995	Intron (ENSMUST00000176216.8/13047, intron 2 of 22)	5	136375716	136375803	88	2	723975	ENSMUST00000200230.1	-82258	ENSMUSG00000106479	Mir721	microRNA 721
chr16	7371233	7372225	993	*	535	-1.46002	7.1671	3.64057e-18	merged_common	86.6477	238.378	Intron (ENSMUST00000056416.8/268859, intron 12 of 14)	16	7352970	7409969	57000	1	268859	ENSMUST00000231031.1	18263	ENSMUSG00000008658	Rbfox1	RNA binding protein, fox-1 homolog (C. elegans) 1
chr14	49427316	49428891	1576	*	1048	-1.42154	7.2317	3.74743e-18	merged_common	91.8323	245.992	Intron (ENSMUST00000138884.7/75288, intron 1 of 8)	14	49317055	49525853	208799	2	75288	ENSMUST00000146164.1	96962	ENSMUSG00000021852	Slc35f4	solute carrier family 35, member F4
chr4	129513047	129513828	782	*	497	1.70047	6.71477	3.86588e-18	merged_common	189.362	58.2641	Promoter	4	129513581	129515985	2405	1	17357	ENSMUST00000062356.6	0	ENSMUSG00000047945	Marcksl1	MARCKS-like 1
chr11	68871631	68872160	530	*	303	2.72067	5.37073	3.87203e-18	ATAC_PL_unique	106.231	16.1157	Promoter	11	68829303	68871858	42556	2	83431	ENSMUST00000101017.8	0	ENSMUSG00000018736	Ndel1	nudE neurodevelopment protein 1 like 1
chr9	119980770	119984533	3764	*	2995	1.43145	7.19522	3.98906e-18	merged_common	240.675	89.2323	Promoter	9	119971163	119984443	13281	2	215418	ENSMUST00000035101.8	0	ENSMUSG00000032515	Csrnp1	cysteine-serine-rich nuclear protein 1
chr16	76532083	76533443	1361	*	868	-1.33234	7.39924	4.03116e-18	merged_common	106.379	267.874	Distal Intergenic	16	76548795	76551224	2430	1	102632730	ENSMUST00000232268.1	-15352	NA	Gm30726	predicted gene, 30726
chr18	54899249	54903335	4087	*	3482	-0.7879	8.90561	4.03211e-18	merged_common	364.977	630.154	Exon (ENSMUST00000064763.5/269023, exon 4 of 10)	18	54888045	54990180	102136	2	269023	ENSMUST00000064763.5	86845	ENSMUSG00000052713	Zfp608	zinc finger protein 608
chr1	143998876	144008106	9231	*	5394	-0.52825	10.0375	4.36924e-18	merged_common	875.119	1262.08	Promoter	1	143999338	144004161	4824	2	19735	ENSMUST00000127206.7	0	ENSMUSG00000026360	Rgs2	regulator of G-protein signaling 2
chr9	31996436	31998332	1897	*	1337	-1.25422	7.57026	4.41849e-18	merged_common	123.054	293.531	Intron (ENSMUST00000216368.1/ENSMUST00000216368.1, intron 1 of 3)	9	31846044	31913462	67419	2	12023	ENSMUST00000116615.4	-82974	ENSMUSG00000032033	Barx2	BarH-like homeobox 2
chr2	167860303	167861092	790	*	432	1.50573	7.06713	4.50318e-18	merged_common	225.971	79.5762	Intron (ENSMUST00000142937.1/ENSMUST00000142937.1, intron 1 of 1)	2	167932057	167974737	42681	1	19246	ENSMUST00000147210.7	-70965	ENSMUSG00000027540	Ptpn1	protein tyrosine phosphatase, non-receptor type 1
chr4	150544306	150545351	1046	*	721	1.20059	7.70082	4.65701e-18	merged_common	315.417	137.237	Intron (ENSMUST00000105682.8/68703, intron 11 of 22)	4	150569588	150570495	908	1	68703	ENSMUST00000142379.1	-24237	ENSMUSG00000039852	Rere	arginine glutamic acid dipeptide (RE) repeats
chr10	37258151	37260210	2060	*	1112	-0.90148	8.51261	4.7765e-18	merged_common	267.217	499.157	Distal Intergenic	10	37133375	37138920	5546	2	17118	ENSMUST00000092584.5	-119231	ENSMUSG00000069662	Marcks	myristoylated alanine rich protein kinase C substrate
chr18	60803079	60804092	1014	*	596	2.04348	6.1848	4.77848e-18	merged_common	147.701	35.8291	Promoter	18	60803848	60812646	8799	1	16149	ENSMUST00000050487.14	0	ENSMUSG00000024610	Cd74	CD74 antigen (invariant polypeptide of major histocompatibility complex, class II antigen-associated)
chr2	90545198	90545692	495	*	193	2.21239	5.96204	4.86443e-18	merged_common	134.199	28.9571	Intron (ENSMUST00000168621.2/19271, intron 1 of 23)	2	90432889	90580647	147759	2	19271	ENSMUST00000168621.2	34955	ENSMUSG00000025314	Ptprj	protein tyrosine phosphatase, receptor type, J
chr8	109750333	109751100	768	*	476	1.77265	6.57169	4.87919e-18	merged_common	175.827	51.4595	Distal Intergenic	8	109733516	109737739	4224	2	52335	ENSMUST00000212726.1	-12594	ENSMUSG00000069895	Atxn1l	ataxin 1-like
chr1	180849427	180849721	295	*	48	2.06308	6.1546	4.88564e-18	ATAC_PL_unique	145.628	34.8494	Distal Intergenic	1	180851127	180868113	16987	1	208768	ENSMUST00000038091.7	-1406	ENSMUSG00000038806	Sde2	SDE2 telomere maintenance homolog (S. pombe)
chr4	19893781	19896281	2501	*	2030	-0.94102	8.39461	5.07906e-18	merged_common	242.88	466.302	Intron (ENSMUST00000029900.5/242341, intron 2 of 7)	4	19890832	19916940	26109	2	242341	ENSMUST00000128605.1	20659	ENSMUSG00000028238	Atp6v0d2	ATPase, H+ transporting, lysosomal V0 subunit D2
chr18	60637888	60639189	1302	*	528	1.06489	8.03327	5.24807e-18	merged_common	378.911	181.123	Intron (ENSMUST00000143275.2/104027, intron 1 of 2)	18	60593990	60629853	35864	2	104027	ENSMUST00000130360.1	-8035	ENSMUSG00000043079	Synpo	synaptopodin
chr4	106296582	106297165	584	*	231	-2.44319	5.67712	5.43364e-18	merged_common	21.9405	119.322	Distal Intergenic	4	106316213	106441317	125105	1	329908	ENSMUST00000165709.7	-19048	ENSMUSG00000028514	Usp24	ubiquitin specific peptidase 24
chr10	21222659	21223144	486	*	305	-3.10102	4.9915	5.49848e-18	ATAC_PP_unique	10.8603	93.184	Intron (ENSMUST00000217285.1/ENSMUST00000217285.1, intron 2 of 2)	10	21186947	21188618	1672	1	102636600	ENSMUST00000216598.1	35712	ENSMUSG00000111005	Gm33619	predicted gene, 33619
chr10	25331213	25332252	1040	*	660	1.12458	7.87708	5.5379e-18	merged_common	347.139	159.21	Distal Intergenic	10	25284024	25307870	23847	2	432442	ENSMUST00000176231.1	-23343	ENSMUSG00000039166	Akap7	A kinase (PRKA) anchor protein 7
chr6	148533953	148534890	938	*	595	-1.47782	7.08684	5.78945e-18	merged_common	81.4549	226.874	Distal Intergenic	6	148606786	148609733	2948	2	622319	ENSMUST00000024796.6	74843	ENSMUSG00000070995	Gm6313	predicted gene 6313
chr11	70237259	70238456	1198	*	677	0.97752	8.27672	5.97615e-18	merged_common	435.183	221.009	Promoter	11	70235206	70237853	2648	2	104457	ENSMUST00000108575.8	0	ENSMUSG00000020831	0610010K14Rik	RIKEN cDNA 0610010K14 gene
chr2	30264990	30266963	1974	*	827	1.44723	7.15559	6.1597e-18	merged_common	235.438	86.3411	Promoter	2	30266203	30282148	15946	1	227696	ENSMUST00000154647.7	0	ENSMUSG00000079484	Phyhd1	phytanoyl-CoA dioxygenase domain containing 1
chr19	10289526	10291037	1512	*	809	1.25503	7.56858	6.23039e-18	merged_common	293.272	122.876	Intron (ENSMUST00000039327.10/269060, intron 1 of 19)	19	10245268	10304857	59590	2	269060	ENSMUST00000125567.7	13820	ENSMUSG00000035735	Dagla	diacylglycerol lipase, alpha
chr17	48300110	48301409	1300	*	901	1.41318	7.21699	6.32705e-18	merged_common	242.792	91.1645	Promoter	17	48300355	48306566	6212	1	328833	ENSMUST00000233602.1	0	ENSMUSG00000071068	Treml2	triggering receptor expressed on myeloid cells-like 2
chr13	73458294	73459881	1588	*	1035	-1.05596	8.05841	6.52095e-18	merged_common	184.878	384.38	Distal Intergenic	13	73467197	73516422	49226	1	210992	ENSMUST00000022099.14	-7316	ENSMUSG00000021608	Lpcat1	lysophosphatidylcholine acyltransferase 1
chr17	63092091	63093704	1614	*	964	-1.40527	7.23967	6.82999e-18	merged_common	92.8632	245.964	Intron (ENSMUST00000024761.12/50758, intron 7 of 8)	17	62604184	62881317	277134	2	13640	ENSMUST00000076840.11	-210774	ENSMUSG00000048915	Efna5	ephrin A5
chrX	13631547	13633085	1539	*	556	-1.78097	6.57812	6.91961e-18	merged_common	51.5405	177.123	Promoter	20	13632089	13640856	8768	1	23890	ENSMUST00000041708.9	0	ENSMUSG00000040229	Gpr34	G protein-coupled receptor 34
chr5	43047917	43049216	1300	*	713	1.27041	7.5189	7.06006e-18	merged_common	284.859	118.086	Distal Intergenic	5	43233170	43289724	56555	1	231207	ENSMUST00000169035.7	-183954	ENSMUSG00000039782	Cpeb2	cytoplasmic polyadenylation element binding protein 2
chr17	87795886	87798391	2506	*	620	-1.31824	7.40614	7.06395e-18	merged_common	107.413	267.846	Promoter	17	87745801	87797994	52194	2	210741	ENSMUST00000055221.8	0	ENSMUSG00000050138	Kcnk12	potassium channel, subfamily K, member 12
chr5	139381951	139383155	1205	*	947	2.25727	5.88306	7.54989e-18	merged_common	129.042	26.9914	Intron (ENSMUST00000138631.1/80290, intron 1 of 1)	5	139380581	139396415	15835	1	80290	ENSMUST00000051293.7	1370	ENSMUSG00000044197	Gpr146	G protein-coupled receptor 146
chr2	167421135	167422319	1185	*	486	1.12431	7.85961	7.78718e-18	merged_common	342.929	157.309	Promoter	2	167421712	167477000	55289	1	77031	ENSMUST00000047815.12	0	ENSMUSG00000039463	Slc9a8	solute carrier family 9 (sodium/hydrogen exchanger), member 8
chr4	6414743	6416372	1630	*	735	-0.66879	9.34493	7.87432e-18	merged_common	515.752	819.912	Exon (ENSMUST00000029910.11/18201, exon 22 of 31)	4	6409019	6423988	14970	2	18201	ENSMUST00000156078.1	7616	ENSMUSG00000028245	Nsmaf	neutral sphingomyelinase (N-SMase) activation associated factor
chr6	110463403	110464045	643	*	185	-2.04788	6.15955	7.8818e-18	merged_common	35.1538	145.36	Distal Intergenic	6	110645581	111497090	851510	1	108073	ENSMUST00000174018.7	-181536	ENSMUSG00000056755	Grm7	glutamate receptor, metabotropic 7
chr10	96337820	96338448	629	*	408	1.71795	6.6496	8.02863e-18	merged_common	182.098	55.3544	Intron (ENSMUST00000218518.1/ENSMUST00000218518.1, intron 1 of 2)	10	96226207	96248708	22502	1	74881	ENSMUST00000218720.1	111613	ENSMUSG00000112762	4930459C07Rik	RIKEN cDNA 4930459C07 gene
chr2	156324081	156324634	554	*	293	2.10495	6.09197	8.14025e-18	merged_common	141.479	32.8881	Intron (ENSMUST00000037096.8/70873, intron 2 of 12)	2	156333861	156339266	5406	1	70873	ENSMUST00000154227.1	-9227	ENSMUSG00000038085	Cnbd2	cyclic nucleotide binding domain containing 2
chr11	115412646	115414093	1448	*	770	1.38194	7.27567	9.11605e-18	merged_common	250.148	95.9825	3' UTR	11	115410160	115410908	749	1	68572	ENSMUST00000134386.1	2486	ENSMUSG00000018858	Mrpl58	mitochondrial ribosomal protein L58
chr2	131337593	131338090	498	*	199	2.75567	5.2967	9.50209e-18	merged_common	102.149	15.125	Intron (ENSMUST00000059372.10/51902, intron 1 of 5)	2	131298067	131328988	30922	2	51902	ENSMUST00000110194.7	-8605	ENSMUSG00000048911	Rnf24	ring finger protein 24
chr16	18411256	18413581	2326	*	857	-1.06051	8.02742	9.60706e-18	merged_common	180.664	376.805	Promoter	16	18406886	18413494	6609	2	12846	ENSMUST00000165430.7	0	ENSMUSG00000000326	Comt	catechol-O-methyltransferase
chr1	152599068	152600046	979	*	426	1.37134	7.29903	9.69557e-18	merged_common	253.299	97.9083	Intron (ENSMUST00000111859.7/19731, intron 3 of 18)	1	152557543	152592759	35217	2	19731	ENSMUST00000128251.7	-6309	ENSMUSG00000026482	Rgl1	ral guanine nucleotide dissociation stimulator,-like 1
chr1	166097997	166098972	976	*	346	-1.28043	7.49505	9.76481e-18	merged_common	115.747	281.163	3' UTR	1	166098153	166127896	29744	2	240892	ENSMUST00000085992.3	28924	ENSMUSG00000026564	Dusp27	dual specificity phosphatase 27 (putative)
chr5	53994938	53995897	960	*	482	1.15562	7.78493	1.00209e-17	merged_common	329.182	147.761	Distal Intergenic	5	53998499	54121057	122559	1	116873	ENSMUST00000117661.8	-2602	ENSMUSG00000039156	Stim2	stromal interaction molecule 2
chr11	83066381	83067726	1346	*	484	1.51182	7.0168	1.00454e-17	merged_common	218.685	76.6859	Intron (ENSMUST00000038038.7/20556, intron 1 of 1)	11	83065112	83070678	5567	1	20556	ENSMUST00000038038.7	1269	ENSMUSG00000072620	Slfn2	schlafen 2
chr2	167939178	167940273	1096	*	617	2.88443	5.15757	1.02133e-17	ATAC_PL_unique	96.9914	13.1351	Intron (ENSMUST00000147210.7/19246, intron 1 of 6)	2	167932395	167967733	35339	1	19246	ENSMUST00000124039.7	6783	ENSMUSG00000027540	Ptpn1	protein tyrosine phosphatase, non-receptor type 1
chr11	69418437	69419703	1267	*	582	1.36109	7.32198	1.02606e-17	merged_common	256.448	99.8323	Downstream (1-2kb)	11	69398508	69413675	15168	2	216850	ENSMUST00000094077.4	-4762	ENSMUSG00000018476	Kdm6b	KDM1 lysine (K)-specific demethylase 6B
chr7	28380224	28384091	3868	*	2887	0.74835	9.01464	1.0436e-17	merged_common	670.371	399.061	Promoter	7	28376784	28380253	3470	2	22695	ENSMUST00000051241.6	0	ENSMUSG00000044786	Zfp36	zinc finger protein 36
chr12	119356854	119357975	1122	*	673	-1.95458	6.2714	1.1012e-17	merged_common	39.2361	152.08	Intron (ENSMUST00000222784.1/238455, intron 5 of 8)	12	119327608	119466934	139327	1	238455	ENSMUST00000221917.1	29246	ENSMUSG00000041886	Macc1	metastasis associated in colon cancer 1
chr11	119874628	119874734	107	*	47	2.54528	5.52764	1.10772e-17	ATAC_PL_unique	111.452	19.0934	Intron (ENSMUST00000026671.12/74370, intron 24 of 33)	11	119857444	119884967	27524	1	74370	ENSMUST00000131217.1	17184	ENSMUSG00000025583	Rptor	regulatory associated protein of MTOR, complex 1
chr13	73445104	73445878	775	*	631	-1.48422	7.05279	1.12787e-17	merged_common	79.3787	222.075	Distal Intergenic	13	73467197	73516422	49226	1	210992	ENSMUST00000022099.14	-21319	ENSMUSG00000021608	Lpcat1	lysophosphatidylcholine acyltransferase 1
chr2	44976386	44977059	674	*	182	1.56722	6.91109	1.14522e-17	merged_common	207.174	69.9126	Distal Intergenic	2	45001716	45022915	21200	2	24136	ENSMUST00000202432.3	45856	ENSMUSG00000026872	Zeb2	zinc finger E-box binding homeobox 2
chr12	15357601	15358454	854	*	464	-1.53169	6.95906	1.15717e-17	merged_common	73.1718	211.557	Distal Intergenic	12	15040194	15051598	11405	2	73972	ENSMUST00000220988.1	-306003	ENSMUSG00000113644	4930448C13Rik	RIKEN cDNA 4930448C13 gene
chr8	22932004	22932998	995	*	358	-1.78628	6.55164	1.17172e-17	merged_common	50.5101	174.222	Exon (ENSMUST00000110696.7/244349, exon 15 of 17)	8	22913786	22923645	9860	1	244349	ENSMUST00000130718.1	18218	ENSMUSG00000031540	Kat6a	K(lysine) acetyltransferase 6A
chr9	32715774	32716744	971	*	480	-1.04525	8.05293	1.18697e-17	merged_common	184.862	381.504	Intron (ENSMUST00000183879.1/23871, intron 3 of 3)	9	32696384	32754428	58045	1	23871	ENSMUST00000184364.1	19390	ENSMUSG00000032035	Ets1	E26 avian leukemia oncogene 1, 5' domain
chr1	120451286	120452134	849	*	370	1.87153	6.41585	1.22223e-17	merged_common	163.326	44.6344	Distal Intergenic	1	120490913	120504756	13844	2	17167	ENSMUST00000186432.2	52622	ENSMUSG00000026390	Marco	macrophage receptor with collagenous structure
chr13	106835891	106837052	1162	*	502	-1.17602	7.72559	1.23654e-17	merged_common	140.807	318.158	Promoter	13	106811888	106836321	24434	2	76582	ENSMUST00000191312.1	0	ENSMUSG00000042590	Ipo11	importin 11
chr15	27960014	27960976	963	*	611	-1.42575	7.18388	1.2388e-17	merged_common	88.7088	238.32	Intron (ENSMUST00000090247.6/223435, intron 1 of 56)	15	27919133	27995363	76231	2	223435	ENSMUST00000228950.1	34387	ENSMUSG00000022263	Trio	triple functional domain (PTPRF interacting)
chr14	54232907	54233957	1051	*	567	1.50067	7.02933	1.29527e-17	merged_common	219.742	77.6544	Downstream (1-2kb)	14	54239661	54253914	14254	2	13135	ENSMUST00000128231.1	19957	ENSMUSG00000022174	Dad1	defender against cell death 1
chr2	32665145	32666006	862	*	438	2.16452	5.98649	1.32961e-17	merged_common	134.247	29.9447	Intron (ENSMUST00000113272.7/13805, intron 2 of 13)	2	32672843	32673745	903	1	13805	ENSMUST00000192455.1	-6837	ENSMUSG00000026814	Eng	endoglin
chr15	88508733	88509895	1163	*	450	-1.10559	7.89982	1.34271e-17	merged_common	162.808	350.341	Distal Intergenic	15	88600302	88601669	1368	1	70073	ENSMUST00000066949.8	-90407	ENSMUSG00000054117	Zdhhc25	zinc finger, DHHC domain containing 25
chr11	62550359	62551860	1502	*	786	1.14634	7.79885	1.35618e-17	merged_common	331.306	149.674	Promoter	11	62551171	62553213	2043	1	22187	ENSMUST00000019649.3	0	ENSMUSG00000019505	Ubb	ubiquitin B
chr4	126131376	126132465	1090	*	568	1.25977	7.51369	1.41091e-17	merged_common	282.788	118.095	Intron (ENSMUST00000116286.8/74178, intron 8 of 12)	4	126128819	126132798	3980	1	74178	ENSMUST00000134369.1	2557	ENSMUSG00000042608	Stk40	serine/threonine kinase 40
chr6	129333525	129334490	966	*	435	-0.90385	8.46721	1.43134e-17	merged_common	258.727	484.091	Distal Intergenic	6	129322164	129331796	9633	2	381816	ENSMUST00000051283.7	-1729	ENSMUSG00000047720	4922502D21Rik	RIKEN cDNA 4922502D21 gene
chr15	30614883	30617611	2729	*	2181	-1.25348	7.53256	1.43545e-17	merged_common	119.911	285.887	Intron (ENSMUST00000081728.6/18163, intron 3 of 22)	15	30646532	30671124	24593	1	18163	ENSMUST00000228753.1	-28921	ENSMUSG00000022240	Ctnnd2	catenin (cadherin associated protein), delta 2
chr16	39191910	39193625	1716	*	579	-1.25348	7.53256	1.43545e-17	merged_common	119.911	285.887	Distal Intergenic	16	39187463	39188906	1444	2	102640746	ENSMUST00000231748.1	-3004	ENSMUSG00000116965	Gm36742	predicted gene, 36742
chr17	78400182	78401636	1455	*	562	-1.12296	7.85163	1.4645e-17	merged_common	156.514	340.878	Promoter	17	78377886	78401430	23545	2	225020	ENSMUST00000234601.1	0	ENSMUSG00000056121	Fez2	fasciculation and elongation protein zeta 2 (zygin II)
chr4	9009441	9010228	788	*	415	1.19782	7.64846	1.49724e-17	merged_common	303.883	132.473	Distal Intergenic	4	8855231	8858618	3388	1	320790	ENSMUST00000222546.1	154210	ENSMUSG00000041235	Chd7	chromodomain helicase DNA binding protein 7
chr5	120557980	120559517	1538	*	926	-1.19836	7.64831	1.49724e-17	merged_common	132.434	303.908	Intron (ENSMUST00000046426.9/252972, intron 3 of 27)	5	120582899	120588594	5696	2	252972	ENSMUST00000202072.1	29077	ENSMUSG00000032741	Tpcn1	two pore channel 1
chr11	120572393	120574156	1764	*	640	0.81551	8.75159	1.51285e-17	merged_common	571.791	324.896	Promoter	11	120560298	120573253	12956	2	18453	ENSMUST00000026122.10	0	ENSMUSG00000025130	P4hb	prolyl 4-hydroxylase, beta polypeptide
chr7	139971377	139971985	609	*	209	1.28151	7.46472	1.58653e-17	merged_common	275.417	113.297	Intron (ENSMUST00000139218.1/ENSMUST00000139218.1, intron 2 of 4)	7	139972442	139978719	6278	2	381933	ENSMUST00000209335.1	6734	ENSMUSG00000073795	6430531B16Rik	RIKEN cDNA 6430531B16 gene
chr1	149945967	149947543	1577	*	1212	1.26829	7.4824	1.62604e-17	merged_common	277.539	115.221	Intron (ENSMUST00000070200.14/18783, intron 1 of 17)	1	149932575	149961255	28681	2	18783	ENSMUST00000134676.1	13712	ENSMUSG00000056220	Pla2g4a	phospholipase A2, group IVA (cytosolic, calcium-dependent)
chr9	45300133	45301149	1017	*	542	1.50934	6.99735	1.70455e-17	merged_common	215.571	75.7241	Distal Intergenic	9	45319100	45347581	28482	1	214531	ENSMUST00000034597.7	-17951	ENSMUSG00000037129	Tmprss13	transmembrane protease, serine 13
chr3	41586928	41588242	1315	*	847	-1.21992	7.60106	1.76218e-17	merged_common	127.213	296.322	Intron (ENSMUST00000026865.14/269424, intron 2 of 10)	3	41591673	41600171	8499	1	269424	ENSMUST00000195322.5	-3431	ENSMUSG00000025764	Jade1	jade family PHD finger 1
chr7	140953640	140954551	912	*	663	2.32927	5.75191	1.79647e-17	ATAC_PL_unique	120.806	24.0385	Intron (ENSMUST00000211129.1/80876, intron 1 of 1)	7	140949222	140955937	6716	2	80876	ENSMUST00000211129.1	1386	ENSMUSG00000060591	Ifitm2	interferon induced transmembrane protein 2
chr5	64298148	64298757	610	*	411	2.29578	5.79319	1.90133e-17	ATAC_PL_unique	122.878	25.025	Promoter	5	64298530	64351481	52952	1	57915	ENSMUST00000140960.2	0	ENSMUSG00000029174	Tbc1d1	TBC1 domain family, member 1
chr10	117807231	117808768	1538	*	1012	2.29578	5.79319	1.90133e-17	merged_common	122.878	25.025	Distal Intergenic	10	117815660	117818540	2881	2	215449	ENSMUST00000220214.1	9772	ENSMUSG00000052681	Rap1b	RAS related protein 1b
chr2	33176463	33177258	796	*	240	1.49383	7.02599	1.91249e-17	merged_common	218.714	77.6587	Intron (ENSMUST00000131298.6/241308, intron 8 of 17)	2	33143307	33158170	14864	2	241308	ENSMUST00000138704.1	-18293	ENSMUSG00000038831	Ralgps1	Ral GEF with PH domain and SH3 binding motif 1
chr1	74381334	74381992	659	*	371	2.26416	5.83311	1.99029e-17	ATAC_PL_unique	124.949	26.0106	Promoter	1	74381651	74384173	2523	1	18173	ENSMUST00000133896.7	0	ENSMUSG00000026177	Slc11a1	solute carrier family 11 (proton-coupled divalent metal ion transporters), member 1
chr6	59023929	59025107	1179	*	657	-1.1165	7.8386	2.06062e-17	merged_common	155.455	337.057	Promoter	6	58932090	59024549	92460	2	58909	ENSMUST00000089860.11	0	ENSMUSG00000037709	Fam13a	family with sequence similarity 13, member A
chr2	46370883	46371433	551	*	217	2.23425	5.87179	2.06226e-17	merged_common	127.02	26.9958	Distal Intergenic	2	45696800	45698067	1268	1	69405	ENSMUST00000134308.1	674083	ENSMUSG00000086202	1700019E08Rik	RIKEN cDNA 1700019E08 gene
chr11	116852184	116854097	1914	*	1248	0.91186	8.41849	2.08064e-17	merged_common	469.317	249.442	Promoter	11	116849901	116853094	3194	2	20382	ENSMUST00000092404.12	0	ENSMUSG00000034120	Srsf2	serine/arginine-rich splicing factor 2
chr13	9894979	9895592	614	*	277	-1.77535	6.51628	2.16668e-17	merged_common	49.4742	169.361	Intron (ENSMUST00000187510.6/12671, intron 4 of 4)	13	9691049	9765330	74282	2	66505	ENSMUST00000157035.8	-129649	ENSMUSG00000021156	Zmynd11	zinc finger, MYND domain containing 11
chr6	120452808	120453716	909	*	518	2.15348	5.98109	2.17278e-17	merged_common	133.235	29.9472	Distal Intergenic	6	120463247	120483729	20483	1	16172	ENSMUST00000204239.2	-9531	ENSMUSG00000002897	Il17ra	interleukin 17 receptor A
chr12	111455499	111456518	1020	*	458	3.11299	4.89883	2.2097e-17	ATAC_PL_unique	87.7499	10.1425	Intron (ENSMUST00000221429.1/ENSMUST00000221429.1, intron 2 of 2)	12	111450519	111453626	3108	1	21928	ENSMUST00000127028.2	4980	ENSMUSG00000021281	Tnfaip2	tumor necrosis factor, alpha-induced protein 2
chr11	55022603	55023611	1009	*	556	1.57101	6.87257	2.211e-17	merged_common	201.981	67.9813	Intron (ENSMUST00000102727.2/11749, intron 1 of 24)	11	54990950	55033415	42466	2	11749	ENSMUST00000148298.1	9804	ENSMUSG00000018340	Anxa6	annexin A6
chr15	103370381	103370999	619	*	255	1.54747	6.92118	2.24204e-17	merged_common	207.205	70.8868	Distal Intergenic	15	103344286	103366763	22478	2	16402	ENSMUST00000023128.7	-3618	ENSMUSG00000000555	Itga5	integrin alpha 5 (fibronectin receptor alpha)
chr1	46921342	46922272	931	*	427	-0.98335	8.20676	2.25287e-17	merged_common	210.122	415.422	Distal Intergenic	1	46835640	46892852	57213	2	227059	ENSMUST00000186852.1	-28490	ENSMUSG00000025986	Slc39a10	solute carrier family 39 (zinc transporter), member 10
chr8	71691669	71694097	2429	*	1014	2.79474	5.21836	2.31362e-17	ATAC_PL_unique	98.0693	14.1329	5' UTR	8	71689214	71690575	1362	1	16336	ENSMUST00000034261.7	2455	ENSMUSG00000079019	Insl3	insulin-like 3
chr11	34009957	34011356	1400	*	1118	1.67656	6.67891	2.34544e-17	merged_common	183.189	57.3066	Intron (ENSMUST00000141450.1/76874, intron 4 of 4)	11	33641180	33993152	351973	2	70357	ENSMUST00000154760.1	-16805	ENSMUSG00000053519	Kcnip1	Kv channel-interacting protein 1
chr19	5473514	5474176	663	*	325	1.90388	6.33422	2.3495e-17	merged_common	156.082	41.7088	Promoter	19	5473973	5477578	3606	1	58859	ENSMUST00000167304.7	0	ENSMUSG00000024909	Efemp2	epidermal growth factor-containing fibulin-like extracellular matrix protein 2
chr7	64279330	64280149	820	*	442	-1.44724	7.08953	2.352e-17	merged_common	82.4764	224.902	Distal Intergenic	7	64287653	64303172	15520	1	233315	ENSMUST00000206732.1	-7504	ENSMUSG00000030522	Mtmr10	myotubularin related protein 10
chr6	28420834	28422206	1373	*	869	1.06146	7.97769	2.36842e-17	merged_common	364.158	174.485	Promoter	6	28416091	28421724	5634	2	74375	ENSMUST00000090511.3	0	ENSMUSG00000029708	Gcc1	golgi coiled coil 1
chr1	16059246	16060489	1244	*	671	-1.06015	7.97581	2.36842e-17	merged_common	174.337	363.519	Distal Intergenic	1	16065979	16081212	15234	2	75799	ENSMUST00000115367.7	20723	ENSMUSG00000067795	4930444P10Rik	RIKEN cDNA 4930444P10 gene
chr3	18641296	18642405	1110	*	609	-0.94417	8.31198	2.45964e-17	merged_common	229.11	440.826	Distal Intergenic	3	18468287	18480477	12191	2	73959	ENSMUST00000192010.1	-160819	ENSMUSG00000102699	4930433B08Rik	RIKEN cDNA 4930433B08 gene
chr4	45471592	45472614	1023	*	517	-1.18698	7.65389	2.45976e-17	merged_common	133.473	303.885	Intron (ENSMUST00000147926.7/230126, intron 1 of 4)	4	45423278	45482802	59525	2	230126	ENSMUST00000147926.7	10188	ENSMUSG00000044813	Shb	src homology 2 domain-containing transforming protein B
chr5	123906468	123907839	1372	*	672	0.9825	8.20962	2.5185e-17	merged_common	416.124	210.601	Promoter	5	123907175	123928835	21661	1	68184	ENSMUST00000023869.14	0	ENSMUSG00000023106	Denr	density-regulated protein
chr16	58545968	58546915	948	*	468	-1.37787	7.24178	2.58359e-17	merged_common	93.8864	243.996	Distal Intergenic	16	58469753	58524243	54491	2	54613	ENSMUST00000114358.8	-21725	ENSMUSG00000022747	St3gal6	ST3 beta-galactoside alpha-2,3-sialyltransferase 6
chr17	65679942	65680486	545	*	386	1.93426	6.28017	2.64287e-17	merged_common	151.934	39.7543	Intron (ENSMUST00000070673.8/106572, intron 5 of 6)	17	65637507	65642168	4662	2	213272	ENSMUST00000050236.6	-37774	ENSMUSG00000050612	Txndc2	thioredoxin domain containing 2 (spermatozoa)
chr19	21031491	21032505	1015	*	720	0.75523	8.94519	2.70349e-17	merged_common	640.389	379.4	Distal Intergenic	19	20783458	20954202	170745	2	13409	ENSMUST00000039500.3	-77289	ENSMUSG00000024749	Tmc1	transmembrane channel-like gene family 1
chr4	133812824	133814747	1924	*	797	0.95727	8.27296	2.70637e-17	merged_common	431.015	221.986	Distal Intergenic	4	133850557	133860930	10374	2	20111	ENSMUST00000173989.7	46183	ENSMUSG00000003644	Rps6ka1	ribosomal protein S6 kinase polypeptide 1
chr9	113928582	113929334	753	*	226	1.32602	7.34576	2.71748e-17	merged_common	257.561	102.733	Distal Intergenic	9	113930934	113977199	46266	1	22221	ENSMUST00000009885.13	-1600	ENSMUSG00000009741	Ubp1	upstream binding protein 1
chr3	152911856	152913534	1679	*	771	-1.11489	7.84751	2.74408e-17	merged_common	156.505	338.956	Intron (ENSMUST00000161596.5/329777, intron 14 of 14)	3	152975374	152982052	6679	2	26938	ENSMUST00000161757.1	68518	ENSMUSG00000039037	St6galnac5	ST6 (alpha-N-acetyl-neuraminyl-2,3-beta-galactosyl-1,3)-N-acetylgalactosaminide alpha-2,6-sialyltransferase 5
chr2	129338109	129338752	644	*	337	2.56805	5.46241	2.81826e-17	ATAC_PL_unique	107.369	18.1059	Distal Intergenic	2	129299610	129309972	10363	2	16175	ENSMUST00000028882.1	-28137	ENSMUSG00000027399	Il1a	interleukin 1 alpha
chr18	79293367	79294559	1193	*	366	-0.99923	8.15562	2.8521e-17	merged_common	201.691	403.167	Distal Intergenic	18	78750380	79109391	359012	2	240427	ENSMUST00000025430.10	-183976	ENSMUSG00000024548	Setbp1	SET binding protein 1
chr15	54929064	54929857	794	*	428	0.91865	8.3887	2.85884e-17	merged_common	460.809	243.77	Intron (ENSMUST00000226339.1/18606, intron 1 of 2)	15	54897737	54922613	24877	2	18606	ENSMUST00000228222.1	-6451	ENSMUSG00000022425	Enpp2	ectonucleotide pyrophosphatase/phosphodiesterase 2
chr5	125388627	125390635	2009	*	651	1.12821	7.81724	2.89928e-17	merged_common	333.454	152.55	Promoter	5	125385965	125390014	4050	2	22190	ENSMUST00000136312.1	0	ENSMUSG00000008348	Ubc	ubiquitin C
chr5	139014826	139015565	740	*	350	1.18783	7.64357	2.90866e-17	merged_common	301.808	132.482	Downstream (1-2kb)	5	139018666	139023810	5145	2	19085	ENSMUST00000139415.1	8245	ENSMUSG00000025855	Prkar1b	protein kinase, cAMP dependent regulatory, type I beta
chr6	37143118	37145446	2329	*	811	0.92679	8.36449	2.99385e-17	merged_common	454.421	239.038	Intron (ENSMUST00000101532.9/320127, intron 2 of 33)	6	37034608	37064510	29903	2	320127	ENSMUST00000146656.1	-78608	ENSMUSG00000038665	Dgki	diacylglycerol kinase, iota
chr6	127142851	127143801	951	*	467	2.28375	5.7873	3.16031e-17	merged_common	121.868	25.0272	Intron (ENSMUST00000000188.11/12444, intron 3 of 4)	6	127139093	127146688	7596	2	12444	ENSMUST00000201985.1	2887	ENSMUSG00000000184	Ccnd2	cyclin D2
chr9	70889072	70889500	429	*	329	2.28375	5.7873	3.16031e-17	merged_common	121.868	25.0272	Intron (ENSMUST00000034731.9/15450, intron 1 of 8)	9	70820852	70934613	113762	2	15450	ENSMUST00000214995.1	45113	ENSMUSG00000032207	Lipc	lipase, hepatic
chr2	32917461	32917916	456	*	228	2.28375	5.7873	3.16031e-17	merged_common	121.868	25.0272	Promoter	2	32918641	32922107	3467	1	227737	ENSMUST00000150875.1	-725	ENSMUSG00000026796	Fam129b	family with sequence similarity 129, member B
chr4	32170081	32171430	1350	*	472	-1.67127	6.68602	3.20443e-17	merged_common	57.6954	183.757	Distal Intergenic	4	32238804	32586104	347301	1	12014	ENSMUST00000108180.8	-67374	ENSMUSG00000040270	Bach2	BTB and CNC homology, basic leucine zipper transcription factor 2
chr9	65578680	65579634	955	*	385	1.70189	6.61629	3.21138e-17	merged_common	176.955	54.3929	Promoter	9	65552698	65579034	26337	2	102595	ENSMUST00000214740.1	0	ENSMUSG00000050721	Plekho2	pleckstrin homology domain containing, family O member 2
chr10	17660413	17661697	1285	*	592	-0.92458	8.3672	3.30591e-17	merged_common	239.671	454.927	Distal Intergenic	10	17723218	17725674	2457	1	17684	ENSMUST00000038107.8	-61521	ENSMUSG00000039910	Cited2	Cbp/p300-interacting transactivator, with Glu/Asp-rich carboxy-terminal domain, 2
chr2	122161235	122162138	904	*	502	2.22261	5.86608	3.40139e-17	merged_common	126.009	26.9979	Promoter	2	122160802	122179024	18223	1	70928	ENSMUST00000143088.1	433	ENSMUSG00000033368	Trim69	tripartite motif-containing 69
chr13	8838651	8840338	1688	*	775	-0.80869	8.74157	3.42508e-17	merged_common	323.411	566.493	Intron (ENSMUST00000054251.12/207615, intron 9 of 13)	13	8835389	8837234	1846	2	207615	ENSMUST00000177409.1	-1417	ENSMUSG00000021147	Wdr37	WD repeat domain 37
chr11	62997550	62998340	791	*	264	-2.05499	6.07646	3.45117e-17	merged_common	33.1047	137.564	Intron (ENSMUST00000153180.7/74884, intron 2 of 2)	11	62990453	63004128	13676	2	74884	ENSMUST00000153180.7	5788	ENSMUSG00000087604	Cdrt4os1	CMT1A duplicated region transcript 4, opposite strand 1
chr10	80061140	80062030	891	*	350	3.83962	4.27537	3.49254e-17	ATAC_PL_unique	73.2715	5.11793	Exon (ENSMUST00000219260.1/216161, exon 21 of 33)	10	80055998	80056363	366	1	625249	ENSMUST00000136081.1	5142	ENSMUSG00000075706	Gpx4	glutathione peroxidase 4
chr18	60624120	60625772	1653	*	1378	2.09521	6.04373	3.50621e-17	merged_common	136.366	31.9142	Promoter	18	60600206	60624236	24031	2	104027	ENSMUST00000155195.2	0	ENSMUSG00000043079	Synpo	synaptopodin
chr7	90199419	90201653	2235	*	1051	2.11822	6.01014	3.53848e-17	merged_common	134.294	30.932	Exon (ENSMUST00000207847.1/ENSMUST00000207847.1, exon 1 of 1)	7	90195232	90197006	1775	1	233489	ENSMUST00000208127.1	4187	ENSMUSG00000039361	Picalm	phosphatidylinositol binding clathrin assembly protein
chr13	18781130	18781924	795	*	324	-1.33905	7.29996	3.5578e-17	merged_common	99.074	250.642	Intron (ENSMUST00000072961.5/218035, intron 4 of 28)	13	18779843	18827655	47813	1	218035	ENSMUST00000222813.1	1287	ENSMUSG00000041236	Vps41	VPS41 HOPS complex subunit
chr10	83301531	83302264	734	*	282	1.6684	6.67492	3.57679e-17	merged_common	182.167	57.3102	Intron (ENSMUST00000039956.5/338365, intron 4 of 10)	10	83301016	83304375	3360	2	338365	ENSMUST00000139329.1	2111	ENSMUSG00000034591	Slc41a2	solute carrier family 41, member 2
chr2	163228890	163229869	980	*	375	-0.99096	8.16643	3.58314e-17	merged_common	203.791	405.037	Intron (ENSMUST00000109428.8/269389, intron 1 of 8)	2	163225454	163323102	97649	1	269389	ENSMUST00000165937.7	3436	ENSMUSG00000074607	Tox2	TOX high mobility group box family member 2
chr7	125503124	125503232	109	*	38	2.45964	5.55817	3.62777e-17	ATAC_PL_unique	110.507	20.0892	Distal Intergenic	7	125467640	125491596	23957	2	67711	ENSMUST00000033006.13	-11528	ENSMUSG00000030750	Nsmce1	NSE1 homolog, SMC5-SMC6 complex component
chr12	85569506	85570595	1090	*	493	2.45964	5.55817	3.62777e-17	ATAC_PL_unique	110.507	20.0892	Distal Intergenic	12	85599027	85639878	40852	1	81703	ENSMUST00000177587.8	-28432	ENSMUSG00000034271	Jdp2	Jun dimerization protein 2
chr8	36867059	36868335	1277	*	725	-1.60495	6.79967	3.64065e-17	merged_common	63.8757	194.3	Intron (ENSMUST00000163663.2/50768, intron 2 of 17)	8	36849126	36952357	103232	2	50768	ENSMUST00000036104.10	84022	ENSMUSG00000031523	Dlc1	deleted in liver cancer 1
chr18	88923845	88925263	1419	*	705	-1.14037	7.76022	3.68578e-17	merged_common	146.021	321.886	Intron (ENSMUST00000147313.1/54607, intron 1 of 2)	18	88870765	88927481	56717	2	54607	ENSMUST00000147313.1	2218	ENSMUSG00000056153	Socs6	suppressor of cytokine signaling 6
chr4	8917076	8917627	552	*	238	1.36835	7.23989	3.73015e-17	merged_common	242.874	94.0734	Distal Intergenic	4	8855231	8858618	3388	1	320790	ENSMUST00000222546.1	61845	ENSMUSG00000041235	Chd7	chromodomain helicase DNA binding protein 7
chr1	70855550	70856479	930	*	552	-1.57181	6.8513	3.75866e-17	merged_common	66.9678	199.08	Intron (ENSMUST00000053922.11/320460, intron 3 of 3)	1	70725923	70882489	156567	1	320460	ENSMUST00000162182.1	129627	ENSMUSG00000045648	Vwc2l	von Willebrand factor C domain-containing protein 2-like
chr8	39642432	39643274	843	*	288	1.56925	6.85109	3.75866e-17	merged_common	198.875	67.0175	Promoter	8	39581685	39642620	60936	2	20288	ENSMUST00000026021.13	0	ENSMUSG00000025044	Msr1	macrophage scavenger receptor 1
chr1	95450363	95451795	1433	*	640	-1.15664	7.72641	3.82492e-17	merged_common	141.837	316.208	Distal Intergenic	1	95313628	95327945	14318	1	67698	ENSMUST00000186780.1	136735	ENSMUSG00000051185	Fam174a	family with sequence similarity 174, member A
chr1	88226263	88228999	2737	*	1021	-0.88296	8.48584	3.84588e-17	merged_common	263.994	486.845	Promoter	1	88226986	88233461	6476	1	100040766	ENSMUST00000148474.1	0	ENSMUSG00000079429	Mroh2a	maestro heat-like repeat family member 2A
chr10	111102909	111103885	977	*	442	0.87296	8.51462	3.92489e-17	merged_common	494.937	270.248	Distal Intergenic	10	111164752	111297249	132498	1	237542	ENSMUST00000105275.8	-60867	ENSMUSG00000020189	Osbpl8	oxysterol binding protein-like 8
chr11	80532880	80533510	631	*	287	3.09634	4.89068	3.96843e-17	ATAC_PL_unique	86.7535	10.1437	Intron (ENSMUST00000041065.13/338367, intron 21 of 21)	11	80507410	80509106	1697	2	77417	ENSMUST00000133400.1	-23774	ENSMUSG00000085078	C030013C21Rik	RIKEN cDNA C030013C21 gene
chr10	44631414	44632276	863	*	330	-1.44692	7.07105	3.98174e-17	merged_common	81.4357	222.014	Intron (ENSMUST00000217008.1/ENSMUST00000217008.1, intron 2 of 3)	10	44446717	44528501	81785	2	12142	ENSMUST00000167340.1	-102913	ENSMUSG00000038151	Prdm1	PR domain containing 1, with ZNF domain
chr2	167982137	167984013	1877	*	1050	2.60726	5.40085	4.15581e-17	ATAC_PL_unique	104.292	17.1154	Exon (ENSMUST00000123782.7/69553, exon 18 of 22)	2	167985058	167986755	1698	2	69553	ENSMUST00000131572.1	2742	ENSMUSG00000074577	Ripor3	RIPOR family member 3
chr9	28568667	28570159	1493	*	727	-0.96829	8.22069	4.16056e-17	merged_common	213.271	417.269	Intron (ENSMUST00000115243.8/330908, intron 2 of 7)	9	28661629	28675240	13612	1	330908	ENSMUST00000126845.1	-91470	ENSMUSG00000062257	Opcml	opioid binding protein/cell adhesion molecule-like
chr12	86893925	86895330	1406	*	624	1.13248	7.78286	4.18092e-17	merged_common	326.084	148.737	Distal Intergenic	12	86880701	86884798	4098	2	238330	ENSMUST00000038422.7	-9127	ENSMUSG00000034168	Irf2bpl	interferon regulatory factor 2 binding protein-like
chr10	125747901	125749701	1801	*	1278	-0.63486	9.42084	4.26949e-17	merged_common	550.047	854.105	Distal Intergenic	10	125966219	125998013	31795	1	320398	ENSMUST00000217813.1	-216518	ENSMUSG00000020105	Lrig3	leucine-rich repeats and immunoglobulin-like domains 3
chr13	92923105	92924789	1685	*	571	-0.84989	8.58603	4.37687e-17	merged_common	286.241	515.91	Distal Intergenic	13	92845198	92847681	2484	1	382793	ENSMUST00000224368.1	77907	ENSMUSG00000021704	Mtx3	metaxin 3
chr19	55840556	55841210	655	*	393	1.94044	6.24743	4.42199e-17	merged_common	148.843	38.7792	Intron (ENSMUST00000061496.15/21416, intron 4 of 12)	19	55893352	55919618	26267	1	21416	ENSMUST00000145249.7	-52142	ENSMUSG00000024985	Tcf7l2	transcription factor 7 like 2, T cell specific, HMG box
chr17	28517439	28518706	1268	*	777	1.46536	7.04737	4.59597e-17	merged_common	219.8	79.5996	Promoter	17	28399097	28517524	118428	2	14229	ENSMUST00000114792.7	0	ENSMUSG00000024222	Fkbp5	FK506 binding protein 5
chr8	84981752	84983077	1326	*	558	0.92237	8.35662	4.65451e-17	merged_common	451.257	238.102	Distal Intergenic	8	84976910	84978718	1809	2	16477	ENSMUST00000064922.6	-3034	ENSMUSG00000052837	Junb	jun B proto-oncogene
chr14	63132927	63133018	92	*	62	2.55435	5.4557	4.82486e-17	ATAC_PL_unique	106.365	18.1076	Intron (ENSMUST00000006235.8/13030, intron 1 of 9)	14	63135518	63141863	6346	1	13030	ENSMUST00000225540.1	-2500	ENSMUSG00000021939	Ctsb	cathepsin B
chr1	95596723	95597478	756	*	312	-1.66366	6.68214	4.87285e-17	merged_common	57.6924	182.781	Intron (ENSMUST00000043336.10/20452, intron 4 of 4)	1	95618551	95667535	48985	2	20452	ENSMUST00000189556.1	70057	ENSMUSG00000040710	St8sia4	ST8 alpha-N-acetyl-neuraminide alpha-2,8-sialyltransferase 4
chr2	60903419	60903990	572	*	263	1.97441	6.18969	4.87317e-17	merged_common	144.697	36.8217	Intron (ENSMUST00000028347.12/56878, intron 1 of 13)	2	60842297	60889030	46734	2	56878	ENSMUST00000132529.7	-14389	ENSMUSG00000026970	Rbms1	RNA binding motif, single stranded interacting protein 1
chr18	61130829	61134195	3367	*	1391	-1.10423	7.83233	5.28273e-17	merged_common	155.44	334.172	3' UTR	18	61117468	61117531	64	1	102466212	ENSMUST00000183458.1	13361	ENSMUSG00000098389	Mir6983	microRNA 6983
chr17	35865439	35867480	2042	*	562	1.2661	7.44494	5.30115e-17	merged_common	270.22	112.353	Promoter	17	35865593	35875591	9999	1	76448	ENSMUST00000127442.7	0	ENSMUSG00000034595	Ppp1r18	protein phosphatase 1, regulatory subunit 18
chrX	51465466	51467153	1688	*	460	-1.36648	7.23596	5.37939e-17	merged_common	93.8783	242.056	Intron (ENSMUST00000088172.11/50786, intron 3 of 4)	20	51679992	51680565	574	2	50786	ENSMUST00000142983.1	213412	ENSMUSG00000062184	Hs6st2	heparan sulfate 6-O-sulfotransferase 2
chr4	133107756	133108250	495	*	287	2.06255	6.07121	5.57031e-17	merged_common	137.424	32.8982	Distal Intergenic	4	133130505	133199756	69252	1	242687	ENSMUST00000084241.11	-22255	ENSMUSG00000028868	Wasf2	WAS protein family, member 2
chr13	52985416	52986574	1159	*	272	2.99486	4.97564	5.58631e-17	ATAC_PL_unique	88.8358	11.1441	Distal Intergenic	13	52967209	52981073	13865	2	18030	ENSMUST00000071065.7	-4343	ENSMUSG00000056749	Nfil3	nuclear factor, interleukin 3, regulated
chr17	6816212	6816688	477	*	181	2.99486	4.97564	5.58631e-17	ATAC_PL_unique	88.8358	11.1441	Intron (ENSMUST00000231816.1/ENSMUST00000231816.1, intron 1 of 1)	17	6738041	6782784	44744	2	22350	ENSMUST00000064234.6	-33428	ENSMUSG00000052397	Ezr	ezrin
chr8	8991997	8993064	1068	*	705	-1.13003	7.76528	5.8797e-17	merged_common	147.06	321.861	Distal Intergenic	8	9125412	9132288	6877	2	71249	ENSMUST00000208031.1	139224	ENSMUSG00000108848	4933430N04Rik	RIKEN cDNA 4933430N04 gene
chr7	100946265	100947321	1057	*	423	2.65016	5.33621	6.05759e-17	ATAC_PL_unique	101.216	16.1239	Intron (ENSMUST00000060174.5/233571, intron 1 of 2)	7	100869752	100932107	62356	2	207212	ENSMUST00000107032.2	-14158	ENSMUSG00000032875	Arhgef17	Rho guanine nucleotide exchange factor (GEF) 17
chr4	33098424	33099753	1330	*	955	-0.96115	8.22419	6.13391e-17	merged_common	214.319	417.249	Distal Intergenic	4	33081505	33085820	4316	1	14409	ENSMUST00000147889.1	16919	ENSMUSG00000023267	Gabrr2	gamma-aminobutyric acid (GABA) C receptor, subunit rho 2
chr17	34602940	34605073	2134	*	947	0.57727	9.67334	6.14888e-17	merged_common	997.363	668.464	Promoter	17	34601091	34603690	2600	2	54197	ENSMUST00000015622.7	0	ENSMUSG00000015478	Rnf5	ring finger protein 5
chr2	32882132	32883093	962	*	688	1.89939	6.29798	6.22042e-17	merged_common	151.973	40.7375	Intron (ENSMUST00000028135.14/227737, intron 1 of 13)	2	32876114	32925254	49141	1	227737	ENSMUST00000028135.14	6018	ENSMUSG00000026796	Fam129b	family with sequence similarity 129, member B
chr3	90247570	90249196	1627	*	540	1.10579	7.82414	6.26922e-17	merged_common	332.46	154.477	Promoter	3	90248172	90253612	5441	1	30791	ENSMUST00000015467.8	0	ENSMUSG00000052310	Slc39a1	solute carrier family 39 (zinc transporter), member 1
chr8	73313442	73314738	1297	*	660	-1.15827	7.69485	6.36027e-17	merged_common	138.69	309.541	Intron (ENSMUST00000004497.10/16795, intron 1 of 14)	8	72814599	73352556	537958	2	16795	ENSMUST00000004497.10	37818	ENSMUSG00000004383	Large1	LARGE xylosyl- and glucuronyltransferase 1
chr3	127018989	127020990	2002	*	1438	-1.15827	7.69485	6.36027e-17	merged_common	138.69	309.541	Intron (ENSMUST00000182078.8/109676, intron 15 of 45)	3	127015303	127024248	8946	2	109676	ENSMUST00000183097.1	3258	ENSMUSG00000032826	Ank2	ankyrin 2, brain
chr3	157634149	157635128	980	*	465	-1.79208	6.43171	6.74626e-17	merged_common	46.3877	160.647	Intron (ENSMUST00000041175.12/19218, intron 2 of 2)	3	157566900	157644756	77857	1	19218	ENSMUST00000173533.1	67249	ENSMUSG00000040016	Ptger3	prostaglandin E receptor 3 (subtype EP3)
chr1	150164601	150165289	689	*	501	1.41144	7.12192	6.92089e-17	merged_common	227.172	85.4021	Promoter	1	150159043	150164948	5906	2	102639566	ENSMUST00000181308.1	0	ENSMUSG00000097754	Ptgs2os2	prostaglandin-endoperoxide synthase 2, opposite strand 2
chr1	34564349	34564933	585	*	198	1.93045	6.24254	7.00933e-17	merged_common	147.827	38.782	Distal Intergenic	1	34543968	34560943	16976	2	21756	ENSMUST00000115071.3	-3406	ENSMUSG00000037529	Prss40	protease, serine 40
chr18	54970626	54971723	1098	*	366	1.08139	7.88154	7.47389e-17	merged_common	343.04	162.112	Intron (ENSMUST00000064763.5/269023, intron 2 of 9)	18	54888045	54990180	102136	2	269023	ENSMUST00000064763.5	18457	ENSMUSG00000052713	Zfp608	zinc finger protein 608
chr4	149846540	149847293	754	*	272	1.96415	6.18466	7.76494e-17	merged_common	143.682	36.8243	Distal Intergenic	4	149898214	149907289	9076	2	74646	ENSMUST00000105684.1	59996	ENSMUSG00000039911	Spsb1	splA/ryanodine receptor domain and SOCS box containing 1
chr13	28857668	28858369	702	*	508	-1.1847	7.61831	7.87736e-17	merged_common	130.324	296.248	Intron (ENSMUST00000148885.7/72518, intron 2 of 7)	13	28561484	28883456	321973	2	72518	ENSMUST00000125358.7	25087	NA	2610307P16Rik	RIKEN cDNA 2610307P16 gene
chr17	62862246	62863142	897	*	546	-1.66665	6.65757	8.28569e-17	merged_common	56.6595	179.881	Intron (ENSMUST00000076840.11/13640, intron 1 of 4)	17	62607319	62881144	273826	2	13640	ENSMUST00000078839.4	18002	ENSMUSG00000048915	Efna5	ephrin A5
chr17	7315756	7316384	629	*	286	1.86112	6.34653	8.52377e-17	merged_common	155.104	42.6942	Exon (ENSMUST00000231254.1/ENSMUST00000231254.1, exon 1 of 1)	17	7324646	7345974	21329	1	21461	ENSMUST00000095726.10	-8262	ENSMUSG00000071322	Tcp10a	t-complex protein 10a
chr1	52959706	52960831	1126	*	647	-1.3806	7.19431	8.53187e-17	merged_common	90.7616	236.322	Intron (ENSMUST00000114493.1/67080, intron 1 of 1)	1	52922324	52963260	40937	2	67080	ENSMUST00000114493.1	2429	ENSMUSG00000043629	1700019D03Rik	RIKEN cDNA 1700019D03 gene
chr3	10258305	10258873	569	*	178	2.2594	5.77537	8.69491e-17	ATAC_PL_unique	119.849	25.0314	Intron (ENSMUST00000029043.12/75497, intron 2 of 5)	3	10245918	10254252	8335	2	75497	ENSMUST00000117917.7	-4053	ENSMUSG00000027530	Fabp12	fatty acid binding protein 12
chr5	123427576	123427985	410	*	132	2.2594	5.77537	8.69491e-17	merged_common	119.849	25.0314	Intron (ENSMUST00000111596.7/208104, intron 1 of 8)	5	123446039	123457929	11891	1	208104	ENSMUST00000135961.1	-18054	ENSMUSG00000038342	Mlxip	MLX interacting protein
chr10	111159484	111160554	1071	*	478	-0.95405	8.22766	9.01542e-17	merged_common	215.364	417.226	Distal Intergenic	10	111164752	111297249	132498	1	237542	ENSMUST00000105275.8	-4198	ENSMUSG00000020189	Osbpl8	oxysterol binding protein-like 8
chr1	36321685	36326480	4796	*	2493	2.19903	5.85454	9.2143e-17	merged_common	123.988	27.0026	3' UTR	1	36317027	36318132	1106	1	214855	ENSMUST00000141121.1	4658	ENSMUSG00000037447	Arid5a	AT rich interactive domain 5A (MRF1-like)
chr19	34290058	34291184	1127	*	590	1.38977	7.1592	9.31302e-17	merged_common	231.374	88.2984	Promoter	19	34290659	34309350	18692	1	14102	ENSMUST00000112472.2	0	ENSMUSG00000024778	Fas	Fas (TNF receptor superfamily member 6)
chr14	73178882	73178964	83	*	40	-2.08433	5.9993	9.32192e-17	ATAC_PP_unique	31.0632	131.732	Intron (ENSMUST00000164822.7/105670, intron 14 of 14)	14	73174451	73182682	8232	1	105670	ENSMUST00000170278.1	4431	ENSMUSG00000022106	Rcbtb2	regulator of chromosome condensation (RCC1) and BTB (POZ) domain containing protein 2
chr13	101796315	101797709	1395	*	863	0.81163	8.69877	9.3739e-17	merged_common	550.495	313.638	Distal Intergenic	13	101680563	101768217	87655	2	18708	ENSMUST00000055518.12	-28098	ENSMUSG00000041417	Pik3r1	phosphoinositide-3-kinase regulatory subunit 1
chr3	87512307	87512946	640	*	410	2.11987	5.96463	9.40316e-17	merged_common	130.198	29.9544	Distal Intergenic	3	87525407	87540156	14750	1	27049	ENSMUST00000119109.7	-12461	ENSMUSG00000003382	Etv3	ets variant 3
chr16	93141857	93142447	591	*	375	2.11987	5.96463	9.40316e-17	merged_common	130.198	29.9544	Distal Intergenic	16	93343724	93353189	9466	2	69857	ENSMUST00000185971.6	210742	ENSMUSG00000100277	1810053B23Rik	RIKEN cDNA 1810053B23 gene
chrX	50971978	50972704	727	*	395	1.8896	6.29319	9.79797e-17	merged_common	150.957	40.7405	Distal Intergenic	20	50895180	50942710	47531	2	385354	ENSMUST00000164311.6	-29268	ENSMUSG00000036131	Frmd7	FERM domain containing 7
chr15	3232283	3234850	2568	*	2092	-0.94032	8.27627	1.00411e-16	merged_common	223.807	429.475	Distal Intergenic	15	3268547	3277273	8727	1	20363	ENSMUST00000160787.8	-33697	ENSMUSG00000064373	Selenop	selenoprotein P
chr6	110041132	110042057	926	*	484	-1.41746	7.11026	1.00708e-16	merged_common	84.5381	225.814	Distal Intergenic	6	110645581	111497090	851510	1	108073	ENSMUST00000174018.7	-603524	ENSMUSG00000056755	Grm7	glutamate receptor, metabotropic 7
chr6	22358002	22359618	1617	*	1242	-1.03527	7.98044	1.01605e-16	merged_common	176.412	361.556	Distal Intergenic	6	22307882	22356243	48362	2	27999	ENSMUST00000081288.13	-1759	ENSMUSG00000029672	Fam3c	family with sequence similarity 3, member C
chr15	100686923	100687727	805	*	321	1.668	6.62515	1.03348e-16	merged_common	175.966	55.3745	Promoter	15	100684906	100687915	3010	2	109901	ENSMUST00000230642.1	188	ENSMUSG00000023031	Cela1	chymotrypsin-like elastase family, member 1
chr12	106658083	106659380	1298	*	330	-1.15584	7.68265	1.04067e-16	merged_common	137.638	306.676	Distal Intergenic	12	106695716	106716324	20609	2	71033	ENSMUST00000124363.7	56944	ENSMUSG00000085820	4933406K04Rik	RIKEN cDNA 4933406K04 gene
chr1	45915957	45916886	930	*	428	-1.60139	6.7503	1.05314e-16	merged_common	61.803	187.532	Exon (ENSMUST00000191247.6/53945, exon 5 of 5)	1	45918928	45923309	4382	2	53945	ENSMUST00000188252.6	6423	ENSMUSG00000025993	Slc40a1	solute carrier family 40 (iron-regulated transporter), member 1
chr15	50102576	50104186	1611	*	967	-1.64831	6.67429	1.12237e-16	merged_common	57.6854	180.824	Distal Intergenic	15	50819499	50827521	8023	2	83925	ENSMUST00000183421.1	723335	ENSMUSG00000038679	Trps1	transcriptional repressor GATA binding 1
chr15	101266558	101267289	732	*	177	1.82534	6.39324	1.14041e-16	merged_common	158.233	44.6494	Promoter	15	101266846	101270124	3279	1	15370	ENSMUST00000230814.1	0	ENSMUSG00000023034	Nr4a1	nuclear receptor subfamily 4, group A, member 1
chr6	52471172	52472120	949	*	390	1.67641	6.60381	1.15115e-16	merged_common	173.888	54.4027	Distal Intergenic	6	52492451	52500086	7636	1	74304	ENSMUST00000203771.1	-20331	ENSMUSG00000107895	1700094M24Rik	RIKEN cDNA 1700094M24 gene
chr7	31125165	31128171	3007	*	1919	1.09663	7.81966	1.16913e-16	merged_common	330.378	154.487	Promoter	7	31116524	31126844	10321	2	20266	ENSMUST00000211945.1	0	ENSMUSG00000019194	Scn1b	sodium channel, voltage-gated, type I, beta
chr13	101547909	101548266	358	*	205	3.44104	4.55557	1.17081e-16	ATAC_PL_unique	77.4981	7.13568	Exon (ENSMUST00000224257.1/ENSMUST00000224257.1, exon 2 of 2)	13	101690135	101692343	2209	2	18708	ENSMUST00000190171.1	144077	ENSMUSG00000041417	Pik3r1	phosphoinositide-3-kinase regulatory subunit 1
chr2	117961786	117963375	1590	*	949	-0.9143	8.32969	1.2075e-16	merged_common	234.353	441.675	Intron (ENSMUST00000148587.7/329496, intron 8 of 9)	2	117821928	117909136	87209	1	73938	ENSMUST00000149239.1	139858	ENSMUSG00000086221	4930412B13Rik	RIKEN cDNA 4930412B13 gene
chr13	75752302	75753079	778	*	388	-1.26444	7.40646	1.22195e-16	merged_common	109.458	262.956	Intron (ENSMUST00000001583.7/192657, intron 4 of 11)	13	75755236	75770580	15345	1	192657	ENSMUST00000222564.1	-2157	ENSMUSG00000001542	Ell2	elongation factor RNA polymerase II 2
chr5	30887295	30889444	2150	*	830	1.16237	7.64145	1.26946e-16	merged_common	298.717	133.46	Promoter	5	30888694	30891207	2514	1	231093	ENSMUST00000200695.3	0	ENSMUSG00000029165	Agbl5	ATP/GTP binding protein-like 5
chr3	55816757	55817569	813	*	338	-1.16417	7.64223	1.26946e-16	merged_common	133.449	299.065	Intron (ENSMUST00000029374.7/26422, intron 39 of 57)	3	55778722	55787945	9224	2	26422	ENSMUST00000199126.1	-28812	ENSMUSG00000027799	Nbea	neurobeachin
chr6	17652071	17652581	511	*	283	1.68509	6.58214	1.27979e-16	merged_common	171.812	53.4306	Intron (ENSMUST00000148694.7/12343, intron 4 of 5)	6	17660606	17665686	5081	1	12343	ENSMUST00000142592.1	-8025	ENSMUSG00000015733	Capza2	capping protein (actin filament) muscle Z-line, alpha 2
chr15	30609972	30612117	2146	*	816	-0.53339	9.8734	1.2816e-16	merged_common	779.662	1128.43	Intron (ENSMUST00000081728.6/18163, intron 3 of 22)	15	30646532	30671124	24593	1	18163	ENSMUST00000228753.1	-34415	ENSMUSG00000022240	Ctnnd2	catenin (cadherin associated protein), delta 2
chr19	41980456	41982406	1951	*	975	0.6859	9.16169	1.28995e-16	merged_common	726.41	451.549	Promoter	19	41981763	42034641	52879	1	226122	ENSMUST00000026170.1	0	ENSMUSG00000025171	Ubtd1	ubiquitin domain containing 1
chr17	29490064	29492193	2130	*	503	0.94782	8.231	1.32101e-16	merged_common	417.291	216.33	Promoter	17	29490753	29496112	5360	1	18712	ENSMUST00000024811.8	0	ENSMUSG00000024014	Pim1	proviral integration site 1
chr6	82752675	82753954	1280	*	828	1.41088	7.08879	1.35611e-16	merged_common	221.971	83.4795	Intron (ENSMUST00000000642.10/15277, intron 2 of 17)	6	82760117	82772988	12872	2	15277	ENSMUST00000169270.1	19034	ENSMUSG00000000628	Hk2	hexokinase 2
chr8	35419840	35420408	569	*	379	2.27974	5.72766	1.38223e-16	ATAC_PL_unique	116.77	24.0471	Distal Intergenic	8	35376660	35379526	2867	1	244416	ENSMUST00000211472.1	43180	ENSMUSG00000046794	Ppp1r3b	protein phosphatase 1, regulatory subunit 3B
chr1	23379538	23384126	4589	*	3917	-0.48195	10.1538	1.39492e-16	merged_common	963.957	1346.29	Promoter	1	23366424	23383175	16752	2	70155	ENSMUST00000027343.5	0	ENSMUSG00000026158	Ogfrl1	opioid growth factor receptor-like 1
chr6	129001416	129002042	627	*	191	-1.72464	6.54935	1.42002e-16	merged_common	51.5189	170.269	Exon (ENSMUST00000122939.2/408064, exon 2 of 7)	6	128993040	129007961	14922	1	408064	ENSMUST00000122939.2	8376	NA	BC064078	cDNA sequence BC064078
chr17	26534473	26534564	92	*	51	2.04089	6.0606	1.44498e-16	ATAC_PL_unique	135.396	32.9032	Distal Intergenic	17	26505590	26508519	2930	2	19252	ENSMUST00000025025.6	-25954	ENSMUSG00000024190	Dusp1	dual specificity phosphatase 1
chr7	64011236	64012470	1235	*	725	0.71972	9.01073	1.45818e-16	merged_common	661.955	401.949	Exon (ENSMUST00000206557.1/ENSMUST00000206557.1, exon 2 of 4)	7	63886351	63938915	52565	2	50794	ENSMUST00000063694.9	-72321	ENSMUSG00000052040	Klf13	Kruppel-like factor 13
chr17	28180630	28181252	623	*	357	2.06235	6.02764	1.48174e-16	merged_common	133.326	31.9217	Exon (ENSMUST00000233458.1/ENSMUST00000233458.1, exon 1 of 1)	17	28177458	28205884	28427	1	224656	ENSMUST00000233904.1	3172	ENSMUSG00000024220	Zfp523	zinc finger protein 523
chr4	47302625	47304026	1402	*	847	-1.08895	7.84392	1.48629e-16	merged_common	157.526	335.088	Promoter	4	47303722	47313162	9441	1	12819	ENSMUST00000107730.2	0	ENSMUSG00000028339	Col15a1	collagen, type XV, alpha 1
chr6	81438913	81439829	917	*	228	-1.76039	6.44722	1.49279e-16	merged_common	47.4069	160.61	Distal Intergenic	6	81895590	81895663	74	2	102465711	ENSMUST00000197929.1	455834	ENSMUSG00000106154	Mir7232	microRNA 7232
chr1	149891028	149891684	657	*	220	1.79183	6.43826	1.49279e-16	merged_common	161.364	46.6028	Intron (ENSMUST00000070200.14/18783, intron 5 of 17)	1	149886184	149902199	16016	2	18783	ENSMUST00000155438.1	10515	ENSMUSG00000056220	Pla2g4a	phospholipase A2, group IVA (cytosolic, calcium-dependent)
chr7	16879989	16881141	1153	*	332	-1.76039	6.44722	1.49279e-16	merged_common	47.4069	160.61	Intron (ENSMUST00000108493.2/629378, intron 1 of 3)	7	16875317	16887462	12146	1	629378	ENSMUST00000108493.2	4672	ENSMUSG00000078794	Dact3	dishevelled-binding antagonist of beta-catenin 3
chr12	71040165	71040918	754	*	383	-1.63038	6.69077	1.51141e-16	merged_common	58.7119	181.769	Intron (ENSMUST00000046305.11/238247, intron 8 of 23)	12	71048341	71075405	27065	1	238247	ENSMUST00000135709.1	-7423	ENSMUSG00000048118	Arid4a	AT rich interactive domain 4A (RBP1-like)
chr3	142321811	142322342	532	*	327	-2.18815	5.8487	1.51334e-16	merged_common	26.9951	123.022	Intron (ENSMUST00000029941.15/56376, intron 3 of 12)	3	142249427	142304442	55016	2	56376	ENSMUST00000197808.4	-17369	ENSMUSG00000028273	Pdlim5	PDZ and LIM domain 5
chr12	103342888	103344256	1369	*	715	-0.70265	9.07045	1.51932e-16	merged_common	421.423	685.862	Intron (ENSMUST00000160463.1/ENSMUST00000160463.1, intron 1 of 3)	12	103321146	103338373	17228	2	65256	ENSMUST00000149431.1	-4515	ENSMUSG00000021200	Asb2	ankyrin repeat and SOCS box-containing 2
chr2	160699983	160700706	724	*	453	2.13335	5.92333	1.53527e-16	merged_common	127.116	28.9734	Intron (ENSMUST00000109468.2/21969, intron 9 of 20)	2	160702143	160703679	1537	1	21969	ENSMUST00000164510.1	-1437	ENSMUSG00000070544	Top1	topoisomerase (DNA) I
chr16	93913890	93914581	692	*	514	1.87974	6.28836	1.54114e-16	merged_common	149.939	40.7433	Distal Intergenic	16	93904693	93906110	1418	1	110749	ENSMUST00000128316.1	9197	ENSMUSG00000022945	Chaf1b	chromatin assembly factor 1, subunit B (p60)
chr15	62105974	62107276	1303	*	759	-1.03046	7.98658	1.54704e-16	merged_common	177.46	362.493	Exon (ENSMUST00000182956.7/19296, exon 2 of 7)	15	62099029	62107672	8644	1	19296	ENSMUST00000183028.1	6945	ENSMUSG00000097039	Pvt1	Pvt1 oncogene
chr6	142831163	142832231	1069	*	290	-1.30345	7.31186	1.55171e-16	merged_common	101.135	249.619	Exon (ENSMUST00000100821.2/665037, exon 6 of 7)	6	142814385	142816955	2571	1	665037	ENSMUST00000159599.1	16778	ENSMUSG00000072683	Gm7457	predicted gene 7457
chr18	35854264	35854918	655	*	308	1.70331	6.53774	1.57238e-16	merged_common	167.66	51.4852	Intron (ENSMUST00000060722.6/67393, intron 1 of 2)	18	35829818	35861687	31870	1	67393	ENSMUST00000060722.6	24446	ENSMUSG00000046668	Cxxc5	CXXC finger 5
chr4	95214988	95216587	1600	*	1298	-1.68089	6.61125	1.57483e-16	merged_common	54.5991	175.059	Distal Intergenic	4	95049034	95052222	3189	2	16476	ENSMUST00000107094.1	-162766	ENSMUSG00000052684	Jun	jun proto-oncogene
chr14	122261109	122262048	940	*	376	-1.59394	6.74649	1.58392e-16	merged_common	61.7994	186.555	Intron (ENSMUST00000026625.6/69634, intron 1 of 7)	14	122258041	122402227	144187	1	69634	ENSMUST00000226136.1	3068	ENSMUSG00000025545	Clybl	citrate lyase beta like
chr11	103052939	103054032	1094	*	505	1.592	6.75433	1.58392e-16	merged_common	187.446	62.1779	Intron (ENSMUST00000181125.1/ENSMUST00000181125.1, intron 1 of 1)	11	103070585	103071750	1166	2	72469	ENSMUST00000124740.1	17718	ENSMUSG00000020937	Plcd3	phospholipase C, delta 3
chr1	177643884	177644562	679	*	472	2.478	5.4947	1.58712e-16	ATAC_PL_unique	106.425	19.1026	Promoter	1	177641542	177642943	1402	2	75589	ENSMUST00000189507.1	-941	ENSMUSG00000101746	2310043L19Rik	RIKEN cDNA 2310043L19 gene
chr1	91251008	91251771	764	*	575	1.34338	7.22766	1.60227e-16	merged_common	238.749	94.09	Promoter	1	91250656	91265237	14582	1	67921	ENSMUST00000191533.1	352	ENSMUSG00000034343	Ube2f	ubiquitin-conjugating enzyme E2F (putative)
chr11	87754649	87757505	2857	*	856	1.1369	7.70916	1.63477e-16	merged_common	310.319	141.113	Promoter	11	87756841	87756955	115	2	102466883	ENSMUST00000083486.2	0	ENSMUSG00000065420	Mir142b	microRNA 142b
chr10	99681619	99682585	967	*	507	-1.43979	7.03009	1.67111e-16	merged_common	79.352	215.267	Distal Intergenic	10	99638731	99641920	3190	2	100417125	ENSMUST00000218988.1	-39699	ENSMUSG00000112503	Gm18409	mediator of cell motility 1 pseudogene
chr3	95457576	95458117	542	*	436	1.91027	6.23266	1.75372e-16	merged_common	145.795	38.7876	Intron (ENSMUST00000147765.7/11863, intron 3 of 18)	3	95466288	95495567	29280	1	11863	ENSMUST00000156653.7	-8171	ENSMUSG00000015522	Arnt	aryl hydrocarbon receptor nuclear translocator
chr2	119237074	119238178	1105	*	588	1.47417	6.98014	1.75488e-16	merged_common	210.434	75.7438	Promoter	2	119237362	119249514	12153	1	20732	ENSMUST00000028783.13	0	ENSMUSG00000027315	Spint1	serine protease inhibitor, Kunitz type 1
chr15	9070340	9072569	2230	*	859	-0.52295	9.91349	1.75988e-16	merged_common	804.537	1156.03	Promoter	15	9071260	9110487	39228	1	68646	ENSMUST00000067760.10	0	ENSMUSG00000022253	Nadk2	NAD kinase 2, mitochondrial
chr8	10705683	10706777	1095	*	499	-1.57599	6.78487	1.84782e-16	merged_common	63.8615	190.397	Distal Intergenic	8	10871509	10882435	10927	2	320014	ENSMUST00000208358.1	175658	ENSMUSG00000109473	B930025P03Rik	RIKEN cDNA B930025P03 gene
chr15	5445774	5447275	1502	*	811	1.10068	7.80375	1.89278e-16	merged_common	327.214	152.579	Distal Intergenic	15	5496266	5594984	98719	1	71432	ENSMUST00000211750.1	-48991	ENSMUSG00000110018	5430437J10Rik	RIKEN cDNA 5430437J10 gene
chr9	70840375	70843061	2687	*	2131	1.33503	7.23821	1.96577e-16	merged_common	239.806	95.0553	Intron (ENSMUST00000034731.9/15450, intron 1 of 8)	9	70776053	70778378	2326	1	11487	ENSMUST00000145377.1	64322	ENSMUSG00000054693	Adam10	a disintegrin and metallopeptidase domain 10
chr4	136123084	136123359	276	*	182	4.85306	3.4771	2.05023e-16	ATAC_PL_unique	59.8646	2.07135	Distal Intergenic	4	136143497	136145392	1896	1	15903	ENSMUST00000008016.2	-20138	ENSMUSG00000007872	Id3	inhibitor of DNA binding 3
chr15	83407168	83407963	796	*	451	1.84186	6.3371	2.08647e-16	merged_common	153.068	42.7002	Intron (ENSMUST00000171436.7/23970, intron 1 of 10)	15	83388550	83423790	35241	2	23970	ENSMUST00000230816.1	15827	ENSMUSG00000016664	Pacsin2	protein kinase C and casein kinase substrate in neurons 2
chr18	57595924	57597208	1285	*	604	-1.57744	6.76203	2.09792e-16	merged_common	62.8269	187.5	Intron (ENSMUST00000079738.9/75444, intron 5 of 6)	18	57563176	57731006	167831	1	75444	ENSMUST00000123872.1	32748	ENSMUSG00000058925	Ccdc192	coiled-coil domain containing 192
chr10	80929058	80930965	1908	*	921	1.02838	7.96932	2.18462e-16	merged_common	357.924	175.476	Promoter	10	80930073	80932204	2132	1	17873	ENSMUST00000015456.9	0	ENSMUSG00000015312	Gadd45b	growth arrest and DNA-damage-inducible 45 beta
chr7	67444052	67446653	2602	*	1575	-0.68876	9.11026	2.19942e-16	merged_common	435.304	701.666	Distal Intergenic	7	67251809	67372858	121050	2	17258	ENSMUST00000133074.1	-71194	ENSMUSG00000030557	Mef2a	myocyte enhancer factor 2A
chr3	131600620	131601452	833	*	379	-1.2979	7.30902	2.21042e-16	merged_common	101.13	248.65	Intron (ENSMUST00000029666.13/23971, intron 6 of 11)	3	131564935	131583200	18266	1	23971	ENSMUST00000196638.1	35685	ENSMUSG00000028032	Papss1	3'-phosphoadenosine 5'-phosphosulfate synthase 1
chr4	15269441	15270119	679	*	357	-1.45203	6.99806	2.23197e-16	merged_common	77.2812	211.436	Intron (ENSMUST00000062684.8/100201, intron 1 of 2)	4	15265831	15286753	20923	1	100201	ENSMUST00000062684.8	3610	ENSMUSG00000043252	Tmem64	transmembrane protein 64
chr13	63252868	63254487	1620	*	550	1.46305	6.99292	2.23197e-16	merged_common	211.49	76.7128	Exon (ENSMUST00000221520.1/ENSMUST00000221520.1, exon 1 of 1)	13	63240108	63301232	61125	1	72061	ENSMUST00000220884.1	12760	ENSMUSG00000021458	Aopep	aminopeptidase O
chr1	152167721	152168753	1033	*	690	-1.40975	7.07037	2.29106e-16	merged_common	82.4527	219.07	Distal Intergenic	1	151884524	152090125	205602	2	69399	ENSMUST00000044581.13	-77596	ENSMUSG00000032666	1700025G04Rik	RIKEN cDNA 1700025G04 gene
chr16	58711924	58712784	861	*	518	-1.34342	7.22419	2.29996e-16	merged_common	93.8627	238.179	Intron (ENSMUST00000232532.1/ENSMUST00000232532.1, intron 1 of 1)	16	58717433	58719070	1638	2	71223	ENSMUST00000089318.4	6286	ENSMUSG00000047293	Gpr15	G protein-coupled receptor 15
chr17	10326408	10327449	1042	*	361	-0.97123	8.14885	2.32718e-16	merged_common	202.705	397.405	Intron (ENSMUST00000187397.6/76634, intron 2 of 2)	17	10324602	10329307	4706	1	76634	ENSMUST00000188715.1	1806	ENSMUSG00000099384	1700110C19Rik	RIKEN cDNA 1700110C19 gene
chr2	148890029	148890786	758	*	617	-2.24294	5.76325	2.37861e-16	ATAC_PP_unique	24.9641	118.17	Exon (ENSMUST00000195146.1/ENSMUST00000195146.1, exon 1 of 1)	2	148872848	148875692	2845	2	13010	ENSMUST00000144845.1	-14337	ENSMUSG00000027447	Cst3	cystatin C
chr13	43774999	43775642	644	*	472	2.51245	5.43518	2.40113e-16	ATAC_PL_unique	103.351	18.113	Distal Intergenic	13	43784775	43803132	18358	1	12522	ENSMUST00000015540.3	-9133	ENSMUSG00000015396	Cd83	CD83 antigen
chr9	107981633	107984001	2369	*	1928	-1.04062	7.93943	2.40691e-16	merged_common	171.15	352.075	Promoter	9	107983025	107984053	1029	1	74153	ENSMUST00000177071.7	0	ENSMUSG00000032596	Uba7	ubiquitin-like modifier activating enzyme 7
chr10	22306146	22306839	694	*	405	1.6944	6.53338	2.41241e-16	merged_common	166.639	51.4886	Promoter	10	22306702	22312944	6243	1	606736	ENSMUST00000181223.7	0	ENSMUSG00000097352	C920009B18Rik	RIKEN cDNA C920009B18 gene
chr6	91693292	91693960	669	*	370	1.39436	7.09722	2.47005e-16	merged_common	221.998	84.4509	Intron (ENSMUST00000032185.8/21366, intron 1 of 14)	6	91701657	91724863	23207	1	21366	ENSMUST00000205828.1	-7697	ENSMUSG00000030096	Slc6a6	solute carrier family 6 (neurotransmitter transporter, taurine), member 6
chr14	69853758	69854608	851	*	370	2.1217	5.91763	2.49973e-16	merged_common	126.105	28.9759	Intron (ENSMUST00000022678.4/73523, intron 3 of 6)	14	69840420	70059918	219499	1	73523	ENSMUST00000022678.4	13338	ENSMUSG00000022085	Pebp4	phosphatidylethanolamine binding protein 4
chr10	111515797	111516988	1192	*	669	1.20368	7.52083	2.55725e-16	merged_common	278.719	121.011	Distal Intergenic	10	111507696	111508165	470	1	21664	ENSMUST00000186359.1	8101	ENSMUSG00000020205	Phlda1	pleckstrin homology like domain, family A, member 1
chr12	84218301	84219770	1470	*	1087	1.65918	6.59538	2.67809e-16	merged_common	171.846	54.4096	Promoter	12	84149176	84218881	69706	2	238317	ENSMUST00000046266.12	0	ENSMUSG00000042507	Elmsan1	ELM2 and Myb/SANT-like domain containing 1
chr16	44961802	44963587	1786	*	1250	-0.64658	9.27842	3.01011e-16	merged_common	496.321	776.967	Intron (ENSMUST00000114612.7/74603, intron 4 of 4)	16	44965254	44966854	1601	1	74603	ENSMUST00000163358.1	-1667	ENSMUSG00000036172	Cd200r3	CD200 receptor 3
chr12	108309330	108310037	708	*	245	2.79135	5.112	3.0157e-16	ATAC_PL_unique	90.9925	13.1439	Intron (ENSMUST00000021685.7/214305, intron 1 of 8)	12	108306548	108326608	20061	1	214305	ENSMUST00000223395.1	2782	ENSMUSG00000021260	Hhipl1	hedgehog interacting protein-like 1
chr2	167996092	167996789	698	*	528	1.93291	6.16937	3.11466e-16	merged_common	140.636	36.8327	Intron (ENSMUST00000123782.7/69553, intron 4 of 21)	2	167988802	167991347	2546	2	69553	ENSMUST00000142702.1	-4745	ENSMUSG00000074577	Ripor3	RIPOR family member 3
chr9	123936383	123936991	609	*	382	2.36395	5.58025	3.22029e-16	ATAC_PL_unique	108.551	21.0869	Distal Intergenic	9	123962124	123968692	6569	2	12768	ENSMUST00000026911.5	31701	ENSMUSG00000025804	Ccr1	chemokine (C-C motif) receptor 1
chr7	140941254	140942638	1385	*	561	1.10841	7.7431	3.37343e-16	merged_common	314.585	145.906	Promoter	7	140941391	140947656	6266	1	212974	ENSMUST00000164337.7	0	ENSMUSG00000062031	Pgghg	protein glucosylgalactosylhydroxylysine glucosidase
chr14	103776810	103778721	1912	*	819	-1.16819	7.59822	3.45772e-16	merged_common	129.259	290.484	Distal Intergenic	14	103814728	103843695	28968	2	13618	ENSMUST00000227824.1	64974	ENSMUSG00000022122	Ednrb	endothelin receptor type B
chr9	37254613	37256329	1717	*	830	-0.87042	8.42626	3.516e-16	merged_common	254.417	465.123	Promoter	9	37227585	37255738	28154	2	56857	ENSMUST00000115068.9	0	ENSMUSG00000032122	Slc37a2	solute carrier family 37 (glycerol-3-phosphate transporter), member 2
chr14	20478565	20479161	597	*	355	1.84572	6.30574	3.5226e-16	merged_common	149.977	41.7261	Promoter	14	20458792	20479908	21117	2	11750	ENSMUST00000224410.1	747	ENSMUSG00000021814	Anxa7	annexin A7
chr13	23716046	23716744	699	*	447	1.49603	6.89599	3.54708e-16	merged_common	200.021	70.9128	Distal Intergenic	13	23702034	23710854	8821	2	15216	ENSMUST00000091706.13	-5192	ENSMUSG00000006611	Hfe	homeostatic iron regulator
chr10	24159931	24161069	1139	*	594	-1.03177	7.94377	3.66634e-16	merged_common	172.193	352.055	Intron (ENSMUST00000020174.6/53331, intron 2 of 9)	10	24152447	24155314	2868	1	53331	ENSMUST00000219553.1	7484	ENSMUSG00000019998	Stx7	syntaxin 7
chr7	43530080	43531225	1146	*	574	1.3012	7.29266	3.6937e-16	merged_common	246.127	99.8756	Exon (ENSMUST00000205503.1/12489, exon 4 of 6)	7	43528526	43532678	4153	2	12489	ENSMUST00000206371.1	1453	ENSMUSG00000004609	Cd33	CD33 antigen
chr6	70830415	70831094	680	*	339	-2.02682	6.01671	3.84529e-16	merged_common	32.0733	130.7	Distal Intergenic	6	70844515	70905245	60731	1	13666	ENSMUST00000034093.14	-13421	ENSMUSG00000031668	Eif2ak3	eukaryotic translation initiation factor 2 alpha kinase 3
chr14	40924160	40925076	917	*	333	-1.0378	7.92909	3.85017e-16	merged_common	170.094	349.219	Intron (ENSMUST00000047652.5/52588, intron 2 of 8)	14	40915241	40934316	19076	2	52588	ENSMUST00000224349.1	9240	ENSMUSG00000037824	Tspan14	tetraspanin 14
chr4	136889930	136898228	8299	*	3149	0.89841	8.32763	3.86316e-16	merged_common	438.622	235.311	Promoter	4	136889804	136893065	3262	2	12262	ENSMUST00000046332.5	0	ENSMUSG00000036896	C1qc	complement component 1, q subcomponent, C chain
chr10	117392940	117393901	962	*	433	1.61115	6.67104	3.88426e-16	merged_common	178.109	58.3017	Intron (ENSMUST00000219525.1/ENSMUST00000219525.1, intron 1 of 1)	10	117366178	117380015	13838	2	432508	ENSMUST00000175924.1	-12925	ENSMUSG00000055531	Cpsf6	cleavage and polyadenylation specific factor 6
chr4	129081280	129082246	967	*	481	1.61115	6.67104	3.88426e-16	merged_common	178.109	58.3017	Intron (ENSMUST00000168461.7/75234, intron 7 of 8)	4	129078971	129085886	6916	1	75234	ENSMUST00000130803.2	2309	ENSMUSG00000028793	Rnf19b	ring finger protein 19B
chr3	8993063	8994115	1053	*	707	1.78489	6.40448	3.91707e-16	merged_common	157.251	45.6339	Promoter	3	8930892	8993890	62999	2	21985	ENSMUST00000121038.7	0	ENSMUSG00000027506	Tpd52	tumor protein D52
chr1	157553973	157555608	1636	*	425	-1.15236	7.62482	3.97785e-16	merged_common	132.389	294.271	Exon (ENSMUST00000086130.8/89867, exon 17 of 28)	1	157538051	157543963	5913	1	89867	ENSMUST00000155665.1	15922	ENSMUSG00000026589	Sec16b	SEC16 homolog B (S. cerevisiae)
chr15	27674459	27677092	2634	*	1366	-1.06443	7.86002	4.06884e-16	merged_common	160.653	335.981	Intron (ENSMUST00000226170.1/223433, intron 1 of 8)	15	27655071	27681512	26442	2	223433	ENSMUST00000226145.1	4420	ENSMUSG00000056069	Otulinl	OTU deubiquitinase with linear linkage specificity like
chr2	124575914	124576688	775	*	326	-1.86079	6.2608	4.07741e-16	merged_common	40.2357	146.139	Intron (ENSMUST00000103241.7/214968, intron 5 of 20)	2	124610106	124662885	52780	1	214968	ENSMUST00000132088.1	-33418	ENSMUSG00000027200	Sema6d	sema domain, transmembrane domain (TM), and cytoplasmic domain, (semaphorin) 6D
chr8	125105365	125105751	387	*	172	3.0278	4.85712	4.07907e-16	ATAC_PL_unique	82.7691	10.1487	Intron (ENSMUST00000074562.10/244667, intron 3 of 12)	8	125087987	125102878	14892	1	244667	ENSMUST00000126111.1	17378	ENSMUSG00000043051	Disc1	disrupted in schizophrenia 1
chr14	30256312	30256435	124	*	57	3.0278	4.85712	4.07907e-16	ATAC_PL_unique	82.7691	10.1487	Intron (ENSMUST00000112250.4/12289, intron 3 of 46)	14	30116324	30175391	59068	2	12289	ENSMUST00000224073.1	-80921	ENSMUSG00000015968	Cacna1d	calcium channel, voltage-dependent, L type, alpha 1D subunit
chr2	154659222	154660070	849	*	544	2.49821	5.42821	4.08788e-16	ATAC_PL_unique	102.346	18.1149	Intron (ENSMUST00000151668.7/75608, intron 1 of 4)	2	154657018	154694785	37768	1	75608	ENSMUST00000044277.9	2204	ENSMUSG00000038467	Chmp4b	charged multivesicular body protein 4B
chr11	100994428	100995332	905	*	351	2.85553	5.03035	4.14318e-16	ATAC_PL_unique	87.9197	12.1475	Distal Intergenic	11	101009452	101021410	11959	1	11975	ENSMUST00000151554.1	-14120	ENSMUSG00000019302	Atp6v0a1	ATPase, H+ transporting, lysosomal V0 subunit A1
chr15	10771082	10771908	827	*	453	1.40717	7.07026	4.16808e-16	merged_common	218.857	82.5202	Intron (ENSMUST00000180604.1/75259, intron 5 of 6)	15	10814792	10835214	20423	1	100502601	ENSMUST00000227059.1	-42884	NA	Gm19276	predicted gene, 19276
chr1	62414373	62415331	959	*	376	-1.31347	7.25619	4.19053e-16	merged_common	96.9692	241.006	Intron (ENSMUST00000075374.9/72823, intron 18 of 22)	1	62131195	62136109	4915	2	105243940	ENSMUST00000127498.2	-278264	NA	Pard3bos2	par-3 family cell polarity regulator beta, opposite strand 2
chr12	80580795	80581865	1071	*	711	-1.77117	6.38863	4.28341e-16	merged_common	45.3505	154.795	Exon (ENSMUST00000219993.1/108760, exon 8 of 16)	12	80592427	80598588	6162	1	108760	ENSMUST00000217926.1	-10562	ENSMUSG00000021130	Galnt16	polypeptide N-acetylgalactosaminyltransferase 16
chr16	11874913	11875884	972	*	449	-1.39268	7.09761	4.46063e-16	merged_common	84.5229	221.928	Intron (ENSMUST00000096272.10/223978, intron 2 of 3)	16	11901363	11930600	29238	1	791359	ENSMUST00000068397.5	-25479	ENSMUSG00000055015	Gm9961	predicted gene 9961
chr10	122894235	122895758	1524	*	464	0.96394	8.12054	4.63476e-16	merged_common	388.699	199.269	Promoter	10	122895368	122941449	46082	1	319468	ENSMUST00000162969.1	0	ENSMUSG00000034613	Ppm1h	protein phosphatase 1H (PP2C domain containing)
chr6	129014065	129014936	872	*	477	-1.53724	6.81114	4.72925e-16	merged_common	65.9143	191.309	Promoter	6	129014112	129020527	6416	1	435921	ENSMUST00000204981.1	0	ENSMUSG00000089728	Clec2f	C-type lectin domain family 2, member f
chr15	5415829	5416713	885	*	379	1.36608	7.13182	4.74546e-16	merged_common	225.168	87.3527	Distal Intergenic	15	5496266	5594984	98719	1	71432	ENSMUST00000211750.1	-79553	ENSMUSG00000110018	5430437J10Rik	RIKEN cDNA 5430437J10 gene
chr1	62608390	62609349	960	*	425	-1.39703	7.06388	4.84518e-16	merged_common	82.4453	217.127	Intron (ENSMUST00000075374.9/72823, intron 22 of 22)	1	62703285	62739932	36648	1	18187	ENSMUST00000126344.1	-93936	ENSMUSG00000025969	Nrp2	neuropilin 2
chr2	129319871	129320614	744	*	282	1.17439	7.57324	4.84921e-16	merged_common	286.112	126.768	Distal Intergenic	2	129299610	129309972	10363	2	16175	ENSMUST00000028882.1	-9899	ENSMUSG00000027399	Il1a	interleukin 1 alpha
chr18	50016409	50018189	1781	*	596	-1.31754	7.24266	4.91442e-16	merged_common	95.9287	239.093	Intron (ENSMUST00000148989.2/106869, intron 1 of 1)	18	50019567	50090794	71228	1	106869	ENSMUST00000126666.2	-1378	ENSMUSG00000062210	Tnfaip8	tumor necrosis factor, alpha-induced protein 8
chr13	59671660	59672722	1063	*	687	-0.98155	8.07693	5.01188e-16	merged_common	192.159	379.434	Intron (ENSMUST00000022039.6/105348, intron 1 of 9)	13	59645092	59675772	30681	2	105348	ENSMUST00000225333.1	3050	ENSMUSG00000021556	Golm1	golgi membrane protein 1
chr19	53801516	53802523	1008	*	512	-1.36034	7.15046	5.02016e-16	merged_common	88.6648	227.643	Intron (ENSMUST00000095969.9/73713, intron 1 of 8)	19	53793308	53813573	20266	1	73713	ENSMUST00000162910.1	8208	ENSMUSG00000043639	Rbm20	RNA binding motif protein 20
chr15	64040510	64041536	1027	*	394	1.66751	6.54712	5.07998e-16	merged_common	166.673	52.468	Intron (ENSMUST00000063838.10/223601, intron 1 of 11)	15	63944394	64060330	115937	2	223601	ENSMUST00000226675.1	18794	ENSMUSG00000022378	Fam49b	family with sequence similarity 49, member B
chr15	27936970	27938545	1576	*	952	-0.79794	8.65295	5.2829e-16	merged_common	305.278	530.762	Intron (ENSMUST00000090247.6/223435, intron 1 of 56)	15	27770536	27919271	148736	2	223435	ENSMUST00000227337.1	-17699	ENSMUSG00000022263	Trio	triple functional domain (PTPRF interacting)
chr13	34088193	34089712	1520	*	1027	-1.13901	7.64068	5.38587e-16	merged_common	134.473	296.15	Exon (ENSMUST00000222745.1/432745, exon 4 of 5)	13	34074274	34078007	3734	2	22151	ENSMUST00000056427.9	-10186	ENSMUSG00000058672	Tubb2a	tubulin, beta 2A class IIA
chr3	79841687	79845124	3438	*	2542	-0.73223	8.89814	5.56221e-16	merged_common	370.165	614.92	Promoter	3	79812564	79842679	30116	2	70652	ENSMUST00000029568.6	0	ENSMUSG00000027956	Tmem144	transmembrane protein 144
chr2	44956278	44956689	412	*	209	2.92788	4.94285	5.56548e-16	ATAC_PL_unique	84.8469	11.1495	Distal Intergenic	2	44635264	44927657	292394	2	227835	ENSMUST00000148279.7	-28621	ENSMUSG00000036890	Gtdc1	glycosyltransferase-like domain containing 1
chr1	13647542	13648716	1175	*	457	-0.79547	8.65671	5.69048e-16	merged_common	306.337	531.691	Intron (ENSMUST00000027071.6/212442, intron 2 of 6)	1	13629995	13638411	8417	2	212442	ENSMUST00000156222.1	-9131	ENSMUSG00000025937	Lactb2	lactamase, beta 2
chr13	43765061	43765826	766	*	383	1.25447	7.37645	5.71926e-16	merged_common	256.655	107.576	Distal Intergenic	13	43784775	43803132	18358	1	12522	ENSMUST00000015540.3	-18949	ENSMUSG00000015396	Cd83	CD83 antigen
chr4	88395429	88396477	1049	*	452	-1.24642	7.38342	5.71926e-16	merged_common	108.399	257.179	3' UTR	4	88400350	88407219	6870	1	230393	ENSMUST00000162039.1	-3873	ENSMUSG00000038368	Focad	focadhesin
chr8	116974110	116976232	2123	*	1081	-1.46443	6.9247	5.81249e-16	merged_common	73.1347	201.819	Intron (ENSMUST00000070577.6/69528, intron 1 of 2)	8	116969594	116978943	9350	2	69528	ENSMUST00000070577.6	2711	ENSMUSG00000031847	1700030J22Rik	RIKEN cDNA 1700030J22 gene
chr6	65822336	65823318	983	*	501	-1.83398	6.2835	5.94596e-16	merged_common	41.2554	147.083	Intron (ENSMUST00000031976.13/70779, intron 2 of 14)	6	65779101	65936134	157034	1	70779	ENSMUST00000172638.1	43235	ENSMUSG00000029913	Prdm5	PR domain containing 5
chr1	33563406	33564735	1330	*	456	-1.83398	6.2835	5.94596e-16	merged_common	41.2554	147.083	Intron (ENSMUST00000027312.10/19076, intron 7 of 13)	1	33478942	33622142	143201	2	19076	ENSMUST00000189552.1	57407	ENSMUSG00000026134	Prim2	DNA primase, p58 subunit
chr3	79088528	79089632	1105	*	761	-1.00876	8.00098	6.00082e-16	merged_common	180.593	363.386	Exon (ENSMUST00000118100.7/76089, exon 12 of 24)	3	79062516	79144977	82462	2	76089	ENSMUST00000118100.7	55345	ENSMUSG00000062232	Rapgef2	Rap guanine nucleotide exchange factor (GEF) 2
chr6	149194156	149194305	150	*	87	2.2755	5.66546	6.05057e-16	ATAC_PL_unique	111.679	23.0662	Distal Intergenic	6	149157147	149188712	31566	2	232566	ENSMUST00000111535.7	-5444	ENSMUSG00000068250	Amn1	antagonist of mitotic exit network 1
chr13	94294766	94295367	602	*	292	2.2755	5.66546	6.05057e-16	merged_common	111.679	23.0662	Exon (ENSMUST00000221222.1/ENSMUST00000221222.1, exon 1 of 4)	13	94203374	94285857	82484	2	107767	ENSMUST00000152555.7	-8909	ENSMUSG00000021687	Scamp1	secretory carrier membrane protein 1
chr9	120045293	120048967	3675	*	1419	-2.016	6.01118	6.18078e-16	merged_common	32.0706	129.713	3' UTR	9	119901616	120068283	166668	2	13051	ENSMUST00000177637.1	19316	ENSMUSG00000052336	Cx3cr1	chemokine (C-X3-C motif) receptor 1
chr17	48232547	48232867	321	*	88	3.23372	4.6427	6.21995e-16	ATAC_PL_unique	76.6153	8.14458	Promoter	17	48232768	48246362	13595	1	58217	ENSMUST00000113251.9	0	ENSMUSG00000042265	Trem1	triggering receptor expressed on myeloid cells 1
chr2	13413203	13414214	1012	*	538	1.13175	7.64693	6.25269e-16	merged_common	296.688	135.397	Intron (ENSMUST00000091436.6/65969, intron 27 of 66)	2	13422029	13455627	33599	2	65969	ENSMUST00000195447.1	41413	ENSMUSG00000026726	Cubn	cubilin (intrinsic factor-cobalamin receptor)
chr17	63062739	63063429	691	*	186	-1.69514	6.50509	6.28206e-16	merged_common	50.4758	163.445	Intron (ENSMUST00000024761.12/50758, intron 8 of 8)	17	62604184	62881317	277134	2	13640	ENSMUST00000076840.11	-181422	ENSMUSG00000048915	Efna5	ephrin A5
chr8	8954243	8955175	933	*	383	-2.25438	5.70893	6.28999e-16	ATAC_PP_unique	23.9464	114.256	Distal Intergenic	8	9125412	9132288	6877	2	71249	ENSMUST00000208031.1	177113	ENSMUSG00000108848	4933430N04Rik	RIKEN cDNA 4933430N04 gene
chr10	62507156	62508297	1142	*	641	1.28742	7.29969	6.34512e-16	merged_common	246.151	100.844	Promoter	10	62494428	62507755	13328	2	19073	ENSMUST00000020271.12	0	ENSMUSG00000020077	Srgn	serglycin
chr10	80074096	80075978	1883	*	1353	0.92426	8.23202	6.35175e-16	merged_common	414.19	218.258	Promoter	10	80071283	80075400	4118	2	216161	ENSMUST00000218310.1	0	ENSMUSG00000035673	Sbno2	strawberry notch 2
chr8	85515378	85515966	589	*	241	2.05073	5.9771	6.35851e-16	merged_common	128.219	30.9472	Promoter	8	85515977	85521494	5518	1	108682	ENSMUST00000140189.7	-11	ENSMUSG00000031700	Gpt2	glutamic pyruvate transaminase (alanine aminotransferase) 2
chr5	16552450	16554272	1823	*	636	1.05348	7.85086	6.53697e-16	merged_common	332.59	160.243	Promoter	5	16553495	16573434	19940	1	15234	ENSMUST00000195957.4	0	ENSMUSG00000028864	Hgf	hepatocyte growth factor
chr4	32351259	32353412	2154	*	523	1.26985	7.34492	6.63078e-16	merged_common	252.448	104.691	Intron (ENSMUST00000108180.8/12014, intron 2 of 6)	4	32417435	32586108	168674	1	12014	ENSMUST00000171600.1	-64023	ENSMUSG00000040270	Bach2	BTB and CNC homology, basic leucine zipper transcription factor 2
chr10	82962474	82963238	765	*	279	2.12372	5.86905	6.6479e-16	merged_common	122.015	27.9968	Distal Intergenic	10	82985498	83195900	210403	1	58250	ENSMUST00000040110.7	-22260	ENSMUSG00000034612	Chst11	carbohydrate sulfotransferase 11
chr19	34217691	34218142	452	*	339	-2.12304	5.86905	6.6479e-16	merged_common	28.0034	121.986	Promoter	19	34217624	34240331	22708	1	76630	ENSMUST00000119603.1	67	ENSMUSG00000024776	Stambpl1	STAM binding protein like 1
chr16	24891296	24892021	726	*	378	1.25558	7.36409	6.74103e-16	merged_common	254.563	106.617	Intron (ENSMUST00000038053.13/210126, intron 10 of 12)	16	24845175	24979450	134276	1	210126	ENSMUST00000232546.1	46121	ENSMUSG00000033306	Lpp	LIM domain containing preferred translocation partner in lipoma
chr11	87426346	87427412	1067	*	389	1.22733	7.41362	6.89596e-16	merged_common	260.888	111.427	Promoter	11	87427591	87484766	57176	1	83560	ENSMUST00000156483.1	-179	ENSMUSG00000010342	Tex14	testis expressed gene 14
chr3	121490924	121491532	609	*	184	2.48384	5.42118	6.9494e-16	ATAC_PL_unique	101.343	18.1168	Intron (ENSMUST00000039197.8/213603, intron 10 of 14)	3	121459528	121460911	1384	2	213603	ENSMUST00000198335.1	-30013	ENSMUSG00000039865	Slc44a3	solute carrier family 44, member 3
chr12	35884627	35886001	1375	*	751	-0.84898	8.47427	7.01542e-16	merged_common	264.987	477.302	Distal Intergenic	12	35925620	35949736	24117	1	403205	ENSMUST00000042101.4	-39619	ENSMUSG00000036231	Agr3	anterior gradient 3
chr2	160225213	160226078	866	*	426	1.04617	7.87273	7.10146e-16	merged_common	336.816	163.104	Distal Intergenic	2	160311393	160313616	2224	2	329554	ENSMUST00000109475.2	87538	ENSMUSG00000074623	Gm826	predicted gene 826
chr12	80885383	80885895	513	*	147	3.36449	4.51809	7.19072e-16	ATAC_PL_unique	73.5338	7.13961	Exon (ENSMUST00000181082.1/ENSMUST00000181082.1, exon 2 of 2)	12	80923432	80924449	1018	2	67340	ENSMUST00000190431.1	38554	ENSMUSG00000101912	1700052I22Rik	RIKEN cDNA 1700052I22 gene
chr16	35869024	35869931	908	*	199	1.79967	6.34892	7.25524e-16	merged_common	152.087	43.6856	Intron (ENSMUST00000042665.8/547253, intron 1 of 16)	16	35857265	35871382	14118	2	547253	ENSMUST00000142946.7	1451	ENSMUSG00000034422	Parp14	poly (ADP-ribose) polymerase family, member 14
chr2	101780884	101782481	1598	*	629	0.82799	8.54685	7.43276e-16	merged_common	498.291	280.694	Intron (ENSMUST00000171088.7/72446, intron 1 of 8)	2	101717250	101797650	80401	2	72446	ENSMUST00000141814.1	15169	ENSMUSG00000032841	Prr5l	proline rich 5 like
chr2	154657557	154658361	805	*	508	1.28892	7.28665	7.4598e-16	merged_common	244.063	99.8846	Promoter	2	154657018	154694785	37768	1	75608	ENSMUST00000044277.9	539	ENSMUSG00000038467	Chmp4b	charged multivesicular body protein 4B
chr1	36571328	36572936	1609	*	488	0.99673	8.01492	7.56016e-16	merged_common	365.388	183.109	Intron (ENSMUST00000170295.7/381337, intron 12 of 14)	1	36548642	36558349	9708	2	20353	ENSMUST00000114991.7	-12979	ENSMUSG00000026121	Sema4c	sema domain, immunoglobulin domain (Ig), transmembrane domain (TM) and short cytoplasmic domain, (semaphorin) 4C
chr5	52431067	52432025	959	*	632	-1.1518	7.6015	7.71337e-16	merged_common	130.292	289.496	Intron (ENSMUST00000198008.4/100503884, intron 3 of 4)	5	52441159	52443252	2094	1	100041805	ENSMUST00000196113.1	-9134	NA	Gm3519	predicted gene 3519
chr10	80751238	80751364	127	*	66	1.58742	6.68316	7.80143e-16	ATAC_PL_unique	178.14	59.279	Distal Intergenic	10	80755206	80795461	40256	1	208266	ENSMUST00000105336.8	-3842	ENSMUSG00000061589	Dot1l	DOT1-like, histone H3 methyltransferase (S. cerevisiae)
chr2	30772789	30773327	539	*	253	3.73798	4.22561	7.9517e-16	ATAC_PL_unique	68.3372	5.12169	Distal Intergenic	2	30795468	30796664	1197	2	73598	ENSMUST00000130396.7	23337	ENSMUSG00000044320	1700001O22Rik	RIKEN cDNA 1700001O22 gene
chr1	36566235	36567065	831	*	500	1.52631	6.78789	8.03818e-16	merged_common	187.539	65.1067	Intron (ENSMUST00000170295.7/381337, intron 12 of 14)	1	36548642	36558349	9708	2	20353	ENSMUST00000114991.7	-7886	ENSMUSG00000026121	Sema4c	sema domain, immunoglobulin domain (Ig), transmembrane domain (TM) and short cytoplasmic domain, (semaphorin) 4C
chr7	16258738	16259760	1023	*	584	1.17533	7.54072	8.05128e-16	merged_common	279.826	123.902	Promoter	7	16246743	16259540	12798	2	12273	ENSMUST00000050770.5	0	ENSMUSG00000049130	C5ar1	complement component 5a receptor 1
chr17	24162656	24164097	1442	*	1034	1.08971	7.75266	8.29193e-16	merged_common	314.631	147.831	Promoter	17	24155833	24163664	7832	2	245847	ENSMUST00000129523.2	0	ENSMUSG00000036820	Amdhd2	amidohydrolase domain containing 2
chr6	81447393	81448544	1152	*	566	-0.85832	8.43802	8.29571e-16	merged_common	257.577	466.968	Distal Intergenic	6	81895590	81895663	74	2	102465711	ENSMUST00000197929.1	447119	ENSMUSG00000106154	Mir7232	microRNA 7232
chr5	53194506	53195337	832	*	516	-1.45753	6.92118	8.53908e-16	merged_common	73.1312	200.846	Intron (ENSMUST00000031090.7/231238, intron 2 of 23)	5	53145166	53213315	68150	2	231238	ENSMUST00000196435.4	17978	ENSMUSG00000029189	Sel1l3	sel-1 suppressor of lin-12-like 3 (C. elegans)
chr7	107649030	107649810	781	*	319	-1.45753	6.92118	8.53908e-16	merged_common	73.1312	200.846	Intron (ENSMUST00000207852.1/19024, intron 2 of 2)	7	107606844	107748583	141740	1	19024	ENSMUST00000098134.4	42186	ENSMUSG00000036528	Ppfibp2	PTPRF interacting protein, binding protein 2 (liprin beta 2)
chr10	111411368	111412301	934	*	350	-1.41957	7.00075	8.80506e-16	merged_common	78.3013	209.461	Distal Intergenic	10	111473223	111496884	23662	1	53605	ENSMUST00000065917.15	-60922	ENSMUSG00000058799	Nap1l1	nucleosome assembly protein 1-like 1
chr14	121646103	121647633	1531	*	682	-1.10469	7.72108	8.87174e-16	merged_common	143.881	309.421	Intron (ENSMUST00000212376.2/105445, intron 9 of 54)	14	121543196	121605244	62049	2	105445	ENSMUST00000212416.1	-40859	ENSMUSG00000025558	Dock9	dedicator of cytokinesis 9
chr12	112581048	112581514	467	*	255	2.33667	5.56689	9.04216e-16	merged_common	106.538	21.091	Distal Intergenic	12	112588784	112614957	26174	1	70435	ENSMUST00000101029.3	-7270	ENSMUSG00000037679	Inf2	inverted formin, FH2 and WH2 domain containing
chr12	25378060	25378490	431	*	223	1.97674	6.07137	9.15257e-16	merged_common	133.412	33.895	Intron (ENSMUST00000221460.1/ENSMUST00000221460.1, intron 2 of 3)	12	25129174	25134931	5758	1	432641	ENSMUST00000223429.1	248886	NA	Gm17746	predicted gene, 17746
chr4	137871408	137871814	407	*	234	2.75896	5.09615	9.22278e-16	ATAC_PL_unique	88.9936	13.1471	Intron (ENSMUST00000102518.9/230857, intron 1 of 19)	4	137862237	137965229	102993	1	230857	ENSMUST00000102518.9	9171	ENSMUSG00000057530	Ece1	endothelin converting enzyme 1
chr12	116596990	116597309	320	*	143	2.75896	5.09615	9.22278e-16	ATAC_PL_unique	88.9936	13.1471	Exon (ENSMUST00000186869.1/ENSMUST00000186869.1, exon 1 of 1)	12	116485833	117276793	790961	1	19276	ENSMUST00000070733.8	111157	ENSMUSG00000056553	Ptprn2	protein tyrosine phosphatase, receptor type, N polypeptide 2
chr7	101027308	101027463	156	*	96	2.26228	5.65899	1.00395e-15	ATAC_PL_unique	110.671	23.0685	Distal Intergenic	7	100999032	101012866	13835	2	18442	ENSMUST00000207049.1	-14442	ENSMUSG00000032860	P2ry2	purinergic receptor P2Y, G-protein coupled 2
chr8	111726057	111726641	585	*	208	2.26228	5.65899	1.00395e-15	ATAC_PL_unique	110.671	23.0685	Intron (ENSMUST00000166232.3/12927, intron 1 of 6)	8	111719392	111732105	12714	2	12927	ENSMUST00000212147.1	5464	ENSMUSG00000031955	Bcar1	breast cancer anti-estrogen resistance 1
chr2	178869091	178869738	648	*	173	-2.02981	5.97144	1.02376e-15	merged_common	31.0503	126.794	Distal Intergenic	2	178460630	178466572	5943	1	381409	ENSMUST00000176869.1	408461	ENSMUSG00000039155	Cdh26	cadherin-like 26
chr11	16987429	16988526	1098	*	501	1.34135	7.15111	1.03751e-15	merged_common	226.252	89.2905	Exon (ENSMUST00000102881.9/56193, exon 6 of 10)	11	16994820	17002999	8180	2	56193	ENSMUST00000156101.1	14473	ENSMUSG00000020120	Plek	pleckstrin
chr7	142462571	142463316	746	*	467	2.22849	5.70257	1.03922e-15	ATAC_PL_unique	112.737	24.056	Intron (ENSMUST00000105968.7/16985, intron 1 of 10)	7	142460864	142494603	33740	1	16985	ENSMUST00000105967.7	1707	ENSMUSG00000018819	Lsp1	lymphocyte specific 1
chr8	106526644	106527543	900	*	730	2.52057	5.35841	1.05008e-15	ATAC_PL_unique	98.2711	17.1261	Intron (ENSMUST00000080797.7/12560, intron 2 of 15)	8	106510891	106557297	46407	1	12560	ENSMUST00000080797.7	15753	ENSMUSG00000061048	Cdh3	cadherin 3
chr4	3681310	3682150	841	*	507	1.64111	6.5606	1.05434e-15	merged_common	166.705	53.4473	Intron (ENSMUST00000041377.12/17096, intron 1 of 12)	4	3678130	3739176	61047	1	17096	ENSMUST00000145083.1	3180	ENSMUSG00000042228	Lyn	LYN proto-oncogene, Src family tyrosine kinase
chr3	81782343	81783740	1398	*	776	-0.73435	8.85699	1.05954e-15	merged_common	359.492	598.068	Distal Intergenic	3	81802025	81805161	3137	1	320566	ENSMUST00000193672.1	-18285	ENSMUSG00000103695	A830029E22Rik	RIKEN cDNA A830029E22 gene
chr1	165186723	165189400	2678	*	686	-1.16981	7.53937	1.11602e-15	merged_common	124.023	279.03	3' UTR	1	165179238	165194317	15080	2	108735	ENSMUST00000192565.1	4917	ENSMUSG00000040848	Sft2d2	SFT2 domain containing 2
chr3	59118237	59118535	299	*	107	3.21471	4.63339	1.12691e-15	ATAC_PL_unique	75.6226	8.14568	Intron (ENSMUST00000199659.4/329650, intron 15 of 43)	3	59114626	59130622	15997	2	140795	ENSMUST00000091112.5	12087	ENSMUSG00000036381	P2ry14	purinergic receptor P2Y, G-protein coupled, 14
chr10	60209269	60209797	529	*	227	2.6867	5.16546	1.13089e-15	ATAC_PL_unique	91.0641	14.1439	Intron (ENSMUST00000135158.8/53374, intron 1 of 3)	10	60181532	60219260	37729	2	53374	ENSMUST00000135158.8	9463	ENSMUSG00000057337	Chst3	carbohydrate sulfotransferase 3
chr17	28463663	28464289	627	*	331	2.6867	5.16546	1.13089e-15	ATAC_PL_unique	91.0641	14.1439	Intron (ENSMUST00000079413.10/14229, intron 1 of 10)	17	28400638	28486093	85456	2	14229	ENSMUST00000233870.1	21804	ENSMUSG00000024222	Fkbp5	FK506 binding protein 5
chr16	26034782	26036222	1441	*	970	-1.2049	7.45647	1.14987e-15	merged_common	115.682	266.672	Intron (ENSMUST00000039990.5/210530, intron 1 of 14)	16	25997161	26014593	17433	2	210530	ENSMUST00000159161.1	-20189	ENSMUSG00000038168	P3h2	prolyl 3-hydroxylase 2
chr7	134697272	134698003	732	*	411	-1.59148	6.6709	1.17186e-15	merged_common	58.6948	176.882	Intron (ENSMUST00000211570.1/330662, intron 1 of 26)	7	134671122	134778200	107079	1	330662	ENSMUST00000210464.1	26150	ENSMUSG00000058325	Dock1	dedicator of cytokinesis 1
chr11	69039995	69041390	1396	*	990	1.55163	6.73457	1.19462e-15	merged_common	182.327	62.1962	Distal Intergenic	11	69045647	69051664	6018	1	20877	ENSMUST00000108666.7	-4257	ENSMUSG00000020897	Aurkb	aurora kinase B
chr5	9015263	9016217	955	*	369	-1.35281	7.12958	1.21333e-15	merged_common	87.6192	223.787	Distal Intergenic	5	8966033	8997324	31292	2	74114	ENSMUST00000003720.4	-17939	ENSMUSG00000003623	Crot	carnitine O-octanoyltransferase
chr4	136876368	136879613	3246	*	2075	1.6163	6.59984	1.26738e-15	merged_common	169.835	55.3952	Downstream (<1kb)	4	136880129	136886187	6059	2	12260	ENSMUST00000046384.8	6574	ENSMUSG00000036905	C1qb	complement component 1, q subcomponent, beta polypeptide
chr9	50833429	50834498	1070	*	521	-1.15334	7.56705	1.28411e-15	merged_common	127.149	282.816	Intron (ENSMUST00000034561.10/102580, intron 14 of 14)	9	50835571	50843091	7521	1	102580	ENSMUST00000162596.1	-1073	ENSMUSG00000032059	Alg9	asparagine-linked glycosylation 9 (alpha 1,2 mannosyltransferase)
chr3	130360749	130361314	566	*	290	-1.91653	6.13398	1.30983e-15	merged_common	36.1448	136.452	Intron (ENSMUST00000143830.2/77018, intron 2 of 19)	3	130180891	130599877	418987	1	77018	ENSMUST00000106353.1	179858	ENSMUSG00000058897	Col25a1	collagen, type XXV, alpha 1
chr11	100737804	100738668	865	*	447	0.98839	8.01084	1.34035e-15	merged_common	363.304	183.12	Promoter	11	100715009	100738215	23207	2	19345	ENSMUST00000107364.7	0	ENSMUSG00000019173	Rab5c	RAB5C, member RAS oncogene family
chr11	83544020	83545141	1122	*	415	1.20853	7.42899	1.35994e-15	merged_common	261.969	113.357	Distal Intergenic	11	83525778	83530518	4741	2	20304	ENSMUST00000035938.2	-13502	ENSMUSG00000035042	Ccl5	chemokine (C-C motif) ligand 5
chr7	82838097	82839425	1329	*	474	-1.05963	7.79975	1.36011e-15	merged_common	154.336	321.698	Distal Intergenic	7	82867333	82871515	4183	1	108797	ENSMUST00000082237.6	-27908	ENSMUSG00000057706	Mex3b	mex3 RNA binding family member B
chr13	97168829	97172124	3296	*	839	-1.565	6.70734	1.36035e-15	merged_common	60.7512	179.749	Promoter	13	97171449	97177486	6038	1	320806	ENSMUST00000159321.1	0	ENSMUSG00000021666	Gfm2	G elongation factor, mitochondrial 2
chr7	19804820	19805962	1143	*	368	3.96639	4.0222	1.37962e-15	ATAC_PL_unique	64.2398	4.10962	Downstream (2-3kb)	7	19808462	19809663	1202	2	12051	ENSMUST00000135609.7	3701	ENSMUSG00000053175	Bcl3	B cell leukemia/lymphoma 3
chr3	85595945	85597273	1329	*	353	-1.65145	6.56866	1.42548e-15	merged_common	53.5545	168.241	Intron (ENSMUST00000107672.7/229487, intron 2 of 11)	3	85574195	85654158	79964	1	229487	ENSMUST00000029726.5	21750	ENSMUSG00000028085	Gatb	glutamyl-tRNA(Gln) amidotransferase, subunit B
chr11	103964031	103964384	354	*	92	3.52202	4.37744	1.4467e-15	ATAC_PL_unique	70.4462	6.13231	Distal Intergenic	11	103966739	103985337	18599	1	11841	ENSMUST00000057921.9	-2355	ENSMUSG00000062421	Arf2	ADP-ribosylation factor 2
chr5	147747813	147747905	93	*	60	1.98528	6.03338	1.52646e-15	ATAC_PL_unique	130.33	32.9165	Intron (ENSMUST00000202338.1/ENSMUST00000202338.1, intron 1 of 1)	5	147561604	147726011	164408	2	14254	ENSMUST00000031653.11	-21802	ENSMUSG00000029648	Flt1	FMS-like tyrosine kinase 1
chr5	122778694	122780050	1357	*	881	1.1069	7.67485	1.53133e-15	merged_common	299.892	139.237	Promoter	5	122731170	122779382	48213	2	207565	ENSMUST00000111668.7	0	ENSMUSG00000029471	Camkk2	calcium/calmodulin-dependent protein kinase kinase 2, beta
chr16	42896816	42897597	782	*	456	-1.08084	7.75042	1.53367e-15	merged_common	148.056	313.178	Exon (ENSMUST00000231971.1/100503040, exon 2 of 4)	16	42907392	43072468	165077	1	56490	ENSMUST00000131689.7	-9795	ENSMUSG00000022708	Zbtb20	zinc finger and BTB domain containing 20
chr7	139224414	139225257	844	*	446	1.50507	6.79874	1.54674e-15	merged_common	187.569	66.0829	Intron (ENSMUST00000016124.14/76612, intron 5 of 10)	7	139220898	139226204	5307	1	76612	ENSMUST00000130248.1	3516	ENSMUSG00000015980	Lrrc27	leucine rich repeat containing 27
chr11	121672701	121673889	1189	*	610	0.77052	8.70856	1.55122e-15	merged_common	546.402	320.304	Promoter	11	121616197	121673153	56957	2	210004	ENSMUST00000067399.13	0	ENSMUSG00000046605	B3gntl1	UDP-GlcNAc:betaGal beta-1,3-N-acetylglucosaminyltransferase-like 1
chr2	129359907	129361230	1324	*	486	1.36018	7.08049	1.56885e-15	merged_common	216.854	84.4719	Distal Intergenic	2	129365122	129367351	2230	2	16176	ENSMUST00000141979.1	6121	ENSMUSG00000027398	Il1b	interleukin 1 beta
chr19	10858169	10862743	4575	*	2198	1.76794	6.36513	1.58809e-15	merged_common	152.124	44.6677	3' UTR	19	10857834	10869778	11945	2	98170	ENSMUST00000120524.1	7035	ENSMUSG00000024736	Tmem132a	transmembrane protein 132A
chr6	115666665	115667011	347	*	124	3.08616	4.73685	1.65732e-15	ATAC_PL_unique	77.7047	9.14999	Intron (ENSMUST00000112949.7/110157, intron 1 of 16)	6	115618569	115675964	57396	2	110157	ENSMUST00000112949.7	8953	ENSMUSG00000000441	Raf1	v-raf-leukemia viral oncogene 1
chr5	88572933	88574017	1085	*	682	0.8959	8.2793	1.65872e-15	merged_common	423.803	227.757	Intron (ENSMUST00000196894.4/52822, intron 1 of 12)	5	88565040	88651392	86353	1	52822	ENSMUST00000198965.4	7893	ENSMUSG00000029291	Rufy3	RUN and FYVE domain containing 3
chr4	155186995	155187691	697	*	316	1.13684	7.6186	1.6621e-15	merged_common	291.433	132.53	Promoter	4	155154075	155188296	34222	2	20481	ENSMUST00000129314.1	605	ENSMUSG00000029050	Ski	ski sarcoma viral oncogene homolog (avian)
chr1	153535244	153536159	916	*	520	1.13684	7.6186	1.6621e-15	merged_common	291.433	132.53	Exon (ENSMUST00000041874.8/74091, exon 4 of 12)	1	153503015	153550045	47031	2	74091	ENSMUST00000041874.8	13886	ENSMUSG00000042684	Npl	N-acetylneuraminate pyruvate lyase
chr16	13986559	13987338	780	*	406	1.78002	6.3393	1.74278e-15	merged_common	150.051	43.6918	Promoter	16	13986604	14101500	114897	1	67254	ENSMUST00000056521.11	0	ENSMUSG00000044117	Bmerb1	bMERB domain containing 1
chr1	171761736	171762449	714	*	474	2.89321	4.92587	1.74287e-15	ATAC_PL_unique	82.8526	11.1523	Distal Intergenic	1	171767127	171801184	34058	1	27218	ENSMUST00000015460.4	-4678	ENSMUSG00000015316	Slamf1	signaling lymphocytic activation molecule family member 1
chr5	114783703	114784125	423	*	190	2.18383	5.73837	1.74862e-15	ATAC_PL_unique	113.794	25.0451	Intron (ENSMUST00000102578.10/68420, intron 1 of 14)	5	114786045	114803611	17567	1	68420	ENSMUST00000137519.1	-1920	ENSMUSG00000041870	Ankrd13a	ankyrin repeat domain 13a
chr11	82952021	82953110	1090	*	718	2.18383	5.73837	1.74862e-15	merged_common	113.794	25.0451	Promoter	11	82952095	82960012	7918	1	327978	ENSMUST00000108158.8	0	ENSMUSG00000054404	Slfn5	schlafen 5
chr17	37471416	37472265	850	*	330	-2.12955	5.81877	1.76871e-15	merged_common	26.9833	118.074	3' UTR	17	37466208	37467152	945	1	258832	ENSMUST00000031086.4	5208	ENSMUSG00000029184	Olfr109	olfactory receptor 109
chr12	40292682	40293777	1096	*	494	-1.25166	7.31488	1.83378e-15	merged_common	103.182	245.692	Distal Intergenic	12	40216189	40248504	32316	2	15982	ENSMUST00000164354.1	-44178	ENSMUSG00000001627	Ifrd1	interferon-related developmental regulator 1
chr17	26497169	26498136	968	*	647	1.06365	7.79459	1.84015e-15	merged_common	320.997	153.571	Distal Intergenic	17	26506516	26507723	1208	2	19252	ENSMUST00000146077.1	9587	ENSMUSG00000024190	Dusp1	dual specificity phosphatase 1
chr11	69096755	69097800	1046	*	388	1.41646	6.9881	1.86532e-15	merged_common	207.408	77.7015	Intron (ENSMUST00000101004.8/18626, intron 1 of 17)	11	69098948	69109960	11013	1	18626	ENSMUST00000021271.13	-1148	ENSMUSG00000020893	Per1	period circadian clock 1
chr6	54718464	54719971	1508	*	545	-1.01312	7.92539	1.88972e-15	merged_common	171.116	345.358	Distal Intergenic	6	54681802	54689520	7719	1	68235	ENSMUST00000185518.1	36662	ENSMUSG00000038065	Mturn	maturin, neural progenitor differentiation regulator homolog (Xenopus)
chr2	172430365	172431273	909	*	382	-1.47093	6.86529	1.92657e-15	merged_common	70.0263	194.113	Intron (ENSMUST00000103073.8/320664, intron 5 of 5)	2	172440556	172469908	29353	1	66404	ENSMUST00000029005.3	-9283	ENSMUSG00000027502	Rtf2	replication termination factor 2
chr6	8655502	8655913	412	*	71	-2.6989	5.14154	1.96021e-15	ATAC_PP_unique	13.8527	89.9462	Intron (ENSMUST00000156695.7/15893, intron 8 of 10)	6	8630699	8647819	17121	2	15893	ENSMUST00000145870.1	-7683	ENSMUSG00000062995	Ica1	islet cell autoantigen 1
chr7	84163299	84164295	997	*	481	-1.03228	7.87167	1.96125e-15	merged_common	163.77	334.952	Intron (ENSMUST00000208236.1/ENSMUST00000208236.1, intron 2 of 4)	7	84109356	84151893	42538	2	70178	ENSMUST00000117085.1	-11406	ENSMUSG00000038459	Abhd17c	abhydrolase domain containing 17C
chr5	101785260	101785781	522	*	307	-1.50011	6.81468	1.99343e-15	merged_common	66.932	189.327	Exon (ENSMUST00000199649.1/ENSMUST00000199649.1, exon 1 of 1)	5	101765130	101823858	58729	1	74596	ENSMUST00000031273.8	20130	ENSMUSG00000029330	Cds1	CDP-diacylglycerol synthase 1
chr16	22517348	22518129	782	*	473	-1.42407	6.94447	2.0017e-15	merged_common	75.1882	201.761	Exon (ENSMUST00000159309.1/78082, exon 2 of 2)	16	22511480	22517681	6202	1	78082	ENSMUST00000159309.1	5868	ENSMUSG00000089874	9230117E06Rik	RIKEN cDNA 9230117E06 gene
chr11	120353373	120354245	873	*	482	1.52378	6.76508	2.03035e-15	merged_common	184.435	64.1417	Distal Intergenic	11	120348678	120351190	2513	1	66838	ENSMUST00000143813.1	4695	ENSMUSG00000043644	0610009L18Rik	RIKEN cDNA 0610009L18 gene
chr12	10755782	10755874	93	*	58	-1.90618	6.12869	2.07136e-15	ATAC_PP_unique	36.1419	135.465	Distal Intergenic	12	10526775	10531098	4324	1	328061	ENSMUST00000218017.1	229007	ENSMUSG00000112792	Gm38407	predicted gene, 38407
chr14	63128586	63129712	1127	*	612	1.02193	7.8941	2.1032e-15	merged_common	338.982	166.934	Intron (ENSMUST00000006235.8/13030, intron 1 of 9)	14	63135518	63141863	6346	1	13030	ENSMUST00000225540.1	-5806	ENSMUSG00000021939	Ctsb	cathepsin B
chr15	102147469	102148215	747	*	356	2.40749	5.46018	2.19455e-15	ATAC_PL_unique	101.401	19.1124	Exon (ENSMUST00000023807.6/16012, exon 2 of 4)	15	102150526	102163469	12944	1	223920	ENSMUST00000023806.13	-2311	ENSMUSG00000023045	Soat2	sterol O-acyltransferase 2
chr11	103050839	103052157	1319	*	588	1.01531	7.91529	2.24616e-15	merged_common	343.209	169.793	Intron (ENSMUST00000181125.1/ENSMUST00000181125.1, intron 1 of 1)	11	103070585	103071750	1166	2	72469	ENSMUST00000124740.1	19593	ENSMUSG00000020937	Plcd3	phospholipase C, delta 3
chr6	73656937	73657922	986	*	657	-1.9375	6.06044	2.31848e-15	merged_common	34.0998	130.616	Distal Intergenic	6	73586109	73608673	22565	2	102634075	ENSMUST00000204638.1	-48264	ENSMUSG00000107441	Gm31747	predicted gene, 31747
chr9	52368000	52368461	462	*	320	-1.9375	6.06044	2.31848e-15	merged_common	34.0998	130.616	Distal Intergenic	9	52111985	52168111	56127	2	244871	ENSMUST00000165519.1	-199889	ENSMUSG00000035164	Zc3h12c	zinc finger CCCH type containing 12C
chr9	16212726	16216879	4154	*	2853	-0.54419	9.67492	2.41876e-15	merged_common	676.912	987.074	Intron (ENSMUST00000217308.1/270120, intron 3 of 25)	9	15910205	16378231	468027	2	270120	ENSMUST00000082170.5	161352	ENSMUSG00000074505	Fat3	FAT atypical cadherin 3
chr4	15233843	15235205	1363	*	909	-1.65437	6.54207	2.42659e-15	merged_common	52.5233	165.336	Distal Intergenic	4	15265831	15286753	20923	1	100201	ENSMUST00000062684.8	-30626	ENSMUSG00000043252	Tmem64	transmembrane protein 64
chr9	25518790	25520197	1408	*	604	-1.14357	7.56206	2.4445e-15	merged_common	127.14	280.887	Intron (ENSMUST00000040677.5/67484, intron 2 of 7)	9	25482867	25487313	4447	1	67484	ENSMUST00000156237.1	35923	ENSMUSG00000036611	Eepd1	endonuclease/exonuclease/phosphatase family domain containing 1
chr2	118646694	118647438	745	*	198	-1.45688	6.87932	2.45222e-15	merged_common	71.0558	195.058	Distal Intergenic	2	118631540	118636749	5210	1	12236	ENSMUST00000126013.1	15154	ENSMUSG00000040084	Bub1b	BUB1B, mitotic checkpoint serine/threonine kinase
chr7	92980118	92981793	1676	*	832	-0.83766	8.45105	2.45978e-15	merged_common	261.782	467.843	Exon (ENSMUST00000208481.1/ENSMUST00000208481.1, exon 2 of 7)	7	92875300	92934014	58715	1	72461	ENSMUST00000207594.1	104818	ENSMUSG00000061119	Prcp	prolylcarboxypeptidase (angiotensinase C)
chr11	116029870	116031353	1484	*	365	1.07964	7.7384	2.47421e-15	merged_common	310.451	146.889	Promoter	11	116030322	116061214	30893	1	217331	ENSMUST00000021116.11	0	ENSMUSG00000020770	Unk	unkempt family zinc finger
chr14	75033963	75034885	923	*	470	0.84457	8.42322	2.47675e-15	merged_common	460.005	256.166	Intron (ENSMUST00000036072.7/271221, intron 2 of 13)	14	75036622	75052525	15904	1	271221	ENSMUST00000228689.1	-1737	ENSMUSG00000034959	Rubcnl	RUN and cysteine rich domain containing beclin 1 interacting protein like
chr7	43273295	43274202	908	*	334	1.99434	5.99434	2.5434e-15	merged_common	127.249	31.9373	Distal Intergenic	7	43296523	43311486	14964	2	69930	ENSMUST00000048015.13	37284	ENSMUSG00000012640	Zfp715	zinc finger protein 715
chr16	11071567	11072402	836	*	565	-1.51572	6.77729	2.62764e-15	merged_common	64.8678	185.484	5' UTR	16	11066330	11074985	8656	1	20621	ENSMUST00000089011.5	5237	ENSMUSG00000037972	Snn	stannin
chr13	49271741	49272811	1071	*	443	-0.94606	8.09791	2.62815e-15	merged_common	197.387	380.286	Intron (ENSMUST00000110087.8/30938, intron 14 of 17)	13	49230829	49248706	17878	2	66329	ENSMUST00000021816.11	-23035	ENSMUSG00000021384	Susd3	sushi domain containing 3
chr16	24392577	24394188	1612	*	703	1.11623	7.62914	2.63579e-15	merged_common	291.48	134.459	Promoter	16	24393507	24685183	291677	1	210126	ENSMUST00000231352.1	0	ENSMUSG00000033306	Lpp	LIM domain containing preferred translocation partner in lipoma
chr18	39020432	39021390	959	*	585	1.01453	7.90682	2.66988e-15	merged_common	341.108	168.845	Intron (ENSMUST00000148850.7/71302, intron 2 of 5)	18	38993476	39371162	377687	1	71302	ENSMUST00000155576.7	26956	ENSMUSG00000036452	Arhgap26	Rho GTPase activating protein 26
chr13	52822627	52823424	798	*	414	2.06204	5.88842	2.7967e-15	merged_common	121.048	28.9883	Distal Intergenic	13	52729922	52757205	27284	2	105404	ENSMUST00000223209.1	-65422	NA	BB123696	expressed sequence BB123696
chr9	87171379	87172728	1350	*	385	-1.04556	7.80236	2.82552e-15	merged_common	155.372	320.713	Intron (ENSMUST00000049457.13/244958, intron 2 of 3)	9	87144343	87184045	39703	1	244958	ENSMUST00000179313.2	27036	ENSMUSG00000042761	Mrap2	melanocortin 2 receptor accessory protein 2
chr2	60903139	60903303	165	*	139	1.86334	6.17298	2.85533e-15	ATAC_PL_unique	137.63	37.8261	Intron (ENSMUST00000028347.12/56878, intron 1 of 13)	2	60842297	60889030	46734	2	56878	ENSMUST00000132529.7	-14109	ENSMUSG00000026970	Rbms1	RNA binding motif, single stranded interacting protein 1
chr5	135478095	135479945	1851	*	1423	1.14786	7.54935	2.89846e-15	merged_common	278.837	125.838	Intron (ENSMUST00000060311.11/215114, intron 1 of 30)	5	135449749	135489258	39510	2	215114	ENSMUST00000201998.1	9313	ENSMUSG00000039959	Hip1	huntingtin interacting protein 1
chr6	37617204	37617939	736	*	385	-0.8438	8.41867	2.92998e-15	merged_common	255.427	458.434	Distal Intergenic	6	37539681	37557508	17828	1	208665	ENSMUST00000123648.1	77523	ENSMUSG00000038641	Akr1d1	aldo-keto reductase family 1, member D1
chr6	135252457	135252906	450	*	182	3.0674	4.72766	2.97175e-15	ATAC_PL_unique	76.7109	9.15119	Intron (ENSMUST00000111909.7/14840, intron 1 of 5)	6	135237329	135254170	16842	2	14840	ENSMUST00000111909.7	1264	ENSMUSG00000030206	Gsg1	germ cell associated 1
chr9	108120506	108121012	507	*	415	2.4905	5.34369	3.04564e-15	ATAC_PL_unique	96.265	17.1298	Intron (ENSMUST00000035208.13/12217, intron 3 of 11)	9	108096023	108110413	14391	2	12217	ENSMUST00000124763.1	-10093	ENSMUSG00000032589	Bsn	bassoon
chr2	145233561	145234603	1043	*	497	-0.7967	8.58015	3.06533e-15	merged_common	290.38	504.426	Intron (ENSMUST00000110007.7/94249, intron 1 of 16)	2	145242611	145642166	399556	1	94249	ENSMUST00000137908.1	-8008	ENSMUSG00000063873	Slc24a3	solute carrier family 24 (sodium/potassium/calcium exchanger), member 3
chr1	171271331	171272930	1600	*	963	1.17744	7.47338	3.07832e-15	merged_common	267.26	118.165	Promoter	1	171271640	171272604	965	1	57370	ENSMUST00000141114.1	0	ENSMUSG00000052423	B4galt3	UDP-Gal:betaGlcNAc beta 1,4-galactosyltransferase, polypeptide 3
chr1	150165411	150165510	100	*	48	1.44633	6.89114	3.10854e-15	ATAC_PL_unique	195.945	71.9027	Promoter	1	150159043	150164948	5906	2	102639566	ENSMUST00000181308.1	-463	ENSMUSG00000097754	Ptgs2os2	prostaglandin-endoperoxide synthase 2, opposite strand 2
chr18	13031339	13032354	1016	*	328	-1.21931	7.36957	3.1307e-15	merged_common	108.377	252.34	Distal Intergenic	18	13007037	13021823	14787	1	225192	ENSMUST00000234565.1	24302	ENSMUSG00000037346	Hrh4	histamine receptor H4
chr13	83064468	83066829	2362	*	1819	-0.78936	8.60776	3.17858e-15	merged_common	296.745	512.867	Exon (ENSMUST00000225970.1/ENSMUST00000225970.1, exon 1 of 4)	13	82698275	82698333	59	2	100628621	ENSMUST00000198795.1	-366135	ENSMUSG00000106655	Mir3961	microRNA 3961
chr11	75459787	75462609	2823	*	1678	0.75651	8.71853	3.23019e-15	merged_common	547.527	324.095	Promoter	11	75461539	75466676	5138	1	100042498	ENSMUST00000149940.1	0	ENSMUSG00000085148	Mir22hg	Mir22 host gene (non-protein coding)
chr6	30243446	30244023	578	*	359	1.46692	6.84194	3.2671e-15	merged_common	190.732	68.9979	Promoter	6	30214809	30243803	28995	2	22214	ENSMUST00000128141.7	0	ENSMUSG00000039159	Ube2h	ubiquitin-conjugating enzyme E2H
chr3	54589673	54590418	746	*	490	-1.42329	6.92402	3.38598e-15	merged_common	74.15	198.868	Distal Intergenic	3	54692807	54728636	35830	1	56790	ENSMUST00000197502.4	-102389	ENSMUSG00000027751	Supt20	suppressor of Ty 20
chr5	135471708	135472990	1283	*	923	1.57549	6.62943	3.39491e-15	merged_common	170.92	57.3486	Exon (ENSMUST00000201839.1/ENSMUST00000201839.1, exon 1 of 1)	5	135436115	135465927	29813	2	215114	ENSMUST00000212301.1	-5781	ENSMUSG00000039959	Hip1	huntingtin interacting protein 1
chr5	118377324	118378027	704	*	379	1.68592	6.47382	3.41706e-15	merged_common	159.43	49.5516	Distal Intergenic	5	118245227	118266093	20867	1	76792	ENSMUST00000049138.7	132097	ENSMUSG00000032840	2410131K14Rik	RIKEN cDNA 2410131K14 gene
chr2	158153695	158154517	823	*	518	1.92469	6.08684	3.47798e-15	merged_common	132.439	34.884	Distal Intergenic	2	158116402	158146436	30035	2	21817	ENSMUST00000103122.9	-7259	ENSMUSG00000037820	Tgm2	transglutaminase 2, C polypeptide
chr11	51915469	51917314	1846	*	787	1.01966	7.86813	3.53227e-15	merged_common	332.673	164.085	Distal Intergenic	11	51967661	51977334	9674	1	52626	ENSMUST00000102763.4	-50347	ENSMUSG00000020392	Cdkn2aipnl	CDKN2A interacting protein N-terminal like
chr16	84620880	84621964	1085	*	649	1.26537	7.2612	3.53303e-15	merged_common	237.846	98.9423	Distal Intergenic	16	84703167	84715245	12079	1	100653389	ENSMUST00000185662.6	-81203	ENSMUSG00000097418	Mir155hg	Mir155 host gene (non-protein coding)
chr18	67405878	67407078	1201	*	771	-1.16674	7.50079	3.55613e-15	merged_common	120.879	271.378	Intron (ENSMUST00000025408.8/69597, intron 16 of 16)	18	67390717	67402748	12032	1	67951	ENSMUST00000001513.6	15161	ENSMUSG00000001473	Tubb6	tubulin, beta 6 class V
chr18	37925812	37926520	709	*	368	1.3782	7.02203	3.59561e-15	merged_common	209.547	80.6124	Intron (ENSMUST00000115634.7/13367, intron 1 of 26)	18	37843603	37935381	91779	2	13367	ENSMUST00000025337.13	8861	ENSMUSG00000024456	Diaph1	diaphanous related formin 1
chr9	21160952	21161947	996	*	537	1.24798	7.30756	3.64002e-15	merged_common	244.137	102.791	Distal Intergenic	9	21165714	21213248	47535	1	18577	ENSMUST00000039413.14	-3767	ENSMUSG00000032177	Pde4a	phosphodiesterase 4A, cAMP specific
chr10	130314074	130314805	732	*	256	-1.64589	6.53774	3.67328e-15	merged_common	52.52	164.357	Distal Intergenic	10	130322877	130364111	41235	1	67596	ENSMUST00000217702.1	-8072	ENSMUSG00000034833	Tespa1	thymocyte expressed, positive selection associated 1
chr6	128629934	128630887	954	*	516	-1.21094	7.37914	3.70894e-15	merged_common	109.415	253.284	Distal Intergenic	6	128619127	128623533	4407	2	17057	ENSMUST00000203150.1	-6401	ENSMUSG00000030361	Klrb1a	killer cell lectin-like receptor subfamily B member 1A
chr17	35262433	35263864	1432	*	570	1.12637	7.60305	3.7127e-15	merged_common	287.264	131.586	Promoter	17	35262730	35267499	4770	1	14964	ENSMUST00000172785.7	0	ENSMUSG00000073411	H2-D1	histocompatibility 2, D region locus 1
chr14	13971518	13972351	834	*	550	-1.47796	6.82553	3.767e-15	merged_common	67.957	189.297	Intron (ENSMUST00000223880.1/246103, intron 1 of 12)	14	13949150	13961852	12703	2	66231	ENSMUST00000225325.1	-9666	ENSMUSG00000053453	Thoc7	THO complex 7
chr3	95650174	95651540	1367	*	610	1.36547	7.04984	3.80578e-15	merged_common	212.685	82.5448	Distal Intergenic	3	95658788	95663176	4389	1	17210	ENSMUST00000037947.14	-7248	ENSMUSG00000038612	Mcl1	myeloid cell leukemia sequence 1
chr7	19627908	19629973	2066	*	894	0.59026	9.41692	3.81921e-15	merged_common	838.723	557.099	Promoter	7	19606217	19629438	23222	2	19698	ENSMUST00000049912.14	0	ENSMUSG00000002983	Relb	avian reticuloendotheliosis viral (v-rel) oncogene related B
chr12	76307825	76308348	524	*	391	1.96244	6.0222	3.87773e-15	merged_common	128.304	32.922	Promoter	12	76307066	76315101	8036	1	108156	ENSMUST00000220321.1	759	ENSMUSG00000021048	Mthfd1	methylenetetrahydrofolate dehydrogenase (NADP+ dependent), methenyltetrahydrofolate cyclohydrolase, formyltetrahydrofolate synthase
chr9	22649613	22650080	468	*	198	-1.56761	6.65871	3.93817e-15	merged_common	58.6844	173.948	Intron (ENSMUST00000039798.15/319845, intron 14 of 21)	9	22643841	22888280	244440	1	319845	ENSMUST00000127296.7	5772	ENSMUSG00000035919	Bbs9	Bardet-Biedl syndrome 9 (human)
chr3	105891411	105893540	2130	*	930	-0.7964	8.56406	3.96019e-15	merged_common	287.19	498.78	Intron (ENSMUST00000164730.1/69296, intron 1 of 1)	3	105904421	105908926	4506	1	11542	ENSMUST00000000574.2	-10881	ENSMUSG00000000562	Adora3	adenosine A3 receptor
chr5	135777903	135779078	1176	*	623	0.8043	8.54969	4.02591e-15	merged_common	495.191	283.566	Promoter	5	135778480	135790391	11912	1	17448	ENSMUST00000019323.10	0	ENSMUSG00000019179	Mdh2	malate dehydrogenase 2, NAD (mitochondrial)
chr6	52802212	52802530	319	*	224	2.95592	4.82193	4.10764e-15	ATAC_PL_unique	78.7872	10.154	Intron (ENSMUST00000136250.5/231986, intron 3 of 4)	6	52768797	52778309	9513	2	231986	ENSMUST00000128282.3	-23903	ENSMUSG00000063568	Jazf1	JAZF zinc finger 1
chr8	125649372	125649912	541	*	251	1.62217	6.52492	4.13142e-15	merged_common	161.569	52.4851	Distal Intergenic	8	125669818	125673359	3542	1	74393	ENSMUST00000053078.4	-19906	ENSMUSG00000050930	Map10	microtubule-associated protein 10
chr15	25281671	25283067	1397	*	873	-0.72218	8.83786	4.14961e-15	merged_common	356.256	587.706	Distal Intergenic	15	25364857	25413698	48842	2	70350	ENSMUST00000228597.1	130631	ENSMUSG00000045763	Basp1	brain abundant, membrane attached signal protein 1
chr4	121196694	121197541	848	*	573	1.32553	7.11196	4.19216e-15	merged_common	218.991	87.3778	Intron (ENSMUST00000056635.12/109263, intron 1 of 7)	4	121170777	121188534	17758	2	109263	ENSMUST00000142647.1	-8160	ENSMUSG00000049878	Rlf	rearranged L-myc fusion sequence
chr8	125845232	125845654	423	*	259	2.29477	5.54638	4.20588e-15	merged_common	103.52	21.0974	Intron (ENSMUST00000047239.12/270109, intron 15 of 33)	8	125751509	125839850	88342	2	270109	ENSMUST00000120589.7	-5382	ENSMUSG00000060212	Pcnx2	pecanex homolog 2
chr15	49065585	49065736	152	*	61	-1.67608	6.43518	4.25252e-15	ATAC_PP_unique	48.4069	154.688	Distal Intergenic	15	47580722	48792063	1211342	2	239420	ENSMUST00000162830.7	-273522	ENSMUSG00000022311	Csmd3	CUB and Sushi multiple domains 3
chr2	26492632	26493993	1362	*	495	1.24075	7.31741	4.33759e-15	merged_common	245.195	103.755	Intron (ENSMUST00000028288.4/18128, intron 2 of 33)	2	26457903	26503822	45920	2	18128	ENSMUST00000028288.4	9829	ENSMUSG00000026923	Notch1	notch 1
chr11	120629232	120630965	1734	*	1346	1.58976	6.58684	4.3542e-15	merged_common	166.77	55.4056	Promoter	11	120629007	120630797	1791	2	17134	ENSMUST00000106182.7	0	ENSMUSG00000051510	Mafg	v-maf musculoaponeurotic fibrosarcoma oncogene family, protein G (avian)
chr2	117109221	117109914	694	*	334	-2.27983	5.59368	4.39778e-15	ATAC_PP_unique	21.9138	106.418	Distal Intergenic	2	117121374	117182279	60906	1	114715	ENSMUST00000028829.12	-11460	ENSMUSG00000027351	Spred1	sprouty protein with EVH-1 domain 1, related sequence
chr6	100481391	100481847	457	*	282	2.25715	5.59368	4.39778e-15	ATAC_PL_unique	105.585	22.0867	Distal Intergenic	6	100527400	100533426	6027	1	73395	ENSMUST00000187986.1	-45553	ENSMUSG00000101553	1700049E22Rik	RIKEN cDNA 1700049E22 gene
chr6	142779807	142780453	647	*	423	2.25715	5.59368	4.39778e-15	ATAC_PL_unique	105.585	22.0867	Distal Intergenic	6	142769966	142771334	1369	1	12764	ENSMUST00000146643.1	9841	ENSMUSG00000030282	Cmas	cytidine monophospho-N-acetylneuraminic acid synthetase
chr12	103332445	103333618	1174	*	697	-1.03139	7.84314	4.42284e-15	merged_common	160.613	328.292	Exon (ENSMUST00000021617.13/65256, exon 6 of 10)	12	103321146	103335584	14439	2	65256	ENSMUST00000127447.1	1966	ENSMUSG00000021200	Asb2	ankyrin repeat and SOCS box-containing 2
chr8	8653446	8654161	716	*	152	-1.50855	6.75042	4.46428e-15	merged_common	63.8292	181.609	Intron (ENSMUST00000001319.14/13642, intron 1 of 4)	8	8617434	8661242	43809	2	13642	ENSMUST00000001319.14	7081	ENSMUSG00000001300	Efnb2	ephrin B2
chr13	83649589	83650574	986	*	397	-0.95788	8.04088	4.53741e-15	merged_common	188.96	367.047	Intron (ENSMUST00000198199.4/17260, intron 7 of 10)	13	83652888	83662739	9852	1	17260	ENSMUST00000197145.1	-2314	ENSMUSG00000005583	Mef2c	myocyte enhancer factor 2C
chr5	30039858	30040279	422	*	252	2.07461	5.845	4.61127e-15	merged_common	117.972	28.0066	Distal Intergenic	5	30013321	30019839	6519	1	16193	ENSMUST00000199765.1	26537	ENSMUSG00000025746	Il6	interleukin 6
chr9	58548813	58549351	539	*	226	2.18885	5.68316	4.64325e-15	merged_common	109.713	24.0628	Intron (ENSMUST00000165365.2/102657, intron 1 of 7)	9	58524298	58555437	31140	2	102657	ENSMUST00000165365.2	6086	ENSMUSG00000035914	Cd276	CD276 antigen
chr1	143813495	143814716	1222	*	623	-0.97237	8.00745	4.64508e-15	merged_common	183.707	360.445	Distal Intergenic	1	143794717	143806941	12225	1	56207	ENSMUST00000185539.1	18778	ENSMUSG00000018189	Uchl5	ubiquitin carboxyl-terminal esterase L5
chr4	125126927	125128281	1355	*	977	0.81617	8.48682	4.64799e-15	merged_common	476.029	270.359	Promoter	4	125118423	125127840	9418	2	230738	ENSMUST00000036188.7	0	ENSMUSG00000042677	Zc3h12a	zinc finger CCCH type containing 12A
chr3	79070989	79072278	1290	*	822	-1.34179	7.07161	4.6845e-15	merged_common	84.4904	214.154	Intron (ENSMUST00000118100.7/76089, intron 20 of 23)	3	79062516	79144977	82462	2	76089	ENSMUST00000118100.7	72699	ENSMUSG00000062232	Rapgef2	Rap guanine nucleotide exchange factor (GEF) 2
chr5	88504354	88505636	1283	*	606	-1.86582	6.14846	4.81451e-15	merged_common	37.1567	135.427	3' UTR	5	88487982	88506049	18068	1	13801	ENSMUST00000031222.8	16372	ENSMUSG00000029286	Enam	enamelin
chr5	111300741	111301205	465	*	223	2.70902	5.07169	4.88003e-15	ATAC_PL_unique	85.9961	13.1517	Distal Intergenic	5	111330763	111388359	57597	1	56305	ENSMUST00000086635.8	-29558	ENSMUSG00000050017	Pitpnb	phosphatidylinositol transfer protein, beta
chr13	92030384	92031098	715	*	516	-1.07928	7.69753	4.92951e-15	merged_common	142.804	301.742	Exon (ENSMUST00000099326.9/19418, exon 5 of 34)	13	91959715	91987989	28275	2	19418	ENSMUST00000142378.1	-42395	ENSMUSG00000021708	Rasgrf2	RAS protein-specific guanine nucleotide-releasing factor 2
chr16	16073122	16074086	965	*	438	1.078	7.69967	4.92951e-15	merged_common	302.056	143.079	Intron (ENSMUST00000040248.8/224008, intron 5 of 19)	16	15893385	16146804	253420	2	224008	ENSMUST00000229846.1	72718	ENSMUSG00000041974	Spidr	scaffolding protein involved in DNA repair
chr19	37493941	37494660	720	*	436	-1.76956	6.28611	5.0127e-15	merged_common	42.2632	144.096	Distal Intergenic	19	37550418	37683245	132828	1	107371	ENSMUST00000066439.6	-55758	ENSMUSG00000053799	Exoc6	exocyst complex component 6
chr12	25438412	25439037	626	*	188	1.78516	6.27609	5.0127e-15	merged_common	143.875	41.7444	Intron (ENSMUST00000221270.1/ENSMUST00000221270.1, intron 6 of 7)	12	25129174	25134931	5758	1	432641	ENSMUST00000223429.1	309238	NA	Gm17746	predicted gene, 17746
chr2	45219429	45220426	998	*	623	-0.95357	8.04671	5.04239e-15	merged_common	190.009	367.983	Distal Intergenic	2	44983632	45117395	133764	2	24136	ENSMUST00000176438.8	-102034	ENSMUSG00000026872	Zeb2	zinc finger E-box binding homeobox 2
chr15	50866732	50867492	761	*	370	1.56675	6.62515	5.09237e-15	merged_common	169.898	57.3521	Intron (ENSMUST00000165201.8/83925, intron 1 of 5)	15	50660435	50882806	222372	2	83925	ENSMUST00000184885.7	15314	ENSMUSG00000038679	Trps1	transcriptional repressor GATA binding 1
chr4	102516580	102518302	1723	*	549	-0.73321	8.79516	5.09384e-15	merged_common	344.547	572.751	Intron (ENSMUST00000106911.7/18578, intron 7 of 16)	4	102470397	102488046	17650	1	18578	ENSMUST00000133632.1	46183	ENSMUSG00000028525	Pde4b	phosphodiesterase 4B, cAMP specific
chr15	78450142	78450540	399	*	96	3.67344	4.19401	5.12583e-15	ATAC_PL_unique	65.3778	5.12407	Intron (ENSMUST00000017086.4/71753, intron 10 of 17)	15	78443783	78444379	597	2	71753	ENSMUST00000230473.1	-5763	ENSMUSG00000016942	Tmprss6	transmembrane serine protease 6
chr5	140606804	140607825	1022	*	463	1.37103	7.01852	5.18954e-15	merged_common	208.519	80.6166	Promoter	5	140607320	140615545	8226	1	16848	ENSMUST00000031555.2	0	ENSMUSG00000029570	Lfng	LFNG O-fucosylpeptide 3-beta-N-acetylglucosaminyltransferase
chr14	51093388	51095349	1962	*	561	-0.90852	8.18299	5.19362e-15	merged_common	212.119	398.173	Promoter	14	51096000	51102005	6006	1	11727	ENSMUST00000069011.8	-651	ENSMUSG00000072115	Ang	angiogenin, ribonuclease, RNase A family, 5
chr11	53762921	53764538	1618	*	810	0.85713	8.34173	5.28404e-15	merged_common	436.638	241.046	Promoter	11	53763597	53763654	58	2	102465772	ENSMUST00000184599.1	0	ENSMUSG00000099153	Mir7671	microRNA 7671
chr9	90033522	90034744	1223	*	575	-0.7679	8.66254	5.32896e-15	merged_common	310.53	528.768	Exon (ENSMUST00000186351.1/ENSMUST00000186351.1, exon 1 of 1)	9	90054152	90065422	11271	1	13036	ENSMUST00000132718.7	-19408	ENSMUSG00000032359	Ctsh	cathepsin H
chr11	106787213	106789704	2492	*	1706	0.81044	8.50893	5.35538e-15	merged_common	482.421	275.08	Promoter	11	106780355	106788532	8178	2	13207	ENSMUST00000021062.11	0	ENSMUSG00000020719	Ddx5	DEAD (Asp-Glu-Ala-Asp) box polypeptide 5
chr17	48230664	48231042	379	*	148	2.85771	4.90849	5.42759e-15	ATAC_PL_unique	80.8595	11.1551	Distal Intergenic	17	48232768	48246362	13595	1	58217	ENSMUST00000113251.9	-1726	ENSMUSG00000042265	Trem1	triggering receptor expressed on myeloid cells 1
chr5	121397455	121398637	1183	*	488	1.29555	7.1745	5.48282e-15	merged_common	226.329	92.2019	Promoter	5	121397936	121442409	44474	1	231713	ENSMUST00000042163.14	0	ENSMUSG00000042719	Naa25	N(alpha)-acetyltransferase 25, NatB auxiliary subunit
chr13	96510636	96511226	591	*	105	1.4941	6.77212	5.74745e-15	merged_common	183.441	65.1219	Intron (ENSMUST00000022172.11/27015, intron 3 of 14)	13	96482170	96519160	36991	2	27015	ENSMUST00000091387.3	7934	ENSMUSG00000021668	Polk	polymerase (DNA directed), kappa
chr10	100138259	100139247	989	*	492	-1.15881	7.4842	5.82762e-15	merged_common	119.826	267.539	Exon (ENSMUST00000218902.1/ENSMUST00000218902.1, exon 2 of 4)	10	100088056	100097181	9126	1	17311	ENSMUST00000219881.1	50203	ENSMUSG00000019966	Kitl	kit ligand
chr6	124375385	124375910	526	*	281	-1.55957	6.6546	5.8819e-15	merged_common	58.6807	172.971	Distal Intergenic	6	124363301	124364519	1219	2	72268	ENSMUST00000203901.1	-10866	NA	1700027F06Rik	RIKEN cDNA 1700027F06 gene
chr1	174353699	174354062	364	*	152	-1.80194	6.23074	5.96743e-15	merged_common	40.218	140.236	Distal Intergenic	1	174368919	174369848	930	1	258238	ENSMUST00000085862.1	-14857	ENSMUSG00000066672	Olfr417	olfactory receptor 417
chr11	61407616	61408507	892	*	472	1.31866	7.1086	6.00054e-15	merged_common	217.962	87.3824	Exon (ENSMUST00000210265.1/ENSMUST00000210265.1, exon 1 of 1)	11	61362886	61378345	15460	2	67473	ENSMUST00000148671.1	-29271	ENSMUSG00000010122	Slc47a1	solute carrier family 47, member 1
chr6	122869820	122870919	1100	*	335	1.44689	6.85217	6.0908e-15	merged_common	190.76	69.9729	Distal Intergenic	6	122874474	122888941	14468	1	67602	ENSMUST00000032477.5	-3555	ENSMUSG00000030327	Necap1	NECAP endocytosis associated 1
chr8	125066488	125068464	1977	*	830	0.87446	8.28665	6.17154e-15	merged_common	422.814	230.627	Intron (ENSMUST00000074562.10/244667, intron 1 of 12)	8	125054230	125261148	206919	1	244667	ENSMUST00000121953.1	12258	ENSMUSG00000043051	Disc1	disrupted in schizophrenia 1
chr7	125593895	125594329	435	*	130	2.37832	5.44589	6.20866e-15	ATAC_PL_unique	99.3915	19.1163	Distal Intergenic	7	125603429	125631506	28078	1	60504	ENSMUST00000206234.1	-9100	ENSMUSG00000030745	Il21r	interleukin 21 receptor
chr1	163283867	163284820	954	*	549	0.99222	7.93592	6.34118e-15	merged_common	345.377	173.622	Exon (ENSMUST00000174098.1/18933, exon 2 of 2)	1	163247577	163289224	41648	2	18933	ENSMUST00000183691.2	4404	ENSMUSG00000026586	Prrx1	paired related homeobox 1
chr10	79877761	79878368	608	*	104	1.97095	5.98289	6.4803e-15	ATAC_PL_unique	125.224	31.9427	Intron (ENSMUST00000163188.7/19152, intron 1 of 3)	10	79879614	79883174	3561	1	19152	ENSMUST00000006679.14	-1246	ENSMUSG00000057729	Prtn3	proteinase 3
chr12	71460561	71461230	670	*	414	-1.96062	5.98289	6.4803e-15	merged_common	32.0573	124.776	Intron (ENSMUST00000221650.1/ENSMUST00000221650.1, intron 5 of 5)	12	71488285	71556133	67849	1	73815	ENSMUST00000222756.1	-27055	ENSMUSG00000113630	4930404H11Rik	RIKEN cDNA 4930404H11 gene
chr5	45580248	45581030	783	*	508	-1.6072	6.5736	6.55091e-15	merged_common	54.5686	166.249	Exon (ENSMUST00000016023.8/58227, exon 5 of 16)	5	45529705	45536542	6838	2	58227	ENSMUST00000198680.1	-43706	ENSMUSG00000015879	Fam184b	family with sequence similarity 184, member B
chr2	153111281	153111885	605	*	311	2.33506	5.49718	6.6385e-15	ATAC_PL_unique	101.456	20.1073	Intron (ENSMUST00000189688.1/15162, intron 1 of 12)	2	153108693	153151149	42457	1	15162	ENSMUST00000191431.7	2588	ENSMUSG00000003283	Hck	hemopoietic cell kinase
chr1	131083555	131084966	1412	*	718	1.05186	7.7526	6.70123e-15	merged_common	310.517	149.777	Intron (ENSMUST00000016672.10/17164, intron 1 of 9)	1	131056889	131072526	15638	2	17164	ENSMUST00000188459.3	-11029	ENSMUSG00000016528	Mapkapk2	MAP kinase-activated protein kinase 2
chr4	43971763	43972709	947	*	573	1.34876	7.05838	6.72808e-15	merged_common	212.712	83.5171	Intron (ENSMUST00000030202.13/384009, intron 4 of 4)	4	43983483	43985423	1941	1	442829	ENSMUST00000095107.2	-10774	ENSMUSG00000070999	Ccin	calicin
chr12	35826790	35827555	766	*	366	1.33225	7.06681	6.72808e-15	merged_common	212.738	84.4886	Distal Intergenic	12	35925620	35949736	24117	1	403205	ENSMUST00000042101.4	-98065	ENSMUSG00000036231	Agr3	anterior gradient 3
chr15	83562774	83564611	1838	*	330	1.99202	5.94836	6.77346e-15	merged_common	123.158	30.9603	Promoter	15	83563592	83574203	10612	1	12257	ENSMUST00000047419.7	0	ENSMUSG00000041736	Tspo	translocator protein
chr8	126615782	126616246	465	*	267	2.28054	5.53941	6.99858e-15	ATAC_PL_unique	102.514	21.0996	Distal Intergenic	8	126588296	126593986	5691	2	270110	ENSMUST00000054960.7	-21796	ENSMUSG00000051495	Irf2bp2	interferon regulatory factor 2 binding protein 2
chr2	133020165	133021943	1779	*	470	-1.83687	6.17298	7.01075e-15	merged_common	38.1747	136.373	Distal Intergenic	2	132904389	132945906	41518	2	241639	ENSMUST00000038280.4	-74259	ENSMUSG00000027356	Fermt1	fermitin family member 1
chr16	90676805	90677768	964	*	646	1.84167	6.16237	7.01075e-15	merged_common	135.599	37.832	Exon (ENSMUST00000232154.1/ENSMUST00000232154.1, exon 1 of 3)	16	90721447	90727139	5693	2	66578	ENSMUST00000147546.1	49371	ENSMUSG00000022978	Mis18a	MIS18 kinetochore protein A
chr15	69613890	69614871	982	*	360	-1.63132	6.50167	7.03513e-15	merged_common	51.4825	159.491	Distal Intergenic	15	69270533	69274720	4188	1	75076	ENSMUST00000231164.1	343357	ENSMUSG00000116167	4930504C09Rik	RIKEN cDNA 4930504C09 gene
chr2	103290718	103291545	828	*	154	-1.36702	6.99292	7.06561e-15	merged_common	79.3089	204.567	Promoter	2	103274103	103290937	16835	2	13661	ENSMUST00000140503.7	0	ENSMUSG00000012350	Ehf	ets homologous factor
chr7	120869390	120870982	1593	*	857	-1.40924	6.91684	7.18674e-15	merged_common	74.142	196.919	Intron (ENSMUST00000047875.15/13631, intron 2 of 17)	7	120876220	120880327	4108	1	13631	ENSMUST00000125828.2	-5238	ENSMUSG00000035064	Eef2k	eukaryotic elongation factor-2 kinase
chr5	16317523	16318163	641	*	370	1.70653	6.3965	7.23566e-15	merged_common	152.194	46.6316	Exon (ENSMUST00000167946.8/12293, exon 16 of 39)	5	16325985	16329883	3899	1	12293	ENSMUST00000200158.1	-7822	ENSMUSG00000040118	Cacna2d1	calcium channel, voltage-dependent, alpha2/delta subunit 1
chr2	11331417	11333908	2492	*	2008	0.87314	8.28008	7.31155e-15	merged_common	420.701	229.685	Exon (ENSMUST00000193871.1/ENSMUST00000193871.1, exon 1 of 1)	2	11339488	11344111	4624	1	100503147	ENSMUST00000131188.2	-5580	ENSMUSG00000086006	Gm13293	predicted gene 13293
chr16	36476820	36477418	599	*	282	2.06207	5.83886	7.45384e-15	merged_common	116.962	28.0091	Distal Intergenic	16	36450537	36455392	4856	2	20863	ENSMUST00000068182.2	-21428	ENSMUSG00000054905	Stfa3	stefin A3
chr10	38346927	38347435	509	*	359	-1.35662	7.02492	7.48009e-15	merged_common	81.3804	208.403	Distal Intergenic	10	38175780	38181903	6124	1	75877	ENSMUST00000215643.1	171147	ENSMUSG00000111234	4930591E09Rik	RIKEN cDNA 4930591E09 gene
chr4	128957129	128957966	838	*	469	2.20821	5.63251	7.49195e-15	merged_common	106.641	23.0773	Intron (ENSMUST00000119354.7/242669, intron 2 of 8)	4	128946139	128961398	15260	2	242669	ENSMUST00000147731.1	3432	ENSMUSG00000028789	Azin2	antizyme inhibitor 2
chr19	9954144	9955212	1069	*	542	1.13152	7.54134	7.55518e-15	merged_common	275.728	125.852	Distal Intergenic	19	9982703	9985092	2390	1	14319	ENSMUST00000025563.6	-27491	ENSMUSG00000024661	Fth1	ferritin heavy polypeptide 1
chr19	28363161	28364182	1022	*	596	-1.3065	7.13981	7.56657e-15	merged_common	89.6704	221.791	Intron (ENSMUST00000162022.7/226075, intron 4 of 10)	19	28262347	28326006	63660	2	226075	ENSMUST00000159520.7	-37155	ENSMUSG00000052942	Glis3	GLIS family zinc finger 3
chr8	36951758	36953265	1508	*	694	-1.3065	7.13981	7.56657e-15	merged_common	89.6704	221.791	Promoter	8	36570249	36952442	382194	2	50768	ENSMUST00000163663.2	0	ENSMUSG00000031523	Dlc1	deleted in liver cancer 1
chr6	120145208	120145908	701	*	390	1.53021	6.6785	7.67942e-15	merged_common	174.08	60.2711	Intron (ENSMUST00000112711.8/29862, intron 1 of 3)	6	120193823	120200334	6512	1	29862	ENSMUST00000035244.5	-47915	ENSMUSG00000041377	Ninj2	ninjurin 2
chr10	99485223	99485967	745	*	535	1.77482	6.27103	7.7616e-15	merged_common	142.858	41.7476	Intron (ENSMUST00000219484.1/ENSMUST00000219484.1, intron 2 of 2)	10	99609171	99658134	48964	1	100504202	ENSMUST00000218263.1	-123204	ENSMUSG00000111962	Gm20110	predicted gene, 20110
chr17	35219404	35220295	892	*	450	1.66715	6.46463	7.89874e-15	merged_common	157.391	49.5583	3' UTR	17	35220836	35221657	822	2	18038	ENSMUST00000176748.1	1362	ENSMUSG00000042419	Nfkbil1	nuclear factor of kappa light polypeptide gene enhancer in B cells inhibitor like 1
chr16	26348533	26349643	1111	*	503	-0.83493	8.39605	7.99094e-15	merged_common	252.228	449.917	Distal Intergenic	16	26356642	26371841	15200	2	12737	ENSMUST00000023154.2	22198	ENSMUSG00000022512	Cldn1	claudin 1
chr4	66826903	66829415	2513	*	705	-0.50231	9.83326	8.06733e-15	merged_common	766.48	1085.7	Promoter	4	66827584	66842800	15217	1	21898	ENSMUST00000048096.11	0	ENSMUSG00000039005	Tlr4	toll-like receptor 4
chr5	21479505	21480482	978	*	495	-0.96094	8.00161	8.12926e-15	merged_common	183.691	357.57	3' UTR	5	21434729	21480804	46076	1	330050	ENSMUST00000146056.1	44776	ENSMUSG00000047221	Fam185a	family with sequence similarity 185, member A
chr17	24719419	24720575	1157	*	553	1.06	7.72879	8.32948e-15	merged_common	306.298	146.91	Promoter	17	24719676	24719803	128	2	100306952	ENSMUST00000158630.1	0	ENSMUSG00000089255	Snora78	small nucleolar RNA, H/ACA box 7
chr10	17559708	17560672	965	*	488	-1.48535	6.76178	8.48213e-15	merged_common	64.8532	181.579	Distal Intergenic	10	17723218	17725674	2457	1	17684	ENSMUST00000038107.8	-162546	ENSMUSG00000039910	Cited2	Cbp/p300-interacting transactivator, with Glu/Asp-rich carboxy-terminal domain, 2
chr6	134365984	134367818	1835	*	822	1.22048	7.33389	8.5634e-15	merged_common	246.276	105.687	Intron (ENSMUST00000203352.1/74064, intron 3 of 8)	6	134396318	134438736	42419	1	66813	ENSMUST00000032321.10	-28500	ENSMUSG00000030200	Bcl2l14	BCL2-like 14 (apoptosis facilitator)
chr16	7555854	7556629	776	*	303	-1.58855	6.59112	8.66951e-15	merged_common	55.5935	167.196	Distal Intergenic	16	7352970	7409969	57000	1	268859	ENSMUST00000231031.1	202884	ENSMUSG00000008658	Rbfox1	RNA binding protein, fox-1 homolog (C. elegans) 1
chr18	84804071	84804995	925	*	461	-1.88397	6.07583	8.67776e-15	merged_common	35.1108	129.59	Distal Intergenic	18	84851338	84880401	29064	1	109672	ENSMUST00000160180.7	-46343	ENSMUSG00000024646	Cyb5a	cytochrome b5 type A (microsomal)
chr4	95353325	95354580	1256	*	625	-0.96606	7.98757	8.6798e-15	merged_common	181.59	354.736	Distal Intergenic	4	95557507	95926939	369433	1	75578	ENSMUST00000079223.10	-202927	ENSMUSG00000028573	Fggy	FGGY carbohydrate kinase domain containing
chr7	137609512	137610479	968	*	432	-1.55147	6.65046	8.77214e-15	merged_common	58.6771	171.992	Distal Intergenic	7	137437689	137442169	4481	1	620016	ENSMUST00000211598.1	171823	ENSMUSG00000100863	Gm12669	glutaredoxin 3 pseudogene
chr17	64592282	64592989	708	*	272	2.45981	5.32866	8.77883e-15	ATAC_PL_unique	94.2594	17.1336	Distal Intergenic	17	64600736	64755110	154375	1	17158	ENSMUST00000086723.9	-7747	ENSMUSG00000024085	Man2a1	mannosidase 2, alpha 1
chr7	118282849	118283745	897	*	545	-1.64571	6.45006	8.85219e-15	merged_common	49.4262	154.656	Distal Intergenic	7	118243865	118245551	1687	1	67745	ENSMUST00000138180.1	38984	ENSMUSG00000055159	4930583K01Rik	RIKEN cDNA 4930583K01 gene
chr15	50697710	50698501	792	*	166	1.72838	6.34576	8.92349e-15	merged_common	148.051	44.6804	Intron (ENSMUST00000165201.8/83925, intron 4 of 5)	15	50819499	50827521	8023	2	83925	ENSMUST00000183421.1	129020	ENSMUSG00000038679	Trps1	transcriptional repressor GATA binding 1
chr10	8240174	8241184	1011	*	446	1.35391	7.02726	9.20826e-15	merged_common	208.545	81.5891	Intron (ENSMUST00000219116.1/338362, intron 6 of 6)	10	8204756	8302242	97487	2	338362	ENSMUST00000219116.1	61058	ENSMUSG00000047712	Ust	uronyl-2-sulfotransferase
chr3	95653356	95654054	699	*	433	1.92029	6.04373	9.23811e-15	merged_common	128.344	33.9087	Distal Intergenic	3	95658788	95663176	4389	1	17210	ENSMUST00000037947.14	-4734	ENSMUSG00000038612	Mcl1	myeloid cell leukemia sequence 1
chr7	127008222	127009383	1162	*	705	1.80162	6.21523	9.28267e-15	merged_common	138.721	39.7924	Intron (ENSMUST00000165096.8/78388, intron 1 of 14)	7	126998542	127011865	13324	2	78388	ENSMUST00000133172.1	2482	ENSMUSG00000030681	Mvp	major vault protein
chr1	23418872	23419693	822	*	337	-1.09996	7.59805	9.51362e-15	merged_common	132.337	283.662	Distal Intergenic	1	23370268	23397541	27274	2	70155	ENSMUST00000188677.1	-21331	ENSMUSG00000026158	Ogfrl1	opioid growth factor receptor-like 1
chr17	35051218	35052682	1465	*	610	1.00217	7.86791	9.52415e-15	merged_common	330.612	165.058	Promoter	17	35052450	35055741	3292	1	114584	ENSMUST00000172599.1	0	ENSMUSG00000007041	Clic1	chloride intracellular channel 1
chr7	128003626	128004056	431	*	122	2.40979	5.38492	9.64452e-15	ATAC_PL_unique	96.3234	18.1265	Promoter	7	128003949	128011033	7085	1	434246	ENSMUST00000106248.7	0	ENSMUSG00000042828	Trim72	tripartite motif-containing 72
chr1	173741644	173742915	1272	*	819	1.32518	7.06335	9.65038e-15	merged_common	211.709	84.493	Promoter	1	173723427	173741747	18321	2	226691	ENSMUST00000042610.14	0	ENSMUSG00000073490	Ifi207	interferon activated gene 207
chr4	152072049	152072975	927	*	417	-1.32878	7.06496	9.65038e-15	merged_common	84.4819	212.21	Promoter	4	152072498	152115390	42893	1	269608	ENSMUST00000105662.7	0	ENSMUSG00000039713	Plekhg5	pleckstrin homology domain containing, family G (with RhoGef domain) member 5
chr7	88276687	88280258	3572	*	1263	-0.54264	9.6106	9.70385e-15	merged_common	647.744	943.527	Promoter	7	88278085	88310888	32804	1	13032	ENSMUST00000032779.11	0	ENSMUSG00000030560	Ctsc	cathepsin C
chr15	66824039	66825752	1714	*	723	-1.59877	6.5693	9.84118e-15	merged_common	54.5654	165.27	Intron (ENSMUST00000065916.13/21819, intron 41 of 47)	15	66780819	66831646	50828	2	20491	ENSMUST00000164163.7	5894	ENSMUSG00000022372	Sla	src-like adaptor
chr6	108536522	108537409	888	*	633	1.01965	7.81707	9.96801e-15	merged_common	321.104	158.38	Intron (ENSMUST00000032192.8/16438, intron 60 of 61)	6	108518732	108519672	941	1	16438	ENSMUST00000205005.1	17790	ENSMUSG00000030102	Itpr1	inositol 1,4,5-trisphosphate receptor 1
chr11	98773607	98774449	843	*	410	0.90747	8.15331	1.02911e-14	merged_common	389.923	207.875	Promoter	11	98767932	98775333	7402	2	217166	ENSMUST00000064941.6	884	ENSMUSG00000020889	Nr1d1	nuclear receptor subfamily 1, group D, member 1
chr14	47735106	47736283	1178	*	495	-0.84755	8.34687	1.0372e-14	merged_common	242.711	436.744	3' UTR	14	47729659	47736561	6903	1	16709	ENSMUST00000190857.1	5447	ENSMUSG00000021843	Ktn1	kinectin 1
chr3	142353066	142353578	513	*	292	-1.61366	6.49265	1.06532e-14	merged_common	51.4757	157.53	Intron (ENSMUST00000029941.15/56376, intron 2 of 12)	3	142242680	142391808	149129	2	56376	ENSMUST00000195975.4	38230	ENSMUSG00000028273	Pdlim5	PDZ and LIM domain 5
chr7	90201842	90203570	1729	*	424	1.97999	5.94247	1.08199e-14	ATAC_PL_unique	122.146	30.963	Exon (ENSMUST00000207847.1/ENSMUST00000207847.1, exon 1 of 1)	7	90195232	90197006	1775	1	233489	ENSMUST00000208127.1	6610	ENSMUSG00000039361	Picalm	phosphatidylinositol binding clathrin assembly protein
chr18	5123238	5124188	951	*	282	1.47287	6.78297	1.08418e-14	merged_common	183.471	66.098	Distal Intergenic	18	5114253	5119218	4966	1	225115	ENSMUST00000129543.1	8985	ENSMUSG00000024236	Svil	supervillin
chr2	167492250	167493518	1269	*	714	1.14276	7.50235	1.08817e-14	merged_common	269.423	122.02	Promoter	2	167481133	167492887	11755	2	263876	ENSMUST00000057627.15	0	ENSMUSG00000047030	Spata2	spermatogenesis associated 2
chr1	173422820	173423521	702	*	236	1.75193	6.29307	1.08997e-14	merged_common	143.911	42.7279	Intron (ENSMUST00000147604.7/383619, intron 4 of 11)	1	173420598	173459719	39122	1	383619	ENSMUST00000173023.1	2222	ENSMUSG00000037860	Aim2	absent in melanoma 2
chr1	152901832	152904063	2232	*	1365	0.82207	8.42805	1.09166e-14	merged_common	457.962	259.037	Promoter	1	152836995	152902622	65628	2	226517	ENSMUST00000073441.12	0	ENSMUSG00000042772	Smg7	Smg-7 homolog, nonsense mediated mRNA decay factor (C. elegans)
chr12	80853370	80853470	101	*	73	1.49628	6.72972	1.12213e-14	ATAC_PL_unique	178.263	63.1881	Intron (ENSMUST00000220238.1/217684, intron 3 of 6)	12	80790559	80880835	90277	1	217684	ENSMUST00000068519.6	62811	ENSMUSG00000021133	Susd6	sushi domain containing 6
chr3	106784886	106785654	769	*	381	2.00194	5.90689	1.128e-14	ATAC_PL_unique	120.081	29.9798	Intron (ENSMUST00000038845.9/12508, intron 1 of 7)	3	106759921	106790149	30229	2	12508	ENSMUST00000038845.9	4495	ENSMUSG00000040747	Cd53	CD53 antigen
chr11	82087793	82088396	604	*	332	2.00194	5.90689	1.128e-14	merged_common	120.081	29.9798	Distal Intergenic	11	82101845	82103400	1556	1	20293	ENSMUST00000000194.3	-13449	ENSMUSG00000035352	Ccl12	chemokine (C-C motif) ligand 12
chr9	105611727	105612822	1096	*	844	-1.53438	6.66693	1.14207e-14	merged_common	59.7034	172.939	Distal Intergenic	9	105642978	105679320	36343	1	75669	ENSMUST00000187573.6	-30156	ENSMUSG00000032571	Pik3r4	phosphoinositide-3-kinase regulatory subunit 4
chr19	10040915	10041070	156	*	87	2.02505	5.87031	1.16872e-14	ATAC_PL_unique	118.016	28.9961	Promoter	19	10041548	10059671	18124	1	60527	ENSMUST00000115995.2	-478	ENSMUSG00000024664	Fads3	fatty acid desaturase 3
chr10	45764870	45765683	814	*	553	-2.02427	5.87031	1.16872e-14	merged_common	29.0039	117.984	Distal Intergenic	10	45807704	45852018	44315	1	320363	ENSMUST00000213245.1	-42021	ENSMUSG00000110874	D030045P18Rik	RIKEN cDNA D030045P18 gene
chr5	118404306	118404875	570	*	284	1.65768	6.45999	1.19817e-14	merged_common	156.371	49.5616	Distal Intergenic	5	118560679	118720114	159436	1	76199	ENSMUST00000201614.1	-155804	ENSMUSG00000018076	Med13l	mediator complex subunit 13-like
chr2	151895710	151896468	759	*	471	-2.05183	5.83267	1.2029e-14	merged_common	27.9884	116.049	Distal Intergenic	2	151911210	151945337	34128	1	11602	ENSMUST00000028955.5	-14742	ENSMUSG00000027460	Angpt4	angiopoietin 4
chr7	106810063	106810752	690	*	245	2.04942	5.83267	1.2029e-14	merged_common	115.952	28.0117	Exon (ENSMUST00000209339.1/ENSMUST00000209339.1, exon 2 of 2)	7	106814129	106819147	5019	1	66786	ENSMUST00000166880.2	-3377	ENSMUSG00000036744	Olfr701	olfactory receptor 701
chr2	157366664	157367208	545	*	408	1.50168	6.71011	1.28897e-14	merged_common	176.185	62.2184	Promoter	2	157367594	157396763	29170	1	69161	ENSMUST00000081202.5	-386	ENSMUSG00000063019	Manbal	mannosidase, beta A, lysosomal-like
chr7	46543997	46544874	878	*	307	-1.54334	6.6463	1.30633e-14	merged_common	58.6732	171.014	Intron (ENSMUST00000033127.11/27414, intron 9 of 10)	7	46443221	46603242	160022	2	27414	ENSMUST00000156147.7	58368	ENSMUSG00000030839	Sergef	secretion regulating guanine nucleotide exchange factor
chr7	30953132	30954219	1088	*	566	-0.82887	8.39295	1.31239e-14	merged_common	252.216	448.009	Intron (ENSMUST00000058860.13/22282, intron 7 of 9)	7	30946751	30955450	8700	2	22282	ENSMUST00000169496.7	1231	ENSMUSG00000058239	Usf2	upstream transcription factor 2
chr15	93245281	93246445	1165	*	505	0.90764	8.13354	1.31691e-14	merged_common	384.639	205.034	3' UTR	15	93244455	93275151	30697	2	223827	ENSMUST00000057896.4	28706	ENSMUSG00000036197	Gxylt1	glucoside xylosyltransferase 1
chrX	164979625	164981010	1386	*	904	-0.63836	9.13686	1.31756e-14	merged_common	451.218	702.347	Promoter	20	164980592	164997269	16678	1	237211	ENSMUST00000101082.10	0	ENSMUSG00000047757	Fancb	Fanconi anemia, complementation group B
chr2	167358608	167359023	416	*	215	2.49814	5.26178	1.3361e-14	ATAC_PL_unique	91.1929	16.1416	Distal Intergenic	2	167298444	167349183	50740	2	56336	ENSMUST00000109221.8	-9425	ENSMUSG00000017929	B4galt5	UDP-Gal:betaGlcNAc beta 1,4-galactosyltransferase, polypeptide 5
chr12	52396034	52396957	924	*	505	-1.00844	7.85019	1.34598e-14	merged_common	162.689	327.286	Distal Intergenic	12	52475739	52480609	4871	2	102638611	ENSMUST00000219885.1	83652	ENSMUSG00000111982	Gm35135	predicted gene, 35135
chr10	95264211	95265623	1413	*	815	1.2644	7.20363	1.35851e-14	merged_common	228.465	95.1037	Intron (ENSMUST00000220279.1/12905, intron 1 of 1)	10	95174746	95322965	148220	2	12905	ENSMUST00000220279.1	57342	ENSMUSG00000045867	Cradd	CASP2 and RIPK1 domain containing adaptor with death domain
chr6	124375171	124375265	95	*	63	-1.69683	6.35065	1.36858e-14	ATAC_PP_unique	45.325	146.938	Distal Intergenic	6	124363301	124364519	1219	2	72268	ENSMUST00000203901.1	-10652	NA	1700027F06Rik	RIKEN cDNA 1700027F06 gene
chr11	69062140	69063371	1232	*	802	1.41548	6.87603	1.41109e-14	merged_common	191.841	71.9185	Distal Intergenic	11	69059717	69061578	1862	1	71923	ENSMUST00000051888.3	2423	ENSMUSG00000045176	Borcs6	BLOC-1 related complex subunit 6
chr1	52652709	52653778	1070	*	765	1.59428	6.51127	1.42732e-14	merged_common	158.508	52.4958	Downstream (2-3kb)	1	52645181	52650027	4847	1	227094	ENSMUST00000191076.1	7528	ENSMUSG00000043015	Nemp2	nuclear envelope integral membrane protein 2
chr15	66742393	66743138	746	*	374	1.79091	6.20998	1.44167e-14	merged_common	137.705	39.7953	Intron (ENSMUST00000065916.13/21819, intron 34 of 47)	15	66736250	66850721	114472	1	21819	ENSMUST00000172153.1	6143	ENSMUSG00000053469	Tg	thyroglobulin
chr2	9926122	9926868	747	*	177	-1.78177	6.22043	1.44167e-14	merged_common	40.2117	138.267	Intron (ENSMUST00000026888.10/209361, intron 4 of 6)	2	9916076	9918834	2759	2	209361	ENSMUST00000114906.1	-7288	ENSMUSG00000025782	Taf3	TATA-box binding protein associated factor 3
chr3	103733025	103735621	2597	*	1951	-1.12975	7.5189	1.46112e-14	merged_common	123.985	271.306	3' UTR	3	103733700	103737968	4269	2	99543	ENSMUST00000154145.1	2347	ENSMUSG00000027848	Olfml3	olfactomedin-like 3
chr11	96075165	96076248	1084	*	732	0.70754	8.8413	1.47496e-14	merged_common	586.127	358.923	Promoter	11	96068852	96075670	6819	2	11951	ENSMUST00000090541.11	0	ENSMUSG00000006057	Atp5g1	ATP synthase, H+ transporting, mitochondrial F0 complex, subunit C1 (subunit 9)
chr10	37978816	37979934	1119	*	260	-0.79271	8.51882	1.48156e-14	merged_common	278.68	482.764	Distal Intergenic	10	38175780	38181903	6124	1	75877	ENSMUST00000215643.1	-195846	ENSMUSG00000111234	4930591E09Rik	RIKEN cDNA 4930591E09 gene
chr17	63042925	63044303	1379	*	574	-0.75291	8.66474	1.52417e-14	merged_common	312.624	526.83	Distal Intergenic	17	62604184	62881317	277134	2	13640	ENSMUST00000076840.11	-161608	ENSMUSG00000048915	Efna5	ephrin A5
chr16	55754319	55754926	608	*	346	1.9275	6.00509	1.55134e-14	merged_common	125.265	32.9302	Distal Intergenic	16	55811375	55822138	10764	2	80859	ENSMUST00000114458.7	67212	ENSMUSG00000035356	Nfkbiz	nuclear factor of kappa light polypeptide gene enhancer in B cells inhibitor, zeta
chr3	142590182	142591060	879	*	705	-0.9924	7.87885	1.59757e-14	merged_common	166.878	332.002	Distal Intergenic	3	142594847	142619179	24333	1	14468	ENSMUST00000029936.4	-3787	ENSMUSG00000040264	Gbp2b	guanylate binding protein 2b
chr2	167334836	167335602	767	*	427	1.26582	7.18969	1.60057e-14	merged_common	226.38	94.1429	Intron (ENSMUST00000109221.8/56336, intron 1 of 8)	2	167298444	167349183	50740	2	56336	ENSMUST00000109221.8	13581	ENSMUSG00000017929	B4galt5	UDP-Gal:betaGlcNAc beta 1,4-galactosyltransferase, polypeptide 5
chr2	35449654	35450387	734	*	251	-1.32688	7.04613	1.61977e-14	merged_common	83.4413	209.321	Intron (ENSMUST00000113002.8/14594, intron 1 of 7)	2	35423329	35445833	22505	2	14594	ENSMUST00000130913.7	-3821	ENSMUSG00000035778	Ggta1	glycoprotein galactosyltransferase alpha 1, 3
chr11	93994974	93997070	2097	*	596	0.95554	7.97215	1.62016e-14	merged_common	349.687	180.316	Promoter	11	93996091	94043628	47538	1	70834	ENSMUST00000132772.7	0	ENSMUSG00000020859	Spag9	sperm associated antigen 9
chr18	39248918	39249356	439	*	279	-2.40582	5.36226	1.62434e-14	ATAC_PP_unique	17.8685	94.692	Intron (ENSMUST00000097593.8/71302, intron 17 of 22)	18	39227368	39372511	145144	1	71302	ENSMUST00000154551.7	21550	ENSMUSG00000036452	Arhgap26	Rho GTPase activating protein 26
chr4	136123486	136123706	221	*	88	3.43781	4.33621	1.65424e-14	ATAC_PL_unique	66.4923	6.13603	Distal Intergenic	4	136143497	136145392	1896	1	15903	ENSMUST00000008016.2	-19791	ENSMUSG00000007872	Id3	inhibitor of DNA binding 3
chr5	45925776	45926767	992	*	464	-1.72512	6.29809	1.67867e-14	merged_common	43.277	143.077	Downstream (<1kb)	5	45926818	45932409	5592	2	78106	ENSMUST00000198088.1	5642	ENSMUSG00000106602	4930405L22Rik	RIKEN cDNA 4930405L22 gene
chr14	117624918	117626138	1221	*	639	-0.95385	7.98968	1.68379e-14	merged_common	182.627	353.755	Exon (ENSMUST00000123239.1/23888, exon 4 of 4)	14	117953743	117953847	105	2	102465148	ENSMUST00000183564.1	327709	ENSMUSG00000098648	Mir6239	microRNA 6239
chr4	122838129	122838988	860	*	451	1.68689	6.38688	1.68593e-14	merged_common	150.157	46.638	Intron (ENSMUST00000030412.10/19063, intron 1 of 8)	4	122836254	122850259	14006	1	19063	ENSMUST00000097902.4	1875	ENSMUSG00000028657	Ppt1	palmitoyl-protein thioesterase 1
chr14	54426156	54427433	1278	*	618	1.08477	7.61373	1.70994e-14	merged_common	285.256	134.489	Promoter	14	54426909	54429756	2848	1	68836	ENSMUST00000010550.11	0	ENSMUSG00000010406	Mrpl52	mitochondrial ribosomal protein L52
chr3	27584382	27585123	742	*	322	1.81968	6.1516	1.71042e-14	merged_common	133.569	37.8379	Promoter	3	27584900	27584995	96	2	100526525	ENSMUST00000174954.1	0	ENSMUSG00000092695	Mir3092	microRNA 3092
chr1	148893124	148894025	902	*	620	-1.81611	6.16237	1.71042e-14	merged_common	38.1686	134.403	Distal Intergenic	1	149886184	149902199	16016	2	18783	ENSMUST00000155438.1	1008174	ENSMUSG00000056220	Pla2g4a	phospholipase A2, group IVA (cytosolic, calcium-dependent)
chr11	61174272	61175654	1383	*	963	0.62767	9.17429	1.71388e-14	merged_common	718.142	464.796	Promoter	11	61151785	61175055	23271	2	216825	ENSMUST00000041683.8	0	ENSMUSG00000042506	Usp22	ubiquitin specific peptidase 22
chr4	57031118	57031782	665	*	516	2.60437	5.12515	1.74287e-14	ATAC_PL_unique	86.0638	14.1523	Intron (ENSMUST00000095076.9/54357, intron 18 of 25)	4	56995678	57027676	31999	2	54357	ENSMUST00000044022.4	-3442	ENSMUSG00000028434	Epb41l4b	erythrocyte membrane protein band 4.1 like 4b
chr5	123831925	123832750	826	*	442	2.34855	5.43132	1.74522e-14	ATAC_PL_unique	97.3828	19.1205	Distal Intergenic	5	123819547	123821592	2046	1	208628	ENSMUST00000197002.1	12378	ENSMUSG00000029414	Kntc1	kinetochore associated 1
chr10	80147200	80153605	6406	*	2263	0.76793	8.60195	1.75418e-14	merged_common	507.026	297.756	Promoter	10	80148272	80158367	10096	1	59090	ENSMUST00000099492.9	0	ENSMUSG00000035621	Midn	midnolin
chr17	55749825	55750289	465	*	144	-1.98624	5.90085	1.8048e-14	merged_common	30.0175	118.93	Promoter	17	55749984	55853662	103679	1	52614	ENSMUST00000025004.6	0	ENSMUSG00000032915	Adgre4	adhesion G protein-coupled receptor E4
chr9	77736885	77738499	1615	*	642	-0.76577	8.60602	1.87796e-14	merged_common	298.82	508.078	Distal Intergenic	9	77754535	77794485	39951	1	14629	ENSMUST00000034905.8	-16036	ENSMUSG00000032350	Gclc	glutamate-cysteine ligase, catalytic subunit
chr11	120347889	120349384	1496	*	731	1.10979	7.55244	1.89172e-14	merged_common	275.773	127.782	Promoter	11	120345690	120348542	2853	2	11465	ENSMUST00000071555.12	0	ENSMUSG00000062825	Actg1	actin, gamma, cytoplasmic 1
chr4	88414405	88415674	1270	*	921	-1.61145	6.52014	1.90012e-14	merged_common	52.5062	160.437	Intron (ENSMUST00000132493.7/66775, intron 6 of 6)	4	88400565	88411011	10447	1	230393	ENSMUST00000107147.1	13840	ENSMUSG00000038368	Focad	focadhesin
chr1	3292239	3293379	1141	*	528	-1.61145	6.52014	1.90012e-14	merged_common	52.5062	160.437	Intron (ENSMUST00000070533.4/497097, intron 2 of 2)	1	3214482	3671498	457017	2	497097	ENSMUST00000070533.4	378119	ENSMUSG00000051951	Xkr4	X-linked Kx blood group related 4
chr18	65693158	65694003	846	*	427	1.25781	7.20041	1.9179e-14	merged_common	227.436	95.1087	Distal Intergenic	18	65698268	65751537	53270	1	319888	ENSMUST00000115097.7	-4265	ENSMUSG00000046610	Oacyl	O-acyltransferase like
chr17	16950887	16951938	1052	*	521	-0.63046	9.14647	1.93584e-14	merged_common	455.479	705.108	Exon (ENSMUST00000190415.1/ENSMUST00000190415.1, exon 1 of 3)	17	17064113	17089628	25516	1	449000	ENSMUST00000127027.1	-112175	ENSMUSG00000096696	Zfp960	zinc finger protein 960
chr2	30258507	30259113	607	*	254	2.03667	5.82642	1.938e-14	merged_common	114.941	28.0142	Intron (ENSMUST00000113654.7/241296, intron 2 of 2)	2	30266203	30282148	15946	1	227696	ENSMUST00000154647.7	-7090	ENSMUSG00000079484	Phyhd1	phytanoyl-CoA dioxygenase domain containing 1
chr3	85604230	85605117	888	*	371	-1.23609	7.24737	1.96161e-14	merged_common	98.9978	233.199	Exon (ENSMUST00000107672.7/229487, exon 4 of 12)	3	85574195	85654158	79964	1	229487	ENSMUST00000029726.5	30035	ENSMUSG00000028085	Gatb	glutamyl-tRNA(Gln) amidotransferase, subunit B
chr1	34389067	34390160	1094	*	778	-1.1888	7.34001	1.96878e-14	merged_common	107.308	244.622	Distal Intergenic	1	34433121	34433199	79	2	100628580	ENSMUST00000175111.1	43039	ENSMUSG00000092852	Mir5103	microRNA 5103
chr11	106216052	106217458	1407	*	423	0.88933	8.18969	1.97176e-14	merged_common	397.374	214.528	Promoter	11	106197408	106216344	18937	2	67163	ENSMUST00000002043.9	0	ENSMUSG00000078622	Ccdc47	coiled-coil domain containing 47
chr1	189170915	189171613	699	*	319	-1.31564	7.05825	1.97747e-14	merged_common	84.4737	210.266	Distal Intergenic	1	189210025	189215217	5193	2	16526	ENSMUST00000193686.1	43604	ENSMUSG00000037624	Kcnk2	potassium channel, subfamily K, member 2
chr1	174353370	174353486	117	*	55	-1.84247	6.09615	2.0007e-14	ATAC_PP_unique	36.1247	129.552	Distal Intergenic	1	174368919	174369848	930	1	258238	ENSMUST00000085862.1	-15433	ENSMUSG00000066672	Olfr417	olfactory receptor 417
chr2	26482829	26484140	1312	*	578	0.85855	8.27293	2.03581e-14	merged_common	416.509	229.708	Intron (ENSMUST00000028288.4/18128, intron 4 of 33)	2	26469825	26470498	674	2	18128	ENSMUST00000129506.1	-12331	ENSMUSG00000026923	Notch1	notch 1
chr14	17878411	17879307	897	*	271	-1.75551	6.24342	2.03766e-14	merged_common	41.2312	139.215	Intron (ENSMUST00000224470.1/21834, intron 2 of 3)	14	17962821	18011261	48441	1	21834	ENSMUST00000224934.1	-83514	ENSMUSG00000021779	Thrb	thyroid hormone receptor beta
chr1	166259368	166259977	610	*	336	-1.75551	6.24342	2.03766e-14	merged_common	41.2312	139.215	Intron (ENSMUST00000111416.6/100039795, intron 1 of 9)	1	166254193	166311270	57078	1	100039795	ENSMUST00000195557.5	5175	ENSMUSG00000040612	Ildr2	immunoglobulin-like domain containing receptor 2
chr2	116923255	116923658	404	*	135	1.65741	6.43132	2.04097e-14	merged_common	153.28	48.5909	Distal Intergenic	2	116900194	116904557	4364	1	320975	ENSMUST00000155323.1	23061	ENSMUSG00000085316	D330050G23Rik	RIKEN cDNA D330050G23 gene
chr4	33347064	33347455	392	*	155	2.11775	5.70602	2.04303e-14	merged_common	108.752	25.0571	Intron (ENSMUST00000108153.8/24018, intron 8 of 15)	4	33331014	33358056	27043	1	24018	ENSMUST00000146870.1	16050	ENSMUSG00000028274	Rngtt	RNA guanylyltransferase and 5'-phosphatase
chr11	86624029	86624880	852	*	431	2.11775	5.70602	2.04303e-14	merged_common	108.752	25.0571	Intron (ENSMUST00000018315.9/75909, intron 7 of 11)	11	86585272	86602295	17024	2	75909	ENSMUST00000153971.1	-21734	ENSMUSG00000018171	Vmp1	vacuole membrane protein 1
chr6	42360179	42363483	3305	*	1929	2.14811	5.66321	2.04468e-14	ATAC_PL_unique	106.689	24.0698	3' UTR	6	42355137	42356261	1125	1	22793	ENSMUST00000204480.1	5042	ENSMUSG00000029860	Zyx	zyxin
chr11	69681621	69682260	640	*	380	1.40766	6.87221	2.05249e-14	merged_common	190.816	71.9229	Promoter	11	69673115	69681846	8732	2	80886	ENSMUST00000005336.8	0	ENSMUSG00000005204	Senp3	SUMO/sentrin specific peptidase 3
chr10	8758828	8759855	1028	*	561	-0.89962	8.14205	2.07494e-14	merged_common	206.821	385.84	Intron (ENSMUST00000015449.5/70097, intron 8 of 19)	10	8744599	8756761	12163	2	70097	ENSMUST00000212869.1	-2067	ENSMUSG00000015305	Sash1	SAM and SH3 domain containing 1
chr16	84582773	84584631	1859	*	792	0.67564	8.95174	2.10737e-14	merged_common	625.801	391.785	Distal Intergenic	16	84703167	84715245	12079	1	100653389	ENSMUST00000185662.6	-118536	ENSMUSG00000097418	Mir155hg	Mir155 host gene (non-protein coding)
chr1	156615348	156616416	1069	*	476	0.9711	7.93345	2.19466e-14	merged_common	342.272	174.599	Promoter	1	156615923	156629993	14071	1	11352	ENSMUST00000190749.1	0	ENSMUSG00000026596	Abl2	v-abl Abelson murine leukemia viral oncogene 2 (arg, Abelson-related gene)
chr3	65872974	65873786	813	*	332	1.78011	6.2047	2.23539e-14	merged_common	136.689	39.7986	Distal Intergenic	3	65946782	65947998	1217	2	56706	ENSMUST00000149729.1	74212	ENSMUSG00000027829	Ccnl1	cyclin L1
chr10	82860052	82861189	1138	*	598	1.07501	7.62928	2.23833e-14	merged_common	287.374	136.407	Promoter	10	82860301	82897710	37410	1	50493	ENSMUST00000219442.1	0	ENSMUSG00000020250	Txnrd1	thioredoxin reductase 1
chr13	40971294	40971630	337	*	237	2.89961	4.79436	2.28825e-14	ATAC_PL_unique	75.802	10.1581	Intron (ENSMUST00000153685.1/102633880, intron 1 of 4)	13	40953415	40958228	4814	1	14538	ENSMUST00000225996.1	17879	ENSMUSG00000021360	Gcnt2	glucosaminyl (N-acetyl) transferase 2, I-branching enzyme
chr5	92343883	92346445	2563	*	1270	1.89708	6.03237	2.30312e-14	merged_common	126.317	33.9145	Exon (ENSMUST00000135528.7/109979, exon 3 of 3)	5	92346638	92348882	2245	2	15945	ENSMUST00000038816.12	2437	ENSMUSG00000034855	Cxcl10	chemokine (C-X-C motif) ligand 10
chr18	53263916	53267234	3319	*	402	1.37862	6.93335	2.34061e-14	merged_common	197.083	75.7955	Intron (ENSMUST00000165032.7/69226, intron 1 of 6)	18	53245769	53390823	145055	1	69226	ENSMUST00000025417.8	18147	ENSMUSG00000024535	Snx24	sorting nexing 24
chr9	64925458	64927227	1770	*	450	1.47944	6.72147	2.44494e-14	merged_common	176.215	63.1955	Exon (ENSMUST00000037798.7/214111, exon 8 of 10)	9	64912483	64919108	6626	1	102442	ENSMUST00000217307.1	12975	ENSMUSG00000053641	Dennd4a	DENN/MADD domain containing 4A
chr18	54846027	54847880	1854	*	1018	-0.55308	9.50873	2.46148e-14	merged_common	601.404	882.388	Distal Intergenic	18	54888045	54990180	102136	2	269023	ENSMUST00000064763.5	142300	ENSMUSG00000052713	Zfp608	zinc finger protein 608
chr7	88201695	88202451	757	*	434	-0.94555	7.99374	2.46162e-14	merged_common	183.669	353.733	Distal Intergenic	7	88278085	88310888	32804	1	13032	ENSMUST00000032779.11	-75634	ENSMUSG00000030560	Ctsc	cathepsin C
chr10	58354404	58355140	737	*	426	-1.30671	7.08879	2.48597e-14	merged_common	86.5484	214.101	Intron (ENSMUST00000020078.13/110829, intron 1 of 9)	10	58323466	58424691	101226	1	110829	ENSMUST00000020078.13	30938	ENSMUSG00000019920	Lims1	LIM and senescent cell antigen-like domains 1
chr11	86756931	86758496	1566	*	986	0.88924	8.17042	2.53068e-14	merged_common	392.09	211.689	Promoter	11	86694351	86757565	63215	2	67300	ENSMUST00000103186.10	0	ENSMUSG00000047126	Cltc	clathrin, heavy polypeptide (Hc)
chr1	36753913	36754973	1061	*	526	-1.55362	6.59984	2.54002e-14	merged_common	56.6118	166.185	Intron (ENSMUST00000208994.1/71166, intron 8 of 8)	1	36761798	36782818	21021	1	22637	ENSMUST00000027291.6	-6825	ENSMUSG00000026117	Zap70	zeta-chain (TCR) associated protein kinase
chr1	131188462	131189115	654	*	322	1.53125	6.60777	2.54002e-14	merged_common	165.811	57.3668	Intron (ENSMUST00000068564.14/54354, intron 1 of 4)	1	131176410	131200135	23726	2	54354	ENSMUST00000068564.14	11020	ENSMUSG00000026430	Rassf5	Ras association (RalGDS/AF-6) domain family member 5
chr10	9896588	9897427	840	*	570	-0.94013	8.01561	2.54232e-14	merged_common	186.825	358.462	Intron (ENSMUST00000038213.13/78808, intron 2 of 27)	10	9755547	9900683	145137	2	78808	ENSMUST00000038213.13	3256	ENSMUSG00000019790	Stxbp5	syntaxin binding protein 5 (tomosyn)
chr16	10975934	10976993	1060	*	356	1.04824	7.69468	2.55123e-14	merged_common	297.924	144.063	Promoter	16	10960824	10975579	14756	2	56722	ENSMUST00000117360.7	-355	ENSMUSG00000022500	Litaf	LPS-induced TN factor
chr17	56023160	56024049	890	*	432	1.39626	6.88585	2.56122e-14	merged_common	191.869	72.8936	Intron (ENSMUST00000003268.10/20405, intron 1 of 9)	17	56011943	56015120	3178	1	68047	ENSMUST00000159420.1	11217	ENSMUSG00000003199	Mpnd	MPN domain containing
chr11	55453197	55454018	822	*	643	1.73118	6.28291	2.58118e-14	merged_common	141.877	42.7342	Intron (ENSMUST00000108857.1/11927, intron 2 of 3)	11	55446644	55461197	14554	2	11927	ENSMUST00000138412.1	7179	ENSMUSG00000018585	Atox1	antioxidant 1 copper chaperone
chr2	144188052	144188636	585	*	171	1.93516	5.96537	2.60355e-14	merged_common	122.187	31.951	Promoter	2	144173150	144189290	16141	2	433481	ENSMUST00000099292.8	654	ENSMUSG00000074758	Gm5535	predicted gene 5535
chr7	100991985	100992449	465	*	163	3.24165	4.45794	2.6269e-14	ATAC_PL_unique	67.5913	7.1459	Distal Intergenic	7	100996732	101003887	7156	2	18442	ENSMUST00000208340.1	11438	ENSMUSG00000032860	P2ry2	purinergic receptor P2Y, G-protein coupled 2
chr2	167963182	167964241	1060	*	761	2.37909	5.36989	2.73119e-14	ATAC_PL_unique	94.3163	18.1305	Exon (ENSMUST00000147210.7/19246, exon 2 of 7)	2	167951048	167965067	14020	1	19246	ENSMUST00000142717.1	12134	ENSMUSG00000027540	Ptpn1	protein tyrosine phosphatase, non-receptor type 1
chr11	118270272	118270652	381	*	171	2.37909	5.36989	2.73119e-14	ATAC_PL_unique	94.3163	18.1305	Intron (ENSMUST00000106296.8/72344, intron 13 of 20)	11	118259654	118266048	6395	2	72344	ENSMUST00000141647.7	-4224	ENSMUSG00000033909	Usp36	ubiquitin specific peptidase 36
chr15	25320579	25323157	2579	*	1268	-0.59151	9.31743	2.79044e-14	merged_common	519.75	783.172	Intron (ENSMUST00000226199.1/ENSMUST00000226199.1, intron 1 of 4)	15	25364857	25413698	48842	2	70350	ENSMUST00000228597.1	90541	ENSMUSG00000045763	Basp1	brain abundant, membrane attached signal protein 1
chr8	45366828	45367840	1013	*	535	-0.83502	8.34047	2.81665e-14	merged_common	242.688	432.927	Intron (ENSMUST00000093526.12/212326, intron 1 of 13)	8	45336717	45358865	22149	2	212326	ENSMUST00000135912.7	-7963	ENSMUSG00000070044	Fam149a	family with sequence similarity 149, member A
chr2	66157854	66159050	1197	*	855	-1.73006	6.26593	2.85393e-14	merged_common	42.2506	140.163	Intron (ENSMUST00000188152.1/ENSMUST00000188152.1, intron 1 of 1)	2	66082766	66124994	42229	2	14425	ENSMUST00000028378.3	-32860	ENSMUSG00000026994	Galnt3	polypeptide N-acetylgalactosaminyltransferase 3
chr2	181483347	181484173	827	*	337	1.68729	6.35669	2.87104e-14	merged_common	147.068	45.6659	Distal Intergenic	2	181493206	181494980	1775	1	241850	ENSMUST00000069649.8	-9033	ENSMUSG00000055882	Abhd16b	abhydrolase domain containing 16B
chr9	104972634	104973520	887	*	352	-1.1328	7.47091	2.89799e-14	merged_common	119.802	262.707	Intron (ENSMUST00000057742.14/74020, intron 7 of 15)	9	105053239	105076472	23234	1	94062	ENSMUST00000149243.7	-79719	ENSMUSG00000032563	Mrpl3	mitochondrial ribosomal protein L3
chr11	68864628	68865241	614	*	349	2.8028	4.88161	2.95004e-14	ATAC_PL_unique	77.8708	11.1596	Promoter	11	68839914	68864993	25080	2	83431	ENSMUST00000127469.1	0	ENSMUSG00000018736	Ndel1	nudE neurodevelopment protein 1 like 1
chrX	13569232	13570223	992	*	705	-2.61726	5.09984	2.99773e-14	ATAC_PP_unique	13.8442	84.9458	Intron (ENSMUST00000156096.7/12361, intron 11 of 23)	20	13533340	13559331	25992	2	12361	ENSMUST00000139735.2	-9901	ENSMUSG00000031012	Cask	calcium/calmodulin-dependent serine protein kinase (MAGUK family)
chr16	23515541	23516285	745	*	515	-2.00013	5.85798	3.00724e-14	merged_common	28.9987	116.005	Intron (ENSMUST00000089883.6/17174, intron 1 of 15)	16	23520291	23614222	93932	1	67775	ENSMUST00000209422.1	-4006	ENSMUSG00000033355	Rtp4	receptor transporter protein 4
chr5	62846462	62847371	910	*	461	-1.16231	7.40839	3.08756e-14	merged_common	113.554	254.152	Intron (ENSMUST00000170704.1/100322896, intron 6 of 8)	5	62813823	62888308	74486	1	100322896	ENSMUST00000170704.1	32639	ENSMUSG00000090326	Dthd1	death domain containing 1
chr3	68778463	68778969	507	*	370	-1.61829	6.43605	3.09177e-14	merged_common	49.416	151.712	Distal Intergenic	3	68761495	68762667	1173	1	102639225	ENSMUST00000191767.1	16968	ENSMUSG00000102936	Gm35584	predicted gene, 35584
chr13	23898048	23898563	516	*	382	-2.02727	5.82012	3.11706e-14	merged_common	27.9831	114.068	3' UTR	13	23898729	23914968	16240	2	319848	ENSMUST00000021769.15	16405	ENSMUSG00000021336	Slc17a4	solute carrier family 17 (sodium phosphate), member 4
chr10	91138147	91138617	471	*	315	1.75604	6.22779	3.14705e-14	merged_common	137.741	40.7794	Distal Intergenic	10	91149230	91151833	2604	2	21917	ENSMUST00000215801.1	13216	ENSMUSG00000019961	Tmpo	thymopoietin
chr8	115581796	115582725	930	*	510	-1.25345	7.17823	3.18922e-14	merged_common	93.7993	223.628	Distal Intergenic	8	115701435	115707794	6360	2	17132	ENSMUST00000109104.1	125069	ENSMUSG00000055435	Maf	avian musculoaponeurotic fibrosarcoma oncogene homolog
chr15	25034974	25035671	698	*	381	-1.23345	7.23074	3.25198e-14	merged_common	97.9528	230.315	Distal Intergenic	15	25364857	25413698	48842	2	70350	ENSMUST00000228597.1	378027	ENSMUSG00000045763	Basp1	brain abundant, membrane attached signal protein 1
chr14	75044841	75045707	867	*	467	1.22795	7.22882	3.25198e-14	merged_common	229.571	98.0092	Intron (ENSMUST00000036072.7/271221, intron 9 of 13)	14	75036622	75052525	15904	1	271221	ENSMUST00000228689.1	8219	ENSMUSG00000034959	Rubcnl	RUN and cysteine rich domain containing beclin 1 interacting protein like
chr6	122989529	122990657	1129	*	540	-1.11635	7.49982	3.26235e-14	merged_common	122.926	266.501	Promoter	6	122990367	123024105	33739	1	474145	ENSMUST00000079379.2	0	ENSMUSG00000059639	Clec4a4	C-type lectin domain family 4, member a4
chr1	164681429	164681959	531	*	338	-2.22551	5.56593	3.27661e-14	merged_common	21.9048	102.444	Intron (ENSMUST00000195748.1/ENSMUST00000195748.1, intron 1 of 3)	1	164796644	164824266	27623	1	56429	ENSMUST00000027861.5	-114685	ENSMUSG00000026574	Dpt	dermatopontin
chr1	56100212	56100691	480	*	168	-2.22551	5.56593	3.27661e-14	ATAC_PP_unique	21.9048	102.444	Distal Intergenic	1	56019023	56020137	1115	1	69356	ENSMUST00000190280.1	81189	ENSMUSG00000100372	1700003I22Rik	RIKEN cDNA 1700003I22 gene
chr2	32450871	32452914	2044	*	1167	0.74437	8.65282	3.30915e-14	merged_common	520.951	310.971	Promoter	2	32414487	32451422	36936	2	227731	ENSMUST00000028160.14	0	ENSMUSG00000026819	Slc25a25	solute carrier family 25 (mitochondrial carrier, phosphate carrier), member 25
chr10	23802669	23803580	912	*	474	-2.11789	5.69937	3.32374e-14	merged_common	24.9406	108.257	Intron (ENSMUST00000119597.7/76306, intron 2 of 13)	10	23805976	23819081	13106	1	76306	ENSMUST00000127841.1	-2396	ENSMUSG00000037455	Slc18b1	solute carrier family 18, subfamily B, member 1
chr2	30718832	30719513	682	*	363	2.13428	5.65644	3.34016e-14	merged_common	105.682	24.0723	Intron (ENSMUST00000134755.1/ENSMUST00000134755.1, intron 2 of 4)	2	30721210	30721293	84	1	100526499	ENSMUST00000175350.1	-1697	ENSMUSG00000093091	Mir3089	microRNA 3089
chr7	28765009	28765638	630	*	331	2.13428	5.65644	3.34016e-14	merged_common	105.682	24.0723	Promoter	7	28759032	28766514	7483	2	18036	ENSMUST00000085851.11	876	ENSMUSG00000030595	Nfkbib	nuclear factor of kappa light polypeptide gene enhancer in B cells inhibitor, beta
chr10	117754706	117756098	1393	*	918	-0.94774	7.96136	3.35445e-14	merged_common	179.456	346.144	Intron (ENSMUST00000218576.1/103468, intron 26 of 27)	10	117757285	117761357	4073	2	103468	ENSMUST00000218375.1	5259	ENSMUSG00000052798	Nup107	nucleoporin 107
chr3	67575809	67577212	1404	*	664	0.93536	7.99975	3.58599e-14	merged_common	353.957	185.088	Distal Intergenic	3	67582741	67604237	21497	1	66868	ENSMUST00000029344.9	-5529	ENSMUSG00000027775	Mfsd1	major facilitator superfamily domain containing 1
chr11	117877630	117879819	2190	*	1130	0.95219	7.94754	3.5892e-14	merged_common	343.374	177.472	Intron (ENSMUST00000125607.1/ENSMUST00000125607.1, intron 3 of 3)	11	117867952	117873481	5530	2	71776	ENSMUST00000153989.1	-4149	ENSMUSG00000017713	Tha1	threonine aldolase 1
chr18	84680352	84681301	950	*	452	1.14355	7.42132	3.59373e-14	merged_common	254.778	115.324	Promoter	18	84667470	84681996	14527	2	66054	ENSMUST00000168419.1	695	ENSMUSG00000024644	Cndp2	CNDP dipeptidase 2 (metallopeptidase M20 family)
chr17	28217503	28218826	1324	*	315	1.88535	6.02662	3.62741e-14	merged_common	125.305	33.9172	Promoter	17	28217033	28219981	2949	1	23853	ENSMUST00000233534.1	470	ENSMUSG00000002257	Def6	differentially expressed in FDCP 6
chr7	141016527	141017547	1021	*	539	1.34459	6.98824	3.7316e-14	merged_common	202.326	79.6689	Promoter	7	141015706	141016908	1203	2	213002	ENSMUST00000081924.4	0	ENSMUSG00000059108	Ifitm6	interferon induced transmembrane protein 6
chr3	59119645	59120812	1168	*	498	0.97645	7.87184	3.7527e-14	merged_common	328.572	166.99	Intron (ENSMUST00000199659.4/329650, intron 15 of 43)	3	59114626	59130622	15997	2	140795	ENSMUST00000091112.5	9810	ENSMUSG00000036381	P2ry14	purinergic receptor P2Y, G-protein coupled, 14
chr12	108224701	108226438	1738	*	1187	-1.16664	7.35651	3.76989e-14	merged_common	109.379	245.543	Intron (ENSMUST00000222310.1/668158, intron 1 of 5)	12	108199085	108202146	3062	1	12454	ENSMUST00000223363.1	25616	ENSMUSG00000021258	Ccnk	cyclin K
chr7	128050596	128051145	550	*	349	2.46576	5.24593	3.85916e-14	ATAC_PL_unique	89.19	16.1454	Distal Intergenic	7	128062640	128118491	55852	1	16409	ENSMUST00000064821.13	-11495	ENSMUSG00000030786	Itgam	integrin alpha M
chr18	39445937	39446415	479	*	187	2.46576	5.24593	3.85916e-14	ATAC_PL_unique	89.19	16.1454	Intron (ENSMUST00000115567.7/14815, intron 2 of 8)	18	39414482	39487232	72751	2	14815	ENSMUST00000097592.8	40817	ENSMUSG00000024431	Nr3c1	nuclear receptor subfamily 3, group C, member 1
chr10	126519642	126520424	783	*	348	-1.8925	5.99345	3.87742e-14	merged_common	33.0642	122.76	Distal Intergenic	10	126710282	126710391	110	2	102465224	ENSMUST00000184232.1	189967	ENSMUSG00000098756	Mir378d	microRNA 378d
chr2	158114601	158115336	736	*	371	3.09518	4.57487	3.87896e-14	ATAC_PL_unique	69.6697	8.15271	Intron (ENSMUST00000152452.7/70470, intron 5 of 5)	2	158070367	158091797	21431	2	72340	ENSMUST00000186977.1	-22804	ENSMUSG00000100860	2010009K17Rik	RIKEN cDNA 2010009K17 gene
chr9	119969282	119970706	1425	*	1064	3.09518	4.57487	3.87896e-14	ATAC_PL_unique	69.6697	8.15271	Intron (ENSMUST00000177637.1/13051, intron 2 of 2)	9	119971165	119977335	6171	2	215418	ENSMUST00000215916.1	6629	ENSMUSG00000032515	Csrnp1	cysteine-serine-rich nuclear protein 1
chr17	35197105	35197742	638	*	237	3.09518	4.57487	3.87896e-14	ATAC_PL_unique	69.6697	8.15271	Downstream (1-2kb)	17	35194972	35195049	78	1	102465588	ENSMUST00000183646.1	2133	ENSMUSG00000098291	Mir6973a	microRNA 6973a
chr8	94703369	94704773	1405	*	693	1.03873	7.69954	3.89723e-14	merged_common	297.946	145.027	Distal Intergenic	8	94674894	94696278	21385	2	67801	ENSMUST00000034227.5	-7091	ENSMUSG00000031775	Pllp	plasma membrane proteolipid
chr15	103313173	103314171	999	*	445	1.66698	6.37713	3.90351e-14	merged_common	148.12	46.6447	3' UTR	15	103308235	103310612	2378	2	80910	ENSMUST00000079824.5	-2561	ENSMUSG00000063234	Gpr84	G protein-coupled receptor 84
chr15	53555976	53556868	893	*	326	-0.90598	8.07743	3.96481e-14	merged_common	197.326	369.753	Intron (ENSMUST00000078673.13/320679, intron 4 of 4)	15	53614205	53614279	75	2	100628567	ENSMUST00000200096.1	57411	ENSMUSG00000104794	Mir28c	microRNA 28c
chr19	46629688	46630097	410	*	237	2.88035	4.78493	4.04435e-14	ATAC_PL_unique	74.8072	10.1595	Intron (ENSMUST00000138302.8/226178, intron 1 of 3)	19	46623401	46657385	33985	1	226178	ENSMUST00000111855.4	6287	ENSMUSG00000047731	Wbp1l	WW domain binding protein 1 like
chr11	75211980	75212728	749	*	283	-1.59772	6.45532	4.14317e-14	merged_common	50.4387	152.66	Intron (ENSMUST00000102514.3/237847, intron 1 of 1)	11	75193783	75267769	73987	1	237847	ENSMUST00000102514.3	18197	ENSMUSG00000045287	Rtn4rl1	reticulon 4 receptor-like 1
chr7	127421694	127422235	542	*	331	1.27508	7.10305	4.2657e-14	merged_common	213.87	88.3715	Promoter	7	127418967	127422027	3061	2	69234	ENSMUST00000136123.7	0	ENSMUSG00000045251	Zfp688	zinc finger protein 688
chr1	45880559	45882100	1542	*	878	-0.78358	8.49199	4.27321e-14	merged_common	274.412	472.372	Distal Intergenic	1	45918928	45923309	4382	2	53945	ENSMUST00000188252.6	41209	ENSMUSG00000025993	Slc40a1	solute carrier family 40 (iron-regulated transporter), member 1
chr17	29094322	29095760	1439	*	1232	1.26494	7.12914	4.35845e-14	merged_common	217.009	90.301	Promoter	17	29093781	29100727	6947	1	12575	ENSMUST00000233296.1	541	ENSMUSG00000023067	Cdkn1a	cyclin-dependent kinase inhibitor 1A (P21)
chr11	119863107	119863889	783	*	566	1.26494	7.12914	4.35845e-14	merged_common	217.009	90.301	Intron (ENSMUST00000026671.12/74370, intron 20 of 33)	11	119857444	119884967	27524	1	74370	ENSMUST00000131217.1	5663	ENSMUSG00000025583	Rptor	regulatory associated protein of MTOR, complex 1
chr18	53149368	53150238	871	*	354	1.17523	7.36311	4.40856e-14	merged_common	247.404	109.554	Distal Intergenic	18	53176365	53220860	44496	1	67804	ENSMUST00000037850.5	-26127	ENSMUSG00000034484	Snx2	sorting nexin 2
chr11	54522287	54523457	1171	*	478	0.9111	8.06697	4.70499e-14	merged_common	367.734	195.554	Promoter	11	54522847	54699285	176439	1	192786	ENSMUST00000102743.9	0	ENSMUSG00000037533	Rapgef6	Rap guanine nucleotide exchange factor (GEF) 6
chr6	96086984	96087640	657	*	165	-1.30685	7.0359	4.73204e-14	merged_common	83.4289	206.404	Distal Intergenic	6	96113154	96657198	544045	1	320265	ENSMUST00000122120.7	-25514	ENSMUSG00000059187	Tafa1	TAFA chemokine like family member 1
chr17	80719227	80719924	698	*	269	-1.49339	6.67076	4.78201e-14	merged_common	60.7185	170.953	Intron (ENSMUST00000112389.8/225028, intron 1 of 34)	17	80580517	80728024	147508	2	225028	ENSMUST00000234133.1	8100	ENSMUSG00000024242	Map4k3	mitogen-activated protein kinase kinase kinase kinase 3
chr7	75854420	75856021	1602	*	799	-1.49339	6.67076	4.78201e-14	merged_common	60.7185	170.953	Intron (ENSMUST00000171155.3/207952, intron 1 of 2)	7	75848441	75865627	17187	1	207952	ENSMUST00000205887.1	5979	ENSMUSG00000055652	Klhl25	kelch-like 25
chr11	20464450	20465243	794	*	355	1.30377	7.05287	4.8855e-14	merged_common	208.623	84.5062	Distal Intergenic	11	20543253	20597020	53768	1	58172	ENSMUST00000145328.1	-78010	ENSMUSG00000049800	Sertad2	SERTA domain containing 2
chr4	109116377	109116878	502	*	329	1.83957	6.08496	4.89986e-14	merged_common	128.422	35.8817	Promoter	4	109068363	109117698	49336	2	100273	ENSMUST00000126288.7	820	ENSMUSG00000028559	Osbpl9	oxysterol binding protein-like 9
chr13	56601152	56601761	610	*	293	1.83957	6.08496	4.89986e-14	merged_common	128.422	35.8817	Distal Intergenic	13	56609523	56639562	30040	1	21810	ENSMUST00000225600.1	-7762	ENSMUSG00000035493	Tgfbi	transforming growth factor, beta induced
chr14	16457136	16457781	646	*	116	-1.82058	6.08496	4.89986e-14	merged_common	36.1186	127.579	Intron (ENSMUST00000063750.7/218772, intron 3 of 7)	14	16423288	16428505	5218	1	21974	ENSMUST00000163032.1	33848	ENSMUSG00000017485	Top2b	topoisomerase (DNA) II beta
chr9	83599276	83599883	608	*	489	-1.82058	6.08496	4.89986e-14	merged_common	36.1186	127.579	3' UTR	9	83576831	83597524	20694	1	212531	ENSMUST00000185664.1	22445	ENSMUSG00000032261	Sh3bgrl2	SH3 domain binding glutamic acid-rich protein like 2
chr4	144890464	144893271	2808	*	1940	-0.73768	8.66187	5.01412e-14	merged_common	313.654	523.016	Promoter	4	144892827	144927642	34816	1	20148	ENSMUST00000105744.7	0	ENSMUSG00000066026	Dhrs3	dehydrogenase/reductase (SDR family) member 3
chr2	101177609	101178464	856	*	410	-1.4393	6.76111	5.01662e-14	merged_common	65.8659	178.621	Distal Intergenic	2	101562125	101576125	14001	2	68170	ENSMUST00000177152.1	397661	ENSMUSG00000027165	B230118H07Rik	RIKEN cDNA B230118H07 gene
chr11	58301697	58303130	1434	*	741	0.98542	7.83455	5.04674e-14	merged_common	321.185	162.224	Distal Intergenic	11	58307069	58314613	7545	1	103836	ENSMUST00000153510.8	-3939	ENSMUSG00000037243	Zfp692	zinc finger protein 692
chr1	138541177	138542462	1286	*	711	-1.06904	7.59364	5.09921e-14	merged_common	133.354	279.782	Intron (ENSMUST00000188729.2/ENSMUST00000188729.2, intron 2 of 2)	1	138484112	138619674	135563	2	59125	ENSMUST00000027642.4	77212	ENSMUSG00000026393	Nek7	NIMA (never in mitosis gene a)-related expressed kinase 7
chr3	59214111	59216051	1941	*	1646	-2.28033	5.45345	5.10478e-14	ATAC_PP_unique	19.8805	96.5775	Intron (ENSMUST00000199659.4/329650, intron 15 of 43)	3	59207892	59210882	2991	2	74191	ENSMUST00000040622.2	-3229	ENSMUSG00000036362	P2ry13	purinergic receptor P2Y, G-protein coupled 13
chr4	83308898	83309444	547	*	259	2.27612	5.46832	5.10478e-14	ATAC_PL_unique	97.4358	20.1158	Intron (ENSMUST00000102823.9/69863, intron 1 of 19)	4	83259198	83324189	64992	2	69863	ENSMUST00000030205.13	14745	ENSMUSG00000038172	Ttc39b	tetratricopeptide repeat domain 39B
chr4	15268580	15269269	690	*	558	-1.33769	6.95892	5.11659e-14	merged_common	78.2531	197.782	Intron (ENSMUST00000062684.8/100201, intron 1 of 2)	4	15265831	15286753	20923	1	100201	ENSMUST00000062684.8	2749	ENSMUSG00000043252	Tmem64	transmembrane protein 64
chr2	143093357	143094054	698	*	508	-1.15613	7.37843	5.14565e-14	merged_common	111.459	248.395	Distal Intergenic	2	143078473	143081713	3241	1	57329	ENSMUST00000028902.2	14884	ENSMUSG00000027416	Otor	otoraplin
chr5	135167952	135169047	1096	*	860	0.85606	8.22954	5.15064e-14	merged_common	403.82	223.094	Promoter	5	135168283	135181855	13573	1	12054	ENSMUST00000031692.11	0	ENSMUSG00000029681	Bcl7b	B cell CLL/lymphoma 7B
chr8	71667979	71668967	989	*	307	1.17567	7.35065	5.22475e-14	merged_common	245.314	108.595	Promoter	8	71660346	71668082	7737	2	382018	ENSMUST00000175780.1	0	ENSMUSG00000034799	Unc13a	unc-13 homolog A
chr1	150760807	150761349	543	*	182	-1.83984	6.05328	5.29717e-14	merged_common	35.099	125.644	Intron (ENSMUST00000177268.1/ENSMUST00000177268.1, intron 1 of 1)	1	150563684	150583212	19529	2	545370	ENSMUST00000177036.1	-177595	ENSMUSG00000066842	Hmcn1	hemicentin 1
chr10	99081567	99082151	585	*	91	2.06237	5.73431	5.30402e-14	merged_common	108.797	26.0484	Distal Intergenic	10	99107036	99197988	90953	1	382406	ENSMUST00000020113.14	-24885	ENSMUSG00000019952	Poc1b	POC1 centriolar protein B
chr2	101174683	101175617	935	*	637	-1.11307	7.48582	5.30441e-14	merged_common	121.877	263.627	Distal Intergenic	2	101562125	101576125	14001	2	68170	ENSMUST00000177152.1	400508	ENSMUSG00000027165	B230118H07Rik	RIKEN cDNA B230118H07 gene
chr14	21678595	21680291	1697	*	1227	-1.37926	6.88119	5.37021e-14	merged_common	73.0879	190.127	Intron (ENSMUST00000073870.6/435391, intron 3 of 3)	14	21684946	21703102	18157	2	435391	ENSMUST00000224735.1	22811	ENSMUSG00000063821	Dupd1	dual specificity phosphatase and pro isomerase domain containing 1
chr16	87716115	87716767	653	*	361	2.18596	5.55882	5.39055e-14	ATAC_PL_unique	100.552	22.0979	Intron (ENSMUST00000026703.5/12013, intron 2 of 4)	16	87699004	87722920	23917	1	12013	ENSMUST00000156958.1	17111	ENSMUSG00000025612	Bach1	BTB and CNC homology 1, basic leucine zipper transcription factor 1
chr10	62509102	62509895	794	*	301	2.09047	5.69266	5.39795e-14	ATAC_PL_unique	106.735	25.0619	Intron (ENSMUST00000160987.7/19073, intron 1 of 3)	10	62507676	62508097	422	2	19073	ENSMUST00000159020.1	-1005	ENSMUSG00000020077	Srgn	serglycin
chr7	122315830	122316282	453	*	220	2.09047	5.69266	5.39795e-14	merged_common	106.735	25.0619	Exon (ENSMUST00000205846.1/ENSMUST00000205846.1, exon 1 of 1)	7	122290028	122425041	135014	1	18751	ENSMUST00000131167.7	25802	ENSMUSG00000052889	Prkcb	protein kinase C, beta
chr9	94702948	94704325	1378	*	636	-1.20603	7.26209	5.40036e-14	merged_common	101.06	233.148	Intron (ENSMUST00000033463.9/331004, intron 2 of 15)	9	94669932	94718846	48915	1	331004	ENSMUST00000162870.1	33016	ENSMUSG00000031129	Slc9a9	solute carrier family 9 (sodium/hydrogen exchanger), member 9
chr7	118577558	118579077	1520	*	1067	-1.21818	7.23821	5.40355e-14	merged_common	98.9838	230.289	Intron (ENSMUST00000044195.5/209760, intron 1 of 15)	7	118546585	118584686	38102	2	209760	ENSMUST00000153635.1	5609	ENSMUSG00000042246	Tmc7	transmembrane channel-like gene family 7
chr12	85704717	85706269	1553	*	976	0.72271	8.71031	5.42196e-14	merged_common	538.076	326.051	Intron (ENSMUST00000040536.5/53314, intron 2 of 2)	12	85686669	85709087	22419	1	53314	ENSMUST00000040536.5	18048	ENSMUSG00000034266	Batf	basic leucine zipper transcription factor, ATF-like
[truncated: 79,549 more rows]

## Sheet: ATAC_PL_vs_LL
seqnames	start	end	width	strand	summit	M_value	A_value	P_value	Peak_Group	normalized_read_density_in_ATAC_PL	normalized_read_density_in_ATAC_LL	annotation	geneChr	geneStart	geneEnd	geneLength	geneStrand	geneId	transcriptId	distanceToTSS	ENSEMBL	SYMBOL	GENENAME
[truncated: 79,411 more rows]

[truncated: 7 more sheets: ATAC_LL_vs_LP, H3K4me3_PL_vs_PP, H3K4me3_PL_vs_LL, H3K4me3_LL_vs_LP, H3K27ac_PL_vs_PP, H3K27ac_PL_vs_LL, H3K27ac_LL_vs_LP]
