# Supplementary material for: Epigenetic regulation of innate immune memory in microglia
Source: J Neuroinflammation. 2022 May 14;19:111. doi: 10.1186/s12974-022-02463-5 (PMC9107649; doi:10.1186/s12974-022-02463-5)
Supplement: Supplementary file 11 — Additional file 11: Annotated differential ATAC, H3K4me1, H3K4me3, H3K27ac and H3K27ac peaks in microglia of KO-PBS versus WT-PBS, KO-LPS versus WT-LPS, WT-LPS versus WT-PBS and KO-LPS versus WT-PBS mice (related to Fig. 4A, 4B). [file 12974_2022_2463_MOESM11_ESM.xlsx]

## Sheet: ATAC_KO_PBS_vs_ATAC_WT_PBS
seqnames	start	end	width	strand	summit	M_value	A_value	P_value	Peak_Group	normalized_read_density_in_ATAC_KO_PBS	normalized_read_density_in_ATAC_Control_PBS	annotation	geneChr	geneStart	geneEnd	geneLength	geneStrand	geneId	transcriptId	distanceToTSS	ENSEMBL	SYMBOL	GENENAME
chr5	17854169	17855125	957	*	521	3.52289	6.2854	1.06878e-53	ATAC_KO_PBS_unique	264.449	23.0063	Intron (ENSMUST00000169095.5/12491, intron 1 of 15)	5	17781690	17849792	68103	2	12491	ENSMUST00000170051.7	-4377	ENSMUSG00000002944	Cd36	CD36 molecule
chr17	39846680	39847011	332	*	247	-1.40623	8.52989	9.63945e-41	merged_common	227.036	601.744	Promoter	17	39846958	39848788	1831	1	100861531	ENSMUST00000182010.1	0	NA	Rn45s	45S pre-ribosomal RNA
chr13	89888720	89889640	921	*	565	2.78467	6.40186	7.69803e-37	merged_common	221.966	32.212	Intron (ENSMUST00000159199.7/108138, intron 7 of 8)	13	89655312	89742509	87198	2	13003	ENSMUST00000109546.8	-146211	ENSMUSG00000021614	Vcan	versican
chr7	117470093	117471076	984	*	583	2.52624	6.4962	2.54454e-32	merged_common	216.665	37.6109	Intron (ENSMUST00000160035.7/233781, intron 1 of 6)	7	117475492	117549359	73868	1	233781	ENSMUST00000161889.1	-4416	ENSMUSG00000030657	Xylt1	xylosyltransferase 1
chr3	103400750	103401995	1246	*	672	-2.41253	6.57788	1.76565e-31	merged_common	41.4016	220.425	Distal Intergenic	3	103341682	103355563	13882	1	94093	ENSMUST00000197365.1	59068	ENSMUSG00000033014	Trim33	tripartite motif-containing 33
chr3	83884950	83885729	780	*	422	3.96673	5.01809	1.35076e-29	ATAC_KO_PBS_unique	128.129	8.19489	Distal Intergenic	3	83900332	83907579	7248	2	229473	ENSMUST00000199411.4	21850	ENSMUSG00000033767	Tmem131l	transmembrane 131 like
chr17	39847237	39847403	167	*	117	-1.42782	7.90532	5.82662e-28	merged_common	146.161	393.23	Promoter	17	39846958	39848788	1831	1	100861531	ENSMUST00000182010.1	279	NA	Rn45s	45S pre-ribosomal RNA
chr2	49275906	49276822	917	*	313	2.67257	6.06012	2.59818e-27	ATAC_KO_PBS_unique	168.477	26.4251	Intron (ENSMUST00000112754.7/109241, intron 11 of 14)	2	49279474	49316652	37179	1	109241	ENSMUST00000196045.1	-2652	ENSMUSG00000036792	Mbd5	methyl-CpG binding domain protein 5
chr3	54246013	54247033	1021	*	597	2.54944	6.20576	3.50375e-27	ATAC_KO_PBS_unique	178.587	30.5064	Intron (ENSMUST00000029311.10/22066, intron 3 of 10)	3	54156615	54318416	161802	1	22066	ENSMUST00000200341.1	89398	ENSMUSG00000027748	Trpc4	transient receptor potential cation channel, subfamily C, member 4
chr7	19693356	19694142	787	*	196	3.06694	5.62928	1.17654e-26	ATAC_KO_PBS_unique	143.286	17.0986	Promoter	7	19689481	19692660	3180	2	11812	ENSMUST00000045035.11	-696	ENSMUSG00000040564	Apoc1	apolipoprotein C-I
chr12	25438102	25439182	1081	*	518	2.91309	5.75785	3.07827e-26	ATAC_KO_PBS_unique	148.508	19.7161	Intron (ENSMUST00000221270.1/ENSMUST00000221270.1, intron 6 of 7)	12	25129174	25134931	5758	1	432641	ENSMUST00000223429.1	308928	NA	Gm17746	predicted gene, 17746
chr7	117486490	117487360	871	*	194	2.62262	6.03237	6.9277e-26	ATAC_KO_PBS_unique	162.431	26.3743	Intron (ENSMUST00000160035.7/233781, intron 2 of 6)	7	117475492	117549359	73868	1	233781	ENSMUST00000161889.1	10998	ENSMUSG00000030657	Xylt1	xylosyltransferase 1
chr10	118103019	118103748	730	*	350	2.52821	6.12574	1.11536e-25	merged_common	167.712	29.0735	Distal Intergenic	10	118141811	118146760	4950	1	17245	ENSMUST00000219827.1	-38063	ENSMUSG00000020212	Mdm1	transformed mouse 3T3 cell double minute 1
chr9	123461748	123462232	485	*	382	-1.1803	8.30566	1.67008e-25	merged_common	210.184	476.327	3' UTR	9	123454790	123461899	7110	1	102436	ENSMUST00000215087.1	6958	ENSMUSG00000035202	Lars2	leucyl-tRNA synthetase, mitochondrial
chr15	91282732	91283239	508	*	271	2.91982	5.65814	5.21459e-25	ATAC_KO_PBS_unique	138.914	18.3566	Intron (ENSMUST00000109283.1/239606, intron 7 of 9)	15	91145871	91191799	45929	2	26874	ENSMUST00000069511.7	-90933	ENSMUSG00000055782	Abcd2	ATP-binding cassette, sub-family D (ALD), member 2
chr3	54238749	54239873	1125	*	337	3.22324	5.32955	2.77673e-24	ATAC_KO_PBS_unique	122.885	13.1586	Intron (ENSMUST00000029311.10/22066, intron 3 of 10)	3	54156615	54318416	161802	1	22066	ENSMUST00000200341.1	82134	ENSMUSG00000027748	Trpc4	transient receptor potential cation channel, subfamily C, member 4
chr12	25389046	25389719	674	*	320	2.88106	5.63661	5.10054e-24	ATAC_KO_PBS_unique	135.03	18.3293	Intron (ENSMUST00000221460.1/ENSMUST00000221460.1, intron 2 of 3)	12	25129174	25134931	5758	1	432641	ENSMUST00000223429.1	259872	NA	Gm17746	predicted gene, 17746
chr2	46370841	46371543	703	*	262	3.52843	4.98864	2.48532e-23	ATAC_KO_PBS_unique	107.848	9.34649	Distal Intergenic	2	45696800	45698067	1268	1	69405	ENSMUST00000134308.1	674041	ENSMUSG00000086202	1700019E08Rik	RIKEN cDNA 1700019E08 gene
chr4	56756900	56758192	1293	*	595	2.0958	6.51205	2.5911e-23	merged_common	188.7	44.1441	Promoter	4	56751012	56757285	6274	2	230233	ENSMUST00000171411.7	0	ENSMUSG00000028431	Elp1	elongator complex protein 1
chr1	128712567	128713313	747	*	426	3.00158	5.47418	4.87037e-23	ATAC_KO_PBS_unique	125.798	15.7076	Distal Intergenic	1	128589099	128592293	3195	2	12767	ENSMUST00000142893.1	-120274	ENSMUSG00000045382	Cxcr4	chemokine (C-X-C motif) receptor 4
chr15	19856834	19858093	1260	*	708	1.49943	7.44885	6.83429e-23	merged_common	293.774	103.906	Distal Intergenic	15	19185373	19203329	17957	1	102639102	ENSMUST00000226343.1	671461	ENSMUSG00000115803	Gm35496	predicted gene, 35496
chr3	65353095	65354172	1078	*	369	2.69808	5.73558	1.71724e-22	ATAC_KO_PBS_unique	135.732	20.9161	Promoter	3	65353767	65358820	5054	1	16497	ENSMUST00000161956.1	0	ENSMUSG00000027827	Kcnab1	potassium voltage-gated channel, shaker-related subfamily, beta member 1
chrY	90810015	90813058	3044	*	2447	-1.62359	7.15246	5.70096e-22	merged_common	81.0458	249.735	Intron (ENSMUST00000179483.7/170942, intron 3 of 3)	21	90785586	90816464	30879	1	170942	ENSMUST00000179077.1	24429	ENSMUSG00000096768	Erdr1	erythroid differentiation regulator 1
chr10	23171502	23172068	567	*	190	2.46729	5.94608	6.38728e-22	ATAC_KO_PBS_unique	144.982	26.2171	Exon (ENSMUST00000219315.1/14051, exon 5 of 20)	10	23170009	23185606	15598	2	14051	ENSMUST00000220038.1	13538	ENSMUSG00000010461	Eya4	EYA transcriptional coactivator and phosphatase 4
chr10	10449079	10449680	602	*	163	3.22486	5.17768	6.76312e-22	ATAC_KO_PBS_unique	110.669	11.8371	Intron (ENSMUST00000179956.7/215772, intron 2 of 36)	10	10399902	10429839	29938	2	215772	ENSMUST00000045328.13	-19240	ENSMUSG00000050994	Adgb	androglobin
chr9	14835036	14836106	1071	*	521	1.77836	6.8547	1.69085e-21	merged_common	214.358	62.4885	3' UTR	9	14860210	14870789	10580	1	14608	ENSMUST00000034408.11	-24104	ENSMUSG00000031932	Gpr83	G protein-coupled receptor 83
chr15	28374210	28374968	759	*	310	2.20457	6.20297	5.16811e-21	merged_common	158.162	34.313	Intron (ENSMUST00000067048.7/110082, intron 52 of 78)	15	28203752	28472052	268301	1	110082	ENSMUST00000067048.7	170458	ENSMUSG00000022262	Dnah5	dynein, axonemal, heavy chain 5
chr2	91971745	91972691	947	*	571	2.05813	6.39395	5.36322e-21	merged_common	171.613	41.2089	Intron (ENSMUST00000099709.9/104418, intron 1 of 30)	2	91932824	91975864	43041	2	104418	ENSMUST00000099709.9	3173	ENSMUSG00000040479	Dgkz	diacylglycerol kinase zeta
chr6	42396100	42396796	697	*	474	2.41607	5.91763	8.86507e-21	ATAC_KO_PBS_unique	139.649	26.1655	Distal Intergenic	6	42400238	42401119	882	1	387514	ENSMUST00000057398.3	-3442	ENSMUSG00000046652	Tas2r143	taste receptor, type 2, member 143
chr4	48418908	48419743	836	*	357	2.36445	5.96352	9.71927e-21	ATAC_KO_PBS_unique	141.607	27.4988	Intron (ENSMUST00000030029.9/16348, intron 13 of 16)	4	48382188	48396314	14127	1	16348	ENSMUST00000129480.1	36720	ENSMUSG00000028344	Invs	inversin
chr6	101366890	101367863	974	*	486	3.06366	5.2409	1.03287e-20	ATAC_KO_PBS_unique	109.344	13.078	Intron (ENSMUST00000075994.10/55983, intron 1 of 9)	6	101179878	101377342	197465	2	55983	ENSMUST00000151175.2	9479	ENSMUSG00000035357	Pdzrn3	PDZ domain containing RING finger 3
chr6	39278023	39278871	849	*	567	2.50593	5.80712	1.06363e-20	ATAC_KO_PBS_unique	133.443	23.4929	Distal Intergenic	6	39343910	39347350	3441	2	72144	ENSMUST00000201208.1	68479	ENSMUSG00000029924	Slc37a3	solute carrier family 37 (glycerol-3-phosphate transporter), member 3
chr18	39020550	39021415	866	*	464	2.0326	6.42909	1.32972e-20	merged_common	174.295	42.6003	Intron (ENSMUST00000148850.7/71302, intron 2 of 5)	18	38993476	39371162	377687	1	71302	ENSMUST00000155576.7	27074	ENSMUSG00000036452	Arhgap26	Rho GTPase activating protein 26
chr10	19009169	19009748	580	*	369	2.95521	5.32012	1.43995e-20	ATAC_KO_PBS_unique	111.255	14.3454	Promoter	10	19007267	19008845	1579	2	21929	ENSMUST00000154749.1	-324	ENSMUSG00000019850	Tnfaip3	tumor necrosis factor, alpha-induced protein 3
chr2	103605829	103606460	632	*	246	2.37904	5.97162	1.76411e-20	ATAC_KO_PBS_unique	143.126	27.5141	Intron (ENSMUST00000076212.3/99382, intron 1 of 16)	2	103566310	103718423	152114	1	99382	ENSMUST00000076212.3	39519	ENSMUSG00000032724	Abtb2	ankyrin repeat and BTB (POZ) domain containing 2
chr13	24791189	24792042	854	*	408	2.45564	5.8614	2.28776e-20	ATAC_KO_PBS_unique	136.166	24.8226	Distal Intergenic	13	24801657	24816197	14541	1	79555	ENSMUST00000019276.11	-9615	ENSMUSG00000019132	BC005537	cDNA sequence BC005537
chr13	7771580	7773280	1701	*	856	2.87611	5.40448	2.54241e-20	ATAC_KO_PBS_unique	114.765	15.6319	Distal Intergenic	13	8202866	8761530	558665	1	94191	ENSMUST00000064473.12	-429586	ENSMUSG00000052551	Adarb2	adenosine deaminase, RNA-specific, B2
chr13	80948966	80949872	907	*	295	2.32293	6.0117	3.14252e-20	ATAC_KO_PBS_unique	144.324	28.8447	Distal Intergenic	13	80941086	80942073	988	1	71416	ENSMUST00000224509.1	7880	NA	5430425K12Rik	RIKEN cDNA 5430425K12 gene
chr12	35799067	35799897	831	*	377	1.6022	7.06605	3.69182e-20	merged_common	233.479	76.902	Distal Intergenic	12	35672380	35695118	22739	2	71581	ENSMUST00000222153.1	-103949	ENSMUSG00000113985	9130015A21Rik	RIKEN cDNA 9130015A21 gene
chr15	35757053	35757819	767	*	220	1.83013	6.66455	7.14074e-20	merged_common	191.29	53.7982	Intron (ENSMUST00000048646.8/666173, intron 35 of 61)	15	35834215	35843534	9320	1	666173	ENSMUST00000227567.1	-76396	ENSMUSG00000037646	Vps13b	vacuolar protein sorting 13B
chr6	122862545	122863252	708	*	526	2.4087	5.83533	1.8508e-19	ATAC_KO_PBS_unique	131.569	24.7779	Distal Intergenic	6	122847138	122856161	9024	2	12267	ENSMUST00000042081.8	-6384	ENSMUSG00000040552	C3ar1	complement component 3a receptor 1
chr9	99182072	99182767	696	*	211	1.84588	6.59313	2.18569e-19	merged_common	183.047	50.921	Distal Intergenic	9	99101350	99140621	39272	2	74769	ENSMUST00000124723.1	-41451	ENSMUSG00000032462	Pik3cb	phosphatidylinositol-4,5-bisphosphate 3-kinase catalytic subunit beta
chr18	5123134	5123982	849	*	380	2.82819	5.37786	2.40022e-19	ATAC_KO_PBS_unique	110.811	15.6031	Distal Intergenic	18	5114253	5119218	4966	1	225115	ENSMUST00000129543.1	8881	ENSMUSG00000024236	Svil	supervillin
chr1	72106519	72107756	1238	*	755	2.89527	5.28682	2.51805e-19	ATAC_KO_PBS_unique	106.481	14.3123	Exon (ENSMUST00000191139.1/ENSMUST00000191139.1, exon 4 of 4)	1	71958998	72005195	46198	2	71134	ENSMUST00000188213.1	-101324	ENSMUSG00000101848	4933417E11Rik	RIKEN cDNA 4933417E11 gene
chr6	59184997	59185888	892	*	437	2.0309	6.27537	4.20665e-19	merged_common	156.587	38.3172	Distal Intergenic	6	59208870	59212033	3164	1	68140	ENSMUST00000062626.3	-22982	ENSMUSG00000049232	Tigd2	tigger transposable element derived 2
chr2	159591473	159592036	564	*	93	3.08915	5.10229	4.25332e-19	ATAC_KO_PBS_unique	100.209	11.7755	Distal Intergenic	2	159947341	159981288	33948	1	71081	ENSMUST00000133091.1	-355305	ENSMUSG00000085198	4933416E03Rik	RIKEN cDNA 4933416E03 gene
chr1	167553626	167554469	844	*	538	2.72997	5.44209	5.20383e-19	ATAC_KO_PBS_unique	111.978	16.8784	Distal Intergenic	1	167598384	167639623	41240	1	20183	ENSMUST00000015987.9	-43915	ENSMUSG00000015843	Rxrg	retinoid X receptor gamma
chr4	86689901	86690753	853	*	518	3.21156	5.00141	5.31534e-19	ATAC_KO_PBS_unique	97.4905	10.5241	Distal Intergenic	4	86656565	86670060	13496	2	11520	ENSMUST00000000466.12	-19841	ENSMUSG00000028494	Plin2	perilipin 2
chr10	62948172	62948970	799	*	535	2.28113	5.91724	9.95988e-19	ATAC_KO_PBS_unique	133.233	27.4108	Intron (ENSMUST00000131422.7/327762, intron 1 of 20)	10	62947110	62966135	19026	1	327762	ENSMUST00000129785.1	1062	ENSMUSG00000036875	Dna2	DNA replication helicase/nuclease 2
chr9	48744723	48745559	837	*	489	3.03293	5.07105	4.29656e-18	ATAC_KO_PBS_unique	96.17	11.75	Intron (ENSMUST00000093852.4/235320, intron 2 of 6)	9	48654297	48835945	181649	2	235320	ENSMUST00000093852.4	90386	ENSMUSG00000066687	Zbtb16	zinc finger and BTB domain containing 16
chr15	67481605	67482105	501	*	354	2.17397	5.99718	4.95888e-18	ATAC_KO_PBS_unique	135.689	30.0688	Distal Intergenic	15	67226769	67377094	150326	1	69334	ENSMUST00000187233.1	254836	ENSMUSG00000102069	1700012I11Rik	RIKEN cDNA 1700012I11 gene
chr5	43047929	43049793	1865	*	503	1.90537	6.35841	5.95677e-18	merged_common	158.803	42.3921	Distal Intergenic	5	43233170	43289724	56555	1	231207	ENSMUST00000169035.7	-183377	ENSMUSG00000039782	Cpeb2	cytoplasmic polyadenylation element binding protein 2
chr2	139919641	139920334	694	*	404	2.75798	5.33886	6.72845e-18	ATAC_KO_PBS_unique	105.263	15.5611	Intron (ENSMUST00000046656.8/75812, intron 10 of 13)	2	139976532	140042214	65683	2	75812	ENSMUST00000124949.1	121880	ENSMUSG00000039033	Tasp1	taspase, threonine aspartase 1
chr5	147747856	147748677	822	*	420	2.28258	5.84347	7.23131e-18	ATAC_KO_PBS_unique	126.655	26.0314	Exon (ENSMUST00000202338.1/ENSMUST00000202338.1, exon 2 of 2)	5	147561604	147726011	164408	2	14254	ENSMUST00000031653.11	-21845	ENSMUSG00000029648	Flt1	FMS-like tyrosine kinase 1
chr7	109545257	109546050	794	*	221	2.12438	6.03506	8.18969e-18	ATAC_KO_PBS_unique	136.926	31.4039	Intron (ENSMUST00000079282.7/76954, intron 4 of 19)	7	109524059	109540433	16375	2	76954	ENSMUST00000207664.1	-4824	ENSMUSG00000031024	St5	suppression of tumorigenicity 5
chr13	100183116	100183583	468	*	196	2.51807	5.53841	1.10772e-17	ATAC_KO_PBS_unique	111.233	19.4187	Intron (ENSMUST00000067975.11/17948, intron 4 of 14)	13	100144063	100197147	53085	2	17948	ENSMUST00000067975.11	13564	ENSMUSG00000078945	Naip2	NLR family, apoptosis inhibitory protein 2
chr2	73037293	73038785	1493	*	280	1.94599	6.28076	1.66691e-17	merged_common	152.615	39.6092	Distal Intergenic	2	72987241	72988607	1367	1	100503849	ENSMUST00000137941.1	50052	NA	Sp3os	trans-acting transcription factor 3, opposite strand
chr7	68667723	68668625	903	*	113	2.77763	5.22147	2.31362e-17	ATAC_KO_PBS_unique	97.6999	14.2477	Distal Intergenic	7	68618838	68619557	720	1	384639	ENSMUST00000187472.1	48885	NA	Gm5334	tetraspanin 7 pseudogene
chr16	24933610	24934062	453	*	370	4.35824	3.87744	2.31833e-17	ATAC_KO_PBS_unique	66.5589	3.24523	Intron (ENSMUST00000038053.13/210126, intron 10 of 12)	16	24845175	24979450	134276	1	210126	ENSMUST00000232546.1	88435	ENSMUSG00000033306	Lpp	LIM domain containing preferred translocation partner in lipoma
chr1	173766648	173767526	879	*	388	2.55135	5.45345	4.82486e-17	ATAC_KO_PBS_unique	106.089	18.0982	Promoter	1	173747293	173766919	19627	2	15951	ENSMUST00000111214.3	0	ENSMUSG00000073489	Ifi204	interferon activated gene 204
chr3	83844834	83845713	880	*	565	2.55135	5.45345	4.82486e-17	ATAC_KO_PBS_unique	106.089	18.0982	Distal Intergenic	3	83836272	83841767	5496	2	24088	ENSMUST00000029623.10	-3067	ENSMUSG00000027995	Tlr2	toll-like receptor 2
chr11	86586790	86587668	879	*	304	2.06967	6.06753	5.57031e-17	ATAC_KO_PBS_unique	137.412	32.7335	Promoter	11	86585020	86586994	1975	2	75909	ENSMUST00000145846.1	0	ENSMUSG00000018171	Vmp1	vacuole membrane protein 1
chr17	73947940	73949001	1062	*	428	2.32012	5.7039	7.86485e-17	ATAC_KO_PBS_unique	116.482	23.3256	Promoter	17	73926610	73948259	21650	2	22436	ENSMUST00000233433.1	0	ENSMUSG00000024066	Xdh	xanthine dehydrogenase
chr14	50833892	50834570	679	*	317	1.74969	6.49806	8.04319e-17	merged_common	165.755	49.2897	Promoter	14	50831075	50833962	2888	2	21745	ENSMUST00000227228.1	0	ENSMUSG00000006281	Tep1	telomerase associated protein 1
chr1	106627090	106627790	701	*	425	2.46906	5.51118	9.34475e-17	ATAC_KO_PBS_unique	107.315	19.3821	Intron (ENSMUST00000112751.1/12043, intron 1 of 1)	1	106546496	106546631	136	2	102466254	ENSMUST00000183743.1	-80459	ENSMUSG00000098344	Mir3473f	microRNA 3473f
chr2	152741186	152742819	1634	*	614	1.81199	6.40085	1.14041e-16	ATAC_KO_PBS_unique	158.336	45.0937	Distal Intergenic	2	152736251	152737410	1160	1	15901	ENSMUST00000038368.8	4935	ENSMUSG00000042745	Id1	inhibitor of DNA binding 1, HLH protein
chr12	25516520	25517187	668	*	472	2.65061	5.27921	1.51157e-16	ATAC_KO_PBS_unique	97.3099	15.4969	Distal Intergenic	12	25129174	25134931	5758	1	432641	ENSMUST00000223429.1	387346	NA	Gm17746	predicted gene, 17746
chr12	35826820	35827451	632	*	342	3.16173	4.78493	1.58281e-16	ATAC_KO_PBS_unique	82.4699	9.21552	Distal Intergenic	12	35925620	35949736	24117	1	403205	ENSMUST00000042101.4	-98169	ENSMUSG00000036231	Agr3	anterior gradient 3
chr8	3664337	3665157	821	*	242	2.03159	6.04638	2.32229e-16	ATAC_KO_PBS_unique	133.637	32.6856	Promoter	8	3665754	3669259	3506	1	69189	ENSMUST00000014118.3	-597	ENSMUSG00000013974	Mcemp1	mast cell expressed membrane protein 1
chr1	180848494	180849252	759	*	596	2.20592	5.80089	2.44126e-16	ATAC_KO_PBS_unique	119.747	25.9548	Distal Intergenic	1	180851127	180868113	16987	1	208768	ENSMUST00000038091.7	-1875	ENSMUSG00000038806	Sde2	SDE2 telomere maintenance homolog (S. pombe)
chr1	93070999	93071984	986	*	638	1.76729	6.42118	2.52874e-16	merged_common	158.114	46.4477	Intron (ENSMUST00000171796.7/16560, intron 10 of 47)	1	93066132	93068758	2627	2	16560	ENSMUST00000190249.1	-2241	ENSMUSG00000014602	Kif1a	kinesin family member 1A
chr2	113655752	113655847	96	*	25	2.81084	5.10045	3.0157e-16	ATAC_KO_PBS_unique	90.8787	12.9513	Intron (ENSMUST00000099576.8/14260, intron 15 of 18)	2	113685090	113693151	8062	1	14260	ENSMUST00000150510.7	-29243	ENSMUSG00000044042	Fmn1	formin 1
chr3	137263491	137264353	863	*	573	2.33116	5.62337	3.44638e-16	ATAC_KO_PBS_unique	110.58	21.975	Distal Intergenic	3	137341067	137432185	91119	1	59308	ENSMUST00000122064.7	-76714	ENSMUSG00000054690	Emcn	endomucin
chr18	23884355	23884910	556	*	241	2.57703	5.35712	3.59892e-16	ATAC_KO_PBS_unique	100.123	16.7792	Intron (ENSMUST00000170802.7/212307, intron 7 of 7)	18	23954705	23956576	1872	1	69256	ENSMUST00000225682.1	-69795	ENSMUSG00000024276	Zfp397	zinc finger protein 397
chr10	77265988	77266641	654	*	428	2.14953	5.84413	4.06429e-16	ATAC_KO_PBS_unique	121.003	27.2723	Promoter	10	77266917	77267564	648	1	80294	ENSMUST00000218117.1	-276	ENSMUSG00000020260	Pofut2	protein O-fucosyltransferase 2
chr7	25006595	25007151	557	*	188	2.98842	4.87744	4.07907e-16	ATAC_KO_PBS_unique	82.8052	10.4341	Promoter	7	24978167	25005958	27792	2	232975	ENSMUST00000080882.10	-637	ENSMUSG00000040907	Atp1a3	ATPase, Na+/K+ transporting, alpha 3 polypeptide
chr5	88981337	88982213	877	*	529	1.97941	6.07788	5.73743e-16	ATAC_KO_PBS_unique	134.139	34.0168	Intron (ENSMUST00000148750.7/54403, intron 3 of 25)	5	89027966	89234861	206896	1	54403	ENSMUST00000130041.7	-45753	ENSMUSG00000060961	Slc4a4	solute carrier family 4 (anion exchanger), member 4
chr19	11431210	11431550	341	*	174	4.26478	3.82553	5.91974e-16	ATAC_KO_PBS_unique	62.1602	3.2336	Distal Intergenic	19	11443553	11458193	14641	1	60361	ENSMUST00000136366.7	-12003	ENSMUSG00000056290	Ms4a4b	membrane-spanning 4-domains, subfamily A, member 4B
chr1	46852303	46854643	2341	*	1323	-0.728	8.9146	6.0834e-16	merged_common	374.962	621.065	Promoter	1	46807544	46854046	46503	2	227059	ENSMUST00000027131.5	0	ENSMUSG00000025986	Slc39a10	solute carrier family 39 (zinc transporter), member 10
chr6	122653871	122654906	1036	*	578	2.03047	5.98289	6.35851e-16	ATAC_KO_PBS_unique	127.834	31.2905	Distal Intergenic	6	122626753	122630272	3520	1	73708	ENSMUST00000123429.1	27118	ENSMUSG00000046323	Dppa3	developmental pluripotency-associated 3
chr4	102623825	102624630	806	*	415	1.87763	6.24279	6.40109e-16	merged_common	145.171	39.5053	Distal Intergenic	4	102589843	102603441	13599	1	18578	ENSMUST00000106901.1	33982	ENSMUSG00000028525	Pde4b	phosphodiesterase 4B, cAMP specific
chr9	105458894	105459556	663	*	309	1.77323	6.37932	6.63929e-16	merged_common	153.909	45.0266	Intron (ENSMUST00000177293.7/235574, intron 2 of 23)	9	105403539	105461030	57492	2	235574	ENSMUST00000177293.7	1474	ENSMUSG00000032570	Atp2c1	ATPase, Ca++-sequestering
chr19	23133971	23136538	2568	*	1102	1.85641	6.231	6.86584e-16	merged_common	142.934	39.473	Exon (ENSMUST00000142712.1/ENSMUST00000142712.1, exon 1 of 2)	19	23141226	23166911	25686	1	16601	ENSMUST00000036884.1	-4688	ENSMUSG00000033863	Klf9	Kruppel-like factor 9
chr6	108658888	108660948	2061	*	1562	1.96395	6.0693	9.15257e-16	ATAC_KO_PBS_unique	132.631	33.9967	Promoter	6	108660629	108666925	6297	1	20893	ENSMUST00000032194.10	0	ENSMUSG00000030103	Bhlhe40	basic helix-loop-helix family, member e40
chr12	76537382	76538265	884	*	296	1.76666	6.37567	1.02759e-15	merged_common	153.171	45.0152	Intron (ENSMUST00000217730.1/263406, intron 1 of 1)	12	76533620	76578682	45063	1	263406	ENSMUST00000219063.1	3762	ENSMUSG00000052609	Plekhg3	pleckstrin homology domain containing, family G (with RhoGef domain) member 3
chr8	72008120	72008817	698	*	479	2.54415	5.33886	1.05008e-15	ATAC_KO_PBS_unique	97.7439	16.7581	Promoter	8	71988482	72009626	21145	2	72054	ENSMUST00000003574.4	809	ENSMUSG00000003484	Cyp4f18	cytochrome P450, family 4, subfamily f, polypeptide 18
chr6	110020023	110020548	526	*	361	-2.55466	5.33974	1.05008e-15	ATAC_Control_PBS_unique	16.7073	98.1604	Distal Intergenic	6	110645581	111497090	851510	1	108073	ENSMUST00000174018.7	-625033	ENSMUSG00000056755	Grm7	glutamate receptor, metabotropic 7
chr7	130892941	130893694	754	*	189	1.87958	6.19131	1.1557e-15	merged_common	140.176	38.0947	Exon (ENSMUST00000148513.1/101476, exon 5 of 5)	7	130896991	130905426	8436	1	101476	ENSMUST00000149029.7	-3297	ENSMUSG00000040268	Plekha1	pleckstrin homology domain containing, family A (phosphoinositide binding specific) member 1
chr7	68682991	68683599	609	*	512	2.88715	4.99007	1.28162e-15	ATAC_KO_PBS_unique	86.4411	11.6843	Distal Intergenic	7	68618838	68619557	720	1	384639	ENSMUST00000187472.1	64153	NA	Gm5334	tetraspanin 7 pseudogene
chr13	24599431	24600127	697	*	303	1.99236	6.02458	1.52646e-15	ATAC_KO_PBS_unique	129.855	32.6362	Intron (ENSMUST00000110383.7/193385, intron 1 of 22)	13	24598890	24604696	5807	2	76024	ENSMUST00000127863.1	4569	NA	Gm11346	X-linked lymphocyte-regulated 5 pseudogene
chr19	52878658	52879457	800	*	373	1.84206	6.22302	1.69289e-15	ATAC_KO_PBS_unique	141.44	39.451	Distal Intergenic	19	52995364	52996633	1270	2	170750	ENSMUST00000182728.1	117176	ENSMUSG00000025027	Xpnpep1	X-prolyl aminopeptidase (aminopeptidase P) 1, soluble
chr1	71729000	71731571	2572	*	1294	1.60096	6.61358	1.69746e-15	merged_common	170.551	56.2234	Distal Intergenic	1	71653339	71657245	3907	1	100042814	ENSMUST00000125934.1	75661	ENSMUSG00000073652	Apol7d	apolipoprotein L 7d
chr6	149193323	149193969	647	*	329	2.11443	5.82463	1.76871e-15	ATAC_KO_PBS_unique	117.935	27.2355	Distal Intergenic	6	149157147	149188712	31566	2	232566	ENSMUST00000111535.7	-4611	ENSMUSG00000068250	Amn1	antagonist of mitotic exit network 1
chr10	85951660	85952405	746	*	588	1.87227	6.18725	1.81796e-15	ATAC_KO_PBS_unique	139.429	38.084	Intron (ENSMUST00000001834.3/28088, intron 3 of 11)	10	85948860	85955779	6920	2	28088	ENSMUST00000139413.1	3374	ENSMUSG00000001783	Rtcb	RNA 2',3'-cyclic phosphate and 5'-OH ligase
chr14	103033094	103034407	1314	*	810	1.62661	6.59011	1.91516e-15	merged_common	169.297	54.8266	Promoter	14	102987412	103033803	46392	2	71264	ENSMUST00000226662.1	0	ENSMUSG00000114980	4933432I03Rik	RIKEN cDNA 4933432I03 gene
chr11	96880209	96880827	619	*	391	-2.4309	5.40849	1.9994e-15	ATAC_Control_PBS_unique	18.2907	98.629	Distal Intergenic	11	96854131	96861203	7073	1	56358	ENSMUST00000147710.1	26078	ENSMUSG00000018672	Copz2	coatomer protein complex, subunit zeta 2
chr2	140793798	140794490	693	*	312	3.2292	4.60837	2.03917e-15	ATAC_KO_PBS_unique	74.6966	7.96553	Intron (ENSMUST00000110067.7/72899, intron 3 of 16)	2	140658198	140671469	13272	2	71436	ENSMUST00000110057.2	-122329	ENSMUSG00000051379	Flrt3	fibronectin leucine rich transmembrane protein 3
chr5	53402483	53403331	849	*	549	1.9976	5.96463	2.64165e-15	ATAC_KO_PBS_unique	124.796	31.251	Distal Intergenic	5	53466152	53649390	183239	1	19664	ENSMUST00000201991.3	-62821	ENSMUSG00000039191	Rbpj	recombination signal binding protein for immunoglobulin kappa J region
chr2	13413285	13414074	790	*	454	2.03716	5.92118	2.72698e-15	merged_common	122.765	29.9109	Intron (ENSMUST00000091436.6/65969, intron 27 of 66)	2	13422029	13455627	33599	2	65969	ENSMUST00000195447.1	41553	ENSMUSG00000026726	Cubn	cubilin (intrinsic factor-cobalamin receptor)
chr15	5446044	5447222	1179	*	538	1.94041	6.05622	3.68147e-15	ATAC_KO_PBS_unique	130.366	33.9659	Distal Intergenic	15	5496266	5594984	98719	1	71432	ENSMUST00000211750.1	-49044	ENSMUSG00000110018	5430437J10Rik	RIKEN cDNA 5430437J10 gene
chr10	76257744	76258522	779	*	457	1.65923	6.48944	4.63879e-15	merged_common	159.682	50.5565	Intron (ENSMUST00000036387.7/20203, intron 2 of 2)	10	76253853	76261159	7307	1	20203	ENSMUST00000036387.7	3891	ENSMUSG00000033208	S100b	S100 protein, beta polypeptide, neural
chr2	148567890	148568386	497	*	195	2.18306	5.70998	4.69726e-15	ATAC_KO_PBS_unique	111.547	24.5636	Distal Intergenic	2	148672601	148676027	3427	1	56488	ENSMUST00000109961.7	-104215	ENSMUSG00000036992	Nxt1	NTF2-related export protein 1
chr14	103007611	103008359	749	*	273	2.13376	5.7608	4.70782e-15	ATAC_KO_PBS_unique	113.589	25.8828	Intron (ENSMUST00000226662.1/71264, intron 2 of 2)	14	102976581	102982637	6057	2	239217	ENSMUST00000184744.1	-24974	ENSMUSG00000098557	Kctd12	potassium channel tetramerisation domain containing 12
chr4	109610340	109610499	160	*	69	3.8275	4.04373	4.88379e-15	ATAC_KO_PBS_unique	62.1413	4.37711	Intron (ENSMUST00000125237.1/ENSMUST00000125237.1, intron 1 of 2)	4	109660876	109665372	4497	2	12580	ENSMUST00000063531.4	54873	ENSMUSG00000028551	Cdkn2c	cyclin dependent kinase inhibitor 2C
chr11	4232319	4233323	1005	*	551	1.89059	6.08684	5.49812e-15	merged_common	130.883	35.2987	Distal Intergenic	11	4236420	4239664	3245	1	18413	ENSMUST00000131764.1	-3097	ENSMUSG00000058755	Osm	oncostatin M
chr16	52470047	52470762	716	*	380	2.26202	5.58496	7.28382e-15	ATAC_KO_PBS_unique	105.126	21.9166	Distal Intergenic	16	52248996	52454074	205079	2	11658	ENSMUST00000023312.13	-15973	ENSMUSG00000022636	Alcam	activated leukocyte cell adhesion molecule
chr5	43081633	43082648	1016	*	408	1.87367	6.13369	7.55766e-15	ATAC_KO_PBS_unique	134.413	36.6783	Distal Intergenic	5	43233170	43289724	56555	1	231207	ENSMUST00000169035.7	-150522	ENSMUSG00000039782	Cpeb2	cytoplasmic polyadenylation element binding protein 2
chr8	24419232	24420249	1018	*	675	1.79804	6.19857	1.01035e-14	merged_common	136.958	39.3843	Distal Intergenic	8	24437180	24438984	1805	2	69068	ENSMUST00000052622.5	18735	ENSMUSG00000056313	Tcim	transcriptional and immune response regulator
chr5	92486706	92487103	398	*	244	2.3115	5.52083	1.16267e-14	ATAC_KO_PBS_unique	102.294	20.6073	Intron (ENSMUST00000031377.8/12492, intron 1 of 11)	5	92441314	92505637	64324	2	12492	ENSMUST00000031377.8	18534	ENSMUSG00000029426	Scarb2	scavenger receptor class B, member 2
chr12	55488025	55489598	1574	*	793	1.24216	7.26261	1.18269e-14	merged_common	236.171	99.8389	3' UTR	12	55490407	55491810	1404	2	18035	ENSMUST00000219869.1	2212	ENSMUSG00000021025	Nfkbia	nuclear factor of kappa light polypeptide gene enhancer in B cells inhibitor, alpha
chr5	17857168	17858043	876	*	327	2.25184	5.5793	1.20441e-14	ATAC_KO_PBS_unique	104.345	21.9079	Intron (ENSMUST00000169095.5/12491, intron 1 of 15)	5	17781690	17849792	68103	2	12491	ENSMUST00000170051.7	-7376	ENSMUSG00000002944	Cd36	CD36 molecule
chr2	136936370	136937511	1142	*	735	1.9553	5.94113	1.72553e-14	ATAC_KO_PBS_unique	120.993	31.2001	Intron (ENSMUST00000028737.12/74243, intron 2 of 5)	2	136905543	137069778	164236	1	74243	ENSMUST00000180277.2	30827	ENSMUSG00000027281	Slx4ip	SLX4 interacting protein
chr7	135913830	135914692	863	*	542	2.50881	5.20044	2.01298e-14	ATAC_KO_PBS_unique	87.7207	15.4126	Distal Intergenic	7	135689784	135716361	26578	2	17345	ENSMUST00000033310.8	-197469	ENSMUSG00000031004	Mki67	antigen identified by monoclonal antibody Ki 67
chr17	48300128	48301364	1237	*	890	1.85872	6.06914	2.15116e-14	ATAC_KO_PBS_unique	127.867	35.2556	Promoter	17	48300355	48306566	6212	1	328833	ENSMUST00000233602.1	0	ENSMUSG00000071068	Treml2	triggering receptor expressed on myeloid cells-like 2
chr3	50320873	50321459	587	*	256	2.68343	5.02967	2.54728e-14	ATAC_KO_PBS_unique	82.79	12.888	Intron (ENSMUST00000194462.5/26570, intron 11 of 11)	3	50364938	50443611	78674	2	26570	ENSMUST00000029297.5	122152	ENSMUSG00000027737	Slc7a11	solute carrier family 7 (cationic amino acid transporter, y+ system), member 11
chr9	42141462	42142206	745	*	280	2.30986	5.42275	2.91874e-14	ATAC_KO_PBS_unique	95.5166	19.2638	Exon (ENSMUST00000217076.1/ENSMUST00000217076.1, exon 1 of 2)	9	41964720	42124297	159578	2	20660	ENSMUST00000060989.8	-17165	ENSMUSG00000049313	Sorl1	sortilin-related receptor, LDLR class A repeats-containing
chr5	36997932	36998437	506	*	331	2.5849	5.11441	2.99773e-14	ATAC_KO_PBS_unique	84.851	14.1425	Distal Intergenic	5	36966104	36989205	23102	2	22393	ENSMUST00000043964.12	-8727	ENSMUSG00000039474	Wfs1	wolframin ER transmembrane glycoprotein
chr15	6411178	6411885	708	*	331	3.00193	4.69616	3.03009e-14	ATAC_KO_PBS_unique	73.3703	9.15903	Intron (ENSMUST00000159552.1/13132, intron 1 of 5)	15	6422240	6438907	16668	1	13132	ENSMUST00000163082.1	-10355	ENSMUSG00000022150	Dab2	disabled 2, mitogen-responsive phosphoprotein
chr5	53451689	53452233	545	*	298	2.14458	5.68861	3.32374e-14	ATAC_KO_PBS_unique	108.451	24.5274	Distal Intergenic	5	53466152	53649390	183239	1	19664	ENSMUST00000201991.3	-13919	ENSMUSG00000039191	Rbpj	recombination signal binding protein for immunoglobulin kappa J region
chr16	24891305	24892058	754	*	371	1.88377	6.02475	3.62741e-14	ATAC_KO_PBS_unique	125.074	33.8918	Intron (ENSMUST00000038053.13/210126, intron 10 of 12)	16	24845175	24979450	134276	1	210126	ENSMUST00000232546.1	46130	ENSMUSG00000033306	Lpp	LIM domain containing preferred translocation partner in lipoma
chr8	27260003	27261792	1790	*	1268	1.32295	7.01963	3.88833e-14	merged_common	205.231	82.0343	Promoter	8	27260329	27276674	16346	1	13685	ENSMUST00000033880.6	0	ENSMUSG00000031490	Eif4ebp1	eukaryotic translation initiation factor 4E binding protein 1
chr14	45049164	45050792	1629	*	854	0.97021	7.89482	3.92944e-14	merged_common	333.126	170.038	Distal Intergenic	14	44958607	44989699	31093	2	73895	ENSMUST00000226133.1	-59465	ENSMUSG00000075042	4930431P03Rik	RIKEN cDNA 4930431P03 gene
chr15	100040301	100041242	942	*	746	-1.70726	6.28136	3.96246e-14	merged_common	43.0437	140.555	Intron (ENSMUST00000100203.9/239667, intron 1 of 37)	15	100038664	100219473	180810	1	239667	ENSMUST00000100203.9	1637	ENSMUSG00000023026	Dip2b	disco interacting protein 2 homolog B
chr4	80310508	80311602	1095	*	758	1.66123	6.36226	4.3735e-14	merged_common	146.309	46.2585	Distal Intergenic	4	80834123	80837684	3562	1	22178	ENSMUST00000133655.7	-522521	ENSMUSG00000005994	Tyrp1	tyrosinase-related protein 1
chr1	105965114	105965673	560	*	244	2.29852	5.41645	4.87302e-14	ATAC_KO_PBS_unique	94.7274	19.2554	Distal Intergenic	1	105979350	105990282	10933	2	635504	ENSMUST00000185535.1	24609	NA	Gm7160	predicted gene 7160
chr1	106695644	106696125	482	*	269	1.9894	5.82642	5.00486e-14	merged_common	113.074	28.4769	Intron (ENSMUST00000112751.1/12043, intron 1 of 1)	1	106710339	106713179	2841	2	12043	ENSMUST00000189999.1	17054	ENSMUSG00000057329	Bcl2	B cell leukemia/lymphoma 2
chr3	36475047	36476172	1126	*	796	1.35016	6.95391	5.11659e-14	merged_common	197.95	77.6455	Promoter	3	36475461	36475524	64	2	102466786	ENSMUST00000184519.1	0	ENSMUSG00000098808	Mir7009	microRNA 7009
chr17	44709661	44710584	924	*	355	2.26892	5.49718	5.27736e-14	ATAC_KO_PBS_unique	99.1568	20.5736	Exon (ENSMUST00000161664.1/ENSMUST00000161664.1, exon 1 of 2)	17	44639681	44734693	95013	2	12393	ENSMUST00000160199.1	24109	ENSMUSG00000039153	Runx2	runt related transcription factor 2
chr3	54248127	54248964	838	*	551	2.07689	5.7292	5.30402e-14	ATAC_KO_PBS_unique	108.959	25.826	Intron (ENSMUST00000029311.10/22066, intron 3 of 10)	3	54156615	54318416	161802	1	22066	ENSMUST00000200341.1	91512	ENSMUSG00000027748	Trpc4	transient receptor potential cation channel, subfamily C, member 4
chr8	57801008	57801710	703	*	329	2.15577	5.6126	5.44603e-14	ATAC_KO_PBS_unique	103.285	23.1785	Intron (ENSMUST00000204128.2/270049, intron 11 of 12)	8	57776225	57796590	20366	2	270049	ENSMUST00000204067.2	-4418	ENSMUSG00000096914	Galntl6	UDP-N-acetyl-alpha-D-galactosamine:polypeptide N-acetylgalactosaminyltransferase-like 6
chr17	64753645	64754806	1162	*	650	1.48224	6.65573	5.50361e-14	merged_common	168.529	60.3219	3' UTR	17	64767111	64767931	821	1	101202683	ENSMUST00000233348.1	-12305	ENSMUSG00000117105	Dreh	down-regulated in hepatocellular carcinoma
chr16	11282476	11283720	1245	*	464	-1.20348	7.2684	6.36694e-14	merged_common	101.593	233.964	Distal Intergenic	16	11254368	11254445	78	2	100316833	ENSMUST00000157919.1	-28031	ENSMUSG00000088544	Mir1945	microRNA 1945
chr9	90242830	90243436	607	*	228	1.92044	5.92176	6.92812e-14	ATAC_KO_PBS_unique	117.946	31.1582	Intron (ENSMUST00000041767.13/67016, intron 2 of 12)	9	90241163	90255927	14765	2	67016	ENSMUST00000144646.2	12491	ENSMUSG00000037410	Tbc1d2b	TBC1 domain family, member 2B
chr5	142920671	142921424	754	*	243	1.81907	6.10335	7.0295e-14	merged_common	129.148	36.6011	Distal Intergenic	5	142903115	142906754	3640	2	11461	ENSMUST00000100497.10	-13917	ENSMUSG00000029580	Actb	actin, beta
chr10	111127133	111127978	846	*	509	2.42814	5.27441	7.15206e-14	ATAC_KO_PBS_unique	89.7898	16.6834	Distal Intergenic	10	111164752	111297249	132498	1	237542	ENSMUST00000105275.8	-36774	ENSMUSG00000020189	Osbpl8	oxysterol binding protein-like 8
chr5	36538628	36539189	562	*	380	1.95844	5.87744	7.31762e-14	ATAC_KO_PBS_unique	115.894	29.8202	Intron (ENSMUST00000146430.7/100855, intron 3 of 13)	5	36490608	36531602	40995	2	100855	ENSMUST00000126077.7	-7026	ENSMUSG00000029192	Tbc1d14	TBC1 domain family, member 14
chr16	15956360	15956843	484	*	183	2.35456	5.34413	7.68214e-14	ATAC_KO_PBS_unique	91.8629	17.9617	Intron (ENSMUST00000040248.8/224008, intron 10 of 19)	16	15887286	15891031	3746	1	12609	ENSMUST00000096232.5	69074	ENSMUSG00000071637	Cebpd	CCAAT/enhancer binding protein (C/EBP), delta
chr5	20680947	20681788	842	*	386	2.08464	5.65531	8.86726e-14	ATAC_KO_PBS_unique	103.798	24.4708	Intron (ENSMUST00000197354.4/50791, intron 21 of 21)	5	20701669	20702803	1135	1	50791	ENSMUST00000197307.1	-19881	ENSMUSG00000040003	Magi2	membrane associated guanylate kinase, WW and PDZ domain containing 2
chr13	37056414	37057339	926	*	474	1.52297	6.57026	9.56437e-14	merged_common	161.092	56.0551	Distal Intergenic	13	36867178	37050244	183067	2	74145	ENSMUST00000164727.7	-6170	ENSMUSG00000039109	F13a1	coagulation factor XIII, A1 subunit
chr1	163283877	163284668	792	*	541	1.54812	6.50788	9.58865e-14	merged_common	155.626	53.2172	Exon (ENSMUST00000174098.1/18933, exon 2 of 2)	1	163247577	163289224	41648	2	18933	ENSMUST00000183691.2	4556	ENSMUSG00000026586	Prrx1	paired related homeobox 1
chr17	73095109	73095606	498	*	139	2.4708	5.17933	9.99244e-14	ATAC_KO_PBS_unique	85.3152	15.3901	Distal Intergenic	17	73107985	73161991	54007	1	225010	ENSMUST00000130574.3	-12379	ENSMUSG00000054469	Lclat1	lysocardiolipin acyltransferase 1
chr14	47920603	47921247	645	*	174	1.87575	5.9598	1.03021e-13	ATAC_KO_PBS_unique	119.236	32.49	Intron (ENSMUST00000227343.1/73961, intron 2 of 3)	14	47898853	47944189	45337	1	73961	ENSMUST00000227343.1	21750	ENSMUSG00000115609	4930447J18Rik	RIKEN cDNA 4930447J18 gene
chr1	92216217	92216590	374	*	220	2.75176	4.91486	1.10626e-13	ATAC_KO_PBS_unique	78.2891	11.6236	Distal Intergenic	1	92030144	92195699	165556	2	208727	ENSMUST00000212408.1	-20518	ENSMUSG00000026313	Hdac4	histone deacetylase 4
chr5	62677395	62677967	573	*	221	2.41594	5.26764	1.20315e-13	ATAC_KO_PBS_unique	88.9924	16.6756	Exon (ENSMUST00000076623.7/212285, exon 12 of 33)	5	62677258	62683561	6304	2	212285	ENSMUST00000201373.1	5594	ENSMUSG00000037999	Arap2	ArfGAP with RhoGAP domain, ankyrin repeat and PH domain 2
chr13	107596238	107596633	396	*	99	3.10085	4.53707	1.24778e-13	ATAC_KO_PBS_unique	68.0015	7.92629	Distal Intergenic	13	107687397	107692162	4766	1	72257	ENSMUST00000188960.6	-90764	ENSMUSG00000102000	1700006H21Rik	RIKEN cDNA 1700006H21 gene
chr2	148491978	148492757	780	*	401	1.40377	6.77753	1.34026e-13	merged_common	178.455	67.4453	Distal Intergenic	2	148436640	148443563	6924	2	17064	ENSMUST00000099269.3	-48415	ENSMUSG00000027435	Cd93	CD93 antigen
chr8	128491095	128492008	914	*	339	2.12448	5.59522	1.4531e-13	ATAC_KO_PBS_unique	100.947	23.1506	Intron (ENSMUST00000026917.9/18186, intron 12 of 16)	8	128359397	128462081	102685	1	18186	ENSMUST00000212933.1	131698	ENSMUSG00000025810	Nrp1	neuropilin 1
chr18	46474679	46475074	396	*	291	2.54535	5.09244	1.51017e-13	ATAC_KO_PBS_unique	82.431	14.121	Distal Intergenic	18	46465215	46465790	576	2	72076	ENSMUST00000180618.1	-8889	NA	Mospd4	motile sperm domain containing 4
chr14	31165841	31166851	1011	*	376	1.53534	6.53941	1.62758e-13	merged_common	158.362	54.6345	Intron (ENSMUST00000036618.13/192187, intron 1 of 68)	14	31158510	31168595	10086	2	192187	ENSMUST00000159532.1	1744	ENSMUSG00000042286	Stab1	stabilin 1
chr18	15201369	15202121	753	*	292	1.56133	6.47564	1.63337e-13	merged_common	152.885	51.8034	Exon (ENSMUST00000234417.1/ENSMUST00000234417.1, exon 2 of 2)	18	14968685	15151446	182762	2	106931	ENSMUST00000025992.6	-49923	ENSMUSG00000036225	Kctd1	potassium channel tetramerisation domain containing 1
chr16	11144059	11144358	300	*	177	-1.19425	7.23558	1.73012e-13	merged_common	99.6263	227.971	Exon (ENSMUST00000102303.1/ENSMUST00000102303.1, exon 1 of 1)	16	11139043	11141907	2865	2	106205	ENSMUST00000143121.1	-2152	ENSMUSG00000037965	Zc3h7a	zinc finger CCCH type containing 7 A
chr5	21131187	21132246	1060	*	170	2.06403	5.64386	2.33725e-13	merged_common	102.244	24.4514	Exon (ENSMUST00000197733.1/ENSMUST00000197733.1, exon 1 of 1)	5	21186255	21259766	73512	1	212167	ENSMUST00000197522.4	-54009	ENSMUSG00000039934	Gsap	gamma-secretase activating protein
chr18	56737279	56737869	591	*	315	2.16735	5.53237	2.37481e-13	ATAC_KO_PBS_unique	98.0907	21.8369	Intron (ENSMUST00000025486.8/16906, intron 5 of 10)	18	56728441	56733456	5016	1	16906	ENSMUST00000128651.1	8838	ENSMUSG00000024590	Lmnb1	lamin B1
chr18	5133991	5134751	761	*	436	1.84933	5.94513	2.55474e-13	merged_common	116.954	32.4572	Distal Intergenic	18	5114253	5119218	4966	1	225115	ENSMUST00000129543.1	19738	ENSMUSG00000024236	Svil	supervillin
chr11	106961399	106962061	663	*	164	2.5183	5.07741	2.57988e-13	ATAC_KO_PBS_unique	80.8155	14.1062	Distal Intergenic	11	106991618	106992627	1010	2	16647	ENSMUST00000156495.1	30566	ENSMUSG00000018362	Kpna2	karyopherin (importin) alpha 2
chr18	50082612	50083726	1115	*	484	1.46925	6.61328	2.99032e-13	merged_common	162.907	58.8371	Intron (ENSMUST00000148989.2/106869, intron 1 of 1)	18	50052299	50053844	1546	2	102635912	ENSMUST00000153361.1	-28768	NA	C030005K06Rik	RIKEN cDNA C030005K06 gene
chr8	89040599	89044421	3823	*	2356	-0.87288	8.0736	2.99619e-13	merged_common	199.074	364.567	Promoter	8	89027235	89044162	16928	2	58198	ENSMUST00000034090.7	0	ENSMUSG00000031665	Sall1	spalt like transcription factor 1
chr1	164135223	164135923	701	*	247	1.94218	5.80019	3.26801e-13	ATAC_KO_PBS_unique	109.234	28.4252	Intron (ENSMUST00000162746.1/20344, intron 8 of 15)	1	164141318	164142792	1475	1	20344	ENSMUST00000160000.1	-5395	ENSMUSG00000026580	Selp	selectin, platelet
chr10	111539700	111540491	792	*	509	1.94218	5.80019	3.26801e-13	ATAC_KO_PBS_unique	109.234	28.4252	Distal Intergenic	10	111507696	111508165	470	1	21664	ENSMUST00000186359.1	32004	ENSMUSG00000020205	Phlda1	pleckstrin homology like domain, family A, member 1
chr14	45667148	45667731	584	*	321	2.70824	4.89068	3.31796e-13	ATAC_KO_PBS_unique	75.8354	11.6041	Exon (ENSMUST00000228352.1/ENSMUST00000228352.1, exon 1 of 2)	14	45593174	45658143	64970	2	114874	ENSMUST00000051310.12	-9005	ENSMUSG00000037697	Ddhd1	DDHD domain containing 1
chr1	24613004	24613230	227	*	147	0.55537	9.36121	3.36406e-13	merged_common	797.254	542.517	Exon (ENSMUST00000188299.1/ENSMUST00000188299.1, exon 1 of 1)	1	24263994	24587472	323479	2	12823	ENSMUST00000115244.8	-25532	ENSMUSG00000026141	Col19a1	collagen, type XIX, alpha 1
chr13	90515699	90516450	752	*	382	1.2983	6.95251	3.71427e-13	merged_common	194.235	78.977	Distal Intergenic	13	90883453	90898824	15372	2	435376	ENSMUST00000182104.1	382374	ENSMUSG00000078958	Atp6ap1l	ATPase, H+ transporting, lysosomal accessory protein 1-like
chr2	113655960	113656673	714	*	141	2.14534	5.52014	3.87886e-13	ATAC_KO_PBS_unique	96.5236	21.8183	Intron (ENSMUST00000099576.8/14260, intron 15 of 18)	2	113685090	113693151	8062	1	14260	ENSMUST00000150510.7	-28417	ENSMUSG00000044042	Fmn1	formin 1
chr10	25128274	25128877	604	*	317	2.14534	5.52014	3.87886e-13	ATAC_KO_PBS_unique	96.5236	21.8183	Distal Intergenic	10	25169090	25200158	31069	2	432442	ENSMUST00000100012.2	71281	ENSMUSG00000039166	Akap7	A kinase (PRKA) anchor protein 7
chr1	150164751	150165279	529	*	356	1.77037	6.0763	4.05878e-13	merged_common	124.628	36.5327	Promoter	1	150159043	150164948	5906	2	102639566	ENSMUST00000181308.1	0	ENSMUSG00000097754	Ptgs2os2	prostaglandin-endoperoxide synthase 2, opposite strand 2
chr5	43050967	43051619	653	*	136	2.41833	5.15018	4.88289e-13	ATAC_KO_PBS_unique	82.102	15.359	Distal Intergenic	5	43233170	43289724	56555	1	231207	ENSMUST00000169035.7	-181551	ENSMUSG00000039782	Cpeb2	cytoplasmic polyadenylation element binding protein 2
chr8	10910561	10911654	1094	*	625	2.29415	5.31057	5.94891e-13	ATAC_KO_PBS_unique	87.8911	17.92	Distal Intergenic	8	10899937	10903893	3957	1	71624	ENSMUST00000207914.1	10624	ENSMUSG00000109089	4833411C07Rik	RIKEN cDNA 4833411C07 gene
chr17	75119333	75119816	484	*	332	2.29415	5.31057	5.94891e-13	ATAC_KO_PBS_unique	87.8911	17.92	Intron (ENSMUST00000234490.1/268977, intron 3 of 34)	17	75178810	75348933	170124	1	268977	ENSMUST00000135447.7	-58994	ENSMUSG00000001870	Ltbp1	latent transforming growth factor beta binding protein 1
chr10	68377835	68378712	878	*	480	1.62029	6.29436	5.96862e-13	merged_common	137.616	44.7624	Distal Intergenic	10	68319071	68321142	2072	2	75148	ENSMUST00000218225.1	-56693	ENSMUSG00000112157	4930545H06Rik	RIKEN cDNA 4930545H06 gene
chr3	135516841	135517376	536	*	163	2.20232	5.46018	6.33783e-13	ATAC_KO_PBS_unique	94.4409	20.5209	Promoter	3	135517150	135542327	25178	1	110173	ENSMUST00000123061.1	0	ENSMUSG00000028164	Manba	mannosidase, beta A, lysosomal
chr17	64723047	64723797	751	*	303	2.19088	5.45382	6.33783e-13	ATAC_KO_PBS_unique	93.6534	20.5118	Intron (ENSMUST00000086723.9/17158, intron 16 of 21)	17	64713619	64754838	41220	1	17158	ENSMUST00000169668.1	9428	ENSMUSG00000024085	Man2a1	mannosidase 2, alpha 1
chr12	30606628	30607085	458	*	305	2.7678	4.75489	6.80973e-13	ATAC_KO_PBS_unique	70.4628	10.3459	Distal Intergenic	12	30586914	30588978	2065	1	211986	ENSMUST00000218826.1	19714	ENSMUSG00000043061	Tmem18	transmembrane protein 18
chr4	109609840	109610110	271	*	127	3.03158	4.49859	7.1162e-13	ATAC_KO_PBS_unique	64.6411	7.90519	Intron (ENSMUST00000125237.1/ENSMUST00000125237.1, intron 1 of 2)	4	109660876	109665372	4497	2	12580	ENSMUST00000063531.4	55262	ENSMUSG00000028551	Cdkn2c	cyclin dependent kinase inhibitor 2C
chr3	144897069	144897808	740	*	311	1.89374	5.8415	7.28063e-13	ATAC_KO_PBS_unique	110.536	29.7461	Distal Intergenic	3	144879322	144896011	16690	2	622139	ENSMUST00000098551.5	-1058	ENSMUSG00000074196	Clca4c-ps	chloride channel accessory 4C, pseudogene
chr2	11530021	11530526	506	*	253	2.49067	5.06206	7.48828e-13	ATAC_KO_PBS_unique	79.1982	14.0912	Exon (ENSMUST00000192087.1/ENSMUST00000192087.1, exon 3 of 3)	2	11471826	11553922	82097	2	170768	ENSMUST00000195779.5	23396	ENSMUSG00000026773	Pfkfb3	6-phosphofructo-2-kinase/fructose-2,6-biphosphatase 3
chr6	95359851	95361100	1250	*	494	1.40882	6.68316	7.54188e-13	merged_common	167.448	63.0642	Distal Intergenic	6	95290577	95333993	43417	2	414067	ENSMUST00000159937.7	-25858	ENSMUSG00000068180	AY512915	cDNA sequence AY512915
chr15	25354485	25355647	1163	*	487	1.2969	6.89645	8.59524e-13	merged_common	186.742	76.0038	Distal Intergenic	15	25364857	25413698	48842	2	70350	ENSMUST00000228597.1	58051	ENSMUSG00000045763	Basp1	brain abundant, membrane attached signal protein 1
chr5	125273623	125274197	575	*	392	1.95368	5.73533	8.7213e-13	ATAC_KO_PBS_unique	104.849	27.0675	Downstream (2-3kb)	5	125277787	125284159	6373	2	20778	ENSMUST00000124582.1	9962	ENSMUSG00000037936	Scarb1	scavenger receptor class B, member 1
chr3	84678649	84679419	771	*	338	2.0706	5.56529	1.01188e-12	ATAC_KO_PBS_unique	97.0455	23.1027	Intron (ENSMUST00000107682.1/320782, intron 1 of 6)	3	84690223	84692544	2322	1	320782	ENSMUST00000128344.1	-10804	ENSMUSG00000056498	Tmem154	transmembrane protein 154
chr16	49839710	49840943	1234	*	542	1.50232	6.48244	1.03513e-12	merged_common	150.498	53.1236	Intron (ENSMUST00000229640.1/16423, intron 4 of 12)	16	49855366	49911091	55726	1	16423	ENSMUST00000114496.2	-14423	ENSMUSG00000055447	Cd47	CD47 antigen (Rh-related antigen, integrin-associated signal transducer)
chr17	64720691	64721471	781	*	540	1.88422	5.83621	1.14631e-12	ATAC_KO_PBS_unique	109.768	29.7352	Intron (ENSMUST00000086723.9/17158, intron 16 of 21)	17	64713619	64754838	41220	1	17158	ENSMUST00000169668.1	7072	ENSMUSG00000024085	Man2a1	mannosidase 2, alpha 1
chr3	148220640	148221411	772	*	416	1.54751	6.38574	1.20608e-12	merged_common	142.963	48.9075	Distal Intergenic	3	148815856	148822979	7124	2	99633	ENSMUST00000168352.1	601568	ENSMUSG00000028184	Adgrl2	adhesion G protein-coupled receptor L2
chr6	134171773	134172837	1065	*	521	1.60545	6.28611	1.35523e-12	merged_common	136.129	44.7366	Exon (ENSMUST00000164616.1/ENSMUST00000164616.1, exon 1 of 2)	6	134233600	134262019	28420	1	14011	ENSMUST00000169529.1	-60763	ENSMUSG00000030199	Etv6	ets variant 6
chr1	128614320	128615368	1049	*	695	1.80409	5.92	1.53672e-12	ATAC_KO_PBS_unique	113.146	32.4007	Distal Intergenic	1	128589099	128592293	3195	2	12767	ENSMUST00000142893.1	-22027	ENSMUSG00000045382	Cxcr4	chemokine (C-X-C motif) receptor 4
chr5	86540631	86541490	860	*	465	1.52032	6.41228	1.56799e-12	merged_common	144.251	50.2872	Intron (ENSMUST00000116553.8/243083, intron 4 of 10)	5	86485876	86518600	32725	2	320454	ENSMUST00000134179.7	-22031	ENSMUSG00000079451	Tmprss11g	transmembrane protease, serine 11g
chr14	60749785	60750357	573	*	340	2.01102	5.61441	1.58773e-12	ATAC_KO_PBS_unique	98.3546	24.4015	Promoter	14	60751077	60762666	11590	1	219140	ENSMUST00000162939.1	-720	ENSMUSG00000021990	Spata13	spermatogenesis associated 13
chr5	88630726	88631317	592	*	332	1.38499	6.66993	1.58782e-12	merged_common	164.555	63.0068	Intron (ENSMUST00000196894.4/52822, intron 8 of 12)	5	88646691	88648318	1628	1	52822	ENSMUST00000199956.1	-15374	ENSMUSG00000029291	Rufy3	RUN and FYVE domain containing 3
chr7	117481226	117481935	710	*	403	2.05954	5.55915	1.63587e-12	ATAC_KO_PBS_unique	96.2637	23.0929	Intron (ENSMUST00000160035.7/233781, intron 2 of 6)	7	117475492	117549359	73868	1	233781	ENSMUST00000161889.1	5734	ENSMUSG00000030657	Xylt1	xylosyltransferase 1
chr4	33581776	33582416	641	*	321	2.25651	5.28966	1.63683e-12	ATAC_KO_PBS_unique	85.5037	17.894	Distal Intergenic	4	33438081	33438209	129	1	102465904	ENSMUST00000183962.1	143695	ENSMUSG00000098310	Mir8118	microRNA 8118
chr3	152402346	152402704	359	*	113	2.11161	5.50141	1.67088e-12	ATAC_KO_PBS_unique	94.1713	21.7902	Intron (ENSMUST00000106103.7/108946, intron 1 of 12)	3	152396694	152462826	66133	1	108946	ENSMUST00000106101.1	5652	ENSMUSG00000039068	Zzz3	zinc finger, ZZ domain containing 3
chr4	150076021	150076694	674	*	318	2.13211	5.42118	1.6925e-12	ATAC_KO_PBS_unique	89.7124	20.4655	Distal Intergenic	4	150068539	150070997	2459	1	723848	ENSMUST00000194216.1	7482	ENSMUSG00000065493	Mir34a	microRNA 34a
chr6	17409700	17410216	517	*	212	2.13211	5.42118	1.6925e-12	ATAC_KO_PBS_unique	89.7124	20.4655	Distal Intergenic	6	17463800	17573980	110181	1	17295	ENSMUST00000115443.7	-53584	ENSMUSG00000009376	Met	met proto-oncogene
chr7	25709273	25712244	2972	*	963	-1.36206	6.7409	1.77363e-12	merged_common	66.7118	171.484	3' UTR	7	25712935	25716106	3172	2	52132	ENSMUST00000134201.1	3862	ENSMUSG00000002608	Ccdc97	coiled-coil domain containing 97
chr3	61409579	61410171	593	*	263	2.54215	4.95119	1.93973e-12	ATAC_KO_PBS_unique	74.6601	12.8181	Distal Intergenic	3	61361638	61368430	6793	1	74012	ENSMUST00000049064.3	47941	ENSMUSG00000036894	Rap2b	RAP2B, member of RAS oncogene family
chr5	147742362	147743029	668	*	318	2.55699	4.95943	1.93973e-12	ATAC_KO_PBS_unique	75.4749	12.8254	Distal Intergenic	5	147561604	147726011	164408	2	14254	ENSMUST00000031653.11	-16351	ENSMUSG00000029648	Flt1	FMS-like tyrosine kinase 1
chr16	52452642	52453734	1093	*	566	1.30035	6.84111	1.99009e-12	merged_common	179.929	73.0562	Promoter	16	52305264	52452654	147391	2	11658	ENSMUST00000168071.1	0	ENSMUSG00000022636	Alcam	activated leukocyte cell adhesion molecule
chr3	51209798	51210382	585	*	221	2.7188	4.72766	2.08171e-12	ATAC_KO_PBS_unique	67.981	10.3264	Distal Intergenic	3	51224447	51251644	27198	1	12457	ENSMUST00000023849.14	-14065	ENSMUSG00000023087	Noct	nocturnin
chr16	55754319	55754781	463	*	268	2.7188	4.72766	2.08171e-12	ATAC_KO_PBS_unique	67.981	10.3264	Distal Intergenic	16	55811375	55822138	10764	2	80859	ENSMUST00000114458.7	67357	ENSMUSG00000035356	Nfkbiz	nuclear factor of kappa light polypeptide gene enhancer in B cells inhibitor, zeta
chr16	73647239	73648137	899	*	401	1.45311	6.53144	2.14679e-12	merged_common	153.064	55.9042	Distal Intergenic	16	73894664	73899885	5222	2	268902	ENSMUST00000149114.1	251748	ENSMUSG00000052516	Robo2	roundabout guidance receptor 2
chr6	122570768	122571620	853	*	368	1.92313	5.71836	2.20302e-12	ATAC_KO_PBS_unique	102.532	27.0357	Exon (ENSMUST00000162980.1/ENSMUST00000162980.1, exon 1 of 2)	6	122560485	122563076	2592	1	11628	ENSMUST00000160685.1	10283	ENSMUSG00000040627	Aicda	activation-induced cytidine deaminase
chr2	152805859	152806823	965	*	416	1.9892	5.60229	2.55077e-12	ATAC_KO_PBS_unique	96.797	24.3811	Intron (ENSMUST00000007803.11/12048, intron 2 of 2)	2	152781411	152828535	47125	2	12048	ENSMUST00000173755.1	21712	ENSMUSG00000007659	Bcl2l1	BCL2-like 1
chr4	139493625	139494149	525	*	221	1.9892	5.60229	2.55077e-12	ATAC_KO_PBS_unique	96.797	24.3811	Distal Intergenic	4	139480380	139482682	2303	1	69116	ENSMUST00000135534.1	13245	ENSMUSG00000066036	Ubr4	ubiquitin protein ligase E3 component n-recognin 4
chr16	16073147	16074074	928	*	382	1.56075	6.30643	2.68099e-12	merged_common	135.938	46.0796	Intron (ENSMUST00000040248.8/224008, intron 5 of 19)	16	15893385	16146804	253420	2	224008	ENSMUST00000229846.1	72730	ENSMUSG00000041974	Spidr	scaffolding protein involved in DNA repair
chr16	24892165	24892255	91	*	13	2.17931	5.35022	2.75528e-12	ATAC_KO_PBS_unique	86.8152	19.1672	Intron (ENSMUST00000038053.13/210126, intron 10 of 12)	16	24845175	24979450	134276	1	210126	ENSMUST00000232546.1	46990	ENSMUSG00000033306	Lpp	LIM domain containing preferred translocation partner in lipoma
chr19	21031491	21032765	1275	*	640	1.2196	6.98828	3.0322e-12	merged_common	193.754	83.1982	Distal Intergenic	19	20783458	20954202	170745	2	13409	ENSMUST00000039500.3	-77289	ENSMUSG00000024749	Tmc1	transmembrane channel-like gene family 1
chr13	56352479	56354000	1522	*	851	1.91278	5.71261	3.49094e-12	ATAC_KO_PBS_unique	101.758	27.025	Distal Intergenic	13	56362900	56368857	5958	1	100038494	ENSMUST00000223775.1	-8900	ENSMUSG00000074885	Gm10782	predicted gene 10782
chrY	90740923	90744823	3901	*	249	-1.17549	7.08457	3.52028e-12	merged_common	90.3107	203.984	Distal Intergenic	21	90784738	90816439	31702	1	170942	ENSMUST00000179483.7	-39915	ENSMUSG00000096768	Erdr1	erythroid differentiation regulator 1
chr10	37194203	37195562	1360	*	1038	1.39098	6.60503	3.64855e-12	merged_common	157.643	60.1103	Distal Intergenic	10	37133375	37138920	5546	2	17118	ENSMUST00000092584.5	-55283	ENSMUSG00000069662	Marcks	myristoylated alanine rich protein kinase C substrate
chr4	35130341	35131145	805	*	528	2.43358	5.03035	3.65067e-12	ATAC_KO_PBS_unique	75.9585	14.0603	Intron (ENSMUST00000102975.9/214944, intron 1 of 3)	4	35152056	35154005	1950	1	387510	ENSMUST00000058595.6	-20911	ENSMUSG00000042993	Ifnk	interferon kappa
chr8	128435675	128436402	728	*	210	2.43358	5.03035	3.65067e-12	ATAC_KO_PBS_unique	75.9585	14.0603	Intron (ENSMUST00000026917.9/18186, intron 6 of 16)	8	128359397	128462081	102685	1	18186	ENSMUST00000212933.1	76278	ENSMUSG00000025810	Nrp1	neuropilin 1
chr9	56496025	56496395	371	*	162	-3.16425	4.23989	3.68333e-12	ATAC_Control_PBS_unique	6.31055	56.572	3' UTR	9	56418830	56476117	57288	1	66867	ENSMUST00000214869.1	77195	ENSMUSG00000032329	Hmg20a	high mobility group 20A
chr9	94362372	94363144	773	*	328	1.96566	5.66742	3.70437e-12	ATAC_KO_PBS_unique	100.444	25.7159	Distal Intergenic	9	94517864	94538081	20218	2	68861	ENSMUST00000113028.1	174937	ENSMUSG00000045414	Dipk2a	divergent protein kinase domain 2A
chr19	23056734	23057604	871	*	341	1.95506	5.66153	3.70437e-12	ATAC_KO_PBS_unique	99.6681	25.7054	Intron (ENSMUST00000181623.1/ENSMUST00000181623.1, intron 5 of 6)	19	23141226	23166911	25686	1	16601	ENSMUST00000036884.1	-83622	ENSMUSG00000033863	Klf9	Kruppel-like factor 9
chr2	126466467	126467002	536	*	393	2.97709	4.46832	3.99814e-12	ATAC_KO_PBS_unique	62.1148	7.88863	Intron (ENSMUST00000040128.11/241633, intron 3 of 27)	2	126371539	126491553	120015	2	241633	ENSMUST00000134977.7	24551	ENSMUSG00000060131	Atp8b4	ATPase, class I, type 8B, member 4
chr13	52985431	52986534	1104	*	191	2.30073	5.20363	4.35421e-12	ATAC_KO_PBS_unique	81.7981	16.6018	Distal Intergenic	13	52967209	52981073	13865	2	18030	ENSMUST00000071065.7	-4358	ENSMUSG00000056749	Nfil3	nuclear factor, interleukin 3, regulated
chr1	84406924	84407563	640	*	199	2.07699	5.48217	4.37987e-12	ATAC_KO_PBS_unique	91.8154	21.761	Intron (ENSMUST00000049126.12/227325, intron 9 of 12)	1	84107794	84364180	256387	2	98496	ENSMUST00000175996.7	-42744	ENSMUSG00000045658	Pid1	phosphotyrosine interaction domain containing 1
chr10	59236030	59236987	958	*	600	1.60603	6.19212	4.47522e-12	merged_common	127.569	41.9066	Distal Intergenic	10	59221953	59226434	4482	1	268301	ENSMUST00000182161.1	14077	ENSMUSG00000098188	Sowahc	sosondowah ankyrin repeat domain family member C
chr9	96391688	96392440	753	*	454	2.16677	5.34325	4.52282e-12	ATAC_KO_PBS_unique	86.0221	19.1579	Distal Intergenic	9	96332655	96364442	31788	2	11933	ENSMUST00000034983.6	-27246	ENSMUSG00000032412	Atp1b3	ATPase, Na+/K+ transporting, beta 3 polypeptide
chr7	19227240	19229303	2064	*	1301	-0.68845	8.58383	4.53827e-12	merged_common	302.251	487.094	Promoter	7	19228334	19247868	19535	1	403187	ENSMUST00000063976.8	0	ENSMUSG00000052214	Opa3	optic atrophy 3
chr19	32181179	32182348	1170	*	269	1.57525	6.26934	4.57377e-12	merged_common	133.155	44.6849	Intron (ENSMUST00000099514.9/208449, intron 5 of 9)	19	32160061	32196428	36368	2	208449	ENSMUST00000151822.1	14080	ENSMUSG00000040451	Sgms1	sphingomyelin synthase 1
chr13	117242098	117242465	368	*	87	3.91046	3.62869	4.62408e-12	ATAC_KO_PBS_unique	47.9653	3.18979	Intron (ENSMUST00000225981.1/13723, intron 3 of 3)	13	117220744	117226070	5327	1	13723	ENSMUST00000225460.1	21354	ENSMUSG00000021728	Emb	embigin
chr10	17518459	17519039	581	*	125	2.61654	4.83974	5.00708e-12	ATAC_KO_PBS_unique	70.9146	11.5632	Intron (ENSMUST00000219355.1/ENSMUST00000219355.1, intron 1 of 1)	10	17723218	17725674	2457	1	17684	ENSMUST00000038107.8	-204179	ENSMUSG00000039910	Cited2	Cbp/p300-interacting transactivator, with Glu/Asp-rich carboxy-terminal domain, 2
chr6	129713315	129714279	965	*	480	-1.77027	5.9247	5.26211e-12	merged_common	32.8897	112.193	Intron (ENSMUST00000088046.1/503550, intron 1 of 5)	6	129697218	129717132	19915	2	503550	ENSMUST00000088046.1	2853	ENSMUSG00000067610	Klri1	killer cell lectin-like receptor family I member 1
chr18	40440311	40440973	663	*	374	2.51195	4.93441	5.62461e-12	ATAC_KO_PBS_unique	73.0284	12.8032	Intron (ENSMUST00000091927.4/383348, intron 1 of 1)	18	40258361	40531168	272808	1	383348	ENSMUST00000091927.4	181950	ENSMUSG00000051401	Kctd16	potassium channel tetramerisation domain containing 16
chr13	75789060	75790004	945	*	498	1.94437	5.65559	5.87995e-12	ATAC_KO_PBS_unique	98.8915	25.6948	Distal Intergenic	13	75761983	75770695	8713	1	192657	ENSMUST00000221979.1	27077	ENSMUSG00000001542	Ell2	elongation factor RNA polymerase II 2
chr7	25267207	25268842	1636	*	981	-0.61728	8.88239	5.9669e-12	merged_common	381.027	584.488	Promoter	7	25267704	25294159	26456	1	71722	ENSMUST00000169266.7	0	ENSMUSG00000005442	Cic	capicua transcriptional repressor
chr10	10448860	10448940	81	*	33	2.41891	5.0222	6.16558e-12	ATAC_KO_PBS_unique	75.1476	14.0524	Intron (ENSMUST00000179956.7/215772, intron 2 of 36)	10	10399902	10429839	29938	2	215772	ENSMUST00000045328.13	-19021	ENSMUSG00000050994	Adgb	androglobin
chr18	37925920	37926467	548	*	396	1.967	5.58995	6.54347e-12	ATAC_KO_PBS_unique	95.237	24.3601	Intron (ENSMUST00000115634.7/13367, intron 1 of 26)	18	37843603	37935381	91779	2	13367	ENSMUST00000025337.13	8914	ENSMUSG00000024456	Diaph1	diaphanous related formin 1
chr9	111731638	111732120	483	*	290	2.95841	4.45794	7.08243e-12	ATAC_KO_PBS_unique	61.2715	7.88295	Distal Intergenic	9	111561437	111690348	128912	2	20840	ENSMUST00000035083.7	-41290	ENSMUSG00000032502	Stac	src homology three (SH3) and cysteine rich domain
chr3	68676805	68677419	615	*	413	1.44793	6.45222	7.1685e-12	merged_common	144.626	53.0123	Distal Intergenic	3	68690644	68698547	7904	1	16159	ENSMUST00000029345.11	-13225	ENSMUSG00000027776	Il12a	interleukin 12a
chr17	7430235	7430682	448	*	298	2.28728	5.19616	7.21303e-12	ATAC_KO_PBS_unique	80.9972	16.5932	Exon (ENSMUST00000232495.1/ENSMUST00000232495.1, exon 1 of 1)	17	7362815	7385464	22650	2	667055	ENSMUST00000070059.4	-44771	ENSMUSG00000056133	Unc93a2	unc-93 homolog A2
chr1	13454383	13455075	693	*	309	2.21775	5.26812	7.35902e-12	ATAC_KO_PBS_unique	83.1126	17.8672	Distal Intergenic	1	13164501	13374083	209583	2	17978	ENSMUST00000147927.7	-80300	ENSMUSG00000005886	Ncoa2	nuclear receptor coactivator 2
chr7	109544924	109545139	216	*	161	2.21775	5.26812	7.35902e-12	ATAC_KO_PBS_unique	83.1126	17.8672	Exon (ENSMUST00000079282.7/76954, exon 5 of 20)	7	109524059	109540433	16375	2	76954	ENSMUST00000207664.1	-4491	ENSMUSG00000031024	St5	suppression of tumorigenicity 5
chr18	50023808	50024359	552	*	455	1.84224	5.74467	8.10397e-12	ATAC_KO_PBS_unique	101.532	28.3161	Intron (ENSMUST00000148989.2/106869, intron 1 of 1)	18	50019567	50090794	71228	1	106869	ENSMUST00000126666.2	4241	ENSMUSG00000062210	Tnfaip8	tumor necrosis factor, alpha-induced protein 8
chr9	103233986	103235135	1150	*	828	1.56665	6.2181	8.8984e-12	merged_common	128.126	43.2544	Distal Intergenic	9	103208795	103230444	21650	2	22041	ENSMUST00000035158.15	-3542	ENSMUSG00000032554	Trf	transferrin
chr2	97040007	97040668	662	*	270	2.49658	4.92587	9.54876e-12	ATAC_KO_PBS_unique	72.2117	12.7956	Exon (ENSMUST00000165185.1/ENSMUST00000165185.1, exon 1 of 1)	2	97467657	97631664	164008	1	241568	ENSMUST00000059049.7	-426989	ENSMUSG00000050587	Lrrc4c	leucine rich repeat containing 4C
chr15	47900897	47901195	299	*	141	2.66787	4.69937	1.09708e-11	ATAC_KO_PBS_unique	65.4946	10.3062	Intron (ENSMUST00000160658.7/239420, intron 22 of 68)	15	47947897	47961468	13572	2	239420	ENSMUST00000110261.1	60273	ENSMUSG00000022311	Csmd3	CUB and Sushi multiple domains 3
chr16	75855495	75855777	283	*	208	2.66787	4.69937	1.09708e-11	ATAC_KO_PBS_unique	65.4946	10.3062	Distal Intergenic	16	75888252	75909279	21028	2	67742	ENSMUST00000150248.1	53502	ENSMUSG00000022876	Samsn1	SAM domain, SH3 domain and nuclear localization signals, 1
chr2	60076791	60077200	410	*	114	2.30656	5.08809	1.10737e-11	ATAC_KO_PBS_unique	75.6553	15.2931	Exon (ENSMUST00000137480.7/407823, exon 2 of 6)	2	59983786	60090070	106285	2	407823	ENSMUST00000129124.7	12870	ENSMUSG00000026987	Baz2b	bromodomain adjacent to zinc finger domain, 2B
chr6	115666626	115667011	386	*	162	2.30656	5.08809	1.10737e-11	ATAC_KO_PBS_unique	75.6553	15.2931	Intron (ENSMUST00000112949.7/110157, intron 1 of 16)	6	115618569	115675964	57396	2	110157	ENSMUST00000112949.7	8953	ENSMUSG00000000441	Raf1	v-raf-leukemia viral oncogene 1
chr17	50110882	50111595	714	*	418	2.30656	5.08809	1.10737e-11	ATAC_KO_PBS_unique	75.6553	15.2931	Intron (ENSMUST00000044503.13/76438, intron 2 of 9)	17	49993260	50094332	101073	2	76438	ENSMUST00000113195.7	-16550	ENSMUSG00000039316	Rftn1	raftlin lipid raft linker 1
chr13	34715252	34715826	575	*	322	1.73495	5.94209	1.12981e-11	ATAC_KO_PBS_unique	112.172	33.6986	Distal Intergenic	13	34734850	34747623	12774	1	108161	ENSMUST00000039605.7	-19024	ENSMUSG00000038246	Fam50b	family with sequence similarity 50, member B
chr17	17900787	17901262	476	*	112	2.07056	5.38698	1.19855e-11	ATAC_KO_PBS_unique	85.7616	20.417	Intron (ENSMUST00000054871.11/14289, intron 1 of 1)	17	17887888	17893853	5966	1	14289	ENSMUST00000064068.4	12899	ENSMUSG00000052270	Fpr2	formyl peptide receptor 2
chr3	65873002	65873460	459	*	319	2.20457	5.2608	1.2095e-11	ATAC_KO_PBS_unique	82.3151	17.8582	Distal Intergenic	3	65946782	65947998	1217	2	56706	ENSMUST00000149729.1	74538	ENSMUSG00000027829	Ccnl1	cyclin L1
chr15	13393010	13393614	605	*	444	2.20457	5.2608	1.2095e-11	ATAC_KO_PBS_unique	82.3151	17.8582	Distal Intergenic	15	13059251	13173675	114425	2	12563	ENSMUST00000226917.1	-219335	ENSMUSG00000039385	Cdh6	cadherin 6
chr4	143288979	143289168	190	*	93	2.93945	4.44741	1.25226e-11	ATAC_KO_PBS_unique	60.4276	7.87721	Intron (ENSMUST00000030317.13/14726, intron 1 of 5)	4	143268346	143299463	31118	2	14726	ENSMUST00000119654.1	10295	ENSMUSG00000028583	Pdpn	podoplanin
chrY	90801460	90804302	2843	*	700	-1.55601	6.21261	1.33216e-11	merged_common	43.2493	127.17	Intron (ENSMUST00000179483.7/170942, intron 3 of 3)	21	90785586	90816464	30879	1	170942	ENSMUST00000179077.1	15874	ENSMUSG00000096768	Erdr1	erythroid differentiation regulator 1
chr3	58508155	58508908	754	*	348	1.87055	5.68915	1.37199e-11	ATAC_KO_PBS_unique	98.6622	26.9811	Distal Intergenic	3	58525821	58557501	31681	1	229317	ENSMUST00000029387.14	-16913	ENSMUSG00000027810	Eif2a	eukaryotic translation initiation factor 2A
chr13	41263297	41263958	662	*	544	2.58448	4.82193	1.46254e-11	ATAC_KO_PBS_unique	69.2705	11.5489	Intron (ENSMUST00000165561.3/108934, intron 1 of 1)	13	41249844	41276577	26734	1	108934	ENSMUST00000165561.3	13453	ENSMUSG00000091264	Smim13	small integral membrane protein 13
chr5	110602895	110603589	695	*	238	1.68649	5.97345	1.55373e-11	ATAC_KO_PBS_unique	112.727	35.0224	Promoter	5	110603521	110621377	17857	1	231605	ENSMUST00000200404.4	0	ENSMUSG00000033316	Galnt9	polypeptide N-acetylgalactosaminyltransferase 9
chr11	111096524	111097385	862	*	354	1.46324	6.38057	1.63291e-11	merged_common	138.351	50.1769	Distal Intergenic	11	111066164	111076821	10658	1	16518	ENSMUST00000042970.2	30360	ENSMUSG00000041695	Kcnj2	potassium inwardly-rectifying channel, subfamily J, member 2
chr13	52636194	52636716	523	*	208	1.93298	5.57105	1.66453e-11	ATAC_KO_PBS_unique	92.8957	24.3282	Intron (ENSMUST00000120135.7/20963, intron 9 of 13)	13	52596959	52624339	27381	1	20963	ENSMUST00000140339.1	39235	ENSMUSG00000021457	Syk	spleen tyrosine kinase
chr3	19953710	19954292	583	*	389	1.81561	5.79809	1.6749e-11	ATAC_KO_PBS_unique	104.394	29.6567	Distal Intergenic	3	19957054	19993138	36085	1	12870	ENSMUST00000091309.11	-2762	ENSMUSG00000003617	Cp	ceruloplasmin
chr12	35294658	35295110	453	*	307	3.10535	4.29248	1.68381e-11	ATAC_KO_PBS_unique	57.4866	6.6798	Distal Intergenic	12	35194811	35194897	87	2	751520	ENSMUST00000102298.1	-99761	ENSMUSG00000076253	Mir680-3	microRNA 680-3
chr16	52468485	52468930	446	*	183	3.10535	4.29248	1.68381e-11	ATAC_KO_PBS_unique	57.4866	6.6798	Distal Intergenic	16	52248996	52454074	205079	2	11658	ENSMUST00000023312.13	-14411	ENSMUSG00000022636	Alcam	activated leukocyte cell adhesion molecule
chr16	55698383	55699041	659	*	368	1.48707	6.30942	1.70406e-11	merged_common	132.786	47.3695	Distal Intergenic	16	55811375	55822138	10764	2	80859	ENSMUST00000114458.7	123097	ENSMUSG00000035356	Nfkbiz	nuclear factor of kappa light polypeptide gene enhancer in B cells inhibitor, zeta
chr3	157616858	157617295	438	*	272	-2.05108	5.45495	1.82987e-11	ATAC_Control_PBS_unique	21.5469	89.2939	Intron (ENSMUST00000041175.12/19218, intron 2 of 2)	3	157566900	157644756	77857	1	19218	ENSMUST00000173533.1	49958	ENSMUSG00000040016	Ptger3	prostaglandin E receptor 3 (subtype EP3)
chr9	120067730	120069219	1490	*	535	-1.01511	7.39168	1.84666e-11	merged_common	118.121	238.73	Promoter	9	119901616	120068283	166668	2	13051	ENSMUST00000177637.1	0	ENSMUSG00000052336	Cx3cr1	chemokine (C-X3-C motif) receptor 1
chr18	12151314	12151896	583	*	234	2.29189	5.07994	1.84967e-11	ATAC_KO_PBS_unique	74.8476	15.2845	Promoter	18	12152673	12155498	2826	1	66878	ENSMUST00000234762.1	-777	ENSMUSG00000024404	Riok3	RIO kinase 3
chr15	59720933	59722131	1199	*	482	-1.02078	7.36989	1.95076e-11	merged_common	116.122	235.614	Distal Intergenic	15	59648653	59653689	5037	1	211770	ENSMUST00000118228.1	72280	ENSMUSG00000032501	Trib1	tribbles pseudokinase 1
chr9	66599646	66600101	456	*	117	2.24605	5.17326	1.96678e-11	ATAC_KO_PBS_unique	78.5906	16.5669	Distal Intergenic	9	66514637	66593142	78506	2	235441	ENSMUST00000127569.7	-6504	ENSMUSG00000032376	Usp3	ubiquitin specific peptidase 3
chr1	183263930	183264688	759	*	371	1.54253	6.2047	1.9904e-11	merged_common	125.885	43.2142	Distal Intergenic	1	183283769	183286182	2414	2	71678	ENSMUST00000194695.1	21494	ENSMUSG00000046836	Brox	BRO1 domain and CAAX motif containing
chr13	116843832	116844471	640	*	293	1.8213	5.73304	1.99134e-11	merged_common	99.9885	28.2933	Distal Intergenic	13	116802095	116838178	36084	2	74680	ENSMUST00000224552.1	-5654	ENSMUSG00000114290	4930435F18Rik	RIKEN cDNA 4930435F18 gene
chr17	12754453	12755617	1165	*	768	1.64909	6.00893	2.11537e-11	ATAC_KO_PBS_unique	114.046	36.3626	Intron (ENSMUST00000160932.2/104103, intron 1 of 2)	17	12748653	12750800	2148	2	16004	ENSMUST00000159127.1	-3653	ENSMUSG00000023830	Igf2r	insulin-like growth factor 2 receptor
chr2	84113326	84114286	961	*	456	1.60531	6.09151	2.23035e-11	merged_common	118.946	39.0934	Distal Intergenic	2	83916764	83941228	24465	2	71861	ENSMUST00000152829.1	-172098	ENSMUSG00000034552	Zswim2	zinc finger SWIM-type containing 2
chr16	38394162	38394877	716	*	397	1.76085	5.83311	2.36184e-11	ATAC_KO_PBS_unique	104.948	30.9675	Downstream (1-2kb)	16	38371998	38374137	2140	1	64082	ENSMUST00000146342.1	22164	ENSMUSG00000022803	Popdc2	popeye domain containing 2
chr14	30435387	30435875	489	*	188	2.5516	4.80367	2.49174e-11	ATAC_KO_PBS_unique	67.6243	11.5344	Intron (ENSMUST00000112250.4/12289, intron 1 of 46)	14	30479535	30510494	30960	1	75901	ENSMUST00000224453.1	-43660	ENSMUSG00000021962	Dcp1a	decapping mRNA 1A
chr17	51477137	51478171	1035	*	382	1.47941	6.30517	2.51822e-11	merged_common	132.044	47.3557	Distal Intergenic	17	51425209	51435838	10630	2	328837	ENSMUST00000233466.1	-41299	ENSMUSG00000117204	C330011F03Rik	RIKEN cDNA C330011F03 gene
chr4	95214953	95215711	759	*	420	1.44476	6.41089	2.60422e-11	merged_common	140.387	51.5718	Distal Intergenic	4	95049034	95052222	3189	2	16476	ENSMUST00000107094.1	-162731	ENSMUSG00000052684	Jun	jun proto-oncogene
chr18	61107318	61109870	2553	*	1298	-0.6511	8.62905	2.63051e-11	merged_common	315.939	496.139	Exon (ENSMUST00000025523.12/12978, exon 3 of 22)	18	61105852	61132149	26298	1	12978	ENSMUST00000115268.3	1466	ENSMUSG00000024621	Csf1r	colony stimulating factor 1 receptor
chr19	9954226	9955393	1168	*	497	1.31712	6.63222	2.91421e-11	merged_common	156.583	62.8421	Distal Intergenic	19	9982703	9985092	2390	1	14319	ENSMUST00000025563.6	-27310	ENSMUSG00000024661	Fth1	ferritin heavy polypeptide 1
chr3	33308301	33308823	523	*	122	2.35851	4.98864	2.93283e-11	ATAC_KO_PBS_unique	71.8988	14.0197	Distal Intergenic	3	32954337	33143247	188911	2	58869	ENSMUST00000108219.2	-165054	ENSMUSG00000027674	Pex5l	peroxisomal biogenesis factor 5-like
chr10	62944994	62945663	670	*	305	1.8107	5.72715	3.11147e-11	ATAC_KO_PBS_unique	99.2159	28.2818	3' UTR	10	62947026	62974185	27160	1	327762	ENSMUST00000131422.7	-1363	ENSMUSG00000036875	Dna2	DNA replication helicase/nuclease 2
chr2	84059300	84059704	405	*	110	2.0451	5.37284	3.14875e-11	merged_common	84.1791	20.3971	Distal Intergenic	2	83916764	83941228	24465	2	71861	ENSMUST00000152829.1	-118072	ENSMUSG00000034552	Zswim2	zinc finger SWIM-type containing 2
chr1	191894375	191894792	418	*	292	2.10215	5.30735	3.21473e-11	ATAC_KO_PBS_unique	82.0496	19.1103	Exon (ENSMUST00000139827.7/98736, exon 5 of 5)	1	191890233	191899256	9024	2	98736	ENSMUST00000140401.1	4464	ENSMUSG00000055833	1700034H15Rik	RIKEN cDNA 1700034H15 gene
chr13	52914540	52915076	537	*	174	2.61486	4.66993	3.28927e-11	ATAC_KO_PBS_unique	63.0035	10.2852	Intron (ENSMUST00000137064.7/11992, intron 2 of 9)	13	52835119	52919232	84114	2	11992	ENSMUST00000137064.7	4156	ENSMUSG00000021460	Auh	AU RNA binding protein/enoyl-coenzyme A hydratase
chr7	47067789	47068299	511	*	216	1.59663	6.08668	3.35963e-11	ATAC_KO_PBS_unique	118.193	39.0802	Exon (ENSMUST00000217248.1/ENSMUST00000217248.1, exon 6 of 18)	7	47083166	47083224	59	2	102465639	ENSMUST00000183776.1	14925	ENSMUSG00000098960	Mir7056	microRNA 7056
chr9	95406721	95407932	1212	*	616	1.59663	6.08668	3.35963e-11	merged_common	118.193	39.0802	Promoter	9	95399292	95406722	7431	2	54371	ENSMUST00000036267.7	0	ENSMUSG00000033350	Chst2	carbohydrate sulfotransferase 2
chr5	53454511	53455210	700	*	394	1.75083	5.82754	3.64697e-11	ATAC_KO_PBS_unique	104.181	30.9555	Distal Intergenic	5	53466152	53649390	183239	1	19664	ENSMUST00000201991.3	-10942	ENSMUSG00000039191	Rbpj	recombination signal binding protein for immunoglobulin kappa J region
chr7	19698632	19699463	832	*	525	1.89804	5.55164	4.19737e-11	ATAC_KO_PBS_unique	90.5511	24.2955	Promoter	7	19696109	19699188	3080	2	11816	ENSMUST00000174064.8	0	ENSMUSG00000002985	Apoe	apolipoprotein E
chr18	46404508	46405191	684	*	303	1.89804	5.55164	4.19737e-11	ATAC_KO_PBS_unique	90.5511	24.2955	Distal Intergenic	18	46465215	46465790	576	2	72076	ENSMUST00000180618.1	60599	NA	Mospd4	motile sperm domain containing 4
chrX	38642066	38642539	474	*	376	2.72755	4.54373	4.80031e-11	ATAC_KO_PBS_unique	60.0256	9.06279	Distal Intergenic	20	38630785	38635087	4303	2	59048	ENSMUST00000058265.7	-6979	ENSMUSG00000048970	C1galt1c1	C1GALT1-specific chaperone 1
chr6	22222054	22222642	589	*	246	1.78924	5.71523	4.85096e-11	ATAC_KO_PBS_unique	97.6704	28.2584	Exon (ENSMUST00000115383.8/214642, exon 17 of 22)	6	22288227	22293579	5353	1	93735	ENSMUST00000128245.7	-65585	ENSMUSG00000029671	Wnt16	wingless-type MMTV integration site family, member 16
chr12	54404781	54405561	781	*	479	1.78924	5.71523	4.85096e-11	ATAC_KO_PBS_unique	97.6704	28.2584	Exon (ENSMUST00000217924.1/ENSMUST00000217924.1, exon 3 of 4)	12	54388042	54391318	3277	2	665239	ENSMUST00000223334.1	-13463	NA	Gm7550	predicted gene 7550
chr5	31602425	31602804	380	*	192	2.34295	4.98	4.91079e-11	ATAC_KO_PBS_unique	71.0851	14.0114	Intron (ENSMUST00000201999.3/ENSMUST00000201999.3, intron 1 of 3)	5	31598733	31622644	23912	1	66845	ENSMUST00000202953.1	3692	ENSMUSG00000106918	Mrpl33	mitochondrial ribosomal protein L33
chr5	8805700	8806942	1243	*	320	1.51266	6.23457	4.94715e-11	merged_common	127.195	44.5774	Exon (ENSMUST00000199955.4/18669, exon 4 of 22)	5	8773577	8798523	24947	2	330031	ENSMUST00000181058.1	-7177	NA	Gm5106	predicted gene 5106
chr2	170321521	170322480	960	*	603	1.58788	6.08182	5.05015e-11	ATAC_KO_PBS_unique	117.438	39.067	Distal Intergenic	2	170347931	170349740	1810	2	76960	ENSMUST00000156657.7	27260	ENSMUSG00000013523	Bcas1	breast carcinoma amplified sequence 1
chr7	43273281	43273830	550	*	373	2.01913	5.35841	5.08644e-11	ATAC_KO_PBS_unique	82.5946	20.3767	Distal Intergenic	7	43296523	43311486	14964	2	69930	ENSMUST00000048015.13	37656	ENSMUSG00000012640	Zfp715	zinc finger protein 715
chr15	5415858	5416396	539	*	302	2.26204	5.06335	5.12643e-11	ATAC_KO_PBS_unique	73.2304	15.2668	Distal Intergenic	15	5496266	5594984	98719	1	71432	ENSMUST00000211750.1	-79870	ENSMUSG00000110018	5430437J10Rik	RIKEN cDNA 5430437J10 gene
chr18	39560796	39561088	293	*	200	2.26204	5.06335	5.12643e-11	ATAC_KO_PBS_unique	73.2304	15.2668	Distal Intergenic	18	39486844	39491301	4458	2	14815	ENSMUST00000124115.1	-69495	ENSMUSG00000024431	Nr3c1	nuclear receptor subfamily 3, group C, member 1
chr9	42127651	42128583	933	*	561	1.43373	6.36417	5.13664e-11	merged_common	135.395	50.1197	Distal Intergenic	9	41964720	42124297	159578	2	20660	ENSMUST00000060989.8	-3354	ENSMUSG00000049313	Sorl1	sortilin-related receptor, LDLR class A repeats-containing
chr6	57765105	57766098	994	*	547	1.45615	6.29225	5.46671e-11	merged_common	129.816	47.3133	Intron (ENSMUST00000127485.7/232023, intron 3 of 4)	6	57762567	57824640	62074	2	232023	ENSMUST00000143953.2	58542	ENSMUSG00000037788	Vopp1	vesicular, overexpressed in cancer, prosurvival protein 1
chr1	95656827	95657649	823	*	500	1.42306	6.39883	5.52771e-11	merged_common	138.176	51.5286	Intron (ENSMUST00000043336.10/20452, intron 2 of 4)	1	95618551	95667535	48985	2	20452	ENSMUST00000189556.1	9886	ENSMUSG00000040710	St8sia4	ST8 alpha-N-acetyl-neuraminide alpha-2,8-sialyltransferase 4
chr13	4662919	4663181	263	*	114	3.45394	3.83621	5.54889e-11	ATAC_KO_PBS_unique	47.2807	4.31464	Intron (ENSMUST00000221900.1/ENSMUST00000221900.1, intron 1 of 6)	13	4590757	4609174	18418	2	56043	ENSMUST00000110691.9	-53745	ENSMUSG00000045410	Akr1e1	aldo-keto reductase family 1, member E1
chr9	71167091	71167439	349	*	191	2.5967	4.65984	5.67736e-11	ATAC_KO_PBS_unique	62.1719	10.278	Intron (ENSMUST00000214960.1/102635087, intron 1 of 2)	9	71111844	71168657	56814	2	64008	ENSMUST00000113570.7	1218	ENSMUSG00000032204	Aqp9	aquaporin 9
chr19	3687323	3688308	986	*	605	-0.89363	7.69962	5.6857e-11	merged_common	152.515	283.349	Promoter	19	3621671	3686564	64894	2	16973	ENSMUST00000176867.1	-759	ENSMUSG00000024913	Lrp5	low density lipoprotein receptor-related protein 5
chr16	75960911	75961807	897	*	335	1.60434	6.03841	5.74283e-11	merged_common	114.609	37.6934	Intron (ENSMUST00000114240.2/67742, intron 5 of 13)	16	75859257	75953332	94076	2	67742	ENSMUST00000226794.1	-7579	ENSMUSG00000022876	Samsn1	SAM domain, SH3 domain and nuclear localization signals, 1
chr5	99214304	99214985	682	*	342	1.30542	6.59197	5.75364e-11	merged_common	151.658	61.3614	Downstream (2-3kb)	5	99227794	99234066	6273	2	320292	ENSMUST00000166632.1	19081	ENSMUSG00000089809	Rasgef1b	RasGEF domain family, member 1B
chr2	33869360	33871177	1818	*	1126	-1.18191	6.86545	6.22005e-11	merged_common	77.4125	175.631	Intron (ENSMUST00000041555.9/72543, intron 2 of 9)	2	33787168	33886845	99678	2	72543	ENSMUST00000192765.5	15668	ENSMUSG00000038740	Mvb12b	multivesicular body subunit 12B
chr15	81809984	81812272	2289	*	1325	-0.68553	8.41931	6.55164e-11	merged_common	269.949	434.158	Promoter	15	81811046	81821256	10211	1	21685	ENSMUST00000168200.1	0	ENSMUSG00000022389	Tef	thyrotroph embryonic factor
chr15	100659873	100661040	1168	*	713	-0.96069	7.46758	6.71849e-11	merged_common	126.872	246.924	Intron (ENSMUST00000183211.7/668218, intron 2 of 10)	15	100645443	100651660	6218	2	668218	ENSMUST00000182494.1	-8213	ENSMUSG00000098112	Bin2	bridging integrator 2
chr18	73744759	73745402	644	*	320	1.93134	5.48792	7.08082e-11	ATAC_KO_PBS_unique	87.6444	22.9791	Intron (ENSMUST00000041138.2/114615, intron 2 of 3)	18	73735038	73754479	19442	2	114615	ENSMUST00000041138.2	9077	ENSMUSG00000036941	Elac1	elaC ribonuclease Z 1
chr8	11463773	11464863	1091	*	582	1.27743	6.67561	7.28049e-11	merged_common	159.159	65.6578	Intron (ENSMUST00000033900.6/19332, intron 1 of 1)	8	11477929	11480241	2313	1	102132	ENSMUST00000180408.1	-13066	ENSMUSG00000096957	E230013L22Rik	RIKEN cDNA E230013L22 gene
chr9	70284358	70285220	863	*	352	1.61225	5.98846	7.38141e-11	ATAC_KO_PBS_unique	111.013	36.311	Intron (ENSMUST00000213863.1/71602, intron 1 of 3)	9	70207368	70399766	192399	1	71602	ENSMUST00000034745.8	76990	ENSMUSG00000032220	Myo1e	myosin IE
chr13	60897067	60897903	837	*	437	1.34279	6.50701	7.63694e-11	merged_common	144.849	57.1078	Promoter	13	60895355	60897447	2093	2	13025	ENSMUST00000021884.9	0	ENSMUSG00000074874	Ctla2b	cytotoxic T lymphocyte-associated protein 2 beta
chr5	123831949	123832723	775	*	421	2.4169	4.88161	7.76274e-11	ATAC_KO_PBS_unique	68.1225	12.7565	Distal Intergenic	5	123819547	123821592	2046	1	208628	ENSMUST00000197002.1	12402	ENSMUSG00000029414	Kntc1	kinetochore associated 1
chr8	91312991	91313855	865	*	485	0.83276	7.84518	8.00628e-11	merged_common	306.886	172.303	Promoter	8	91217030	91313262	96233	2	244585	ENSMUST00000047783.13	0	ENSMUSG00000033282	Rpgrip1l	Rpgrip1-like
chr2	84804024	84804586	563	*	109	2.06178	5.28493	8.45633e-11	ATAC_KO_PBS_unique	79.662	19.0807	Intron (ENSMUST00000102642.8/56791, intron 2 of 3)	2	84802703	84810335	7633	1	56791	ENSMUST00000154709.1	1321	ENSMUSG00000027078	Ube2l6	ubiquitin-conjugating enzyme E2L 6
chr2	164454697	164455300	604	*	276	2.07538	5.29248	8.45633e-11	ATAC_KO_PBS_unique	80.4583	19.0906	Distal Intergenic	2	164456976	164465512	8537	1	66460	ENSMUST00000109352.7	-1676	ENSMUSG00000045503	Sys1	SYS1 Golgi-localized integral membrane protein homolog (S. cerevisiae)
chr11	95833246	95836409	3164	*	1301	-0.8226	7.89113	8.48367e-11	merged_common	178.506	315.704	Promoter	11	95832723	95835890	3168	2	66610	ENSMUST00000137645.1	0	ENSMUSG00000018381	Abi3	ABI gene family, member 3
chr2	148488948	148489223	276	*	178	2.24685	5.05492	8.50522e-11	ATAC_KO_PBS_unique	72.4214	15.258	Distal Intergenic	2	148436640	148443563	6924	2	17064	ENSMUST00000099269.3	-45385	ENSMUSG00000027435	Cd93	CD93 antigen
chr17	26512280	26513376	1097	*	380	2.23149	5.04638	8.50522e-11	ATAC_KO_PBS_unique	71.6118	15.2489	Distal Intergenic	17	26505590	26508519	2930	2	19252	ENSMUST00000025025.6	-3761	ENSMUSG00000024190	Dusp1	dual specificity phosphatase 1
chr9	95180162	95181060	899	*	554	1.17803	6.88569	8.53308e-11	merged_common	177.873	78.6119	Intron (ENSMUST00000033463.9/331004, intron 14 of 15)	9	95121686	95124551	2866	1	331004	ENSMUST00000162329.1	58476	ENSMUSG00000031129	Slc9a9	solute carrier family 9 (sodium/hydrogen exchanger), member 9
chr13	5603901	5604742	842	*	562	1.72027	5.81057	8.63821e-11	merged_common	101.878	30.9193	Intron (ENSMUST00000222871.1/ENSMUST00000222871.1, intron 2 of 2)	13	5855515	5857561	2047	2	71867	ENSMUST00000223142.1	252819	ENSMUSG00000100625	1700016G22Rik	RIKEN cDNA 1700016G22 gene
chr1	64301218	64302047	830	*	423	1.43709	6.3244	8.72062e-11	merged_common	131.867	48.7002	Intron (ENSMUST00000190863.1/ENSMUST00000190863.1, intron 1 of 1)	1	64079103	64122282	43180	2	93691	ENSMUST00000135075.1	-178936	ENSMUSG00000025959	Klf7	Kruppel-like factor 7 (ubiquitous)
chr14	87044348	87044803	456	*	185	3.17406	4.03841	8.77773e-11	ATAC_KO_PBS_unique	49.3658	5.46939	Intron (ENSMUST00000022599.13/56419, intron 4 of 27)	14	87075739	87141143	65405	2	56419	ENSMUST00000226134.1	96340	ENSMUSG00000022021	Diaph3	diaphanous related formin 3
chr8	122280916	122282781	1866	*	832	-0.62244	8.65948	9.2443e-11	merged_common	325.894	501.707	Promoter	8	122282141	122337251	55111	1	22761	ENSMUST00000054052.14	0	ENSMUSG00000049577	Zfpm1	zinc finger protein, multitype 1
chr17	87330897	87331793	897	*	303	-1.49123	6.18316	9.71958e-11	merged_common	43.3375	121.834	Promoter	17	87330214	87339949	9736	1	225049	ENSMUST00000148554.1	683	ENSMUSG00000036918	Ttc7	tetratricopeptide repeat domain 7
chr15	59864365	59865371	1007	*	447	1.5375	6.10473	9.91092e-11	ATAC_KO_PBS_unique	117.253	40.3915	Distal Intergenic	15	59788417	59794959	6543	2	100503021	ENSMUST00000228865.1	-69406	ENSMUSG00000115426	Gm19510	predicted gene, 19510
chr14	14345266	14346956	1691	*	447	1.22774	6.7414	1.04273e-10	merged_common	163.741	69.915	Promoter	14	14346275	14355490	9216	1	16188	ENSMUST00000090591.3	0	ENSMUSG00000068758	Il3ra	interleukin 3 receptor, alpha chain
chr10	20104409	20105018	610	*	406	1.87421	5.53841	1.04886e-10	merged_common	88.9865	24.2734	Intron (ENSMUST00000095806.9/26408, intron 18 of 29)	10	20099525	20105437	5913	1	26408	ENSMUST00000138994.1	4884	ENSMUSG00000071369	Map3k5	mitogen-activated protein kinase kinase kinase 5
chr2	178415768	178417450	1683	*	939	1.06786	7.12125	1.05496e-10	merged_common	201.576	96.157	5' UTR	2	178414582	178420290	5709	1	71532	ENSMUST00000129003.1	1186	ENSMUSG00000070476	Fam217b	family with sequence similarity 217, member B
chr6	122635370	122635693	324	*	76	2.46558	4.75588	1.10639e-10	ATAC_KO_PBS_unique	63.4993	11.4962	Distal Intergenic	6	122626753	122630272	3520	1	73708	ENSMUST00000123429.1	8617	ENSMUSG00000046323	Dppa3	developmental pluripotency-associated 3
chr7	140112129	140112880	752	*	376	2.44766	4.74593	1.10639e-10	ATAC_KO_PBS_unique	62.6725	11.4884	Exon (ENSMUST00000026538.12/93747, exon 3 of 8)	7	140115799	140129193	13395	1	212503	ENSMUST00000211757.1	-2919	ENSMUSG00000025464	Paox	polyamine oxidase (exo-N4-amino)
chr2	132110746	132111809	1064	*	119	1.60287	5.98325	1.11474e-10	merged_common	110.254	36.2979	Promoter	2	132094224	132111448	17225	2	54338	ENSMUST00000128899.1	0	ENSMUSG00000027340	Slc23a2	solute carrier family 23 (nucleobase transporters), member 2
chr12	108309125	108309965	841	*	450	1.91903	5.48109	1.12272e-10	ATAC_KO_PBS_unique	86.8591	22.9683	Intron (ENSMUST00000021685.7/214305, intron 1 of 8)	12	108306548	108326608	20061	1	214305	ENSMUST00000223395.1	2577	ENSMUSG00000021260	Hhipl1	hedgehog interacting protein-like 1
chr1	171850063	171850195	133	*	75	1.76741	5.7031	1.17113e-10	ATAC_KO_PBS_unique	96.1227	28.2346	Intron (ENSMUST00000155802.7/12523, intron 2 of 8)	1	171840633	171886430	45798	1	12523	ENSMUST00000042302.6	9430	ENSMUSG00000038147	Cd84	CD84 antigen
chr12	35889882	35890053	172	*	85	1.76741	5.7031	1.17113e-10	ATAC_KO_PBS_unique	96.1227	28.2346	Distal Intergenic	12	35925620	35949736	24117	1	403205	ENSMUST00000042101.4	-35567	ENSMUSG00000036231	Agr3	anterior gradient 3
chr19	11431693	11431855	163	*	31	2.84028	4.39232	1.19971e-10	ATAC_KO_PBS_unique	56.1985	7.84721	Distal Intergenic	19	11443553	11458193	14641	1	60361	ENSMUST00000136366.7	-11698	ENSMUSG00000056290	Ms4a4b	membrane-spanning 4-domains, subfamily A, member 4B
chr3	133622948	133623861	914	*	653	1.46365	6.20734	1.24467e-10	merged_common	122.715	44.4933	Exon (ENSMUST00000193574.1/ENSMUST00000193574.1, exon 3 of 3)	3	133488535	133545139	56605	2	214133	ENSMUST00000197118.4	-77809	ENSMUSG00000040943	Tet2	tet methylcytosine dioxygenase 2
chr18	62719745	62720420	676	*	434	1.80451	5.65246	1.28576e-10	merged_common	94.0082	26.9125	Intron (ENSMUST00000097557.4/100038417, intron 1 of 4)	18	62607539	62741387	133849	2	100038417	ENSMUST00000097557.4	20967	ENSMUSG00000073551	Spink13	serine peptidase inhibitor, Kazal type 13
chr17	84865223	84865516	294	*	155	2.40035	4.87242	1.30337e-10	ATAC_KO_PBS_unique	67.3028	12.7484	Distal Intergenic	17	84766428	84790789	24362	2	72416	ENSMUST00000161928.7	-74434	ENSMUSG00000024120	Lrpprc	leucine-rich PPR-motif containing
chr7	120851030	120852736	1707	*	698	-0.78506	7.99673	1.34217e-10	merged_common	194.577	335.289	Promoter	7	120851189	120880354	29166	1	13631	ENSMUST00000143322.8	0	ENSMUSG00000035064	Eef2k	eukaryotic elongation factor-2 kinase
chrX	9469219	9469341	123	*	75	5.20156	2.58496	1.34605e-10	ATAC_KO_PBS_unique	36.3968	0.98909	Promoter	20	9435252	9469324	34073	2	13058	ENSMUST00000015484.9	0	ENSMUSG00000015340	Cybb	cytochrome b-245, beta polypeptide
chr2	75685263	75686180	918	*	273	1.38607	6.37828	1.3597e-10	merged_common	134.486	51.4552	Intron (ENSMUST00000102672.4/18024, intron 1 of 4)	2	75691052	75704489	13438	2	18024	ENSMUST00000152371.1	18309	ENSMUSG00000015839	Nfe2l2	nuclear factor, erythroid derived 2, like 2
chr5	113841346	113843511	2166	*	615	-0.91723	7.52734	1.36544e-10	merged_common	134.245	253.52	3' UTR	5	113846189	113847620	1432	2	23790	ENSMUST00000172016.1	4109	ENSMUSG00000004530	Coro1c	coronin, actin binding protein 1C
chr17	69180947	69181745	799	*	467	1.45183	6.24593	1.36584e-10	merged_common	125.526	45.8871	Intron (ENSMUST00000223610.1/13823, intron 1 of 3)	17	69156845	69289324	132480	1	13823	ENSMUST00000225977.1	24102	ENSMUSG00000024044	Epb41l3	erythrocyte membrane protein band 4.1 like 3
chr1	92216735	92217178	444	*	185	2.04804	5.27729	1.36668e-10	ATAC_KO_PBS_unique	78.8648	19.0705	Distal Intergenic	1	92030144	92195699	165556	2	208727	ENSMUST00000212408.1	-21036	ENSMUSG00000026313	Hdac4	histone deacetylase 4
chr4	143288446	143288855	410	*	265	2.29515	4.95345	1.36732e-10	ATAC_KO_PBS_unique	68.6423	13.9856	Intron (ENSMUST00000030317.13/14726, intron 1 of 5)	4	143268346	143299463	31118	2	14726	ENSMUST00000119654.1	10608	ENSMUSG00000028583	Pdpn	podoplanin
chr6	131269442	131270122	681	*	385	2.10834	5.20734	1.40269e-10	ATAC_KO_PBS_unique	76.7189	17.7922	Distal Intergenic	6	131284513	131285873	1361	2	66441	ENSMUST00000174488.1	15751	ENSMUSG00000030188	Magohb	mago homolog B, exon junction complex core component
chr10	43702977	43703554	578	*	95	1.84401	5.59984	1.40512e-10	ATAC_KO_PBS_unique	91.8906	25.5958	Intron (ENSMUST00000215599.1/414125, intron 3 of 4)	10	43745809	43757569	11761	1	69443	ENSMUST00000213330.1	-42255	ENSMUSG00000111422	1700027J07Rik	RIKEN cDNA 1700027J07 gene
chr10	95191821	95192363	543	*	273	2.21593	5.03774	1.40776e-10	ATAC_KO_PBS_unique	70.8013	15.2398	Intron (ENSMUST00000220279.1/12905, intron 1 of 1)	10	95120582	95145825	25244	2	628062	ENSMUST00000220248.1	-45996	ENSMUSG00000112481	Gm29684	predicted gene, 29684
chr2	79056173	79056559	387	*	128	2.66896	4.51118	1.44869e-10	ATAC_KO_PBS_unique	57.5068	9.04236	Intron (ENSMUST00000193021.1/ENSMUST00000193021.1, intron 2 of 4)	2	78918393	78920052	1660	1	22193	ENSMUST00000153266.1	137780	ENSMUSG00000027011	Ube2e3	ubiquitin-conjugating enzyme E2E 3
chr10	121488301	121489417	1117	*	562	1.052	7.15697	1.54962e-10	merged_common	205.496	99.1108	Exon (ENSMUST00000218056.1/ENSMUST00000218056.1, exon 1 of 2)	10	121410350	121476347	65998	2	192678	ENSMUST00000026902.8	-11954	ENSMUSG00000025795	Rassf3	Ras association (RalGDS/AF-6) domain family member 3
chr3	69155982	69156964	983	*	630	1.4802	6.21653	1.58327e-10	merged_common	124.209	44.5215	Exon (ENSMUST00000195406.1/381452, exon 3 of 3)	3	69131233	69157177	25945	1	381452	ENSMUST00000195406.1	24749	ENSMUSG00000094763	Gm1647	predicted gene 1647
chr2	20624141	20624549	409	*	88	3.12505	4.01118	1.593e-10	ATAC_KO_PBS_unique	47.6269	5.45907	Intron (ENSMUST00000114610.7/208618, intron 4 of 7)	2	20559935	20709635	149701	1	208618	ENSMUST00000136870.1	64206	ENSMUSG00000036617	Etl4	enhancer trap locus 4
chr9	42180111	42180401	291	*	132	3.12505	4.01118	1.593e-10	ATAC_KO_PBS_unique	47.6269	5.45907	Intron (ENSMUST00000213343.1/78194, intron 4 of 4)	9	42183648	42209213	25566	2	78194	ENSMUST00000216643.1	28812	ENSMUSG00000111767	4930546K05Rik	RIKEN cDNA 4930546K05 gene
chrX	7085969	7086250	282	*	140	3.14979	4.02492	1.593e-10	ATAC_KO_PBS_unique	48.4967	5.46426	Distal Intergenic	20	7068213	7078591	10379	1	11643	ENSMUST00000115751.2	17756	ENSMUSG00000050089	Akap4	A kinase (PRKA) anchor protein 4
chr16	84583251	84584561	1311	*	318	1.16149	6.8765	1.6345e-10	merged_common	175.733	78.5617	Distal Intergenic	16	84703167	84715245	12079	1	100653389	ENSMUST00000185662.6	-118606	ENSMUSG00000097418	Mir155hg	Mir155 host gene (non-protein coding)
chr3	65372584	65373094	511	*	365	2.54064	4.62869	1.68011e-10	ATAC_KO_PBS_unique	59.6731	10.2558	Intron (ENSMUST00000049230.10/16497, intron 13 of 13)	3	65381680	65383381	1702	2	67437	ENSMUST00000139785.1	10287	ENSMUSG00000027828	Ssr3	signal sequence receptor, gamma
chr4	3626702	3626976	275	*	135	2.54064	4.62869	1.68011e-10	ATAC_KO_PBS_unique	59.6731	10.2558	Distal Intergenic	4	3605637	3615283	9647	1	116940	ENSMUST00000146315.1	21065	ENSMUSG00000028233	Tgs1	trimethylguanosine synthase 1
chr5	9068670	9069372	703	*	367	1.55231	6.06206	1.6934e-10	ATAC_KO_PBS_unique	114.422	39.0136	Distal Intergenic	5	9100668	9158080	57413	1	652925	ENSMUST00000196029.4	-31296	ENSMUSG00000079659	Tmem243	transmembrane protein 243, mitochondrial
chr2	60901450	60902101	652	*	142	1.42448	6.27465	1.72201e-10	merged_common	126.842	47.2555	Intron (ENSMUST00000028347.12/56878, intron 1 of 13)	2	60842297	60889030	46734	2	56878	ENSMUST00000132529.7	-12420	ENSMUSG00000026970	Rbms1	RNA binding motif, single stranded interacting protein 1
chr18	60638060	60638776	717	*	366	1.42448	6.27465	1.72201e-10	merged_common	126.842	47.2555	Intron (ENSMUST00000143275.2/104027, intron 1 of 2)	18	60593990	60629853	35864	2	104027	ENSMUST00000130360.1	-8207	ENSMUSG00000043079	Synpo	synaptopodin
chr7	120149723	120150707	985	*	622	1.23352	6.68296	1.72776e-10	merged_common	157.556	67.0052	Distal Intergenic	7	120132354	120145291	12938	2	22787	ENSMUST00000207726.1	-4432	ENSMUSG00000030911	Zp2	zona pellucida glycoprotein 2
chr3	103377901	103378715	815	*	372	1.11308	6.98	1.74175e-10	merged_common	185.663	85.833	Distal Intergenic	3	103341682	103355563	13882	1	94093	ENSMUST00000197365.1	36219	ENSMUSG00000033014	Trim33	tripartite motif-containing 33
chr7	96790369	96790880	512	*	178	1.9066	5.47418	1.77595e-10	ATAC_KO_PBS_unique	86.0725	22.9573	Intron (ENSMUST00000107162.7/23966, intron 16 of 32)	7	96796641	96798570	1930	1	23966	ENSMUST00000130299.7	-5761	ENSMUSG00000048078	Tenm4	teneurin transmembrane protein 4
chr18	53264887	53265891	1005	*	176	1.74522	5.69077	1.81336e-10	ATAC_KO_PBS_unique	94.5745	28.2105	Intron (ENSMUST00000165032.7/69226, intron 1 of 6)	18	53245769	53390823	145055	1	69226	ENSMUST00000025417.8	19118	ENSMUSG00000024535	Snx24	sorting nexing 24
chr18	52908875	52909855	981	*	460	1.42163	6.31582	1.85141e-10	merged_common	130.385	48.6715	Intron (ENSMUST00000115410.8/67847, intron 10 of 10)	18	52838010	52915312	77303	1	67847	ENSMUST00000179689.1	70865	ENSMUSG00000024534	Sncaip	synuclein, alpha interacting protein (synphilin)
chr15	62392466	62392823	358	*	225	3.37522	3.79248	1.88184e-10	ATAC_KO_PBS_unique	44.6346	4.30159	Distal Intergenic	15	62222603	62242505	19903	1	19296	ENSMUST00000182141.1	169863	ENSMUSG00000097039	Pvt1	Pvt1 oncogene
chr19	11107901	11108120	220	*	71	3.37522	3.79248	1.88184e-10	ATAC_KO_PBS_unique	44.6346	4.30159	Intron (ENSMUST00000025635.7/69369, intron 4 of 6)	19	11096816	11130876	34061	2	69369	ENSMUST00000025635.7	22756	ENSMUSG00000024729	1700017D01Rik	RIKEN cDNA 1700017D01 gene
chr17	73949576	73950627	1052	*	726	1.62037	5.93672	1.90731e-10	ATAC_KO_PBS_unique	107.404	34.9334	Promoter	17	73883895	73950182	66288	2	22436	ENSMUST00000024866.5	0	ENSMUSG00000024066	Xdh	xanthine dehydrogenase
chr5	103629165	103629802	638	*	469	1.44368	6.2414	2.00112e-10	merged_common	124.78	45.8726	Promoter	5	103605711	103629403	23693	2	75750	ENSMUST00000031263.1	0	ENSMUSG00000029321	Slc10a6	solute carrier family 10 (sodium/bile acid cotransporter family), member 6
chr9	7872604	7873647	1044	*	469	1.09887	6.99696	2.00206e-10	merged_common	186.935	87.2767	Promoter	9	7848699	7873024	24326	2	11796	ENSMUST00000013949.14	0	ENSMUSG00000032000	Birc3	baculoviral IAP repeat-containing 3
chrY	90806675	90809752	3078	*	1117	-1.18525	6.8017	2.0087e-10	merged_common	73.9806	168.234	Intron (ENSMUST00000179483.7/170942, intron 3 of 3)	21	90785586	90816464	30879	1	170942	ENSMUST00000179077.1	21089	ENSMUSG00000096768	Erdr1	erythroid differentiation regulator 1
chr10	51490568	51491018	451	*	252	2.79839	4.36905	2.0995e-10	ATAC_KO_PBS_unique	54.5023	7.83457	Promoter	10	51490956	51496601	5646	1	14728	ENSMUST00000217705.1	0	ENSMUSG00000062593	Lilrb4a	leukocyte immunoglobulin-like receptor, subfamily B, member 4A
chr7	63896361	63897633	1273	*	714	0.99659	7.27296	2.11898e-10	merged_common	218.464	109.491	Exon (ENSMUST00000183782.7/ENSMUST00000183782.7, exon 1 of 4)	7	63916857	63920539	3683	1	381994	ENSMUST00000177638.1	-19224	ENSMUSG00000095061	E030018B13Rik	RIKEN cDNA E030018B13 gene
chr18	60480900	60481569	670	*	320	1.63873	5.88863	2.16089e-10	merged_common	104.546	33.5738	Intron (ENSMUST00000042710.6/106878, intron 1 of 1)	18	60474193	60501983	27791	2	106878	ENSMUST00000042710.6	20414	ENSMUSG00000038059	Smim3	small integral membrane protein 3
chr8	94178481	94179838	1358	*	561	0.96808	7.3543	2.18235e-10	merged_common	228.863	116.992	Promoter	8	94179082	94180327	1246	1	17748	ENSMUST00000034215.7	0	ENSMUSG00000031765	Mt1	metallothionein 1
chr10	118981355	118981783	429	*	306	2.3836	4.86311	2.18315e-10	ATAC_KO_PBS_unique	66.4828	12.7401	Distal Intergenic	10	118920381	118927143	6763	2	216377	ENSMUST00000219032.1	-54212	ENSMUSG00000112854	Gm38403	predicted gene, 38403
chr6	5339201	5339792	592	*	308	2.03415	5.26958	2.20342e-10	ATAC_KO_PBS_unique	78.0678	19.0604	Distal Intergenic	6	5264147	5298455	34309	2	330260	ENSMUST00000057792.8	-40746	ENSMUSG00000032667	Pon2	paraoxonase 2
chr10	99269939	99270964	1026	*	539	1.31486	6.4915	2.24646e-10	merged_common	141.92	57.0466	Exon (ENSMUST00000219528.1/ENSMUST00000219528.1, exon 1 of 2)	10	99265641	99266799	1159	1	67603	ENSMUST00000220218.1	4298	ENSMUSG00000019960	Dusp6	dual specificity phosphatase 6
chr1	128590767	128591240	474	*	228	2.27882	4.94437	2.27337e-10	ATAC_KO_PBS_unique	67.8266	13.9768	Intron (ENSMUST00000052172.6/12767, intron 1 of 1)	1	128588199	128592290	4092	2	12767	ENSMUST00000052172.6	1050	ENSMUSG00000045382	Cxcr4	chemokine (C-X-C motif) receptor 4
chr10	10456731	10457457	727	*	435	1.06636	7.09769	2.30491e-10	merged_common	198.208	94.6487	Intron (ENSMUST00000179956.7/215772, intron 1 of 36)	10	10335703	10472314	136612	2	215772	ENSMUST00000179956.7	14857	ENSMUSG00000050994	Adgb	androglobin
chr5	115500176	115500770	595	*	381	2.15945	5.12515	2.32059e-10	ATAC_KO_PBS_unique	73.7655	16.5118	Distal Intergenic	5	115506676	115555987	49312	1	19303	ENSMUST00000067268.14	-5906	ENSMUSG00000029528	Pxn	paxillin
chr10	117872324	117873192	869	*	319	2.15945	5.12515	2.32059e-10	ATAC_KO_PBS_unique	73.7655	16.5118	Distal Intergenic	10	117813871	117846035	32165	2	215449	ENSMUST00000064667.8	-26289	ENSMUSG00000052681	Rap1b	RAS related protein 1b
chr15	10771185	10771668	484	*	310	2.15945	5.12515	2.32059e-10	ATAC_KO_PBS_unique	73.7655	16.5118	Intron (ENSMUST00000180604.1/75259, intron 5 of 6)	15	10814792	10835214	20423	1	100502601	ENSMUST00000227059.1	-43124	NA	Gm19276	predicted gene, 19276
chr15	50697789	50698384	596	*	90	2.12925	5.10837	2.33894e-10	ATAC_KO_PBS_unique	72.1534	16.4926	Intron (ENSMUST00000165201.8/83925, intron 4 of 5)	15	50819499	50827521	8023	2	83925	ENSMUST00000183421.1	129137	ENSMUSG00000038679	Trps1	transcriptional repressor GATA binding 1
chr18	37934782	37935916	1135	*	721	1.10786	6.9771	2.3821e-10	merged_common	184.955	85.8157	Promoter	18	37843601	37935476	91876	2	13367	ENSMUST00000115634.7	0	ENSMUSG00000024456	Diaph1	diaphanous related formin 1
chr12	29290788	29291489	702	*	301	0.95774	7.3673	2.42753e-10	merged_common	230.108	118.474	Distal Intergenic	12	29141929	29199768	57840	1	102633526	ENSMUST00000222225.1	148859	NA	Gm31333	predicted gene, 31333
chr7	75371888	75372344	457	*	241	-1.42708	6.26812	2.51373e-10	merged_common	46.9997	126.383	Distal Intergenic	7	75114894	75309262	194369	2	64176	ENSMUST00000165175.7	-62626	ENSMUSG00000053025	Sv2b	synaptic vesicle glycoprotein 2 b
chr3	149393343	149394308	966	*	717	1.57433	5.9674	2.52542e-10	merged_common	107.976	36.2582	Intron (ENSMUST00000199007.4/ENSMUST00000199007.4, intron 1 of 3)	3	148816093	148990555	174463	2	99633	ENSMUST00000200543.4	-402788	ENSMUSG00000028184	Adgrl2	adhesion G protein-coupled receptor L2
chr7	19935087	19935883	797	*	184	1.83763	5.51809	2.5963e-10	ATAC_KO_PBS_unique	86.6366	24.2393	Downstream (1-2kb)	7	19938182	19944898	6717	2	70080	ENSMUST00000208210.1	9015	ENSMUSG00000040498	Igsf23	immunoglobulin superfamily, member 23
chr10	99169587	99170191	605	*	307	1.64769	5.83311	2.75343e-10	ATAC_KO_PBS_unique	100.912	32.2062	Intron (ENSMUST00000020113.14/382406, intron 10 of 11)	10	99171284	99197028	25745	1	382406	ENSMUST00000162704.1	-1093	ENSMUSG00000019952	Poc1b	POC1 centriolar protein B
chr2	160070446	160070814	369	*	139	1.73397	5.68453	2.80113e-10	merged_common	93.7999	28.1985	Distal Intergenic	2	160016653	160040619	23967	1	71613	ENSMUST00000140319.1	53793	ENSMUSG00000086653	9130015L21Rik	RIKEN cDNA 9130015L21 gene
chr16	88480165	88480440	276	*	151	2.5214	4.61801	2.88019e-10	ATAC_KO_PBS_unique	58.8394	10.2483	Distal Intergenic	16	88505807	88506978	1172	2	239931	ENSMUST00000069549.2	26538	ENSMUSG00000055811	Cldn17	claudin 17
chr18	70522015	70522759	745	*	295	1.55845	6.01292	2.89429e-10	merged_common	110.825	37.627	3' UTR	18	70516786	70516889	104	1	102466152	ENSMUST00000184246.1	5229	ENSMUSG00000098721	Mir6357	microRNA 6357
chr13	64397940	64398498	559	*	287	1.94147	5.40689	3.00562e-10	ATAC_KO_PBS_unique	83.1489	21.6479	Distal Intergenic	13	64359337	64370890	11554	2	13039	ENSMUST00000222517.1	-27050	ENSMUSG00000021477	Ctsl	cathepsin L
chr14	8099421	8100199	779	*	491	1.78173	5.63981	3.09646e-10	ATAC_KO_PBS_unique	92.4547	26.889	Intron (ENSMUST00000036682.8/218699, intron 1 of 17)	14	8098255	8165111	66857	1	218699	ENSMUST00000225653.1	1166	ENSMUSG00000033885	Pxk	PX domain containing serine/threonine kinase
chr6	28421361	28422193	833	*	358	1.38041	6.33455	3.33253e-10	merged_common	130.215	50.0169	Promoter	6	28416091	28421724	5634	2	74375	ENSMUST00000090511.3	0	ENSMUSG00000029708	Gcc1	golgi coiled coil 1
chr11	96872563	96873545	983	*	108	-1.97346	5.31468	3.38253e-10	ATAC_Control_PBS_unique	20.0837	78.8703	Intron (ENSMUST00000143569.1/ENSMUST00000143569.1, intron 1 of 2)	11	96854131	96861203	7073	1	56358	ENSMUST00000147710.1	18432	ENSMUSG00000018672	Copz2	coatomer protein complex, subunit zeta 2
chr13	24105320	24105842	523	*	181	2.02011	5.26178	3.54365e-10	ATAC_KO_PBS_unique	77.2699	19.0501	Intron (ENSMUST00000125901.7/68732, intron 2 of 25)	13	24012344	24108584	96241	2	68732	ENSMUST00000125901.7	2742	ENSMUSG00000021338	Carmil1	capping protein regulator and myosin 1 linker 1
chr2	52522958	52523677	720	*	309	1.48867	6.12692	3.61472e-10	merged_common	117.072	41.7176	Intron (ENSMUST00000178799.7/12298, intron 2 of 13)	2	52556187	52556709	523	2	12298	ENSMUST00000132322.1	33032	ENSMUSG00000017412	Cacnb4	calcium channel, voltage-dependent, beta 4 subunit
chr15	41612198	41612761	564	*	233	1.32357	6.42176	3.65153e-10	merged_common	135.631	54.1908	Intron (ENSMUST00000090096.10/170719, intron 2 of 15)	15	41710604	41820380	109777	1	170719	ENSMUST00000229769.1	-97843	ENSMUSG00000022307	Oxr1	oxidation resistance 1
chr1	192762616	192763496	881	*	545	1.33097	6.42587	3.65153e-10	merged_common	136.367	54.2062	Intron (ENSMUST00000128619.7/226861, intron 1 of 11)	1	192736411	192770992	34582	2	226861	ENSMUST00000192946.1	7496	ENSMUSG00000037375	Hhat	hedgehog acyltransferase
chr3	127768874	127769757	884	*	453	1.32357	6.42176	3.65153e-10	merged_common	135.631	54.1908	Intron (ENSMUST00000029662.11/71481, intron 1 of 13)	3	127754850	127780490	25641	2	71481	ENSMUST00000162859.1	10733	ENSMUSG00000028028	Alpk1	alpha-kinase 1
chr9	16046696	16046983	288	*	189	2.77692	4.35712	3.66579e-10	ATAC_KO_PBS_unique	53.6527	7.82809	Intron (ENSMUST00000217308.1/270120, intron 4 of 25)	9	15936701	15957822	21122	2	270120	ENSMUST00000215388.1	-88874	ENSMUSG00000074505	Fat3	FAT atypical cadherin 3
chr11	46076522	46076980	459	*	107	2.07948	5.19131	3.67685e-10	ATAC_KO_PBS_unique	75.1161	17.7724	Intron (ENSMUST00000011400.7/11492, intron 3 of 22)	11	46056058	46065082	9025	1	11492	ENSMUST00000137014.1	20464	ENSMUSG00000011256	Adam19	a disintegrin and metallopeptidase domain 19 (meltrin beta)
chr15	39783706	39784375	670	*	349	2.07948	5.19131	3.67685e-10	ATAC_KO_PBS_unique	75.1161	17.7724	Intron (ENSMUST00000022915.10/64705, intron 9 of 9)	15	39782705	39793251	10547	2	64705	ENSMUST00000155859.1	8876	ENSMUSG00000022304	Dpys	dihydropyrimidinase
chr12	71546952	71547163	212	*	112	2.26228	4.93518	3.77047e-10	ATAC_KO_PBS_unique	67.0107	13.9679	Intron (ENSMUST00000222756.1/73815, intron 5 of 5)	12	71540607	71556133	15527	1	73815	ENSMUST00000220948.1	6345	ENSMUSG00000113630	4930404H11Rik	RIKEN cDNA 4930404H11 gene
chr2	117019143	117019512	370	*	169	2.09833	5.0912	3.82735e-10	ATAC_KO_PBS_unique	70.5398	16.473	Distal Intergenic	2	117121374	117182279	60906	1	114715	ENSMUST00000028829.12	-101862	ENSMUSG00000027351	Spred1	sprouty protein with EVH-1 domain 1, related sequence
chr10	13832597	13833122	526	*	397	2.11388	5.09984	3.82735e-10	ATAC_KO_PBS_unique	71.347	16.4829	Intron (ENSMUST00000162610.7/66253, intron 1 of 5)	10	13653588	13844286	190699	2	66253	ENSMUST00000162174.7	11164	ENSMUSG00000019806	Aig1	androgen-induced 1
chr15	10769570	10770221	652	*	269	2.11388	5.09984	3.82735e-10	ATAC_KO_PBS_unique	71.347	16.4829	Exon (ENSMUST00000226304.1/75259, exon 5 of 5)	15	10814792	10835214	20423	1	100502601	ENSMUST00000227059.1	-44571	NA	Gm19276	predicted gene, 19276
chr15	53400060	53400692	633	*	434	2.18426	5.02014	3.82849e-10	ATAC_KO_PBS_unique	69.1794	15.2212	Distal Intergenic	15	53064038	53346159	282122	2	14042	ENSMUST00000077273.8	-53901	ENSMUSG00000061731	Ext1	exostoses (multiple) 1
chr10	78096034	78096636	603	*	307	1.82521	5.51118	4.06988e-10	ATAC_KO_PBS_unique	85.8523	24.2275	Distal Intergenic	10	78073339	78079525	6187	1	50723	ENSMUST00000219633.1	22695	ENSMUSG00000000732	Icosl	icos ligand
chr11	109480373	109480977	605	*	259	1.8686	5.45307	4.4112e-10	ATAC_KO_PBS_unique	83.7124	22.9237	Intron (ENSMUST00000152252.7/74008, intron 1 of 3)	11	109485023	109489897	4875	1	74008	ENSMUST00000136336.1	-4046	ENSMUSG00000020604	Arsg	arylsulfatase G
chr12	32795691	32796305	615	*	115	1.8686	5.45307	4.4112e-10	ATAC_KO_PBS_unique	83.7124	22.9237	Distal Intergenic	12	32819545	32839207	19663	1	59027	ENSMUST00000220200.1	-23240	ENSMUSG00000020572	Nampt	nicotinamide phosphoribosyltransferase
chr14	22801247	22801856	610	*	298	1.88139	5.46018	4.4112e-10	ATAC_KO_PBS_unique	84.4997	22.9351	Intron (ENSMUST00000075639.10/76633, intron 5 of 6)	14	22596513	22599268	2756	1	76633	ENSMUST00000226003.1	204734	ENSMUSG00000063458	Lrmda	leucine rich melanocyte differentiation associated
chr17	50993171	50994398	1228	*	625	1.03611	7.12604	4.50593e-10	merged_common	200.033	97.5443	Intron (ENSMUST00000024717.9/72238, intron 3 of 21)	17	50953993	50984626	30634	2	72238	ENSMUST00000224123.1	-8545	ENSMUSG00000023923	Tbc1d5	TBC1 domain family, member 5
chr5	124334361	124334859	499	*	285	-1.40562	6.28005	4.55614e-10	merged_common	47.7437	126.488	Intron (ENSMUST00000111477.1/72650, intron 1 of 1)	5	124328098	124341844	13747	1	72650	ENSMUST00000077376.2	6263	ENSMUSG00000047635	2810006K23Rik	RIKEN cDNA 2810006K23 gene
chr11	90224790	90225829	1040	*	394	1.30067	6.48361	4.56612e-10	merged_common	140.453	57.0152	Intron (ENSMUST00000124877.2/ENSMUST00000124877.2, intron 2 of 3)	11	90249456	90268465	19010	1	67468	ENSMUST00000107887.7	-23627	ENSMUSG00000003948	Mmd	monocyte to macrophage differentiation-associated
chr17	12249593	12250814	1222	*	582	0.97688	7.28193	4.6819e-10	merged_common	218.331	110.929	Exon (ENSMUST00000233755.1/26407, exon 12 of 26)	17	12261380	12265986	4607	2	26407	ENSMUST00000233252.1	15172	ENSMUSG00000014426	Map3k4	mitogen-activated protein kinase kinase kinase 4
chr6	53572965	53573633	669	*	256	1.25186	6.56222	4.72469e-10	merged_common	145.831	61.2352	Promoter	6	53573300	53700367	127068	1	231991	ENSMUST00000205120.2	0	ENSMUSG00000053007	Creb5	cAMP responsive element binding protein 5
chr9	70942686	70943300	615	*	172	1.92842	5.39964	4.75174e-10	ATAC_KO_PBS_unique	82.3588	21.637	Intron (ENSMUST00000216798.1/15450, intron 1 of 8)	9	70798128	70934808	136681	2	15450	ENSMUST00000034731.9	-7878	ENSMUSG00000032207	Lipc	lipase, hepatic
chr19	46617972	46618733	762	*	562	1.75854	5.62692	4.7878e-10	ATAC_KO_PBS_unique	90.8988	26.8649	Intron (ENSMUST00000138302.8/226178, intron 1 of 3)	19	46623401	46652522	29122	1	226178	ENSMUST00000156649.1	-4668	ENSMUSG00000047731	Wbp1l	WW domain binding protein 1 like
chr17	24006981	24007873	893	*	357	1.48376	6.07487	4.82618e-10	merged_common	112.732	40.3079	Distal Intergenic	17	23993534	23998100	4567	2	70835	ENSMUST00000041649.7	-8881	ENSMUSG00000045027	Prss22	protease, serine 22
chr2	70091572	70092465	894	*	410	1.61859	5.87744	4.92064e-10	merged_common	103.017	33.5478	Intron (ENSMUST00000060208.10/329421, intron 2 of 34)	2	70096298	70183267	86970	1	329421	ENSMUST00000112241.1	-3833	ENSMUSG00000042064	Myo3b	myosin IIIB
chr10	51534590	51535042	453	*	316	2.50188	4.60716	4.92554e-10	ATAC_KO_PBS_unique	58.0048	10.2405	Distal Intergenic	10	51495216	51496601	1386	1	14728	ENSMUST00000218753.1	39374	ENSMUSG00000062593	Lilrb4a	leukocyte immunoglobulin-like receptor, subfamily B, member 4A
chr10	118097637	118098302	666	*	468	1.69987	5.7338	5.30037e-10	ATAC_KO_PBS_unique	95.9184	29.525	Distal Intergenic	10	118141811	118146760	4950	1	17245	ENSMUST00000219827.1	-43509	ENSMUSG00000020212	Mdm1	transformed mouse 3T3 cell double minute 1
chr18	73501791	73502479	689	*	301	1.47987	6.12203	5.31978e-10	merged_common	116.321	41.7034	Distal Intergenic	18	73573044	73592575	19532	1	240396	ENSMUST00000091852.4	-70565	ENSMUSG00000037253	Mex3c	mex3 RNA binding family member C
chr5	112276104	112277431	1328	*	462	-0.77265	7.91888	5.50702e-10	merged_common	185.151	316.312	Promoter	5	112276691	112315361	38671	1	22022	ENSMUST00000031287.10	0	ENSMUSG00000029344	Tpst2	protein-tyrosine sulfotransferase 2
chrX	13632474	13632890	417	*	243	-1.97989	5.26178	5.6846e-10	merged_common	19.3175	76.2003	Promoter	20	13632769	13640858	8090	1	23890	ENSMUST00000096492.3	0	ENSMUSG00000040229	Gpr34	G protein-coupled receptor 34
chr2	49349506	49350400	895	*	493	2.00592	5.2539	5.6846e-10	ATAC_KO_PBS_unique	76.472	19.0397	Distal Intergenic	2	49279623	49316886	37264	1	109241	ENSMUST00000196831.1	69883	ENSMUSG00000036792	Mbd5	methyl-CpG binding domain protein 5
chr2	69015204	69015664	461	*	113	2.00592	5.2539	5.6846e-10	ATAC_KO_PBS_unique	76.472	19.0397	Intron (ENSMUST00000028426.8/241447, intron 4 of 9)	2	68959911	69051328	91418	1	241447	ENSMUST00000141498.1	55293	ENSMUSG00000027035	Cers6	ceramide synthase 6
chr17	12030919	12031913	995	*	524	2.04997	5.17492	5.9304e-10	ATAC_KO_PBS_unique	73.5118	17.7523	Intron (ENSMUST00000191124.6/50873, intron 10 of 11)	17	12029916	12063358	33443	1	50873	ENSMUST00000190894.1	1003	ENSMUSG00000023826	Prkn	parkin RBR E3 ubiquitin protein ligase
chr18	74879819	74880415	597	*	322	2.04997	5.17492	5.9304e-10	ATAC_KO_PBS_unique	73.5118	17.7523	Distal Intergenic	18	74939322	74961263	21942	2	16891	ENSMUST00000066532.4	80848	ENSMUSG00000053846	Lipg	lipase, endothelial
chr9	120001806	120002596	791	*	477	1.67768	5.72147	5.94032e-10	ATAC_KO_PBS_unique	94.3735	29.4997	Intron (ENSMUST00000177637.1/13051, intron 2 of 2)	9	119974261	119984658	10398	2	215418	ENSMUST00000213936.1	-17148	ENSMUSG00000032515	Csrnp1	cysteine-serine-rich nuclear protein 1
chr5	53450648	53451570	923	*	471	1.67768	5.72147	5.94032e-10	merged_common	94.3735	29.4997	Distal Intergenic	5	53466152	53649390	183239	1	19664	ENSMUST00000201991.3	-14582	ENSMUSG00000039191	Rbpj	recombination signal binding protein for immunoglobulin kappa J region
chr7	117494796	117495198	403	*	324	2.1518	5.00211	6.28967e-10	ATAC_KO_PBS_unique	67.5559	15.2022	Intron (ENSMUST00000160035.7/233781, intron 2 of 6)	7	117475492	117549359	73868	1	233781	ENSMUST00000161889.1	19304	ENSMUSG00000030657	Xylt1	xylosyltransferase 1
chr10	40077689	40077939	251	*	85	2.1518	5.00211	6.28967e-10	ATAC_KO_PBS_unique	67.5559	15.2022	Intron (ENSMUST00000092566.7/72472, intron 2 of 5)	10	40037299	40076605	39307	2	72472	ENSMUST00000213827.1	-1084	ENSMUSG00000019838	Slc16a10	solute carrier family 16 (monocarboxylic acid transporters), member 10
chr17	28294298	28295256	959	*	365	-0.92934	7.39232	6.33187e-10	merged_common	121.739	231.841	Exon (ENSMUST00000233383.1/ENSMUST00000233383.1, exon 1 of 1)	17	28313519	28326572	13054	1	72775	ENSMUST00000114803.8	-18263	ENSMUSG00000007570	Fance	Fanconi anemia, complementation group E
chr12	58537979	58538858	880	*	560	1.53963	6.00246	6.41017e-10	ATAC_KO_PBS_unique	109.309	37.5996	Distal Intergenic	12	58264720	58269290	4571	2	66864	ENSMUST00000062254.3	-268689	ENSMUSG00000045930	Clec14a	C-type lectin domain family 14, member a
chr17	34118815	34123017	4203	*	739	-0.81739	7.74197	6.51927e-10	merged_common	161.263	284.181	Promoter	17	34112023	34121747	9725	2	14312	ENSMUST00000114242.8	0	ENSMUSG00000024335	Brd2	bromodomain containing 2
chr2	11708258	11709051	794	*	322	0.96583	7.25588	6.63533e-10	merged_common	213.604	109.362	Intron (ENSMUST00000138349.7/16169, intron 1 of 6)	2	11705848	11733249	27402	1	16169	ENSMUST00000114832.2	2410	ENSMUSG00000023206	Il15ra	interleukin 15 receptor, alpha chain
chr18	35707443	35708422	980	*	484	-0.98884	7.19884	6.76356e-10	merged_common	104.287	206.967	Intron (ENSMUST00000143778.1/73449, intron 1 of 2)	18	35703225	35729770	26546	1	73449	ENSMUST00000143778.1	4218	ENSMUSG00000073598	1700066B19Rik	RIKEN cDNA 1700066B19 gene
chr2	79180594	79181412	819	*	341	1.74679	5.6204	7.38458e-10	ATAC_KO_PBS_unique	90.1212	26.8529	Distal Intergenic	2	79255426	79257852	2427	1	16401	ENSMUST00000155105.1	-74014	ENSMUSG00000027009	Itga4	integrin alpha 4
chr12	17681924	17682548	625	*	364	1.60841	5.87179	7.39892e-10	ATAC_KO_PBS_unique	102.253	33.5348	Distal Intergenic	12	17690856	17791933	101078	1	53602	ENSMUST00000071858.4	-8308	ENSMUSG00000071379	Hpcal1	hippocalcin-like 1
chr5	22889435	22889705	271	*	172	2.6076	4.4771	7.46489e-10	ATAC_KO_PBS_unique	54.9825	9.02108	Intron (ENSMUST00000197992.1/269629, intron 1 of 3)	5	22738910	22746887	7978	2	330052	ENSMUST00000199056.1	-142548	ENSMUSG00000105076	A930003O13Rik	RIKEN cDNA A930003O13 gene
chr11	61743796	61744253	458	*	256	-1.3051	6.41486	7.4678e-10	merged_common	54.2785	134.123	Intron (ENSMUST00000168115.7/212627, intron 6 of 10)	11	61729654	61762012	32359	2	212627	ENSMUST00000151966.7	17759	ENSMUSG00000020528	Prpsap2	phosphoribosyl pyrophosphate synthetase-associated protein 2
chr2	103282138	103282860	723	*	373	-1.45445	6.11786	7.81133e-10	merged_common	41.9511	114.968	Promoter	2	103266511	103283760	17250	2	13661	ENSMUST00000111174.7	900	ENSMUSG00000012350	Ehf	ets homologous factor
chr13	4771288	4771956	669	*	349	1.46208	6.11215	7.81133e-10	merged_common	114.817	41.675	Exon (ENSMUST00000065956.4/ENSMUST00000065956.4, exon 1 of 3)	13	4590757	4609174	18418	2	56043	ENSMUST00000110691.9	-162114	ENSMUSG00000045410	Akr1e1	aldo-keto reductase family 1, member E1
chr9	13671179	13671716	538	*	226	1.68882	5.72766	8.07676e-10	merged_common	95.1459	29.5124	Intron (ENSMUST00000159294.8/270118, intron 2 of 4)	9	13662460	13707345	44886	1	270118	ENSMUST00000177755.2	8719	ENSMUSG00000031925	Maml2	mastermind like transcriptional coactivator 2
chr3	152401952	152402242	291	*	219	1.78471	5.56689	8.18597e-10	ATAC_KO_PBS_unique	87.9886	25.5373	Intron (ENSMUST00000106103.7/108946, intron 1 of 12)	3	152396694	152462826	66133	1	108946	ENSMUST00000106101.1	5258	ENSMUSG00000039068	Zzz3	zinc finger, ZZ domain containing 3
chr18	53263790	53264487	698	*	527	1.78471	5.56689	8.18597e-10	ATAC_KO_PBS_unique	87.9886	25.5373	Intron (ENSMUST00000165032.7/69226, intron 1 of 6)	18	53245769	53390823	145055	1	69226	ENSMUST00000025417.8	18021	ENSMUSG00000024535	Snx24	sorting nexing 24
chr8	11767259	11767865	607	*	354	1.49704	6.03136	8.23759e-10	merged_common	109.887	38.9308	Intron (ENSMUST00000210104.1/54126, intron 3 of 4)	8	11758391	11805323	46933	1	54126	ENSMUST00000210012.1	8868	ENSMUSG00000031511	Arhgef7	Rho guanine nucleotide exchange factor (GEF7)
chr4	79873887	79874561	675	*	291	1.92391	5.30551	8.59334e-10	ATAC_KO_PBS_unique	77.0362	20.3021	Exon (ENSMUST00000118621.1/ENSMUST00000118621.1, exon 1 of 1)	4	80834123	80837684	3562	1	22178	ENSMUST00000133655.7	-959562	ENSMUSG00000005994	Tyrp1	tyrosinase-related protein 1
chr8	72815667	72816114	448	*	167	1.97706	5.23787	9.09536e-10	ATAC_KO_PBS_unique	74.8744	19.0186	3' UTR	8	72761880	72763874	1995	1	14065	ENSMUST00000058099.8	53787	ENSMUSG00000050147	F2rl3	coagulation factor II (thrombin) receptor-like 3
chr12	17657509	17658104	596	*	232	1.97706	5.23787	9.09536e-10	ATAC_KO_PBS_unique	74.8744	19.0186	Distal Intergenic	12	17690856	17791933	101078	1	53602	ENSMUST00000071858.4	-32752	ENSMUSG00000071379	Hpcal1	hippocalcin-like 1
chr3	41408337	41408725	389	*	283	2.37344	4.7047	9.16423e-10	ATAC_KO_PBS_unique	59.36	11.4556	Distal Intergenic	3	41487679	41493190	5512	2	78706	ENSMUST00000199155.1	84465	ENSMUSG00000097639	Platr4	pluripotency associated transcript 4
chr10	121364729	121366499	1771	*	1386	1.23812	6.55459	9.38245e-10	merged_common	144.372	61.203	Promoter	10	121365090	121397245	32156	1	75612	ENSMUST00000040344.6	0	ENSMUSG00000034707	Gns	glucosamine (N-acetyl)-6-sulfatase
chr7	129401383	129401627	245	*	182	3.04789	3.96832	9.40918e-10	ATAC_KO_PBS_unique	45.0129	5.4429	Exon (ENSMUST00000206093.1/ENSMUST00000206093.1, exon 2 of 2)	7	129257055	129391019	133965	1	381925	ENSMUST00000205896.1	144328	ENSMUSG00000070366	Plpp4	phospholipid phosphatase 4
chr9	9653413	9654008	596	*	290	1.60546	5.80965	9.57687e-10	ATAC_KO_PBS_unique	97.8419	32.1539	Distal Intergenic	9	9894431	9894521	91	1	102466147	ENSMUST00000183808.1	-240423	ENSMUSG00000098408	Mir6237	microRNA 6237
chr10	96616242	96618630	2389	*	666	-0.63569	8.4194	9.6473e-10	merged_common	274.67	426.749	Promoter	10	96617006	96622809	5804	1	12226	ENSMUST00000038377.8	0	ENSMUSG00000036478	Btg1	B cell translocation gene 1, anti-proliferative
chr10	91299981	91300430	450	*	233	1.79999	5.49718	9.9252e-10	ATAC_KO_PBS_unique	84.2833	24.2042	Distal Intergenic	10	91208258	91220642	12385	2	102633753	ENSMUST00000216311.1	-79339	NA	4930534H03Rik	RIKEN cDNA 4930534H03 gene
chr10	96337772	96338371	600	*	432	2.31433	4.82463	1.01064e-09	ATAC_KO_PBS_unique	63.1975	12.7062	Intron (ENSMUST00000218518.1/ENSMUST00000218518.1, intron 1 of 2)	10	96226207	96248708	22502	1	74881	ENSMUST00000218720.1	111565	ENSMUSG00000112762	4930459C07Rik	RIKEN cDNA 4930459C07 gene
chr9	88709376	88710150	775	*	639	2.06666	5.0736	1.01694e-09	ATAC_KO_PBS_unique	68.9238	16.4529	Intron (ENSMUST00000113110.4/100039707, intron 2 of 2)	9	88688606	88716210	27605	2	100039707	ENSMUST00000185519.6	6060	ENSMUSG00000079427	Mthfsl	5, 10-methenyltetrahydrofolate synthetase-like
chr12	71546644	71546837	194	*	99	2.21135	4.90689	1.0292e-09	ATAC_KO_PBS_unique	64.5598	13.9405	Intron (ENSMUST00000222756.1/73815, intron 5 of 5)	12	71540607	71556133	15527	1	73815	ENSMUST00000220948.1	6037	ENSMUSG00000113630	4930404H11Rik	RIKEN cDNA 4930404H11 gene
chr1	39754387	39755147	761	*	421	1.63509	5.76325	1.08572e-09	ATAC_KO_PBS_unique	95.7231	30.8181	Distal Intergenic	1	39665301	39720997	55697	2	619289	ENSMUST00000151913.2	-33390	ENSMUSG00000057173	Rfx8	regulatory factor X 8
chr4	116787895	116788725	831	*	305	1.64605	5.76934	1.08572e-09	ATAC_KO_PBS_unique	96.4938	30.8311	Intron (ENSMUST00000045542.12/230661, intron 4 of 10)	4	116771763	116802263	30501	1	230661	ENSMUST00000142529.1	16132	ENSMUSG00000033985	Tesk2	testis-specific kinase 2
chr9	14842287	14842920	634	*	335	1.63509	5.76325	1.08572e-09	merged_common	95.7231	30.8181	Distal Intergenic	9	14860210	14870789	10580	1	14608	ENSMUST00000034408.11	-17290	ENSMUSG00000031932	Gpr83	G protein-coupled receptor 83
chr14	22019314	22020895	1582	*	470	1.29362	6.44285	1.08692e-09	merged_common	136.207	55.5625	Promoter	14	22019712	23056085	1036374	1	76633	ENSMUST00000075639.10	0	ENSMUSG00000063458	Lrmda	leucine rich melanocyte differentiation associated
chr10	96273968	96274399	432	*	244	1.73493	5.61381	1.13609e-09	ATAC_KO_PBS_unique	89.3425	26.8406	Distal Intergenic	10	96226207	96248708	22502	1	74881	ENSMUST00000218720.1	47761	ENSMUSG00000112762	4930459C07Rik	RIKEN cDNA 4930459C07 gene
chrX	166230875	166231160	286	*	134	3.29142	3.74593	1.1595e-09	ATAC_KO_PBS_unique	41.9803	4.28775	Distal Intergenic	20	166238911	166388988	150078	1	14758	ENSMUST00000112235.7	-7751	ENSMUSG00000031342	Gpm6b	glycoprotein m6b
chr16	33077109	33077739	631	*	198	1.36603	6.28493	1.17158e-09	merged_common	125.187	48.5673	Intron (ENSMUST00000023497.2/239833, intron 6 of 16)	16	33091286	33104882	13597	1	239833	ENSMUST00000153549.1	-13547	ENSMUSG00000022802	Lmln	leishmanolysin-like (metallopeptidase M8 family)
chr11	116436479	116437463	985	*	503	1.36603	6.28493	1.17158e-09	merged_common	125.187	48.5673	Intron (ENSMUST00000057676.6/319370, intron 2 of 2)	11	116434509	116438223	3715	1	664849	ENSMUST00000144310.1	1970	NA	Gm7367	1110014K08Rik pseudogene
chr6	38155144	38155703	560	*	312	-1.89338	5.38326	1.17853e-09	ATAC_Control_PBS_unique	21.6541	80.4461	Exon (ENSMUST00000117556.7/330286, exon 12 of 20)	6	38126014	38147431	21418	2	330286	ENSMUST00000127925.7	-7713	ENSMUSG00000063455	D630045J12Rik	RIKEN cDNA D630045J12 gene
chr12	65172202	65173337	1136	*	506	0.82043	7.67092	1.19781e-09	merged_common	270.81	153.352	Promoter	12	65132734	65172580	39847	2	217653	ENSMUST00000052201.8	0	ENSMUSG00000047534	Mis18bp1	MIS18 binding protein 1
chr1	183979561	183980453	893	*	376	1.01699	7.07026	1.21792e-09	merged_common	191.176	94.4687	Distal Intergenic	1	184013302	184037274	23973	1	63953	ENSMUST00000139839.1	-32849	ENSMUSG00000039384	Dusp10	dual specificity phosphatase 10
chrY	90797248	90798029	782	*	268	-1.36666	6.21862	1.30752e-09	merged_common	46.3755	119.59	Intron (ENSMUST00000179483.7/170942, intron 3 of 3)	21	90785586	90816464	30879	1	170942	ENSMUST00000179077.1	11662	ENSMUSG00000096768	Erdr1	erythroid differentiation regulator 1
chr13	110394277	110395519	1243	*	686	1.12829	6.77441	1.39952e-09	merged_common	161.855	74.0416	Promoter	13	110395046	110400844	5799	1	20620	ENSMUST00000022212.8	0	ENSMUSG00000021701	Plk2	polo like kinase 2
chr7	120205523	120206302	780	*	614	1.73524	5.53941	1.40004e-09	ATAC_KO_PBS_unique	84.861	25.4888	Intron (ENSMUST00000143257.7/67928, intron 1 of 16)	7	120204007	120216406	12400	1	67928	ENSMUST00000134268.1	1516	ENSMUSG00000062017	Abca14	ATP-binding cassette, sub-family A (ABC1), member 14
chr4	102624749	102625468	720	*	414	1.51088	5.98649	1.4064e-09	merged_common	107.034	37.558	Distal Intergenic	4	102589843	102603441	13599	1	18578	ENSMUST00000106901.1	34906	ENSMUSG00000028525	Pde4b	phosphodiesterase 4B, cAMP specific
chr3	28171201	28171562	362	*	296	2.46192	4.58496	1.42966e-09	ATAC_KO_PBS_unique	56.3334	10.2248	Distal Intergenic	3	28109759	28130795	21037	1	18805	ENSMUST00000126594.2	61442	ENSMUSG00000027695	Pld1	phospholipase D1
chr2	163642494	163643552	1059	*	421	-0.83269	7.6348	1.43445e-09	merged_common	148.926	265.238	Exon (ENSMUST00000129854.1/26943, exon 2 of 4)	2	163644850	163645800	951	1	68386	ENSMUST00000076667.1	-1298	ENSMUSG00000058812	0610039K10Rik	RIKEN cDNA 0610039K10 gene
chr6	57768914	57769503	590	*	122	1.45604	6.05947	1.54455e-09	merged_common	110.468	40.2649	Intron (ENSMUST00000127485.7/232023, intron 3 of 4)	6	57762567	57824640	62074	2	232023	ENSMUST00000143953.2	55137	ENSMUSG00000037788	Vopp1	vesicular, overexpressed in cancer, prosurvival protein 1
chr2	102867815	102868092	278	*	68	2.33468	4.68316	1.54483e-09	ATAC_KO_PBS_unique	57.7	11.4384	Intron (ENSMUST00000005218.14/12505, intron 1 of 18)	2	102814133	102901346	87214	2	12505	ENSMUST00000111192.2	33254	ENSMUSG00000005087	Cd44	CD44 antigen
chr14	60750462	60750819	358	*	63	1.67625	5.65246	1.55604e-09	ATAC_KO_PBS_unique	89.9209	28.1358	Promoter	14	60751077	60762666	11590	1	219140	ENSMUST00000162939.1	-258	ENSMUSG00000021990	Spata13	spermatogenesis associated 13
chr2	29771986	29772438	453	*	328	2.05053	5.06464	1.65104e-09	ATAC_KO_PBS_unique	68.1152	16.4427	Intron (ENSMUST00000113807.9/227682, intron 6 of 6)	2	29779211	29782196	2986	2	227682	ENSMUST00000148120.1	9758	ENSMUSG00000039826	Trub2	TruB pseudouridine (psi) synthase family member 2
chr11	96906419	96906878	460	*	383	-2.07176	5.05295	1.65104e-09	ATAC_Control_PBS_unique	16.1904	68.0645	Downstream (<1kb)	11	96907816	96908758	943	2	80280	ENSMUST00000154289.1	1880	ENSMUSG00000018669	Cdk5rap3	CDK5 regulatory subunit associated protein 3
chr1	71938430	71939044	615	*	306	2.29642	4.81468	1.67554e-09	ATAC_KO_PBS_unique	62.3747	12.6975	Distal Intergenic	1	71888503	71890587	2085	1	667931	ENSMUST00000188676.1	49927	ENSMUSG00000099707	Gm8883	predicted gene 8883
chr11	32349640	32349956	317	*	235	2.27826	4.80459	1.67554e-09	ATAC_KO_PBS_unique	61.5514	12.6886	Intron (ENSMUST00000038753.5/268396, intron 1 of 12)	11	32347840	32390300	42461	1	268396	ENSMUST00000138771.1	1800	ENSMUSG00000040711	Sh3pxd2b	SH3 and PX domains 2B
chr10	19186007	19186671	665	*	98	1.35789	6.28041	1.6833e-09	merged_common	124.444	48.5522	Intron (ENSMUST00000216041.1/100504265, intron 2 of 3)	10	19167238	19206702	39465	1	100504265	ENSMUST00000216683.1	18769	NA	Gm20139	predicted gene, 20139
chr13	81136010	81137309	1300	*	753	0.98088	7.16079	1.69703e-09	merged_common	201.025	101.853	Intron (ENSMUST00000128120.1/110789, intron 5 of 7)	13	81051181	81078963	27783	1	319983	ENSMUST00000223730.1	84829	ENSMUSG00000097098	9330111N05Rik	RIKEN cDNA 9330111N05 gene
chr8	39619567	39620657	1091	*	420	0.98302	7.14046	1.81148e-09	merged_common	198.359	100.354	Exon (ENSMUST00000026021.13/20288, exon 5 of 10)	8	39581685	39642620	60936	2	20288	ENSMUST00000026021.13	21963	ENSMUSG00000025044	Msr1	macrophage scavenger receptor 1
chr19	21126621	21127881	1261	*	888	1.2116	6.5736	1.83665e-09	merged_common	144.949	62.5874	Distal Intergenic	19	21272278	21282289	10012	1	22682	ENSMUST00000025659.10	-144397	ENSMUSG00000024750	Zfand5	zinc finger, AN1-type domain 5
chr10	88356853	88357619	767	*	223	1.5052	5.92899	1.87277e-09	merged_common	102.65	36.1617	Promoter	10	88322804	88356996	34193	2	71712	ENSMUST00000156097.1	0	ENSMUSG00000020057	Dram1	DNA-damage regulated autophagy modulator 1
chr1	138322742	138323467	726	*	207	1.55625	5.84281	1.90086e-09	ATAC_KO_PBS_unique	98.4238	33.4674	Distal Intergenic	1	138273738	138289462	15725	1	338375	ENSMUST00000027643.5	49004	ENSMUSG00000026394	Atp6v1g3	ATPase, H+ transporting, lysosomal V1 subunit G3
chr17	34602979	34605055	2077	*	831	-0.54168	8.80689	1.91071e-09	merged_common	371.199	540.342	Promoter	17	34601091	34603690	2600	2	54197	ENSMUST00000015622.7	0	ENSMUSG00000015478	Rnf5	ring finger protein 5
chr3	41575206	41575571	366	*	150	-1.50222	5.98199	2.07566e-09	merged_common	37.5536	106.381	Intron (ENSMUST00000026865.14/269424, intron 1 of 10)	3	41580856	41589003	8148	1	269424	ENSMUST00000195200.1	-5285	ENSMUSG00000025764	Jade1	jade family PHD finger 1
chr10	24634188	24634827	640	*	186	1.49135	5.97564	2.07566e-09	merged_common	105.516	37.5298	Distal Intergenic	10	24595780	24596370	591	1	14219	ENSMUST00000129142.1	38408	ENSMUSG00000019997	Ccn2	cellular communication network factor 2
chr3	55651998	55652825	828	*	484	1.40572	6.12869	2.08908e-09	merged_common	113.894	42.987	Intron (ENSMUST00000029374.7/26422, intron 49 of 57)	3	55625199	55690940	65742	2	26422	ENSMUST00000199803.4	38115	ENSMUSG00000027799	Nbea	neurobeachin
chr3	131698149	131698640	492	*	145	1.62047	5.68969	2.10498e-09	ATAC_KO_PBS_unique	90.505	29.4349	Distal Intergenic	3	131564935	131583200	18266	1	23971	ENSMUST00000196638.1	133214	ENSMUSG00000028032	Papss1	3'-phosphoadenosine 5'-phosphosulfate synthase 1
chr15	91171863	91172702	840	*	556	1.63211	5.69616	2.10498e-09	ATAC_KO_PBS_unique	91.2793	29.4481	Promoter	15	91159111	91172185	13075	2	26874	ENSMUST00000229909.1	0	ENSMUSG00000055782	Abcd2	ATP-binding cassette, sub-family D (ALD), member 2
chr17	78891092	78891346	255	*	64	3.26224	3.72972	2.11735e-09	ATAC_KO_PBS_unique	41.0936	4.28294	Exon (ENSMUST00000180880.1/ENSMUST00000180880.1, exon 3 of 3)	17	78884897	78895100	10204	2	73671	ENSMUST00000146474.7	3754	ENSMUSG00000038045	Sult6b1	sulfotransferase family, cytosolic, 6B, member 1
chr7	84142789	84143618	830	*	477	1.54043	5.89232	2.15626e-09	ATAC_KO_PBS_unique	101.303	34.8263	Intron (ENSMUST00000117085.1/70178, intron 1 of 2)	7	84114251	84147815	33565	2	70178	ENSMUST00000131505.1	4197	ENSMUSG00000038459	Abhd17c	abhydrolase domain containing 17C
chr1	182108330	182108960	631	*	331	1.88086	5.2816	2.16015e-09	ATAC_KO_PBS_unique	74.6479	20.2685	Distal Intergenic	1	182124737	182131919	7183	1	27058	ENSMUST00000111018.1	-15777	ENSMUSG00000026511	Srp9	signal recognition particle 9
chr3	31389809	31390414	606	*	335	1.89537	5.28966	2.16015e-09	ATAC_KO_PBS_unique	75.4446	20.2798	Distal Intergenic	3	31202858	31310378	107521	2	241919	ENSMUST00000091259.8	-79431	ENSMUSG00000069072	Slc7a14	solute carrier family 7 (cationic amino acid transporter, y+ system), member 14
chr15	58754705	58755564	860	*	509	1.57286	5.79154	2.17144e-09	ATAC_KO_PBS_unique	95.5358	32.1135	Distal Intergenic	15	58782269	58823530	41262	2	74868	ENSMUST00000072113.5	67966	ENSMUSG00000062373	Tmem65	transmembrane protein 65
chr18	4354265	4355209	945	*	513	1.58381	5.79763	2.17144e-09	merged_common	96.3047	32.1272	Promoter	18	4353644	4380723	27080	1	73915	ENSMUST00000234586.1	621	ENSMUSG00000117401	4833419F23Rik	RIKEN cDNA 4833419F23 gene
chr8	127440533	127441538	1006	*	816	1.2713	6.43045	2.17669e-09	merged_common	134.001	55.5148	Intron (ENSMUST00000162309.7/93742, intron 20 of 24)	8	127447746	127474513	26768	1	93742	ENSMUST00000159511.1	-6208	ENSMUSG00000025812	Pard3	par-3 family cell polarity regulator
chr1	91080105	91080895	791	*	446	1.23615	6.48379	2.19018e-09	merged_common	137.364	58.3118	Intron (ENSMUST00000189505.6/16978, intron 6 of 12)	1	91053586	91128287	74702	1	16978	ENSMUST00000189617.2	26519	ENSMUSG00000026305	Lrrfip1	leucine rich repeat (in FLII) interacting protein 1
chr2	130929977	130930329	353	*	168	2.56502	4.45345	2.19948e-09	ATAC_KO_PBS_unique	53.2962	9.00633	Intron (ENSMUST00000028781.8/11990, intron 1 of 28)	2	130906931	130935932	29002	1	11990	ENSMUST00000156982.1	23046	ENSMUSG00000027312	Atrn	attractin
chr10	17772072	17772984	913	*	572	1.43722	6.04902	2.26534e-09	merged_common	108.958	40.2359	Distal Intergenic	10	17796226	17807908	11683	1	378431	ENSMUST00000175676.1	-23242	ENSMUSG00000039891	Txlnb	taxilin beta
chr1	166429648	166430565	918	*	385	1.13238	6.7478	2.28685e-09	merged_common	159.122	72.5855	Distal Intergenic	1	166396169	166409863	13695	2	71592	ENSMUST00000128861.2	-19785	ENSMUSG00000040596	Pogk	pogo transposable element with KRAB domain
chr6	146776603	146777004	402	*	197	1.66439	5.64587	2.37361e-09	ATAC_KO_PBS_unique	89.144	28.1229	3' UTR	6	146796065	146833529	37465	1	272322	ENSMUST00000111639.7	-19061	ENSMUSG00000040187	Arntl2	aryl hydrocarbon receptor nuclear translocator-like 2
chr6	134130639	134131189	551	*	326	1.66439	5.64587	2.37361e-09	merged_common	89.144	28.1229	Intron (ENSMUST00000081028.12/14011, intron 1 of 7)	6	134035969	134248284	212316	1	14011	ENSMUST00000164648.1	94670	ENSMUSG00000030199	Etv6	ets variant 6
chr14	25789134	25789810	677	*	298	1.66439	5.64587	2.37361e-09	merged_common	89.144	28.1229	Distal Intergenic	14	25711642	25769039	57398	2	71918	ENSMUST00000069180.7	-20095	ENSMUSG00000055538	Zcchc24	zinc finger, CCHC domain containing 24
chr10	93268209	93268804	596	*	294	1.76123	5.47564	2.39524e-09	ATAC_KO_PBS_unique	81.9263	24.168	Intron (ENSMUST00000008542.11/13713, intron 2 of 4)	10	93254744	93284975	30232	2	13713	ENSMUST00000223340.1	16171	ENSMUSG00000008398	Elk3	ELK3, member of ETS oncogene family
chr2	7526746	7527190	445	*	145	2.42069	4.56206	2.42609e-09	ATAC_KO_PBS_unique	54.6597	10.2086	Distal Intergenic	2	7394076	7509563	115488	2	14007	ENSMUST00000182037.1	-17183	ENSMUSG00000002107	Celf2	CUGBP, Elav-like family member 2
chr2	107209370	107209650	281	*	97	2.42069	4.56206	2.42609e-09	ATAC_KO_PBS_unique	54.6597	10.2086	Distal Intergenic	2	107290639	107298502	7864	1	16492	ENSMUST00000037012.2	-80989	ENSMUSG00000042604	Kcna4	potassium voltage-gated channel, shaker-related subfamily, member 4
chr3	144932964	144933428	465	*	258	2.44147	4.5736	2.42609e-09	ATAC_KO_PBS_unique	55.4969	10.2167	Promoter	3	144910921	144932529	21609	2	99709	ENSMUST00000098549.3	-435	ENSMUSG00000074195	Clca4b	chloride channel accessory 4B
chr1	173742334	173742813	480	*	145	2.0044	5.1496	2.449e-09	ATAC_KO_PBS_unique	71.1011	17.7212	Promoter	1	173723683	173741747	18065	2	226691	ENSMUST00000127730.1	-587	ENSMUSG00000073490	Ifi207	interferon activated gene 207
chr19	33391558	33392403	846	*	173	1.30076	6.33089	2.48482e-09	merged_common	126.349	51.2866	Promoter	19	33137747	33392295	254549	2	67795	ENSMUST00000163093.1	0	ENSMUSG00000071573	Rnls	renalase, FAD-dependent amine oxidase
chr19	57609807	57611218	1412	*	1031	1.45885	6.01014	2.6325e-09	merged_common	106.859	38.8735	Promoter	19	57611034	58133338	522305	1	226255	ENSMUST00000077282.5	0	ENSMUSG00000054843	Atrnl1	attractin like 1
chr8	109395197	109395760	564	*	157	2.0342	5.05557	2.67311e-09	ATAC_KO_PBS_unique	67.3063	16.4324	Distal Intergenic	8	109340691	109340864	174	2	384864	ENSMUST00000211890.1	-54333	NA	Gm1943	WD repeat domain 70 pseudogene
chr16	23591508	23592053	546	*	337	2.10153	4.97418	2.74453e-09	ATAC_KO_PBS_unique	65.1162	15.1728	Intron (ENSMUST00000209422.1/67775, intron 2 of 3)	16	23601742	23613150	11409	1	67775	ENSMUST00000211569.1	-9689	ENSMUSG00000033355	Rtp4	receptor transporter protein 4
chr6	59213871	59214429	559	*	192	2.25984	4.79436	2.77023e-09	ATAC_KO_PBS_unique	60.7276	12.6796	Distal Intergenic	6	59208870	59212033	3164	1	68140	ENSMUST00000062626.3	5001	ENSMUSG00000049232	Tigd2	tigger transposable element derived 2
chr7	19683760	19684291	532	*	75	2.25984	4.79436	2.77023e-09	ATAC_KO_PBS_unique	60.7276	12.6796	Distal Intergenic	7	19678083	19681479	3397	2	11425	ENSMUST00000003071.9	-2281	ENSMUSG00000074336	Apoc4	apolipoprotein C-IV
chr1	71974780	71975075	296	*	130	2.17625	4.88739	2.77927e-09	ATAC_KO_PBS_unique	62.923	13.9217	Intron (ENSMUST00000188213.1/71134, intron 1 of 2)	1	71958998	72005195	46198	2	71134	ENSMUST00000188213.1	30120	ENSMUSG00000101848	4933417E11Rik	RIKEN cDNA 4933417E11 gene
chr2	167649026	167649741	716	*	455	1.39667	6.12367	3.03382e-09	merged_common	113.143	42.9723	Intron (ENSMUST00000125544.2/66589, intron 2 of 7)	2	167643736	167645177	1442	2	407243	ENSMUST00000142148.1	-3849	ENSMUSG00000090213	Tmem189	transmembrane protein 189
chr9	107981636	107984181	2546	*	1918	-0.94391	7.2238	3.17462e-09	merged_common	107.772	207.326	Promoter	9	107983025	107984053	1029	1	74153	ENSMUST00000177071.7	0	ENSMUSG00000032596	Uba7	ubiquitin-like modifier activating enzyme 7
chr18	54970651	54971546	896	*	352	1.28463	6.32193	3.53771e-09	merged_common	124.867	51.2548	Intron (ENSMUST00000064763.5/269023, intron 2 of 9)	18	54888045	54990180	102136	2	269023	ENSMUST00000064763.5	18634	ENSMUSG00000052713	Zfp608	zinc finger protein 608
chrX	102036855	102037544	690	*	229	1.59031	5.73837	3.7226e-09	merged_common	92.6375	30.7649	Intron (ENSMUST00000124279.5/100042480, intron 2 of 2)	20	102050851	102071966	21116	1	100042480	ENSMUST00000144397.1	-13307	ENSMUSG00000079481	Nhsl2	NHS-like 2
chr8	34903917	34904439	523	*	337	1.59031	5.73837	3.7226e-09	merged_common	92.6375	30.7649	Intron (ENSMUST00000033929.5/21951, intron 3 of 26)	8	34831571	34890151	58581	2	21951	ENSMUST00000209904.1	-13766	ENSMUSG00000031529	Tnks	tankyrase, TRF1-interacting ankyrin-related ADP-ribose polymerase
chr2	146516929	146517199	271	*	133	2.5432	4.44132	3.7604e-09	ATAC_KO_PBS_unique	52.4518	8.99872	Distal Intergenic	2	146243145	146512344	269200	2	241694	ENSMUST00000228797.1	-4585	ENSMUSG00000037110	Ralgapa2	Ral GTPase activating protein, alpha subunit 2 (catalytic)
chr3	54277248	54277507	260	*	76	2.5432	4.44132	3.7604e-09	ATAC_KO_PBS_unique	52.4518	8.99872	Intron (ENSMUST00000029311.10/22066, intron 4 of 10)	3	54361109	54391034	29926	1	50706	ENSMUST00000117373.7	-83602	ENSMUSG00000027750	Postn	periostin, osteoblast specific factor
chr7	130816069	130816650	582	*	240	2.5432	4.44132	3.7604e-09	ATAC_KO_PBS_unique	52.4518	8.99872	Intron (ENSMUST00000048453.6/330660, intron 11 of 15)	7	130774167	130824460	50294	1	330660	ENSMUST00000208593.1	41902	ENSMUSG00000040298	Btbd16	BTB (POZ) domain containing 16
chr15	10953299	10953794	496	*	299	2.521	4.42899	3.7604e-09	ATAC_KO_PBS_unique	51.6068	8.99105	Promoter	15	10952357	10979706	27350	1	81799	ENSMUST00000110523.1	942	ENSMUSG00000058914	C1qtnf3	C1q and tumor necrosis factor related protein 3
chr16	92612563	92612839	277	*	221	2.5432	4.44132	3.7604e-09	ATAC_KO_PBS_unique	52.4518	8.99872	Exon (ENSMUST00000180989.3/ENSMUST00000180989.3, exon 1 of 5)	16	92686758	92695495	8738	2	12394	ENSMUST00000187242.2	82656	ENSMUSG00000022952	Runx1	runt related transcription factor 1
chr1	23379609	23380829	1221	*	628	0.98643	7.05328	3.88998e-09	merged_common	186.948	94.3575	Promoter	1	23369724	23380801	11078	2	70155	ENSMUST00000186064.6	0	ENSMUSG00000026158	Ogfrl1	opioid growth factor receptor-like 1
chr11	86586237	86586628	392	*	312	1.68639	5.58684	4.07224e-09	ATAC_KO_PBS_unique	86.225	26.7904	Promoter	11	86585269	86586881	1613	2	75909	ENSMUST00000150176.1	253	ENSMUSG00000018171	Vmp1	vacuole membrane protein 1
chr3	9895572	9896962	1391	*	919	-1.14039	6.62515	4.07318e-09	merged_common	66.4849	146.56	Distal Intergenic	3	9687479	9833679	146201	2	94212	ENSMUST00000161949.7	-61893	ENSMUSG00000027508	Pag1	phosphoprotein associated with glycosphingolipid microdomains 1
chr2	144697930	144698422	493	*	287	2.39958	4.55033	4.10569e-09	ATAC_KO_PBS_unique	53.8218	10.2003	Intron (ENSMUST00000028917.6/66044, intron 4 of 5)	2	144678098	144747007	68910	1	66044	ENSMUST00000137406.1	19832	ENSMUSG00000027430	Dtd1	D-tyrosyl-tRNA deacylase 1
chr7	19933317	19933894	578	*	330	2.39958	4.55033	4.10569e-09	ATAC_KO_PBS_unique	53.8218	10.2003	Distal Intergenic	7	19938182	19944898	6717	2	70080	ENSMUST00000208210.1	11004	ENSMUSG00000040498	Igsf23	immunoglobulin superfamily, member 23
chr7	104369574	104370631	1058	*	389	1.08187	6.77699	4.12454e-09	merged_common	159.557	75.3771	Promoter	7	104355382	104369884	14503	2	244183	ENSMUST00000145982.1	0	ENSMUSG00000052749	Trim30b	tripartite motif-containing 30B
chr7	80192059	80192894	836	*	585	-1.17547	6.54737	4.23241e-09	merged_common	62.2342	140.566	Intron (ENSMUST00000032754.8/20352, intron 1 of 14)	7	80186878	80221832	34955	1	20352	ENSMUST00000107383.7	5181	ENSMUSG00000030539	Sema4b	sema domain, immunoglobulin domain (Ig), transmembrane domain (TM) and short cytoplasmic domain, (semaphorin) 4B
chr8	121898168	121898958	791	*	512	1.52392	5.82485	4.24418e-09	merged_common	96.123	33.4258	Intron (ENSMUST00000127664.1/108148, intron 1 of 15)	8	121888374	121896502	8129	2	20539	ENSMUST00000183015.1	-1666	ENSMUSG00000040010	Slc7a5	solute carrier family 7 (cationic amino acid transporter, y+ system), member 5
chr10	12919113	12919650	538	*	323	1.25501	6.38368	4.30116e-09	merged_common	128.996	54.0482	Intron (ENSMUST00000181073.8/320273, intron 2 of 2)	10	12916648	12923090	6443	2	320273	ENSMUST00000181073.8	3440	ENSMUSG00000097378	B230208H11Rik	RIKEN cDNA B230208H11 gene
chr10	40077454	40077561	108	*	48	2.01766	5.04638	4.31562e-09	ATAC_KO_PBS_unique	66.4967	16.4219	Promoter	10	40037299	40076605	39307	2	72472	ENSMUST00000213827.1	-849	ENSMUSG00000019838	Slc16a10	solute carrier family 16 (monocarboxylic acid transporters), member 10
chr18	61130507	61133425	2919	*	1626	-0.90797	7.2854	4.33374e-09	merged_common	113.884	213.691	3' UTR	18	61117468	61117531	64	1	102466212	ENSMUST00000183458.1	13039	ENSMUSG00000098389	Mir6983	microRNA 6983
chr2	122770992	122771332	341	*	121	2.29472	4.66096	4.35396e-09	ATAC_KO_PBS_unique	56.0375	11.4209	Promoter	2	122771718	122800762	29045	1	59010	ENSMUST00000176999.7	-386	ENSMUSG00000005803	Sqor	sulfide quinone oxidoreductase
chr3	61406795	61407470	676	*	354	1.8332	5.34674	4.51151e-09	ATAC_KO_PBS_unique	76.8163	21.5578	Distal Intergenic	3	61361638	61368430	6793	1	74012	ENSMUST00000049064.3	45157	ENSMUSG00000036894	Rap2b	RAP2B, member of RAS oncogene family
chr5	99203073	99203821	749	*	572	1.8332	5.34674	4.51151e-09	ATAC_KO_PBS_unique	76.8163	21.5578	Distal Intergenic	5	99227794	99234066	6273	2	320292	ENSMUST00000166632.1	30245	ENSMUSG00000089809	Rasgef1b	RasGEF domain family, member 1B
chr10	25119149	25119562	414	*	190	1.8332	5.34674	4.51151e-09	ATAC_KO_PBS_unique	76.8163	21.5578	Distal Intergenic	10	25169090	25200158	31069	2	432442	ENSMUST00000100012.2	80596	ENSMUSG00000039166	Akap7	A kinase (PRKA) anchor protein 7
chr1	72428618	72428902	285	*	214	2.15834	4.87744	4.5479e-09	ATAC_KO_PBS_unique	62.1038	13.9121	3' UTR	1	72427112	72536930	109819	2	381270	ENSMUST00000047786.5	108028	ENSMUSG00000039372	March4	membrane-associated ring finger (C3HC4) 4
chr1	128615485	128615735	251	*	89	2.15834	4.87744	4.5479e-09	ATAC_KO_PBS_unique	62.1038	13.9121	Distal Intergenic	1	128589099	128592293	3195	2	12767	ENSMUST00000142893.1	-23192	ENSMUSG00000045382	Cxcr4	chemokine (C-X-C motif) receptor 4
chr10	24890702	24891010	309	*	243	4.06504	3.06464	4.58385e-09	ATAC_KO_PBS_unique	34.2293	2.04503	Promoter	10	24890967	24892585	1619	1	70208	ENSMUST00000175786.1	0	ENSMUSG00000019984	Med23	mediator complex subunit 23
chr14	47863179	47863421	243	*	150	4.06504	3.06464	4.58385e-09	ATAC_KO_PBS_unique	34.2293	2.04503	Distal Intergenic	14	47898851	47915716	16866	1	73961	ENSMUST00000226143.1	-35430	ENSMUSG00000115609	4930447J18Rik	RIKEN cDNA 4930447J18 gene
chr18	66467463	66468400	938	*	552	1.04906	6.89354	4.63536e-09	merged_common	171.026	82.6538	Distal Intergenic	18	66458604	66465550	6947	1	58801	ENSMUST00000025399.7	8859	ENSMUSG00000024521	Pmaip1	phorbol-12-myristate-13-acetate-induced protein 1
chr8	33652969	33653853	885	*	517	1.32454	6.21914	4.7863e-09	merged_common	117.899	47.0744	Promoter	8	33653238	33698163	44926	1	14782	ENSMUST00000033992.8	0	ENSMUSG00000031584	Gsr	glutathione reductase
chr7	19817229	19818058	830	*	468	1.40847	6.03304	4.83721e-09	ATAC_KO_PBS_unique	106.69	40.1911	Intron (ENSMUST00000137373.1/ENSMUST00000137373.1, intron 1 of 1)	7	19811495	19815996	4502	2	12051	ENSMUST00000141996.1	-1233	ENSMUSG00000053175	Bcl3	B cell leukemia/lymphoma 3
chr7	104464711	104465844	1134	*	583	1.04607	6.86582	4.88077e-09	merged_common	167.597	81.165	Promoter	7	104409025	104465193	56169	2	20128	ENSMUST00000076922.5	0	ENSMUSG00000030921	Trim30a	tripartite motif-containing 30A
chr6	89421410	89422301	892	*	661	1.18382	6.55817	4.94633e-09	merged_common	142.033	62.5206	Intron (ENSMUST00000113550.5/66098, intron 4 of 6)	6	89316314	89362620	46307	2	18844	ENSMUST00000163139.7	-58790	ENSMUSG00000030084	Plxna1	plexin A1
chrY	90798560	90800977	2418	*	2030	-1.29076	6.31114	5.02516e-09	merged_common	50.7649	124.2	Intron (ENSMUST00000179483.7/170942, intron 3 of 3)	21	90785586	90816464	30879	1	170942	ENSMUST00000179077.1	12974	ENSMUSG00000096768	Erdr1	erythroid differentiation regulator 1
chr8	14992641	14993379	739	*	262	1.22729	6.44285	5.11714e-09	merged_common	133.112	56.8546	Intron (ENSMUST00000084207.11/234094, intron 27 of 28)	8	14990359	14991124	766	1	234094	ENSMUST00000162444.1	2282	ENSMUSG00000071176	Arhgef10	Rho guanine nucleotide exchange factor (GEF) 10
chr1	176825818	176826505	688	*	516	1.6838	5.51084	5.12581e-09	ATAC_KO_PBS_unique	81.727	25.4385	Exon (ENSMUST00000150429.7/76816, exon 3 of 8)	1	176814660	177020437	205778	1	76816	ENSMUST00000123409.7	11158	ENSMUSG00000026504	Sdccag8	serologically defined colon cancer antigen 8
chr6	15720516	15721403	888	*	577	1.6838	5.51084	5.12581e-09	ATAC_KO_PBS_unique	81.727	25.4385	Promoter	6	15720661	15802165	81505	1	16543	ENSMUST00000101663.9	0	ENSMUSG00000041390	Mdfic	MyoD family inhibitor domain containing
chr6	57702793	57703575	783	*	550	1.4072	6.08167	5.1467e-09	merged_common	110.299	41.5873	Promoter	6	57703087	57739438	36352	1	71835	ENSMUST00000153777.1	0	ENSMUSG00000062190	Lancl2	LanC (bacterial lantibiotic synthetase component C)-like 2
chr8	77483634	77484136	503	*	209	1.4072	6.08167	5.1467e-09	merged_common	110.299	41.5873	Intron (ENSMUST00000076316.5/78514, intron 1 of 22)	8	77517056	77518579	1524	1	70345	ENSMUST00000184762.1	-32920	ENSMUSG00000097882	0610038B21Rik	RIKEN cDNA 0610038B21 gene
chr6	128648453	128648998	546	*	261	-1.84844	5.25785	5.37013e-09	merged_common	20.1629	72.6087	Exon (ENSMUST00000203669.1/ENSMUST00000203669.1, exon 1 of 1)	6	128662385	128677374	14990	1	94071	ENSMUST00000032518.6	-13387	ENSMUSG00000030364	Clec2h	C-type lectin domain family 2, member h
chr6	97449639	97450146	508	*	413	1.85135	5.2652	5.37013e-09	ATAC_KO_PBS_unique	73.0532	20.2454	Exon (ENSMUST00000204326.1/ENSMUST00000204326.1, exon 1 of 2)	6	97287088	97459286	172199	2	232288	ENSMUST00000113359.7	9140	ENSMUSG00000030064	Frmd4b	FERM domain containing 4B
chr17	73067064	73067843	780	*	498	1.62815	5.62574	5.47897e-09	ATAC_KO_PBS_unique	86.8115	28.0838	Distal Intergenic	17	73107985	73161991	54007	1	225010	ENSMUST00000130574.3	-40142	ENSMUSG00000054469	Lclat1	lysocardiolipin acyltransferase 1
chr1	123934002	123934779	778	*	539	1.42945	5.99381	5.64152e-09	merged_common	104.585	38.8296	Intron (ENSMUST00000112606.7/269109, intron 1 of 25)	1	123332142	124045163	713022	2	269109	ENSMUST00000112603.3	110384	ENSMUSG00000036815	Dpp10	dipeptidylpeptidase 10
chr7	121516732	121518046	1315	*	905	-0.88722	7.31735	5.71289e-09	merged_common	117.274	216.911	Intron (ENSMUST00000205739.1/75793, intron 2 of 5)	7	121468844	121589834	120991	2	75793	ENSMUST00000205739.1	71788	NA	4933432K03Rik	RIKEN cDNA 4933432K03 gene
chr6	22347377	22348006	630	*	306	1.72127	5.45345	5.71759e-09	ATAC_KO_PBS_unique	79.5663	24.131	Intron (ENSMUST00000165576.7/27999, intron 1 of 9)	6	22322290	22343913	21624	2	27999	ENSMUST00000168965.2	-3464	ENSMUSG00000029672	Fam3c	family with sequence similarity 3, member C
chr7	113721876	113722353	478	*	290	1.73473	5.46092	5.71759e-09	merged_common	80.3533	24.1434	Distal Intergenic	7	113765998	114043370	277373	1	233744	ENSMUST00000046687.15	-43645	ENSMUSG00000038156	Spon1	spondin 1, (f-spondin) extracellular matrix protein
chr13	90088827	90090187	1361	*	849	0.71144	7.95327	5.84602e-09	merged_common	317.143	193.683	Promoter	13	89774027	90089523	315497	2	108138	ENSMUST00000159199.7	0	ENSMUSG00000021615	Xrcc4	X-ray repair complementing defective repair in Chinese hamster cells 4
chr11	103344251	103345596	1346	*	891	-1.09538	6.7338	5.85403e-09	merged_common	72.8123	155.578	Promoter	11	103331500	103344702	13203	2	544817	ENSMUST00000041385.13	0	ENSMUSG00000034255	Arhgap27	Rho GTPase activating protein 27
chr5	139014924	139015535	612	*	201	1.29193	6.2854	5.93613e-09	merged_common	122.053	49.847	Downstream (1-2kb)	5	139018666	139023810	5145	2	19085	ENSMUST00000139415.1	8275	ENSMUSG00000025855	Prkar1b	protein kinase, cAMP dependent regulatory, type I beta
chr7	140998713	140999700	988	*	768	1.20664	6.4674	6.03627e-09	merged_common	134.431	58.2457	Distal Intergenic	7	141009586	141010770	1185	2	66141	ENSMUST00000026565.6	11070	ENSMUSG00000025492	Ifitm3	interferon induced transmembrane protein 3
chrX	96239615	96240164	550	*	142	1.46397	5.90609	6.0495e-09	merged_common	99.6001	36.1045	Promoter	20	96239926	96243636	3711	1	100038363	ENSMUST00000133125.2	0	ENSMUSG00000078122	F630028O10Rik	RIKEN cDNA F630028O10 gene
chr7	58676944	58677697	754	*	445	1.66141	5.57297	6.19845e-09	ATAC_KO_PBS_unique	84.6639	26.7648	Intron (ENSMUST00000168747.2/11982, intron 1 of 20)	7	58658246	58829420	171175	1	11982	ENSMUST00000168747.2	18698	ENSMUSG00000025324	Atp10a	ATPase, class V, type 10A
chr13	113591256	113592090	835	*	282	1.97311	5.13222	6.21631e-09	ATAC_KO_PBS_unique	69.492	17.6999	Downstream (<1kb)	13	113592185	113613641	21457	2	170625	ENSMUST00000223993.1	21551	ENSMUSG00000042364	Snx18	sorting nexin 18
chr3	27209426	27210206	781	*	556	1.51297	5.81877	6.31692e-09	ATAC_KO_PBS_unique	95.3562	33.4118	Intron (ENSMUST00000046515.14/320024, intron 1 of 4)	3	27188441	27239584	51144	1	320024	ENSMUST00000140872.1	20985	ENSMUSG00000027698	Nceh1	neutral cholesterol ester hydrolase 1
chr13	13525312	13526555	1244	*	787	1.51297	5.81877	6.31692e-09	ATAC_KO_PBS_unique	95.3562	33.4118	Distal Intergenic	13	13508712	13510348	1637	1	18073	ENSMUST00000222436.1	16600	ENSMUSG00000005397	Nid1	nidogen 1
chr2	159592775	159593177	403	*	229	2.49842	4.41645	6.41117e-09	ATAC_KO_PBS_unique	50.7614	8.98327	Distal Intergenic	2	159947341	159981288	33948	1	71081	ENSMUST00000133091.1	-354164	ENSMUSG00000085198	4933416E03Rik	RIKEN cDNA 4933416E03 gene
chr9	61054408	61055081	674	*	274	-1.01459	6.93393	6.64032e-09	merged_common	86.0221	173.793	Intron (ENSMUST00000216170.1/ENSMUST00000216170.1, intron 3 of 6)	9	61017069	61019797	2729	1	330956	ENSMUST00000216854.1	37339	ENSMUSG00000111290	Gm5122	predicted gene 5122
chrY	90737408	90740689	3282	*	2733	-0.87163	7.36608	6.84634e-09	merged_common	121.96	223.154	Distal Intergenic	21	90784738	90816439	31702	1	170942	ENSMUST00000179483.7	-44049	ENSMUSG00000096768	Erdr1	erythroid differentiation regulator 1
chr4	117218555	117219170	616	*	443	1.98393	5.02764	6.9471e-09	ATAC_KO_PBS_unique	64.8756	16.4006	Intron (ENSMUST00000165128.8/381544, intron 7 of 12)	4	117213334	117213782	449	2	381544	ENSMUST00000141554.1	-4773	ENSMUSG00000060268	Armh1	armadillo-like helical domain containing 1
chr12	35711453	35712086	634	*	190	1.98393	5.02764	6.9471e-09	ATAC_KO_PBS_unique	64.8756	16.4006	Distal Intergenic	12	35672380	35695118	22739	2	71581	ENSMUST00000222153.1	-16335	ENSMUSG00000113985	9130015A21Rik	RIKEN cDNA 9130015A21 gene
chr15	26360348	26360720	373	*	210	1.81901	5.33886	7.0179e-09	ATAC_KO_PBS_unique	76.023	21.5461	Intron (ENSMUST00000140840.7/211147, intron 2 of 3)	15	26387719	26409576	21858	1	211147	ENSMUST00000155819.1	-26999	ENSMUSG00000022269	March11	membrane-associated ring finger (C3HC4) 11
chr8	126591259	126596929	5671	*	3417	-0.65256	8.16387	7.02566e-09	merged_common	228.744	359.575	Promoter	8	126588296	126593986	5691	2	270110	ENSMUST00000054960.7	0	ENSMUSG00000051495	Irf2bp2	interferon regulatory factor 2 binding protein 2
chr12	108765655	108766780	1126	*	343	1.39874	6.02764	7.04193e-09	merged_common	105.933	40.1762	Distal Intergenic	12	108792973	108820148	27176	1	22632	ENSMUST00000021692.8	-26193	ENSMUSG00000021264	Yy1	YY1 transcription factor
chr4	16088206	16089207	1002	*	571	0.95709	7.08214	7.14456e-09	merged_common	188.796	97.2479	Distal Intergenic	4	15997121	16013888	16768	2	209212	ENSMUST00000037198.9	-74318	ENSMUSG00000041153	Osgin2	oxidative stress induced growth inhibitor family member 2
chr16	87261467	87262499	1033	*	294	1.26158	6.3487	7.18173e-09	merged_common	126.193	52.6335	Distal Intergenic	16	87354185	87368742	14558	1	67768	ENSMUST00000054442.10	-91686	ENSMUSG00000044442	N6amt1	N-6 adenine-specific DNA methyltransferase 1 (putative)
chr15	10868945	10869606	662	*	352	1.53942	5.77296	7.27071e-09	ATAC_KO_PBS_unique	93.2266	32.0722	Distal Intergenic	15	10814827	10835214	20388	1	100502601	ENSMUST00000228418.1	54118	NA	Gm19276	predicted gene, 19276
chr9	86104743	86105114	372	*	164	2.27427	4.6496	7.27827e-09	ATAC_KO_PBS_unique	55.2053	11.4119	Distal Intergenic	9	85843361	85843925	565	1	21983	ENSMUST00000185559.1	261382	ENSMUSG00000035274	Tpbg	trophoblast glycoprotein
chr2	79131910	79132755	846	*	495	1.58489	5.66993	7.28454e-09	merged_common	88.1797	29.3947	Distal Intergenic	2	79255426	79257852	2427	1	16401	ENSMUST00000155105.1	-122671	ENSMUSG00000027009	Itga4	integrin alpha 4
chr1	131525671	131528330	2660	*	1847	-0.49392	8.9425	7.39969e-09	merged_common	414.59	583.852	Promoter	1	131527903	131539872	11970	1	108900	ENSMUST00000068613.4	0	ENSMUSG00000055184	Fam72a	family with sequence similarity 72, member A
chr7	64011348	64012613	1266	*	659	0.84984	7.43279	7.40022e-09	merged_common	231.956	128.7	Exon (ENSMUST00000206557.1/ENSMUST00000206557.1, exon 2 of 4)	7	63886351	63938915	52565	2	50794	ENSMUST00000063694.9	-72433	ENSMUSG00000052040	Klf13	Kruppel-like factor 13
chr17	43137466	43138861	1396	*	567	0.87013	7.3736	7.45849e-09	merged_common	224.203	122.661	Distal Intergenic	17	43149357	43158196	8840	2	545207	ENSMUST00000233120.1	19335	ENSMUSG00000117011	E130008D07Rik	RIKEN cDNA E130008D07 gene
chr10	125271327	125271939	613	*	431	1.43095	5.94209	7.65131e-09	ATAC_KO_PBS_unique	100.955	37.4428	Intron (ENSMUST00000211781.1/20503, intron 3 of 5)	10	125227487	125308816	81330	2	20503	ENSMUST00000105257.3	36877	ENSMUSG00000020102	Slc16a7	solute carrier family 16 (monocarboxylic acid transporters), member 7
chr13	113600701	113601602	902	*	603	1.34156	6.13952	7.79139e-09	merged_common	112.229	44.2848	Intron (ENSMUST00000109241.4/170625, intron 1 of 1)	13	113592185	113613641	21457	2	170625	ENSMUST00000223993.1	12039	ENSMUSG00000042364	Snx18	sorting nexin 18
chr11	101972545	101973045	501	*	133	1.67062	5.50351	7.85639e-09	ATAC_KO_PBS_unique	80.9422	25.4254	3' UTR	11	101962458	101967015	4558	2	74499	ENSMUST00000001534.6	-5530	ENSMUSG00000001494	Sost	sclerostin
chr13	63253057	63253688	632	*	319	1.67062	5.50351	7.85639e-09	ATAC_KO_PBS_unique	80.9422	25.4254	Exon (ENSMUST00000221520.1/ENSMUST00000221520.1, exon 1 of 1)	13	63240108	63301232	61125	1	72061	ENSMUST00000220884.1	12949	ENSMUSG00000021458	Aopep	aminopeptidase O
chr11	30025504	30026659	1156	*	644	0.77888	7.64783	8.22266e-09	merged_common	262.7	153.106	Promoter	11	29743048	30026033	282986	2	237711	ENSMUST00000058902.5	0	ENSMUSG00000044072	Eml6	echinoderm microtubule associated protein like 6
chr10	56792768	56793684	917	*	436	1.28222	6.23837	8.27631e-09	merged_common	117.742	48.4109	Distal Intergenic	10	56431981	56475967	43987	1	102640560	ENSMUST00000218830.1	360787	NA	Gm36595	predicted gene, 36595
chr3	18319322	18319873	552	*	256	1.83633	5.25686	8.43053e-09	ATAC_KO_PBS_unique	72.255	20.2338	Distal Intergenic	3	18071950	18243338	171389	2	13123	ENSMUST00000035625.6	-75984	ENSMUSG00000039519	Cyp7b1	cytochrome P450, family 7, subfamily b, polypeptide 1
chr7	75371645	75371765	121	*	65	-1.22208	6.41407	8.50166e-09	merged_common	55.8324	130.247	Distal Intergenic	7	75114894	75309262	194369	2	64176	ENSMUST00000165175.7	-62383	ENSMUSG00000053025	Sv2b	synaptic vesicle glycoprotein 2 b
chr13	24616695	24617027	333	*	98	2.81051	4.12869	8.55666e-09	ATAC_KO_PBS_unique	46.3323	6.60443	Intron (ENSMUST00000110383.7/193385, intron 1 of 22)	13	24614627	24705897	91271	1	193385	ENSMUST00000132689.7	2068	ENSMUSG00000036006	Ripor2	RHO family interacting cell polarization regulator 2
chrX	100518569	100518968	400	*	241	2.81051	4.12869	8.55666e-09	ATAC_KO_PBS_unique	46.3323	6.60443	Distal Intergenic	20	100524838	100545891	21054	1	668257	ENSMUST00000140551.1	-5870	ENSMUSG00000067597	Dgat2l6	diacylglycerol O-acyltransferase 2-like 6
chr15	47901404	47901842	439	*	86	1.70767	5.44589	8.79629e-09	ATAC_KO_PBS_unique	78.7782	24.1183	Intron (ENSMUST00000160658.7/239420, intron 22 of 68)	15	47947897	47961468	13572	2	239420	ENSMUST00000110261.1	59626	ENSMUSG00000022311	Csmd3	CUB and Sushi multiple domains 3
chr16	36720020	36720118	99	*	54	1.70767	5.44589	8.79629e-09	ATAC_KO_PBS_unique	78.7782	24.1183	Intron (ENSMUST00000023617.12/106347, intron 5 of 7)	16	36715538	36722260	6723	1	106347	ENSMUST00000128084.1	4482	ENSMUSG00000022900	Ildr1	immunoglobulin-like domain containing receptor 1
chr2	172430499	172431088	590	*	265	-1.63048	5.57646	9.40837e-09	merged_common	27.1188	83.9641	Intron (ENSMUST00000103073.8/320664, intron 5 of 5)	2	172440556	172469908	29353	1	66404	ENSMUST00000029005.3	-9468	ENSMUSG00000027502	Rtf2	replication termination factor 2
chr12	100067235	100067973	739	*	361	1.7474	5.38574	9.80762e-09	ATAC_KO_PBS_unique	76.6089	22.817	Distal Intergenic	12	100110154	100115866	5713	1	19179	ENSMUST00000222374.1	-42181	ENSMUSG00000021178	Psmc1	protease (prosome, macropain) 26S subunit, ATPase 1
chr18	64618458	64619264	807	*	523	1.20982	6.39629	1.00882e-08	merged_common	128.107	55.3833	Intron (ENSMUST00000025482.8/54670, intron 1 of 27)	18	64528979	64661000	132022	2	54670	ENSMUST00000025482.8	41736	ENSMUSG00000039529	Atp8b1	ATPase, class I, type 8B, member 1
chr7	19830502	19831593	1092	*	460	0.91388	7.18643	1.01467e-08	merged_common	199.933	106.115	Distal Intergenic	7	19808462	19822770	14309	2	12051	ENSMUST00000120537.7	-7732	ENSMUSG00000053175	Bcl3	B cell leukemia/lymphoma 3
chr3	28781029	28781594	566	*	200	1.38894	6.0222	1.02253e-08	merged_common	105.177	40.1612	Promoter	3	28781276	28798846	17571	1	208691	ENSMUST00000060500.8	0	ENSMUSG00000050192	Eif5a2	eukaryotic translation initiation factor 5A2
chr1	136685234	136686024	791	*	312	1.47708	5.85712	1.03318e-08	ATAC_KO_PBS_unique	96.7145	34.7413	Intron (ENSMUST00000180495.7/100503460, intron 4 of 4)	1	136683629	136690802	7174	1	100503460	ENSMUST00000180962.1	1605	ENSMUSG00000097113	Gm19705	predicted gene, 19705
chr5	109556778	109557806	1029	*	535	1.37887	6.06593	1.07544e-08	ATAC_KO_PBS_unique	108.036	41.5419	Promoter	5	109554715	109556473	1759	2	57914	ENSMUST00000198960.1	-305	ENSMUSG00000033467	Crlf2	cytokine receptor-like factor 2
chr17	15801265	15801738	474	*	235	1.51663	5.76031	1.08188e-08	ATAC_KO_PBS_unique	91.6857	32.0443	Downstream (1-2kb)	17	15820982	15824395	3414	2	68799	ENSMUST00000232592.1	22657	ENSMUSG00000048027	Rgmb	repulsive guidance molecule family member B
chr4	102658477	102658889	413	*	259	2.47544	4.40368	1.0899e-08	ATAC_KO_PBS_unique	49.9149	8.9753	Distal Intergenic	4	102589843	102603441	13599	1	18578	ENSMUST00000106901.1	68634	ENSMUSG00000028525	Pde4b	phosphodiesterase 4B, cAMP specific
chr13	59562547	59562917	371	*	133	2.47544	4.40368	1.0899e-08	ATAC_KO_PBS_unique	49.9149	8.9753	Intron (ENSMUST00000170520.7/67269, intron 1 of 4)	13	59531905	59558894	26990	2	67269	ENSMUST00000168821.7	-3653	ENSMUSG00000021557	Agtpbp1	ATP/GTP binding protein 1
chr18	84785180	84785689	510	*	214	1.56062	5.65644	1.09579e-08	merged_common	86.6273	29.3671	Distal Intergenic	18	84720883	84730224	9342	1	240479	ENSMUST00000161033.1	64297	ENSMUSG00000047992	Dipk1c	divergent protein kinase domain 1C
chr2	116922710	116923168	459	*	228	1.96673	5.01809	1.11497e-08	ATAC_KO_PBS_unique	64.0646	16.3898	Distal Intergenic	2	116900194	116904557	4364	1	320975	ENSMUST00000155323.1	22516	ENSMUSG00000085316	D330050G23Rik	RIKEN cDNA D330050G23 gene
chr18	39445958	39446356	399	*	174	1.96673	5.01809	1.11497e-08	ATAC_KO_PBS_unique	64.0646	16.3898	Intron (ENSMUST00000115567.7/14815, intron 2 of 8)	18	39414482	39487232	72751	2	14815	ENSMUST00000097592.8	40876	ENSMUSG00000024431	Nr3c1	nuclear receptor subfamily 3, group C, member 1
chr13	93354904	93355475	572	*	87	1.32314	6.12928	1.11876e-08	merged_common	110.726	44.2532	Intron (ENSMUST00000109494.7/26556, intron 4 of 5)	13	93308034	93405129	97096	1	26556	ENSMUST00000079086.7	46870	ENSMUSG00000007617	Homer1	homer scaffolding protein 1
chr19	9931091	9932010	920	*	189	1.32314	6.12928	1.11876e-08	merged_common	110.726	44.2532	Distal Intergenic	19	9872297	9899533	27237	2	16319	ENSMUST00000025562.7	-31558	ENSMUSG00000024660	Incenp	inner centromere protein
chr11	103115004	103116819	1816	*	1193	-0.6646	8.04984	1.12874e-08	merged_common	210.48	333.638	Promoter	11	103116231	103119725	3495	1	192231	ENSMUST00000053063.6	0	ENSMUSG00000048878	Hexim1	hexamethylene bis-acetamide inducible 1
chr9	61168827	61169664	838	*	434	-0.87119	7.32625	1.14486e-08	merged_common	118.657	217.044	Distal Intergenic	9	61138515	61145259	6745	1	619328	ENSMUST00000216012.1	30312	ENSMUSG00000110998	I730028E13Rik	RIKEN cDNA I730028E13 gene
chr1	138191758	138192584	827	*	362	1.31501	6.16993	1.15243e-08	merged_common	113.57	45.6463	Exon (ENSMUST00000187489.2/ENSMUST00000187489.2, exon 1 of 2)	1	138126209	138175708	49500	2	19264	ENSMUST00000183229.2	-16050	ENSMUSG00000026395	Ptprc	protein tyrosine phosphatase, receptor type, C
chr2	52997716	52998328	613	*	436	2.03132	4.93518	1.16729e-08	ATAC_KO_PBS_unique	61.8559	15.1319	Intron (ENSMUST00000155586.8/71409, intron 1 of 26)	2	52857868	53131878	274011	1	71409	ENSMUST00000050719.12	139848	ENSMUSG00000036053	Fmnl2	formin-like 2
chr13	5845206	5845918	713	*	590	2.03132	4.93518	1.16729e-08	ATAC_KO_PBS_unique	61.8559	15.1319	Distal Intergenic	13	5855515	5857561	2047	2	71867	ENSMUST00000223142.1	11643	ENSMUSG00000100625	1700016G22Rik	RIKEN cDNA 1700016G22 gene
chr16	97110081	97110724	644	*	193	2.03132	4.93518	1.16729e-08	ATAC_KO_PBS_unique	61.8559	15.1319	Intron (ENSMUST00000056102.8/13508, intron 1 of 32)	16	96590840	97170752	579913	2	13508	ENSMUST00000056102.8	60028	ENSMUSG00000050272	Dscam	DS cell adhesion molecule
chr3	95855551	95856356	806	*	341	1.40947	5.98271	1.19669e-08	merged_common	103.067	38.7997	Promoter	3	95830124	95855885	25762	2	70767	ENSMUST00000015892.13	0	ENSMUSG00000015748	Prpf3	pre-mRNA processing factor 3
chr9	110633803	110634419	617	*	290	-1.23496	6.32553	1.19831e-08	merged_common	52.275	123.042	Promoter	9	110629570	110634449	4880	2	235627	ENSMUST00000123996.1	30	ENSMUSG00000056724	Nbeal2	neurobeachin-like 2
chr3	84715048	84715514	467	*	147	1.76064	5.30643	1.20189e-08	ATAC_KO_PBS_unique	72.8446	21.4977	Intron (ENSMUST00000154148.7/99889, intron 3 of 9)	3	84690223	84692544	2322	1	320782	ENSMUST00000128344.1	24825	ENSMUSG00000056498	Tmem154	transmembrane protein 154
chrX	50972236	50972660	425	*	154	2.23238	4.62633	1.21304e-08	ATAC_KO_PBS_unique	53.5391	11.3935	Distal Intergenic	20	50895180	50942710	47531	2	385354	ENSMUST00000164311.6	-29526	ENSMUSG00000036131	Frmd7	FERM domain containing 7
chr9	58274976	58276048	1073	*	332	1.54393	5.71261	1.24613e-08	merged_common	89.5471	30.7102	Distal Intergenic	9	58260227	58261885	1659	1	69106	ENSMUST00000216864.1	14749	ENSMUSG00000032333	Stoml1	stomatin-like 1
chr6	108836206	108836696	491	*	120	1.60342	5.612	1.25076e-08	ATAC_KO_PBS_unique	85.2549	28.057	Promoter	6	108836410	108843058	6649	1	192193	ENSMUST00000203469.1	0	ENSMUSG00000030104	Edem1	ER degradation enhancer, mannosidase alpha-like 1
chr4	70545944	70546654	711	*	150	1.34991	6.04984	1.26239e-08	merged_common	105.771	41.4956	Distal Intergenic	4	70461826	70534995	73170	2	230316	ENSMUST00000037881.2	-10949	ENSMUSG00000039270	Megf9	multiple EGF-like-domains 9
chr2	151966972	151967526	555	*	370	-1.35217	6.04638	1.26239e-08	merged_common	41.3638	105.6	Promoter	2	151967529	151967617	89	2	100316704	ENSMUST00000157866.1	91	ENSMUSG00000088491	Mir1953	microRNA 1953
chr19	11464919	11465121	203	*	129	3.13848	3.66096	1.2725e-08	ATAC_KO_PBS_unique	37.5359	4.26256	Distal Intergenic	19	11462489	11463288	800	1	60361	ENSMUST00000123758.1	2430	ENSMUSG00000056290	Ms4a4b	membrane-spanning 4-domains, subfamily A, member 4B
chr11	75208756	75210116	1361	*	843	-0.96484	7.01014	1.29487e-08	merged_common	92.2655	180.088	Intron (ENSMUST00000102514.3/237847, intron 1 of 1)	11	75193783	75267769	73987	1	237847	ENSMUST00000102514.3	14973	ENSMUSG00000045287	Rtn4rl1	reticulon 4 receptor-like 1
chr3	59312319	59313143	825	*	520	1.34101	6.09275	1.3166e-08	merged_common	108.628	42.8804	3' UTR	3	59317925	59344159	26235	2	242050	ENSMUST00000193455.5	31016	ENSMUSG00000036334	Igsf10	immunoglobulin superfamily, member 10
chr5	112908141	112908646	506	*	303	-1.82221	5.24593	1.31956e-08	ATAC_Control_PBS_unique	20.1796	71.3596	Downstream (1-2kb)	5	112688876	112896362	207487	2	74376	ENSMUST00000086617.10	-11779	ENSMUSG00000072720	Myo18b	myosin XVIIIb
chr5	34105581	34106036	456	*	306	1.82115	5.24843	1.31956e-08	ATAC_KO_PBS_unique	71.4571	20.222	Promoter	5	34014346	34105803	91458	2	272158	ENSMUST00000202741.4	0	ENSMUSG00000045102	Poln	DNA polymerase N
chr12	34432562	34433700	1139	*	551	1.05427	6.78954	1.33068e-08	merged_common	159.418	76.7665	Exon (ENSMUST00000209902.1/79221, exon 3 of 25)	12	34373827	34437307	63481	2	79221	ENSMUST00000211107.1	3607	ENSMUSG00000004698	Hdac9	histone deacetylase 9
chr5	113944901	113945851	951	*	454	1.10158	6.67132	1.35033e-08	merged_common	149.304	69.5766	Intron (ENSMUST00000159592.7/231637, intron 14 of 14)	5	113965602	113966756	1155	2	231637	ENSMUST00000162396.1	20905	ENSMUSG00000042121	Ssh1	slingshot protein phosphatase 1
chr3	27182704	27183409	706	*	178	1.09494	6.66763	1.35033e-08	merged_common	148.58	69.5588	Promoter	3	27182965	27244958	61994	1	320024	ENSMUST00000046515.14	0	ENSMUSG00000027698	Nceh1	neutral cholesterol ester hydrolase 1
chr16	50759898	50760540	643	*	302	1.19674	6.42587	1.39457e-08	merged_common	130.169	56.7874	Distal Intergenic	16	50783409	50784091	683	1	78639	ENSMUST00000173461.2	-22869	ENSMUSG00000092276	1700116B05Rik	RIKEN cDNA 1700116B05 gene
chr10	94575814	94576619	806	*	316	1.05073	6.7597	1.40101e-08	merged_common	155.964	75.2873	Promoter	10	94576263	94588801	12539	1	319880	ENSMUST00000117929.1	0	ENSMUSG00000020023	Tmcc3	transmembrane and coiled coil domains 3
chr5	86190378	86190759	382	*	135	1.87069	5.17878	1.43957e-08	ATAC_KO_PBS_unique	69.2684	18.9409	Intron (ENSMUST00000113372.1/14715, intron 1 of 1)	5	86184556	86197846	13291	2	14715	ENSMUST00000094654.2	7087	ENSMUSG00000029255	Gnrhr	gonadotropin releasing hormone receptor
chr7	126144421	126144665	245	*	82	2.7848	4.11441	1.48531e-08	ATAC_KO_PBS_unique	45.469	6.59791	Intron (ENSMUST00000168189.7/74204, intron 8 of 23)	7	126112899	126140662	27764	2	74204	ENSMUST00000166538.1	-3759	ENSMUSG00000000131	Xpo6	exportin 6
chr16	4512703	4513120	418	*	212	-1.74669	5.36608	1.51037e-08	ATAC_Control_PBS_unique	22.5138	75.5534	Intron (ENSMUST00000090500.9/106393, intron 1 of 5)	16	4493603	4523063	29461	2	106393	ENSMUST00000132284.1	9943	ENSMUSG00000022519	Srl	sarcalumenin
chr2	60910766	60911166	401	*	187	1.73321	5.37786	1.51037e-08	ATAC_KO_PBS_unique	75.8178	22.8046	Intron (ENSMUST00000028347.12/56878, intron 1 of 13)	2	60842297	60889030	46734	2	56878	ENSMUST00000132529.7	-21736	ENSMUSG00000026970	Rbms1	RNA binding motif, single stranded interacting protein 1
chr12	46856552	46857151	600	*	415	1.46621	5.85109	1.51845e-08	ATAC_KO_PBS_unique	95.9489	34.727	Distal Intergenic	12	46694517	46818929	124413	2	664883	ENSMUST00000021438.7	-37623	ENSMUSG00000021047	Nova1	neuro-oncological ventral antigen 1
chr16	36720223	36720814	592	*	250	1.46621	5.85109	1.51845e-08	ATAC_KO_PBS_unique	95.9489	34.727	Intron (ENSMUST00000023617.12/106347, intron 5 of 7)	16	36715538	36722260	6723	1	106347	ENSMUST00000128084.1	4685	ENSMUSG00000022900	Ildr1	immunoglobulin-like domain containing receptor 1
chr7	145293317	145293544	228	*	90	3.49376	3.39721	1.5345e-08	ATAC_KO_PBS_unique	35.3611	3.13905	Distal Intergenic	7	145300828	145309557	8730	1	211577	ENSMUST00000033386.11	-7284	ENSMUSG00000031070	Mrgprf	MAS-related GPR, member F
chr5	96221749	96222362	614	*	291	1.50509	5.7539	1.60537e-08	merged_common	90.9149	32.0301	Intron (ENSMUST00000117766.7/94061, intron 3 of 9)	5	96210144	96239684	29541	1	94061	ENSMUST00000121477.1	11605	ENSMUSG00000029486	Mrpl1	mitochondrial ribosomal protein L1
chr2	103583153	103583763	611	*	322	1.54831	5.6496	1.64369e-08	merged_common	85.8505	29.3532	Intron (ENSMUST00000076212.3/99382, intron 1 of 16)	2	103566310	103718423	152114	1	99382	ENSMUST00000076212.3	16843	ENSMUSG00000032724	Abtb2	ankyrin repeat and BTB (POZ) domain containing 2
chr2	130730805	130731242	438	*	156	1.77548	5.31468	1.68323e-08	ATAC_KO_PBS_unique	73.6401	21.5101	Promoter	2	130712304	130730909	18606	2	228602	ENSMUST00000138758.1	0	ENSMUSG00000027309	4930402H24Rik	RIKEN cDNA 4930402H24 gene
chr7	25754128	25756598	2471	*	818	-0.6058	8.28435	1.71555e-08	merged_common	252.729	384.609	Promoter	7	25721165	25754757	33593	2	232989	ENSMUST00000206832.1	0	ENSMUSG00000040725	Hnrnpul1	heterogeneous nuclear ribonucleoprotein U-like 1
chr8	117198073	117198816	744	*	278	1.11201	6.58371	1.73906e-08	merged_common	141.016	65.2409	Intron (ENSMUST00000064488.10/209239, intron 9 of 10)	8	117158137	117215997	57861	1	209239	ENSMUST00000162997.2	39936	ENSMUSG00000052557	Gan	giant axonal neuropathy
chr13	28512496	28513501	1006	*	460	-1.11288	6.58214	1.73906e-08	merged_common	65.1503	140.905	Intron (ENSMUST00000134787.7/72518, intron 1 of 2)	13	28460941	28516781	55841	2	72518	ENSMUST00000154298.1	3280	NA	2610307P16Rik	RIKEN cDNA 2610307P16 gene
chr7	16874228	16875886	1659	*	1006	-0.6087	8.26428	1.74991e-08	merged_common	248.988	379.677	Promoter	7	16871347	16874886	3540	2	320950	ENSMUST00000181501.2	0	ENSMUSG00000097842	9330104G04Rik	RIKEN cDNA 9330104G04 gene
chr2	148884811	148885135	325	*	195	-1.47067	5.82012	1.76502e-08	merged_common	33.937	94.0564	Distal Intergenic	2	148872848	148875692	2845	2	13010	ENSMUST00000144845.1	-9119	ENSMUSG00000027447	Cst3	cystatin C
chr2	106973974	106974774	801	*	495	0.98541	6.93393	1.76735e-08	merged_common	172.044	86.8964	Promoter	2	106962527	106974424	11898	2	212772	ENSMUST00000028536.12	0	ENSMUSG00000027122	Arl14ep	ADP-ribosylation factor-like 14 effector protein
chr10	24642652	24643236	585	*	355	1.9493	5.0084	1.78395e-08	ATAC_KO_PBS_unique	63.2525	16.3787	Intron (ENSMUST00000105520.7/18605, intron 24 of 24)	10	24668486	24674258	5773	2	18605	ENSMUST00000142974.1	31022	ENSMUSG00000037370	Enpp1	ectonucleotide pyrophosphatase/phosphodiesterase 1
chr12	76614596	76615715	1120	*	458	1.04191	6.78267	1.79303e-08	merged_common	157.983	76.7298	Intron (ENSMUST00000021458.12/20741, intron 15 of 35)	12	76583231	76584086	856	2	20741	ENSMUST00000170532.1	-30510	ENSMUSG00000021061	Sptb	spectrin beta, erythrocytic
chr17	26535062	26535941	880	*	390	0.97076	6.97437	1.83845e-08	merged_common	176.039	89.8216	Distal Intergenic	17	26561489	26656931	95443	1	67458	ENSMUST00000167662.7	-25548	ENSMUSG00000001576	Ergic1	endoplasmic reticulum-golgi intermediate compartment (ERGIC) 1
chr10	94310297	94310718	422	*	307	2.45204	4.39068	1.84729e-08	ATAC_KO_PBS_unique	49.0676	8.96722	Distal Intergenic	10	94311949	94430897	118949	1	319880	ENSMUST00000147869.1	-1231	ENSMUSG00000020023	Tmcc3	transmembrane and coiled coil domains 3
chr9	120063440	120065214	1775	*	1141	-1.14805	6.50211	1.85196e-08	merged_common	60.888	134.936	Intron (ENSMUST00000177637.1/13051, intron 1 of 2)	9	119901616	120068283	166668	2	13051	ENSMUST00000177637.1	3069	ENSMUSG00000052336	Cx3cr1	chemokine (C-X3-C motif) receptor 1
chr9	45086258	45086918	661	*	245	1.74563	5.29809	1.86676e-08	ATAC_KO_PBS_unique	72.0489	21.4853	Promoter	9	45086489	45093753	7265	1	270152	ENSMUST00000216333.1	0	ENSMUSG00000048534	Jaml	junction adhesion molecule like
chr14	86847235	86847731	497	*	89	1.74563	5.29809	1.86676e-08	ATAC_KO_PBS_unique	72.0489	21.4853	Intron (ENSMUST00000022599.13/56419, intron 22 of 27)	14	86656172	86789889	133718	2	56419	ENSMUST00000227638.1	-57346	ENSMUSG00000022021	Diaph3	diaphanous related formin 3
chr7	88271505	88271907	403	*	174	2.01316	4.92509	1.8798e-08	ATAC_KO_PBS_unique	61.0395	15.1213	Distal Intergenic	7	88278085	88310888	32804	1	13032	ENSMUST00000032779.11	-6178	ENSMUSG00000030560	Ctsc	cathepsin C
chr13	106759890	106761129	1240	*	487	-0.78177	7.56697	1.93302e-08	merged_common	144.616	248.63	Exon (ENSMUST00000225713.1/ENSMUST00000225713.1, exon 1 of 2)	13	106811888	106836321	24434	2	76582	ENSMUST00000191312.1	75192	ENSMUSG00000042590	Ipo11	importin 11
chr7	25651103	25652004	902	*	364	-1.18837	6.41684	1.93898e-08	merged_common	56.5971	128.982	Intron (ENSMUST00000071329.7/12039, intron 1 of 8)	7	25629946	25658981	29036	2	12039	ENSMUST00000071329.7	6977	ENSMUSG00000060376	Bckdha	branched chain ketoacid dehydrogenase E1, alpha polypeptide
chr17	69222002	69223013	1012	*	501	1.18119	6.41724	1.93898e-08	merged_common	128.697	56.7538	Intron (ENSMUST00000223610.1/13823, intron 3 of 3)	17	69207882	69289099	81218	1	13823	ENSMUST00000233964.1	14120	ENSMUSG00000024044	Epb41l3	erythrocyte membrane protein band 4.1 like 3
chr15	102404976	102406953	1978	*	969	-0.41564	9.32329	1.95251e-08	merged_common	554.664	739.861	Promoter	15	102406143	102408235	2093	1	20683	ENSMUST00000170884.7	0	ENSMUSG00000001280	Sp1	trans-acting transcription factor 1
chr13	117237079	117237468	390	*	266	2.08412	4.83621	1.95734e-08	ATAC_KO_PBS_unique	58.8214	13.8724	Intron (ENSMUST00000225981.1/13723, intron 3 of 3)	13	117220744	117226070	5327	1	13723	ENSMUST00000225460.1	16335	ENSMUSG00000021728	Emb	embigin
chrX	106011333	106012128	796	*	509	1.186	6.38306	1.96953e-08	merged_common	125.894	55.3327	Promoter	20	105968084	106011899	43816	2	67075	ENSMUST00000033583.13	0	ENSMUSG00000031232	Magt1	magnesium transporter 1
chr4	133812974	133814819	1846	*	833	-0.68987	7.90576	1.97555e-08	merged_common	188.814	304.584	Distal Intergenic	4	133850557	133860930	10374	2	20111	ENSMUST00000173989.7	46111	ENSMUSG00000003644	Rps6ka1	ribosomal protein S6 kinase polypeptide 1
chr13	59656253	59657474	1222	*	405	-0.78981	7.54439	1.98426e-08	merged_common	141.974	245.452	Intron (ENSMUST00000022039.6/105348, intron 3 of 9)	13	59645092	59675772	30681	2	105348	ENSMUST00000225333.1	18298	ENSMUSG00000021556	Golm1	golgi membrane protein 1
chr5	137628023	137629668	1646	*	854	-0.52204	8.67133	2.00264e-08	merged_common	340.217	488.546	Promoter	5	137629175	137642899	13725	1	100316903	ENSMUST00000177545.1	0	NA	Gm20605	predicted gene 20605
chr14	57543732	57544021	290	*	87	2.16361	4.7409	2.01026e-08	ATAC_KO_PBS_unique	56.599	12.6327	Distal Intergenic	14	57524777	57543166	18390	1	239114	ENSMUST00000089494.5	18955	ENSMUSG00000050222	Il17d	interleukin 17D
chrX	167091933	167092362	430	*	108	2.16361	4.7409	2.01026e-08	ATAC_KO_PBS_unique	56.599	12.6327	Intron (ENSMUST00000146929.1/ENSMUST00000146929.1, intron 3 of 3)	20	167063336	167070380	7045	2	667794	ENSMUST00000126769.7	-21553	ENSMUSG00000086008	Gm8817	predicted gene 8817
chr10	120247511	120247894	384	*	83	2.21092	4.61441	2.01552e-08	ATAC_KO_PBS_unique	52.7051	11.3841	Distal Intergenic	10	120227186	120232071	4886	1	66225	ENSMUST00000130198.2	20325	ENSMUSG00000020224	Llph	LLP homolog, long-term synaptic facilitation (Aplysia)
chr8	126807274	126808012	739	*	246	1.45675	5.78753	2.04902e-08	ATAC_KO_PBS_unique	91.513	33.3394	Distal Intergenic	8	126839233	126851473	12241	1	414091	ENSMUST00000212914.1	-31221	NA	A630001O12Rik	RIKEN cDNA A630001O12 gene
chr19	17166195	17166716	522	*	368	1.46819	5.79389	2.04902e-08	merged_common	92.2825	33.3542	Intron (ENSMUST00000087689.4/353211, intron 9 of 19)	19	17138739	17221194	82456	1	353211	ENSMUST00000224059.1	27456	ENSMUSG00000039126	Prune2	prune homolog 2
chr3	19215690	19216068	379	*	295	1.79023	5.23125	2.0591e-08	ATAC_KO_PBS_unique	69.8586	20.1979	3' UTR	3	19211572	19216222	4651	1	67472	ENSMUST00000131053.1	4118	ENSMUSG00000027601	Mtfr1	mitochondrial fission regulator 1
chr7	131559985	131560937	953	*	387	0.88232	7.2294	2.08517e-08	merged_common	203.736	110.526	Promoter	7	131560222	131571892	11671	1	12237	ENSMUST00000084502.6	0	ENSMUSG00000066979	Bub3	BUB3 mitotic checkpoint protein
chr4	135898408	135899047	640	*	223	1.62303	5.55164	2.1489e-08	ATAC_KO_PBS_unique	82.3191	26.7251	Intron (ENSMUST00000097843.8/12802, intron 1 of 1)	4	135895394	135920207	24814	1	12802	ENSMUST00000097843.8	3014	ENSMUSG00000062585	Cnr2	cannabinoid receptor 2 (macrophage)
chr14	20765639	20766225	587	*	423	1.60998	5.54439	2.1489e-08	ATAC_KO_PBS_unique	81.5368	26.7117	Promoter	14	20760165	20765509	5345	2	12325	ENSMUST00000224245.1	-130	ENSMUSG00000021820	Camk2g	calcium/calmodulin-dependent protein kinase II gamma
chr12	8498054	8502555	4502	*	2072	-0.51333	8.7249	2.22156e-08	merged_common	354.154	505.499	Promoter	12	8497661	8500009	2349	2	11852	ENSMUST00000067384.5	0	ENSMUSG00000054364	Rhob	ras homolog family member B
chr18	60499770	60500763	994	*	345	0.90646	7.14068	2.23144e-08	merged_common	193.194	103.068	Intron (ENSMUST00000042710.6/106878, intron 1 of 1)	18	60474193	60501983	27791	2	106878	ENSMUST00000042710.6	1220	ENSMUSG00000038059	Smim3	small integral membrane protein 3
chr6	30047675	30048780	1106	*	378	-0.89586	7.17492	2.2546e-08	merged_common	105.932	197.109	Promoter	6	30047988	30153458	105471	1	18181	ENSMUST00000115212.7	0	ENSMUSG00000058440	Nrf1	nuclear respiratory factor 1
chr1	43521575	43521684	110	*	59	1.85476	5.16993	2.2575e-08	ATAC_KO_PBS_unique	68.4657	18.9293	Intron (ENSMUST00000187435.6/17974, intron 2 of 2)	1	43532405	43554062	21658	1	17974	ENSMUST00000202540.1	-10721	ENSMUSG00000066877	Nck2	non-catalytic region of tyrosine kinase adaptor protein 2
chr9	25486182	25486769	588	*	282	1.71886	5.36989	2.31896e-08	ATAC_KO_PBS_unique	75.0261	22.7921	Intron (ENSMUST00000040677.5/67484, intron 2 of 7)	9	25482867	25487313	4447	1	67484	ENSMUST00000156237.1	3315	ENSMUSG00000036611	Eepd1	endonuclease/exonuclease/phosphatase family domain containing 1
chr14	77343742	77344444	703	*	180	1.29685	6.15984	2.33422e-08	merged_common	112.071	45.6143	Exon (ENSMUST00000226306.1/ENSMUST00000226306.1, exon 1 of 1)	14	77312076	77577697	265622	1	239188	ENSMUST00000228148.1	31666	ENSMUSG00000022012	Enox1	ecto-NOX disulfide-thiol exchanger 1
chr5	53509192	53510182	991	*	449	1.241	6.25711	2.36939e-08	merged_common	117.589	49.7495	Intron (ENSMUST00000201991.3/19664, intron 1 of 6)	5	53466152	53649390	183239	1	19664	ENSMUST00000201991.3	43040	ENSMUSG00000039191	Rbpj	recombination signal binding protein for immunoglobulin kappa J region
chr8	61487463	61488343	881	*	264	1.05598	6.70536	2.37595e-08	merged_common	150.472	72.3725	Promoter	8	61487734	61506694	18961	1	234309	ENSMUST00000034058.13	0	ENSMUSG00000031641	Cbr4	carbonyl reductase 4
chr14	122181154	122181981	828	*	482	1.10493	6.57978	2.38066e-08	merged_common	140.288	65.2233	Promoter	14	122181704	122402234	220531	1	69634	ENSMUST00000026625.6	0	ENSMUSG00000025545	Clybl	citrate lyase beta like
chr11	97186771	97188895	2125	*	1406	-0.51952	8.67274	2.43723e-08	merged_common	340.847	488.597	Promoter	11	97159714	97187881	28168	2	16211	ENSMUST00000001479.4	0	ENSMUSG00000001440	Kpnb1	karyopherin (importin) beta 1
chr16	59583550	59583954	405	*	188	1.90817	5.09615	2.45821e-08	ATAC_KO_PBS_unique	66.2678	17.6557	Intron (ENSMUST00000172910.2/224273, intron 1 of 21)	16	59492088	59600979	108892	2	224273	ENSMUST00000172910.2	17025	ENSMUSG00000022723	Crybg3	beta-gamma crystallin domain containing 3
chr1	184617799	184618536	738	*	494	1.53588	5.6427	2.45839e-08	merged_common	85.0736	29.3392	Exon (ENSMUST00000192129.1/ENSMUST00000192129.1, exon 1 of 3)	1	184527841	184557691	29851	2	73590	ENSMUST00000188766.1	-60108	ENSMUSG00000101574	1700112H15Rik	RIKEN cDNA 1700112H15 gene
chr18	84681520	84682505	986	*	527	1.08155	6.66019	2.49487e-08	merged_common	147.132	69.5228	Promoter	18	84667470	84681996	14527	2	66054	ENSMUST00000168419.1	0	ENSMUSG00000024644	Cndp2	CNDP dipeptidase 2 (metallopeptidase M20 family)
chr17	73952043	73952588	546	*	396	1.37891	5.96574	2.51172e-08	merged_common	100.789	38.7543	Distal Intergenic	17	73883908	73950196	66289	2	22436	ENSMUST00000233621.1	-1847	ENSMUSG00000024066	Xdh	xanthine dehydrogenase
chr14	33216330	33217278	949	*	369	-1.13271	6.49514	2.55117e-08	merged_common	60.9175	133.574	Promoter	14	33216823	33369934	153112	1	239027	ENSMUST00000111956.8	0	ENSMUSG00000063506	Arhgap22	Rho GTPase activating protein 22
chr5	69556556	69557351	796	*	295	1.01273	6.8208	2.55339e-08	merged_common	160.582	79.5856	Promoter	5	69556923	69571730	14808	1	231279	ENSMUST00000154728.7	0	ENSMUSG00000029208	Guf1	GUF1 homolog, GTPase
chr5	104957889	104958780	892	*	580	0.93263	7.04613	2.56739e-08	merged_common	182.588	95.6581	Intron (ENSMUST00000031239.12/27405, intron 10 of 15)	5	104935679	104977834	42156	2	27405	ENSMUST00000130644.1	19054	ENSMUSG00000029299	Abcg3	ATP binding cassette subfamily G member 3
chr17	64821338	64821437	100	*	26	2.73179	4.08496	2.57072e-08	ATAC_KO_PBS_unique	43.7392	6.58446	Distal Intergenic	17	64832523	64836071	3549	2	78057	ENSMUST00000024896.3	14634	ENSMUSG00000024088	4930583I09Rik	RIKEN cDNA 4930583I09 gene
chr7	90059378	90060809	1432	*	1038	-0.99732	6.86778	2.68263e-08	merged_common	82.6602	165.013	Distal Intergenic	7	90029162	90049069	19908	1	319711	ENSMUST00000208266.1	30216	ENSMUSG00000097585	E230029C05Rik	RIKEN cDNA E230029C05 gene
chr13	56171755	56173692	1938	*	1358	-0.84652	7.29885	2.68318e-08	merged_common	117.425	211.148	Downstream (<1kb)	13	56173704	56178801	5098	2	212937	ENSMUST00000169652.2	5109	ENSMUSG00000049625	Tifab	TRAF-interacting protein with forkhead-associated domain, family member B
chr2	150673419	150674659	1241	*	635	0.87764	7.2268	2.70079e-08	merged_common	203.04	110.506	Distal Intergenic	2	150637980	150668500	30521	2	68738	ENSMUST00000141500.1	-4919	ENSMUSG00000027452	Acss1	acyl-CoA synthetase short-chain family member 1
chr11	19919878	19920701	824	*	608	1.17795	6.37859	2.74211e-08	merged_common	125.154	55.3156	Distal Intergenic	11	19924375	20024026	99652	1	114716	ENSMUST00000093299.12	-3674	ENSMUSG00000045671	Spred2	sprouty-related EVH1 domain containing 2
chr1	92082668	92083462	795	*	309	1.41053	5.8764	2.78383e-08	ATAC_KO_PBS_unique	95.7808	36.0302	Intron (ENSMUST00000097644.8/208727, intron 2 of 26)	1	92029966	92113331	83366	2	208727	ENSMUST00000185341.6	29869	ENSMUSG00000026313	Hdac4	histone deacetylase 4
chr9	5298012	5299051	1040	*	656	1.26249	6.18466	2.79526e-08	merged_common	112.666	46.9618	Promoter	9	5298517	5307265	8749	1	12362	ENSMUST00000027015.5	0	ENSMUSG00000025888	Casp1	caspase 1
chr10	87674889	87675398	510	*	310	1.56541	5.59089	2.82251e-08	ATAC_KO_PBS_unique	82.9169	28.0161	Distal Intergenic	10	87546673	87570332	23660	1	18478	ENSMUST00000217864.1	128216	ENSMUSG00000020051	Pah	phenylalanine hydroxylase
chr18	61486685	61486933	249	*	82	3.45819	3.37744	2.82671e-08	ATAC_KO_PBS_unique	34.4525	3.13474	Distal Intergenic	18	61493794	61536536	42743	2	328967	ENSMUST00000171629.1	49603	ENSMUSG00000045094	Arhgef37	Rho guanine nucleotide exchange factor (GEF) 37
chr3	19216334	19216585	252	*	74	1.91372	4.98864	2.84528e-08	ATAC_KO_PBS_unique	61.6274	16.3564	Intron (ENSMUST00000117529.7/67472, intron 5 of 7)	3	19211572	19216222	4651	1	67472	ENSMUST00000131053.1	4762	ENSMUSG00000027601	Mtfr1	mitochondrial fission regulator 1
chr15	11716170	11716710	541	*	147	1.91372	4.98864	2.84528e-08	ATAC_KO_PBS_unique	61.6274	16.3564	Distal Intergenic	15	11842260	11890988	48729	2	18162	ENSMUST00000226139.1	174278	ENSMUSG00000022206	Npr3	natriuretic peptide receptor 3
chr4	32179692	32180299	608	*	309	1.73044	5.28966	2.89047e-08	ATAC_KO_PBS_unique	71.2531	21.4728	Distal Intergenic	4	32238804	32586104	347301	1	12014	ENSMUST00000108180.8	-58505	ENSMUSG00000040270	Bach2	BTB and CNC homology, basic leucine zipper transcription factor 2
chr15	53138809	53139243	435	*	343	1.73044	5.28966	2.89047e-08	ATAC_KO_PBS_unique	71.2531	21.4728	Intron (ENSMUST00000077273.8/14042, intron 1 of 10)	15	53089931	53107868	17938	2	14042	ENSMUST00000140798.1	-30941	ENSMUSG00000061731	Ext1	exostoses (multiple) 1
chr15	66272289	66272653	365	*	243	1.73044	5.28966	2.89047e-08	ATAC_KO_PBS_unique	71.2531	21.4728	Intron (ENSMUST00000070256.8/110862, intron 1 of 14)	15	65986387	66286642	300256	2	110862	ENSMUST00000070256.8	13989	ENSMUSG00000056258	Kcnq3	potassium voltage-gated channel, subfamily Q, member 3
chr4	3627100	3627363	264	*	103	1.99474	4.91486	3.01757e-08	ATAC_KO_PBS_unique	60.2225	15.1106	Distal Intergenic	4	3605637	3615283	9647	1	116940	ENSMUST00000146315.1	21463	ENSMUSG00000028233	Tgs1	trimethylguanosine synthase 1
chr15	53474073	53474764	692	*	266	1.99474	4.91486	3.01757e-08	ATAC_KO_PBS_unique	60.2225	15.1106	Intron (ENSMUST00000078673.13/320679, intron 4 of 4)	15	53064038	53346159	282122	2	14042	ENSMUST00000077273.8	-127914	ENSMUSG00000061731	Ext1	exostoses (multiple) 1
chr6	87085184	87085385	202	*	75	2.84773	3.85712	3.08662e-08	ATAC_KO_PBS_unique	38.8808	5.40111	Exon (ENSMUST00000113658.7/14583, exon 16 of 19)	6	87076808	87086356	9549	1	14583	ENSMUST00000146410.1	8376	ENSMUSG00000029992	Gfpt1	glutamine fructose-6-phosphate transaminase 1
chr17	48408429	48410728	2300	*	1534	-0.54188	8.5316	3.10546e-08	merged_common	306.695	446.507	Promoter	17	48410014	48417254	7241	1	106821	ENSMUST00000167180.7	0	ENSMUSG00000040771	Oard1	O-acyl-ADP-ribose deacylase 1
chr1	64078364	64078970	607	*	196	1.65182	5.41486	3.14661e-08	ATAC_KO_PBS_unique	75.6239	24.0664	Exon (ENSMUST00000149820.1/ENSMUST00000149820.1, exon 1 of 4)	1	64042438	64042501	64	2	102466760	ENSMUST00000184798.1	-35863	ENSMUSG00000098487	Mir6899	microRNA 6899
chr3	95706176	95706709	534	*	285	1.65182	5.41486	3.14661e-08	ATAC_KO_PBS_unique	75.6239	24.0664	Distal Intergenic	3	95676201	95687917	11717	2	229595	ENSMUST00000117782.7	-18259	ENSMUSG00000015850	Adamtsl4	ADAMTS-like 4
chr11	68871643	68872289	647	*	338	1.65182	5.41486	3.14661e-08	ATAC_KO_PBS_unique	75.6239	24.0664	Promoter	11	68829303	68871858	42556	2	83431	ENSMUST00000101017.8	0	ENSMUSG00000018736	Ndel1	nudE neurodevelopment protein 1 like 1
chr16	44988666	44989392	727	*	189	1.66601	5.42275	3.14661e-08	ATAC_KO_PBS_unique	76.4135	24.0797	Distal Intergenic	16	44965254	44966854	1601	1	74603	ENSMUST00000163358.1	23412	ENSMUSG00000036172	Cd200r3	CD200 receptor 3
chr11	76033852	76034100	249	*	80	2.06488	4.82553	3.16393e-08	ATAC_KO_PBS_unique	57.9996	13.8622	Distal Intergenic	11	76019194	76027782	8589	2	76566	ENSMUST00000021207.6	-6070	ENSMUSG00000020846	Rflnb	refilin B
chr14	61310187	61310836	650	*	411	2.06488	4.82553	3.16393e-08	ATAC_KO_PBS_unique	57.9996	13.8622	Promoter	14	61309753	61311936	2184	1	219144	ENSMUST00000055159.7	434	ENSMUSG00000043157	Arl11	ADP-ribosylation factor-like 11
chr17	62574404	62574916	513	*	336	1.77449	5.22251	3.20304e-08	ATAC_KO_PBS_unique	69.0589	20.1857	Distal Intergenic	17	62607319	62881144	273826	2	13640	ENSMUST00000078839.4	306228	ENSMUSG00000048915	Efna5	ephrin A5
chr7	63999651	64000123	473	*	143	1.4442	5.83886	3.25268e-08	ATAC_KO_PBS_unique	94.416	34.6975	Distal Intergenic	7	63886351	63938915	52565	2	50794	ENSMUST00000063694.9	-60736	ENSMUSG00000052040	Klf13	Kruppel-like factor 13
chr15	10876219	10876820	602	*	322	1.43306	5.83267	3.25268e-08	ATAC_KO_PBS_unique	93.6495	34.6826	Distal Intergenic	15	10814827	10835214	20388	1	100502601	ENSMUST00000228418.1	61392	NA	Gm19276	predicted gene, 19276
chr18	36708647	36709280	634	*	292	1.29501	6.11366	3.26157e-08	merged_common	108.471	44.2055	Distal Intergenic	18	36684923	36695925	11003	2	240216	ENSMUST00000115682.1	-12722	ENSMUSG00000044719	E230025N22Rik	Riken cDNA E230025N22 gene
chr18	56733866	56734450	585	*	208	2.31151	4.50141	3.26969e-08	ATAC_KO_PBS_unique	50.4634	10.1658	Intron (ENSMUST00000025486.8/16906, intron 5 of 10)	18	56728441	56733456	5016	1	16906	ENSMUST00000128651.1	5425	ENSMUSG00000024590	Lmnb1	lamin B1
chr11	96874737	96875248	512	*	270	-2.34306	4.45943	3.26969e-08	ATAC_Control_PBS_unique	9.7669	49.555	Distal Intergenic	11	96854131	96861203	7073	1	56358	ENSMUST00000147710.1	20606	ENSMUSG00000018672	Copz2	coatomer protein complex, subunit zeta 2
chr2	24344971	24345388	418	*	274	2.14348	4.72972	3.27385e-08	ATAC_KO_PBS_unique	55.7717	12.623	Promoter	2	24345288	24349807	4520	1	16181	ENSMUST00000114485.8	0	ENSMUSG00000026981	Il1rn	interleukin 1 receptor antagonist
chr9	66114121	66114882	762	*	474	1.27843	6.1496	3.30927e-08	merged_common	110.57	45.5818	Intron (ENSMUST00000034946.14/56440, intron 1 of 14)	9	66104475	66105724	1250	2	56440	ENSMUST00000146893.1	-8397	ENSMUSG00000032382	Snx1	sorting nexin 1
chr5	113796343	113797540	1198	*	520	-1.28419	6.15871	3.30927e-08	merged_common	45.779	111.493	5' UTR	5	113795638	113800446	4809	2	231633	ENSMUST00000160374.1	2906	ENSMUSG00000054675	Tmem119	transmembrane protein 119
chr17	35820898	35822250	1353	*	715	1.2382	6.21392	3.33087e-08	merged_common	114.01	48.3291	Promoter	17	35821684	35822923	1240	1	15937	ENSMUST00000003635.6	0	ENSMUSG00000003541	Ier3	immediate early response 3
chr15	25940392	25940702	311	*	212	2.1891	4.60229	3.33821e-08	ATAC_KO_PBS_unique	51.8704	11.3746	Promoter	15	25940702	25973668	32967	1	66270	ENSMUST00000227275.1	0	ENSMUSG00000022270	Retreg1	reticulophagy regulator 1
chr12	112628630	112629878	1249	*	771	1.13015	6.49461	3.50622e-08	merged_common	133.406	60.9492	Intron (ENSMUST00000021726.7/11565, intron 2 of 12)	12	112620093	112641360	21268	1	11565	ENSMUST00000180015.8	8537	ENSMUSG00000011148	Adssl1	adenylosuccinate synthetase like 1
chr15	6080868	6081678	811	*	581	1.8223	5.15189	3.52897e-08	ATAC_KO_PBS_unique	66.8585	18.9056	Distal Intergenic	15	6299788	6435520	135733	1	13132	ENSMUST00000159552.1	-218110	ENSMUSG00000022150	Dab2	disabled 2, mitogen-responsive phosphoprotein
chr7	127477439	127479401	1963	*	601	-0.53156	8.56918	3.5299e-08	merged_common	315.917	456.655	Promoter	7	127479199	127491506	12308	1	14123	ENSMUST00000205432.2	0	ENSMUSG00000042423	Fbrs	fibrosin
chr17	50737016	50737704	689	*	145	-1.57567	5.51118	3.69444e-08	ATAC_Control_PBS_unique	26.4161	78.7395	Intron (ENSMUST00000024717.9/72238, intron 21 of 21)	17	50698688	50699443	756	1	12228	ENSMUST00000061681.8	38328	ENSMUSG00000022863	Btg3	B cell translocation gene 3
chr2	17064952	17066074	1123	*	540	0.99258	6.8361	3.81432e-08	merged_common	161.164	80.9977	Distal Intergenic	2	17348694	17361086	12393	2	74103	ENSMUST00000138241.1	295012	ENSMUSG00000053702	Nebl	nebulette
chr12	35889382	35889702	321	*	173	1.31226	6.07678	3.85359e-08	merged_common	106.367	42.833	Distal Intergenic	12	35925620	35949736	24117	1	403205	ENSMUST00000042101.4	-35918	ENSMUSG00000036231	Agr3	anterior gradient 3
chr10	111515800	111516652	853	*	690	1.30253	6.07137	3.85359e-08	merged_common	105.612	42.8168	Distal Intergenic	10	111507696	111508165	470	1	21664	ENSMUST00000186359.1	8104	ENSMUSG00000020205	Phlda1	pleckstrin homology like domain, family A, member 1
chr18	54852978	54853431	454	*	331	1.30253	6.07137	3.85359e-08	merged_common	105.612	42.8168	Distal Intergenic	18	54888045	54990180	102136	2	269023	ENSMUST00000064763.5	136749	ENSMUSG00000052713	Zfp608	zinc finger protein 608
chr1	143916206	143919329	3124	*	570	-0.65559	7.98391	3.86464e-08	merged_common	201.707	317.74	Distal Intergenic	1	144001883	144004032	2150	2	19735	ENSMUST00000153527.2	84703	ENSMUSG00000026360	Rgs2	regulator of G-protein signaling 2
chr9	73085548	73086633	1086	*	440	1.20945	6.28017	3.92575e-08	merged_common	118.184	51.1069	Intron (ENSMUST00000184146.7/11891, intron 5 of 6)	9	73101836	73102887	1052	1	66991	ENSMUST00000172578.1	-15203	ENSMUSG00000092622	Khdc3	KH domain containing 3, subcortical maternal complex member
chr18	4313650	4314518	869	*	415	1.20945	6.28017	3.92575e-08	merged_common	118.184	51.1069	Distal Intergenic	18	4333845	4335048	1204	2	26410	ENSMUST00000173708.1	20530	ENSMUSG00000024235	Map3k8	mitogen-activated protein kinase kinase kinase 8
chr17	88132604	88133501	898	*	428	1.25337	6.1796	3.94831e-08	merged_common	111.917	46.9455	Distal Intergenic	17	88125512	88131006	5495	1	225058	ENSMUST00000183295.1	7092	ENSMUSG00000058869	Gm4832	predicted gene 4832
chr9	121636051	121637042	992	*	411	-1.11638	6.50421	4.03249e-08	merged_common	61.6496	133.658	5' UTR	9	121578049	121641498	63450	2	69032	ENSMUST00000213757.1	4456	ENSMUSG00000032530	Lyzl4	lysozyme-like 4
chr10	80751239	80751872	634	*	483	1.39957	5.87031	4.04921e-08	merged_common	95.0158	36.015	Distal Intergenic	10	80755206	80795461	40256	1	208266	ENSMUST00000105336.8	-3334	ENSMUSG00000061589	Dot1l	DOT1-like, histone H3 methyltransferase (S. cerevisiae)
chr3	122372559	122373372	814	*	266	1.50803	5.69266	4.06681e-08	ATAC_KO_PBS_unique	87.2253	30.6676	Intron (ENSMUST00000196134.1/29815, intron 6 of 6)	3	122419757	122426866	7110	1	29815	ENSMUST00000200544.1	-46385	ENSMUSG00000028121	Bcar3	breast cancer anti-estrogen resistance 3
chr5	16552488	16553894	1407	*	292	1.50803	5.69266	4.06681e-08	ATAC_KO_PBS_unique	87.2253	30.6676	Promoter	5	16553495	16573434	19940	1	15234	ENSMUST00000195957.4	0	ENSMUSG00000028864	Hgf	hepatocyte growth factor
chr10	22353928	22354498	571	*	120	1.60262	5.46574	4.20992e-08	ATAC_KO_PBS_unique	77.0141	25.3591	Intron (ENSMUST00000178026.1/19370, intron 5 of 5)	10	22360552	22374139	13588	1	56554	ENSMUST00000182677.7	-6054	ENSMUSG00000078452	Raet1d	retinoic acid early transcript delta
chr12	25378140	25378627	488	*	179	1.60262	5.46574	4.20992e-08	ATAC_KO_PBS_unique	77.0141	25.3591	Intron (ENSMUST00000221460.1/ENSMUST00000221460.1, intron 2 of 3)	12	25129174	25134931	5758	1	432641	ENSMUST00000223429.1	248966	NA	Gm17746	predicted gene, 17746
chr17	62627569	62628012	444	*	141	1.55249	5.58371	4.22105e-08	ATAC_KO_PBS_unique	82.1367	28.0021	Intron (ENSMUST00000076840.11/13640, intron 2 of 4)	17	62607319	62881144	273826	2	13640	ENSMUST00000078839.4	253132	ENSMUSG00000048915	Efna5	ephrin A5
chr4	88537087	88538134	1048	*	446	0.97283	6.85119	4.25622e-08	merged_common	161.748	82.4116	Distal Intergenic	4	88522025	88522774	750	2	15977	ENSMUST00000055671.4	-14313	ENSMUSG00000048806	Ifnb1	interferon beta 1, fibroblast
chr7	80803012	80803688	677	*	446	1.3388	5.99434	4.4269e-08	merged_common	101.388	40.0836	Promoter	7	80711583	80803416	91834	2	29875	ENSMUST00000167377.2	0	ENSMUSG00000030536	Iqgap1	IQ motif containing GTPase activating protein 1
chr6	127165718	127165978	261	*	84	2.70445	4.06978	4.43576e-08	ATAC_KO_PBS_unique	42.8732	6.57757	Intron (ENSMUST00000180811.1/77558, intron 1 of 2)	6	127146023	127152193	6171	2	12444	ENSMUST00000201902.3	-13525	ENSMUSG00000000184	Ccnd2	cyclin D2
chr16	36655942	36656237	296	*	222	2.70445	4.06978	4.43576e-08	ATAC_KO_PBS_unique	42.8732	6.57757	Intron (ENSMUST00000089620.10/12524, intron 1 of 7)	16	36603869	36666077	62209	2	12524	ENSMUST00000089620.10	9840	ENSMUSG00000022901	Cd86	CD86 antigen
chr4	63668336	63668649	314	*	221	1.69953	5.27248	4.46137e-08	ATAC_KO_PBS_unique	69.6593	21.4472	Distal Intergenic	4	63634421	63639440	5020	1	102632940	ENSMUST00000147067.1	33915	ENSMUSG00000086817	Gm11482	predicted gene 11482
chr2	93126605	93127009	405	*	184	-1.74253	5.26325	4.46137e-08	ATAC_Control_PBS_unique	20.9952	70.2543	Distal Intergenic	2	93187548	93198919	11372	1	277414	ENSMUST00000150462.7	-60539	ENSMUSG00000068735	Trp53i11	transformation related protein 53 inducible protein 11
chr12	8347444	8348541	1098	*	745	-0.77215	7.48915	4.55079e-08	merged_common	137.48	234.79	Distal Intergenic	12	8317611	8324033	6423	1	58240	ENSMUST00000220300.1	29833	ENSMUSG00000020605	Hs1bp3	HCLS1 binding protein 3
chr9	44570892	44571669	778	*	254	1.27592	6.10305	4.63486e-08	merged_common	106.966	44.1729	Distal Intergenic	9	44511787	44561877	50091	2	12145	ENSMUST00000215293.1	-9015	ENSMUSG00000047880	Cxcr5	chemokine (C-X-C motif) receptor 5
chr15	84315326	84316099	774	*	444	1.26913	6.14443	4.67935e-08	merged_common	109.82	45.5653	3' UTR	15	84324026	84327050	3025	1	64099	ENSMUST00000127551.1	-7927	ENSMUSG00000022439	Parvg	parvin, gamma
chr9	120776404	120777001	598	*	286	1.42181	5.82642	4.74035e-08	ATAC_KO_PBS_unique	92.8819	34.6676	Distal Intergenic	9	120913774	120915252	1479	2	76402	ENSMUST00000188320.1	138251	ENSMUSG00000100146	1700020M21Rik	RIKEN cDNA 1700020M21 gene
chr15	96466500	96467028	529	*	276	1.42181	5.82642	4.74035e-08	merged_common	92.8819	34.6676	Distal Intergenic	15	96413656	96460843	47188	2	72193	ENSMUST00000047835.7	-5657	ENSMUSG00000033228	Scaf11	SR-related CTD-associated factor 11
chr3	135191767	135192245	479	*	305	1.63747	5.40689	4.78285e-08	ATAC_KO_PBS_unique	74.8342	24.0532	Distal Intergenic	3	135212537	135273611	61075	1	229841	ENSMUST00000062893.11	-20292	ENSMUSG00000045328	Cenpe	centromere protein E
chr1	164405416	164405908	493	*	143	1.97606	4.90448	4.82811e-08	ATAC_KO_PBS_unique	59.4049	15.0997	Intron (ENSMUST00000193808.5/171567, intron 14 of 15)	1	164373269	164437292	64024	1	171567	ENSMUST00000192710.1	32147	ENSMUSG00000026575	Nme7	NME/NM23 family member 7
chr7	113780341	113780699	359	*	146	1.9571	4.89395	4.82811e-08	ATAC_KO_PBS_unique	58.5866	15.0887	Intron (ENSMUST00000046687.15/233744, intron 1 of 15)	7	113766174	113932081	165908	1	233744	ENSMUST00000084696.5	14167	ENSMUSG00000038156	Spon1	spondin 1, (f-spondin) extracellular matrix protein
chr10	88417660	88418050	391	*	219	1.97606	4.90448	4.82811e-08	ATAC_KO_PBS_unique	59.4049	15.0997	Intron (ENSMUST00000151273.7/432486, intron 4 of 19)	10	88429566	88433288	3723	1	432486	ENSMUST00000132738.1	-11516	ENSMUSG00000035311	Gnptab	N-acetylglucosamine-1-phosphate transferase, alpha and beta subunits
chr10	117284940	117285425	486	*	216	1.97606	4.90448	4.82811e-08	ATAC_KO_PBS_unique	59.4049	15.0997	Downstream (2-3kb)	10	117277331	117282321	4991	2	17105	ENSMUST00000092163.8	-2619	ENSMUSG00000069516	Lyz2	lysozyme 2
chr11	17180638	17181056	419	*	337	1.97606	4.90448	4.82811e-08	ATAC_KO_PBS_unique	59.4049	15.0997	Intron (ENSMUST00000102880.4/19058, intron 1 of 5)	11	17182107	17232914	50808	1	103784	ENSMUST00000151431.1	-1051	ENSMUSG00000078970	Wdr92	WD repeat domain 92
chr12	119484028	119484512	485	*	177	1.97606	4.90448	4.82811e-08	ATAC_KO_PBS_unique	59.4049	15.0997	Distal Intergenic	12	119443410	119466934	23525	1	238455	ENSMUST00000048880.6	40618	ENSMUSG00000041886	Macc1	metastasis associated in colon cancer 1
chr17	33639799	33640602	804	*	184	1.58348	5.52967	4.84981e-08	ATAC_KO_PBS_unique	79.9713	26.6845	3' UTR	17	33638095	33645700	7606	1	378460	ENSMUST00000116619.8	1704	ENSMUSG00000032739	Pram1	PML-RAR alpha-regulated adaptor molecule 1
chr10	122690735	122691052	318	*	239	2.54018	4.22561	4.92008e-08	ATAC_KO_PBS_unique	45.1202	7.75711	Intron (ENSMUST00000162853.7/319468, intron 1 of 5)	10	122679315	122679415	101	1	102466884	ENSMUST00000185165.1	11420	ENSMUSG00000099225	Mir8104	microRNA 8104
chr17	23592617	23592822	206	*	130	2.54018	4.22561	4.92008e-08	ATAC_KO_PBS_unique	45.1202	7.75711	Intron (ENSMUST00000057029.4/22654, intron 1 of 5)	17	23575844	23586232	10389	2	22654	ENSMUST00000115516.10	-6385	ENSMUSG00000062012	Zfp13	zinc finger protein 13
chr6	83131398	83132087	690	*	424	1.75856	5.21366	4.96651e-08	ATAC_KO_PBS_unique	68.2587	20.1734	Distal Intergenic	6	83135463	83149558	14096	1	20166	ENSMUST00000135490.7	-3376	ENSMUSG00000034930	Rtkn	rhotekin
chr16	25058028	25060082	2055	*	1147	0.98038	6.82933	5.07525e-08	merged_common	159.733	80.9601	Promoter	16	25059639	25069058	9420	1	319487	ENSMUST00000181655.1	0	ENSMUSG00000096960	A230028O05Rik	RIKEN cDNA A230028O05 gene
chr1	21014517	21014855	339	*	162	2.04536	4.81468	5.09744e-08	ATAC_KO_PBS_unique	57.1769	13.8518	Intron (ENSMUST00000037998.5/170829, intron 2 of 10)	1	21004313	21043656	39344	2	170829	ENSMUST00000187210.1	28801	ENSMUSG00000041779	Tram2	translocating chain-associating membrane protein 2
chr5	123865349	123865725	377	*	177	2.04536	4.81468	5.09744e-08	ATAC_KO_PBS_unique	57.1769	13.8518	Promoter	5	123863570	123865499	1930	2	80885	ENSMUST00000057145.6	0	ENSMUSG00000045502	Hcar2	hydroxycarboxylic acid receptor 2
chr8	116627870	116628371	502	*	143	2.04536	4.81468	5.09744e-08	ATAC_KO_PBS_unique	57.1769	13.8518	Intron (ENSMUST00000109102.3/75796, intron 1 of 6)	8	116574400	116732991	158592	2	75796	ENSMUST00000109102.3	104620	ENSMUSG00000031758	Cdyl2	chromodomain protein, Y chromosome-like 2
chr15	5872131	5872522	392	*	88	2.04536	4.81468	5.09744e-08	ATAC_KO_PBS_unique	57.1769	13.8518	Distal Intergenic	15	5496318	5594983	98666	1	71432	ENSMUST00000228069.1	375813	ENSMUSG00000110018	5430437J10Rik	RIKEN cDNA 5430437J10 gene
chr13	22050530	22051473	944	*	524	1.1575	6.40408	5.13764e-08	merged_common	126.486	56.7021	Exon (ENSMUST00000225374.1/ENSMUST00000225374.1, exon 1 of 1)	13	22043214	22043676	463	1	319183	ENSMUST00000110452.1	7316	ENSMUSG00000069300	Hist1h2bj	histone cluster 1, H2bj
chr10	121290151	121290348	198	*	88	3.38397	3.33621	5.19503e-08	ATAC_KO_PBS_unique	32.6315	3.1258	Intron (ENSMUST00000064107.6/74694, intron 7 of 11)	10	121266609	121294648	28040	2	74694	ENSMUST00000218111.1	4300	ENSMUSG00000052302	Tbc1d30	TBC1 domain family, member 30
chr1	165471593	165471811	219	*	97	2.37921	4.35022	5.25688e-08	ATAC_KO_PBS_unique	46.5215	8.94211	Intron (ENSMUST00000027853.5/70456, intron 1 of 4)	1	165478142	165481119	2978	1	70456	ENSMUST00000138999.1	-6331	ENSMUSG00000026568	Mpc2	mitochondrial pyruvate carrier 2
chr2	117838497	117838877	381	*	89	2.37921	4.35022	5.25688e-08	ATAC_KO_PBS_unique	46.5215	8.94211	Intron (ENSMUST00000149239.1/73938, intron 2 of 5)	2	117821928	117909136	87209	1	73938	ENSMUST00000149239.1	16569	ENSMUSG00000086221	4930412B13Rik	RIKEN cDNA 4930412B13 gene
chr10	62491538	62492116	579	*	338	2.37921	4.35022	5.25688e-08	ATAC_KO_PBS_unique	46.5215	8.94211	Downstream (1-2kb)	10	62455277	62486805	31529	2	30930	ENSMUST00000105447.10	-4733	ENSMUSG00000020078	Vps26a	VPS26 retromer complex component A
chr13	74090335	74090583	249	*	76	2.40394	4.36396	5.25688e-08	ATAC_KO_PBS_unique	47.3709	8.95063	Distal Intergenic	13	74054958	74062299	7342	2	74470	ENSMUST00000220483.1	-28036	ENSMUSG00000021572	Cep72	centrosomal protein 72
chr5	18014238	18014654	417	*	205	2.12303	4.71836	5.31407e-08	ATAC_KO_PBS_unique	54.9434	12.613	Intron (ENSMUST00000030561.8/242851, intron 5 of 7)	5	17962549	18019834	57286	1	242851	ENSMUST00000030561.8	51689	ENSMUSG00000028777	Gnat3	guanine nucleotide binding protein, alpha transducing 3
chr15	36496335	36497097	763	*	484	1.30015	6.0222	5.37378e-08	merged_common	101.989	41.4162	Promoter	15	36477668	36496789	19122	2	68839	ENSMUST00000228630.1	0	ENSMUSG00000048307	Ankrd46	ankyrin repeat domain 46
chr14	103162853	103163306	454	*	165	-1.29446	6.02014	5.37378e-08	merged_common	41.4388	101.643	Intron (ENSMUST00000160758.7/105689, intron 55 of 82)	14	103113411	103155263	41853	2	105689	ENSMUST00000161008.7	-7590	ENSMUSG00000033004	Mycbp2	MYC binding protein 2, E3 ubiquitin protein ligase
chr4	16083178	16083733	556	*	118	1.68968	5.35368	5.41562e-08	ATAC_KO_PBS_unique	73.4413	22.7665	Distal Intergenic	4	15997121	16013888	16768	2	209212	ENSMUST00000037198.9	-69290	ENSMUSG00000041153	Osgin2	oxidative stress induced growth inhibitor family member 2
chr8	39642512	39643043	532	*	227	1.67484	5.34544	5.41562e-08	ATAC_KO_PBS_unique	72.6484	22.7536	Promoter	8	39581685	39642620	60936	2	20288	ENSMUST00000026021.13	0	ENSMUSG00000025044	Msr1	macrophage scavenger receptor 1
chr10	111516819	111516976	158	*	93	1.68968	5.35368	5.41562e-08	ATAC_KO_PBS_unique	73.4413	22.7665	Distal Intergenic	10	111507696	111508165	470	1	21664	ENSMUST00000186359.1	9123	ENSMUSG00000020205	Phlda1	pleckstrin homology like domain, family A, member 1
chr11	50212885	50213731	847	*	355	1.68968	5.35368	5.41562e-08	ATAC_KO_PBS_unique	73.4413	22.7665	Intron (ENSMUST00000147468.7/103534, intron 1 of 2)	11	50210890	50231099	20210	1	103534	ENSMUST00000147468.7	1995	ENSMUSG00000036620	Mgat4b	mannoside acetylglucosaminyltransferase 4, isoenzyme B
chrX	47976580	47976923	344	*	157	2.26513	4.47564	5.44949e-08	ATAC_KO_PBS_unique	48.7796	10.1477	Distal Intergenic	20	47960289	47965763	5475	1	320634	ENSMUST00000115013.1	16291	ENSMUSG00000001173	Ocrl	OCRL, inositol polyphosphate-5-phosphatase
chr11	82952412	82953030	619	*	335	1.49787	5.62159	5.45037e-08	ATAC_KO_PBS_unique	82.7407	29.2965	Promoter	11	82952102	82964840	12739	1	327978	ENSMUST00000067443.9	310	ENSMUSG00000054404	Slfn5	schlafen 5
chr19	16140438	16141306	869	*	337	1.49787	5.62159	5.45037e-08	ATAC_KO_PBS_unique	82.7407	29.2965	Intron (ENSMUST00000025541.5/14682, intron 1 of 6)	19	16133296	16316527	183232	1	14682	ENSMUST00000170229.1	7142	ENSMUSG00000024639	Gnaq	guanine nucleotide binding protein, alpha q polypeptide
chr7	58686401	58687080	680	*	391	1.20083	6.27537	5.48212e-08	merged_common	117.44	51.0895	Intron (ENSMUST00000168747.2/11982, intron 1 of 20)	7	58658246	58829420	171175	1	11982	ENSMUST00000168747.2	28155	ENSMUSG00000025324	Atp10a	ATPase, class V, type 10A
chr3	133626383	133627150	768	*	486	1.80576	5.1427	5.49863e-08	ATAC_KO_PBS_unique	66.0543	18.8935	Intron (ENSMUST00000193574.1/ENSMUST00000193574.1, intron 1 of 2)	3	133488535	133545139	56605	2	214133	ENSMUST00000197118.4	-81244	ENSMUSG00000040943	Tet2	tet methylcytosine dioxygenase 2
chr13	108267769	108268170	402	*	241	1.80576	5.1427	5.49863e-08	ATAC_KO_PBS_unique	66.0543	18.8935	Intron (ENSMUST00000022207.9/74559, intron 3 of 7)	13	108316332	108389585	73254	1	218581	ENSMUST00000051594.11	-48162	ENSMUSG00000021697	Depdc1b	DEP domain containing 1B
chr5	65247343	65247684	342	*	160	2.1669	4.58995	5.51069e-08	ATAC_KO_PBS_unique	51.0345	11.3648	Exon (ENSMUST00000203653.2/213081, exon 28 of 36)	5	65256425	65260409	3985	1	213081	ENSMUST00000203554.1	-8741	ENSMUSG00000037890	Wdr19	WD repeat domain 19
chr13	97172267	97173269	1003	*	541	-1.02617	6.68861	5.82502e-08	merged_common	72.28	147.206	Promoter	13	97171449	97177486	6038	1	320806	ENSMUST00000159321.1	818	ENSMUSG00000021666	Gfm2	G elongation factor, mitochondrial 2
chr13	105310608	105311440	833	*	226	1.49584	5.68589	5.99682e-08	ATAC_KO_PBS_unique	86.451	30.6533	Distal Intergenic	13	105249846	105294815	44970	2	71816	ENSMUST00000224749.1	-15793	ENSMUSG00000021720	Rnf180	ring finger protein 180
chr14	13981173	13981744	572	*	294	1.49584	5.68589	5.99682e-08	merged_common	86.451	30.6533	Intron (ENSMUST00000223880.1/246103, intron 1 of 12)	14	13995007	14103507	108501	1	246103	ENSMUST00000223714.1	-13263	ENSMUSG00000021738	Atxn7	ataxin 7
chr15	88128443	88128838	396	*	227	1.85724	5.06785	6.05033e-08	ATAC_KO_PBS_unique	63.8436	17.6211	Distal Intergenic	15	88314874	88372653	57780	1	328579	ENSMUST00000230919.1	-186036	ENSMUSG00000116331	B230214G05Rik	RIKEN cDNA B230214G05 gene
chr2	124610044	124610931	888	*	371	-1.16336	6.33156	6.28295e-08	merged_common	53.8129	120.529	Promoter	2	124610106	124662885	52780	1	214968	ENSMUST00000132088.1	0	ENSMUSG00000027200	Sema6d	sema domain, transmembrane domain (TM), and cytoplasmic domain, (semaphorin) 6D
chr4	105263519	105264025	507	*	263	1.52626	5.56914	6.2932e-08	ATAC_KO_PBS_unique	80.5755	27.9739	Distal Intergenic	4	105157347	105232764	75418	1	67916	ENSMUST00000064139.7	106172	ENSMUSG00000028517	Plpp3	phospholipid phosphatase 3
chr12	85569511	85570478	968	*	503	1.53944	5.57646	6.2932e-08	ATAC_KO_PBS_unique	81.3562	27.9881	Distal Intergenic	12	85599027	85639878	40852	1	81703	ENSMUST00000177587.8	-28549	ENSMUSG00000034271	Jdp2	Jun dimerization protein 2
chr14	119848852	119849646	795	*	665	1.53944	5.57646	6.2932e-08	ATAC_KO_PBS_unique	81.3562	27.9881	Intron (ENSMUST00000065904.4/50787, intron 1 of 1)	14	119749225	119751564	2340	1	75432	ENSMUST00000188582.1	99627	ENSMUSG00000100274	1700006F04Rik	RIKEN cDNA 1700006F04 gene
chr17	80112619	80113335	717	*	489	1.53944	5.57646	6.2932e-08	ATAC_KO_PBS_unique	81.3562	27.9881	Distal Intergenic	17	80127471	80185101	57631	1	319625	ENSMUST00000039205.10	-14136	ENSMUSG00000035473	Galm	galactose mutarotase
chr15	80071756	80072579	824	*	384	-0.89353	7.04976	6.3193e-08	merged_common	97.2074	180.584	Distal Intergenic	15	80078498	80078591	94	2	100302601	ENSMUST00000104546.1	6012	ENSMUSG00000077734	Snord83b	small nucleolar RNA, C/D box 83B
chr2	129319884	129320557	674	*	259	1.31819	5.98289	6.34208e-08	merged_common	99.8704	40.0518	Distal Intergenic	2	129299610	129309972	10363	2	16175	ENSMUST00000028882.1	-9912	ENSMUSG00000027399	Il1a	interleukin 1 alpha
chr2	150570065	150570668	604	*	352	1.58858	5.45794	6.35615e-08	ATAC_KO_PBS_unique	76.227	25.3454	Promoter	2	150570415	150578944	8530	1	13011	ENSMUST00000089200.2	0	ENSMUSG00000068129	Cst7	cystatin F (leukocystatin)
chr9	21161175	21161838	664	*	378	1.42181	5.76812	6.47844e-08	ATAC_KO_PBS_unique	89.2033	33.2946	Distal Intergenic	9	21165714	21213248	47535	1	18577	ENSMUST00000039413.14	-3876	ENSMUSG00000032177	Pde4a	phosphodiesterase 4A, cAMP specific
chr6	108827409	108829375	1967	*	1109	-0.54707	8.42348	6.66013e-08	merged_common	284.039	415.014	Promoter	6	108828641	108859356	30716	1	192193	ENSMUST00000204804.2	0	ENSMUSG00000030104	Edem1	ER degradation enhancer, mannosidase alpha-like 1
chr13	77134998	77135887	890	*	567	1.1028	6.44494	6.83429e-08	merged_common	127.676	59.4473	Promoter	13	77043088	77135473	92386	2	105377	ENSMUST00000151524.8	0	ENSMUSG00000021597	Slf1	SMC5-SMC6 complex localization factor 1
chr3	27193881	27194496	616	*	305	1.68379	5.26374	6.86365e-08	ATAC_KO_PBS_unique	68.8619	21.4342	Intron (ENSMUST00000046515.14/320024, intron 1 of 4)	3	27188441	27239584	51144	1	320024	ENSMUST00000140872.1	5440	ENSMUSG00000027698	Nceh1	neutral cholesterol ester hydrolase 1
chr4	102801321	102802202	882	*	369	1.68379	5.26374	6.86365e-08	ATAC_KO_PBS_unique	68.8619	21.4342	Intron (ENSMUST00000097948.8/73094, intron 2 of 7)	4	102760525	102973628	213104	1	73094	ENSMUST00000106882.8	40796	ENSMUSG00000028524	Sgip1	SH3-domain GRB2-like (endophilin) interacting protein 1
chr2	148873967	148874909	943	*	386	-1.48192	5.65899	6.96544e-08	ATAC_Control_PBS_unique	30.2325	84.4456	Promoter	2	148872472	148875451	2980	2	13010	ENSMUST00000149691.1	542	ENSMUSG00000027447	Cst3	cystatin C
chr7	4816667	4816888	222	*	128	3.03724	3.60473	7.48068e-08	ATAC_KO_PBS_unique	34.8564	4.24602	Distal Intergenic	7	4808014	4812590	4577	2	77891	ENSMUST00000079496.8	-4077	ENSMUSG00000060860	Ube2s	ubiquitin-conjugating enzyme E2S
chr8	82401182	82401417	236	*	166	3.03724	3.60473	7.48068e-08	ATAC_KO_PBS_unique	34.8564	4.24602	Promoter	8	82331637	82401833	70197	2	16168	ENSMUST00000209573.2	416	ENSMUSG00000031712	Il15	interleukin 15
chr5	115100587	115101679	1093	*	710	-1.16534	6.31331	7.48136e-08	merged_common	53.1	119.096	Downstream (1-2kb)	5	115094757	115098256	3500	1	74585	ENSMUST00000128678.1	5830	ENSMUSG00000029550	Sppl3	signal peptide peptidase 3
chr9	31243584	31243813	230	*	96	2.67653	4.05426	7.6295e-08	ATAC_KO_PBS_unique	42.006	6.57046	Distal Intergenic	9	31156190	31211815	55626	2	11804	ENSMUST00000213254.1	-31769	ENSMUSG00000031996	Aplp2	amyloid beta (A4) precursor-like protein 2
chr14	70354727	70355068	342	*	139	2.67653	4.05426	7.6295e-08	ATAC_KO_PBS_unique	42.006	6.57046	Distal Intergenic	14	70331077	70351425	20349	2	213053	ENSMUST00000142598.1	-3302	ENSMUSG00000022094	Slc39a14	solute carrier family 39 (zinc transporter), member 14
chr3	29071371	29071931	561	*	282	1.74243	5.2047	7.67551e-08	ATAC_KO_PBS_unique	67.4579	20.1609	Distal Intergenic	3	29082023	29153601	71579	1	75740	ENSMUST00000124809.7	-10092	ENSMUSG00000063600	Egfem1	EGF-like and EMI domain containing 1
chr3	96098303	96099037	735	*	494	1.72609	5.19562	7.67551e-08	ATAC_KO_PBS_unique	66.6561	20.1481	Distal Intergenic	3	96104527	96141518	36992	1	229603	ENSMUST00000132980.7	-5490	ENSMUSG00000038495	Otud7b	OTU domain containing 7B
chr5	68033276	68033747	472	*	285	1.74243	5.2047	7.67551e-08	ATAC_KO_PBS_unique	67.4579	20.1609	Intron (ENSMUST00000094715.7/433899, intron 1 of 3)	5	68031835	68166398	134564	1	433899	ENSMUST00000094715.7	1441	ENSMUSG00000068082	Grxcr1	glutaredoxin, cysteine rich 1
chr12	16999809	17000463	655	*	281	1.72609	5.19562	7.67551e-08	ATAC_KO_PBS_unique	66.6561	20.1481	Promoter	12	16988648	17000032	11385	2	217430	ENSMUST00000140933.1	0	ENSMUSG00000045679	Pqlc3	PQ loop repeat containing
chr13	107607173	107607912	740	*	358	1.28286	6.06044	7.77987e-08	merged_common	104.103	42.7843	Intron (ENSMUST00000224826.1/ENSMUST00000224826.1, intron 2 of 2)	13	107687397	107692162	4766	1	72257	ENSMUST00000188960.6	-79485	ENSMUSG00000102000	1700006H21Rik	RIKEN cDNA 1700006H21 gene
chr10	121496607	121497188	582	*	213	1.28286	6.06044	7.77987e-08	merged_common	104.103	42.7843	Distal Intergenic	10	121410350	121476347	65998	2	192678	ENSMUST00000026902.8	-20260	ENSMUSG00000025795	Rassf3	Ras association (RalGDS/AF-6) domain family member 3
chr10	13837074	13838258	1185	*	697	1.22565	6.1642	7.81551e-08	merged_common	109.67	46.8954	Intron (ENSMUST00000162610.7/66253, intron 1 of 5)	10	13653588	13844286	190699	2	66253	ENSMUST00000162174.7	6028	ENSMUSG00000019806	Aig1	androgen-induced 1
chr3	9020082	9020796	715	*	315	1.01602	6.68316	7.8199e-08	merged_common	146.136	72.2612	Distal Intergenic	3	8925593	9004723	79131	2	21985	ENSMUST00000120143.7	-15359	ENSMUSG00000027506	Tpd52	tumor protein D52
chr10	111298150	111299017	868	*	433	0.91945	6.96961	8.05223e-08	merged_common	172.366	91.132	Promoter	10	111298679	111301727	3049	1	71769	ENSMUST00000040454.4	0	ENSMUSG00000035759	Bbs10	Bardet-Biedl syndrome 10 (human)
chr17	49428998	49429690	693	*	335	1.48495	5.61441	8.07822e-08	ATAC_KO_PBS_unique	81.9621	29.2818	Promoter	17	49428442	49454790	26349	1	56738	ENSMUST00000174647.1	556	ENSMUSG00000064120	Mocs1	molybdenum cofactor synthesis 1
chr19	46899307	46899847	541	*	215	1.48495	5.61441	8.07822e-08	ATAC_KO_PBS_unique	81.9621	29.2818	Promoter	19	46891509	46898669	7161	2	76952	ENSMUST00000174731.1	-638	ENSMUSG00000025041	Nt5c2	5'-nucleotidase, cytosolic II
chr7	99669220	99669879	660	*	87	-1.5074	5.59769	8.07822e-08	merged_common	28.7201	81.6505	Intron (ENSMUST00000032985.10/101488, intron 8 of 13)	7	99659857	99664932	5076	2	101488	ENSMUST00000154295.1	-4288	ENSMUSG00000030737	Slco2b1	solute carrier organic anion transporter family, member 2b1
chr4	9682603	9682835	233	*	116	2.0054	4.79248	8.18461e-08	ATAC_KO_PBS_unique	55.5294	13.8305	Distal Intergenic	4	9449079	9669344	220266	2	65973	ENSMUST00000108339.7	-13259	ENSMUSG00000028207	Asph	aspartate-beta-hydroxylase
chr10	111672907	111673047	141	*	71	2.0054	4.79248	8.18461e-08	ATAC_KO_PBS_unique	55.5294	13.8305	Distal Intergenic	10	111586719	111594273	7555	2	71321	ENSMUST00000181547.1	-78634	ENSMUSG00000097082	4933440J02Rik	RIKEN cDNA 4933440J02 gene
chr17	44053475	44053797	323	*	125	2.0054	4.79248	8.18461e-08	ATAC_KO_PBS_unique	55.5294	13.8305	Distal Intergenic	17	44078813	44086567	7755	1	83965	ENSMUST00000154166.7	-25016	ENSMUSG00000023960	Enpp5	ectonucleotide pyrophosphatase/phosphodiesterase 5
chr11	17953356	17954104	749	*	568	0.8827	7.08473	8.26246e-08	merged_common	184.321	99.967	Promoter	11	17953970	17959578	5609	1	102633673	ENSMUST00000140161.1	0	ENSMUSG00000086468	Etaa1os	Ewing tumor-associated antigen 1, opposite strand
chr2	154732753	154733048	296	*	129	2.51395	4.21103	8.35485e-08	ATAC_KO_PBS_unique	44.2623	7.74924	Intron (ENSMUST00000155334.1/ENSMUST00000155334.1, intron 2 of 2)	2	154691070	154694281	3212	1	75608	ENSMUST00000136788.1	41683	ENSMUSG00000038467	Chmp4b	charged multivesicular body protein 4B
chr19	21179906	21180169	264	*	144	2.51395	4.21103	8.35485e-08	ATAC_KO_PBS_unique	44.2623	7.74924	Distal Intergenic	19	21272278	21282289	10012	1	22682	ENSMUST00000025659.10	-92109	ENSMUSG00000024750	Zfand5	zinc finger, AN1-type domain 5
chr2	84936398	84936919	522	*	217	1.789	5.13339	8.53905e-08	ATAC_KO_PBS_unique	65.2493	18.8814	Promoter	2	84936579	84937834	1256	1	58207	ENSMUST00000130278.1	0	ENSMUSG00000027074	Slc43a3	solute carrier family 43, member 3
chr15	40953563	40954191	629	*	293	1.789	5.13339	8.53905e-08	ATAC_KO_PBS_unique	65.2493	18.8814	Intron (ENSMUST00000053467.5/22762, intron 4 of 7)	15	41173487	41173868	382	1	100418302	ENSMUST00000060066.5	-219296	NA	4930555K19Rik	leucine rich repeat and sterile alpha motif containing 1 pseudogene
chr1	173741706	173742111	406	*	57	2.10225	4.70681	8.59629e-08	ATAC_KO_PBS_unique	54.1142	12.6029	Promoter	1	173723427	173741747	18321	2	226691	ENSMUST00000042610.14	0	ENSMUSG00000073490	Ifi207	interferon activated gene 207
chr7	68682572	68682820	249	*	84	2.10225	4.70681	8.59629e-08	ATAC_KO_PBS_unique	54.1142	12.6029	Distal Intergenic	7	68618838	68619557	720	1	384639	ENSMUST00000187472.1	63734	NA	Gm5334	tetraspanin 7 pseudogene
chr10	96686100	96686429	330	*	221	2.10225	4.70681	8.59629e-08	ATAC_KO_PBS_unique	54.1142	12.6029	Distal Intergenic	10	96617554	96618668	1115	1	12226	ENSMUST00000218953.1	68546	ENSMUSG00000036478	Btg1	B cell translocation gene 1, anti-proliferative
chr5	16466490	16467490	1001	*	824	1.4711	5.67215	8.81584e-08	ATAC_KO_PBS_unique	84.9004	30.6242	Distal Intergenic	5	16553495	16573434	19940	1	15234	ENSMUST00000195957.4	-86005	ENSMUSG00000028864	Hgf	hepatocyte growth factor
chr2	148521997	148522622	626	*	338	1.4711	5.67215	8.81584e-08	merged_common	84.9004	30.6242	Distal Intergenic	2	148436640	148443563	6924	2	17064	ENSMUST00000099269.3	-78434	ENSMUSG00000027435	Cd93	CD93 antigen
chr10	43667736	43668381	646	*	434	1.4711	5.67215	8.81584e-08	merged_common	84.9004	30.6242	Intron (ENSMUST00000215599.1/414125, intron 3 of 4)	10	43623747	43630806	7060	1	414125	ENSMUST00000216735.1	43989	ENSMUSG00000075184	F930017D23Rik	RIKEN cDNA F930017D23 gene
chr7	3505984	3506271	288	*	97	2.35399	4.33621	8.82406e-08	ATAC_KO_PBS_unique	45.6709	8.93343	Distal Intergenic	7	3488570	3502624	14055	2	245126	ENSMUST00000203821.2	-3360	ENSMUSG00000053338	Tarm1	T cell-interacting, activating receptor on myeloid cells 1
chr19	42176972	42177290	319	*	74	2.35399	4.33621	8.82406e-08	ATAC_KO_PBS_unique	45.6709	8.93343	Intron (ENSMUST00000164455.1/319740, intron 2 of 2)	19	42178823	42184159	5337	1	319740	ENSMUST00000168130.1	-1533	ENSMUSG00000018820	Zfyve27	zinc finger, FYVE domain containing 27
chr2	80524140	80524861	722	*	364	0.96808	6.82249	8.92908e-08	merged_common	158.301	80.9214	Promoter	2	80506891	80525680	18790	2	50884	ENSMUST00000154793.1	819	ENSMUSG00000027002	Nckap1	NCK-associated protein 1
chr1	173912878	173913096	219	*	103	2.24131	4.46241	9.0517e-08	ATAC_KO_PBS_unique	47.9369	10.1384	Promoter	1	173896345	173913046	16702	2	381308	ENSMUST00000009340.9	0	ENSMUSG00000026536	Ifi211	interferon activated gene 211
chr3	9500746	9501003	258	*	135	2.24131	4.46241	9.0517e-08	ATAC_KO_PBS_unique	47.9369	10.1384	Intron (ENSMUST00000041124.12/170753, intron 2 of 8)	3	9438696	9441036	2341	2	170753	ENSMUST00000192832.1	-59710	ENSMUSG00000040209	Zfp704	zinc finger protein 704
chr14	17414282	17414932	651	*	385	1.30776	5.9771	9.06012e-08	merged_common	99.1115	40.0358	Distal Intergenic	14	17660261	17963125	302865	1	21834	ENSMUST00000224470.1	-245329	ENSMUSG00000021779	Thrb	thyroid hormone receptor beta
chr11	93821527	93822227	701	*	215	1.24673	6.08684	9.28364e-08	merged_common	104.706	44.1235	Distal Intergenic	11	93875383	93876143	761	2	217109	ENSMUST00000134807.1	53916	ENSMUSG00000054079	Utp18	UTP18 small subunit processome component
chr9	85342838	85343674	837	*	262	1.51294	5.56174	9.3532e-08	ATAC_KO_PBS_unique	79.7941	27.9596	Exon (ENSMUST00000192504.1/ENSMUST00000192504.1, exon 1 of 1)	9	85320439	85327348	6910	2	212943	ENSMUST00000187711.1	-15490	ENSMUSG00000032265	Tent5a	terminal nucleotidyltransferase 5A
chr6	86266428	86267231	804	*	575	1.83981	5.05817	9.44442e-08	ATAC_KO_PBS_unique	63.0347	17.6093	Intron (ENSMUST00000032066.12/21802, intron 3 of 5)	6	86211594	86272219	60626	1	21802	ENSMUST00000194449.2	54834	ENSMUSG00000029999	Tgfa	transforming growth factor alpha
chr14	44988036	44988729	694	*	127	1.83981	5.05817	9.44442e-08	ATAC_KO_PBS_unique	63.0347	17.6093	Promoter	14	44988195	45003820	15626	1	19217	ENSMUST00000046891.5	0	ENSMUSG00000037759	Ptger2	prostaglandin E receptor 2 (subtype EP2)
chr4	63151067	63151959	893	*	349	1.40995	5.76154	9.45215e-08	ATAC_KO_PBS_unique	88.4331	33.2796	Exon (ENSMUST00000030041.4/11699, exon 3 of 10)	4	63143275	63154173	10899	2	11699	ENSMUST00000030041.4	2214	ENSMUSG00000028356	Ambp	alpha 1 microglobulin/bikunin precursor
chr5	43185359	43185987	629	*	312	1.40995	5.76154	9.45215e-08	merged_common	88.4331	33.2796	Intron (ENSMUST00000187911.6/665934, intron 3 of 5)	5	43233170	43289724	56555	1	231207	ENSMUST00000169035.7	-47183	ENSMUSG00000039782	Cpeb2	cytoplasmic polyadenylation element binding protein 2
chr3	50628093	50628675	583	*	425	1.56004	5.44209	9.5657e-08	ATAC_KO_PBS_unique	74.6521	25.3176	Exon (ENSMUST00000193881.1/ENSMUST00000193881.1, exon 1 of 1)	3	50415970	50443614	27645	2	26570	ENSMUST00000142932.2	-184479	ENSMUSG00000027737	Slc7a11	solute carrier family 7 (cationic amino acid transporter, y+ system), member 11
chr12	112581125	112581672	548	*	107	1.57439	5.45006	9.5657e-08	ATAC_KO_PBS_unique	75.4399	25.3316	Distal Intergenic	12	112588784	112614957	26174	1	70435	ENSMUST00000101029.3	-7112	ENSMUSG00000037679	Inf2	inverted formin, FH2 and WH2 domain containing
chr1	135132346	135132807	462	*	256	1.56004	5.44209	9.5657e-08	merged_common	74.6521	25.3176	Promoter	1	135108498	135132594	24097	2	13924	ENSMUST00000183317.7	0	ENSMUSG00000097993	Ptprv	protein tyrosine phosphatase, receptor type, V
chr8	84711783	84713121	1339	*	860	-0.96552	6.79231	9.58319e-08	merged_common	79.3166	154.887	Promoter	8	84708634	84714068	5435	2	18032	ENSMUST00000132236.1	947	ENSMUSG00000001911	Nfix	nuclear factor I/X
chr11	55419325	55420124	800	*	587	-1.12359	6.38739	9.7181e-08	merged_common	56.7125	123.57	Promoter	11	55394500	55419898	25399	2	20692	ENSMUST00000108858.7	0	ENSMUSG00000018593	Sparc	secreted acidic cysteine rich glycoprotein
chr4	33497059	33497710	652	*	450	1.12524	6.38616	9.7181e-08	merged_common	123.535	56.6318	Intron (ENSMUST00000108153.8/24018, intron 14 of 15)	4	33438081	33438209	129	1	102465904	ENSMUST00000183962.1	58978	ENSMUSG00000098310	Mir8118	microRNA 8118
chr17	57031076	57032544	1469	*	703	-0.42521	9.0828	9.89367e-08	merged_common	467.945	628.341	Promoter	17	57021051	57031488	10438	2	16549	ENSMUST00000007814.9	0	ENSMUSG00000007670	Khsrp	KH-type splicing regulatory protein
chr5	143579751	143580235	485	*	171	1.39903	5.81377	9.97992e-08	merged_common	91.347	34.6373	Distal Intergenic	5	143549040	143551933	2894	1	67238	ENSMUST00000198994.1	30711	ENSMUSG00000118332	Fam220a	family with sequence similarity 220, member A
chr14	120477108	120479684	2577	*	489	-0.44573	8.93085	1.02445e-07	merged_common	418.181	569.564	Promoter	14	120478444	120507194	28751	1	76108	ENSMUST00000062117.13	0	ENSMUSG00000051615	Rap2a	RAS related protein 2a
chr9	90233037	90234079	1043	*	450	1.33472	5.88863	1.03966e-07	merged_common	94.0913	37.3043	Intron (ENSMUST00000041767.13/67016, intron 3 of 12)	9	90241163	90255927	14765	2	67016	ENSMUST00000144646.2	21848	ENSMUSG00000037410	Tbc1d2b	TBC1 domain family, member 2B
chr1	162005970	162006678	709	*	381	1.33472	5.88863	1.03966e-07	merged_common	94.0913	37.3043	Promoter	1	162005172	162016494	11323	1	72753	ENSMUST00000160555.1	798	ENSMUSG00000090260	2810442N19Rik	RIKEN cDNA 2810442N19 gene
chr14	21499172	21501769	2598	*	1569	-0.41651	9.12674	1.04272e-07	merged_common	483.873	645.823	Promoter	14	21499770	21672071	172302	1	54169	ENSMUST00000182855.7	0	ENSMUSG00000021767	Kat6b	K(lysine) acetyltransferase 6B
chr1	185276873	185277364	492	*	352	1.66785	5.25489	1.05243e-07	ATAC_KO_PBS_unique	68.0638	21.4212	Promoter	1	185277798	185281695	3898	1	98732	ENSMUST00000195534.1	-434	ENSMUSG00000039318	Rab3gap2	RAB3 GTPase activating protein subunit 2
chr11	20107778	20108494	717	*	163	1.66785	5.25489	1.05243e-07	ATAC_KO_PBS_unique	68.0638	21.4212	Intron (ENSMUST00000000137.7/66713, intron 1 of 8)	11	20078686	20112867	34182	2	66713	ENSMUST00000132022.1	4373	ENSMUSG00000020152	Actr2	ARP2 actin-related protein 2
chr13	51946207	51946504	298	*	97	1.66785	5.25489	1.05243e-07	ATAC_KO_PBS_unique	68.0638	21.4212	Distal Intergenic	13	51846744	51848224	1481	1	23882	ENSMUST00000132480.1	99463	ENSMUSG00000021453	Gadd45g	growth arrest and DNA-damage-inducible 45 gamma
chr12	73201620	73202264	645	*	187	1.66785	5.25489	1.05243e-07	merged_common	68.0638	21.4212	Intron (ENSMUST00000187549.6/17420, intron 6 of 6)	12	73123717	73273988	150272	1	17420	ENSMUST00000021523.6	77903	ENSMUSG00000021103	Mnat1	menage a trois 1
chr7	38187776	38190464	2689	*	1856	-0.48979	8.66432	1.0642e-07	merged_common	342.373	480.774	5' UTR	7	38186271	38195266	8996	1	72244	ENSMUST00000179503.2	1505	ENSMUSG00000054676	1600014C10Rik	RIKEN cDNA 1600014C10 gene
chrX	170004837	170005890	1054	*	600	-1.31173	5.95006	1.07036e-07	merged_common	39.2384	97.4051	3' UTR	20	169979451	169990798	11348	1	17318	ENSMUST00000079443.5	25386	ENSMUSG00000035299	Mid1	midline 1
chr1	165161057	165161362	306	*	158	-1.51111	5.5222	1.08097e-07	merged_common	27.2209	77.5876	Promoter	1	165137855	165160773	22919	2	83993	ENSMUST00000027859.11	-284	ENSMUSG00000026572	Tbx19	T-box 19
chr2	74395252	74396019	768	*	437	1.55643	5.51464	1.08097e-07	ATAC_KO_PBS_unique	78.404	26.6567	Distal Intergenic	2	74298940	74307717	8778	2	73962	ENSMUST00000153743.1	-87535	ENSMUSG00000085405	4930441J16Rik	RIKEN cDNA 4930441J16 gene
chr6	134366542	134367206	665	*	260	1.54269	5.50701	1.08097e-07	ATAC_KO_PBS_unique	77.6199	26.6426	Intron (ENSMUST00000203352.1/74064, intron 3 of 8)	6	134396318	134438736	42419	1	66813	ENSMUST00000032321.10	-29112	ENSMUSG00000030200	Bcl2l14	BCL2-like 14 (apoptosis facilitator)
chr8	24420355	24420731	377	*	51	1.54269	5.50701	1.08097e-07	ATAC_KO_PBS_unique	77.6199	26.6426	Distal Intergenic	8	24437180	24438984	1805	2	69068	ENSMUST00000052622.5	18253	ENSMUSG00000056313	Tcim	transcriptional and immune response regulator
chr16	8667212	8668050	839	*	224	1.54269	5.50701	1.08097e-07	ATAC_KO_PBS_unique	77.6199	26.6426	Intron (ENSMUST00000008537.9/52502, intron 1 of 3)	16	8658580	8672155	13576	2	52502	ENSMUST00000008537.9	4105	ENSMUSG00000008393	Carhsp1	calcium regulated heat stable protein 1
chr16	95931408	95932241	834	*	380	1.2797	6.01084	1.09053e-07	merged_common	100.475	41.3837	Distal Intergenic	16	95841886	95929077	87192	2	69776	ENSMUST00000233375.1	-2331	ENSMUSG00000117232	1600002D24Rik	RIKEN cDNA 1600002D24 gene
chr2	10971599	10972551	953	*	643	0.99272	6.72747	1.09851e-07	merged_common	149.482	75.1192	Distal Intergenic	2	11172108	11301222	129115	1	18761	ENSMUST00000028118.8	-199557	ENSMUSG00000026778	Prkcq	protein kinase C, theta
chr6	137386205	137386865	661	*	363	1.42129	5.70734	1.10566e-07	merged_common	85.5079	31.9268	Exon (ENSMUST00000167679.7/19277, exon 7 of 26)	6	137410721	137463233	52513	1	19277	ENSMUST00000167002.3	-23856	ENSMUSG00000030223	Ptpro	protein tyrosine phosphatase, receptor type, O
chr2	59184528	59184812	285	*	147	1.85846	4.95794	1.13159e-07	ATAC_KO_PBS_unique	59.1854	16.3216	Intron (ENSMUST00000168631.7/227937, intron 1 of 20)	2	59200774	59215046	14273	1	227937	ENSMUST00000126749.1	-15962	ENSMUSG00000026991	Pkp4	plakophilin 4
chr6	108570935	108571495	561	*	199	1.85846	4.95794	1.13159e-07	ATAC_KO_PBS_unique	59.1854	16.3216	Distal Intergenic	6	108610333	108613995	3663	2	75394	ENSMUST00000204759.1	42500	ENSMUSG00000087341	0610040F04Rik	RIKEN cDNA 0610040F04 gene
chr12	34431528	34432300	773	*	461	1.85846	4.95794	1.13159e-07	ATAC_KO_PBS_unique	59.1854	16.3216	Exon (ENSMUST00000209902.1/79221, exon 4 of 25)	12	34373827	34437307	63481	2	79221	ENSMUST00000211107.1	5007	ENSMUSG00000004698	Hdac9	histone deacetylase 9
chr17	26571429	26571755	327	*	182	1.85846	4.95794	1.13159e-07	ATAC_KO_PBS_unique	59.1854	16.3216	Intron (ENSMUST00000167662.7/67458, intron 1 of 9)	17	26561545	26655174	93630	1	67458	ENSMUST00000001619.14	9884	ENSMUSG00000001576	Ergic1	endoplasmic reticulum-golgi intermediate compartment (ERGIC) 1
chr8	115555312	115556048	737	*	373	-0.89214	6.9771	1.15532e-07	merged_common	92.4775	171.631	Distal Intergenic	8	115701435	115707794	6360	2	17132	ENSMUST00000109104.1	151746	ENSMUSG00000055435	Maf	avian musculoaponeurotic fibrosarcoma oncogene homolog
chr8	77610320	77611089	770	*	378	0.87874	7.0162	1.16378e-07	merged_common	175.53	95.4604	Promoter	8	77595982	77610653	14672	2	234463	ENSMUST00000034030.14	0	ENSMUSG00000031617	Tmem184c	transmembrane protein 184C
chr7	127008681	127009071	391	*	214	1.70955	5.18643	1.18221e-07	ATAC_KO_PBS_unique	65.8543	20.1353	Intron (ENSMUST00000165096.8/78388, intron 1 of 14)	7	126998542	127011865	13324	2	78388	ENSMUST00000133172.1	2794	ENSMUSG00000030681	Mvp	major vault protein
chr19	10943800	10944416	617	*	287	1.70955	5.18643	1.18221e-07	ATAC_KO_PBS_unique	65.8543	20.1353	Intron (ENSMUST00000133836.1/108673, intron 2 of 3)	19	10941481	10947332	5852	2	108673	ENSMUST00000133836.1	2916	ENSMUSG00000024732	Ccdc86	coiled-coil domain containing 86
chr7	16974044	16974541	498	*	210	1.4719	5.60716	1.19354e-07	ATAC_KO_PBS_unique	81.1832	29.2671	Distal Intergenic	7	16959679	16964607	4929	1	71691	ENSMUST00000038163.7	14365	ENSMUSG00000041141	Pnmal1	PNMA-like 1
chr18	73541639	73542514	876	*	341	1.1406	6.32012	1.1984e-07	merged_common	118.638	53.8107	Distal Intergenic	18	73573044	73592575	19532	1	240396	ENSMUST00000091852.4	-30530	ENSMUSG00000037253	Mex3c	mex3 RNA binding family member C
chr1	131431612	131431711	100	*	57	-1.33876	5.85065	1.22459e-07	ATAC_KO_PBS_unique	36.2842	91.775	Intron (ENSMUST00000097588.8/14270, intron 3 of 22)	1	131296641	131364064	67424	2	14270	ENSMUST00000185596.1	-67548	ENSMUSG00000026425	Srgap2	SLIT-ROBO Rho GTPase activating protein 2
chr1	64374531	64375351	821	*	395	1.14421	6.2835	1.23348e-07	merged_common	115.809	52.3964	Distal Intergenic	1	64532645	64597695	65051	1	12912	ENSMUST00000185594.6	-157294	ENSMUSG00000025958	Creb1	cAMP responsive element binding protein 1
chr18	44607518	44608605	1088	*	680	1.03022	6.57002	1.25056e-07	merged_common	135.78	66.4828	Intron (ENSMUST00000089874.8/328949, intron 3 of 18)	18	44661665	44676271	14607	1	626275	ENSMUST00000181094.1	-53060	ENSMUSG00000097610	A930012L18Rik	RIKEN cDNA A930012L18 gene
chr1	26686848	26688357	1510	*	470	-0.90973	6.94209	1.25366e-07	merged_common	89.7117	168.541	Promoter	1	26681814	26687460	5647	2	210940	ENSMUST00000097801.3	0	ENSMUSG00000073722	4931408C20Rik	RIKEN cDNA 4931408C20 gene
chr11	83649184	83649897	714	*	437	1.188	6.22766	1.26315e-07	merged_common	113.116	49.6479	Promoter	11	83647844	83649355	1512	2	20302	ENSMUST00000001008.5	0	ENSMUSG00000000982	Ccl3	chemokine (C-C motif) ligand 3
chr4	95849531	95850681	1151	*	1018	1.28664	5.96537	1.29058e-07	merged_common	97.5919	40.0034	Promoter	4	95849625	95926934	77310	1	75578	ENSMUST00000142384.1	0	ENSMUSG00000028573	Fggy	FGGY carbohydrate kinase domain containing
chr10	83301563	83302088	526	*	272	1.45856	5.66518	1.29198e-07	ATAC_KO_PBS_unique	84.1248	30.6093	Intron (ENSMUST00000039956.5/338365, intron 4 of 10)	10	83301016	83304375	3360	2	338365	ENSMUST00000139329.1	2287	ENSMUSG00000034591	Slc41a2	solute carrier family 41, member 2
chr15	27616184	27616523	340	*	181	1.45856	5.66518	1.29198e-07	merged_common	84.1248	30.6093	3' UTR	15	27542635	27608861	66227	2	432940	ENSMUST00000228179.1	-7323	ENSMUSG00000046034	Otulin	OTU deubiquitinase with linear linkage specificity
chr7	63930193	63930432	240	*	166	2.64799	4.03841	1.30792e-07	ATAC_KO_PBS_unique	41.1382	6.56327	Intron (ENSMUST00000063694.9/50794, intron 1 of 1)	7	63891400	63924870	33471	2	50794	ENSMUST00000183817.1	-5323	ENSMUSG00000052040	Klf13	Kruppel-like factor 13
chr9	63850334	63850600	267	*	192	2.64799	4.03841	1.30792e-07	ATAC_KO_PBS_unique	41.1382	6.56327	Distal Intergenic	9	63646767	63757994	111228	2	17127	ENSMUST00000034973.9	-92340	ENSMUSG00000032402	Smad3	SMAD family member 3
chr5	23114095	23114496	402	*	302	1.98495	4.78112	1.30954e-07	ATAC_KO_PBS_unique	54.7048	13.8196	Intron (ENSMUST00000197992.1/269629, intron 2 of 3)	5	23100552	23275588	175037	1	269629	ENSMUST00000196406.1	13543	ENSMUSG00000106379	Lhfpl3	lipoma HMGIC fusion partner-like 3
chr18	50096517	50096940	424	*	344	1.98495	4.78112	1.30954e-07	ATAC_KO_PBS_unique	54.7048	13.8196	Intron (ENSMUST00000153545.1/106869, intron 1 of 3)	18	50128201	50196269	68069	1	15488	ENSMUST00000025385.6	-31261	ENSMUSG00000024507	Hsd17b4	hydroxysteroid (17-beta) dehydrogenase 4
chr12	106658072	106658955	884	*	338	0.99417	6.69991	1.31068e-07	merged_common	146.727	73.6608	Distal Intergenic	12	106695716	106716324	20609	2	71033	ENSMUST00000124363.7	57369	ENSMUSG00000085820	4933406K04Rik	RIKEN cDNA 4933406K04 gene
chr2	132595782	132596359	578	*	133	1.75483	5.11441	1.32152e-07	ATAC_KO_PBS_unique	63.6384	18.8566	Distal Intergenic	2	132598195	132650156	51962	1	767814	ENSMUST00000143964.7	-1836	ENSMUSG00000074783	AU019990	expressed sequence AU019990
chr5	113918660	113919169	510	*	166	1.75483	5.11441	1.32152e-07	ATAC_KO_PBS_unique	63.6384	18.8566	Distal Intergenic	5	113842436	113908758	66323	2	23790	ENSMUST00000004646.12	-9902	ENSMUSG00000004530	Coro1c	coronin, actin binding protein 1C
chr9	99563570	99564027	458	*	301	1.75483	5.11441	1.32152e-07	ATAC_KO_PBS_unique	63.6384	18.8566	Intron (ENSMUST00000035043.11/74125, intron 1 of 21)	9	99518804	99568649	49846	2	74125	ENSMUST00000185524.6	4622	ENSMUSG00000032468	Armc8	armadillo repeat containing 8
chrX	48623395	48624017	623	*	320	1.77203	5.12396	1.32152e-07	ATAC_KO_PBS_unique	64.444	18.869	Promoter	20	48623413	48631036	7624	1	20523	ENSMUST00000128773.7	0	ENSMUSG00000031105	Slc25a14	solute carrier family 25 (mitochondrial carrier, brain), member 14
chr7	99661083	99661503	421	*	116	-1.71028	5.13922	1.32152e-07	ATAC_Control_PBS_unique	19.4821	63.7503	Exon (ENSMUST00000131160.2/ENSMUST00000131160.2, exon 2 of 3)	7	99659857	99664932	5076	2	101488	ENSMUST00000154295.1	3429	ENSMUSG00000030737	Slco2b1	solute carrier organic anion transporter family, member 2b1
chr16	78575795	78577779	1985	*	959	0.66628	7.80482	1.35041e-07	merged_common	281.689	177.501	Promoter	16	78540338	78576634	36297	2	67102	ENSMUST00000231973.1	0	ENSMUSG00000022864	D16Ertd472e	DNA segment, Chr 16, ERATO Doi 472, expressed
chr18	41950795	41951706	912	*	537	0.91522	6.9194	1.35907e-07	merged_common	166.227	88.144	Promoter	18	41875696	41951194	75499	2	77619	ENSMUST00000070949.4	0	ENSMUSG00000056671	Prelid2	PRELI domain containing 2
chr1	179045916	179046658	743	*	217	2.08114	4.69508	1.38567e-07	ATAC_KO_PBS_unique	53.2847	12.5927	Intron (ENSMUST00000128302.7/69726, intron 9 of 11)	1	178957250	178989345	32096	2	69726	ENSMUST00000129393.1	-56571	ENSMUSG00000055067	Smyd3	SET and MYND domain containing 3
chrX	164836517	164836988	472	*	80	2.08114	4.69508	1.38567e-07	ATAC_KO_PBS_unique	53.2847	12.5927	Distal Intergenic	20	164936318	164980297	43980	2	76763	ENSMUST00000112247.8	143309	ENSMUSG00000061778	Mospd2	motile sperm domain containing 2
chr6	86004362	86004570	209	*	93	2.48717	4.19616	1.4139e-07	ATAC_KO_PBS_unique	43.4037	7.7413	Promoter	6	86004380	86009355	4976	1	75355	ENSMUST00000201164.1	0	ENSMUSG00000106791	4930553P18Rik	RIKEN cDNA 4930553P18 gene
chr7	127296053	127296380	328	*	96	2.45983	4.18097	1.4139e-07	ATAC_KO_PBS_unique	42.544	7.73314	Promoter	7	127296260	127335137	38878	1	16408	ENSMUST00000117762.7	0	ENSMUSG00000030830	Itgal	integrin alpha L
chr17	64820895	64821172	278	*	196	2.45983	4.18097	1.4139e-07	ATAC_KO_PBS_unique	42.544	7.73314	Distal Intergenic	17	64832523	64836071	3549	2	78057	ENSMUST00000024896.3	14899	ENSMUSG00000024088	4930583I09Rik	RIKEN cDNA 4930583I09 gene
chrX	140513450	140513731	282	*	209	2.45983	4.18097	1.4139e-07	ATAC_KO_PBS_unique	42.544	7.73314	Distal Intergenic	20	140539528	140542668	3141	2	14605	ENSMUST00000112995.2	28937	ENSMUSG00000031431	Tsc22d3	TSC22 domain family, member 3
chr4	141573450	141573975	526	*	370	1.54553	5.43403	1.43485e-07	ATAC_KO_PBS_unique	73.8638	25.3035	Downstream (2-3kb)	4	141590050	141596469	6420	2	74202	ENSMUST00000137491.1	22494	ENSMUSG00000006219	Fblim1	filamin binding LIM protein 1
chr3	67557054	67557619	566	*	351	1.54553	5.43403	1.43485e-07	merged_common	73.8638	25.3035	Distal Intergenic	3	67582741	67604237	21497	1	66868	ENSMUST00000029344.9	-25122	ENSMUSG00000027775	Mfsd1	major facilitator superfamily domain containing 1
chr15	55379918	55380335	418	*	273	1.37585	5.80089	1.44154e-07	merged_common	89.8107	34.6063	Intron (ENSMUST00000023053.11/ENSMUST00000023053.11, intron 10 of 47)	15	55448826	55519689	70864	1	12818	ENSMUST00000125416.1	-68491	ENSMUSG00000022371	Col14a1	collagen, type XIV, alpha 1
chr9	75077190	75077494	305	*	120	2.32828	4.32193	1.47602e-07	ATAC_KO_PBS_unique	44.82	8.92462	Intron (ENSMUST00000149823.1/17918, intron 1 of 1)	9	75071600	75218953	147354	1	17918	ENSMUST00000136731.7	5590	ENSMUSG00000034593	Myo5a	myosin VA
chr4	48042622	48043924	1303	*	582	0.65467	7.84886	1.48041e-07	merged_common	289.254	183.74	Distal Intergenic	4	48045153	48086445	41293	1	18124	ENSMUST00000030025.9	-1229	ENSMUSG00000028341	Nr4a3	nuclear receptor subfamily 4, group A, member 3
chr2	11712859	11713262	404	*	151	2.09794	4.55164	1.48622e-07	ATAC_KO_PBS_unique	48.5234	11.3347	Intron (ENSMUST00000138349.7/16169, intron 1 of 6)	2	11718327	11720286	1960	1	16169	ENSMUST00000133975.1	-5065	ENSMUSG00000023206	Il15ra	interleukin 15 receptor, alpha chain
chr3	65352835	65352984	150	*	73	2.12133	4.56464	1.48622e-07	ATAC_KO_PBS_unique	49.3612	11.3449	Promoter	3	65353767	65358820	5054	1	16497	ENSMUST00000161956.1	-783	ENSMUSG00000027827	Kcnab1	potassium voltage-gated channel, shaker-related subfamily, beta member 1
chr7	80754110	80754365	256	*	170	2.09794	4.55164	1.48622e-07	ATAC_KO_PBS_unique	48.5234	11.3347	Intron (ENSMUST00000206896.1/ENSMUST00000206896.1, intron 1 of 2)	7	80726779	80730248	3470	2	29875	ENSMUST00000205606.1	-23862	ENSMUSG00000030536	Iqgap1	IQ motif containing GTPase activating protein 1
chr7	133186389	133186626	238	*	75	2.09794	4.55164	1.48622e-07	ATAC_KO_PBS_unique	48.5234	11.3347	Distal Intergenic	7	133128251	133142457	14207	1	74970	ENSMUST00000209850.1	58138	ENSMUSG00000109816	4930483O08Rik	RIKEN cDNA 4930483O08 gene
chr12	99956426	99956813	388	*	216	2.12133	4.56464	1.48622e-07	ATAC_KO_PBS_unique	49.3612	11.3449	Distal Intergenic	12	99964499	100062682	98184	1	217826	ENSMUST00000160413.7	-7686	ENSMUSG00000045404	Kcnk13	potassium channel, subfamily K, member 13
chr13	33077054	33077313	260	*	182	2.12133	4.56464	1.48622e-07	ATAC_KO_PBS_unique	49.3612	11.3449	Distal Intergenic	13	33078575	33085298	6724	1	282663	ENSMUST00000222973.1	-1262	ENSMUSG00000051029	Serpinb1b	serine (or cysteine) peptidase inhibitor, clade B, member 1b
chr11	58009614	58010742	1129	*	725	1.31233	5.87619	1.49203e-07	merged_common	92.5624	37.2721	Promoter	11	58009064	58062034	52971	1	73158	ENSMUST00000178636.1	550	ENSMUSG00000037331	Larp1	La ribonucleoprotein domain family, member 1
chr13	58996481	58996729	249	*	171	2.21703	4.44892	1.49821e-07	ATAC_KO_PBS_unique	47.0928	10.1289	Intron (ENSMUST00000225488.1/18212, intron 13 of 17)	13	58871735	58986149	114415	1	18212	ENSMUST00000223636.1	124746	ENSMUSG00000055254	Ntrk2	neurotrophic tyrosine kinase, receptor, type 2
chr9	120045264	120049013	3750	*	1475	-1.0885	6.40689	1.52474e-07	merged_common	58.1876	123.738	3' UTR	9	119901616	120068283	166668	2	13051	ENSMUST00000177637.1	19270	ENSMUSG00000052336	Cx3cr1	chemokine (C-X3-C motif) receptor 1
chr9	120118019	120118696	678	*	381	1.31556	5.93054	1.52684e-07	merged_common	96.2237	38.6597	Intron (ENSMUST00000035106.11/208638, intron 3 of 6)	9	120114989	120120280	5292	1	208638	ENSMUST00000154969.1	3030	ENSMUSG00000032519	Slc25a38	solute carrier family 25, member 38
chr5	124350880	124351652	773	*	451	-1.18513	6.15814	1.53043e-07	merged_common	47.3593	107.687	Promoter	5	124345605	124351654	6050	2	13445	ENSMUST00000111474.7	2	ENSMUSG00000029394	Cdk2ap1	CDK2 (cyclin-dependent kinase 2)-associated protein 1
chr7	25246378	25247449	1072	*	291	-1.18513	6.15814	1.53043e-07	merged_common	47.3593	107.687	Intron (ENSMUST00000045847.14/13875, intron 1 of 3)	7	25245447	25250730	5284	2	13875	ENSMUST00000116343.2	3281	ENSMUSG00000040857	Erf	Ets2 repressor factor
chr10	57727474	57728280	807	*	438	0.78336	7.3433	1.5398e-07	merged_common	213.04	123.779	Promoter	10	57727981	57736441	8461	1	18768	ENSMUST00000176354.1	0	ENSMUSG00000019876	Pkib	protein kinase inhibitor beta, cAMP dependent, testis specific
chr17	30004010	30005821	1812	*	734	-0.69147	7.67896	1.5774e-07	merged_common	161.258	260.42	Promoter	17	30004733	30210022	205290	1	21769	ENSMUST00000226208.2	0	ENSMUSG00000044477	Zfand3	zinc finger, AN1-type domain 3
chr1	74773126	74773433	308	*	181	1.65172	5.24593	1.6082e-07	ATAC_KO_PBS_unique	67.2653	21.4079	Intron (ENSMUST00000006716.7/22420, intron 1 of 3)	1	74771892	74785322	13431	1	22420	ENSMUST00000006716.7	1234	ENSMUSG00000033227	Wnt6	wingless-type MMTV integration site family, member 6
chr5	77292722	77293394	673	*	264	1.40886	5.70044	1.61165e-07	merged_common	84.734	31.9116	Downstream (<1kb)	5	77303379	77304315	937	2	56412	ENSMUST00000150451.1	10921	ENSMUSG00000036285	Noa1	nitric oxide associated 1
chr5	139298875	139299478	604	*	410	1.59345	5.38244	1.64725e-07	ATAC_KO_PBS_unique	72.4626	24.0125	Intron (ENSMUST00000151450.7/231821, intron 3 of 10)	5	139272776	139303150	30375	2	231821	ENSMUST00000196271.4	3672	ENSMUSG00000056413	Adap1	ArfGAP with dual PH domains 1
chr17	81536013	81536516	504	*	259	1.59345	5.38244	1.64725e-07	ATAC_KO_PBS_unique	72.4626	24.0125	Intron (ENSMUST00000234131.1/20541, intron 1 of 7)	17	81388691	81649607	260917	2	20541	ENSMUST00000086538.9	113091	ENSMUSG00000054640	Slc8a1	solute carrier family 8 (sodium/calcium exchanger), member 1
chr18	53267356	53268063	708	*	508	1.07652	6.46481	1.65872e-07	merged_common	128.273	60.8232	Intron (ENSMUST00000165032.7/69226, intron 1 of 6)	18	53245769	53390823	145055	1	69226	ENSMUST00000025417.8	21587	ENSMUSG00000024535	Snx24	sorting nexing 24
chr5	43799639	43799814	176	*	93	2.7515	3.80367	1.70393e-07	ATAC_KO_PBS_unique	36.2377	5.38117	Intron (ENSMUST00000114047.9/242960, intron 1 of 10)	5	43744616	43782150	37535	2	242960	ENSMUST00000047857.15	-17489	ENSMUSG00000039753	Fbxl5	F-box and leucine-rich repeat protein 5
chr19	29486529	29487066	538	*	142	0.98743	6.69616	1.74363e-07	merged_common	146.005	73.6414	Exon (ENSMUST00000181726.1/77779, exon 5 of 5)	19	29503663	29521989	18327	2	77779	ENSMUST00000180737.1	34923	ENSMUSG00000097855	A930007I19Rik	RIKEN cDNA A930007I19 gene
chr5	113791333	113793636	2304	*	1507	-1.15637	6.22972	1.75136e-07	merged_common	50.2668	112.043	Downstream (<1kb)	5	113795638	113800446	4809	2	231633	ENSMUST00000160374.1	6810	ENSMUSG00000054675	Tmem119	transmembrane protein 119
chr13	73489636	73490799	1164	*	473	0.84022	7.14551	1.75162e-07	merged_common	189.443	105.815	Intron (ENSMUST00000022099.14/210992, intron 3 of 13)	13	73471751	73515125	43375	1	210992	ENSMUST00000223060.1	17885	ENSMUSG00000021608	Lpcat1	lysophosphatidylcholine acyltransferase 1
chr10	71348946	71349614	669	*	309	1.45872	5.59984	1.75776e-07	ATAC_KO_PBS_unique	80.4043	29.2523	Intron (ENSMUST00000079252.12/69718, intron 1 of 5)	10	71347843	71363880	16038	1	69718	ENSMUST00000141153.1	1103	ENSMUSG00000060733	Ipmk	inositol polyphosphate multikinase
chr1	43521058	43521355	298	*	129	1.45872	5.59984	1.75776e-07	merged_common	80.4043	29.2523	Intron (ENSMUST00000187435.6/17974, intron 2 of 2)	1	43532405	43554062	21658	1	17974	ENSMUST00000202540.1	-11050	ENSMUSG00000066877	Nck2	non-catalytic region of tyrosine kinase adaptor protein 2
chr13	55447526	55448043	518	*	324	1.34335	5.83908	1.76035e-07	merged_common	91.1869	35.9372	Intron (ENSMUST00000224653.1/26385, intron 1 of 15)	13	55445461	55460055	14595	1	26385	ENSMUST00000224118.1	2065	ENSMUSG00000074886	Grk6	G protein-coupled receptor kinase 6
chr4	62728863	62729123	261	*	163	1.82026	4.93672	1.78037e-07	ATAC_KO_PBS_unique	57.5542	16.2976	Distal Intergenic	4	62700695	62704001	3307	1	50780	ENSMUST00000153875.2	28168	ENSMUSG00000059810	Rgs3	regulator of G-protein signaling 3
chr7	80779334	80779771	438	*	125	1.8395	4.94741	1.78037e-07	ATAC_KO_PBS_unique	58.3702	16.3097	Intron (ENSMUST00000167377.2/29875, intron 2 of 37)	7	80749377	80803263	53887	2	29875	ENSMUST00000206149.1	23492	ENSMUSG00000030536	Iqgap1	IQ motif containing GTPase activating protein 1
chr8	36164838	36165566	729	*	310	1.8395	4.94741	1.78037e-07	ATAC_KO_PBS_unique	58.3702	16.3097	Distal Intergenic	8	36159479	36161588	2110	1	330738	ENSMUST00000211253.1	5359	ENSMUSG00000109704	Gm38414	predicted gene, 38414
chr11	23217350	23217898	549	*	268	1.8395	4.94741	1.78037e-07	ATAC_KO_PBS_unique	58.3702	16.3097	Distal Intergenic	11	23256041	23297597	41557	1	103573	ENSMUST00000020538.12	-38143	ENSMUSG00000020290	Xpo1	exportin 1
chr11	68513995	68514321	327	*	209	1.8395	4.94741	1.78037e-07	ATAC_KO_PBS_unique	58.3702	16.3097	Intron (ENSMUST00000060441.6/104709, intron 1 of 19)	11	68503091	68552698	49608	1	104709	ENSMUST00000153671.7	10904	ENSMUSG00000046207	Pik3r6	phosphoinositide-3-kinase regulatory subunit 5
chr5	109558633	109559466	834	*	334	1.6928	5.17712	1.81455e-07	ATAC_KO_PBS_unique	65.0519	20.1223	Promoter	5	109554709	109558936	4228	2	57914	ENSMUST00000200284.4	0	ENSMUSG00000033467	Crlf2	cytokine receptor-like factor 2
chr5	113672461	113672924	464	*	158	1.6928	5.17712	1.81455e-07	ATAC_KO_PBS_unique	65.0519	20.1223	Distal Intergenic	5	113612354	113650426	38073	2	14747	ENSMUST00000047936.12	-22035	ENSMUSG00000042190	Cmklr1	chemokine-like receptor 1
chr8	61517642	61518155	514	*	334	1.6928	5.17712	1.81455e-07	ATAC_KO_PBS_unique	65.0519	20.1223	Intron (ENSMUST00000121200.8/72333, intron 8 of 11)	8	61514925	61515900	976	2	72333	ENSMUST00000153495.1	-1742	ENSMUSG00000058056	Palld	palladin, cytoskeletal associated protein
chr13	113755869	113756093	225	*	140	1.6928	5.17712	1.81455e-07	ATAC_KO_PBS_unique	65.0519	20.1223	Distal Intergenic	13	113794505	114157461	362957	1	218639	ENSMUST00000091201.6	-38412	ENSMUSG00000042348	Arl15	ADP-ribosylation factor-like 15
chr14	58323145	58323796	652	*	199	1.6928	5.17712	1.81455e-07	ATAC_KO_PBS_unique	65.0519	20.1223	Intron (ENSMUST00000225434.1/ENSMUST00000225434.1, intron 2 of 2)	14	58076507	58109392	32886	1	14180	ENSMUST00000166770.1	246638	ENSMUSG00000021974	Fgf9	fibroblast growth factor 9
chr16	46009836	46011370	1535	*	645	0.66269	7.78995	1.83836e-07	merged_common	278.454	175.899	Promoter	16	45959263	46010218	50956	2	433022	ENSMUST00000130481.1	0	ENSMUSG00000087141	Plcxd2	phosphatidylinositol-specific phospholipase C, X domain containing 2
chr5	122070956	122071649	694	*	364	-1.24109	6.06946	1.83888e-07	merged_common	43.6804	103.251	Distal Intergenic	5	121884754	122050102	165349	2	13048	ENSMUST00000154139.7	-20854	ENSMUSG00000042589	Cux2	cut-like homeobox 2
chr12	111672044	111672629	586	*	302	-1.2177	6.08245	1.83888e-07	merged_common	44.4342	103.343	Promoter	12	111669361	111672282	2922	2	12709	ENSMUST00000222705.1	0	ENSMUSG00000001270	Ckb	creatine kinase, brain
chr8	70538153	70540072	1920	*	909	-0.53591	8.34142	1.87603e-07	merged_common	269.374	390.553	Promoter	8	70539457	70581641	42185	1	13716	ENSMUST00000210155.1	0	ENSMUSG00000070002	Ell	elongation factor RNA polymerase II
chr10	120163393	120163858	466	*	343	1.62928	5.32012	1.88594e-07	ATAC_KO_PBS_unique	70.2662	22.7135	Intron (ENSMUST00000020448.10/73914, intron 8 of 11)	10	120160142	120170378	10237	2	73914	ENSMUST00000140237.7	6520	ENSMUSG00000020227	Irak3	interleukin-1 receptor-associated kinase 3
chr11	75416118	75416612	495	*	412	-1.42413	5.6677	1.88741e-07	ATAC_Control_PBS_unique	31.0309	83.2723	Promoter	11	75410221	75415730	5510	2	20317	ENSMUST00000167281.7	-388	ENSMUSG00000000753	Serpinf1	serine (or cysteine) peptidase inhibitor, clade F, member 1
chr11	75211758	75212793	1036	*	633	-1.10928	6.34445	1.89566e-07	merged_common	55.3231	119.353	Intron (ENSMUST00000102514.3/237847, intron 1 of 1)	11	75193783	75267769	73987	1	237847	ENSMUST00000102514.3	17975	ENSMUSG00000045287	Rtn4rl1	reticulon 4 receptor-like 1
chr9	57233694	57234111	418	*	286	1.89851	4.8614	1.93703e-07	ATAC_KO_PBS_unique	56.1282	15.0547	Distal Intergenic	9	57236556	57249864	13309	1	541610	ENSMUST00000093837.4	-2445	ENSMUSG00000070298	Trcg1	taste receptor cell gene 1
chr16	8785183	8785268	86	*	22	1.89851	4.8614	1.93703e-07	ATAC_KO_PBS_unique	56.1282	15.0547	Intron (ENSMUST00000160405.7/252870, intron 1 of 31)	16	8689595	8792308	102714	2	252870	ENSMUST00000160405.7	7040	ENSMUSG00000022710	Usp7	ubiquitin specific peptidase 7
chr18	11046087	11046559	473	*	204	1.89851	4.8614	1.93703e-07	ATAC_KO_PBS_unique	56.1282	15.0547	Intron (ENSMUST00000232314.1/68434, intron 1 of 3)	18	10987944	11047637	59694	2	68434	ENSMUST00000232314.1	1078	ENSMUSG00000097222	1010001N08Rik	RIKEN cDNA 1010001N08 gene
chr2	125695915	125696641	727	*	518	1.37371	5.7414	1.99355e-07	merged_common	86.1187	33.233	Intron (ENSMUST00000042246.13/271849, intron 1 of 11)	2	125627447	125673632	46186	2	271849	ENSMUST00000110480.7	-22283	ENSMUSG00000035109	Shc4	SHC (Src homology 2 domain containing) family, member 4
chr6	22473900	22475080	1181	*	385	0.95762	6.76325	2.00113e-07	merged_common	151.383	77.948	Distal Intergenic	6	22307882	22356243	48362	2	27999	ENSMUST00000081288.13	-117657	ENSMUSG00000029672	Fam3c	family with sequence similarity 3, member C
chr16	24193377	24193885	509	*	424	1.7374	5.10473	2.03801e-07	ATAC_KO_PBS_unique	62.8321	18.844	Intron (ENSMUST00000230383.1/ENSMUST00000230383.1, intron 2 of 3)	16	24076388	24082690	6303	2	108168278	ENSMUST00000230580.1	-110687	NA	Gm46545	predicted gene, 46545
chr2	132212083	132212662	580	*	454	1.48589	5.54671	2.04611e-07	ATAC_KO_PBS_unique	78.2303	27.9304	Intron (ENSMUST00000131603.1/ENSMUST00000131603.1, intron 2 of 2)	2	132239492	132247654	8163	2	70612	ENSMUST00000110164.7	34992	ENSMUSG00000027341	Tmem230	transmembrane protein 230
chr7	100500700	100504431	3732	*	2132	1.36409	5.79436	2.07582e-07	ATAC_KO_PBS_unique	89.0414	34.5908	3' UTR	7	100498346	100499302	957	1	22228	ENSMUST00000149808.1	2354	ENSMUSG00000033685	Ucp2	uncoupling protein 2 (mitochondrial, proton carrier)
chr7	113780148	113780224	77	*	42	1.96417	4.76958	2.08767e-07	ATAC_KO_PBS_unique	53.8795	13.8086	Intron (ENSMUST00000046687.15/233744, intron 1 of 15)	7	113766174	113932081	165908	1	233744	ENSMUST00000084696.5	13974	ENSMUSG00000038156	Spon1	spondin 1, (f-spondin) extracellular matrix protein
chr13	56334775	56335209	435	*	258	1.96417	4.76958	2.08767e-07	ATAC_KO_PBS_unique	53.8795	13.8086	Distal Intergenic	13	56362900	56368857	5958	1	100038494	ENSMUST00000223775.1	-27691	ENSMUSG00000074885	Gm10782	predicted gene 10782
chr19	9978265	9978952	688	*	233	1.53086	5.42587	2.14504e-07	ATAC_KO_PBS_unique	73.0747	25.289	Distal Intergenic	19	9982703	9985092	2390	1	14319	ENSMUST00000025563.6	-3751	ENSMUSG00000024661	Fth1	ferritin heavy polypeptide 1
chr7	30953186	30954308	1123	*	492	-0.80616	7.21366	2.16173e-07	merged_common	112.251	196.276	Intron (ENSMUST00000058860.13/22282, intron 7 of 9)	7	30946751	30955450	8700	2	22282	ENSMUST00000169496.7	1142	ENSMUSG00000058239	Usf2	upstream transcription factor 2
chr11	83639883	83640569	687	*	442	1.19216	6.10167	2.16618e-07	merged_common	103.806	45.4305	Distal Intergenic	11	83647844	83649355	1512	2	20302	ENSMUST00000001008.5	8786	ENSMUSG00000000982	Ccl3	chemokine (C-C motif) ligand 3
chr14	103058959	103059892	934	*	219	1.19216	6.10167	2.16618e-07	merged_common	103.806	45.4305	Distal Intergenic	14	103070216	103077628	7413	1	211286	ENSMUST00000022721.7	-10324	ENSMUSG00000022125	Cln5	ceroid-lipofuscinosis, neuronal 5
chr3	40705000	40705403	404	*	242	2.03785	4.67104	2.22547e-07	ATAC_KO_PBS_unique	51.6238	12.5718	Distal Intergenic	3	40708855	40726096	17242	1	73333	ENSMUST00000091184.8	-3452	ENSMUSG00000069041	Slc25a31	solute carrier family 25 (mitochondrial carrier; adenine nucleotide translocator), member 31
chr9	22122510	22122847	338	*	254	2.03785	4.67104	2.22547e-07	ATAC_KO_PBS_unique	51.6238	12.5718	Intron (ENSMUST00000214165.1/ENSMUST00000214165.1, intron 2 of 3)	9	22112991	22117172	4182	2	66126	ENSMUST00000013966.7	-5338	ENSMUSG00000013822	Elof1	ELF1 homolog, elongation factor 1
chr19	60939837	60940260	424	*	280	2.03785	4.67104	2.22547e-07	ATAC_KO_PBS_unique	51.6238	12.5718	Intron (ENSMUST00000003313.8/14773, intron 1 of 15)	19	60889749	61092553	202805	1	14773	ENSMUST00000003313.8	50088	ENSMUSG00000003228	Grk5	G protein-coupled receptor kinase 5
chr9	113928429	113929315	887	*	350	0.99692	6.64313	2.22751e-07	merged_common	141.199	70.7506	Distal Intergenic	9	113930934	113977199	46266	1	22221	ENSMUST00000009885.13	-1619	ENSMUSG00000009741	Ubp1	upstream binding protein 1
chr1	186855368	186856100	733	*	334	1.06078	6.45607	2.24673e-07	merged_common	126.804	60.7865	Distal Intergenic	1	186720978	186749358	28381	2	67223	ENSMUST00000001339.5	-106010	ENSMUSG00000001305	Rrp15	ribosomal RNA processing 15 homolog (S. cerevisiae)
chr4	145270002	145270834	833	*	342	1.06078	6.45607	2.24673e-07	merged_common	126.804	60.7865	Intron (ENSMUST00000030339.12/21941, intron 12 of 12)	4	145225416	145246870	21455	2	21938	ENSMUST00000143055.1	-23132	ENSMUSG00000028599	Tnfrsf1b	tumor necrosis factor receptor superfamily, member 1b
chr15	25828360	25829156	797	*	309	0.92359	6.82384	2.26038e-07	merged_common	156.025	82.2558	Distal Intergenic	15	25843180	25973687	130508	1	66270	ENSMUST00000022881.14	-14024	ENSMUSG00000022270	Retreg1	reticulophagy regulator 1
chr17	77932790	77933665	876	*	554	-1.02247	6.55638	2.26199e-07	merged_common	66.0344	134.142	Distal Intergenic	17	78200248	78376592	176345	1	50766	ENSMUST00000112498.2	-266583	ENSMUSG00000024074	Crim1	cysteine rich transmembrane BMP regulator 1 (chordin like)
chr16	8784716	8785073	358	*	248	1.80424	5.03841	2.27715e-07	ATAC_KO_PBS_unique	61.4155	17.5852	Intron (ENSMUST00000160405.7/252870, intron 1 of 31)	16	8689595	8792308	102714	2	252870	ENSMUST00000160405.7	7235	ENSMUSG00000022710	Usp7	ubiquitin specific peptidase 7
chr18	24245639	24246548	910	*	441	1.39632	5.69347	2.34171e-07	ATAC_KO_PBS_unique	83.96	31.8961	Promoter	18	24246086	24271669	25584	1	14423	ENSMUST00000164066.1	0	ENSMUSG00000000420	Galnt1	polypeptide N-acetylgalactosaminyltransferase 1
chr13	110568484	110569133	650	*	257	1.51476	5.4915	2.37813e-07	ATAC_KO_PBS_unique	76.0502	26.6141	Distal Intergenic	13	110397797	110399035	1239	1	20620	ENSMUST00000225156.1	170687	ENSMUSG00000021701	Plk2	polo like kinase 2
chr6	52471377	52471920	544	*	322	1.51476	5.4915	2.37813e-07	merged_common	76.0502	26.6141	Distal Intergenic	6	52492451	52500086	7636	1	74304	ENSMUST00000203771.1	-20531	ENSMUSG00000107895	1700094M24Rik	RIKEN cDNA 1700094M24 gene
chr12	91747951	91748754	804	*	460	0.99819	6.61388	2.38035e-07	merged_common	138.426	69.3001	Intron (ENSMUST00000052969.14/108800, intron 1 of 6)	12	91743618	91746084	2467	2	108800	ENSMUST00000166967.1	-1867	ENSMUSG00000020961	Ston2	stonin 2
chr15	63497224	63497603	380	*	77	2.43191	4.16546	2.38422e-07	ATAC_KO_PBS_unique	41.6838	7.72484	Intron (ENSMUST00000228339.2/432958, intron 2 of 8)	15	63414400	63479608	65209	2	432958	ENSMUST00000226699.1	-17616	ENSMUSG00000115520	Gm20740	predicted gene, 20740
chr15	48837627	48838499	873	*	659	-0.94796	6.7463	2.38634e-07	merged_common	77.2959	149.115	Distal Intergenic	15	47580722	48792063	1211342	2	239420	ENSMUST00000162830.7	-45564	ENSMUSG00000022311	Csmd3	CUB and Sushi multiple domains 3
chr1	170973036	170973270	235	*	36	2.96509	3.56464	2.4027e-07	ATAC_KO_PBS_unique	33.0639	4.23422	Intron (ENSMUST00000027966.13/14130, intron 1 of 7)	1	170958617	170976127	17511	2	14130	ENSMUST00000027966.13	2857	ENSMUSG00000026656	Fcgr2b	Fc receptor, IgG, low affinity IIb
chr10	86124263	86124433	171	*	33	2.96509	3.56464	2.4027e-07	ATAC_KO_PBS_unique	33.0639	4.23422	Intron (ENSMUST00000120638.7/27204, intron 7 of 13)	10	86095859	86113586	17728	1	78170	ENSMUST00000218077.1	28404	ENSMUSG00000112493	4930486F22Rik	RIKEN cDNA 4930486F22 gene
chr9	50833660	50834406	747	*	289	-1.15868	6.21011	2.42163e-07	merged_common	49.5485	110.619	Intron (ENSMUST00000034561.10/102580, intron 14 of 14)	9	50835571	50843091	7521	1	102580	ENSMUST00000162596.1	-1165	ENSMUSG00000032059	Alg9	asparagine-linked glycosylation 9 (alpha 1,2 mannosyltransferase)
chr9	7558191	7558524	334	*	215	2.07411	4.53841	2.4275e-07	ATAC_KO_PBS_unique	47.685	11.3243	Promoter	9	7558456	7568485	10030	1	17394	ENSMUST00000018765.3	0	ENSMUSG00000005800	Mmp8	matrix metallopeptidase 8
chr11	110473488	110473920	433	*	95	2.07411	4.53841	2.4275e-07	ATAC_KO_PBS_unique	47.685	11.3243	Intron (ENSMUST00000020949.11/26399, intron 1 of 11)	11	110477377	110499522	22146	1	26399	ENSMUST00000146540.7	-3457	ENSMUSG00000020623	Map2k6	mitogen-activated protein kinase kinase 6
chr2	164910828	164912490	1663	*	874	-0.79155	7.26569	2.43539e-07	merged_common	116.964	202.456	Promoter	2	164891882	164911757	19876	2	329559	ENSMUST00000041361.13	0	ENSMUSG00000039834	Zfp335	zinc finger protein 335
chr2	46443106	46443635	530	*	203	1.63539	5.23685	2.44885e-07	ATAC_KO_PBS_unique	66.466	21.3943	Distal Intergenic	2	45696800	45698067	1268	1	69405	ENSMUST00000134308.1	746306	ENSMUSG00000086202	1700019E08Rik	RIKEN cDNA 1700019E08 gene
chr3	57550504	57550916	413	*	192	1.61885	5.22766	2.44885e-07	ATAC_KO_PBS_unique	65.6665	21.3807	Intron (ENSMUST00000029380.13/97064, intron 2 of 6)	3	57455649	57575828	120180	2	97064	ENSMUST00000029380.13	24912	ENSMUSG00000027803	Wwtr1	WW domain containing transcription regulator 1
chr8	117700676	117700972	297	*	223	2.30205	4.30735	2.46004e-07	ATAC_KO_PBS_unique	43.9678	8.91556	Promoter	8	117701904	117759027	57124	1	15486	ENSMUST00000034304.8	-932	ENSMUSG00000031844	Hsd17b2	hydroxysteroid (17-beta) dehydrogenase 2
chr18	67536656	67536938	283	*	155	2.30205	4.30735	2.46004e-07	ATAC_KO_PBS_unique	43.9678	8.91556	Intron (ENSMUST00000045105.12/68166, intron 2 of 14)	18	67490990	67549252	58263	2	68166	ENSMUST00000224799.1	12314	ENSMUSG00000024533	Spire1	spire type actin nucleation factor 1
chr9	108121291	108121471	181	*	50	2.1923	4.43518	2.47074e-07	ATAC_KO_PBS_unique	46.2484	10.1192	Intron (ENSMUST00000035208.13/12217, intron 3 of 11)	9	108096023	108110413	14391	2	12217	ENSMUST00000124763.1	-10878	ENSMUSG00000032589	Bsn	bassoon
chr10	39415604	39415903	300	*	178	2.1923	4.43518	2.47074e-07	ATAC_KO_PBS_unique	46.2484	10.1192	Intron (ENSMUST00000148152.7/14360, intron 2 of 4)	10	39420009	39511859	91851	1	14360	ENSMUST00000157009.7	-4106	ENSMUSG00000019843	Fyn	Fyn proto-oncogene
chr10	43034645	43035157	513	*	306	1.56325	5.36566	2.47088e-07	ATAC_KO_PBS_unique	70.8789	23.9846	Exon (ENSMUST00000213522.1/ENSMUST00000213522.1, exon 1 of 3)	10	42939881	42958721	18841	1	268297	ENSMUST00000127675.1	94764	ENSMUSG00000044770	Scml4	Scm polycomb group protein like 4
chr11	44380682	44381089	408	*	203	1.56325	5.36566	2.47088e-07	ATAC_KO_PBS_unique	70.8789	23.9846	Distal Intergenic	11	44400063	44414010	13948	1	16160	ENSMUST00000170513.2	-18974	ENSMUSG00000004296	Il12b	interleukin 12b
chr1	88227023	88227818	796	*	236	-1.09019	6.37221	2.48058e-07	merged_common	56.7723	120.869	Promoter	1	88227031	88262289	35259	1	100040766	ENSMUST00000113130.7	0	ENSMUSG00000079429	Mroh2a	maestro heat-like repeat family member 2A
chr18	75371250	75371897	648	*	370	-1.09019	6.37221	2.48058e-07	merged_common	56.7723	120.869	Intron (ENSMUST00000026999.9/17131, intron 2 of 3)	18	75369976	75394365	24390	1	17131	ENSMUST00000174411.1	1274	ENSMUSG00000025880	Smad7	SMAD family member 7
chr12	32163686	32164035	350	*	194	1.16451	6.17298	2.48694e-07	merged_common	108.026	48.1921	Distal Intergenic	12	32200551	32201009	459	2	30955	ENSMUST00000126814.1	36974	ENSMUSG00000020573	Pik3cg	phosphatidylinositol-4,5-bisphosphate 3-kinase catalytic subunit gamma
chr5	43218081	43218933	853	*	463	1.32016	5.8262	2.5227e-07	merged_common	89.653	35.9052	Intron (ENSMUST00000187911.6/665934, intron 1 of 5)	5	43233170	43289724	56555	1	231207	ENSMUST00000169035.7	-14237	ENSMUSG00000039782	Cpeb2	cytoplasmic polyadenylation element binding protein 2
chrY	90801150	90801298	149	*	70	-1.34635	5.82463	2.5227e-07	ATAC_Control_PBS_unique	35.5421	90.3721	Intron (ENSMUST00000179483.7/170942, intron 3 of 3)	21	90785586	90816464	30879	1	170942	ENSMUST00000179077.1	15564	ENSMUSG00000096768	Erdr1	erythroid differentiation regulator 1
chr8	89392604	89393363	760	*	353	-0.86326	7.00561	2.53498e-07	merged_common	95.272	173.313	Distal Intergenic	8	89027235	89044162	16928	2	58198	ENSMUST00000034090.7	-348442	ENSMUSG00000031665	Sall1	spalt like transcription factor 1
chr13	5614248	5615380	1133	*	825	0.95934	6.70893	2.56894e-07	merged_common	145.876	75.0229	Intron (ENSMUST00000222871.1/ENSMUST00000222871.1, intron 2 of 2)	13	5855515	5857561	2047	2	71867	ENSMUST00000223142.1	242181	ENSMUSG00000100625	1700016G22Rik	RIKEN cDNA 1700016G22 gene
chr2	90542473	90543254	782	*	422	1.20678	6.06464	2.57693e-07	merged_common	101.69	44.0555	Intron (ENSMUST00000168621.2/19271, intron 1 of 23)	2	90432889	90580647	147759	2	19271	ENSMUST00000168621.2	37393	ENSMUSG00000025314	Ptprj	protein tyrosine phosphatase, receptor type, J
chr17	48323828	48324735	908	*	575	1.42017	5.64386	2.74833e-07	ATAC_KO_PBS_unique	81.7952	30.5643	3' UTR	17	48316424	48318211	1788	1	320148	ENSMUST00000124205.1	7404	ENSMUSG00000043740	B430306N03Rik	RIKEN cDNA B430306N03 gene
chr11	5955227	5956065	839	*	493	-0.96948	6.67657	2.76125e-07	merged_common	73.1016	143.143	Promoter	11	5955693	5967780	12088	1	56418	ENSMUST00000002818.8	0	ENSMUSG00000002741	Ykt6	YKT6 v-SNARE homolog (S. cerevisiae)
chr9	24069792	24070043	252	*	159	-1.65501	5.16993	2.77519e-07	merged_common	20.2862	63.8863	Distal Intergenic	9	24097996	24289892	191897	1	319239	ENSMUST00000133787.7	-27953	ENSMUSG00000043659	Npsr1	neuropeptide S receptor 1
chr14	102978266	102978917	652	*	458	-1.65501	5.16993	2.77519e-07	ATAC_Control_PBS_unique	20.2862	63.8863	3' UTR	14	102982549	102982632	84	2	100628599	ENSMUST00000175160.1	3715	ENSMUSG00000092901	Mir5130	microRNA 5130
chr10	18237256	18237579	324	*	231	1.67582	5.1677	2.77519e-07	ATAC_KO_PBS_unique	64.2494	20.1093	Exon (ENSMUST00000181897.1/ENSMUST00000181897.1, exon 2 of 2)	10	18214078	18234998	20921	2	215814	ENSMUST00000173243.7	-2258	ENSMUSG00000059554	Ccdc28a	coiled-coil domain containing 28A
chr10	117281862	117282438	577	*	412	1.67582	5.1677	2.77519e-07	ATAC_KO_PBS_unique	64.2494	20.1093	Promoter	10	117277331	117282321	4991	2	17105	ENSMUST00000092163.8	0	ENSMUSG00000069516	Lyz2	lysozyme 2
chr11	29307978	29308077	100	*	41	1.67582	5.1677	2.77519e-07	ATAC_KO_PBS_unique	64.2494	20.1093	Distal Intergenic	11	29221532	29247409	25878	2	216618	ENSMUST00000020754.9	-60569	ENSMUSG00000020462	Cfap36	cilia and flagella associated protein 36
chr17	62642360	62643045	686	*	311	1.67582	5.1677	2.77519e-07	ATAC_KO_PBS_unique	64.2494	20.1093	Intron (ENSMUST00000076840.11/13640, intron 2 of 4)	17	62607319	62881144	273826	2	13640	ENSMUST00000078839.4	238099	ENSMUSG00000048915	Efna5	ephrin A5
chr2	178505744	178506983	1240	*	454	0.77359	7.28353	2.79645e-07	merged_common	203.703	119.158	Distal Intergenic	2	178460630	178466572	5943	1	381409	ENSMUST00000176869.1	45114	ENSMUSG00000039155	Cdh26	cadherin-like 26
chr19	6979103	6981202	2100	*	981	-0.46065	8.72999	2.81311e-07	merged_common	361.955	498.108	Promoter	19	6977741	6980440	2700	2	14227	ENSMUST00000070878.8	0	ENSMUSG00000056629	Fkbp2	FK506 binding protein 2
chr19	6275931	6277154	1224	*	815	1.07314	6.39324	2.82378e-07	merged_common	121.922	57.9473	Promoter	19	6276725	6300096	23372	1	13660	ENSMUST00000025684.3	0	ENSMUSG00000024772	Ehd1	EH-domain containing 1
chr1	42866008	42866349	342	*	209	1.61373	5.31148	2.83906e-07	ATAC_KO_PBS_unique	69.4713	22.6999	Intron (ENSMUST00000057208.12/69527, intron 2 of 10)	1	42862514	42899128	36615	1	69527	ENSMUST00000187414.1	3494	ENSMUSG00000060679	Mrps9	mitochondrial ribosomal protein S9
chr11	29308195	29308596	402	*	135	1.59799	5.30274	2.83906e-07	ATAC_KO_PBS_unique	68.676	22.6862	Distal Intergenic	11	29221532	29247409	25878	2	216618	ENSMUST00000020754.9	-60786	ENSMUSG00000020462	Cfap36	cilia and flagella associated protein 36
chr6	91693403	91694138	736	*	261	1.34897	5.72766	2.88143e-07	ATAC_KO_PBS_unique	84.5742	33.2015	Intron (ENSMUST00000032185.8/21366, intron 1 of 14)	6	91701657	91724863	23207	1	21366	ENSMUST00000205828.1	-7519	ENSMUSG00000030096	Slc6a6	solute carrier family 6 (neurotransmitter transporter, taurine), member 6
chr7	141016743	141017507	765	*	266	1.34897	5.72766	2.88143e-07	ATAC_KO_PBS_unique	84.5742	33.2015	Promoter	7	141015706	141016908	1203	2	213002	ENSMUST00000081924.4	0	ENSMUSG00000059108	Ifitm6	interferon induced transmembrane protein 6
chr17	64721578	64721727	150	*	53	1.3614	5.73457	2.88143e-07	ATAC_KO_PBS_unique	85.3471	33.2175	Intron (ENSMUST00000086723.9/17158, intron 16 of 21)	17	64713619	64754838	41220	1	17158	ENSMUST00000169668.1	7959	ENSMUSG00000024085	Man2a1	mannosidase 2, alpha 1
chr10	21976166	21976906	741	*	260	1.34897	5.72766	2.88143e-07	merged_common	84.5742	33.2015	Intron (ENSMUST00000120509.7/20393, intron 3 of 13)	10	21978672	21995893	17222	1	20393	ENSMUST00000142174.7	-1766	ENSMUSG00000019970	Sgk1	serum/glucocorticoid regulated kinase 1
chrX	74243434	74244163	730	*	377	1.17808	6.13777	2.96365e-07	merged_common	105.918	46.8095	Intron (ENSMUST00000144429.7/192176, intron 1 of 46)	20	74223789	74246364	22576	2	192176	ENSMUST00000130007.7	2201	ENSMUSG00000031328	Flna	filamin, alpha
chr13	40722762	40723420	659	*	195	1.35224	5.78777	2.97981e-07	ATAC_KO_PBS_unique	88.2724	34.5748	Exon (ENSMUST00000224038.1/ENSMUST00000224038.1, exon 1 of 1)	13	40727808	40735162	7355	1	102633805	ENSMUST00000181176.2	-4388	ENSMUSG00000097752	Gm26688	predicted gene, 26688
chr3	116424540	116425268	729	*	577	1.34027	5.78112	2.97981e-07	merged_common	87.5027	34.5589	Promoter	3	116326039	116424032	97994	2	229776	ENSMUST00000127704.7	-508	ENSMUSG00000033502	Cdc14a	CDC14 cell division cycle 14A
chr11	69059152	69060211	1060	*	453	-0.71771	7.47126	2.99938e-07	merged_common	138.372	227.562	Promoter	11	69059717	69061578	1862	1	71923	ENSMUST00000051888.3	0	ENSMUSG00000045176	Borcs6	BLOC-1 related complex subunit 6
chr10	120219682	120220404	723	*	466	1.45826	5.53136	3.01126e-07	merged_common	76.6647	27.9007	Promoter	10	120220688	120224739	4052	1	68212	ENSMUST00000134203.7	-284	ENSMUSG00000020225	Tmbim4	transmembrane BAX inhibitor motif containing 4
chr10	91270211	91270910	700	*	313	1.28955	5.86353	3.04492e-07	merged_common	91.0322	37.2393	Distal Intergenic	10	91208258	91220642	12385	2	102633753	ENSMUST00000216311.1	-49569	NA	4930534H03Rik	RIKEN cDNA 4930534H03 gene
chr2	148490315	148491004	690	*	449	1.87838	4.85022	3.05559e-07	ATAC_KO_PBS_unique	55.3078	15.0431	Distal Intergenic	2	148436640	148443563	6924	2	17064	ENSMUST00000099269.3	-46752	ENSMUSG00000027435	Cd93	CD93 antigen
chr6	16883469	16883809	341	*	271	1.87838	4.85022	3.05559e-07	ATAC_KO_PBS_unique	55.3078	15.0431	Intron (ENSMUST00000031533.10/21426, intron 1 of 6)	6	16833388	16898399	65012	2	21426	ENSMUST00000202997.1	14590	ENSMUSG00000029553	Tfec	transcription factor EC
chr10	88405613	88406127	515	*	400	1.87838	4.85022	3.05559e-07	ATAC_KO_PBS_unique	55.3078	15.0431	Intron (ENSMUST00000127615.7/432486, intron 3 of 5)	10	88429566	88433288	3723	1	432486	ENSMUST00000132738.1	-23439	ENSMUSG00000035311	Gnptab	N-acetylglucosamine-1-phosphate transferase, alpha and beta subunits
chr10	17795905	17796629	725	*	280	1.28269	5.91228	3.079e-07	merged_common	93.9372	38.6109	Promoter	10	17796226	17807908	11683	1	378431	ENSMUST00000175676.1	0	ENSMUSG00000039891	Txlnb	taxilin beta
chr8	18954397	18954613	217	*	41	1.23781	5.98757	3.0848e-07	ATAC_KO_PBS_unique	97.4422	41.317	Distal Intergenic	8	18932729	18950975	18247	2	319581	ENSMUST00000095438.9	-3422	ENSMUSG00000039814	Xkr5	X-linked Kx blood group related 5
chr11	34033929	34034541	613	*	124	1.22712	5.98163	3.0848e-07	ATAC_KO_PBS_unique	96.683	41.3	Intron (ENSMUST00000141450.1/76874, intron 4 of 4)	11	34046920	34092295	45376	1	16822	ENSMUST00000052413.11	-12379	ENSMUSG00000002699	Lcp2	lymphocyte cytosolic protein 2
chr3	121570617	121571999	1383	*	238	1.11472	6.30574	3.09554e-07	merged_common	116.412	53.757	Distal Intergenic	3	121459528	121532404	72877	2	213603	ENSMUST00000039197.8	-38213	ENSMUSG00000039865	Slc44a3	solute carrier family 44, member 3
chr7	104401244	104401451	208	*	118	1.71973	5.09491	3.13157e-07	ATAC_KO_PBS_unique	62.0249	18.8311	Distal Intergenic	7	104411685	104412267	583	2	20128	ENSMUST00000142124.1	10816	ENSMUSG00000030921	Trim30a	tripartite motif-containing 30A
chr13	108268332	108268488	157	*	58	1.71973	5.09491	3.13157e-07	ATAC_KO_PBS_unique	62.0249	18.8311	Intron (ENSMUST00000022207.9/74559, intron 3 of 7)	13	108316332	108389585	73254	1	218581	ENSMUST00000051594.11	-47844	ENSMUSG00000021697	Depdc1b	DEP domain containing 1B
chr19	59074626	59075218	593	*	286	1.71973	5.09491	3.13157e-07	ATAC_KO_PBS_unique	62.0249	18.8311	Promoter	19	58973358	59076069	102712	2	71653	ENSMUST00000047511.13	851	ENSMUSG00000041362	Shtn1	shootin 1
chr14	120665237	120665420	184	*	31	3.26402	3.26958	3.17581e-07	ATAC_KO_PBS_unique	29.89	3.11141	Distal Intergenic	14	120478444	120507194	28751	1	76108	ENSMUST00000062117.13	186793	ENSMUSG00000051615	Rap2a	RAS related protein 2a
chr9	50522488	50522983	496	*	275	1.51602	5.41763	3.19567e-07	merged_common	72.2858	25.2747	Exon (ENSMUST00000217146.1/ENSMUST00000217146.1, exon 1 of 1)	9	50524744	50528638	3895	2	19286	ENSMUST00000216836.1	5655	ENSMUSG00000032067	Pts	6-pyruvoyl-tetrahydropterin synthase
chr7	25245936	25246242	307	*	219	-1.44696	5.60716	3.22255e-07	ATAC_Control_PBS_unique	29.5212	80.4845	Exon (ENSMUST00000045847.14/13875, exon 2 of 4)	7	25245447	25250730	5284	2	13875	ENSMUST00000116343.2	4488	ENSMUSG00000040857	Erf	Ets2 repressor factor
chr5	137532611	137533804	1194	*	695	-0.70945	7.51447	3.22314e-07	merged_common	142.987	233.81	Promoter	5	137483020	137533242	50223	2	13856	ENSMUST00000111038.7	0	ENSMUSG00000029711	Epo	erythropoietin
chr6	16963863	16964647	785	*	307	1.03364	6.50779	3.2257e-07	merged_common	130.202	63.6007	Distal Intergenic	6	16841416	16898441	57026	2	21426	ENSMUST00000201104.1	-65422	ENSMUSG00000029553	Tfec	transcription factor EC
chr11	6443806	6444909	1104	*	819	-0.60001	7.9855	3.23005e-07	merged_common	205.856	312.022	Promoter	11	6427229	6444443	17215	2	77605	ENSMUST00000109737.8	0	ENSMUSG00000041126	H2afv	H2A histone family, member V
chr6	53369992	53370295	304	*	172	1.94306	4.75785	3.31571e-07	ATAC_KO_PBS_unique	53.0536	13.7974	Intron (ENSMUST00000205222.2/231991, intron 2 of 3)	6	53310871	53694818	383948	1	231991	ENSMUST00000047450.9	59121	ENSMUSG00000053007	Creb5	cAMP responsive element binding protein 5
chr10	44069049	44069450	402	*	281	1.94306	4.75785	3.31571e-07	ATAC_KO_PBS_unique	53.0536	13.7974	Intron (ENSMUST00000200401.1/11630, intron 1 of 21)	10	43950638	44004369	53732	2	11630	ENSMUST00000020017.13	-64680	ENSMUSG00000019866	Crybg1	crystallin beta-gamma domain containing 1
chr15	37787390	37787786	397	*	307	1.94306	4.75785	3.31571e-07	ATAC_KO_PBS_unique	53.0536	13.7974	Intron (ENSMUST00000168992.7/52589, intron 1 of 6)	15	37366175	37792000	425826	2	52589	ENSMUST00000168992.7	4214	ENSMUSG00000051359	Ncald	neurocalcin delta
chr1	171849395	171849909	515	*	289	1.08375	6.36311	3.37248e-07	merged_common	119.842	56.5414	Intron (ENSMUST00000155802.7/12523, intron 2 of 8)	1	171840633	171886430	45798	1	12523	ENSMUST00000042302.6	8762	ENSMUSG00000038147	Cd84	CD84 antigen
chr17	31753414	31753948	535	*	264	1.38365	5.68643	3.39144e-07	ATAC_KO_PBS_unique	83.1852	31.8806	Distal Intergenic	17	31679480	31681505	2026	1	12954	ENSMUST00000228305.1	73934	ENSMUSG00000024041	Cryaa	crystallin, alpha A
chr13	63007493	63007957	465	*	131	1.38365	5.68643	3.39144e-07	merged_common	83.1852	31.8806	Intron (ENSMUST00000222181.1/72061, intron 1 of 1)	13	63014934	63299656	284723	1	72061	ENSMUST00000091560.10	-6977	ENSMUSG00000021458	Aopep	aminopeptidase O
chr4	62329001	62329861	861	*	523	1.155	6.1677	3.44346e-07	merged_common	107.277	48.1746	Exon (ENSMUST00000139308.1/338355, exon 2 of 18)	4	62300342	62332294	31953	2	338355	ENSMUST00000139308.1	2433	ENSMUSG00000066151	Fkbp15	FK506 binding protein 15
chr11	85139525	85140624	1100	*	554	-0.58988	7.9985	3.50155e-07	merged_common	208.45	313.743	Promoter	11	84984442	85140038	155597	2	237898	ENSMUST00000108075.8	0	ENSMUSG00000000804	Usp32	ubiquitin specific peptidase 32
chr3	28099114	28099538	425	*	293	1.76766	5.01809	3.51662e-07	ATAC_KO_PBS_unique	59.7936	17.5605	Intron (ENSMUST00000120834.7/18805, intron 20 of 26)	3	28109759	28130795	21037	1	18805	ENSMUST00000126594.2	-10221	ENSMUSG00000027695	Pld1	phospholipase D1
chr10	61751667	61752233	567	*	383	1.76766	5.01809	3.51662e-07	ATAC_KO_PBS_unique	59.7936	17.5605	Exon (ENSMUST00000020283.4/404634, exon 4 of 9)	10	61774737	61774821	85	1	100628583	ENSMUST00000175276.1	-22504	ENSMUSG00000093017	Mir5108	microRNA 5108
chr17	27552457	27553255	799	*	158	-1.17213	6.10777	3.53182e-07	merged_common	45.9408	103.525	Exon (ENSMUST00000231925.1/ENSMUST00000231925.1, exon 1 of 1)	17	27556497	27562846	6350	1	15361	ENSMUST00000118599.8	-3242	ENSMUSG00000046711	Hmga1	high mobility group AT-hook 1
chr1	58504566	58505384	819	*	468	0.90446	6.83886	3.5683e-07	merged_common	156.616	83.6695	Promoter	1	58462771	58505109	42339	2	18393	ENSMUST00000027198.11	0	ENSMUSG00000026037	Orc2	origin recognition complex, subunit 2
chr5	99336295	99336870	576	*	400	1.19659	6.05898	3.60064e-07	merged_common	100.934	44.0382	Intron (ENSMUST00000209346.1/320292, intron 4 of 16)	5	99217426	99252927	35502	2	320292	ENSMUST00000168092.7	-83368	ENSMUSG00000089809	Rasgef1b	RasGEF domain family, member 1B
chr11	74829645	74831069	1425	*	788	-0.49621	8.50798	3.62537e-07	merged_common	306.528	432.359	Promoter	11	74830920	74845725	14806	1	17428	ENSMUST00000000291.8	0	ENSMUSG00000000282	Mnt	max binding protein
chrX	159638532	159639180	649	*	212	1.24335	5.94132	3.66442e-07	merged_common	94.5493	39.9368	Intron (ENSMUST00000112456.8/58194, intron 1 of 17)	20	159627541	159973169	345629	1	58194	ENSMUST00000073094.9	10991	ENSMUSG00000040990	Sh3kbp1	SH3-domain kinase binding protein 1
chr12	8432699	8433344	646	*	427	1.24335	5.94132	3.66442e-07	merged_common	94.5493	39.9368	Distal Intergenic	12	8497661	8500009	2349	2	11852	ENSMUST00000067384.5	66665	ENSMUSG00000054364	Rhob	ras homolog family member B
chr7	101088668	101089174	507	*	314	-1.52268	5.35798	3.69331e-07	ATAC_Control_PBS_unique	24.195	69.5183	Distal Intergenic	7	101092863	101196903	104041	1	207278	ENSMUST00000208439.1	-3689	ENSMUSG00000030691	Fchsd2	FCH and double SH3 domains 2
chr8	71665526	71666107	582	*	142	1.54788	5.35712	3.69331e-07	ATAC_KO_PBS_unique	70.0863	23.9704	Exon (ENSMUST00000030170.14/382018, exon 3 of 44)	8	71660346	71668082	7737	2	382018	ENSMUST00000175780.1	1975	ENSMUSG00000034799	Unc13a	unc-13 homolog A
chr11	11573540	11574018	479	*	304	1.60209	5.21836	3.7155e-07	ATAC_KO_PBS_unique	64.8667	21.367	Intron (ENSMUST00000146304.1/ENSMUST00000146304.1, intron 1 of 2)	11	11589223	11627824	38602	2	102631730	ENSMUST00000081896.4	53806	ENSMUSG00000062511	4930512M02Rik	RIKEN cDNA 4930512M02 gene
chr14	63447711	63448236	526	*	102	1.60209	5.21836	3.7155e-07	ATAC_KO_PBS_unique	64.8667	21.367	Intron (ENSMUST00000121288.1/219148, intron 2 of 3)	14	63436409	63442056	5648	1	219148	ENSMUST00000128313.1	11302	ENSMUSG00000035095	Fam167a	family with sequence similarity 167, member A
chr1	58445108	58445899	792	*	451	0.93174	6.72147	3.75201e-07	merged_common	145.749	76.4053	Promoter	1	58445151	58463456	18306	1	65102	ENSMUST00000087521.12	0	ENSMUSG00000026036	Nif3l1	Ngg1 interacting factor 3-like 1 (S. pombe)
chr3	137292861	137293626	766	*	407	0.93174	6.72147	3.75201e-07	merged_common	145.749	76.4053	Intron (ENSMUST00000197127.1/ENSMUST00000197127.1, intron 1 of 2)	3	137341067	137432185	91119	1	59308	ENSMUST00000122064.7	-47441	ENSMUSG00000054690	Emcn	endomucin
chr7	31007832	31008689	858	*	535	1.41835	5.57741	3.77473e-07	ATAC_KO_PBS_unique	78.064	29.2068	Distal Intergenic	7	30981870	30989462	7593	1	76415	ENSMUST00000128384.2	25962	ENSMUSG00000046826	Fam187b	family with sequence similarity 187, member B
chr17	72787696	72788443	748	*	510	1.06485	6.38863	3.8278e-07	merged_common	121.184	57.9286	Distal Intergenic	17	72836453	72851195	14743	1	383295	ENSMUST00000045174.6	-48010	ENSMUSG00000039770	Ypel5	yippee like 5
chr9	53633363	53633454	92	*	40	2.04984	4.52492	3.94983e-07	ATAC_KO_PBS_unique	46.8456	11.3137	Exon (ENSMUST00000141180.7/75717, exon 7 of 8)	9	53616600	53622034	5435	2	75717	ENSMUST00000141803.1	-11329	ENSMUSG00000032030	Cul5	cullin 5
chr11	118404551	118404911	361	*	73	2.04984	4.52492	3.94983e-07	ATAC_KO_PBS_unique	46.8456	11.3137	Downstream (1-2kb)	11	118392751	118402092	9342	2	19039	ENSMUST00000043722.9	-2459	ENSMUSG00000033880	Lgals3bp	lectin, galactoside-binding, soluble, 3 binding protein
chr18	53770212	53770531	320	*	142	2.04984	4.52492	3.94983e-07	ATAC_KO_PBS_unique	46.8456	11.3137	Distal Intergenic	18	53681724	53744547	62824	2	225523	ENSMUST00000049811.6	-25665	ENSMUSG00000048799	Cep120	centrosomal protein 120
chr4	121197038	121197475	438	*	237	1.40712	5.63661	3.98873e-07	ATAC_KO_PBS_unique	81.018	30.5489	Intron (ENSMUST00000056635.12/109263, intron 1 of 7)	4	121170777	121188534	17758	2	109263	ENSMUST00000142647.1	-8504	ENSMUSG00000049878	Rlf	rearranged L-myc fusion sequence
chr1	35810562	35810980	419	*	217	-1.37675	5.64616	3.98873e-07	merged_common	31.0772	80.7021	Distal Intergenic	1	36068400	36106446	38047	1	50785	ENSMUST00000088174.3	-257420	ENSMUSG00000045216	Hs6st1	heparan sulfate 6-O-sulfotransferase 1
chr5	125140488	125141751	1264	*	648	-0.78095	7.22766	4.01863e-07	merged_common	114.34	196.466	Intron (ENSMUST00000111402.8/20602, intron 1 of 47)	5	125017835	125124900	107066	2	20602	ENSMUST00000055256.13	-15588	ENSMUSG00000029478	Ncor2	nuclear receptor co-repressor 2
chr17	73034151	73035033	883	*	471	0.80916	7.10758	4.02845e-07	merged_common	182.552	104.185	Distal Intergenic	17	73107985	73161991	54007	1	225010	ENSMUST00000130574.3	-72952	ENSMUSG00000054469	Lclat1	lysocardiolipin acyltransferase 1
chr11	121236451	121237942	1492	*	609	-0.54489	8.21718	4.0501e-07	merged_common	246.379	359.444	Promoter	11	121237253	121255856	18604	1	67608	ENSMUST00000103015.3	0	ENSMUSG00000000056	Narf	nuclear prelamin A recognition factor
chr2	14192089	14192408	320	*	153	2.16709	4.42118	4.05907e-07	ATAC_KO_PBS_unique	45.4033	10.1095	Exon (ENSMUST00000077517.8/625286, exon 2 of 4)	2	14174523	14221993	47471	1	625286	ENSMUST00000077517.8	17566	ENSMUSG00000061531	Tmem236	transmembrane protein 236
chr3	68646490	68646899	410	*	97	2.14137	4.40689	4.05907e-07	ATAC_KO_PBS_unique	44.5568	10.0994	Distal Intergenic	3	68690644	68698547	7904	1	16159	ENSMUST00000029345.11	-43745	ENSMUSG00000027776	Il12a	interleukin 12a
chr11	119875748	119875975	228	*	72	2.14137	4.40689	4.05907e-07	ATAC_KO_PBS_unique	44.5568	10.0994	Intron (ENSMUST00000026671.12/74370, intron 24 of 33)	11	119857444	119884967	27524	1	74370	ENSMUST00000131217.1	18304	ENSMUSG00000025583	Rptor	regulatory associated protein of MTOR, complex 1
chr13	37104938	37105253	316	*	248	2.14137	4.40689	4.05907e-07	ATAC_KO_PBS_unique	44.5568	10.0994	Distal Intergenic	13	36867178	37050244	183067	2	74145	ENSMUST00000164727.7	-54694	ENSMUSG00000039109	F13a1	coagulation factor XIII, A1 subunit
chr17	64616306	64616685	380	*	85	2.16709	4.42118	4.05907e-07	ATAC_KO_PBS_unique	45.4033	10.1095	Intron (ENSMUST00000086723.9/17158, intron 1 of 21)	17	64600736	64755110	154375	1	17158	ENSMUST00000086723.9	15570	ENSMUSG00000024085	Man2a1	mannosidase 2, alpha 1
chr4	55730705	55730812	108	*	46	2.27527	4.29248	4.08459e-07	ATAC_KO_PBS_unique	43.1149	8.90642	Distal Intergenic	4	55527143	55532466	5324	2	16600	ENSMUST00000107619.2	-198239	ENSMUSG00000003032	Klf4	Kruppel-like factor 4 (gut)
chr13	43802813	43803131	319	*	89	2.27527	4.29248	4.08459e-07	ATAC_KO_PBS_unique	43.1149	8.90642	3' UTR	13	43785185	43803128	17944	1	12522	ENSMUST00000221359.1	17628	ENSMUSG00000015396	Cd83	CD83 antigen
chr10	44701952	44702794	843	*	392	1.03681	6.44275	4.09058e-07	merged_common	124.6	60.7303	Distal Intergenic	10	44446717	44528501	81785	2	12142	ENSMUST00000167340.1	-173451	ENSMUSG00000038151	Prdm1	PR domain containing 1, with ZNF domain
chr11	59538127	59538226	100	*	49	1.16835	6.13237	4.1065e-07	ATAC_KO_PBS_unique	105.167	46.7922	Distal Intergenic	11	59541568	59566955	25388	1	216799	ENSMUST00000079476.9	-3342	ENSMUSG00000032691	Nlrp3	NLR family, pyrin domain containing 3
chr10	66864166	66865026	861	*	477	0.8453	6.99762	4.21661e-07	merged_common	171.287	95.3374	Distal Intergenic	10	66915636	66917739	2104	2	68488	ENSMUST00000219021.1	52713	NA	1110002J07Rik	RIKEN cDNA 1110002J07 gene
chr12	25213629	25214555	927	*	365	0.96918	6.59776	4.22146e-07	merged_common	135.519	69.2225	Distal Intergenic	12	25129174	25134931	5758	1	432641	ENSMUST00000223429.1	84455	NA	Gm17746	predicted gene, 17746
chr1	88300602	88301094	493	*	184	-1.62535	5.15644	4.22886e-07	ATAC_Control_PBS_unique	20.305	62.6445	Intron (ENSMUST00000148138.7/171382, intron 1 of 5)	1	88303283	88388851	85569	1	171382	ENSMUST00000113114.9	-2189	ENSMUSG00000036251	Trpm8	transient receptor potential cation channel, subfamily M, member 8
chr2	120096291	120096827	537	*	143	1.65862	5.15814	4.22886e-07	ATAC_KO_PBS_unique	63.4457	20.0959	Intron (ENSMUST00000028755.7/98878, intron 5 of 5)	2	120102220	120129725	27506	2	98878	ENSMUST00000150240.7	32898	ENSMUSG00000027293	Ehd4	EH-domain containing 4
chr10	43702436	43702871	436	*	260	1.65862	5.15814	4.22886e-07	ATAC_KO_PBS_unique	63.4457	20.0959	Intron (ENSMUST00000215599.1/414125, intron 3 of 4)	10	43745809	43757569	11761	1	69443	ENSMUST00000213330.1	-42938	ENSMUSG00000111422	1700027J07Rik	RIKEN cDNA 1700027J07 gene
chr4	47418772	47419393	622	*	189	-1.54065	5.32012	4.25858e-07	ATAC_Control_PBS_unique	23.422	68.1407	Distal Intergenic	4	47386216	47411035	24820	1	21812	ENSMUST00000107725.2	32556	ENSMUSG00000007613	Tgfbr1	transforming growth factor, beta receptor I
chr10	121498071	121499101	1031	*	804	1.58205	5.29389	4.25858e-07	ATAC_KO_PBS_unique	67.88	22.6724	Distal Intergenic	10	121410350	121476347	65998	2	192678	ENSMUST00000026902.8	-21724	ENSMUSG00000025795	Rassf3	Ras association (RalGDS/AF-6) domain family member 3
chr8	57432883	57433063	181	*	92	2.92745	3.54373	4.2859e-07	ATAC_KO_PBS_unique	32.1658	4.22809	Distal Intergenic	8	57455923	57477585	21663	1	20284	ENSMUST00000034023.3	-22860	ENSMUSG00000031610	Scrg1	scrapie responsive gene 1
chr13	5601727	5601921	195	*	145	2.92745	3.54373	4.2859e-07	ATAC_KO_PBS_unique	32.1658	4.22809	Intron (ENSMUST00000222871.1/ENSMUST00000222871.1, intron 2 of 2)	13	5855515	5857561	2047	2	71867	ENSMUST00000223142.1	255640	ENSMUSG00000100625	1700016G22Rik	RIKEN cDNA 1700016G22 gene
chr19	21319476	21319563	88	*	30	2.92745	3.54373	4.2859e-07	ATAC_KO_PBS_unique	32.1658	4.22809	Distal Intergenic	19	21276040	21280971	4932	1	22682	ENSMUST00000133175.1	43436	ENSMUSG00000024750	Zfand5	zinc finger, AN1-type domain 5
chr17	53488511	53489144	634	*	297	1.21155	6.02083	4.28724e-07	merged_common	98.8114	42.6672	Intron (ENSMUST00000017975.6/271457, intron 2 of 5)	17	53479234	53507680	28447	1	271457	ENSMUST00000017975.6	9277	ENSMUSG00000017831	Rab5a	RAB5A, member RAS oncogene family
chr13	4608693	4609664	972	*	587	0.78188	7.23189	4.30298e-07	merged_common	197.106	114.639	Promoter	13	4590750	4609174	18425	2	56043	ENSMUST00000091848.6	0	ENSMUSG00000045410	Akr1e1	aldo-keto reductase family 1, member E1
chr12	112897461	112898294	834	*	504	1.27801	5.85712	4.3295e-07	ATAC_KO_PBS_unique	90.2669	37.2228	Distal Intergenic	12	112910455	112913180	2726	2	16450	ENSMUST00000221454.1	14886	ENSMUSG00000002799	Jag2	jagged 2
chr13	110601763	110602414	652	*	340	1.27801	5.85712	4.3295e-07	merged_common	90.2669	37.2228	Distal Intergenic	13	110397797	110399035	1239	1	20620	ENSMUST00000225156.1	203966	ENSMUSG00000021701	Plk2	polo like kinase 2
chr16	23314595	23315349	755	*	547	1.21635	5.97564	4.3366e-07	merged_common	95.9237	41.2827	Intron (ENSMUST00000023601.13/20440, intron 2 of 7)	16	23290470	23358595	68126	1	20440	ENSMUST00000115335.1	24125	ENSMUSG00000022885	St6gal1	beta galactoside alpha 2,6 sialyltransferase 1
chr12	71544361	71544951	591	*	159	1.27154	5.90609	4.35227e-07	merged_common	93.1743	38.5944	Intron (ENSMUST00000222756.1/73815, intron 5 of 5)	12	71540607	71556133	15527	1	73815	ENSMUST00000220948.1	3754	ENSMUSG00000113630	4930404H11Rik	RIKEN cDNA 4930404H11 gene
chr7	74683916	74684507	592	*	307	1.27154	5.90609	4.35227e-07	merged_common	93.1743	38.5944	Distal Intergenic	7	74295371	74554780	259410	2	108116	ENSMUST00000107453.7	-129136	ENSMUSG00000025790	Slco3a1	solute carrier organic anion transporter family, member 3a1
chr1	183320644	183321124	481	*	178	1.78091	4.91486	4.35831e-07	ATAC_KO_PBS_unique	55.9209	16.273	Promoter	1	183322113	183322825	713	1	108909	ENSMUST00000195268.1	-989	ENSMUSG00000042901	Aida	axin interactor, dorsalization associated
chr10	88409531	88410093	563	*	445	1.78091	4.91486	4.35831e-07	ATAC_KO_PBS_unique	55.9209	16.273	Intron (ENSMUST00000127615.7/432486, intron 3 of 5)	10	88429566	88433288	3723	1	432486	ENSMUST00000132738.1	-19473	ENSMUSG00000035311	Gnptab	N-acetylglucosamine-1-phosphate transferase, alpha and beta subunits
chr10	96015669	96016101	433	*	279	1.78091	4.91486	4.35831e-07	ATAC_KO_PBS_unique	55.9209	16.273	Intron (ENSMUST00000218291.1/216238, intron 12 of 17)	10	95940757	96002953	62197	1	216238	ENSMUST00000218517.1	74912	ENSMUSG00000036499	Eea1	early endosome antigen 1
chr10	77544748	77545439	692	*	328	1.09959	6.25871	4.41339e-07	merged_common	112.089	52.3064	Intron (ENSMUST00000000299.13/16414, intron 3 of 15)	10	77530380	77565708	35329	1	16414	ENSMUST00000153541.1	14368	ENSMUSG00000000290	Itgb2	integrin beta 2
chr18	5802817	5803399	583	*	375	1.44422	5.52356	4.41652e-07	ATAC_KO_PBS_unique	75.8812	27.8856	Distal Intergenic	18	5731081	5772804	41724	1	21417	ENSMUST00000177030.1	71736	ENSMUSG00000024238	Zeb1	zinc finger E-box binding homeobox 1
chr15	86181607	86183284	1678	*	1121	-0.78397	7.20357	4.43173e-07	merged_common	112.329	193.415	Intron (ENSMUST00000044332.15/223753, intron 1 of 12)	15	86185728	86187152	1425	1	102638208	ENSMUST00000133675.1	-2444	ENSMUSG00000086424	Gm15569	predicted gene 15569
chr14	121961393	121963002	1610	*	600	0.92475	6.74499	4.55851e-07	merged_common	147.786	77.8495	Intron (ENSMUST00000039803.6/68889, intron 4 of 8)	14	121954987	121965105	10119	2	321019	ENSMUST00000227267.1	2103	ENSMUSG00000051212	Gpr183	G protein-coupled receptor 183
chr14	34309928	34310015	88	*	64	1.07529	6.35841	4.57285e-07	ATAC_KO_PBS_unique	119.102	56.523	Promoter	14	34237033	34310366	73334	2	75698	ENSMUST00000111917.2	351	ENSMUSG00000041471	Shld2	shieldin complex subunit 2
chr6	48433273	48434041	769	*	319	-1.14034	6.20177	4.59132e-07	merged_common	49.577	109.284	Intron (ENSMUST00000114566.7/68910, intron 4 of 4)	6	48427697	48444036	16340	2	68910	ENSMUST00000114566.7	9995	ENSMUSG00000068551	Zfp467	zinc finger protein 467
chr3	21987772	21988516	745	*	561	1.14211	6.20217	4.59132e-07	merged_common	109.382	49.5604	Distal Intergenic	3	22076652	22216594	139943	1	81004	ENSMUST00000193734.5	-88136	ENSMUSG00000027630	Tbl1xr1	transducin (beta)-like 1X-linked receptor 1
chr4	155601189	155602144	956	*	275	-0.77539	7.24184	4.6032e-07	merged_common	115.692	198.024	Promoter	4	155601416	155623340	21925	1	320541	ENSMUST00000105608.8	0	ENSMUSG00000042202	Slc35e2	solute carrier family 35, member E2
chr17	26932743	26933450	708	*	315	-0.96542	6.6189	4.69269e-07	merged_common	70.3359	137.34	Promoter	17	26933127	26937890	4764	1	21652	ENSMUST00000073724.5	0	ENSMUSG00000024193	Phf1	PHD finger protein 1
chr15	69077804	69078619	816	*	457	-0.97961	6.61102	4.69269e-07	merged_common	69.6096	137.265	Intron (ENSMUST00000022954.6/13992, intron 7 of 8)	15	68930068	69024765	94698	1	13992	ENSMUST00000230073.1	147736	ENSMUSG00000022332	Khdrbs3	KH domain containing, RNA binding, signal transduction associated 3
chr1	180921997	180922833	837	*	447	-0.96542	6.6189	4.69269e-07	merged_common	70.3359	137.34	Distal Intergenic	1	180935022	180938400	3379	1	13590	ENSMUST00000037361.8	-12189	ENSMUSG00000038793	Lefty1	left right determination factor 1
chr1	128721947	128722513	567	*	298	1.48582	5.40085	4.74408e-07	ATAC_KO_PBS_unique	70.706	25.2452	Distal Intergenic	1	128589099	128592293	3195	2	12767	ENSMUST00000142893.1	-129654	ENSMUSG00000045382	Cxcr4	chemokine (C-X-C motif) receptor 4
chr10	67695963	67696413	451	*	110	1.48582	5.40085	4.74408e-07	ATAC_KO_PBS_unique	70.706	25.2452	Distal Intergenic	10	67569216	67571959	2744	2	105245193	ENSMUST00000219796.1	-124004	NA	4930563J15Rik	RIKEN cDNA 4930563J15 gene
chr17	25272934	25274429	1496	*	698	-0.75159	7.28789	4.75396e-07	merged_common	120.434	202.768	Promoter	17	25261916	25274310	12395	2	22196	ENSMUST00000049911.15	0	ENSMUSG00000015120	Ube2i	ubiquitin-conjugating enzyme E2I
chr9	52195917	52196302	386	*	148	1.70182	5.08496	4.79401e-07	ATAC_KO_PBS_unique	61.2174	18.8181	Distal Intergenic	9	52111985	52168111	56127	2	244871	ENSMUST00000165519.1	-27806	ENSMUSG00000035164	Zc3h12c	zinc finger CCCH type containing 12C
chr5	118404343	118404802	460	*	261	1.85793	4.83886	4.80164e-07	ATAC_KO_PBS_unique	54.4864	15.0313	Distal Intergenic	5	118560679	118720114	159436	1	76199	ENSMUST00000201614.1	-155877	ENSMUSG00000018076	Med13l	mediator complex subunit 13-like
chr9	56265532	56266093	562	*	182	1.83715	4.82732	4.80164e-07	ATAC_KO_PBS_unique	53.6645	15.0193	Intron (ENSMUST00000181444.1/ENSMUST00000181444.1, intron 1 of 1)	9	56201126	56244065	42940	2	244895	ENSMUST00000188142.6	-21467	ENSMUSG00000074305	Peak1	pseudopodium-enriched atypical kinase 1
chr18	15265477	15265870	394	*	287	1.85793	4.83886	4.80164e-07	ATAC_KO_PBS_unique	54.4864	15.0313	Distal Intergenic	18	14968685	15151446	182762	2	106931	ENSMUST00000025992.6	-114031	ENSMUSG00000036225	Kctd1	potassium channel tetramerisation domain containing 1
chr15	12013956	12014717	762	*	345	1.00159	6.52237	4.83855e-07	merged_common	130.072	64.9643	Distal Intergenic	15	11984041	11996983	12943	2	20024	ENSMUST00000110504.1	-16973	ENSMUSG00000022205	Sub1	SUB1 homolog, transcriptional regulator
chr8	3353155	3353756	602	*	457	1.37086	5.67933	4.89547e-07	merged_common	82.4107	31.865	Promoter	8	3353415	3389408	35994	1	319493	ENSMUST00000208363.1	0	ENSMUSG00000074497	A430078G23Rik	RIKEN cDNA A430078G23 gene
chr13	117211141	117211910	770	*	437	0.87361	6.89629	5.07647e-07	merged_common	161.243	88.0033	Intron (ENSMUST00000225981.1/13723, intron 1 of 3)	13	117208536	117249342	40807	1	13723	ENSMUST00000225981.1	2605	ENSMUSG00000021728	Emb	embigin
chr11	102218497	102219391	895	*	498	-0.76989	7.22264	5.08163e-07	merged_common	114.38	195.034	Promoter	11	102195749	102218929	23181	2	15184	ENSMUST00000149087.7	0	ENSMUSG00000008855	Hdac5	histone deacetylase 5
chr5	23432432	23434957	2526	*	924	-0.48224	8.51021	5.08493e-07	merged_common	308.492	430.936	Promoter	5	23431810	23433919	2110	2	269630	ENSMUST00000101522.2	0	ENSMUSG00000073147	5031425E22Rik	RIKEN cDNA 5031425E22 gene
chr17	29431815	29432423	609	*	391	1.29655	5.81308	5.1319e-07	merged_common	88.1174	35.8725	Exon (ENSMUST00000234020.1/ENSMUST00000234020.1, exon 1 of 1)	17	29376501	29378452	1952	1	26382	ENSMUST00000144616.1	55314	ENSMUSG00000024013	Fgd2	FYVE, RhoGEF and PH domain containing 2
chr11	45926643	45927092	450	*	88	1.29655	5.81308	5.1319e-07	merged_common	88.1174	35.8725	Downstream (1-2kb)	11	45928269	45944935	16667	2	72290	ENSMUST00000129820.7	17843	ENSMUSG00000044847	Lsm11	U7 snRNP-specific Sm-like protein LSM11
chr2	151969423	151970183	761	*	205	-1.30227	5.80459	5.1319e-07	merged_common	35.5914	87.7742	3' UTR	2	151967529	151967617	89	2	100316704	ENSMUST00000157866.1	-1806	ENSMUSG00000088491	Mir1953	microRNA 1953
chr6	120357089	120357624	536	*	378	1.2323	5.93518	5.15733e-07	merged_common	93.7879	39.9197	Promoter	6	120324323	120357429	33107	2	67200	ENSMUST00000032283.11	0	ENSMUSG00000030177	Ccdc77	coiled-coil domain containing 77
chr16	23609526	23610347	822	*	301	1.48622	5.47564	5.16098e-07	ATAC_KO_PBS_unique	74.4784	26.5848	Promoter	16	23609919	23614222	4304	1	67775	ENSMUST00000038423.5	0	ENSMUSG00000033355	Rtp4	receptor transporter protein 4
chr4	62266162	62266320	159	*	17	2.64756	3.74593	5.23648e-07	ATAC_KO_PBS_unique	33.5842	5.35969	Intron (ENSMUST00000107468.7/20530, intron 1 of 4)	4	62262562	62297355	34794	1	20530	ENSMUST00000107468.7	3600	ENSMUSG00000066152	Slc31a2	solute carrier family 31, member 2
chr7	58697186	58697357	172	*	77	2.64756	3.74593	5.23648e-07	ATAC_KO_PBS_unique	33.5842	5.35969	Intron (ENSMUST00000168747.2/11982, intron 1 of 20)	7	58658246	58829420	171175	1	11982	ENSMUST00000168747.2	38940	ENSMUSG00000025324	Atp10a	ATPase, class V, type 10A
chr16	84606185	84606269	85	*	53	2.64756	3.74593	5.23648e-07	ATAC_KO_PBS_unique	33.5842	5.35969	Distal Intergenic	16	84703167	84715245	12079	1	100653389	ENSMUST00000185662.6	-96898	ENSMUSG00000097418	Mir155hg	Mir155 host gene (non-protein coding)
chr6	108658425	108658771	347	*	257	1.9216	4.74593	5.24575e-07	ATAC_KO_PBS_unique	52.2272	13.786	Exon (ENSMUST00000166951.1/ENSMUST00000166951.1, exon 2 of 2)	6	108660629	108666925	6297	1	20893	ENSMUST00000032194.10	-1858	ENSMUSG00000030103	Bhlhe40	basic helix-loop-helix family, member e40
chr6	128842711	128844013	1303	*	616	-0.60701	7.88259	5.37877e-07	merged_common	191.219	291.246	Exon (ENSMUST00000181825.1/ENSMUST00000181825.1, exon 1 of 2)	6	128813706	128826331	12626	2	80782	ENSMUST00000032472.10	-16380	ENSMUSG00000079298	Klrb1b	killer cell lectin-like receptor subfamily B member 1B
chr18	74882160	74882740	581	*	462	1.74897	5.00771	5.41018e-07	ATAC_KO_PBS_unique	58.9817	17.5479	Distal Intergenic	18	74939322	74961263	21942	2	16891	ENSMUST00000066532.4	78523	ENSMUSG00000053846	Lipg	lipase, endothelial
chr19	37048462	37049014	553	*	238	1.74897	5.00771	5.41018e-07	ATAC_KO_PBS_unique	58.9817	17.5479	Intron (ENSMUST00000079754.10/208922, intron 9 of 10)	19	36926079	37012752	86674	1	107182	ENSMUST00000099494.3	122383	ENSMUSG00000040565	Btaf1	B-TFIID TATA-box binding protein associated factor 1
chr10	7841422	7842551	1130	*	515	0.83396	6.99132	5.42136e-07	merged_common	169.871	95.2957	Intron (ENSMUST00000039484.5/237256, intron 2 of 5)	10	7836381	7836474	94	1	100628581	ENSMUST00000175319.1	5041	ENSMUSG00000093060	Mir5104	microRNA 5104
chr2	160225259	160226013	755	*	409	1.04958	6.34413	5.46363e-07	merged_common	116.883	56.4671	Distal Intergenic	2	160311393	160313616	2224	2	329554	ENSMUST00000109475.2	87603	ENSMUSG00000074623	Gm826	predicted gene 826
chr2	150567617	150567731	115	*	30	1.51659	5.33974	5.50067e-07	ATAC_KO_PBS_unique	68.5001	23.9416	Distal Intergenic	2	150570415	150578944	8530	1	13011	ENSMUST00000089200.2	-2684	ENSMUSG00000068129	Cst7	cystatin F (leukocystatin)
chr5	115500877	115500988	112	*	54	1.51659	5.33974	5.50067e-07	ATAC_KO_PBS_unique	68.5001	23.9416	Distal Intergenic	5	115506676	115555987	49312	1	19303	ENSMUST00000067268.14	-5688	ENSMUSG00000029528	Pxn	paxillin
chr9	85762245	85762718	474	*	277	1.53233	5.34848	5.50067e-07	ATAC_KO_PBS_unique	69.2934	23.956	Distal Intergenic	9	85687542	85749334	61793	2	108837	ENSMUST00000187521.6	-12911	ENSMUSG00000035941	Ibtk	inhibitor of Bruton agammaglobulinemia tyrosine kinase
chr17	35209847	35210494	648	*	152	1.51659	5.33974	5.50067e-07	ATAC_KO_PBS_unique	68.5001	23.9416	Distal Intergenic	17	35203165	35205351	2187	2	16992	ENSMUST00000025266.5	-4496	ENSMUSG00000024402	Lta	lymphotoxin A
chrX	14628251	14628887	637	*	538	1.53233	5.34848	5.50067e-07	ATAC_KO_PBS_unique	69.2934	23.956	Distal Intergenic	20	14211148	14211661	514	1	385328	ENSMUST00000105137.3	417103	ENSMUSG00000078346	H2al1n	H2A histone family member L1N
chrX	96144926	96145496	571	*	239	1.51659	5.33974	5.50067e-07	ATAC_KO_PBS_unique	68.5001	23.9416	Intron (ENSMUST00000117399.1/17698, intron 2 of 12)	20	96096097	96151959	55863	1	17698	ENSMUST00000135027.1	48829	ENSMUSG00000031207	Msn	moesin
chr5	142905159	142907319	2161	*	864	-0.70058	7.49052	5.50118e-07	merged_common	141.066	229.255	Promoter	5	142903115	142906754	3640	2	11461	ENSMUST00000100497.10	0	ENSMUSG00000029580	Actb	actin, beta
chr11	101972097	101972441	345	*	194	1.40461	5.56978	5.50334e-07	merged_common	77.2833	29.1915	3' UTR	11	101962458	101967015	4558	2	74499	ENSMUST00000001534.6	-5082	ENSMUSG00000001494	Sost	sclerostin
chr6	120665881	120666855	975	*	350	-1.12811	6.13222	5.67346e-07	merged_common	47.4444	103.7	Promoter	6	120666369	120724920	58552	1	330409	ENSMUST00000148346.1	0	ENSMUSG00000071226	Cecr2	CECR2, histone acetyl-lysine reader
chr3	101030625	101031298	674	*	203	1.14868	6.12144	5.67346e-07	merged_common	103.665	46.7567	Distal Intergenic	3	100993529	101029556	36028	2	630146	ENSMUST00000147399.8	-1069	ENSMUSG00000086564	Cd101	CD101 antigen
chr11	89024195	89024688	494	*	152	1.39394	5.62928	5.76941e-07	ATAC_KO_PBS_unique	80.24	30.5333	Distal Intergenic	11	88999376	89020293	20918	1	217069	ENSMUST00000107896.9	24819	ENSMUSG00000000275	Trim25	tripartite motif-containing 25
chr3	79152856	79153551	696	*	295	1.15189	6.0793	5.84105e-07	merged_common	100.793	45.3602	Intron (ENSMUST00000195708.1/76089, intron 7 of 29)	3	79062528	79145875	83348	2	76089	ENSMUST00000118340.6	-6981	ENSMUSG00000062232	Rapgef2	Rap guanine nucleotide exchange factor (GEF) 2
chr4	59009137	59010003	867	*	302	1.15189	6.0793	5.84105e-07	merged_common	100.793	45.3602	Intron (ENSMUST00000148366.7/72429, intron 2 of 3)	4	59003210	59041888	38679	1	14700	ENSMUST00000174664.1	5927	ENSMUSG00000038607	Gng10	guanine nucleotide binding protein (G protein), gamma 10
chr2	163644519	163646452	1934	*	623	-0.56664	8.04776	5.93101e-07	merged_common	217.435	322.036	Promoter	2	163623272	163645131	21860	2	26943	ENSMUST00000017851.3	0	ENSMUSG00000017707	Serinc3	serine incorporator 3
chr8	71637283	71637944	662	*	381	-1.35752	5.7047	5.96071e-07	merged_common	32.5806	83.4859	3' UTR	8	71634623	71641397	6775	2	382018	ENSMUST00000175909.7	3453	ENSMUSG00000034799	Unc13a	unc-13 homolog A
chr1	93413167	93413386	220	*	201	-2.67361	3.81468	5.96377e-07	ATAC_Control_PBS_unique	5.57076	35.5428	Intron (ENSMUST00000170883.7/110611, intron 23 of 27)	1	93401861	93403570	1710	1	404545	ENSMUST00000190340.1	11306	ENSMUSG00000034107	Ano7	anoctamin 7
chr3	88159250	88159325	76	*	56	-2.67361	3.81468	5.96377e-07	ATAC_Control_PBS_unique	5.57076	35.5428	Exon (ENSMUST00000001455.12/17261, exon 5 of 11)	3	88162960	88168785	5826	1	17261	ENSMUST00000139153.1	-3635	ENSMUSG00000001419	Mef2d	myocyte enhancer factor 2D
chr17	12307368	12308185	818	*	544	1.09047	6.25365	6.02804e-07	merged_common	111.344	52.2882	Promoter	17	12272192	12308584	36393	2	26407	ENSMUST00000233012.1	399	ENSMUSG00000014426	Map3k4	mitogen-activated protein kinase kinase kinase 4
chr17	50469916	50471042	1127	*	689	1.09047	6.25365	6.02804e-07	merged_common	111.344	52.2882	Distal Intergenic	17	50509403	50688484	179082	1	224860	ENSMUST00000043938.7	-38361	ENSMUSG00000038910	Plcl2	phospholipase C-like 2
chr10	25331355	25332082	728	*	518	1.20548	5.96961	6.07757e-07	merged_common	95.1644	41.2657	Distal Intergenic	10	25284024	25307870	23847	2	432442	ENSMUST00000176231.1	-23485	ENSMUSG00000039166	Akap7	A kinase (PRKA) anchor protein 7
chr16	7559038	7559663	626	*	264	1.316	5.76764	6.08115e-07	merged_common	85.9628	34.5267	Distal Intergenic	16	7352970	7409969	57000	1	268859	ENSMUST00000231031.1	206068	ENSMUSG00000008658	Rbfox1	RNA binding protein, fox-1 homolog (C. elegans) 1
chr3	58516513	58517235	723	*	347	1.24896	5.89354	6.13275e-07	ATAC_KO_PBS_unique	91.6473	38.5607	Downstream (2-3kb)	3	58525821	58557501	31681	1	229317	ENSMUST00000029387.14	-8586	ENSMUSG00000027810	Eif2a	eukaryotic translation initiation factor 2A
chr3	87515467	87516259	793	*	490	1.2603	5.89984	6.13275e-07	merged_common	92.4108	38.5776	Distal Intergenic	3	87525407	87540156	14750	1	27049	ENSMUST00000119109.7	-9148	ENSMUSG00000003382	Etv3	ets variant 3
chr13	89739218	89739832	615	*	250	1.25461	5.84413	6.1363e-07	merged_common	88.7352	37.1895	Promoter	13	89725434	89740397	14964	2	13003	ENSMUST00000162715.1	565	ENSMUSG00000021614	Vcan	versican
chr10	79926500	79928746	2247	*	474	-1.02114	6.46092	6.16886e-07	merged_common	61.8349	125.495	Promoter	10	79927043	79955018	27976	1	13496	ENSMUST00000019708.11	0	ENSMUSG00000019564	Arid3a	AT rich interactive domain 3A (BRIGHT-like)
chr11	116129816	116131412	1597	*	805	-0.73085	7.36311	6.23813e-07	merged_common	127.795	212.09	Promoter	11	116121846	116131124	9279	2	338364	ENSMUST00000106440.8	0	ENSMUSG00000054517	Trim65	tripartite motif-containing 65
chr5	111138939	111140064	1126	*	494	-1.10133	6.2047	6.29501e-07	merged_common	50.354	108.036	Intron (ENSMUST00000040111.9/209683, intron 5 of 23)	5	111225458	111229415	3958	1	209683	ENSMUST00000125470.1	-85394	ENSMUSG00000033209	Ttc28	tetratricopeptide repeat domain 28
chr16	44198993	44199704	712	*	280	1.12329	6.19172	6.29501e-07	merged_common	107.886	49.5247	5' UTR	16	44173397	44227463	54067	1	207806	ENSMUST00000169582.2	25596	ENSMUSG00000068284	Usf3	upstream transcription factor family member 3
chr14	65343041	65344465	1425	*	804	-0.57826	7.99759	6.30881e-07	merged_common	209.16	312.285	Distal Intergenic	14	65358389	65386388	28000	1	380912	ENSMUST00000224623.1	-13924	ENSMUSG00000034522	Zfp395	zinc finger protein 395
chr11	55432774	55433523	750	*	421	-0.9401	6.66321	6.36404e-07	merged_common	73.169	140.386	Distal Intergenic	11	55395421	55423183	27763	2	20692	ENSMUST00000214685.1	-9591	ENSMUSG00000018593	Sparc	secreted acidic cysteine rich glycoprotein
chr18	75479058	75479505	448	*	180	-1.55978	5.28112	6.36448e-07	merged_common	22.6467	66.7645	Intron (ENSMUST00000165559.1/269037, intron 9 of 11)	18	75514645	75522806	8162	1	100038353	ENSMUST00000181913.1	-35140	ENSMUSG00000097712	Gm10532	predicted gene 10532
chr1	62483062	62483490	429	*	176	1.56592	5.28493	6.36448e-07	ATAC_KO_PBS_unique	67.0837	22.6583	Intron (ENSMUST00000075374.9/72823, intron 20 of 22)	1	62703285	62739932	36648	1	18187	ENSMUST00000126344.1	-219795	ENSMUSG00000025969	Nrp2	neuropilin 2
chr8	72215928	72216385	458	*	156	1.56592	5.28493	6.36448e-07	ATAC_KO_PBS_unique	67.0837	22.6583	Distal Intergenic	8	72204335	72212837	8503	2	234421	ENSMUST00000211946.1	-3091	ENSMUSG00000074240	Cib3	calcium and integrin binding family member 3
chr4	101284043	101284245	203	*	52	2.0251	4.51118	6.40145e-07	ATAC_KO_PBS_unique	46.0054	11.303	Exon (ENSMUST00000153228.1/ENSMUST00000153228.1, exon 1 of 2)	4	101152367	101265282	112916	2	16451	ENSMUST00000102781.9	-18761	ENSMUSG00000028530	Jak1	Janus kinase 1
chr19	3377014	3377269	256	*	167	2.0251	4.51118	6.40145e-07	ATAC_KO_PBS_unique	46.0054	11.303	Intron (ENSMUST00000025835.4/12894, intron 14 of 18)	19	3388857	3407823	18967	1	17771	ENSMUST00000025840.15	-11588	ENSMUSG00000024905	Tesmin	testis expressed metallothionein like
chr11	110537945	110538020	76	*	29	1.62353	5.13864	6.41972e-07	ATAC_KO_PBS_unique	61.8373	20.0687	Distal Intergenic	11	110479039	110497926	18888	1	26399	ENSMUST00000133920.1	58906	ENSMUSG00000020623	Map2k6	mitogen-activated protein kinase kinase 6
chr17	51221158	51221705	548	*	98	1.62353	5.13864	6.41972e-07	ATAC_KO_PBS_unique	61.8373	20.0687	Distal Intergenic	17	50797727	51179352	381626	2	72238	ENSMUST00000225252.1	-41806	ENSMUSG00000023923	Tbc1d5	TBC1 domain family, member 5
chr1	193242338	193242596	259	*	195	2.52711	3.97126	6.44883e-07	ATAC_KO_PBS_unique	37.6562	6.53282	Promoter	1	193221634	193242629	20996	2	15483	ENSMUST00000016338.14	33	ENSMUSG00000016194	Hsd11b1	hydroxysteroid 11-beta dehydrogenase 1
chr10	120674342	120675026	685	*	209	1.43003	5.51568	6.45491e-07	ATAC_KO_PBS_unique	75.0976	27.8705	Intron (ENSMUST00000219150.1/ENSMUST00000219150.1, intron 1 of 2)	10	120765732	120774481	8750	1	70874	ENSMUST00000219219.1	-90706	ENSMUSG00000044544	4921513I03Rik	RIKEN cDNA 4921513I03 gene
chr4	10964666	10965680	1015	*	441	0.91815	6.71392	6.47589e-07	merged_common	144.307	76.3653	Distal Intergenic	4	10988662	11007676	19015	2	71801	ENSMUST00000054776.3	41996	ENSMUSG00000049969	Plekhf2	pleckstrin homology domain containing, family F (with FYVE domain) member 2
chr9	58581799	58583190	1392	*	460	-0.59921	7.87905	6.4947e-07	merged_common	191.267	289.748	Promoter	9	58582240	58651318	69079	1	20320	ENSMUST00000177292.7	0	ENSMUSG00000032336	Nptn	neuroplastin
chr5	90412994	90414005	1012	*	310	-1.07567	6.31057	6.52878e-07	merged_common	54.6722	115.233	Distal Intergenic	5	90367204	90368487	1284	1	791294	ENSMUST00000068250.3	45790	ENSMUSG00000054945	Gm9958	predicted gene 9958
chr3	95985029	95986259	1231	*	411	-1.07567	6.31057	6.52878e-07	merged_common	54.6722	115.233	Downstream (2-3kb)	3	95988819	95995668	6850	2	67220	ENSMUST00000123006.7	9409	ENSMUSG00000015745	Plekho1	pleckstrin homology domain containing, family O member 1
chr7	44929178	44930235	1058	*	523	-0.4253	8.83501	6.60398e-07	merged_common	394.084	529.197	Promoter	7	44900373	44929496	29124	2	11771	ENSMUST00000166972.8	0	ENSMUSG00000060279	Ap2a1	adaptor-related protein complex 2, alpha 1 subunit
chr4	10952332	10952738	407	*	333	2.11514	4.39232	6.64211e-07	ATAC_KO_PBS_unique	43.71	10.0893	Distal Intergenic	4	10988662	11007676	19015	2	71801	ENSMUST00000054776.3	54938	ENSMUSG00000049969	Plekhf2	pleckstrin homology domain containing, family F (with FYVE domain) member 2
chr7	19939913	19940113	201	*	108	2.11514	4.39232	6.64211e-07	ATAC_KO_PBS_unique	43.71	10.0893	Intron (ENSMUST00000208974.1/70080, intron 4 of 5)	7	19938182	19944898	6717	2	70080	ENSMUST00000208210.1	4785	ENSMUSG00000040498	Igsf23	immunoglobulin superfamily, member 23
chr17	29111396	29111651	256	*	173	2.11514	4.39232	6.64211e-07	ATAC_KO_PBS_unique	43.71	10.0893	Distal Intergenic	17	29114145	29148980	34836	1	442827	ENSMUST00000233717.1	-2494	ENSMUSG00000064147	Rab44	RAB44, member RAS oncogene family
chr19	37177999	37178143	145	*	63	2.11514	4.39232	6.64211e-07	ATAC_KO_PBS_unique	43.71	10.0893	Promoter	19	37174437	37178017	3581	2	208922	ENSMUST00000133988.1	0	ENSMUSG00000039652	Cpeb3	cytoplasmic polyadenylation element binding protein 3
chr8	77442513	77442743	231	*	131	2.37419	4.13339	6.70306e-07	ATAC_KO_PBS_unique	39.96	7.70767	Intron (ENSMUST00000076316.5/78514, intron 3 of 22)	8	77517056	77518579	1524	1	70345	ENSMUST00000184762.1	-74313	ENSMUSG00000097882	0610038B21Rik	RIKEN cDNA 0610038B21 gene
chr7	63929860	63929953	94	*	71	2.24793	4.27729	6.75529e-07	ATAC_KO_PBS_unique	42.261	8.89704	Intron (ENSMUST00000063694.9/50794, intron 1 of 1)	7	63891400	63924870	33471	2	50794	ENSMUST00000183817.1	-4990	ENSMUSG00000052040	Klf13	Kruppel-like factor 13
chr16	11012012	11012268	257	*	210	-2.23418	4.28493	6.75529e-07	ATAC_Control_PBS_unique	8.987	42.2834	Intron (ENSMUST00000180624.1/100043147, intron 2 of 2)	16	11008898	11015186	6289	1	100043147	ENSMUST00000180624.1	3114	ENSMUSG00000097056	Gm4262	predicted gene 4262
chr1	176927404	176927819	416	*	322	-1.73804	4.90126	6.77959e-07	ATAC_Control_PBS_unique	16.3616	54.5792	Intron (ENSMUST00000133305.7/76816, intron 14 of 16)	1	176998009	177020437	22429	1	76816	ENSMUST00000139589.1	-70190	ENSMUSG00000026504	Sdccag8	serologically defined colon cancer antigen 8
chr5	53337640	53338113	474	*	281	1.76078	4.90368	6.77959e-07	ATAC_KO_PBS_unique	55.1034	16.2604	Distal Intergenic	5	53277118	53278026	909	1	66278	ENSMUST00000204089.1	60522	ENSMUSG00000061461	Smim20	small integral membrane protein 20
chr10	10287408	10287811	404	*	272	1.76078	4.90368	6.77959e-07	ATAC_KO_PBS_unique	55.1034	16.2604	Intron (ENSMUST00000218424.1/ENSMUST00000218424.1, intron 1 of 2)	10	10335709	10411744	76036	2	215772	ENSMUST00000148816.7	123933	ENSMUSG00000050994	Adgb	androglobin
chr16	44778498	44779173	676	*	436	1.76078	4.90368	6.77959e-07	ATAC_KO_PBS_unique	55.1034	16.2604	Intron (ENSMUST00000057488.14/57781, intron 1 of 6)	16	44765826	44794344	28519	1	57781	ENSMUST00000134625.1	12672	ENSMUSG00000022667	Cd200r1	CD200 receptor 1
chrX	93863322	93863874	553	*	270	1.76078	4.90368	6.77959e-07	ATAC_KO_PBS_unique	55.1034	16.2604	Distal Intergenic	20	93764607	93832201	67595	2	236900	ENSMUST00000045748.6	-31121	ENSMUSG00000035232	Pdk3	pyruvate dehydrogenase kinase, isoenzyme 3
chr5	121835900	121838156	2257	*	894	-0.53488	8.18316	6.79188e-07	merged_common	241.473	349.852	Promoter	5	121815488	121836825	21338	2	16923	ENSMUST00000136960.7	0	ENSMUSG00000042594	Sh2b3	SH2B adaptor protein 3
chr3	14832687	14833151	465	*	312	1.35357	5.60686	6.79451e-07	merged_common	77.9051	30.486	Distal Intergenic	3	14770210	14808368	38159	2	12346	ENSMUST00000144327.2	-24319	ENSMUSG00000027556	Car1	carbonic anhydrase 1
chr11	118008428	118008593	166	*	76	-1.36255	5.60473	6.79451e-07	ATAC_Control_PBS_unique	30.3464	78.0326	Intron (ENSMUST00000132676.7/74451, intron 7 of 9)	11	118012343	118024011	11669	1	74451	ENSMUST00000155507.1	-3750	ENSMUSG00000017715	Pgs1	phosphatidylglycerophosphate synthase 1
chr9	108305704	108307064	1361	*	503	-0.55213	8.09838	6.85747e-07	merged_common	226.335	331.863	Promoter	9	108302958	108305990	3033	2	102791	ENSMUST00000044725.8	0	ENSMUSG00000039461	Tcta	T cell leukemia translocation altered gene
chr2	91096287	91097711	1425	*	473	-0.83611	6.98298	6.9557e-07	merged_common	94.6759	169.018	Promoter	2	91096780	91113315	16536	1	20375	ENSMUST00000132741.2	0	ENSMUSG00000002111	Spi1	spleen focus forming virus (SFFV) proviral integration oncogene
chr17	34639299	34640262	964	*	380	1.17598	6.04753	6.96676e-07	merged_common	99.4239	44.0033	Distal Intergenic	17	34644764	34646324	1561	1	56299	ENSMUST00000036720.8	-4502	ENSMUSG00000033739	Fkbpl	FK506 binding protein-like
chr9	65535229	65535791	563	*	119	1.16555	6.04174	6.96676e-07	merged_common	98.6683	43.9858	Distal Intergenic	9	65557002	65562164	5163	2	102595	ENSMUST00000213652.1	26373	ENSMUSG00000050721	Plekho2	pleckstrin homology domain containing, family O member 2
chr11	51921254	51922186	933	*	664	1.03963	6.37462	6.97754e-07	merged_common	118.968	57.8725	Distal Intergenic	11	51967661	51977334	9674	1	52626	ENSMUST00000102763.4	-45475	ENSMUSG00000020392	Cdkn2aipnl	CDKN2A interacting protein N-terminal like
chr8	4779303	4779736	434	*	298	1.47046	5.39232	7.01729e-07	merged_common	69.916	25.2304	Promoter	8	4735976	4779554	43579	2	20419	ENSMUST00000022945.8	0	ENSMUSG00000022322	Shcbp1	Shc SH2-domain binding protein 1
chr4	139232897	139233435	539	*	273	1.34488	5.6649	7.0426e-07	ATAC_KO_PBS_unique	80.8592	31.8332	Promoter	4	139233383	139291783	58401	1	12345	ENSMUST00000042675.8	0	ENSMUSG00000028745	Capzb	capping protein (actin filament) muscle Z-line, beta
chr9	40581793	40582293	501	*	388	1.34488	5.6649	7.0426e-07	merged_common	80.8592	31.8332	Distal Intergenic	9	40293239	40531383	238145	2	235283	ENSMUST00000119373.8	-50410	ENSMUSG00000040111	Gramd1b	GRAM domain containing 1B
chr2	26331063	26331656	594	*	218	-1.21409	5.98361	7.12441e-07	merged_common	41.5439	96.3795	Promoter	2	26330434	26340531	10098	1	67839	ENSMUST00000127453.1	629	ENSMUSG00000026930	Gpsm1	G-protein signalling modulator 1 (AGS3-like, C. elegans)
chr17	84100252	84101169	918	*	568	-0.97557	6.53506	7.18452e-07	merged_common	66.1319	130.043	Distal Intergenic	17	84078660	84089875	11216	1	74473	ENSMUST00000234076.1	21592	ENSMUSG00000117571	4933433H22Rik	RIKEN cDNA 4933433H22 gene
chrX	52987919	52988677	759	*	206	0.97016	6.53665	7.18452e-07	merged_common	129.943	66.3291	Promoter	20	52988137	53021659	33523	1	15452	ENSMUST00000026723.8	0	ENSMUSG00000025630	Hprt	hypoxanthine guanine phosphoribosyl transferase
chr12	98269473	98270208	736	*	397	1.29126	5.7539	7.20357e-07	merged_common	84.421	34.4939	Promoter	12	98268635	98276644	8010	1	14744	ENSMUST00000075072.5	838	ENSMUSG00000021886	Gpr65	G-protein coupled receptor 65
chr10	69320534	69321063	530	*	448	1.28458	5.80643	7.28398e-07	ATAC_KO_PBS_unique	87.349	35.8559	Distal Intergenic	10	69340599	69342729	2131	2	12534	ENSMUST00000123458.1	21666	ENSMUSG00000019942	Cdk1	cyclin-dependent kinase 1
chr3	149280862	149281777	916	*	715	1.2725	5.79972	7.28398e-07	merged_common	86.5805	35.8393	Distal Intergenic	3	148816093	148990555	174463	2	99633	ENSMUST00000200543.4	-290307	ENSMUSG00000028184	Adgrl2	adhesion G protein-coupled receptor L2
chr7	16923585	16925071	1487	*	693	-0.50851	8.33227	7.28572e-07	merged_common	270.225	384.416	Promoter	7	16915379	16924114	8736	2	12315	ENSMUST00000019514.9	0	ENSMUSG00000019370	Calm3	calmodulin 3
chr7	68683725	68683922	198	*	146	1.68366	5.07487	7.31086e-07	ATAC_KO_PBS_unique	60.4094	18.8049	Distal Intergenic	7	68618838	68619557	720	1	384639	ENSMUST00000187472.1	64887	NA	Gm5334	tetraspanin 7 pseudogene
chr8	27174999	27175378	380	*	264	1.66524	5.06464	7.31086e-07	ATAC_KO_PBS_unique	59.6008	18.7917	Promoter	8	27143028	27174646	31619	2	75767	ENSMUST00000209377.1	-353	ENSMUSG00000031488	Rab11fip1	RAB11 family interacting protein 1 (class I)
chr12	35824360	35824957	598	*	321	1.68366	5.07487	7.31086e-07	ATAC_KO_PBS_unique	60.4094	18.8049	Distal Intergenic	12	35925620	35949736	24117	1	403205	ENSMUST00000042101.4	-100663	ENSMUSG00000036231	Agr3	anterior gradient 3
chr13	24613539	24613733	195	*	79	1.68366	5.07487	7.31086e-07	ATAC_KO_PBS_unique	60.4094	18.8049	Promoter	13	24614610	24702162	87553	1	193385	ENSMUST00000134370.7	-877	ENSMUSG00000036006	Ripor2	RHO family interacting cell polarization regulator 2
chr8	128035475	128036296	822	*	410	-0.81351	7.03325	7.36527e-07	merged_common	98.8038	173.646	Distal Intergenic	8	128278148	128278225	78	2	102465212	ENSMUST00000184910.1	241929	ENSMUSG00000099326	Mir21c	microRNA 21c
chr6	125146743	125147298	556	*	295	-0.96344	6.58918	7.41329e-07	merged_common	68.9491	134.448	Promoter	6	125146026	125161776	15751	1	320678	ENSMUST00000135559.7	717	ENSMUSG00000038271	Iffo1	intermediate filament family orphan 1
chr12	69446146	69448833	2688	*	1980	0.95442	6.58957	7.41329e-07	merged_common	134.064	69.1837	Distal Intergenic	12	69464956	69467392	2437	2	76062	ENSMUST00000221805.1	18559	ENSMUSG00000113035	5830428M24Rik	RIKEN cDNA 5830428M24 gene
chr10	63247403	63247806	404	*	284	1.81604	4.81559	7.51561e-07	ATAC_KO_PBS_unique	52.8419	15.0071	Intron (ENSMUST00000219230.1/67345, intron 3 of 3)	10	63245822	63273567	27746	1	67345	ENSMUST00000218533.1	1581	ENSMUSG00000020064	Herc4	hect domain and RLD 4
chr13	95957106	95957534	429	*	269	1.81604	4.81559	7.51561e-07	ATAC_KO_PBS_unique	52.8419	15.0071	3' UTR	13	95961163	95984850	23688	2	75209	ENSMUST00000182180.1	27316	ENSMUSG00000051111	Sv2c	synaptic vesicle glycoprotein 2c
chr12	85541069	85541690	622	*	282	1.10419	6.18111	7.51939e-07	merged_common	106.389	49.4883	Exon (ENSMUST00000220590.1/ENSMUST00000220590.1, exon 3 of 3)	12	85599027	85639878	40852	1	81703	ENSMUST00000177587.8	-57337	ENSMUSG00000034271	Jdp2	Jun dimerization protein 2
chr10	24711523	24712448	926	*	659	1.09454	6.17575	7.51939e-07	merged_common	105.641	49.4699	Promoter	10	24637914	24712158	74245	2	18605	ENSMUST00000105520.7	0	ENSMUSG00000037370	Enpp1	ectonucleotide pyrophosphatase/phosphodiesterase 1
chr2	148869444	148869953	510	*	234	-1.4087	5.47564	7.56262e-07	ATAC_Control_PBS_unique	27.3087	72.5041	Downstream (1-2kb)	2	148846904	148865038	18135	2	77705	ENSMUST00000149457.1	-4406	ENSMUSG00000027446	Cstdc2	cystatin domain containing 2
chr3	97993662	97993835	174	*	121	2.88868	3.5222	7.61938e-07	ATAC_KO_PBS_unique	31.2664	4.22181	Distal Intergenic	3	98013527	98100659	87133	1	18129	ENSMUST00000198324.1	-19692	ENSMUSG00000027878	Notch2	notch 2
chr16	45029585	45029767	183	*	84	2.88868	3.5222	7.61938e-07	ATAC_KO_PBS_unique	31.2664	4.22181	Distal Intergenic	16	45093454	45094904	1451	1	67896	ENSMUST00000138048.7	-63687	ENSMUSG00000022665	Ccdc80	coiled-coil domain containing 80
chr4	101291937	101293653	1717	*	271	1.00254	6.49052	7.70543e-07	merged_common	127.274	63.5249	Exon (ENSMUST00000131864.1/ENSMUST00000131864.1, exon 3 of 3)	4	101152367	101265282	112916	2	16451	ENSMUST00000102781.9	-26655	ENSMUSG00000028530	Jak1	Janus kinase 1
chr2	11429358	11430044	687	*	433	0.92508	6.68989	7.7193e-07	merged_common	142.264	74.9237	Distal Intergenic	2	11338366	11398501	60136	2	77543	ENSMUST00000192626.1	-30857	ENSMUSG00000102674	8030442B05Rik	RIKEN cDNA 8030442B05 gene
chr4	53713752	53714637	886	*	330	0.92508	6.68989	7.7193e-07	merged_common	142.264	74.9237	Promoter	4	53713998	53765785	51788	1	246179	ENSMUST00000128667.7	0	ENSMUSG00000028414	Fktn	fukutin
chr4	83273380	83274210	831	*	494	0.91812	6.68602	7.7193e-07	merged_common	141.541	74.9034	Intron (ENSMUST00000102823.9/69863, intron 2 of 19)	4	83259329	83279407	20079	2	69863	ENSMUST00000148811.1	5197	ENSMUSG00000038172	Ttc39b	tetratricopeptide repeat domain 39B
chr1	137898193	137899082	890	*	328	0.90462	6.7338	7.80138e-07	merged_common	145.625	77.7888	Exon (ENSMUST00000187561.1/ENSMUST00000187561.1, exon 1 of 1)	1	137966455	137966541	87	1	735252	ENSMUST00000083631.1	-67373	ENSMUSG00000065565	Mir181a-1	microRNA 181a-1
chr15	62056096	62056769	674	*	522	1.07039	6.28112	7.80266e-07	merged_common	112.698	53.6656	Intron (ENSMUST00000182956.7/19296, intron 1 of 6)	15	62039257	62249223	209967	1	19296	ENSMUST00000183297.7	16839	ENSMUSG00000097039	Pvt1	Pvt1 oncogene
chr10	81544529	81545746	1218	*	745	-0.65064	7.6488	7.81594e-07	merged_common	160.172	251.449	Promoter	10	81528724	81545190	16467	2	14672	ENSMUST00000043604.5	0	ENSMUSG00000034781	Gna11	guanine nucleotide binding protein, alpha 11
chr14	51984012	51985238	1227	*	562	-0.87974	6.8262	7.83936e-07	merged_common	83.6521	153.924	Promoter	14	51984719	51987467	2749	1	268739	ENSMUST00000182649.7	0	ENSMUSG00000004562	Arhgef40	Rho guanine nucleotide exchange factor (GEF) 40
chr19	6363130	6364710	1581	*	499	-0.44495	8.67409	7.85908e-07	merged_common	350.098	476.577	Promoter	19	6363690	6378030	14341	1	22668	ENSMUST00000131252.7	0	ENSMUSG00000024949	Sf1	splicing factor 1
chr9	61371853	61373328	1476	*	469	-0.78519	7.13369	8.07054e-07	merged_common	106.972	184.348	Promoter	9	61372366	61418497	46132	1	21887	ENSMUST00000178113.7	0	ENSMUSG00000032280	Tle3	transducin-like enhancer of split 3
chr14	10430444	10430978	535	*	147	1.14162	6.0736	8.08145e-07	merged_common	100.038	45.3424	Intron (ENSMUST00000161302.7/14198, intron 1 of 6)	14	9550393	10421597	871205	2	14198	ENSMUST00000179394.7	-8847	ENSMUSG00000060579	Fhit	fragile histidine triad gene
chr1	88257787	88258635	849	*	589	-1.49508	5.34544	8.16229e-07	ATAC_Control_PBS_unique	24.2162	68.2605	Promoter	1	88257758	88260169	2412	1	100040766	ENSMUST00000135948.1	29	ENSMUSG00000079429	Mroh2a	maestro heat-like repeat family member 2A
chr12	35319371	35320057	687	*	427	1.50066	5.33089	8.16229e-07	ATAC_KO_PBS_unique	67.7064	23.9269	Distal Intergenic	12	35194811	35194897	87	2	751520	ENSMUST00000102298.1	-124474	ENSMUSG00000076253	Mir680-3	microRNA 680-3
chr16	90677100	90677587	488	*	312	1.50066	5.33089	8.16229e-07	ATAC_KO_PBS_unique	67.7064	23.9269	Distal Intergenic	16	90721447	90727139	5693	2	66578	ENSMUST00000147546.1	49552	ENSMUSG00000022978	Mis18a	MIS18 kinetochore protein A
chr1	164136039	164136243	205	*	114	1.87757	4.72147	8.26603e-07	ATAC_KO_PBS_unique	50.5716	13.7626	Intron (ENSMUST00000162746.1/20344, intron 8 of 15)	1	164141318	164142792	1475	1	20344	ENSMUST00000160000.1	-5075	ENSMUSG00000026580	Selp	selectin, platelet
chr2	11300432	11300947	516	*	163	1.87757	4.72147	8.26603e-07	ATAC_KO_PBS_unique	50.5716	13.7626	3' UTR	2	11339488	11344111	4624	1	100503147	ENSMUST00000131188.2	-38541	ENSMUSG00000086006	Gm13293	predicted gene 13293
chr4	141271924	141272148	225	*	81	1.87757	4.72147	8.26603e-07	ATAC_KO_PBS_unique	50.5716	13.7626	Distal Intergenic	4	141278439	141279794	1356	1	100503810	ENSMUST00000142429.1	-6291	ENSMUSG00000085395	Gm13056	predicted gene 13056
chr5	122602199	122602536	338	*	177	1.87757	4.72147	8.26603e-07	ATAC_KO_PBS_unique	50.5716	13.7626	Promoter	5	122591208	122603493	12286	2	12589	ENSMUST00000139590.7	957	ENSMUSG00000029469	Ift81	intraflagellar transport 81
chr6	52303477	52303768	292	*	168	1.87757	4.72147	8.26603e-07	ATAC_KO_PBS_unique	50.5716	13.7626	Distal Intergenic	6	52313498	52318378	4881	1	14028	ENSMUST00000031787.7	-9730	ENSMUSG00000005503	Evx1	even-skipped homeobox 1
chr8	35428143	35428608	466	*	195	1.87757	4.72147	8.26603e-07	ATAC_KO_PBS_unique	50.5716	13.7626	Distal Intergenic	8	35376660	35379526	2867	1	244416	ENSMUST00000211472.1	51483	ENSMUSG00000046794	Ppp1r3b	protein phosphatase 1, regulatory subunit 3B
chr15	8445838	8446697	860	*	682	1.87757	4.72147	8.26603e-07	ATAC_KO_PBS_unique	50.5716	13.7626	Distal Intergenic	15	8290617	8444463	153847	2	71175	ENSMUST00000052965.7	-1375	ENSMUSG00000022141	Nipbl	NIPBL cohesin loading factor
chr16	97756263	97756724	462	*	300	1.89977	4.7338	8.26603e-07	ATAC_KO_PBS_unique	51.3996	13.7744	Intron (ENSMUST00000019386.9/72388, intron 1 of 7)	16	97741933	97763787	21855	2	72388	ENSMUST00000019386.9	7063	ENSMUSG00000005251	Ripk4	receptor-interacting serine-threonine kinase 4
chr4	62729276	62729646	371	*	89	1.73002	4.99718	8.29093e-07	ATAC_KO_PBS_unique	58.1695	17.535	Distal Intergenic	4	62700695	62704001	3307	1	50780	ENSMUST00000153875.2	28581	ENSMUSG00000059810	Rgs3	regulator of G-protein signaling 3
chr7	68667348	68667528	181	*	88	1.73002	4.99718	8.29093e-07	ATAC_KO_PBS_unique	58.1695	17.535	Distal Intergenic	7	68618838	68619557	720	1	384639	ENSMUST00000187472.1	48510	NA	Gm5334	tetraspanin 7 pseudogene
chr17	84353365	84354534	1170	*	735	-1.16508	6.01084	8.30982e-07	merged_common	43.0607	96.5618	Intron (ENSMUST00000047524.9/240174, intron 26 of 37)	17	84191537	84368780	177244	2	240174	ENSMUST00000234547.1	14246	ENSMUSG00000024251	Thada	thyroid adenoma associated
chr6	118140905	118141680	776	*	258	1.19044	6.0091	8.30982e-07	merged_common	97.2968	42.6324	Distal Intergenic	6	118107452	118139140	31689	2	78752	ENSMUST00000049344.14	-1765	ENSMUSG00000042042	Csgalnact2	chondroitin sulfate N-acetylgalactosaminyltransferase 2
chr17	23966835	23967471	637	*	261	1.17975	6.00316	8.30982e-07	merged_common	96.5387	42.6149	Distal Intergenic	17	23972127	23973747	1621	2	30943	ENSMUST00000234145.1	6276	ENSMUSG00000024124	Prss30	protease, serine 30
chr5	20941237	20941586	350	*	152	1.38062	5.62188	8.31627e-07	ATAC_KO_PBS_unique	79.4618	30.5176	Intron (ENSMUST00000036489.9/242860, intron 1 of 7)	5	20920142	20945504	25363	2	242860	ENSMUST00000197089.1	3918	ENSMUSG00000039968	Rsbn1l	round spermatid basic protein 1-like
chr13	82949503	82949919	417	*	215	1.38062	5.62188	8.31627e-07	merged_common	79.4618	30.5176	Distal Intergenic	13	82698275	82698333	59	2	100628621	ENSMUST00000198795.1	-251170	ENSMUSG00000106655	Mir3961	microRNA 3961
chr8	80313906	80314471	566	*	176	1.38062	5.62188	8.31627e-07	merged_common	79.4618	30.5176	Distal Intergenic	8	80493781	80510542	16762	1	14934	ENSMUST00000063359.7	-179310	ENSMUSG00000051839	Gypa	glycophorin A
chr8	82383316	82383694	379	*	188	1.56792	5.19937	8.45772e-07	ATAC_KO_PBS_unique	63.2647	21.3388	Intron (ENSMUST00000209363.1/16168, intron 1 of 7)	8	82345662	82398627	52966	2	16168	ENSMUST00000210885.1	14933	ENSMUSG00000031712	Il15	interleukin 15
chr13	114834622	114834935	314	*	96	1.56792	5.19937	8.45772e-07	ATAC_KO_PBS_unique	63.2647	21.3388	3' UTR	13	114818905	114825230	6326	1	17434	ENSMUST00000164871.2	15717	ENSMUSG00000015536	Mocs2	molybdenum cofactor synthesis 2
chr14	47515105	47515510	406	*	173	1.56792	5.19937	8.45772e-07	ATAC_KO_PBS_unique	63.2647	21.3388	Intron (ENSMUST00000226395.1/78938, intron 2 of 3)	14	47507352	47531955	24604	1	78938	ENSMUST00000165714.1	7753	ENSMUSG00000037536	Fbxo34	F-box protein 34
chr18	40439514	40440017	504	*	383	1.18347	5.95738	8.49072e-07	merged_common	93.644	41.2306	Intron (ENSMUST00000091927.4/383348, intron 1 of 1)	18	40258361	40531168	272808	1	383348	ENSMUST00000091927.4	181153	ENSMUSG00000051401	Kctd16	potassium channel tetramerisation domain containing 16
chr10	127604363	127605282	920	*	337	0.79726	7.05878	8.52449e-07	merged_common	175.754	101.136	Intron (ENSMUST00000049149.14/16971, intron 6 of 88)	10	127599884	127620922	21039	2	16971	ENSMUST00000118455.1	15640	ENSMUSG00000040249	Lrp1	low density lipoprotein receptor-related protein 1
chr15	79323418	79323903	486	*	158	1.31097	5.70655	8.52998e-07	merged_common	82.2552	33.1529	Promoter	15	79311806	79323566	11761	2	53357	ENSMUST00000173109.1	0	ENSMUSG00000042632	Pla2g6	phospholipase A2, group VI
chrX	134307913	134308254	342	*	176	1.31097	5.70655	8.52998e-07	merged_common	82.2552	33.1529	Promoter	20	134308084	134362639	54556	1	102920	ENSMUST00000081064.11	0	ENSMUSG00000031262	Cenpi	centromere protein I
chr2	4457764	4458361	598	*	112	-1.08255	6.19616	8.60584e-07	merged_common	50.3837	106.701	Intron (ENSMUST00000177457.7/209630, intron 3 of 24)	2	4473194	4498103	24910	1	209630	ENSMUST00000123919.2	-14833	ENSMUSG00000026657	Frmd4a	FERM domain containing 4A
chr8	74826222	74826856	635	*	324	-1.08255	6.19616	8.60584e-07	merged_common	50.3837	106.701	Intron (ENSMUST00000127757.7/ENSMUST00000127757.7, intron 4 of 9)	8	74873173	74893506	20334	1	71597	ENSMUST00000034034.9	-46317	ENSMUSG00000031621	Isx	intestine specific homeobox
chr4	95353588	95354395	808	*	412	-1.08255	6.19616	8.60584e-07	merged_common	50.3837	106.701	Distal Intergenic	4	95557507	95926939	369433	1	75578	ENSMUST00000079223.10	-203112	ENSMUSG00000028573	Fggy	FGGY carbohydrate kinase domain containing
chr15	96466212	96466393	182	*	82	1.23752	5.88719	8.61393e-07	ATAC_KO_PBS_unique	90.8837	38.5439	Distal Intergenic	15	96413656	96460843	47188	2	72193	ENSMUST00000047835.7	-5369	ENSMUSG00000033228	Scaf11	SR-related CTD-associated factor 11
chr5	65697560	65698945	1386	*	559	-0.75046	7.22218	8.61667e-07	merged_common	115.116	193.664	Promoter	5	65605721	65698168	92448	2	71521	ENSMUST00000201948.3	0	ENSMUSG00000029202	Pds5a	PDS5 cohesin associated factor A
chr8	82874009	82874565	557	*	311	1.30369	5.7608	8.64428e-07	merged_common	85.1919	34.5103	Intron (ENSMUST00000078525.6/330812, intron 1 of 6)	8	82863814	82910729	46916	1	330812	ENSMUST00000211714.1	10195	ENSMUSG00000047747	Rnf150	ring finger protein 150
chr1	131691434	131691753	320	*	160	1.97009	4.63339	9.00786e-07	ATAC_KO_PBS_unique	49.1267	12.5389	Intron (ENSMUST00000064679.8/226421, intron 1 of 5)	1	131688766	131711830	23065	1	226421	ENSMUST00000129905.1	2668	ENSMUSG00000052688	Rab7b	RAB7B, member RAS oncogene family
chr13	113870455	113870994	540	*	161	1.97009	4.63339	9.00786e-07	ATAC_KO_PBS_unique	49.1267	12.5389	Intron (ENSMUST00000091201.6/218639, intron 1 of 4)	13	113794622	114155276	360655	1	218639	ENSMUST00000224068.1	75833	ENSMUSG00000042348	Arl15	ADP-ribosylation factor-like 15
chr19	11964955	11966243	1289	*	590	-0.41883	8.8386	9.02127e-07	merged_common	395.953	529.327	Promoter	19	11965844	11994105	28262	1	76303	ENSMUST00000025590.9	0	ENSMUSG00000024687	Osbp	oxysterol binding protein
chr1	91984624	91984842	219	*	96	2.61098	3.72561	9.13027e-07	ATAC_KO_PBS_unique	32.6973	5.35216	Exon (ENSMUST00000097644.8/208727, exon 10 of 27)	1	91955374	91975501	20128	2	208727	ENSMUST00000187308.1	-9123	ENSMUSG00000026313	Hdac4	histone deacetylase 4
chr17	11483158	11483434	277	*	80	2.61098	3.72561	9.13027e-07	ATAC_KO_PBS_unique	32.6973	5.35216	Intron (ENSMUST00000066658.12/50873, intron 5 of 6)	17	11303647	11610945	307299	1	50873	ENSMUST00000186406.1	179511	ENSMUSG00000023826	Prkn	parkin RBR E3 ubiquitin protein ligase
chr7	114414334	114416371	2038	*	844	-0.74515	7.23638	9.1814e-07	merged_common	116.469	195.22	Promoter	7	114415281	114539251	123971	1	18576	ENSMUST00000032909.8	0	ENSMUSG00000030671	Pde3b	phosphodiesterase 3B, cGMP-inhibited
chr15	99029693	99030868	1176	*	586	0.83762	6.9004	9.18328e-07	merged_common	159.699	89.362	Promoter	15	99029891	99038110	8220	1	22146	ENSMUST00000058914.9	0	ENSMUSG00000043091	Tuba1c	tubulin, alpha 1C
chr3	122983842	122985085	1244	*	760	0.8437	6.90378	9.18328e-07	merged_common	160.411	89.3831	Promoter	3	122931493	122984510	53018	2	99526	ENSMUST00000090379.6	0	ENSMUSG00000039701	Usp53	ubiquitin specific peptidase 53
chr11	94385832	94387071	1240	*	628	-0.62689	7.70615	9.27376e-07	merged_common	168.045	259.501	Intron (ENSMUST00000178136.7/76408, intron 1 of 30)	11	94364855	94392920	28066	2	76408	ENSMUST00000151124.7	5849	ENSMUSG00000020865	Abcc3	ATP-binding cassette, sub-family C (CFTR/MRP), member 3
chr5	113818322	113818765	444	*	69	-1.70485	4.95345	9.35754e-07	ATAC_Control_PBS_unique	17.1606	55.9426	3' UTR	5	113818547	113830501	11955	2	20345	ENSMUST00000100874.5	11736	ENSMUSG00000048163	Selplg	selectin, platelet (p-selectin) ligand
chr11	35841919	35842428	510	*	276	1.67143	4.96463	9.35754e-07	ATAC_KO_PBS_unique	55.7286	17.4955	Exon (ENSMUST00000018993.6/211652, exon 21 of 23)	11	35808381	35834506	26126	2	104458	ENSMUST00000018992.3	-7413	ENSMUSG00000018848	Rars	arginyl-tRNA synthetase
chr1	183147392	183147691	300	*	146	1.67143	4.96463	9.35754e-07	merged_common	55.7286	17.4955	Promoter	1	183086266	183147461	61196	2	68897	ENSMUST00000171366.6	0	ENSMUSG00000030768	Disp1	dispatched RND transporter family member 1
chrX	129749989	129750313	325	*	30	1.03112	6.36989	9.38223e-07	ATAC_KO_PBS_unique	118.23	57.8534	Promoter	20	129749976	130465834	715859	1	54004	ENSMUST00000113320.2	13	ENSMUSG00000034480	Diaph2	diaphanous related formin 2
chr10	7834349	7834945	597	*	149	1.41568	5.50771	9.40036e-07	ATAC_KO_PBS_unique	74.3134	27.8551	Intron (ENSMUST00000039484.5/237256, intron 1 of 5)	10	7836381	7836474	94	1	100628581	ENSMUST00000175319.1	-1436	ENSMUSG00000093060	Mir5104	microRNA 5104
chr10	42251128	42251635	508	*	261	1.41568	5.50771	9.40036e-07	ATAC_KO_PBS_unique	74.3134	27.8551	Intron (ENSMUST00000105502.7/56484, intron 2 of 3)	10	42197554	42258366	60813	2	56484	ENSMUST00000177542.1	6731	ENSMUSG00000048756	Foxo3	forkhead box O3
chr14	66230983	66231448	466	*	145	1.40117	5.49965	9.40036e-07	ATAC_KO_PBS_unique	73.5287	27.8396	Intron (ENSMUST00000022622.13/19229, intron 1 of 30)	14	66153258	66213552	60295	2	19229	ENSMUST00000178730.7	-17431	ENSMUSG00000059456	Ptk2b	PTK2 protein tyrosine kinase 2 beta
chr10	21678419	21678988	570	*	501	1.54959	5.27585	9.476e-07	ATAC_KO_PBS_unique	66.2866	22.644	Distal Intergenic	10	21686411	21707440	21030	1	432436	ENSMUST00000187019.6	-7423	ENSMUSG00000056716	Gm5420	predicted gene 5420
chr2	148870134	148870233	100	*	42	-1.65039	5.112	9.70787e-07	ATAC_Control_PBS_unique	19.519	61.2737	Downstream (1-2kb)	2	148846904	148865038	18135	2	77705	ENSMUST00000149457.1	-5096	ENSMUSG00000027446	Cstdc2	cystatin domain containing 2
chr14	120293032	120293113	82	*	28	-1.91785	4.58245	9.71e-07	ATAC_Control_PBS_unique	12.3251	46.5715	Intron (ENSMUST00000088419.12/105559, intron 1 of 8)	14	120297674	120430698	133025	1	105559	ENSMUST00000226800.1	-4561	ENSMUSG00000022139	Mbnl2	muscleblind like splicing factor 2
chr18	32382619	32382707	89	*	79	-1.91785	4.58245	9.71e-07	ATAC_Control_PBS_unique	12.3251	46.5715	Intron (ENSMUST00000234857.1/30948, intron 1 of 13)	18	32371527	32378278	6752	2	402767	ENSMUST00000234978.1	-4341	NA	A830052D11Rik	RIKEN cDNA A830052D11 gene
chr8	25601088	25602864	1777	*	486	-0.61474	7.78112	9.73569e-07	merged_common	177.755	272.194	Promoter	8	25601601	25677214	75614	1	234135	ENSMUST00000155861.7	0	ENSMUSG00000054823	Nsd3	nuclear receptor binding SET domain protein 3
chr17	27825879	27826632	754	*	274	1.09256	6.21523	9.81281e-07	merged_common	108.497	50.8773	Distal Intergenic	17	27753207	27820648	67442	2	224647	ENSMUST00000233131.1	-5231	ENSMUSG00000056692	Ilrun	inflammation and lipid regulator with UBA-like and NBR1-like domains
chr4	128883403	128883670	268	*	131	-1.33756	5.59337	9.81429e-07	merged_common	30.3703	76.7529	Promoter	4	128883580	128903565	19986	1	67525	ENSMUST00000147852.1	0	ENSMUSG00000041000	Trim62	tripartite motif-containing 62
chr1	54448896	54449415	520	*	88	1.33983	5.59922	9.81429e-07	ATAC_KO_PBS_unique	77.1254	30.4697	Intron (ENSMUST00000210156.1/ENSMUST00000210156.1, intron 2 of 5)	1	54396004	54438971	42968	2	98488	ENSMUST00000041638.7	-9925	ENSMUSG00000041303	Gtf3c3	general transcription factor IIIC, polypeptide 3
chr17	57112904	57113368	465	*	209	1.33983	5.59922	9.81429e-07	ATAC_KO_PBS_unique	77.1254	30.4697	Distal Intergenic	17	57092035	57105942	13908	2	100169874	ENSMUST00000233039.1	-6962	ENSMUSG00000079414	Gm11110	predicted gene 11110
chr1	162564856	162565457	602	*	331	1.33983	5.59922	9.81429e-07	merged_common	77.1254	30.4697	Distal Intergenic	1	162570515	162599084	28570	1	53330	ENSMUST00000132158.7	-5058	ENSMUSG00000026696	Vamp4	vesicle-associated membrane protein 4
chr15	59081039	59082565	1527	*	1001	-1.16861	5.98792	9.91222e-07	merged_common	42.3302	95.1561	Promoter	15	58941234	59081989	140756	2	211401	ENSMUST00000080371.7	0	ENSMUSG00000022353	Mtss1	MTSS I-BAR domain containing 1
chr4	129081431	129081975	545	*	444	1.3317	5.65757	1.00965e-06	ATAC_KO_PBS_unique	80.0828	31.8169	Intron (ENSMUST00000168461.7/75234, intron 7 of 8)	4	129078971	129085886	6916	1	75234	ENSMUST00000130803.2	2460	ENSMUSG00000028793	Rnf19b	ring finger protein 19B
chr6	37602916	37603600	685	*	128	1.3317	5.65757	1.00965e-06	merged_common	80.0828	31.8169	Distal Intergenic	6	37539681	37557508	17828	1	208665	ENSMUST00000123648.1	63235	ENSMUSG00000038641	Akr1d1	aldo-keto reductase family 1, member D1
chr17	45584030	45584585	556	*	275	-1.3188	5.65389	1.00965e-06	merged_common	31.878	79.5224	Downstream (<1kb)	17	45586218	45588741	2524	2	63959	ENSMUST00000171978.1	4156	ENSMUSG00000023942	Slc29a1	solute carrier family 29 (nucleoside transporters), member 1
chr15	55381237	55382190	954	*	649	0.89784	6.73004	1.01696e-06	merged_common	144.905	77.7688	Intron (ENSMUST00000023053.11/ENSMUST00000023053.11, intron 11 of 47)	15	55448826	55519689	70864	1	12818	ENSMUST00000125416.1	-66636	ENSMUSG00000022371	Col14a1	collagen, type XIV, alpha 1
chr9	75546912	75547514	603	*	321	1.20258	5.86778	1.02541e-06	merged_common	88.5899	38.4921	Intron (ENSMUST00000072232.8/50875, intron 1 of 9)	9	75516558	75541707	25150	2	50875	ENSMUST00000214171.1	-5205	ENSMUSG00000058587	Tmod3	tropomodulin 3
chr1	45868467	45869209	743	*	479	1.20258	5.86778	1.02541e-06	merged_common	88.5899	38.4921	Distal Intergenic	1	45822558	45823616	1059	1	73674	ENSMUST00000186651.1	45909	ENSMUSG00000025995	Wdr75	WD repeat domain 75
chr11	115208919	115209106	188	*	26	1.26605	5.73989	1.02559e-06	ATAC_KO_PBS_unique	82.8779	34.4603	Intron (ENSMUST00000061450.6/320534, intron 8 of 9)	11	115184795	115187859	3065	2	66176	ENSMUST00000127419.7	-21060	ENSMUSG00000015542	Nat9	N-acetyltransferase 9 (GCN5-related, putative)
chr11	22813552	22814463	912	*	661	1.08481	6.17034	1.02846e-06	merged_common	104.891	49.4513	Intron (ENSMUST00000189990.1/53625, intron 1 of 5)	11	22759738	22859545	99808	2	53625	ENSMUST00000189990.1	45082	ENSMUSG00000051650	B3gnt2	UDP-GlcNAc:betaGal beta-1,3-N-acetylglucosaminyltransferase 2
chr17	71299745	71301088	1344	*	351	1.26031	5.79295	1.03042e-06	merged_common	85.8119	35.8225	Intron (ENSMUST00000180743.1/ENSMUST00000180743.1, intron 3 of 3)	17	71275186	71297247	22062	2	246707	ENSMUST00000233343.1	-2498	ENSMUSG00000024053	Emilin2	elastin microfibril interfacer 2
chr2	11441618	11442338	721	*	307	1.26031	5.79295	1.03042e-06	merged_common	85.8119	35.8225	Distal Intergenic	2	11481010	11482111	1102	2	170768	ENSMUST00000191726.1	39773	ENSMUSG00000026773	Pfkfb3	6-phosphofructo-2-kinase/fructose-2,6-biphosphatase 3
chr2	142610834	142611680	847	*	488	0.65928	7.55171	1.03064e-06	merged_common	235.789	149.3	Distal Intergenic	2	142618711	142648763	30053	2	16558	ENSMUST00000142078.1	37083	ENSMUSG00000038844	Kif16b	kinesin family member 16B
chr7	19933027	19933145	119	*	41	1.99989	4.49718	1.03322e-06	ATAC_KO_PBS_unique	45.1647	11.292	Distal Intergenic	7	19938182	19944898	6717	2	70080	ENSMUST00000208210.1	11753	ENSMUSG00000040498	Igsf23	immunoglobulin superfamily, member 23
chr11	110538300	110538506	207	*	107	1.99989	4.49718	1.03322e-06	ATAC_KO_PBS_unique	45.1647	11.292	Distal Intergenic	11	110479039	110497926	18888	1	26399	ENSMUST00000133920.1	59261	ENSMUSG00000020623	Map2k6	mitogen-activated protein kinase kinase 6
chr16	90282936	90283129	194	*	95	1.99989	4.49718	1.03322e-06	ATAC_KO_PBS_unique	45.1647	11.292	Intron (ENSMUST00000163419.8/224432, intron 1 of 19)	16	90228951	90284308	55358	2	224432	ENSMUST00000163419.8	1179	ENSMUSG00000022983	Scaf4	SR-related CTD-associated factor 4
chr4	6247817	6248238	422	*	166	1.45491	5.38368	1.03413e-06	ATAC_KO_PBS_unique	69.125	25.2153	Distal Intergenic	4	6265612	6275631	10020	2	13122	ENSMUST00000029905.1	27393	ENSMUSG00000028240	Cyp7a1	cytochrome P450, family 7, subfamily a, polypeptide 1
chr12	69331246	69331497	252	*	130	1.74033	4.89232	1.05036e-06	ATAC_KO_PBS_unique	54.2851	16.2476	Intron (ENSMUST00000021368.9/66244, intron 17 of 32)	12	69311568	69323652	12085	2	66244	ENSMUST00000221794.1	-7594	ENSMUSG00000020982	Nemf	nuclear export mediator factor
chr18	39010075	39010468	394	*	71	1.74033	4.89232	1.05036e-06	ATAC_KO_PBS_unique	54.2851	16.2476	Intron (ENSMUST00000148850.7/71302, intron 2 of 5)	18	38993476	39371162	377687	1	71302	ENSMUST00000155576.7	16599	ENSMUSG00000036452	Arhgap26	Rho GTPase activating protein 26
chr3	109254786	109255536	751	*	379	1.06135	6.27609	1.05593e-06	merged_common	111.954	53.6466	Distal Intergenic	3	109340653	109685698	345046	1	57257	ENSMUST00000046864.13	-85117	ENSMUSG00000033721	Vav3	vav 3 oncogene
chr12	108225531	108226336	806	*	222	-1.05869	6.28398	1.05593e-06	merged_common	53.9905	112.464	Intron (ENSMUST00000222310.1/668158, intron 1 of 5)	12	108199085	108202146	3062	1	12454	ENSMUST00000223363.1	26446	ENSMUSG00000021258	Ccnk	cyclin K
chr2	37802947	37803131	185	*	101	2.08836	4.37744	1.08242e-06	ATAC_KO_PBS_unique	42.8618	10.0789	Intron (ENSMUST00000102787.9/227801, intron 20 of 21)	2	37795169	37796616	1448	1	241324	ENSMUST00000137693.1	7778	ENSMUSG00000035403	Crb2	crumbs family member 2
chr5	20967985	20968293	309	*	138	2.08836	4.37744	1.08242e-06	ATAC_KO_PBS_unique	42.8618	10.0789	Distal Intergenic	5	20895591	20956398	60808	2	242860	ENSMUST00000196780.4	-11587	ENSMUSG00000039968	Rsbn1l	round spermatid basic protein 1-like
chr6	114831708	114832084	377	*	236	2.08836	4.37744	1.08242e-06	ATAC_KO_PBS_unique	42.8618	10.0789	Intron (ENSMUST00000032457.16/74244, intron 18 of 18)	6	114856151	114859222	3072	1	74244	ENSMUST00000182934.1	-24067	ENSMUSG00000030314	Atg7	autophagy related 7
chr1	174048311	174048572	262	*	82	2.49505	3.95345	1.08914e-06	ATAC_KO_PBS_unique	36.7832	6.52476	Distal Intergenic	1	174050375	174051313	939	1	258711	ENSMUST00000062665.3	-1803	ENSMUSG00000047048	Olfr432	olfactory receptor 432
chr10	68240710	68241540	831	*	541	0.85425	6.83621	1.10212e-06	merged_common	153.632	84.982	Intron (ENSMUST00000219238.1/71371, intron 3 of 9)	10	68096016	68278721	182706	2	71371	ENSMUST00000020106.8	37181	ENSMUSG00000019947	Arid5b	AT rich interactive domain 5B (MRF1-like)
chr1	151625341	151625994	654	*	295	1.4422	5.45119	1.10414e-06	merged_common	72.1181	26.5399	Intron (ENSMUST00000134499.7/63913, intron 2 of 4)	1	151677167	151719342	42176	1	63913	ENSMUST00000086267.5	-51173	ENSMUSG00000026483	Fam129a	family with sequence similarity 129, member A
chr2	155404723	155405162	440	*	124	1.4422	5.45119	1.10414e-06	merged_common	72.1181	26.5399	Intron (ENSMUST00000043126.11/56406, intron 10 of 13)	2	155390669	155403561	12893	2	56406	ENSMUST00000146942.7	-1162	ENSMUSG00000038369	Ncoa6	nuclear receptor coactivator 6
chr4	9122686	9123161	476	*	202	1.64656	5.05426	1.11051e-06	ATAC_KO_PBS_unique	58.7917	18.7781	Distal Intergenic	4	9269293	9282272	12980	1	74438	ENSMUST00000147285.1	-146132	ENSMUSG00000041216	Clvs1	clavesin 1
chr13	107700321	107701007	687	*	76	1.64656	5.05426	1.11051e-06	ATAC_KO_PBS_unique	58.7917	18.7781	Distal Intergenic	13	107687397	107692173	4777	1	72257	ENSMUST00000188490.1	12924	ENSMUSG00000102000	1700006H21Rik	RIKEN cDNA 1700006H21 gene
chr2	46371764	46371942	179	*	54	2.22001	4.26178	1.11264e-06	ATAC_KO_PBS_unique	41.4065	8.88748	Distal Intergenic	2	45696800	45698067	1268	1	69405	ENSMUST00000134308.1	674964	ENSMUSG00000086202	1700019E08Rik	RIKEN cDNA 1700019E08 gene
chr2	119262923	119263269	347	*	264	2.22001	4.26178	1.11264e-06	ATAC_KO_PBS_unique	41.4065	8.88748	Distal Intergenic	2	119269201	119271272	2072	2	228543	ENSMUST00000037360.7	8003	ENSMUSG00000034226	Rhov	ras homolog family member V
chr5	136503798	136504031	234	*	170	2.19147	4.24593	1.11264e-06	ATAC_KO_PBS_unique	40.551	8.87776	Intron (ENSMUST00000176216.8/13047, intron 1 of 22)	5	136274486	136565432	290947	2	13047	ENSMUST00000176172.7	61401	ENSMUSG00000029705	Cux1	cut-like homeobox 1
chr12	21129542	21129757	216	*	141	2.19147	4.24593	1.11264e-06	ATAC_KO_PBS_unique	40.551	8.87776	Intron (ENSMUST00000174530.1/211914, intron 6 of 9)	12	21111954	21268179	156226	1	211914	ENSMUST00000050990.9	17588	ENSMUSG00000052632	Asap2	ArfGAP with SH3 domain, ankyrin repeat and PH domain 2
chr6	113677363	113677892	530	*	209	1.13128	6.06785	1.11468e-06	merged_common	99.284	45.3242	Exon (ENSMUST00000203466.1/ENSMUST00000203466.1, exon 1 of 1)	6	113669778	113693798	24021	1	108960	ENSMUST00000113024.2	7585	ENSMUSG00000060477	Irak2	interleukin-1 receptor-associated kinase 2
chr11	29130402	29131026	625	*	333	1.13128	6.06785	1.11468e-06	merged_common	99.284	45.3242	Promoter	11	29130744	29161680	30937	1	71701	ENSMUST00000154924.7	0	ENSMUSG00000020464	Pnpt1	polyribonucleotide nucleotidyltransferase 1
chr8	3250872	3251755	884	*	421	1.06275	6.23825	1.11493e-06	merged_common	109.109	52.2325	Intron (ENSMUST00000091291.4/16337, intron 2 of 20)	8	3211101	3279551	68451	2	16337	ENSMUST00000139504.1	27796	ENSMUSG00000005534	Insr	insulin receptor
chr4	95867175	95867419	245	*	105	2.34434	4.11681	1.11718e-06	ATAC_KO_PBS_unique	39.0968	7.69883	Intron (ENSMUST00000079223.10/75578, intron 14 of 15)	4	95849625	95926934	77310	1	75578	ENSMUST00000142384.1	17550	ENSMUSG00000028573	Fggy	FGGY carbohydrate kinase domain containing
chr8	88279555	88279900	346	*	268	2.34434	4.11681	1.11718e-06	ATAC_KO_PBS_unique	39.0968	7.69883	Intron (ENSMUST00000169037.8/11513, intron 1 of 27)	8	88282992	88329962	46971	1	11513	ENSMUST00000168545.7	-3092	ENSMUSG00000031659	Adcy7	adenylate cyclase 7
chr12	25431087	25431346	260	*	164	2.34434	4.11681	1.11718e-06	ATAC_KO_PBS_unique	39.0968	7.69883	Intron (ENSMUST00000221270.1/ENSMUST00000221270.1, intron 5 of 7)	12	25129174	25134931	5758	1	432641	ENSMUST00000223429.1	301913	NA	Gm17746	predicted gene, 17746
chr13	37671191	37671448	258	*	132	2.34434	4.11681	1.11718e-06	ATAC_KO_PBS_unique	39.0968	7.69883	Distal Intergenic	13	37778400	37893849	115450	1	68750	ENSMUST00000122842.7	-106952	ENSMUSG00000039087	Rreb1	ras responsive element binding protein 1
chr8	14089895	14090865	971	*	570	0.6563	7.56496	1.13677e-06	merged_common	237.718	150.833	Promoter	8	14027561	14090301	62741	2	234086	ENSMUST00000110813.4	0	ENSMUSG00000051978	Erich1	glutamate rich 1
chr13	51742242	51743292	1051	*	709	1.36249	5.54638	1.15743e-06	merged_common	74.938	29.1442	Intron (ENSMUST00000110040.8/20354, intron 2 of 16)	13	51725341	51748726	23386	2	20354	ENSMUST00000143396.1	5434	ENSMUSG00000021451	Sema4d	sema domain, immunoglobulin domain (Ig), transmembrane domain (TM) and short cytoplasmic domain, (semaphorin) 4D
chr19	36083556	36083996	441	*	146	1.36249	5.54638	1.15743e-06	merged_common	74.938	29.1442	Promoter	19	36083716	36104772	21057	1	54364	ENSMUST00000025714.7	0	ENSMUSG00000024800	Rpp30	ribonuclease P/MRP 30 subunit
chr1	36239352	36239817	466	*	273	-1.38433	5.54174	1.15743e-06	merged_common	28.8315	75.2649	Intron (ENSMUST00000046875.13/320011, intron 1 of 40)	1	36178605	36244107	65503	2	320011	ENSMUST00000174716.7	4290	ENSMUSG00000037470	Uggt1	UDP-glucose glycoprotein glucosyltransferase 1
chr7	140953925	140954436	512	*	355	1.79458	4.80367	1.17155e-06	ATAC_KO_PBS_unique	52.0188	14.9947	Intron (ENSMUST00000211129.1/80876, intron 1 of 1)	7	140949222	140955937	6716	2	80876	ENSMUST00000211129.1	1501	ENSMUSG00000060591	Ifitm2	interferon induced transmembrane protein 2
chr17	29489069	29489288	220	*	74	1.79458	4.80367	1.17155e-06	ATAC_KO_PBS_unique	52.0188	14.9947	Intron (ENSMUST00000234040.1/ENSMUST00000234040.1, intron 1 of 3)	17	29490753	29496112	5360	1	18712	ENSMUST00000024811.8	-1465	ENSMUSG00000024014	Pim1	proviral integration site 1
chr18	56934523	56935036	514	*	103	1.79458	4.80367	1.17155e-06	ATAC_KO_PBS_unique	52.0188	14.9947	Distal Intergenic	18	56761716	56925548	163833	2	320253	ENSMUST00000102912.7	-8975	ENSMUSG00000032656	March3	membrane-associated ring finger (C3HC4) 3
chr18	60625060	60625610	551	*	483	1.79458	4.80367	1.17155e-06	ATAC_KO_PBS_unique	52.0188	14.9947	Promoter	18	60593982	60624573	30592	2	104027	ENSMUST00000130044.1	-487	ENSMUSG00000043079	Synpo	synaptopodin
chr19	37048111	37048320	210	*	183	1.79458	4.80367	1.17155e-06	ATAC_KO_PBS_unique	52.0188	14.9947	Intron (ENSMUST00000079754.10/208922, intron 9 of 10)	19	36926079	37012752	86674	1	107182	ENSMUST00000099494.3	122032	ENSMUSG00000040565	Btaf1	B-TFIID TATA-box binding protein associated factor 1
chr15	90223846	90224775	930	*	320	0.72245	7.27345	1.17364e-06	merged_common	198.731	120.445	Promoter	15	90224360	90224412	53	1	102466838	ENSMUST00000183650.1	0	ENSMUSG00000099319	Mir7648	microRNA 7648
chr9	64810754	64812193	1440	*	520	-0.54123	8.09742	1.18987e-06	merged_common	227.04	330.392	Promoter	9	64811340	64919667	108328	1	102442	ENSMUST00000038890.5	0	ENSMUSG00000053641	Dennd4a	DENN/MADD domain containing 4A
chr9	64773234	64773580	347	*	157	-1.46699	5.33267	1.2066e-06	ATAC_Control_PBS_unique	24.2376	67.0035	Distal Intergenic	9	64715299	64737758	22460	2	53869	ENSMUST00000172298.7	-35476	ENSMUSG00000004771	Rab11a	RAB11A, member RAS oncogene family
chr10	10321140	10321622	483	*	128	1.48453	5.32193	1.2066e-06	ATAC_KO_PBS_unique	66.9121	23.912	Distal Intergenic	10	10335709	10411744	76036	2	215772	ENSMUST00000148816.7	90122	ENSMUSG00000050994	Adgb	androglobin
chr15	59393655	59393741	87	*	41	1.48453	5.32193	1.2066e-06	ATAC_KO_PBS_unique	66.9121	23.912	Intron (ENSMUST00000168722.2/68501, intron 2 of 4)	15	59374287	59601684	227398	1	68501	ENSMUST00000079703.10	19368	ENSMUSG00000059586	Nsmce2	NSE2/MMS21 homolog, SMC5-SMC6 complex SUMO ligase
chr7	114311195	114311708	514	*	464	-1.27809	5.70097	1.21645e-06	merged_common	33.4034	81.0093	Distal Intergenic	7	114264606	114276118	11513	2	26440	ENSMUST00000033008.9	-35077	ENSMUSG00000030751	Psma1	proteasome (prosome, macropain) subunit, alpha type 1
chr3	150610391	150611164	774	*	376	-0.98856	6.46241	1.22398e-06	merged_common	62.6017	124.215	Intron (ENSMUST00000198573.1/ENSMUST00000198573.1, intron 2 of 2)	3	151023792	151023862	71	2	100628568	ENSMUST00000175089.1	412698	ENSMUSG00000092830	Mir3963	microRNA 3963
chr17	25919230	25920797	1568	*	826	-0.40268	8.88861	1.22418e-06	merged_common	412.22	544.939	Promoter	17	25882114	25919556	37443	2	224624	ENSMUST00000166146.7	0	ENSMUSG00000025730	Rab40c	Rab40C, member RAS oncogene family
chr2	145821808	145822722	915	*	384	1.01392	6.36034	1.25807e-06	merged_common	116.752	57.8153	Promoter	2	145822150	145844818	22669	1	74030	ENSMUST00000144278.1	0	ENSMUSG00000001768	Rin2	Ras and Rab interactor 2
chr5	112256859	112257123	265	*	65	-1.67422	5.00351	1.26546e-06	ATAC_Control_PBS_unique	17.9561	57.3062	Promoter	5	112255874	112269502	13629	1	12960	ENSMUST00000112375.1	985	ENSMUSG00000029343	Crybb1	crystallin, beta B1
chr1	52166690	52166934	245	*	153	1.71078	4.98649	1.26546e-06	ATAC_KO_PBS_unique	57.3563	17.5221	Intron (ENSMUST00000114513.8/14660, intron 17 of 17)	1	52166264	52168975	2712	2	14660	ENSMUST00000136654.1	2041	ENSMUSG00000026103	Gls	glutaminase
chr1	119474561	119474993	433	*	272	1.71078	4.98649	1.26546e-06	ATAC_KO_PBS_unique	57.3563	17.5221	Intron (ENSMUST00000004565.14/64143, intron 4 of 4)	1	119472145	119478079	5935	2	64143	ENSMUST00000142945.2	3086	ENSMUSG00000004451	Ralb	v-ral simian leukemia viral oncogene B
chr1	152540473	152540906	434	*	259	1.71078	4.98649	1.26546e-06	ATAC_KO_PBS_unique	57.3563	17.5221	Intron (ENSMUST00000111859.7/19731, intron 10 of 18)	1	152557543	152592759	35217	2	19731	ENSMUST00000128251.7	51853	ENSMUSG00000026482	Rgl1	ral guanine nucleotide dissociation stimulator,-like 1
chr1	161482280	161482528	249	*	118	1.69125	4.97564	1.26546e-06	ATAC_KO_PBS_unique	56.5425	17.5089	Distal Intergenic	1	161494655	161505290	10636	1	240873	ENSMUST00000086084.1	-12127	ENSMUSG00000066755	Tnfsf18	tumor necrosis factor (ligand) superfamily, member 18
chr4	9682962	9683091	130	*	66	1.69125	4.97564	1.26546e-06	ATAC_KO_PBS_unique	56.5425	17.5089	Distal Intergenic	4	9449079	9669344	220266	2	65973	ENSMUST00000108339.7	-13618	ENSMUSG00000028207	Asph	aspartate-beta-hydroxylase
chr8	72487058	72487570	513	*	94	1.69125	4.97564	1.26546e-06	ATAC_KO_PBS_unique	56.5425	17.5089	Intron (ENSMUST00000152080.7/270066, intron 4 of 5)	8	72484574	72492217	7644	2	270066	ENSMUST00000141352.1	4647	ENSMUSG00000019731	Slc35e1	solute carrier family 35, member E1
chr16	91061537	91062088	552	*	234	1.71078	4.98649	1.26546e-06	ATAC_KO_PBS_unique	57.3563	17.5221	Intron (ENSMUST00000035689.7/74387, intron 1 of 2)	16	91053935	91069145	15211	2	74387	ENSMUST00000035689.7	7057	ENSMUSG00000039851	4932438H23Rik	RIKEN cDNA 4932438H23 gene
chr9	45095598	45095845	248	*	161	1.53282	5.17987	1.26866e-06	ATAC_KO_PBS_unique	61.6607	21.31	Intron (ENSMUST00000050020.7/270152, intron 6 of 10)	9	45102794	45107692	4899	1	270152	ENSMUST00000217074.1	-6949	ENSMUSG00000048534	Jaml	junction adhesion molecule like
chr8	122664996	122666169	1174	*	489	-0.8323	6.90689	1.27546e-06	merged_common	89.9306	160.123	Intron (ENSMUST00000127664.1/108148, intron 1 of 15)	8	122629463	122678072	48610	2	12398	ENSMUST00000006525.13	11903	ENSMUSG00000006362	Cbfa2t3	CBFA2/RUNX1 translocation partner 3
chr10	79932480	79933113	634	*	427	-1.11299	6.08088	1.28249e-06	merged_common	46.0262	99.5518	Intron (ENSMUST00000019708.11/13496, intron 3 of 8)	10	79930424	79931218	795	1	13496	ENSMUST00000131118.1	2056	ENSMUSG00000019564	Arid3a	AT rich interactive domain 3A (BRIGHT-like)
chr1	86524787	86527214	2428	*	1813	-0.55571	8.01749	1.28744e-06	merged_common	213.728	314.158	Promoter	1	86526726	86530712	3987	1	19231	ENSMUST00000045897.14	0	ENSMUSG00000026238	Ptma	prothymosin alpha
chr3	86142154	86143233	1080	*	557	0.76847	7.12607	1.28807e-06	merged_common	182.317	107.027	Promoter	3	86137940	86142702	4763	2	20091	ENSMUST00000029722.6	0	ENSMUSG00000028081	Rps3a1	ribosomal protein S3A1
chr7	104352857	104353603	747	*	555	0.93197	6.57709	1.28878e-06	merged_common	131.879	69.1235	Promoter	7	104338754	104353362	14609	2	319236	ENSMUST00000059037.14	0	ENSMUSG00000057143	Trim12c	tripartite motif-containing 12C
chr19	7039346	7041062	1717	*	847	-0.4734	8.42382	1.29526e-06	merged_common	291.453	404.647	Promoter	19	7020696	7040026	19331	2	20867	ENSMUST00000025918.7	0	ENSMUSG00000024966	Stip1	stress-induced phosphoprotein 1
chr6	83482325	83483118	794	*	321	1.39663	5.42587	1.2955e-06	ATAC_KO_PBS_unique	69.7531	26.4933	Intron (ENSMUST00000014698.9/27369, intron 4 of 6)	6	83481213	83487010	5798	2	27369	ENSMUST00000153415.1	3892	ENSMUSG00000014554	Dguok	deoxyguanosine kinase
chr18	8637821	8638443	623	*	413	1.39663	5.42587	1.2955e-06	ATAC_KO_PBS_unique	69.7531	26.4933	Distal Intergenic	18	9212163	9218136	5974	1	14370	ENSMUST00000041080.6	-573720	ENSMUSG00000036904	Fzd8	frizzled class receptor 8
chr1	51509067	51509380	314	*	199	1.39663	5.42587	1.2955e-06	merged_common	69.7531	26.4933	Exon (ENSMUST00000190169.1/100045066, exon 2 of 2)	1	51507086	51512329	5244	2	100045066	ENSMUST00000190169.1	2949	NA	Gm17767	predicted gene, 17767
chr5	114921771	114922415	645	*	358	1.39663	5.42587	1.2955e-06	merged_common	69.7531	26.4933	Promoter	5	114923240	114937912	14673	1	231655	ENSMUST00000031540.10	-825	ENSMUSG00000041827	Oasl1	2'-5' oligoadenylate synthetase-like 1
chr10	126499968	126500404	437	*	75	-1.85652	4.72972	1.29713e-06	ATAC_Control_PBS_unique	13.9429	50.4919	Distal Intergenic	10	126710282	126710391	110	2	102465224	ENSMUST00000184232.1	209987	ENSMUSG00000098756	Mir378d	microRNA 378d
chr2	75658666	75660136	1471	*	499	-0.54313	8.08224	1.32102e-06	merged_common	224.516	327.149	Promoter	2	75659261	75665839	6579	1	229279	ENSMUST00000111964.7	0	ENSMUSG00000059005	Hnrnpa3	heterogeneous nuclear ribonucleoprotein A3
chr5	92441179	92441968	790	*	498	1.0736	6.2047	1.33306e-06	merged_common	107.002	50.8403	3' UTR	5	92415540	92435219	19680	2	269113	ENSMUST00000038514.14	-5960	ENSMUSG00000034826	Nup54	nucleoporin 54
chr18	36559449	36561692	2244	*	926	-0.43043	8.68721	1.33888e-06	merged_common	355.079	478.517	Promoter	18	36559987	36583681	23695	1	108857	ENSMUST00000134146.7	0	ENSMUSG00000024483	Ankhd1	ankyrin repeat and KH domain containing 1
chr8	84219778	84220790	1013	*	506	-1.02136	6.32283	1.34073e-06	merged_common	56.1864	114.049	Exon (ENSMUST00000039480.6/212168, exon 11 of 14)	8	84208920	84209609	690	1	723960	ENSMUST00000180630.1	10858	ENSMUSG00000065541	Mir24-2	microRNA 24-2
chr9	96636667	96636752	86	*	69	2.84873	3.5	1.34972e-06	ATAC_KO_PBS_unique	30.3656	4.2153	Distal Intergenic	9	96539300	96631617	92318	2	114713	ENSMUST00000034984.7	-5050	ENSMUSG00000032413	Rasa2	RAS p21 protein activator 2
chr7	96855902	96856452	551	*	334	1.3865	5.4915	1.36397e-06	ATAC_KO_PBS_unique	72.7437	27.8239	Intron (ENSMUST00000107162.7/23966, intron 24 of 32)	7	96791433	96801549	10117	2	791381	ENSMUST00000155101.1	-54353	ENSMUSG00000053049	Gm15413	predicted gene 15413
chr13	119713158	119713813	656	*	421	1.3865	5.4915	1.36397e-06	ATAC_KO_PBS_unique	72.7437	27.8239	Intron (ENSMUST00000178142.1/245269, intron 3 of 3)	13	119690464	119708260	17797	1	208715	ENSMUST00000224188.1	22694	ENSMUSG00000093930	Hmgcs1	3-hydroxy-3-methylglutaryl-Coenzyme A synthase 1
chr17	70966025	70966687	663	*	278	-1.36993	5.49718	1.36397e-06	merged_common	28.0945	72.6124	Intron (ENSMUST00000180743.1/ENSMUST00000180743.1, intron 1 of 3)	17	70974271	70975966	1696	2	67938	ENSMUST00000137537.1	9279	ENSMUSG00000034868	Myl12b	myosin, light chain 12B, regulatory
chr6	134919851	134921275	1425	*	623	-0.64355	7.59809	1.37436e-06	merged_common	155.02	242.168	Promoter	6	134920401	134925513	5113	1	12576	ENSMUST00000003115.8	0	ENSMUSG00000003031	Cdkn1b	cyclin-dependent kinase inhibitor 1B
chr19	28989905	28990905	1001	*	472	0.82624	6.91783	1.37661e-06	merged_common	161.004	90.8056	Promoter	19	28990352	29015771	25420	1	67072	ENSMUST00000225310.1	0	ENSMUSG00000024780	Cdc37l1	cell division cycle 37-like 1
chr17	46889434	46891360	1927	*	1196	-0.73194	7.25489	1.38054e-06	merged_common	118.515	196.837	Promoter	17	46890684	46891847	1164	1	72726	ENSMUST00000040434.8	0	ENSMUSG00000036430	Tbcc	tubulin-specific chaperone C
chr5	8357165	8357742	578	*	270	1.53305	5.26666	1.40543e-06	ATAC_KO_PBS_unique	65.4892	22.6295	Intron (ENSMUST00000050166.13/11496, intron 2 of 29)	5	8072352	8367982	295631	2	11496	ENSMUST00000050166.13	10240	ENSMUSG00000040537	Adam22	a disintegrin and metallopeptidase domain 22
chr5	146798072	146798707	636	*	118	1.51629	5.25736	1.40543e-06	ATAC_KO_PBS_unique	64.6915	22.6151	Intron (ENSMUST00000197536.1/ENSMUST00000197536.1, intron 1 of 1)	5	146734809	146795006	60198	2	22217	ENSMUST00000085614.5	-3066	ENSMUSG00000029640	Usp12	ubiquitin specific peptidase 12
chr18	65683682	65684289	608	*	231	1.51629	5.25736	1.40543e-06	ATAC_KO_PBS_unique	64.6915	22.6151	Intron (ENSMUST00000049016.11/328977, intron 4 of 5)	18	65698268	65751537	53270	1	319888	ENSMUST00000115097.7	-13979	ENSMUSG00000046610	Oacyl	O-acyltransferase like
chr1	88225450	88226927	1478	*	1241	-1.18036	5.91684	1.41053e-06	ATAC_Control_PBS_unique	40.1314	90.9511	Promoter	1	88226986	88233461	6476	1	100040766	ENSMUST00000148474.1	-59	ENSMUSG00000079429	Mroh2a	maestro heat-like repeat family member 2A
chr10	68124844	68125425	582	*	446	1.18713	5.91009	1.41053e-06	merged_common	90.7393	39.8505	Intron (ENSMUST00000219238.1/71371, intron 7 of 9)	10	68096454	68136626	40173	2	71371	ENSMUST00000218532.1	11201	ENSMUSG00000019947	Arid5b	AT rich interactive domain 5B (MRF1-like)
chr18	68929385	68929967	583	*	268	1.32594	5.59151	1.41252e-06	merged_common	76.346	30.4536	Distal Intergenic	18	68944633	68950141	5509	2	78931	ENSMUST00000025428.5	20174	ENSMUSG00000024546	4930546C10Rik	RIKEN cDNA 4930546C10 gene
chr1	72942359	72942618	260	*	205	1.94669	4.6204	1.42382e-06	ATAC_KO_PBS_unique	48.2931	12.5277	Distal Intergenic	1	72857932	72874884	16953	2	16011	ENSMUST00000027377.8	-67475	ENSMUSG00000026185	Igfbp5	insulin-like growth factor binding protein 5
chr4	54979949	54980491	543	*	303	1.94669	4.6204	1.42382e-06	ATAC_KO_PBS_unique	48.2931	12.5277	Intron (ENSMUST00000133895.7/242466, intron 1 of 2)	4	55011366	55081358	69993	1	242466	ENSMUST00000030131.11	-30875	ENSMUSG00000060206	Zfp462	zinc finger protein 462
chr4	82513134	82513455	322	*	43	1.94669	4.6204	1.42382e-06	ATAC_KO_PBS_unique	48.2931	12.5277	Intron (ENSMUST00000139835.1/102635783, intron 1 of 1)	4	82508016	82547292	39277	1	102635783	ENSMUST00000139835.1	5118	NA	Gm11266	predicted gene 11266
chr7	129759821	129760127	307	*	210	1.94669	4.6204	1.42382e-06	ATAC_KO_PBS_unique	48.2931	12.5277	Distal Intergenic	7	129629033	129633671	4639	1	207425	ENSMUST00000136560.2	130788	ENSMUSG00000042055	Wdr11	WD repeat domain 11
chrX	100494022	100494797	776	*	264	1.05223	6.27103	1.42487e-06	merged_common	111.21	53.628	Promoter	20	100494291	100516125	21835	1	18518	ENSMUST00000033570.5	0	ENSMUSG00000031221	Igbp1	immunoglobulin (CD79A) binding protein 1
chr1	43933408	43934614	1207	*	526	-0.48092	8.38403	1.42928e-06	merged_common	282.787	394.666	Promoter	1	43933647	43949405	15759	1	22019	ENSMUST00000185579.6	0	ENSMUSG00000041763	Tpp2	tripeptidyl peptidase II
chr16	25052687	25053576	890	*	443	0.90363	6.6496	1.43498e-06	merged_common	137.322	73.4039	Distal Intergenic	16	25059639	25069058	9420	1	319487	ENSMUST00000181655.1	-6063	ENSMUSG00000096960	A230028O05Rik	RIKEN cDNA A230028O05 gene
chr11	16507551	16508699	1149	*	686	0.89639	6.64559	1.43498e-06	merged_common	136.597	73.3841	Promoter	11	16500530	16508484	7955	2	20335	ENSMUST00000109643.7	0	ENSMUSG00000078974	Sec61g	SEC61, gamma subunit
chr9	114672784	114673183	400	*	331	1.65129	4.95345	1.43568e-06	ATAC_KO_PBS_unique	54.9137	17.4821	Distal Intergenic	9	114688790	114706671	17882	1	235661	ENSMUST00000215345.1	-15607	ENSMUSG00000032435	Dync1li1	dynein cytoplasmic 1 light intermediate chain 1
chr10	82958290	82958791	502	*	236	1.65129	4.95345	1.43568e-06	ATAC_KO_PBS_unique	54.9137	17.4821	Distal Intergenic	10	82985498	83195900	210403	1	58250	ENSMUST00000040110.7	-26707	ENSMUSG00000034612	Chst11	carbohydrate sulfotransferase 11
chr1	51789256	51789682	427	*	258	1.19072	5.86119	1.43719e-06	merged_common	87.8244	38.4745	Intron (ENSMUST00000046390.13/17912, intron 13 of 29)	1	51776393	51795225	18833	2	17912	ENSMUST00000136701.1	5543	ENSMUSG00000018417	Myo1b	myosin IB
chr17	29094393	29096152	1760	*	1167	0.87116	6.74216	1.44177e-06	merged_common	144.782	79.1534	Promoter	17	29093781	29100727	6947	1	12575	ENSMUST00000233296.1	612	ENSMUSG00000023067	Cdkn1a	cyclin-dependent kinase inhibitor 1A (P21)
chr1	91041601	91041980	380	*	184	1.31838	5.65018	1.44235e-06	ATAC_KO_PBS_unique	79.3067	31.8008	Intron (ENSMUST00000189505.6/16978, intron 1 of 12)	1	91053444	91128944	75501	1	16978	ENSMUST00000068167.12	-11464	ENSMUSG00000026305	Lrrfip1	leucine rich repeat (in FLII) interacting protein 1
chr13	62880280	62880836	557	*	134	1.30493	5.6427	1.44235e-06	ATAC_KO_PBS_unique	78.5296	31.7841	Intron (ENSMUST00000092888.10/14121, intron 1 of 6)	13	62872719	62888127	15409	2	14121	ENSMUST00000134814.1	7291	ENSMUSG00000069805	Fbp1	fructose bisphosphatase 1
chr2	167860349	167861037	689	*	378	1.248	5.78611	1.45272e-06	merged_common	85.0424	35.8055	Intron (ENSMUST00000142937.1/ENSMUST00000142937.1, intron 1 of 1)	2	167932057	167974737	42681	1	19246	ENSMUST00000147210.7	-71020	ENSMUSG00000027540	Ptpn1	protein tyrosine phosphatase, non-receptor type 1
chr7	142364149	142367214	3066	*	612	-1.22775	5.80019	1.45272e-06	merged_common	36.4113	85.2758	Intron (ENSMUST00000059223.14/320802, intron 2 of 3)	7	142355508	142372259	16752	2	320802	ENSMUST00000084412.5	5045	ENSMUSG00000045777	Ifitm10	interferon induced transmembrane protein 10
chr5	113815672	113816203	532	*	276	-1.27066	5.7292	1.45511e-06	merged_common	34.1513	82.3976	Downstream (2-3kb)	5	113818547	113830501	11955	2	20345	ENSMUST00000100874.5	14298	ENSMUSG00000048163	Selplg	selectin, platelet (p-selectin) ligand
chr18	81585051	81585619	569	*	342	1.25325	5.73278	1.45511e-06	merged_common	82.1054	34.4434	Distal Intergenic	18	81992010	81992080	71	2	100628596	ENSMUST00000175295.1	406461	ENSMUSG00000093036	Mir5127	microRNA 5127
chr7	104400557	104401117	561	*	159	1.25325	5.73278	1.45511e-06	merged_common	82.1054	34.4434	5' UTR	7	104411685	104412267	583	2	20128	ENSMUST00000142124.1	11150	ENSMUSG00000030921	Trim30a	tripartite motif-containing 30A
chr5	112256519	112256754	236	*	22	-1.61957	5.09799	1.46217e-06	ATAC_Control_PBS_unique	19.5379	60.0368	Promoter	5	112255874	112269502	13629	1	12960	ENSMUST00000112375.1	645	ENSMUSG00000029343	Crybb1	crystallin, beta B1
chr12	25492607	25493206	600	*	386	1.58745	5.1186	1.46217e-06	ATAC_KO_PBS_unique	60.2264	20.0409	Distal Intergenic	12	25129174	25134931	5758	1	432641	ENSMUST00000223429.1	363433	NA	Gm17746	predicted gene, 17746
chr16	22435987	22436444	458	*	244	1.58745	5.1186	1.46217e-06	ATAC_KO_PBS_unique	60.2264	20.0409	Promoter	16	22381316	22436514	55199	2	104156	ENSMUST00000168774.7	70	ENSMUSG00000013089	Etv5	ets variant 5
chr18	61447852	61448879	1028	*	485	0.97073	6.43979	1.4622e-06	merged_common	121.529	62.0098	Distal Intergenic	18	61298136	61400431	102296	2	170826	ENSMUST00000075299.12	-47421	ENSMUSG00000033871	Ppargc1b	peroxisome proliferative activated receptor, gamma, coactivator 1 beta
chr4	48044235	48045563	1329	*	830	0.97073	6.43979	1.4622e-06	merged_common	121.529	62.0098	Promoter	4	48045153	48086445	41293	1	18124	ENSMUST00000030025.9	0	ENSMUSG00000028341	Nr4a3	nuclear receptor subfamily 4, group A, member 3
chr13	97169325	97172121	2797	*	339	-1.06137	6.22689	1.50966e-06	merged_common	51.8476	108.201	Promoter	13	97171449	97177486	6038	1	320806	ENSMUST00000159321.1	0	ENSMUSG00000021666	Gfm2	G elongation factor, mitochondrial 2
chr6	97457093	97458325	1233	*	1056	1.05337	6.23304	1.50966e-06	merged_common	108.363	52.2137	Promoter	6	97287088	97459286	172199	2	232288	ENSMUST00000113359.7	961	ENSMUSG00000030064	Frmd4b	FERM domain containing 4B
chr10	13987985	13988767	783	*	475	1.05337	6.23304	1.50966e-06	merged_common	108.363	52.2137	Intron (ENSMUST00000187083.6/15273, intron 1 of 12)	10	13967024	14079675	112652	1	15273	ENSMUST00000191464.1	20961	ENSMUSG00000015501	Hivep2	human immunodeficiency virus type I enhancer binding protein 2
chr6	17652777	17652951	175	*	67	1.42323	5.36608	1.51819e-06	ATAC_KO_PBS_unique	67.5412	25.1845	Intron (ENSMUST00000148694.7/12343, intron 4 of 5)	6	17660606	17665686	5081	1	12343	ENSMUST00000142592.1	-7655	ENSMUSG00000015733	Capza2	capping protein (actin filament) muscle Z-line, alpha 2
chr9	14641517	14642169	653	*	285	1.42323	5.36608	1.51819e-06	ATAC_KO_PBS_unique	67.5412	25.1845	Intron (ENSMUST00000160770.8/75723, intron 1 of 13)	9	14547505	14643529	96025	2	75723	ENSMUST00000160770.8	1360	ENSMUSG00000013076	Amotl1	angiomotin-like 1
chr4	147937809	147938622	814	*	440	-1.11535	6.05915	1.53269e-06	merged_common	45.3011	98.1438	Distal Intergenic	4	147909753	147936767	27015	2	18822	ENSMUST00000019199.13	-1042	ENSMUSG00000019055	Plod1	procollagen-lysine, 2-oxoglutarate 5-dioxygenase 1
chr18	53490508	53491057	550	*	229	1.11033	6.05622	1.53269e-06	merged_common	97.7744	45.2879	Intron (ENSMUST00000091900.9/225518, intron 2 of 6)	18	53472981	53575907	102927	1	225518	ENSMUST00000115399.7	17527	ENSMUSG00000069378	Prdm6	PR domain containing 6
chr12	12301499	12302521	1023	*	546	0.82965	6.8474	1.53784e-06	merged_common	153.514	86.377	Intron (ENSMUST00000069066.13/76820, intron 2 of 12)	12	12262189	12343432	81244	1	76820	ENSMUST00000222357.1	39310	ENSMUSG00000020589	Fam49a	family with sequence similarity 49, member A
chr4	95846529	95847016	488	*	73	1.87386	4.57994	1.54702e-06	ATAC_KO_PBS_unique	45.7871	12.4927	Intron (ENSMUST00000079223.10/75578, intron 13 of 15)	4	95849625	95926934	77310	1	75578	ENSMUST00000142384.1	-2609	ENSMUSG00000028573	Fggy	FGGY carbohydrate kinase domain containing
chr12	69331782	69331866	85	*	54	1.87386	4.57994	1.54702e-06	ATAC_KO_PBS_unique	45.7871	12.4927	Intron (ENSMUST00000021368.9/66244, intron 17 of 32)	12	69311568	69323652	12085	2	66244	ENSMUST00000221794.1	-8130	ENSMUSG00000020982	Nemf	nuclear export mediator factor
chr16	90456831	90457016	186	*	95	1.87386	4.57994	1.54702e-06	ATAC_KO_PBS_unique	45.7871	12.4927	Intron (ENSMUST00000065856.7/26559, intron 4 of 10)	16	90461897	90482024	20128	1	26559	ENSMUST00000231603.1	-4881	ENSMUSG00000053414	Hunk	hormonally upregulated Neu-associated kinase
chr10	4386113	4388782	2670	*	935	-0.46038	8.48305	1.57861e-06	merged_common	305.041	419.707	Promoter	10	4367075	4387475	20401	2	381990	ENSMUST00000100077.4	0	ENSMUSG00000075327	Zbtb2	zinc finger and BTB domain containing 2
chr3	41574691	41575096	406	*	247	-1.14434	6.00141	1.59057e-06	merged_common	43.0888	95.2456	Intron (ENSMUST00000026865.14/269424, intron 1 of 10)	3	41580856	41589003	8148	1	269424	ENSMUST00000195200.1	-5760	ENSMUSG00000025764	Jade1	jade family PHD finger 1
chr2	116932153	116932883	731	*	361	1.02401	6.29307	1.60309e-06	merged_common	111.823	54.9888	Distal Intergenic	2	116900194	116904557	4364	1	320975	ENSMUST00000155323.1	31959	ENSMUSG00000085316	D330050G23Rik	RIKEN cDNA D330050G23 gene
chr3	79491689	79492038	350	*	78	1.412	5.43441	1.60603e-06	ATAC_KO_PBS_unique	70.542	26.509	Intron (ENSMUST00000133154.6/329679, intron 11 of 17)	3	79459593	79500522	40930	2	329679	ENSMUST00000154645.1	8484	ENSMUSG00000061175	Fnip2	folliculin interacting protein 2
chr1	33563770	33563909	140	*	84	-1.70392	4.88574	1.62055e-06	ATAC_Control_PBS_unique	16.379	53.3605	Intron (ENSMUST00000027312.10/19076, intron 7 of 13)	1	33478942	33622142	143201	2	19076	ENSMUST00000189552.1	58233	ENSMUSG00000026134	Prim2	DNA primase, p58 subunit
chr5	143040067	143040360	294	*	221	-1.77412	4.84674	1.62055e-06	ATAC_Control_PBS_unique	15.559	53.2164	Intron (ENSMUST00000053498.12/108086, intron 13 of 16)	5	143081018	143087827	6810	2	108086	ENSMUST00000197217.1	47467	ENSMUSG00000045078	Rnf216	ring finger protein 216
chr8	46639050	46639262	213	*	181	-1.77412	4.84674	1.62055e-06	ATAC_Control_PBS_unique	15.559	53.2164	3' UTR	8	46617442	46639566	22125	1	12367	ENSMUST00000210534.1	21608	ENSMUSG00000031628	Casp3	caspase 3
chr2	143846778	143847251	474	*	392	1.71955	4.88078	1.62055e-06	ATAC_KO_PBS_unique	53.4662	16.2347	Intron (ENSMUST00000099296.3/12075, intron 3 of 7)	2	143826528	143862943	36416	2	12075	ENSMUST00000099296.3	15692	ENSMUSG00000027420	Bfsp1	beaded filament structural protein 1, in lens-CP94
chr3	107819121	107819588	468	*	94	1.69844	4.86905	1.62055e-06	ATAC_KO_PBS_unique	52.6467	16.2214	Distal Intergenic	3	107877229	107892900	15672	1	99662	ENSMUST00000037375.9	-57641	ENSMUSG00000040600	Eps8l3	EPS8-like 3
chr4	130802077	130802686	610	*	243	1.69844	4.86905	1.62055e-06	ATAC_KO_PBS_unique	52.6467	16.2214	Intron (ENSMUST00000070478.3/20970, intron 1 of 4)	4	130811938	130819059	7122	1	20970	ENSMUST00000152591.7	-9252	ENSMUSG00000025743	Sdc3	syndecan 3
chr5	53937270	53937672	403	*	110	1.69844	4.86905	1.62055e-06	ATAC_KO_PBS_unique	52.6467	16.2214	Distal Intergenic	5	53891104	53903738	12635	1	67249	ENSMUST00000202880.1	46166	ENSMUSG00000039178	Tbc1d19	TBC1 domain family, member 19
chr6	16898295	16898791	497	*	406	1.71955	4.88078	1.62055e-06	ATAC_KO_PBS_unique	53.4662	16.2347	Promoter	6	16833373	16898441	65069	2	21426	ENSMUST00000031533.10	0	ENSMUSG00000029553	Tfec	transcription factor EC
chr6	21958959	21959280	322	*	136	1.69844	4.86905	1.62055e-06	ATAC_KO_PBS_unique	52.6467	16.2214	Intron (ENSMUST00000031680.9/71777, intron 4 of 11)	6	21952057	21954256	2200	1	71777	ENSMUST00000141689.1	6902	ENSMUSG00000029670	Ing3	inhibitor of growth family, member 3
chr8	109682197	109682471	275	*	193	1.71955	4.88078	1.62055e-06	ATAC_KO_PBS_unique	53.4662	16.2347	Intron (ENSMUST00000034164.5/71955, intron 3 of 9)	8	109671773	109677594	5822	2	71955	ENSMUST00000212170.1	-4603	ENSMUSG00000031729	Ist1	increased sodium tolerance 1 homolog (yeast)
chr13	113634771	113635327	557	*	98	1.71955	4.88078	1.62055e-06	ATAC_KO_PBS_unique	53.4662	16.2347	Distal Intergenic	13	113592179	113618564	26386	2	170625	ENSMUST00000109241.4	-16207	ENSMUSG00000042364	Snx18	sorting nexin 18
chr17	13867463	13867678	216	*	118	1.69844	4.86905	1.62055e-06	ATAC_KO_PBS_unique	52.6467	16.2214	Intron (ENSMUST00000170827.8/17356, intron 22 of 32)	17	13874907	13882405	7499	1	17356	ENSMUST00000136087.1	-7229	ENSMUSG00000068036	Afdn	afadin, adherens junction formation factor
chr12	54191260	54192507	1248	*	911	1.34814	5.53841	1.66937e-06	merged_common	74.1554	29.1281	Intron (ENSMUST00000039516.3/112407, intron 1 of 4)	12	54178981	54203860	24880	2	112407	ENSMUST00000039516.3	11353	ENSMUSG00000035105	Egln3	egl-9 family hypoxia-inducible factor 3
chr8	39594632	39595082	451	*	287	1.34814	5.53841	1.66937e-06	merged_common	74.1554	29.1281	Intron (ENSMUST00000026021.13/20288, intron 8 of 9)	8	39581685	39642620	60936	2	20288	ENSMUST00000026021.13	47538	ENSMUSG00000025044	Msr1	macrophage scavenger receptor 1
chr6	88784637	88785155	519	*	446	-1.35852	5.53001	1.66937e-06	merged_common	28.855	73.9906	Exon (ENSMUST00000204640.1/ENSMUST00000204640.1, exon 1 of 1)	6	88823130	88825833	2704	1	23945	ENSMUST00000205045.1	-37975	ENSMUSG00000033174	Mgll	monoglyceride lipase
chr2	102867606	102867680	75	*	30	1.6276	5.04373	1.68e-06	ATAC_KO_PBS_unique	57.9819	18.7645	Intron (ENSMUST00000005218.14/12505, intron 1 of 18)	2	102814133	102901346	87214	2	12505	ENSMUST00000111192.2	33666	ENSMUSG00000005087	Cd44	CD44 antigen
chr3	41408849	41408986	138	*	65	1.6276	5.04373	1.68e-06	ATAC_KO_PBS_unique	57.9819	18.7645	Distal Intergenic	3	41487679	41493190	5512	2	78706	ENSMUST00000199155.1	84204	ENSMUSG00000097639	Platr4	pluripotency associated transcript 4
chr6	26403915	26404370	456	*	171	1.6276	5.04373	1.68e-06	ATAC_KO_PBS_unique	57.9819	18.7645	Distal Intergenic	6	25954485	25958159	3675	1	626904	ENSMUST00000201080.1	449430	ENSMUSG00000106799	Gm20756	predicted gene, 20756
chr8	3648439	3649255	817	*	492	1.6276	5.04373	1.68e-06	ATAC_KO_PBS_unique	57.9819	18.7645	Distal Intergenic	8	3655770	3658096	2327	1	57264	ENSMUST00000169234.2	-6515	ENSMUSG00000012705	Retn	resistin
chr15	58734045	58734640	596	*	324	1.21433	5.87431	1.68272e-06	ATAC_KO_PBS_unique	89.3549	38.5096	Distal Intergenic	15	58782269	58823530	41262	2	74868	ENSMUST00000072113.5	88890	ENSMUSG00000062373	Tmem65	transmembrane protein 65
chr6	5361893	5362412	520	*	317	1.21433	5.87431	1.68272e-06	merged_common	89.3549	38.5096	Distal Intergenic	6	5383386	5433022	49637	1	65255	ENSMUST00000043294.11	-20974	ENSMUSG00000042607	Asb4	ankyrin repeat and SOCS box-containing 4
chr10	17418053	17418724	672	*	331	1.21433	5.87431	1.68272e-06	merged_common	89.3549	38.5096	Distal Intergenic	10	17723218	17725674	2457	1	17684	ENSMUST00000038107.8	-304494	ENSMUSG00000039910	Cited2	Cbp/p300-interacting transactivator, with Glu/Asp-rich carboxy-terminal domain, 2
chr17	24549357	24550605	1249	*	594	-0.56951	7.90343	1.70256e-06	merged_common	196.539	291.668	Promoter	17	24549950	24596508	46559	1	18763	ENSMUST00000035565.4	0	ENSMUSG00000032855	Pkd1	polycystin 1, transient receptor poteintial channel interacting
chr5	138754369	138755301	933	*	581	1.2187	5.82418	1.71272e-06	merged_common	86.4342	37.1382	Promoter	5	138754514	138810077	55564	1	80752	ENSMUST00000026972.7	0	ENSMUSG00000025854	Fam20c	family with sequence similarity 20, member C
chr4	89485961	89486427	467	*	181	1.27181	5.6848	1.72864e-06	merged_common	79.9322	33.1031	Distal Intergenic	4	89421848	89463487	41640	1	102633081	ENSMUST00000139272.1	64113	NA	Gm12610	predicted gene 12610
chr13	111488937	111490773	1837	*	1098	-0.44622	8.57937	1.73708e-06	merged_common	327.706	446.489	Promoter	13	111425680	111490111	64432	2	73274	ENSMUST00000047627.13	0	ENSMUSG00000032745	Gpbp1	GC-rich promoter binding protein 1
chr15	73060489	73061716	1228	*	676	0.70104	7.29757	1.73927e-06	merged_common	200.588	123.387	Promoter	15	72589620	73061204	471585	2	76510	ENSMUST00000089770.10	0	ENSMUSG00000047921	Trappc9	trafficking protein particle complex 9
chr19	46450458	46450705	248	*	208	-2.37423	3.88078	1.74549e-06	ATAC_Control_PBS_unique	6.46955	33.542	Exon (ENSMUST00000039922.12/24069, exon 5 of 12)	19	46457906	46475634	17729	1	24069	ENSMUST00000123252.1	-7201	ENSMUSG00000025231	Sufu	SUFU negative regulator of hedgehog signaling
chr3	65319409	65319736	328	*	278	2.39382	3.89721	1.74549e-06	ATAC_KO_PBS_unique	34.1572	6.49937	Exon (ENSMUST00000159525.7/16497, exon 8 of 13)	3	65133060	65302685	169626	2	102637797	ENSMUST00000195685.1	-16724	ENSMUSG00000104093	A330015K06Rik	RIKEN cDNA A330015K06 gene
chr13	110372916	110373143	228	*	139	2.39382	3.89721	1.74549e-06	ATAC_KO_PBS_unique	34.1572	6.49937	Distal Intergenic	13	110352616	110357199	4584	2	238875	ENSMUST00000224534.1	-15717	ENSMUSG00000046006	Gapt	Grb2-binding adaptor, transmembrane
chr1	177569579	177569982	404	*	241	2.06103	4.36226	1.75638e-06	ATAC_KO_PBS_unique	42.0133	10.0683	Distal Intergenic	1	177641542	177642943	1402	2	75589	ENSMUST00000189507.1	72961	ENSMUSG00000101746	2310043L19Rik	RIKEN cDNA 2310043L19 gene
chr6	141065909	141066127	219	*	79	2.06103	4.36226	1.75638e-06	ATAC_KO_PBS_unique	42.0133	10.0683	Distal Intergenic	6	141249269	141507448	258180	1	54611	ENSMUST00000043259.9	-183142	ENSMUSG00000041741	Pde3a	phosphodiesterase 3A, cGMP inhibited
chr10	78426575	78426661	87	*	28	2.06103	4.36226	1.75638e-06	ATAC_KO_PBS_unique	42.0133	10.0683	Promoter	10	78425669	78427622	1954	1	13014	ENSMUST00000005185.7	906	ENSMUSG00000005054	Cstb	cystatin B
chr13	24616342	24616579	238	*	50	2.06103	4.36226	1.75638e-06	ATAC_KO_PBS_unique	42.0133	10.0683	Intron (ENSMUST00000110383.7/193385, intron 1 of 22)	13	24614627	24705897	91271	1	193385	ENSMUST00000132689.7	1715	ENSMUSG00000036006	Ripor2	RHO family interacting cell polarization regulator 2
chr13	83608849	83610017	1169	*	450	0.78417	7.00819	1.79317e-06	merged_common	168.929	98.0948	Intron (ENSMUST00000198199.4/17260, intron 4 of 10)	13	83625603	83662736	37134	1	17260	ENSMUST00000200138.4	-15586	ENSMUSG00000005583	Mef2c	myocyte enhancer factor 2C
chr8	41017444	41018037	594	*	311	1.05436	6.19401	1.80554e-06	merged_common	105.507	50.8026	Promoter	8	41017468	41024216	6749	1	78849	ENSMUST00000123703.1	0	ENSMUSG00000084960	B430010I23Rik	RIKEN cDNA B430010I23 gene
chr7	121446264	121446861	598	*	236	1.06402	6.19937	1.80554e-06	merged_common	106.254	50.8212	Intron (ENSMUST00000084628.4/195646, intron 1 of 1)	7	121392290	121501770	109481	1	195646	ENSMUST00000084628.4	53974	ENSMUSG00000046321	Hs3st2	heparan sulfate (glucosamine) 3-O-sulfotransferase 2
chr3	38076689	38077158	470	*	260	1.77275	4.79154	1.81853e-06	ATAC_KO_PBS_unique	51.1944	14.9821	Distal Intergenic	3	38203151	38208119	4969	2	71342	ENSMUST00000197658.1	130961	ENSMUSG00000106002	5430434I15Rik	RIKEN cDNA 5430434I15 gene
chr7	80753792	80753997	206	*	74	1.77275	4.79154	1.81853e-06	ATAC_KO_PBS_unique	51.1944	14.9821	Intron (ENSMUST00000206896.1/ENSMUST00000206896.1, intron 1 of 2)	7	80726779	80730248	3470	2	29875	ENSMUST00000205606.1	-23544	ENSMUSG00000030536	Iqgap1	IQ motif containing GTPase activating protein 1
chr11	46120144	46120489	346	*	281	1.77275	4.79154	1.81853e-06	ATAC_KO_PBS_unique	51.1944	14.9821	Intron (ENSMUST00000011400.7/11492, intron 8 of 22)	11	46127905	46143857	15953	1	11492	ENSMUST00000151565.7	-7416	ENSMUSG00000011256	Adam19	a disintegrin and metallopeptidase domain 19 (meltrin beta)
chr15	50820271	50820511	241	*	72	1.77275	4.79154	1.81853e-06	ATAC_KO_PBS_unique	51.1944	14.9821	3' UTR	15	50819499	50827521	8023	2	83925	ENSMUST00000183421.1	7010	ENSMUSG00000038679	Trps1	transcriptional repressor GATA binding 1
chr7	19936108	19936198	91	*	50	2.16229	4.22972	1.82472e-06	ATAC_KO_PBS_unique	39.6944	8.86779	Downstream (1-2kb)	7	19938182	19944898	6717	2	70080	ENSMUST00000208210.1	8700	ENSMUSG00000040498	Igsf23	immunoglobulin superfamily, member 23
chr8	53607150	53607358	209	*	70	2.16229	4.22972	1.82472e-06	ATAC_KO_PBS_unique	39.6944	8.86779	Exon (ENSMUST00000047768.10/234258, exon 5 of 10)	8	53605636	53611429	5794	2	234258	ENSMUST00000149053.7	4071	ENSMUSG00000039396	Neil3	nei like 3 (E. coli)
chr10	87830024	87830323	300	*	62	2.16229	4.22972	1.82472e-06	ATAC_KO_PBS_unique	39.6944	8.86779	Intron (ENSMUST00000146581.1/ENSMUST00000146581.1, intron 1 of 1)	10	87858265	87930895	72631	1	16000	ENSMUST00000122386.7	-27942	ENSMUSG00000020053	Igf1	insulin-like growth factor 1
chr11	77028646	77028814	169	*	74	2.16229	4.22972	1.82472e-06	ATAC_KO_PBS_unique	39.6944	8.86779	Intron (ENSMUST00000108402.8/15567, intron 14 of 14)	11	77018177	77022346	4170	1	15567	ENSMUST00000137819.1	10469	ENSMUSG00000020838	Slc6a4	solute carrier family 6 (neurotransmitter transporter, serotonin), member 4
chr11	115198908	115199174	267	*	179	2.16229	4.22972	1.82472e-06	ATAC_KO_PBS_unique	39.6944	8.86779	Intron (ENSMUST00000061450.6/320534, intron 3 of 9)	11	115184795	115187859	3065	2	66176	ENSMUST00000127419.7	-11049	ENSMUSG00000015542	Nat9	N-acetyltransferase 9 (GCN5-related, putative)
chr14	70311546	70311947	402	*	268	2.16229	4.22972	1.82472e-06	ATAC_KO_PBS_unique	39.6944	8.86779	Promoter	14	70308772	70311240	2469	2	213053	ENSMUST00000155825.1	-306	ENSMUSG00000022094	Slc39a14	solute carrier family 39 (zinc transporter), member 14
chr18	4505660	4505751	92	*	46	-2.14838	4.24593	1.82472e-06	ATAC_Control_PBS_unique	9.01133	39.9499	Distal Intergenic	18	4383246	4397330	14085	1	67440	ENSMUST00000234924.1	122414	ENSMUSG00000024234	Mtpap	mitochondrial poly(A) polymerase
chr9	77828183	77829143	961	*	517	0.84146	6.82911	1.82611e-06	merged_common	152.202	84.9405	Distal Intergenic	9	77766142	77779545	13404	1	14629	ENSMUST00000216848.1	62041	ENSMUSG00000032350	Gclc	glutamate-cysteine ligase, catalytic subunit
chr9	88273378	88273643	266	*	189	2.46217	3.93518	1.83173e-06	ATAC_KO_PBS_unique	35.9088	6.51649	Distal Intergenic	9	88327197	88372092	44896	1	23959	ENSMUST00000034992.7	-53554	ENSMUSG00000032420	Nt5e	5' nucleotidase, ecto
chr11	67047077	67047468	392	*	263	2.46217	3.93518	1.83173e-06	ATAC_KO_PBS_unique	35.9088	6.51649	Intron (ENSMUST00000146338.7/66358, intron 2 of 4)	11	67038041	67052570	14530	2	66358	ENSMUST00000116363.1	5102	ENSMUSG00000020910	Adprm	ADP-ribose/CDP-alcohol diphosphatase, manganese dependent
chrX	9462739	9463007	269	*	134	2.46217	3.93518	1.83173e-06	ATAC_KO_PBS_unique	35.9088	6.51649	Intron (ENSMUST00000015484.9/13058, intron 3 of 12)	20	9446925	9469269	22345	2	13058	ENSMUST00000164685.7	6262	ENSMUSG00000015340	Cybb	cytochrome b-245, beta polypeptide
chr17	80206126	80207906	1781	*	1143	-0.58601	7.78871	1.85335e-06	merged_common	180.481	270.918	Promoter	17	80200080	80207305	7226	2	225027	ENSMUST00000063417.10	0	ENSMUSG00000024097	Srsf7	serine/arginine-rich splicing factor 7
chr11	118270277	118270587	311	*	168	2.31378	4.09984	1.85404e-06	ATAC_KO_PBS_unique	38.2326	7.68982	Intron (ENSMUST00000106296.8/72344, intron 13 of 20)	11	118259654	118266048	6395	2	72344	ENSMUST00000141647.7	-4229	ENSMUSG00000033909	Usp36	ubiquitin specific peptidase 36
chrX	13463193	13463471	279	*	77	2.31378	4.09984	1.85404e-06	ATAC_KO_PBS_unique	38.2326	7.68982	Distal Intergenic	20	13466110	13489313	23204	1	236690	ENSMUST00000050434.5	-2639	ENSMUSG00000051228	Nyx	nyctalopin
chr11	61853920	61855420	1501	*	1171	-0.91798	6.583	1.85953e-06	merged_common	69.7446	131.78	Promoter	11	61775649	61855073	79425	2	29869	ENSMUST00000004920.3	0	ENSMUSG00000004798	Ulk2	unc-51 like kinase 2
chr15	38298725	38300250	1526	*	522	0.60608	7.71925	1.87602e-06	merged_common	259.986	170.805	Promoter	15	38294416	38299082	4667	2	21847	ENSMUST00000226363.1	0	ENSMUSG00000037465	Klf10	Kruppel-like factor 10
chr5	21188394	21189802	1409	*	241	0.98767	6.38098	1.87645e-06	merged_common	117.361	59.1844	Intron (ENSMUST00000197522.4/212167, intron 1 of 18)	5	21186313	21288642	102330	1	212167	ENSMUST00000198937.1	2081	ENSMUSG00000039934	Gsap	gamma-secretase activating protein
chr10	24164215	24165112	898	*	500	0.98767	6.38098	1.87645e-06	merged_common	117.361	59.1844	Intron (ENSMUST00000020174.6/53331, intron 2 of 9)	10	24152447	24155314	2868	1	53331	ENSMUST00000219553.1	11768	ENSMUSG00000019998	Stx7	syntaxin 7
chr3	61415958	61416804	847	*	150	1.38108	5.41724	1.88927e-06	ATAC_KO_PBS_unique	68.9644	26.4776	Distal Intergenic	3	61361638	61368430	6793	1	74012	ENSMUST00000049064.3	54320	ENSMUSG00000036894	Rap2b	RAP2B, member of RAS oncogene family
chr15	53139361	53139606	246	*	62	1.38108	5.41724	1.88927e-06	ATAC_KO_PBS_unique	68.9644	26.4776	Intron (ENSMUST00000077273.8/14042, intron 1 of 10)	15	53089931	53107868	17938	2	14042	ENSMUST00000140798.1	-31493	ENSMUSG00000061731	Ext1	exostoses (multiple) 1
chr18	61451772	61452160	389	*	295	1.51491	5.16993	1.89535e-06	ATAC_KO_PBS_unique	60.8584	21.2955	Distal Intergenic	18	61298136	61400431	102296	2	170826	ENSMUST00000075299.12	-51341	ENSMUSG00000033871	Ppargc1b	peroxisome proliferative activated receptor, gamma, coactivator 1 beta
chr19	17334775	17335432	658	*	563	1.51491	5.16993	1.89535e-06	ATAC_KO_PBS_unique	60.8584	21.2955	Intron (ENSMUST00000174236.7/14537, intron 1 of 2)	19	17326143	17339568	13426	2	14537	ENSMUST00000169897.1	4136	ENSMUSG00000038843	Gcnt1	glucosaminyl (N-acetyl) transferase 1, core 2
chrX	70363280	70363800	521	*	339	1.51491	5.16993	1.89535e-06	ATAC_KO_PBS_unique	60.8584	21.2955	Intron (ENSMUST00000101509.8/15931, intron 2 of 8)	20	70343069	70365084	22016	2	15931	ENSMUST00000101509.8	1284	ENSMUSG00000035847	Ids	iduronate 2-sulfatase
chr9	61349417	61350187	771	*	523	1.05519	6.15389	1.90659e-06	merged_common	102.643	49.3951	Distal Intergenic	9	61372366	61418497	46132	1	21887	ENSMUST00000178113.7	-22179	ENSMUSG00000032280	Tle3	transducin-like enhancer of split 3
chr14	21987557	21988659	1103	*	724	1.06514	6.15941	1.90659e-06	merged_common	103.392	49.4137	Promoter	14	21983959	21989601	5643	2	218820	ENSMUST00000043409.8	942	ENSMUSG00000039081	Zfp503	zinc finger protein 503
chr11	103006571	103007366	796	*	492	1.03381	6.2608	1.91709e-06	merged_common	109.722	53.5901	Intron (ENSMUST00000181125.1/ENSMUST00000181125.1, intron 1 of 1)	11	102999848	102999921	74	2	102466988	ENSMUST00000184841.1	-6650	ENSMUSG00000098613	Mir6931	microRNA 6931
chr19	42005387	42006340	954	*	427	1.04306	6.26593	1.91709e-06	merged_common	110.466	53.6089	Intron (ENSMUST00000026170.1/226122, intron 1 of 2)	19	41981763	42034641	52879	1	226122	ENSMUST00000026170.1	23624	ENSMUSG00000025171	Ubtd1	ubiquitin domain containing 1
chr5	24840917	24841444	528	*	44	-1.64149	4.98864	1.92349e-06	ATAC_Control_PBS_unique	17.9747	56.0789	Promoter	5	24810136	24842428	32293	2	19744	ENSMUST00000154523.1	984	ENSMUSG00000028945	Rheb	Ras homolog enriched in brain
chr17	87974523	87975785	1263	*	398	-0.67313	7.39517	1.94892e-06	merged_common	133.307	212.561	Promoter	17	87975062	87990892	15831	1	17688	ENSMUST00000005503.4	0	ENSMUSG00000005370	Msh6	mutS homolog 6
chr15	6623136	6624974	1839	*	893	1.17559	5.90368	1.95967e-06	ATAC_KO_PBS_unique	89.9764	39.8328	Intron (ENSMUST00000090461.11/23880, intron 2 of 17)	15	6619594	6632392	12799	1	23880	ENSMUST00000162430.1	3542	ENSMUSG00000022148	Fyb	FYN binding protein
chr2	94389029	94389368	340	*	145	1.17559	5.90368	1.95967e-06	merged_common	89.9764	39.8328	Intron (ENSMUST00000111237.8/74569, intron 1 of 23)	2	94378688	94404991	26304	2	74569	ENSMUST00000150266.1	15623	ENSMUSG00000027194	Ttc17	tetratricopeptide repeat domain 17
chr10	7473299	7474032	734	*	411	1.17559	5.90368	1.95967e-06	merged_common	89.9764	39.8328	Promoter	10	7440362	7473361	33000	2	77777	ENSMUST00000218087.1	0	ENSMUSG00000079685	Ulbp1	UL16 binding protein 1
chr9	72968202	72968800	599	*	401	1.09814	6.09337	2.0056e-06	merged_common	99.9019	46.666	Intron (ENSMUST00000098567.8/67685, intron 4 of 6)	9	72958852	73016319	57468	1	72278	ENSMUST00000149692.1	9350	ENSMUSG00000034563	Ccpg1	cell cycle progression 1
chr6	94221636	94222432	797	*	330	1.17875	5.85454	2.0075e-06	merged_common	87.0586	38.4567	Intron (ENSMUST00000055224.14/14924, intron 1 of 21)	6	94132923	94283025	150103	2	78178	ENSMUST00000203034.1	60593	ENSMUSG00000045095	4930511A08Rik	RIKEN cDNA 4930511A08 gene
chr9	50840883	50841664	782	*	576	-1.19412	5.84194	2.0075e-06	merged_common	37.9198	86.7625	Intron (ENSMUST00000034561.10/102580, intron 14 of 14)	9	50845301	50861761	16461	1	73699	ENSMUST00000174555.1	-3637	ENSMUSG00000032058	Ppp2r1b	protein phosphatase 2, regulatory subunit A, beta
chr2	113449371	113450526	1156	*	87	1.29771	5.57583	2.02551e-06	ATAC_KO_PBS_unique	74.7854	30.4206	Intron (ENSMUST00000099576.8/14260, intron 4 of 18)	2	113441064	113709855	268792	1	14260	ENSMUST00000081349.8	8307	ENSMUSG00000044042	Fmn1	formin 1
chr7	118542184	118542485	302	*	178	1.83201	4.69616	2.02677e-06	ATAC_KO_PBS_unique	48.9136	13.7385	Intron (ENSMUST00000044195.5/209760, intron 13 of 15)	7	118525062	118533356	8295	2	12850	ENSMUST00000032887.3	-8828	ENSMUSG00000030652	Coq7	demethyl-Q 7
chr9	106385833	106386815	983	*	536	-0.86762	6.7478	2.02749e-06	merged_common	79.561	145.171	Distal Intergenic	9	106370744	106373856	3113	1	235584	ENSMUST00000173748.1	15089	ENSMUSG00000053716	Dusp7	dual specificity phosphatase 7
chr7	46615294	46615484	191	*	41	1.22303	5.77224	2.04101e-06	ATAC_KO_PBS_unique	83.5029	35.7712	Intron (ENSMUST00000033127.11/27414, intron 7 of 10)	7	46443221	46603242	160022	2	27414	ENSMUST00000156147.7	-12052	ENSMUSG00000030839	Sergef	secretion regulating guanine nucleotide exchange factor
chr17	88581263	88582179	917	*	513	0.68956	7.32642	2.0523e-06	merged_common	203.827	126.381	Intron (ENSMUST00000038551.7/73825, intron 19 of 21)	17	88578730	88588365	9636	1	73825	ENSMUST00000185400.1	2533	ENSMUSG00000034709	Ppp1r21	protein phosphatase 1, regulatory subunit 21
chr6	17652135	17652521	387	*	292	1.29133	5.63515	2.05308e-06	ATAC_KO_PBS_unique	77.7524	31.7676	Intron (ENSMUST00000148694.7/12343, intron 4 of 5)	6	17660606	17665686	5081	1	12343	ENSMUST00000142592.1	-8085	ENSMUSG00000015733	Capza2	capping protein (actin filament) muscle Z-line, alpha 2
chr8	22411054	22411693	640	*	303	1.29133	5.63515	2.05308e-06	merged_common	77.7524	31.7676	Promoter	8	22411361	22429665	18305	1	57312	ENSMUST00000033934.4	0	ENSMUSG00000031533	Mrps31	mitochondrial ribosomal protein S31
chr11	65806341	65807632	1292	*	755	0.77963	7.02747	2.05419e-06	merged_common	170.933	99.5711	Promoter	11	65807175	65829238	22064	1	52712	ENSMUST00000071465.8	0	ENSMUSG00000018347	Zkscan6	zinc finger with KRAB and SCAN domains 6
chr11	78115145	78115808	664	*	393	-1.24679	5.71836	2.05723e-06	merged_common	34.1773	81.107	Promoter	11	78115606	78156700	41095	1	216971	ENSMUST00000155571.1	0	ENSMUSG00000037750	Fam222b	family with sequence similarity 222, member B
chr13	24792257	24792709	453	*	356	1.49932	5.24793	2.0762e-06	ATAC_KO_PBS_unique	63.8932	22.6003	Distal Intergenic	13	24801657	24816197	14541	1	79555	ENSMUST00000019276.11	-8948	ENSMUSG00000019132	BC005537	cDNA sequence BC005537
chr15	26361758	26362407	650	*	492	1.49932	5.24793	2.0762e-06	ATAC_KO_PBS_unique	63.8932	22.6003	Intron (ENSMUST00000140840.7/211147, intron 2 of 3)	15	26387719	26409576	21858	1	211147	ENSMUST00000155819.1	-25312	ENSMUSG00000022269	March11	membrane-associated ring finger (C3HC4) 11
chr1	136120314	136121085	772	*	148	-1.50207	5.25489	2.0762e-06	ATAC_Control_PBS_unique	22.688	64.2634	Distal Intergenic	1	136117256	136119529	2274	1	12292	ENSMUST00000159106.1	3058	ENSMUSG00000026407	Cacna1s	calcium channel, voltage-dependent, L type, alpha 1S subunit
chr19	4305148	4305464	317	*	81	-1.45485	5.28112	2.0762e-06	ATAC_Control_PBS_unique	23.4854	64.3802	Promoter	19	4292567	4305208	12642	2	110355	ENSMUST00000167511.1	0	ENSMUSG00000024858	Grk2	G protein-coupled receptor kinase 2
chr9	40799827	40801983	2157	*	1168	-0.43831	8.58377	2.09073e-06	merged_common	329.61	446.626	Promoter	9	40800984	40805200	4217	1	15481	ENSMUST00000015800.15	0	ENSMUSG00000015656	Hspa8	heat shock protein 8
chr9	21014646	21016858	2213	*	790	-0.58786	7.77927	2.14297e-06	merged_common	179.189	269.324	Promoter	9	21015985	21021004	5020	1	15894	ENSMUST00000215003.1	0	ENSMUSG00000037405	Icam1	intercellular adhesion molecule 1
chr10	60375629	60377416	1788	*	704	-1.04431	6.17878	2.15976e-06	merged_common	50.4445	104.036	Exon (ENSMUST00000073242.10/22295, exon 35 of 67)	10	60376866	60380192	3327	2	22295	ENSMUST00000124712.1	2776	ENSMUSG00000012819	Cdh23	cadherin 23 (otocadherin)
chr13	110902851	110903878	1028	*	534	0.6842	7.37488	2.16567e-06	merged_common	210.398	130.942	Promoter	13	110882852	110903846	20995	2	102636142	ENSMUST00000225424.1	0	NA	4930526H09Rik	RIKEN cDNA 4930526H09 gene
chr17	13685489	13686030	542	*	397	1.1361	5.97891	2.18991e-06	merged_common	93.5042	42.5433	Intron (ENSMUST00000135850.7/72578, intron 1 of 4)	17	13489273	13668891	179619	2	72578	ENSMUST00000185626.6	-16598	ENSMUSG00000117042	2700054A10Rik	RIKEN cDNA 2700054A10 gene
chr7	99665457	99665625	169	*	82	-1.53288	5.11441	2.19326e-06	ATAC_Control_PBS_unique	20.3643	58.9267	Promoter	7	99659857	99664932	5076	2	101488	ENSMUST00000154295.1	-525	ENSMUSG00000030737	Slco2b1	solute carrier organic anion transporter family, member 2b1
chr8	84217336	84217544	209	*	141	-1.58815	5.08371	2.19326e-06	ATAC_Control_PBS_unique	19.5573	58.8017	Exon (ENSMUST00000039480.6/212168, exon 12 of 14)	8	84208920	84209609	690	1	723960	ENSMUST00000180630.1	8416	ENSMUSG00000065541	Mir24-2	microRNA 24-2
chr2	152779179	152779308	130	*	78	1.56904	5.10837	2.19326e-06	ATAC_KO_PBS_unique	59.4205	20.0267	Downstream (1-2kb)	2	152755094	152765034	9941	1	84682	ENSMUST00000109821.1	24085	ENSMUSG00000009876	Cox4i2	cytochrome c oxidase subunit 4I2
chr4	8788488	8788962	475	*	362	1.56904	5.10837	2.19326e-06	ATAC_KO_PBS_unique	59.4205	20.0267	Intron (ENSMUST00000039267.9/320790, intron 3 of 37)	4	8751438	8867224	115787	1	320790	ENSMUST00000170391.1	37050	ENSMUSG00000041235	Chd7	chromodomain helicase DNA binding protein 7
chr4	62265495	62265777	283	*	187	1.55035	5.09799	2.19326e-06	ATAC_KO_PBS_unique	58.6137	20.0123	Intron (ENSMUST00000107468.7/20530, intron 1 of 4)	4	62262562	62297355	34794	1	20530	ENSMUST00000107468.7	2933	ENSMUSG00000066152	Slc31a2	solute carrier family 31, member 2
chr11	120518180	120518424	245	*	89	1.55035	5.09799	2.19326e-06	ATAC_KO_PBS_unique	58.6137	20.0123	Distal Intergenic	11	120530699	120538984	8286	1	14527	ENSMUST00000026119.7	-12275	ENSMUSG00000025127	Gcgr	glucagon receptor
chr12	55486804	55487552	749	*	488	1.55035	5.09799	2.19326e-06	ATAC_KO_PBS_unique	58.6137	20.0123	Downstream (1-2kb)	12	55490407	55491810	1404	2	18035	ENSMUST00000219869.1	4258	ENSMUSG00000021025	Nfkbia	nuclear factor of kappa light polypeptide gene enhancer in B cells inhibitor, alpha
chr13	74807617	74807736	120	*	51	1.56904	5.10837	2.19326e-06	ATAC_KO_PBS_unique	59.4205	20.0267	Promoter	13	74694288	74807939	113652	2	12380	ENSMUST00000065629.5	203	ENSMUSG00000021585	Cast	calpastatin
chr7	48975281	48975781	501	*	396	1.63085	4.94209	2.1934e-06	ATAC_KO_PBS_unique	54.0984	17.4683	Intron (ENSMUST00000183659.7/78286, intron 2 of 39)	7	48959097	49606821	647725	1	78286	ENSMUST00000183659.7	16184	ENSMUSG00000052512	Nav2	neuron navigator 2
chr8	70697656	70700951	3296	*	1204	-0.52871	8.04712	2.21079e-06	merged_common	220.214	317.69	Promoter	8	70698949	70700616	1668	1	16478	ENSMUST00000095267.5	0	ENSMUSG00000071076	Jund	jun D proto-oncogene
chr11	17008266	17009138	873	*	452	0.90912	6.5644	2.21748e-06	merged_common	129.693	69.063	Promoter	11	16971206	17008702	37497	2	56193	ENSMUST00000102881.9	0	ENSMUSG00000020120	Plek	pleckstrin
chr3	127408670	127409555	886	*	426	0.90912	6.5644	2.21748e-06	merged_common	129.693	69.063	Promoter	3	126921614	127409059	487446	2	109676	ENSMUST00000182078.8	0	ENSMUSG00000032826	Ank2	ankyrin 2, brain
chr4	118138908	118139312	405	*	147	1.4071	5.35712	2.22014e-06	ATAC_KO_PBS_unique	66.7488	25.1689	Exon (ENSMUST00000106406.8/230674, exon 20 of 22)	4	117932158	118134914	202757	2	20441	ENSMUST00000106410.7	-3994	ENSMUSG00000028538	St3gal3	ST3 beta-galactoside alpha-2,3-sialyltransferase 3
chr10	60303285	60303849	565	*	401	-1.42297	5.35712	2.22014e-06	ATAC_Control_PBS_unique	25.0308	67.1169	3' UTR	10	60303352	60305649	2298	2	22295	ENSMUST00000156501.1	1800	ENSMUSG00000012819	Cdh23	cadherin 23 (otocadherin)
chr9	21367371	21368567	1197	*	324	-0.61412	7.67802	2.22726e-06	merged_common	165.531	253.366	Promoter	9	21367871	21405360	37490	1	16201	ENSMUST00000067646.11	0	ENSMUSG00000032178	Ilf3	interleukin enhancer binding factor 3
chr2	102815691	102815790	100	*	68	1.92286	4.60716	2.24077e-06	ATAC_KO_PBS_unique	47.4584	12.5162	Intron (ENSMUST00000005218.14/12505, intron 18 of 18)	2	102761173	102781557	20385	1	20511	ENSMUST00000154446.1	54518	ENSMUSG00000005089	Slc1a2	solute carrier family 1 (glial high affinity glutamate transporter), member 2
chr9	108120738	108120994	257	*	186	1.92286	4.60716	2.24077e-06	ATAC_KO_PBS_unique	47.4584	12.5162	Intron (ENSMUST00000035208.13/12217, intron 3 of 11)	9	108096023	108110413	14391	2	12217	ENSMUST00000124763.1	-10325	ENSMUSG00000032589	Bsn	bassoon
chr10	115311310	115311641	332	*	163	1.92286	4.60716	2.24077e-06	ATAC_KO_PBS_unique	47.4584	12.5162	Intron (ENSMUST00000020343.8/216344, intron 1 of 6)	10	115287084	115315591	28508	2	216344	ENSMUST00000020343.8	3950	ENSMUSG00000020132	Rab21	RAB21, member RAS oncogene family
chr11	90244879	90245127	249	*	169	1.92286	4.60716	2.24077e-06	ATAC_KO_PBS_unique	47.4584	12.5162	Intron (ENSMUST00000124877.2/ENSMUST00000124877.2, intron 3 of 3)	11	90249456	90268465	19010	1	67468	ENSMUST00000107887.7	-4329	ENSMUSG00000003948	Mmd	monocyte to macrophage differentiation-associated
chr11	120040469	120040740	272	*	96	1.89859	4.59368	2.24077e-06	ATAC_KO_PBS_unique	46.6232	12.5046	Intron (ENSMUST00000064307.9/11302, intron 1 of 13)	11	120007320	120041782	34463	2	11302	ENSMUST00000103019.1	1042	ENSMUSG00000025375	Aatk	apoptosis-associated tyrosine kinase
chr12	32111641	32111890	250	*	99	1.89859	4.59368	2.24077e-06	ATAC_KO_PBS_unique	46.6232	12.5046	Intron (ENSMUST00000218145.1/ENSMUST00000218145.1, intron 1 of 1)	12	31958476	32061296	102821	2	19088	ENSMUST00000036497.15	-50345	ENSMUSG00000002997	Prkar2b	protein kinase, cAMP dependent regulatory, type II beta
chr13	24444633	24445015	383	*	255	1.92286	4.60716	2.24077e-06	ATAC_KO_PBS_unique	47.4584	12.5162	Intron (ENSMUST00000224953.1/12763, intron 11 of 15)	13	24417224	24436657	19434	1	12763	ENSMUST00000142882.1	27409	ENSMUSG00000016756	Cmah	cytidine monophospho-N-acetylneuraminic acid hydroxylase
chr14	59260089	59260443	355	*	160	1.92286	4.60716	2.24077e-06	ATAC_KO_PBS_unique	47.4584	12.5162	5' UTR	14	59276913	59297522	20610	2	219131	ENSMUST00000062307.4	37079	ENSMUSG00000044703	Phf11a	PHD finger protein 11A
chr18	84600617	84600923	307	*	215	1.92286	4.60716	2.24077e-06	ATAC_KO_PBS_unique	47.4584	12.5162	Distal Intergenic	18	84552909	84589725	36817	2	240476	ENSMUST00000182297.1	-10892	ENSMUSG00000048410	Zfp407	zinc finger protein 407
chrX	13851358	13851621	264	*	82	1.92286	4.60716	2.24077e-06	ATAC_KO_PBS_unique	47.4584	12.5162	Promoter	20	13714731	13851367	136637	2	12361	ENSMUST00000132240.1	0	ENSMUSG00000031012	Cask	calcium/calmodulin-dependent serine protein kinase (MAGUK family)
chr15	66103165	66103865	701	*	393	0.98768	6.34576	2.24296e-06	merged_common	114.531	57.7568	Promoter	15	66025116	66103254	78139	2	110862	ENSMUST00000183354.1	0	ENSMUSG00000056258	Kcnq3	potassium voltage-gated channel, subfamily Q, member 3
chr16	75877076	75877682	607	*	254	0.99649	6.35065	2.24296e-06	merged_common	115.272	57.7763	Intron (ENSMUST00000114239.8/67742, intron 4 of 7)	16	75888252	75909279	21028	2	67742	ENSMUST00000150248.1	31597	ENSMUSG00000022876	Samsn1	SAM domain, SH3 domain and nuclear localization signals, 1
chr11	45545768	45546909	1142	*	384	0.74593	7.09313	2.2576e-06	merged_common	176.815	105.432	Distal Intergenic	11	45808087	45841171	33085	1	100009664	ENSMUST00000137002.1	-261178	NA	F630206G17Rik	RIKEN cDNA F630206G17 gene
chr17	87314860	87315710	851	*	527	-0.7832	6.9996	2.27e-06	merged_common	97.5453	167.87	Intron (ENSMUST00000041110.11/225049, intron 5 of 19)	17	87309332	87330077	20746	1	225049	ENSMUST00000127970.7	5528	ENSMUSG00000036918	Ttc7	tetratricopeptide repeat domain 7
chr16	33894264	33894954	691	*	347	-1.06746	6.12633	2.2807e-06	merged_common	48.2548	101.129	Intron (ENSMUST00000115028.10/16419, intron 5 of 14)	16	33891947	33899402	7456	1	16419	ENSMUST00000148462.1	2317	ENSMUSG00000022817	Itgb5	integrin beta 5
chr10	84387247	84387832	586	*	217	-1.08893	6.11441	2.2807e-06	merged_common	47.5029	101.046	Intron (ENSMUST00000020220.14/77976, intron 4 of 6)	10	84375296	84392388	17093	2	77976	ENSMUST00000129355.1	4556	ENSMUSG00000020032	Nuak1	NUAK family, SNF1-like kinase, 1
chr4	122847916	122848622	707	*	284	1.06609	6.11831	2.2807e-06	merged_common	100.521	48.0101	3' UTR	4	122836254	122850259	14006	1	19063	ENSMUST00000097902.4	11662	ENSMUSG00000028657	Ppt1	palmitoyl-protein thioesterase 1
chr14	102922567	102923032	466	*	148	-1.18929	5.86735	2.34003e-06	merged_common	38.6583	88.1565	Distal Intergenic	14	102982549	102982632	84	2	100628599	ENSMUST00000175160.1	59600	ENSMUSG00000092901	Mir5130	microRNA 5130
chr13	40968446	40969399	954	*	426	0.82854	6.82193	2.34235e-06	merged_common	150.769	84.8981	Intron (ENSMUST00000153685.1/102633880, intron 1 of 4)	13	40953415	40958228	4814	1	14538	ENSMUST00000225996.1	15031	ENSMUSG00000021360	Gcnt2	glucosaminyl (N-acetyl) transferase 2, I-branching enzyme
chr4	19574687	19575671	985	*	425	0.7103	7.22984	2.37714e-06	merged_common	192.004	117.351	Promoter	4	19575162	19598654	23493	1	66302	ENSMUST00000108253.7	0	ENSMUSG00000028229	Rmdn1	regulator of microtubule dynamics 1
chr2	158780884	158781018	135	*	111	-2.93938	3.40368	2.38186e-06	ATAC_Control_PBS_unique	3.82111	29.311	Promoter	2	158781408	158786637	5230	1	71878	ENSMUST00000151801.1	-390	ENSMUSG00000027654	Fam83d	family with sequence similarity 83, member D
chr5	102113548	102113867	320	*	162	2.8075	3.4771	2.38186e-06	ATAC_KO_PBS_unique	29.4634	4.20863	Distal Intergenic	5	101929306	102069921	140616	2	72145	ENSMUST00000174698.1	-43627	ENSMUSG00000043940	Wdfy3	WD repeat and FYVE domain containing 3
chr16	77446242	77446322	81	*	17	2.8075	3.4771	2.38186e-06	ATAC_KO_PBS_unique	29.4634	4.20863	Intron (ENSMUST00000182656.7/77994, intron 4 of 7)	16	77500216	77598531	98316	1	77994	ENSMUST00000068704.11	-53894	ENSMUSG00000090386	Mir99ahg	Mir99a and Mirlet7c-1 host gene (non-protein coding)
chr11	55449266	55449957	692	*	437	-1.19921	5.81604	2.39502e-06	merged_common	37.1795	85.3693	Intron (ENSMUST00000108857.1/11927, intron 3 of 3)	11	55446644	55461197	14554	2	11927	ENSMUST00000138412.1	11240	ENSMUSG00000018585	Atox1	antioxidant 1 copper chaperone
chr12	26469133	26469999	867	*	79	1.31896	5.5222	2.39871e-06	ATAC_KO_PBS_unique	72.5891	29.0954	Promoter	12	26469204	26479837	10634	1	22169	ENSMUST00000020969.4	0	ENSMUSG00000020638	Cmpk2	cytidine monophosphate (UMP-CMP) kinase 2, mitochondrial
chr15	8037732	8038321	590	*	318	1.33364	5.53035	2.39871e-06	ATAC_KO_PBS_unique	73.3726	29.1118	Intron (ENSMUST00000045766.7/545085, intron 7 of 17)	15	7873062	8099191	226130	2	545085	ENSMUST00000045766.7	60870	ENSMUSG00000039828	Wdr70	WD repeat domain 70
chr18	43508977	43509489	513	*	171	1.31896	5.5222	2.39871e-06	ATAC_KO_PBS_unique	72.5891	29.0954	Distal Intergenic	18	43320979	43438286	117308	2	22240	ENSMUST00000121805.7	-70691	ENSMUSG00000024501	Dpysl3	dihydropyrimidinase-like 3
chr2	73396800	73397282	483	*	342	1.33364	5.53035	2.39871e-06	merged_common	73.3726	29.1118	Intron (ENSMUST00000144735.1/ENSMUST00000144735.1, intron 2 of 4)	2	73341506	73386572	45067	2	68526	ENSMUST00000076463.11	-10228	ENSMUSG00000041762	Gpr155	G protein-coupled receptor 155
chr15	66824385	66825184	800	*	384	-1.33229	5.51809	2.39871e-06	merged_common	28.8789	72.7177	Intron (ENSMUST00000065916.13/21819, intron 41 of 47)	15	66780819	66831646	50828	2	20491	ENSMUST00000164163.7	6462	ENSMUSG00000022372	Sla	src-like adaptor
chr6	88811220	88811850	631	*	435	-1.09277	6.07169	2.39899e-06	merged_common	46.0556	98.2289	Intron (ENSMUST00000113585.8/23945, intron 5 of 7)	6	88823130	88825833	2704	1	23945	ENSMUST00000205045.1	-11280	ENSMUSG00000033174	Mgll	monoglyceride lipase
chr2	151542047	151543030	984	*	465	0.99657	6.31468	2.40464e-06	merged_common	112.436	56.352	Promoter	2	151542483	151561692	19210	1	14225	ENSMUST00000044011.11	0	ENSMUSG00000032966	Fkbp1a	FK506 binding protein 1a
chr15	63500198	63501143	946	*	407	0.8575	6.73457	2.41065e-06	merged_common	143.342	79.1118	Intron (ENSMUST00000228339.2/432958, intron 2 of 8)	15	63414400	63479608	65209	2	432958	ENSMUST00000226699.1	-20590	ENSMUSG00000115520	Gm20740	predicted gene, 20740
chr12	30290495	30290998	504	*	323	-1.49119	5.20044	2.42198e-06	merged_common	21.9302	61.6503	Intron (ENSMUST00000142046.7/268534, intron 4 of 16)	12	30267031	30357683	90653	2	268534	ENSMUST00000156953.7	66685	ENSMUSG00000020672	Sntg2	syntrophin, gamma 2
chr7	55768729	55769471	743	*	293	-1.27754	5.60106	2.43774e-06	merged_common	31.1744	75.5746	Promoter	7	55768261	55778925	10665	1	233274	ENSMUST00000154933.1	468	ENSMUSG00000051504	Siglech	sialic acid binding Ig-like lectin H
chr14	14799982	14801142	1161	*	604	1.04463	6.18861	2.43805e-06	merged_common	104.759	50.7837	Distal Intergenic	14	14803415	15012059	208645	1	674895	ENSMUST00000224491.1	-2273	ENSMUSG00000042567	Nek10	NIMA (never in mitosis gene a)- related kinase 10
chr4	111719770	111720699	930	*	225	1.04463	6.18861	2.43805e-06	merged_common	104.759	50.7837	Promoter	4	111719984	111829142	109159	1	67946	ENSMUST00000038868.13	0	ENSMUSG00000034401	Spata6	spermatogenesis associated 6
chr12	73053736	73054342	607	*	316	1.25849	5.6774	2.44763e-06	merged_common	79.157	33.0861	Promoter	12	73043531	73053887	10357	2	20471	ENSMUST00000176091.1	0	ENSMUSG00000051367	Six1	sine oculis-related homeobox 1
chr13	55210395	55212794	2400	*	817	-0.73815	7.14799	2.45283e-06	merged_common	109.814	183.173	Promoter	13	55210735	55240846	30112	1	18193	ENSMUST00000224156.1	0	ENSMUSG00000021488	Nsd1	nuclear receptor-binding SET-domain protein 1
chr9	57441317	57441595	279	*	236	-1.87867	4.56464	2.45389e-06	ATAC_Control_PBS_unique	12.3403	45.3797	3' UTR	9	57415216	57440124	24909	2	66812	ENSMUST00000214065.1	-1193	ENSMUSG00000063849	Ppcdc	phosphopantothenoylcysteine decarboxylase
chr3	121721777	121722260	484	*	89	1.84864	4.56593	2.45389e-06	ATAC_KO_PBS_unique	44.95	12.4805	Exon (ENSMUST00000197391.1/ENSMUST00000197391.1, exon 1 of 1)	3	121723537	121735048	11512	1	14066	ENSMUST00000029771.12	-1277	ENSMUSG00000028128	F3	coagulation factor III
chr3	144381030	144381427	398	*	79	1.84864	4.56593	2.45389e-06	ATAC_KO_PBS_unique	44.95	12.4805	Distal Intergenic	3	144188683	144205220	16538	2	16911	ENSMUST00000196264.4	-175810	ENSMUSG00000028266	Lmo4	LIM domain only 4
chr12	72844103	72844557	455	*	286	1.84864	4.56593	2.45389e-06	ATAC_KO_PBS_unique	44.95	12.4805	Distal Intergenic	12	72786414	72790787	4374	1	19042	ENSMUST00000223221.1	57689	ENSMUSG00000021096	Ppm1a	protein phosphatase 1A, magnesium dependent, alpha isoform
[truncated: 54,297 more rows]

## Sheet: ATAC_KO_LPS_vs_ATAC_WT_LPS
seqnames	start	end	width	strand	summit	M_value	A_value	P_value	Peak_Group	normalized_read_density_in_ATAC_KO_LPS	normalized_read_density_in_ATAC_Control_LPS	annotation	geneChr	geneStart	geneEnd	geneLength	geneStrand	geneId	transcriptId	distanceToTSS	ENSEMBL	SYMBOL	GENENAME
[truncated: 72,582 more rows]

[truncated: 6 more sheets: ATAC_WT_LPS_vs_WT_PBS, ATAC_KO_LPS_vs_KO_PBS, H3K4me1_KO_PBS_vs_WT_PBS, H3K4me3_KO_PBS_vs_WT_PBS, H3K27ac_KO_PBS_vs_WT_PBS, H3K27me3_KO_PBS_vs_WT_PBS]
